# Supplementary material for: Identification of a regulatory pathway inhibiting adipogenesis via RSPO2
Source: Springer Nature journal article supplement (doi:10.1038/s42255-021-00509-1), 2022-01-13
Supplement: MOESM2 [file 42255_2021_509_MOESM2_ESM.pdf › 42255_2021_509_MOESM2_ESM.pdf]

**Extended Data Table 1: Overlapping of genes between mouse scRNAseq clusters and human snRNAseq clusters**

| <b>Human cluster 1 (H-1)</b> |                     |                    |                    |
|------------------------------|---------------------|--------------------|--------------------|
| Mouse cluster                | numOverlappingGenes | % overlaps (human) | % Overlaps (mouse) |
| P1-1                         | 3                   | 0.949              | 3.488              |
| P1-2                         | 6                   | 1.899              | 7.692              |
| P1-3                         | 3                   | 0.949              | 2.632              |
| P2-1                         | 14                  | 4.430              | 14.433             |
| P2-2                         | 15                  | <b>4.747</b>       | 13.274             |
| P3                           | 8                   | 2.532              | 16.667             |

| <b>Human cluster 2 (H-2)</b> |    |              |        |
|------------------------------|----|--------------|--------|
| P1-1                         | 21 | <b>5.185</b> | 24.419 |
| P1-2                         | 18 | 4.444        | 23.077 |
| P1-3                         | 3  | 0.741        | 2.632  |
| P2-1                         | 3  | 0.741        | 3.093  |
| P2-2                         | 6  | 1.481        | 5.310  |
| P3                           | 0  | 0.000        | 0.000  |

| <b>Human cluster 3 (H-3)</b> |    |              |        |
|------------------------------|----|--------------|--------|
| P1-1                         | 20 | 2.946        | 23.256 |
| P1-2                         | 18 | 2.651        | 23.077 |
| P1-3                         | 13 | 1.915        | 11.404 |
| P2-1                         | 21 | <b>3.093</b> | 21.649 |
| P2-2                         | 18 | 2.651        | 15.929 |
| P3                           | 9  | 1.325        | 18.750 |

## Extended data table 2

### Cell culture medium used in Figure 2 and Extend data figure 2

|                   | <b>Induction</b> (day 0 - 2)                                                                                  | <b>Maintenance</b> (from day 2)     |
|-------------------|---------------------------------------------------------------------------------------------------------------|-------------------------------------|
| <b>A</b> cocktail | DMEM<br>1µM dexamethasone<br>0.5mM isobutylmethylxanthine<br>1µM insulin                                      | DMEM<br>1 µM insulin                |
| <b>B</b> cocktail | DMEM/F12<br>1µM dexamethasone<br>0.5mM isobutylmethylxanthine<br>125nM Indomethacin<br>1nM T3<br>20nM insulin | DMEM/F12<br>1 nM T3<br>20nM insulin |
| <b>C</b> cocktail | DMEM<br>1µM insulin                                                                                           | DMEM<br>1µM insulin                 |

### **Extended data Table 3**

Marker genes of each cluster in murine Lin- cells

| gene      | p_val    | avg_log2FC | pct.1 | pct.2 | p_val_adj | cluster |
|-----------|----------|------------|-------|-------|-----------|---------|
| Isg15     | 9.2E-133 | 2.385      | 0.935 | 0.428 | 1.3E-128  | P1-3    |
| Tgm2      | 9.9E-141 | 1.969      | 0.619 | 0.099 | 1.4E-136  | P1-3    |
| Plac8     | 2.5E-107 | 1.861      | 0.997 | 0.931 | 3.6E-103  | P1-3    |
| Ccn5      | 5.2E-85  | 1.783      | 0.66  | 0.189 | 7.5E-81   | P1-3    |
| Ifit3     | 7.8E-105 | 1.762      | 0.773 | 0.243 | 1.1E-100  | P1-3    |
| Thbs2     | 2.8E-63  | 1.678      | 0.897 | 0.664 | 4.0E-59   | P1-3    |
| Bst2      | 4.2E-107 | 1.588      | 0.993 | 0.885 | 6.1E-103  | P1-3    |
| Pi16      | 6.7E-134 | 1.516      | 0.997 | 0.87  | 9.7E-130  | P1-1    |
| Il1r2     | 9.8E-96  | 1.510      | 0.776 | 0.455 | 1.4E-91   | P1-1    |
| Zbp1      | 2.8E-117 | 1.476      | 0.9   | 0.341 | 4.0E-113  | P1-3    |
| Sbsn      | 2.1E-83  | 1.464      | 0.733 | 0.383 | 3.1E-79   | P1-1    |
| Gng12     | 1.7E-98  | 1.439      | 0.979 | 0.783 | 2.4E-94   | P1-3    |
| Gas6      | 3.3E-21  | 1.410      | 0.55  | 0.307 | 4.8E-17   | P1-3    |
| Smpd3     | 2.2E-83  | 1.393      | 0.905 | 0.594 | 3.2E-79   | P1-2    |
| Ifit1     | 8.8E-97  | 1.386      | 0.732 | 0.202 | 1.3E-92   | P1-3    |
| Gpx3      | 1.3E-63  | 1.383      | 0.993 | 0.905 | 1.8E-59   | P1-3    |
| Tmem158   | 5.3E-53  | 1.382      | 0.928 | 0.701 | 7.7E-49   | P1-3    |
| Sfrp2     | 6.0E-106 | 1.356      | 0.986 | 0.772 | 8.6E-102  | P1-1    |
| Akr1c14   | 1.3E-89  | 1.349      | 0.773 | 0.261 | 1.8E-85   | P1-3    |
| Daglb     | 2.0E-100 | 1.342      | 0.628 | 0.25  | 2.9E-96   | P1-2    |
| Irf7      | 3.1E-83  | 1.336      | 0.928 | 0.519 | 4.5E-79   | P1-3    |
| Pgr       | 4.3E-231 | 1.322      | 0.612 | 0.037 | 6.2E-227  | P1-3    |
| Akr1c18   | 7.6E-88  | 1.304      | 0.736 | 0.378 | 1.1E-83   | P1-2    |
| Ifi211    | 2.4E-99  | 1.291      | 0.993 | 0.806 | 3.5E-95   | P1-3    |
| Ifi205    | 2.7E-105 | 1.277      | 1     | 0.962 | 3.9E-101  | P1-3    |
| Akr1c18   | 2.5E-55  | 1.270      | 0.814 | 0.422 | 3.7E-51   | P1-3    |
| Procr     | 3.1E-135 | 1.263      | 0.94  | 0.631 | 4.6E-131  | P1-1    |
| Ifi271l2a | 3.6E-97  | 1.255      | 1     | 0.963 | 5.2E-93   | P1-3    |
| Ifitm3    | 3.7E-122 | 1.236      | 1     | 0.999 | 5.3E-118  | P1-3    |
| Pcsk6     | 7.8E-170 | 1.216      | 0.81  | 0.273 | 1.1E-165  | P1-1    |
| Ly6a      | 1.4E-102 | 1.199      | 1     | 0.97  | 2.0E-98   | P1-3    |
| Efh1d1    | 6.0E-148 | 1.184      | 0.876 | 0.407 | 8.7E-144  | P1-1    |
| Ace       | 1.5E-167 | 1.180      | 0.973 | 0.69  | 2.2E-163  | P1-1    |
| Spon1     | 2.4E-77  | 1.178      | 0.869 | 0.368 | 3.4E-73   | P1-3    |
| Smpd3     | 1.5E-147 | 1.175      | 0.989 | 0.579 | 2.2E-143  | P1-1    |
| Ckb       | 4.3E-125 | 1.162      | 0.852 | 0.481 | 6.3E-121  | P1-1    |
| Il4ra     | 2.1E-99  | 1.157      | 0.907 | 0.385 | 3.0E-95   | P1-3    |
| Plod2     | 7.4E-89  | 1.149      | 0.876 | 0.386 | 1.1E-84   | P1-3    |
| Anxa3     | 1.4E-75  | 1.142      | 1     | 0.82  | 2.0E-71   | P1-3    |
| Trim30a   | 1.7E-88  | 1.127      | 0.828 | 0.327 | 2.5E-84   | P1-3    |
| Sema3c    | 4.4E-117 | 1.100      | 0.919 | 0.534 | 6.4E-113  | P1-2    |
| Lurap1l   | 2.1E-139 | 1.058      | 0.758 | 0.264 | 3.0E-135  | P1-1    |
| Igfbp6    | 2.5E-77  | 1.057      | 1     | 0.989 | 3.6E-73   | P1-3    |
| Oasl2     | 5.5E-90  | 1.052      | 0.808 | 0.287 | 7.9E-86   | P1-3    |
| St3gal1   | 1.7E-76  | 1.049      | 0.935 | 0.611 | 2.4E-72   | P1-3    |
| Ifi204    | 1.0E-88  | 1.042      | 1     | 0.888 | 1.5E-84   | P1-3    |
| Ccn1      | 1.7E-36  | 1.025      | 0.918 | 0.787 | 2.5E-32   | P1-3    |

|           |          |       |       |       |          |      |
|-----------|----------|-------|-------|-------|----------|------|
| Cd164     | 2.1E-80  | 1.019 | 0.969 | 0.864 | 3.1E-76  | P1-3 |
| Ngfr      | 1.1E-134 | 1.016 | 0.574 | 0.075 | 1.6E-130 | P1-3 |
| Pcolce2   | 1.7E-143 | 1.012 | 1     | 0.901 | 2.5E-139 | P1-1 |
| Serpinb6a | 2.8E-90  | 1.001 | 1     | 0.991 | 4.1E-86  | P1-3 |
| Sfrp4     | 4.7E-40  | 0.998 | 0.948 | 0.684 | 6.8E-36  | P1-3 |
| Irf7      | 5.5E-53  | 0.990 | 0.747 | 0.503 | 7.9E-49  | P1-2 |
| Cpz       | 1.3E-95  | 0.978 | 0.731 | 0.349 | 1.9E-91  | P1-1 |
| Cadm3     | 3.1E-132 | 0.976 | 0.853 | 0.391 | 4.5E-128 | P1-1 |
| Pi16      | 1.9E-94  | 0.975 | 0.997 | 0.867 | 2.8E-90  | P1-2 |
| Ly6e      | 4.4E-75  | 0.974 | 1     | 0.96  | 6.4E-71  | P1-3 |
| Cd320     | 1.2E-75  | 0.973 | 0.708 | 0.258 | 1.8E-71  | P1-3 |
| Greb1     | 2.0E-175 | 0.968 | 0.598 | 0.058 | 2.9E-171 | P1-3 |
| Gan       | 8.5E-27  | 0.967 | 0.564 | 0.308 | 1.2E-22  | P1-3 |
| H2-T23    | 4.1E-62  | 0.960 | 0.935 | 0.579 | 5.9E-58  | P1-3 |
| Mndal     | 2.5E-58  | 0.959 | 0.804 | 0.407 | 3.7E-54  | P1-3 |
| Igfbp4    | 1.6E-134 | 0.954 | 0.998 | 0.916 | 2.4E-130 | P1-1 |
| Anxa3     | 2.1E-98  | 0.947 | 1     | 0.794 | 3.1E-94  | P1-1 |
| Plac8     | 6.9E-86  | 0.936 | 0.996 | 0.92  | 1.0E-81  | P1-2 |
| Serpine2  | 1.1E-123 | 0.936 | 0.67  | 0.208 | 1.7E-119 | P1-1 |
| Dbp       | 4.3E-118 | 0.933 | 0.925 | 0.574 | 6.2E-114 | P1-2 |
| Znhit6    | 1.1E-86  | 0.926 | 0.619 | 0.16  | 1.6E-82  | P1-3 |
| Ecm1      | 5.3E-109 | 0.924 | 0.987 | 0.877 | 7.7E-105 | P1-1 |
| Scara5    | 2.4E-120 | 0.918 | 0.995 | 0.746 | 3.5E-116 | P1-1 |
| Sfrp4     | 1.1E-88  | 0.915 | 0.947 | 0.639 | 1.6E-84  | P1-2 |
| Stmn4     | 6.5E-151 | 0.913 | 0.514 | 0.078 | 9.4E-147 | P1-1 |
| Lrrn4cl   | 6.9E-107 | 0.911 | 0.963 | 0.654 | 1.0E-102 | P1-2 |
| Igfbp5    | 3.7E-52  | 0.911 | 0.931 | 0.753 | 5.3E-48  | P1-1 |
| Uqcc2     | 6.7E-132 | 0.909 | 0.987 | 0.885 | 9.8E-128 | P1-1 |
| Mfap5     | 4.3E-108 | 0.907 | 1     | 0.981 | 6.2E-104 | P1-1 |
| Sparc     | 1.4E-146 | 0.898 | 1     | 1     | 2.0E-142 | P1-1 |
| Phf11d    | 8.6E-75  | 0.881 | 0.746 | 0.263 | 1.2E-70  | P1-3 |
| Nova1     | 2.0E-97  | 0.880 | 0.936 | 0.726 | 2.9E-93  | P1-2 |
| Ackr3     | 2.2E-94  | 0.879 | 0.984 | 0.729 | 3.3E-90  | P1-1 |
| Tmem100   | 1.6E-90  | 0.876 | 0.937 | 0.615 | 2.3E-86  | P1-1 |
| Cd55      | 5.8E-89  | 0.869 | 0.824 | 0.473 | 8.4E-85  | P1-2 |
| Cldn10    | 1.3E-83  | 0.865 | 0.618 | 0.254 | 1.9E-79  | P1-1 |
| C4b       | 9.3E-42  | 0.864 | 0.856 | 0.516 | 1.4E-37  | P1-3 |
| Csf1      | 6.4E-43  | 0.857 | 0.893 | 0.654 | 9.2E-39  | P1-3 |
| Hspa1a    | 2.3E-18  | 0.853 | 0.608 | 0.408 | 3.3E-14  | P1-3 |
| Lgals9    | 1.6E-54  | 0.851 | 0.883 | 0.581 | 2.3E-50  | P1-3 |
| Qpct      | 7.8E-94  | 0.847 | 0.931 | 0.702 | 1.1E-89  | P1-1 |
| Adh7      | 1.5E-33  | 0.844 | 0.674 | 0.351 | 2.2E-29  | P1-3 |
| Oas1a     | 1.5E-102 | 0.840 | 0.636 | 0.137 | 2.2E-98  | P1-3 |
| Gfpt2     | 2.4E-78  | 0.837 | 0.842 | 0.546 | 3.5E-74  | P1-1 |
| Dpp4      | 1.6E-99  | 0.833 | 0.938 | 0.58  | 2.3E-95  | P1-2 |

|          |          |       |       |       |          |      |
|----------|----------|-------|-------|-------|----------|------|
| Mustn1   | 2.7E-90  | 0.824 | 0.758 | 0.335 | 4.0E-86  | P1-1 |
| Aldh1a3  | 2.9E-81  | 0.818 | 0.581 | 0.217 | 4.2E-77  | P1-2 |
| Pla1a    | 2.4E-24  | 0.812 | 0.911 | 0.788 | 3.5E-20  | P1-3 |
| Fbln2    | 4.4E-31  | 0.812 | 0.945 | 0.845 | 6.3E-27  | P1-3 |
| Ifi35    | 3.3E-61  | 0.810 | 0.78  | 0.366 | 4.9E-57  | P1-3 |
| Prss23   | 7.4E-79  | 0.805 | 0.978 | 0.844 | 1.1E-74  | P1-2 |
| Ifi203   | 1.9E-45  | 0.802 | 0.814 | 0.466 | 2.7E-41  | P1-3 |
| Rtp4     | 2.8E-49  | 0.797 | 0.708 | 0.315 | 4.0E-45  | P1-3 |
| Mpp6     | 3.6E-42  | 0.795 | 0.677 | 0.317 | 5.2E-38  | P1-3 |
| Adh1     | 1.5E-19  | 0.792 | 0.684 | 0.461 | 2.2E-15  | P1-3 |
| Psmb8    | 8.0E-45  | 0.788 | 0.89  | 0.648 | 1.2E-40  | P1-3 |
| Edn1     | 9.3E-56  | 0.782 | 0.575 | 0.26  | 1.4E-51  | P1-2 |
| Kif2a    | 1.8E-82  | 0.775 | 0.733 | 0.391 | 2.6E-78  | P1-1 |
| Irf4     | 8.2E-72  | 0.771 | 0.629 | 0.181 | 1.2E-67  | P1-3 |
| Gas7     | 8.2E-45  | 0.769 | 0.821 | 0.64  | 1.2E-40  | P1-2 |
| Plpp3    | 2.9E-91  | 0.764 | 0.998 | 0.983 | 4.2E-87  | P1-1 |
| Aspn     | 9.9E-69  | 0.758 | 0.957 | 0.782 | 1.4E-64  | P1-1 |
| C3       | 4.1E-59  | 0.757 | 0.919 | 0.73  | 5.9E-55  | P1-2 |
| Dact1    | 1.9E-82  | 0.752 | 0.691 | 0.318 | 2.7E-78  | P1-1 |
| Fndc1    | 2.4E-76  | 0.750 | 0.968 | 0.789 | 3.5E-72  | P1-2 |
| Camk2n1  | 2.2E-79  | 0.749 | 0.902 | 0.655 | 3.2E-75  | P1-1 |
| Apod     | 6.5E-30  | 0.748 | 0.916 | 0.815 | 9.5E-26  | P1-2 |
| Fbn1     | 3.9E-89  | 0.748 | 1     | 0.961 | 5.7E-85  | P1-1 |
| Gpc3     | 7.2E-66  | 0.747 | 0.953 | 0.734 | 1.1E-61  | P1-2 |
| Gcsh     | 4.3E-33  | 0.746 | 0.674 | 0.382 | 6.2E-29  | P1-3 |
| Clec3b   | 2.5E-125 | 0.741 | 1     | 0.972 | 3.6E-121 | P1-1 |
| Sp110    | 1.2E-52  | 0.741 | 0.704 | 0.301 | 1.7E-48  | P1-3 |
| Phf11b   | 1.0E-82  | 0.740 | 0.533 | 0.114 | 1.5E-78  | P1-3 |
| Dpp4     | 7.5E-88  | 0.735 | 0.958 | 0.583 | 1.1E-83  | P1-1 |
| Rab38    | 1.9E-100 | 0.734 | 0.541 | 0.153 | 2.8E-96  | P1-1 |
| Xaf1     | 2.4E-52  | 0.733 | 0.701 | 0.297 | 3.5E-48  | P1-3 |
| Tgfbr2   | 9.0E-46  | 0.728 | 0.986 | 0.863 | 1.3E-41  | P1-3 |
| Cd248    | 9.1E-97  | 0.726 | 1     | 0.946 | 1.3E-92  | P1-1 |
| Bst2     | 6.3E-50  | 0.725 | 0.962 | 0.875 | 9.2E-46  | P1-2 |
| Arl4d    | 4.1E-83  | 0.717 | 0.564 | 0.204 | 6.0E-79  | P1-2 |
| Aldh1a1  | 5.9E-35  | 0.717 | 0.866 | 0.614 | 8.5E-31  | P1-3 |
| Zbtb16   | 1.6E-65  | 0.715 | 0.773 | 0.471 | 2.4E-61  | P1-2 |
| Scd2     | 3.8E-72  | 0.714 | 0.831 | 0.53  | 5.6E-68  | P1-1 |
| Errfi1   | 6.2E-32  | 0.712 | 0.942 | 0.75  | 9.1E-28  | P1-3 |
| Col14a1  | 7.3E-75  | 0.711 | 0.987 | 0.814 | 1.1E-70  | P1-2 |
| Rnf213   | 9.0E-57  | 0.707 | 0.694 | 0.267 | 1.3E-52  | P1-3 |
| Slc16a9  | 1.9E-101 | 0.706 | 0.531 | 0.138 | 2.8E-97  | P1-1 |
| Lgals3bp | 8.6E-49  | 0.702 | 0.986 | 0.894 | 1.2E-44  | P1-3 |
| Ly6a     | 1.3E-91  | 0.699 | 1     | 0.965 | 1.9E-87  | P1-2 |
| Pcolce2  | 6.8E-72  | 0.696 | 0.999 | 0.898 | 9.8E-68  | P1-2 |

|          |         |       |       |       |         |      |
|----------|---------|-------|-------|-------|---------|------|
| Jpt1     | 1.3E-81 | 0.695 | 0.968 | 0.822 | 1.9E-77 | P1-1 |
| Ogn      | 1.8E-50 | 0.694 | 1     | 0.945 | 2.7E-46 | P1-3 |
| Cxcl13   | 8.9E-30 | 0.693 | 0.677 | 0.359 | 1.3E-25 | P1-3 |
| Usp18    | 1.7E-40 | 0.692 | 0.584 | 0.245 | 2.4E-36 | P1-3 |
| Ackr3    | 3.1E-59 | 0.686 | 0.944 | 0.735 | 4.5E-55 | P1-2 |
| Fndc1    | 2.7E-84 | 0.684 | 0.992 | 0.786 | 4.0E-80 | P1-1 |
| Glul     | 1.2E-69 | 0.680 | 0.882 | 0.653 | 1.7E-65 | P1-2 |
| Lgals3   | 4.7E-24 | 0.679 | 0.787 | 0.547 | 6.8E-20 | P1-3 |
| Cd34     | 2.9E-94 | 0.678 | 1     | 0.961 | 4.2E-90 | P1-2 |
| Man1a    | 1.6E-79 | 0.675 | 0.963 | 0.756 | 2.3E-75 | P1-2 |
| Wnt2     | 4.2E-58 | 0.674 | 0.675 | 0.353 | 6.2E-54 | P1-1 |
| Anxa3    | 7.3E-68 | 0.674 | 0.99  | 0.792 | 1.1E-63 | P1-2 |
| Uchl1    | 9.4E-70 | 0.665 | 0.554 | 0.205 | 1.4E-65 | P1-1 |
| Anxa1    | 8.1E-82 | 0.659 | 0.999 | 0.977 | 1.2E-77 | P1-2 |
| Mustn1   | 1.6E-59 | 0.656 | 0.69  | 0.345 | 2.4E-55 | P1-2 |
| Gm26771  | 8.1E-58 | 0.652 | 0.517 | 0.207 | 1.2E-53 | P1-1 |
| Samhd1   | 9.3E-63 | 0.647 | 0.744 | 0.426 | 1.3E-58 | P1-1 |
| Tmem100  | 1.3E-26 | 0.647 | 0.89  | 0.661 | 1.8E-22 | P1-3 |
| Il33     | 1.7E-41 | 0.646 | 0.513 | 0.252 | 2.4E-37 | P1-2 |
| Iigp1    | 6.6E-41 | 0.644 | 0.687 | 0.309 | 9.6E-37 | P1-3 |
| Ifi205   | 1.0E-72 | 0.644 | 0.997 | 0.956 | 1.4E-68 | P1-2 |
| Ackr3    | 2.6E-32 | 0.643 | 0.973 | 0.762 | 3.8E-28 | P1-3 |
| Nampt    | 1.1E-44 | 0.643 | 0.704 | 0.325 | 1.6E-40 | P1-3 |
| Errfi1   | 4.2E-39 | 0.642 | 0.888 | 0.733 | 6.1E-35 | P1-2 |
| Car8     | 2.5E-62 | 0.640 | 0.616 | 0.28  | 3.7E-58 | P1-2 |
| Akr1c14  | 6.7E-39 | 0.639 | 0.51  | 0.252 | 9.7E-35 | P1-2 |
| Emilin2  | 8.1E-72 | 0.637 | 0.981 | 0.835 | 1.2E-67 | P1-2 |
| Arhgap20 | 3.7E-79 | 0.636 | 0.576 | 0.216 | 5.3E-75 | P1-1 |
| Marcks   | 7.2E-85 | 0.636 | 1     | 0.983 | 1.0E-80 | P1-1 |
| Tspo     | 2.0E-35 | 0.635 | 0.983 | 0.931 | 2.9E-31 | P1-3 |
| Ahnak2   | 2.0E-50 | 0.635 | 0.851 | 0.639 | 2.9E-46 | P1-2 |
| Igfbp5   | 6.7E-24 | 0.635 | 0.88  | 0.763 | 9.6E-20 | P1-2 |
| Serping1 | 3.0E-76 | 0.634 | 1     | 0.985 | 4.3E-72 | P1-1 |
| Zfp385a  | 2.8E-64 | 0.632 | 0.791 | 0.458 | 4.0E-60 | P1-1 |
| B2m      | 1.2E-62 | 0.632 | 1     | 1     | 1.7E-58 | P1-2 |
| Heg1     | 3.6E-63 | 0.630 | 0.926 | 0.72  | 5.2E-59 | P1-1 |
| Prdx5    | 3.6E-30 | 0.626 | 0.976 | 0.93  | 5.3E-26 | P1-3 |
| Il18     | 1.3E-64 | 0.625 | 0.734 | 0.37  | 2.0E-60 | P1-1 |
| Car8     | 2.5E-72 | 0.624 | 0.66  | 0.276 | 3.7E-68 | P1-1 |
| Tmem45a  | 3.0E-31 | 0.624 | 0.729 | 0.438 | 4.3E-27 | P1-3 |
| Mgll     | 1.4E-70 | 0.620 | 0.707 | 0.321 | 2.1E-66 | P1-1 |
| Tmem100  | 1.3E-52 | 0.620 | 0.9   | 0.619 | 1.9E-48 | P1-2 |
| Ugdh     | 1.3E-44 | 0.618 | 0.919 | 0.761 | 1.9E-40 | P1-2 |
| Timp2    | 1.9E-95 | 0.617 | 1     | 0.997 | 2.7E-91 | P1-1 |
| Tek      | 2.9E-72 | 0.616 | 0.671 | 0.308 | 4.1E-68 | P1-1 |

|               |         |       |       |       |         |      |
|---------------|---------|-------|-------|-------|---------|------|
| Scara3        | 2.4E-54 | 0.614 | 0.876 | 0.647 | 3.5E-50 | P1-2 |
| Inmt          | 1.0E-09 | 0.613 | 0.725 | 0.628 | 1.5E-05 | P1-3 |
| Lamb2         | 1.7E-55 | 0.612 | 0.815 | 0.58  | 2.5E-51 | P1-1 |
| Timp3         | 2.3E-20 | 0.611 | 0.955 | 0.889 | 3.3E-16 | P1-3 |
| Metrnl        | 2.6E-55 | 0.610 | 0.963 | 0.867 | 3.8E-51 | P1-2 |
| Cd34          | 2.5E-43 | 0.608 | 1     | 0.966 | 3.6E-39 | P1-3 |
| Scara5        | 3.0E-63 | 0.608 | 0.97  | 0.747 | 4.3E-59 | P1-2 |
| Ankrd46       | 9.9E-47 | 0.608 | 0.646 | 0.268 | 1.4E-42 | P1-3 |
| Gbp3          | 8.3E-41 | 0.606 | 0.632 | 0.27  | 1.2E-36 | P1-3 |
| Gpx3          | 8.5E-22 | 0.604 | 0.968 | 0.898 | 1.2E-17 | P1-2 |
| Aff3          | 8.3E-51 | 0.604 | 0.55  | 0.179 | 1.2E-46 | P1-3 |
| Il17ra        | 7.0E-32 | 0.597 | 0.629 | 0.319 | 1.0E-27 | P1-3 |
| Slc43a3       | 4.2E-49 | 0.597 | 0.95  | 0.76  | 6.1E-45 | P1-1 |
| Sema3c        | 3.7E-60 | 0.593 | 0.87  | 0.556 | 5.4E-56 | P1-1 |
| Nid1          | 2.6E-99 | 0.593 | 1     | 0.994 | 3.8E-95 | P1-1 |
| Emilin2       | 1.5E-68 | 0.591 | 0.987 | 0.837 | 2.2E-64 | P1-1 |
| Cfb           | 1.3E-24 | 0.589 | 0.756 | 0.475 | 1.9E-20 | P1-3 |
| C4b           | 2.3E-29 | 0.587 | 0.706 | 0.503 | 3.3E-25 | P1-2 |
| Dbn1          | 3.2E-51 | 0.586 | 0.845 | 0.612 | 4.6E-47 | P1-1 |
| Anxa1         | 1.4E-33 | 0.583 | 1     | 0.98  | 2.1E-29 | P1-3 |
| Igfbp6        | 1.9E-66 | 0.583 | 1     | 0.987 | 2.8E-62 | P1-2 |
| Ogn           | 4.1E-60 | 0.582 | 0.997 | 0.937 | 6.0E-56 | P1-2 |
| Sp100         | 2.9E-37 | 0.581 | 0.66  | 0.317 | 4.2E-33 | P1-3 |
| Basp1         | 2.6E-48 | 0.581 | 0.924 | 0.777 | 3.7E-44 | P1-1 |
| Fgfr1         | 7.7E-66 | 0.578 | 0.962 | 0.826 | 1.1E-61 | P1-2 |
| Ppa1          | 2.0E-31 | 0.577 | 0.694 | 0.377 | 2.9E-27 | P1-3 |
| Plpp3         | 3.6E-62 | 0.574 | 0.999 | 0.983 | 5.1E-58 | P1-2 |
| Il13ra1       | 2.3E-64 | 0.573 | 0.588 | 0.254 | 3.4E-60 | P1-2 |
| Ppp1r14b      | 1.0E-57 | 0.571 | 0.929 | 0.715 | 1.5E-53 | P1-1 |
| Ebf2          | 7.9E-34 | 0.571 | 0.858 | 0.738 | 1.1E-29 | P1-2 |
| 1700019D03Rik | 4.2E-52 | 0.571 | 0.731 | 0.434 | 6.1E-48 | P1-2 |
| Fbxw17        | 2.3E-61 | 0.571 | 0.56  | 0.16  | 3.3E-57 | P1-3 |
| Csrp2         | 2.8E-51 | 0.571 | 0.993 | 0.957 | 4.0E-47 | P1-2 |
| Uap1          | 1.0E-38 | 0.570 | 0.866 | 0.711 | 1.5E-34 | P1-2 |
| Islr          | 9.7E-68 | 0.568 | 0.991 | 0.887 | 1.4E-63 | P1-2 |
| Adgrd1        | 1.0E-54 | 0.568 | 0.829 | 0.566 | 1.5E-50 | P1-1 |
| Gbp2          | 1.2E-29 | 0.567 | 0.632 | 0.327 | 1.7E-25 | P1-3 |
| Psme1         | 7.8E-29 | 0.564 | 0.876 | 0.679 | 1.1E-24 | P1-3 |
| Tgfb2         | 7.3E-26 | 0.557 | 0.601 | 0.313 | 1.1E-21 | P1-3 |
| Adamts5       | 1.4E-55 | 0.557 | 0.994 | 0.905 | 2.1E-51 | P1-1 |
| Hspa5         | 1.1E-38 | 0.555 | 0.976 | 0.932 | 1.6E-34 | P1-1 |
| Ifi27l2a      | 4.6E-38 | 0.554 | 0.997 | 0.957 | 6.6E-34 | P1-2 |
| Lims2         | 1.5E-48 | 0.554 | 0.657 | 0.373 | 2.2E-44 | P1-2 |
| Axl           | 2.5E-61 | 0.551 | 0.99  | 0.918 | 3.6E-57 | P1-2 |
| Pamr1         | 9.1E-41 | 0.548 | 0.66  | 0.405 | 1.3E-36 | P1-2 |



|         |          |        |       |       |          |      |
|---------|----------|--------|-------|-------|----------|------|
| Axl     | 4.2E-63  | 0.547  | 0.992 | 0.92  | 6.1E-59  | P1-1 |
| Thbd    | 7.3E-13  | 0.547  | 0.66  | 0.473 | 1.1E-08  | P1-3 |
| Ar      | 2.0E-50  | 0.546  | 0.976 | 0.852 | 2.8E-46  | P1-1 |
| Creb5   | 3.7E-46  | 0.544  | 0.871 | 0.638 | 5.3E-42  | P1-1 |
| Gm31378 | 2.2E-38  | 0.544  | 0.521 | 0.273 | 3.2E-34  | P1-2 |
| Ifi207  | 4.7E-23  | 0.543  | 0.835 | 0.631 | 6.9E-19  | P1-3 |
| Stat1   | 1.5E-44  | 0.543  | 0.57  | 0.21  | 2.2E-40  | P1-3 |
| Mgll    | 1.3E-54  | 0.542  | 0.656 | 0.327 | 1.9E-50  | P1-2 |
| Ccdc80  | 2.5E-34  | 0.542  | 1     | 0.986 | 3.6E-30  | P1-1 |
| Il6ra   | 5.1E-54  | 0.541  | 0.549 | 0.25  | 7.4E-50  | P1-2 |
| Lbp     | 3.3E-14  | 0.540  | 0.725 | 0.526 | 4.8E-10  | P1-3 |
| Sema3b  | 1.4E-49  | 0.540  | 0.614 | 0.32  | 2.0E-45  | P1-1 |
| Clec2d  | 2.3E-24  | 0.538  | 0.863 | 0.669 | 3.3E-20  | P1-3 |
| Col1a1  | 2.9E-39  | 0.537  | 1     | 0.997 | 4.3E-35  | P1-1 |
| Ugdh    | 1.2E-42  | 0.536  | 0.926 | 0.763 | 1.8E-38  | P1-1 |
| Npc2    | 1.1E-37  | 0.536  | 1     | 0.994 | 1.6E-33  | P1-3 |
| Ccl11   | 5.5E-22  | 0.535  | 0.889 | 0.842 | 7.9E-18  | P1-2 |
| Marcks  | 7.8E-51  | 0.534  | 0.996 | 0.984 | 1.1E-46  | P1-2 |
| Hspb8   | 8.8E-42  | 0.532  | 0.675 | 0.421 | 1.3E-37  | P1-1 |
| H2-K1   | 4.3E-35  | 0.531  | 0.985 | 0.956 | 6.3E-31  | P1-2 |
| Bmp1    | 5.1E-54  | 0.530  | 0.944 | 0.811 | 7.4E-50  | P1-1 |
| Creb5   | 1.9E-45  | 0.529  | 0.864 | 0.634 | 2.8E-41  | P1-2 |
| Poglut3 | 1.3E-43  | 0.528  | 0.738 | 0.487 | 1.9E-39  | P1-1 |
| Lrrn4cl | 2.6E-52  | 0.527  | 0.923 | 0.673 | 3.8E-48  | P1-1 |
| Il6ra   | 1.4E-39  | 0.526  | 0.66  | 0.282 | 2.0E-35  | P1-3 |
| Steap4  | 4.4E-161 | 1.525  | 0.86  | 0.244 | 6.4E-157 | P2-1 |
| Fn1     | 5.4E-149 | -2.076 | 0.922 | 0.994 | 7.9E-145 | P2-1 |
| Col4a1  | 4.3E-147 | 1.780  | 1     | 0.787 | 6.2E-143 | P2-1 |
| Gsn     | 1.7E-140 | 1.517  | 1     | 1     | 2.4E-136 | P2-1 |
| Cxcl14  | 1.8E-121 | 2.110  | 0.688 | 0.179 | 2.5E-117 | P2-1 |
| Igfbp6  | 1.3E-113 | -1.617 | 0.97  | 0.993 | 1.9E-109 | P2-1 |
| Jund    | 2.4E-113 | 1.115  | 1     | 0.997 | 3.5E-109 | P2-1 |
| Rplp1   | 8.4E-113 | -0.654 | 1     | 1     | 1.2E-108 | P2-1 |
| Col4a2  | 1.3E-111 | 1.323  | 0.992 | 0.676 | 1.9E-107 | P2-1 |
| Nrep    | 2.4E-110 | 1.482  | 0.93  | 0.53  | 3.5E-106 | P2-1 |
| Sparcl1 | 2.6E-110 | 1.523  | 0.863 | 0.345 | 3.8E-106 | P2-1 |
| Zfp36   | 5.6E-106 | 1.423  | 0.995 | 0.875 | 8.1E-102 | P2-1 |
| Col15a1 | 1.3E-103 | 1.342  | 0.944 | 0.476 | 1.9E-99  | P2-1 |
| Rps24   | 2.5E-97  | -0.580 | 1     | 1     | 3.6E-93  | P2-1 |
| Col5a3  | 7.3E-95  | 1.170  | 0.978 | 0.773 | 1.1E-90  | P2-1 |
| Jun     | 2.9E-94  | 1.102  | 1     | 0.994 | 4.2E-90  | P2-1 |
| Junb    | 9.7E-93  | 1.113  | 0.997 | 0.974 | 1.4E-88  | P2-1 |
| Egr1    | 1.3E-92  | 1.014  | 1     | 0.976 | 1.8E-88  | P2-1 |
| Anxa3   | 6.8E-91  | -2.185 | 0.602 | 0.872 | 9.9E-87  | P2-1 |
| Socs3   | 1.1E-89  | 1.457  | 0.984 | 0.753 | 1.6E-85  | P2-1 |

|         |         |        |       |       |         |      |
|---------|---------|--------|-------|-------|---------|------|
| Rps20   | 2.1E-88 | -0.557 | 1     | 1     | 3.1E-84 | P2-1 |
| Pi16    | 3.0E-86 | -3.103 | 0.769 | 0.916 | 4.3E-82 | P2-1 |
| Rps12   | 1.3E-85 | -0.648 | 1     | 1     | 1.9E-81 | P2-1 |
| Pcolce  | 8.1E-85 | 1.027  | 1     | 0.969 | 1.2E-80 | P2-1 |
| Smoc2   | 2.9E-83 | 1.353  | 0.86  | 0.469 | 4.2E-79 | P2-1 |
| Igfbp7  | 1.5E-82 | 0.996  | 1     | 0.939 | 2.2E-78 | P2-1 |
| Col6a2  | 3.0E-82 | 0.959  | 1     | 0.983 | 4.4E-78 | P2-1 |
| Col6a1  | 1.1E-80 | 0.775  | 1     | 0.995 | 1.5E-76 | P2-1 |
| Btg1    | 1.5E-78 | 1.080  | 0.978 | 0.755 | 2.2E-74 | P2-1 |
| Gask1b  | 4.5E-78 | 0.962  | 0.728 | 0.308 | 6.6E-74 | P2-1 |
| Pla1a   | 5.8E-78 | -1.529 | 0.489 | 0.846 | 8.4E-74 | P2-1 |
| Rps10   | 9.2E-78 | -0.579 | 1     | 1     | 1.3E-73 | P2-1 |
| Tmsb4x  | 1.9E-77 | -0.813 | 1     | 1     | 2.8E-73 | P2-1 |
| Slfn5   | 1.3E-76 | 1.060  | 0.987 | 0.875 | 1.9E-72 | P2-1 |
| Eef1b2  | 2.4E-76 | -0.733 | 0.978 | 0.998 | 3.4E-72 | P2-1 |
| Rps15   | 3.3E-76 | -0.526 | 1     | 1     | 4.8E-72 | P2-1 |
| Islr    | 3.7E-76 | -1.060 | 0.726 | 0.938 | 5.4E-72 | P2-1 |
| Fosb    | 1.0E-75 | 1.137  | 0.968 | 0.832 | 1.5E-71 | P2-1 |
| Anxa1   | 3.7E-74 | -1.070 | 0.93  | 0.99  | 5.4E-70 | P2-1 |
| Sfrp4   | 5.6E-74 | -1.879 | 0.371 | 0.759 | 8.1E-70 | P2-1 |
| Gpc3    | 3.2E-73 | -1.250 | 0.457 | 0.832 | 4.7E-69 | P2-1 |
| Plac8   | 3.4E-70 | -2.023 | 0.844 | 0.951 | 4.9E-66 | P2-1 |
| Mfap5   | 6.1E-70 | -1.193 | 0.97  | 0.987 | 8.9E-66 | P2-1 |
| Csrp2   | 7.9E-70 | -1.068 | 0.914 | 0.972 | 1.2E-65 | P2-1 |
| Igf1    | 1.3E-68 | 1.163  | 0.944 | 0.733 | 1.8E-64 | P2-1 |
| Dpp4    | 6.3E-68 | -1.316 | 0.309 | 0.714 | 9.1E-64 | P2-1 |
| Insig1  | 2.0E-67 | 1.034  | 0.642 | 0.255 | 3.0E-63 | P2-1 |
| Itm2b   | 5.4E-61 | 0.618  | 1     | 1     | 7.8E-57 | P2-1 |
| Hmgcs1  | 5.8E-61 | 1.182  | 0.626 | 0.274 | 8.5E-57 | P2-1 |
| Rpl31   | 1.7E-59 | -0.510 | 1     | 1     | 2.4E-55 | P2-1 |
| Ier2    | 3.3E-59 | 0.952  | 0.995 | 0.935 | 4.8E-55 | P2-1 |
| Dbi     | 1.2E-58 | 0.859  | 1     | 0.949 | 1.7E-54 | P2-1 |
| Efemp1  | 2.0E-58 | -0.975 | 0.898 | 0.959 | 2.9E-54 | P2-1 |
| Cygb    | 2.3E-57 | 0.800  | 0.968 | 0.729 | 3.4E-53 | P2-1 |
| Emilin2 | 1.3E-56 | -0.938 | 0.683 | 0.895 | 1.8E-52 | P2-1 |
| Pcolce2 | 4.1E-55 | -1.218 | 0.89  | 0.926 | 5.9E-51 | P2-1 |
| Fst     | 9.0E-55 | 1.048  | 0.922 | 0.75  | 1.3E-50 | P2-1 |
| Axl     | 1.9E-54 | -0.873 | 0.887 | 0.942 | 2.7E-50 | P2-1 |
| Gsc     | 1.4E-53 | 0.721  | 0.519 | 0.185 | 2.0E-49 | P2-1 |
| Cdkn1c  | 1.4E-53 | -1.425 | 0.352 | 0.718 | 2.0E-49 | P2-1 |
| Enpp2   | 7.5E-53 | 0.908  | 0.551 | 0.206 | 1.1E-48 | P2-1 |
| Cd63    | 8.8E-53 | 0.801  | 1     | 0.998 | 1.3E-48 | P2-1 |
| Smpd3   | 9.4E-53 | -2.318 | 0.414 | 0.702 | 1.4E-48 | P2-1 |
| Dbn1    | 1.7E-52 | -0.879 | 0.336 | 0.708 | 2.5E-48 | P2-1 |
| Rpl38   | 3.0E-52 | -0.520 | 1     | 1     | 4.4E-48 | P2-1 |

|          |         |        |       |       |         |      |
|----------|---------|--------|-------|-------|---------|------|
| Plpp1    | 3.1E-52 | 0.898  | 0.642 | 0.32  | 4.6E-48 | P2-1 |
| Nfib     | 2.2E-50 | 0.653  | 0.995 | 0.917 | 3.2E-46 | P2-1 |
| Scara3   | 3.2E-50 | -0.868 | 0.401 | 0.743 | 4.6E-46 | P2-1 |
| Tmem158  | 5.5E-50 | -1.197 | 0.473 | 0.76  | 8.0E-46 | P2-1 |
| S100a11  | 3.0E-49 | -0.600 | 1     | 1     | 4.3E-45 | P2-1 |
| Col3a1   | 1.7E-48 | 0.575  | 1     | 1     | 2.4E-44 | P2-1 |
| Tuba1a   | 8.6E-47 | 0.755  | 0.997 | 0.993 | 1.3E-42 | P2-1 |
| Dbp      | 1.6E-46 | -1.044 | 0.384 | 0.694 | 2.3E-42 | P2-1 |
| Sema3c   | 1.7E-46 | -1.181 | 0.339 | 0.664 | 2.5E-42 | P2-1 |
| Plat     | 8.8E-46 | -0.781 | 0.575 | 0.852 | 1.3E-41 | P2-1 |
| AW112010 | 1.1E-45 | 0.882  | 0.871 | 0.593 | 1.7E-41 | P2-1 |
| Fos      | 1.5E-45 | 0.667  | 1     | 0.994 | 2.2E-41 | P2-1 |
| Ptgis    | 6.3E-45 | -0.795 | 0.212 | 0.605 | 9.1E-41 | P2-1 |
| G0s2     | 1.9E-44 | 0.892  | 0.608 | 0.306 | 2.7E-40 | P2-1 |
| Selenop  | 2.0E-44 | 0.629  | 1     | 0.963 | 2.9E-40 | P2-1 |
| Myl6     | 2.0E-44 | -0.599 | 0.992 | 0.998 | 3.0E-40 | P2-1 |
| Mt1      | 4.1E-44 | 1.081  | 0.997 | 0.975 | 6.0E-40 | P2-1 |
| Htra3    | 1.0E-43 | 0.720  | 0.992 | 0.963 | 1.5E-39 | P2-1 |
| Gas7     | 1.7E-43 | -1.152 | 0.419 | 0.72  | 2.5E-39 | P2-1 |
| Il17d    | 3.3E-43 | 0.567  | 0.556 | 0.232 | 4.8E-39 | P2-1 |
| Creb3l1  | 1.2E-42 | 0.747  | 0.788 | 0.534 | 1.8E-38 | P2-1 |
| Efh1     | 1.6E-42 | -0.969 | 0.185 | 0.553 | 2.4E-38 | P2-1 |
| Col14a1  | 2.1E-42 | -0.914 | 0.704 | 0.876 | 3.0E-38 | P2-1 |
| Fbn1     | 2.8E-42 | -0.835 | 0.949 | 0.972 | 4.1E-38 | P2-1 |
| Sfrp2    | 6.6E-41 | -1.886 | 0.704 | 0.833 | 9.6E-37 | P2-1 |
| Creb5    | 7.4E-41 | -0.802 | 0.401 | 0.729 | 1.1E-36 | P2-1 |
| Adam19   | 9.0E-41 | 0.626  | 0.57  | 0.268 | 1.3E-36 | P2-1 |
| Rhoj     | 1.7E-40 | 0.615  | 0.949 | 0.806 | 2.5E-36 | P2-1 |
| Il1r1    | 2.2E-40 | 0.661  | 0.624 | 0.334 | 3.2E-36 | P2-1 |
| Pamr1    | 6.5E-40 | -0.805 | 0.148 | 0.51  | 9.4E-36 | P2-1 |
| Il11ra1  | 1.3E-39 | 0.592  | 1     | 0.968 | 1.8E-35 | P2-1 |
| Tmem100  | 2.1E-39 | -1.161 | 0.481 | 0.713 | 3.1E-35 | P2-1 |
| Serp1b6a | 3.6E-39 | -0.640 | 0.981 | 0.993 | 5.2E-35 | P2-1 |
| Nid2     | 1.3E-38 | 0.585  | 0.511 | 0.228 | 1.8E-34 | P2-1 |
| Nav1     | 1.4E-38 | 0.628  | 0.898 | 0.733 | 2.1E-34 | P2-1 |
| Cd248    | 1.7E-38 | -0.709 | 0.914 | 0.964 | 2.4E-34 | P2-1 |
| Loxl1    | 2.0E-38 | -0.523 | 0.989 | 0.991 | 2.9E-34 | P2-1 |
| Akr1c18  | 3.3E-38 | -1.638 | 0.177 | 0.502 | 4.8E-34 | P2-1 |
| Sash1    | 9.4E-38 | 0.673  | 0.745 | 0.493 | 1.4E-33 | P2-1 |
| Neat1    | 1.8E-37 | 0.800  | 0.968 | 0.9   | 2.6E-33 | P2-1 |
| Ftl1     | 2.1E-37 | 0.527  | 1     | 1     | 3.1E-33 | P2-1 |
| Met1n1   | 2.4E-37 | -0.706 | 0.758 | 0.908 | 3.5E-33 | P2-1 |
| Irf7     | 3.0E-37 | -1.304 | 0.298 | 0.597 | 4.4E-33 | P2-1 |
| Adam12   | 3.1E-37 | 0.502  | 0.567 | 0.241 | 4.5E-33 | P2-1 |
| Rarres2  | 5.6E-37 | 0.548  | 1     | 0.993 | 8.2E-33 | P2-1 |

|               |         |        |       |       |         |      |
|---------------|---------|--------|-------|-------|---------|------|
| Plpp3         | 7.2E-37 | -0.803 | 0.995 | 0.985 | 1.0E-32 | P2-1 |
| Lrrn4cl       | 5.7E-36 | -0.821 | 0.5   | 0.758 | 8.2E-32 | P2-1 |
| Ubc           | 2.1E-35 | 0.641  | 0.995 | 0.986 | 3.1E-31 | P2-1 |
| Auts2         | 8.7E-35 | 0.543  | 0.726 | 0.399 | 1.3E-30 | P2-1 |
| Hspg2         | 1.7E-34 | 0.582  | 0.941 | 0.859 | 2.5E-30 | P2-1 |
| Fyn           | 2.0E-34 | -0.603 | 0.567 | 0.81  | 2.9E-30 | P2-1 |
| Mmp3          | 2.9E-34 | 0.816  | 0.855 | 0.615 | 4.1E-30 | P2-1 |
| Errfi1        | 5.4E-34 | -0.904 | 0.578 | 0.797 | 7.8E-30 | P2-1 |
| Ackr3         | 9.3E-34 | -1.097 | 0.68  | 0.798 | 1.4E-29 | P2-1 |
| Bmper         | 9.7E-34 | 0.544  | 0.578 | 0.278 | 1.4E-29 | P2-1 |
| H2-D1         | 9.7E-34 | 0.709  | 1     | 0.989 | 1.4E-29 | P2-1 |
| Uqcc2         | 1.9E-33 | -0.660 | 0.823 | 0.918 | 2.8E-29 | P2-1 |
| Ccl11         | 2.1E-33 | 0.571  | 0.976 | 0.835 | 3.0E-29 | P2-1 |
| Osr1          | 3.7E-33 | -0.701 | 0.457 | 0.738 | 5.4E-29 | P2-1 |
| Procr         | 4.1E-33 | -0.927 | 0.484 | 0.728 | 5.9E-29 | P2-1 |
| 1700019D03Rik | 5.1E-33 | -0.713 | 0.228 | 0.542 | 7.3E-29 | P2-1 |
| Nfia          | 6.8E-33 | 0.544  | 0.952 | 0.855 | 9.9E-29 | P2-1 |
| Tgoln1        | 1.0E-32 | 0.581  | 0.825 | 0.638 | 1.4E-28 | P2-1 |
| Nmt2          | 1.8E-32 | -0.688 | 0.43  | 0.702 | 2.7E-28 | P2-1 |
| Cadm3         | 2.6E-32 | -0.725 | 0.215 | 0.529 | 3.8E-28 | P2-1 |
| S100a10       | 2.7E-32 | -0.514 | 1     | 1     | 4.0E-28 | P2-1 |
| Acaa2         | 3.5E-32 | -0.563 | 0.513 | 0.788 | 5.0E-28 | P2-1 |
| Ugdh          | 1.2E-31 | -0.762 | 0.618 | 0.824 | 1.7E-27 | P2-1 |
| Ly6a          | 2.0E-31 | -0.839 | 0.997 | 0.97  | 2.9E-27 | P2-1 |
| Dnajb1        | 2.1E-31 | 1.296  | 0.68  | 0.475 | 3.0E-27 | P2-1 |
| Cd34          | 4.4E-31 | -0.614 | 0.987 | 0.967 | 6.4E-27 | P2-1 |
| Timp2         | 9.8E-31 | -0.559 | 0.997 | 0.998 | 1.4E-26 | P2-1 |
| Cxcl1         | 8.1E-30 | 0.907  | 0.806 | 0.588 | 1.2E-25 | P2-1 |
| Samhd1        | 1.3E-29 | -0.626 | 0.226 | 0.533 | 2.0E-25 | P2-1 |
| Gadd45g       | 1.4E-29 | 1.081  | 0.847 | 0.696 | 2.1E-25 | P2-1 |
| Svep1         | 1.5E-29 | 0.565  | 0.669 | 0.405 | 2.2E-25 | P2-1 |
| Ablim1        | 1.6E-29 | -0.620 | 0.519 | 0.747 | 2.3E-25 | P2-1 |
| Gnpnat1       | 2.9E-29 | -0.582 | 0.196 | 0.503 | 4.2E-25 | P2-1 |
| Ifrd1         | 4.8E-29 | 0.830  | 0.704 | 0.503 | 6.9E-25 | P2-1 |
| H2-K1         | 7.0E-29 | 0.628  | 0.995 | 0.958 | 1.0E-24 | P2-1 |
| Tnfaip6       | 1.1E-28 | 0.751  | 0.927 | 0.787 | 1.6E-24 | P2-1 |
| Igfbp5        | 1.6E-28 | 0.592  | 0.957 | 0.766 | 2.3E-24 | P2-1 |
| Tgfbr2        | 2.0E-28 | -0.668 | 0.782 | 0.889 | 2.9E-24 | P2-1 |
| Zbtb16        | 2.6E-28 | -0.636 | 0.285 | 0.578 | 3.8E-24 | P2-1 |
| Cd55          | 5.2E-28 | -0.828 | 0.336 | 0.586 | 7.5E-24 | P2-1 |
| Igfbp4        | 9.3E-28 | -0.768 | 0.938 | 0.932 | 1.4E-23 | P2-1 |
| Lgals1        | 1.5E-27 | -0.646 | 1     | 0.999 | 2.2E-23 | P2-1 |
| Ifi27         | 2.3E-27 | 0.599  | 0.925 | 0.813 | 3.4E-23 | P2-1 |
| Poglut3       | 2.3E-27 | -0.563 | 0.293 | 0.576 | 3.4E-23 | P2-1 |
| Adamts5       | 3.2E-27 | 0.566  | 0.973 | 0.916 | 4.6E-23 | P2-1 |

|          |          |        |       |       |          |      |
|----------|----------|--------|-------|-------|----------|------|
| Abca1    | 5.7E-27  | -0.556 | 0.331 | 0.617 | 8.2E-23  | P2-1 |
| Ppp1r15a | 9.0E-27  | 0.566  | 0.806 | 0.611 | 1.3E-22  | P2-1 |
| Postn    | 9.8E-27  | -1.084 | 0.965 | 0.979 | 1.4E-22  | P2-1 |
| Mycbp2   | 1.2E-26  | 0.520  | 0.772 | 0.561 | 1.7E-22  | P2-1 |
| Plod1    | 3.8E-26  | 0.590  | 0.597 | 0.374 | 5.5E-22  | P2-1 |
| Mmp23    | 1.6E-25  | -0.534 | 0.747 | 0.877 | 2.4E-21  | P2-1 |
| Tgfbr3   | 1.8E-25  | -0.527 | 0.645 | 0.809 | 2.6E-21  | P2-1 |
| Flrt2    | 2.2E-24  | -0.580 | 0.425 | 0.654 | 3.2E-20  | P2-1 |
| Scara5   | 2.6E-24  | -0.682 | 0.704 | 0.812 | 3.8E-20  | P2-1 |
| Fndc1    | 1.6E-23  | -0.724 | 0.788 | 0.836 | 2.3E-19  | P2-1 |
| Vgll3    | 2.2E-23  | -0.543 | 0.234 | 0.502 | 3.2E-19  | P2-1 |
| Frmd6    | 2.4E-23  | 0.515  | 0.839 | 0.657 | 3.5E-19  | P2-1 |
| Cotl1    | 6.6E-23  | -0.537 | 0.551 | 0.751 | 9.5E-19  | P2-1 |
| Atf4     | 7.4E-23  | 0.515  | 0.863 | 0.772 | 1.1E-18  | P2-1 |
| Adgrd1   | 1.3E-22  | -0.511 | 0.401 | 0.654 | 1.9E-18  | P2-1 |
| Atp6v1e1 | 1.6E-22  | -0.517 | 0.554 | 0.747 | 2.3E-18  | P2-1 |
| Hk2      | 2.7E-22  | 0.934  | 0.715 | 0.52  | 4.0E-18  | P2-1 |
| Nbl1     | 1.7E-21  | -0.551 | 0.868 | 0.925 | 2.5E-17  | P2-1 |
| Ppp1r14b | 2.4E-21  | -0.570 | 0.621 | 0.78  | 3.5E-17  | P2-1 |
| Bst2     | 1.4E-20  | -0.980 | 0.863 | 0.9   | 2.1E-16  | P2-1 |
| Nr4a1    | 4.3E-20  | -0.767 | 0.277 | 0.516 | 6.2E-16  | P2-1 |
| Apod     | 5.0E-20  | -0.789 | 0.739 | 0.852 | 7.2E-16  | P2-1 |
| Nova1    | 1.5E-19  | -0.614 | 0.677 | 0.788 | 2.2E-15  | P2-1 |
| Aldh1a1  | 5.2E-19  | -0.514 | 0.465 | 0.665 | 7.5E-15  | P2-1 |
| Jpt1     | 6.6E-19  | -0.527 | 0.763 | 0.866 | 9.5E-15  | P2-1 |
| Heg1     | 2.0E-18  | -0.514 | 0.648 | 0.78  | 3.0E-14  | P2-1 |
| Scd2     | 1.8E-17  | 0.544  | 0.731 | 0.574 | 2.6E-13  | P2-1 |
| Gng12    | 7.0E-17  | -0.554 | 0.704 | 0.817 | 1.0E-12  | P2-1 |
| Il1r2    | 1.7E-15  | -0.941 | 0.382 | 0.544 | 2.5E-11  | P2-1 |
| Ccn1     | 2.0E-15  | -0.698 | 0.685 | 0.816 | 2.8E-11  | P2-1 |
| Cebpb    | 2.1E-14  | 0.501  | 0.952 | 0.908 | 3.1E-10  | P2-1 |
| Ifitm3   | 3.6E-14  | -0.525 | 0.997 | 1     | 5.2E-10  | P2-1 |
| H2-T23   | 1.5E-13  | -0.514 | 0.478 | 0.634 | 2.2E-09  | P2-1 |
| Mt2      | 1.3E-12  | 0.584  | 0.919 | 0.865 | 1.9E-08  | P2-1 |
| Lgals3   | 1.1E-11  | -0.541 | 0.441 | 0.59  | 1.6E-07  | P2-1 |
| Phlda1   | 1.4E-10  | 0.635  | 0.841 | 0.765 | 2.0E-06  | P2-1 |
| Ccl7     | 1.2E-08  | 1.481  | 0.505 | 0.413 | 1.8E-04  | P2-1 |
| Cd9      | 1.9E-08  | -0.566 | 0.621 | 0.679 | 2.7E-04  | P2-1 |
| Hmcn1    | 1.3E-303 | 1.898  | 0.693 | 0.054 | 1.8E-299 | P2-2 |
| Sdc1     | 4.9E-277 | 1.745  | 0.752 | 0.115 | 7.1E-273 | P2-2 |
| Cdh11    | 3.9E-269 | 1.476  | 0.787 | 0.141 | 5.7E-265 | P2-2 |
| Clec3b   | 4.3E-249 | -1.484 | 0.926 | 0.995 | 6.2E-245 | P2-2 |
| Ly6a     | 3.1E-235 | -1.840 | 0.903 | 0.997 | 4.5E-231 | P2-2 |
| Col18a1  | 3.7E-209 | 1.808  | 0.826 | 0.31  | 5.4E-205 | P2-2 |
| Frem1    | 1.1E-205 | 0.902  | 0.513 | 0.042 | 1.5E-201 | P2-2 |

|          |          |        |       |       |          |      |
|----------|----------|--------|-------|-------|----------|------|
| Serping1 | 3.9E-204 | -1.351 | 0.964 | 0.996 | 5.7E-200 | P2-2 |
| Ptger3   | 1.9E-196 | 1.000  | 0.595 | 0.085 | 2.7E-192 | P2-2 |
| Peg3     | 2.3E-191 | 1.698  | 0.761 | 0.242 | 3.3E-187 | P2-2 |
| Scara5   | 4.6E-189 | -1.521 | 0.489 | 0.904 | 6.7E-185 | P2-2 |
| Postn    | 1.3E-187 | 1.750  | 0.993 | 0.972 | 1.9E-183 | P2-2 |
| Lum      | 1.7E-185 | 1.219  | 0.996 | 0.989 | 2.4E-181 | P2-2 |
| Angptl2  | 1.3E-183 | 1.448  | 0.979 | 0.842 | 1.9E-179 | P2-2 |
| Palld    | 1.3E-180 | 1.497  | 0.774 | 0.273 | 1.9E-176 | P2-2 |
| C3       | 7.1E-178 | -1.508 | 0.427 | 0.892 | 1.0E-173 | P2-2 |
| Gpx3     | 1.0E-177 | -2.092 | 0.752 | 0.969 | 1.5E-173 | P2-2 |
| Mdk      | 1.6E-177 | 1.481  | 0.702 | 0.193 | 2.3E-173 | P2-2 |
| Smpd3    | 2.7E-177 | -2.914 | 0.286 | 0.795 | 3.9E-173 | P2-2 |
| Scg3     | 2.0E-172 | 1.606  | 0.584 | 0.109 | 2.9E-168 | P2-2 |
| Pcolce2  | 9.3E-171 | -1.516 | 0.777 | 0.971 | 1.4E-166 | P2-2 |
| Col15a1  | 1.1E-170 | 1.248  | 0.926 | 0.402 | 1.6E-166 | P2-2 |
| Gsn      | 2.9E-168 | -1.257 | 1     | 1     | 4.2E-164 | P2-2 |
| Ackr3    | 5.1E-164 | -1.630 | 0.478 | 0.887 | 7.4E-160 | P2-2 |
| Anxa3    | 7.1E-164 | -2.007 | 0.644 | 0.904 | 1.0E-159 | P2-2 |
| Timp2    | 2.0E-163 | -0.972 | 0.995 | 0.999 | 2.9E-159 | P2-2 |
| Slc43a3  | 2.1E-160 | -1.252 | 0.479 | 0.91  | 3.0E-156 | P2-2 |
| Pi16     | 1.2E-159 | -2.888 | 0.766 | 0.941 | 1.7E-155 | P2-2 |
| Cd34     | 1.8E-159 | -1.083 | 0.906 | 0.991 | 2.6E-155 | P2-2 |
| Lgals1   | 3.0E-157 | 1.009  | 1     | 0.999 | 4.3E-153 | P2-2 |
| Tmem100  | 4.4E-157 | -1.615 | 0.325 | 0.806 | 6.3E-153 | P2-2 |
| Ogn      | 3.0E-156 | -1.222 | 0.842 | 0.988 | 4.3E-152 | P2-2 |
| Sfrp4    | 2.0E-155 | -1.943 | 0.38  | 0.823 | 2.9E-151 | P2-2 |
| Fth1     | 5.7E-154 | -0.728 | 1     | 1     | 8.2E-150 | P2-2 |
| Rbp1     | 1.4E-153 | 1.184  | 0.914 | 0.52  | 2.0E-149 | P2-2 |
| Ldhb     | 2.6E-152 | 1.140  | 0.612 | 0.153 | 3.7E-148 | P2-2 |
| Dpp4     | 1.4E-148 | -1.386 | 0.303 | 0.785 | 2.1E-144 | P2-2 |
| Col4a2   | 4.0E-146 | 1.155  | 0.97  | 0.629 | 5.7E-142 | P2-2 |
| Nxn      | 5.2E-139 | 0.908  | 0.523 | 0.108 | 7.5E-135 | P2-2 |
| Sh3bgrl3 | 9.8E-138 | 1.094  | 0.983 | 0.882 | 1.4E-133 | P2-2 |
| Srpx     | 1.4E-137 | 1.102  | 0.965 | 0.812 | 2.0E-133 | P2-2 |
| Fndc1    | 3.8E-137 | -1.195 | 0.587 | 0.913 | 5.6E-133 | P2-2 |
| Plpp3    | 2.9E-136 | -1.165 | 0.968 | 0.993 | 4.2E-132 | P2-2 |
| Col5a2   | 4.7E-135 | 0.849  | 0.996 | 0.99  | 6.8E-131 | P2-2 |
| Fabp4    | 3.9E-132 | 2.803  | 0.797 | 0.444 | 5.7E-128 | P2-2 |
| Ifi27l2a | 2.4E-130 | -1.411 | 0.898 | 0.989 | 3.5E-126 | P2-2 |
| Slc9a3r2 | 9.3E-130 | 0.799  | 0.604 | 0.165 | 1.3E-125 | P2-2 |
| Adam12   | 1.1E-126 | 0.949  | 0.607 | 0.171 | 1.6E-122 | P2-2 |
| Txndc5   | 1.7E-123 | 0.875  | 0.992 | 0.909 | 2.5E-119 | P2-2 |
| Lrrn4cl  | 2.9E-122 | -1.181 | 0.447 | 0.82  | 4.2E-118 | P2-2 |
| Prss23   | 6.8E-121 | -1.138 | 0.674 | 0.943 | 9.9E-117 | P2-2 |
| Igfbp5   | 3.0E-120 | -2.033 | 0.577 | 0.863 | 4.3E-116 | P2-2 |

|          |          |        |       |       |          |      |
|----------|----------|--------|-------|-------|----------|------|
| Tcf4     | 2.7E-119 | 1.279  | 0.966 | 0.869 | 3.9E-115 | P2-2 |
| Ar       | 1.5E-117 | -0.952 | 0.686 | 0.943 | 2.1E-113 | P2-2 |
| Col4a1   | 9.1E-116 | 0.942  | 0.984 | 0.756 | 1.3E-111 | P2-2 |
| Sema3c   | 9.7E-114 | -1.304 | 0.307 | 0.73  | 1.4E-109 | P2-2 |
| Arid5b   | 1.1E-112 | 0.846  | 0.682 | 0.261 | 1.5E-108 | P2-2 |
| Igfbp7   | 4.3E-111 | 0.894  | 0.997 | 0.929 | 6.3E-107 | P2-2 |
| Serpine1 | 4.3E-109 | 1.306  | 0.55  | 0.163 | 6.2E-105 | P2-2 |
| Procr    | 5.7E-109 | -1.356 | 0.455 | 0.779 | 8.2E-105 | P2-2 |
| Cd9      | 2.4E-107 | 0.998  | 0.899 | 0.595 | 3.5E-103 | P2-2 |
| Ecm1     | 2.3E-106 | -1.022 | 0.791 | 0.937 | 3.4E-102 | P2-2 |
| Prelp    | 2.9E-105 | -0.915 | 0.303 | 0.734 | 4.2E-101 | P2-2 |
| Angptl4  | 5.4E-105 | 1.115  | 0.758 | 0.379 | 7.8E-101 | P2-2 |
| Man1a    | 1.1E-104 | -0.888 | 0.566 | 0.884 | 1.6E-100 | P2-2 |
| Cadm3    | 1.2E-101 | -0.994 | 0.166 | 0.599 | 1.8E-97  | P2-2 |
| Gsto1    | 2.2E-100 | 0.722  | 0.556 | 0.179 | 3.3E-96  | P2-2 |
| Col27a1  | 5.5E-100 | 0.682  | 0.556 | 0.168 | 7.9E-96  | P2-2 |
| Aspn     | 5.1E-99  | -0.971 | 0.583 | 0.899 | 7.4E-95  | P2-2 |
| Itga2b   | 2.5E-98  | 0.973  | 0.54  | 0.182 | 3.6E-94  | P2-2 |
| Fscn1    | 4.3E-98  | 0.791  | 0.67  | 0.277 | 6.2E-94  | P2-2 |
| Adamts12 | 9.1E-98  | 0.804  | 0.714 | 0.333 | 1.3E-93  | P2-2 |
| Nova1    | 1.8E-96  | -0.959 | 0.557 | 0.848 | 2.6E-92  | P2-2 |
| Sparcl1  | 3.9E-96  | 1.009  | 0.732 | 0.302 | 5.7E-92  | P2-2 |
| Mgll     | 5.6E-96  | -0.871 | 0.078 | 0.514 | 8.1E-92  | P2-2 |
| Gfpt2    | 6.1E-96  | -1.009 | 0.319 | 0.707 | 8.9E-92  | P2-2 |
| Axl      | 1.4E-95  | -0.840 | 0.859 | 0.961 | 2.0E-91  | P2-2 |
| Eid1     | 2.4E-95  | 0.833  | 0.877 | 0.639 | 3.5E-91  | P2-2 |
| Ppp1r14b | 4.9E-95  | -0.919 | 0.549 | 0.832 | 7.1E-91  | P2-2 |
| Il18     | 5.5E-95  | -0.942 | 0.134 | 0.554 | 8.0E-91  | P2-2 |
| Itm2a    | 6.6E-95  | 0.918  | 0.981 | 0.93  | 9.6E-91  | P2-2 |
| Pgrmc1   | 4.3E-93  | 0.876  | 0.878 | 0.676 | 6.2E-89  | P2-2 |
| Tshz2    | 9.4E-92  | -0.797 | 0.561 | 0.877 | 1.4E-87  | P2-2 |
| Mustn1   | 2.3E-91  | -1.032 | 0.111 | 0.532 | 3.4E-87  | P2-2 |
| Anxa5    | 4.5E-91  | 0.739  | 0.992 | 0.941 | 6.5E-87  | P2-2 |
| Tmem119  | 2.3E-90  | 0.766  | 0.73  | 0.355 | 3.4E-86  | P2-2 |
| Abi3bp   | 3.4E-88  | -0.781 | 0.63  | 0.906 | 4.9E-84  | P2-2 |
| Qpct     | 2.4E-87  | -0.868 | 0.523 | 0.828 | 3.5E-83  | P2-2 |
| Timp3    | 1.2E-84  | -0.713 | 0.718 | 0.957 | 1.7E-80  | P2-2 |
| Sgk1     | 6.5E-84  | 0.937  | 0.699 | 0.351 | 9.4E-80  | P2-2 |
| Tpbp     | 2.9E-83  | 0.696  | 0.581 | 0.233 | 4.2E-79  | P2-2 |
| Plac8    | 4.4E-83  | -1.684 | 0.878 | 0.958 | 6.4E-79  | P2-2 |
| Tsix     | 6.3E-83  | 0.651  | 0.69  | 0.3   | 9.2E-79  | P2-2 |
| Sh3pxd2a | 9.1E-82  | 0.672  | 0.58  | 0.23  | 1.3E-77  | P2-2 |
| Snhg18   | 1.0E-81  | 0.641  | 0.985 | 0.912 | 1.5E-77  | P2-2 |
| Mafb     | 1.4E-81  | 1.145  | 0.579 | 0.23  | 2.0E-77  | P2-2 |
| Cthrc1   | 1.5E-81  | 1.113  | 0.541 | 0.205 | 2.2E-77  | P2-2 |

|               |         |        |       |       |         |      |
|---------------|---------|--------|-------|-------|---------|------|
| Blvrb         | 4.3E-80 | -0.690 | 0.695 | 0.895 | 6.3E-76 | P2-2 |
| Gna12         | 2.1E-79 | 0.600  | 0.525 | 0.192 | 3.0E-75 | P2-2 |
| Gadd45g       | 3.5E-79 | -1.472 | 0.483 | 0.794 | 5.1E-75 | P2-2 |
| Dpt           | 1.7E-78 | -0.507 | 0.996 | 0.998 | 2.5E-74 | P2-2 |
| Eva1b         | 3.2E-78 | 0.669  | 0.895 | 0.672 | 4.6E-74 | P2-2 |
| Emilin2       | 9.0E-78 | -0.814 | 0.777 | 0.899 | 1.3E-73 | P2-2 |
| 1810058l24Rik | 2.1E-77 | 0.713  | 0.968 | 0.871 | 3.0E-73 | P2-2 |
| Tceal9        | 7.5E-77 | 0.604  | 0.993 | 0.944 | 1.1E-72 | P2-2 |
| H2-D1         | 1.5E-75 | -0.698 | 0.966 | 0.998 | 2.1E-71 | P2-2 |
| Gstt1         | 2.7E-75 | -0.691 | 0.525 | 0.848 | 3.9E-71 | P2-2 |
| Cd55          | 5.9E-75 | -0.953 | 0.295 | 0.643 | 8.6E-71 | P2-2 |
| Fkbp9         | 4.9E-74 | 0.583  | 0.987 | 0.956 | 7.1E-70 | P2-2 |
| Gadd45b       | 1.9E-73 | 0.832  | 0.609 | 0.268 | 2.7E-69 | P2-2 |
| Cald1         | 2.4E-73 | 0.689  | 0.98  | 0.917 | 3.5E-69 | P2-2 |
| Scara3        | 1.4E-72 | -0.781 | 0.497 | 0.769 | 2.0E-68 | P2-2 |
| Tgfbr2        | 1.7E-72 | -0.748 | 0.741 | 0.921 | 2.5E-68 | P2-2 |
| Prrx1         | 3.3E-72 | -0.676 | 0.803 | 0.94  | 4.7E-68 | P2-2 |
| Akr1c18       | 6.1E-72 | -1.568 | 0.204 | 0.548 | 8.9E-68 | P2-2 |
| Ace           | 6.4E-72 | -0.870 | 0.556 | 0.816 | 9.3E-68 | P2-2 |
| Bmper         | 1.8E-71 | 0.651  | 0.564 | 0.232 | 2.6E-67 | P2-2 |
| Il1r2         | 9.5E-71 | -1.372 | 0.282 | 0.606 | 1.4E-66 | P2-2 |
| Cotl1         | 2.7E-70 | 0.765  | 0.879 | 0.674 | 3.9E-66 | P2-2 |
| Ifitm3        | 2.7E-70 | -0.740 | 0.999 | 1     | 3.9E-66 | P2-2 |
| Lamb1         | 5.4E-70 | 0.680  | 0.871 | 0.65  | 7.8E-66 | P2-2 |
| Auts2         | 6.5E-70 | 0.694  | 0.689 | 0.356 | 9.4E-66 | P2-2 |
| Hspg2         | 7.6E-70 | 0.617  | 0.953 | 0.841 | 1.1E-65 | P2-2 |
| Cfb           | 2.2E-69 | -0.922 | 0.235 | 0.594 | 3.2E-65 | P2-2 |
| Heg1          | 3.5E-69 | -0.745 | 0.58  | 0.826 | 5.1E-65 | P2-2 |
| Phlda3        | 5.1E-69 | 0.587  | 0.621 | 0.28  | 7.4E-65 | P2-2 |
| 1700019D03Rik | 5.2E-68 | -0.710 | 0.224 | 0.597 | 7.6E-64 | P2-2 |
| Gda           | 9.4E-68 | -0.690 | 0.24  | 0.6   | 1.4E-63 | P2-2 |
| Efhd1         | 2.1E-67 | -0.955 | 0.268 | 0.587 | 3.1E-63 | P2-2 |
| Cryab         | 7.8E-67 | -0.775 | 0.385 | 0.713 | 1.1E-62 | P2-2 |
| Abrac1        | 1.6E-66 | 0.658  | 0.889 | 0.711 | 2.3E-62 | P2-2 |
| Thbd          | 5.7E-66 | -0.845 | 0.238 | 0.578 | 8.3E-62 | P2-2 |
| Mfap2         | 4.3E-65 | 0.601  | 0.988 | 0.973 | 6.2E-61 | P2-2 |
| Cd248         | 7.7E-65 | -0.682 | 0.923 | 0.969 | 1.1E-60 | P2-2 |
| Emilin1       | 8.0E-65 | 0.694  | 0.658 | 0.37  | 1.2E-60 | P2-2 |
| Timp1         | 1.3E-64 | 0.938  | 0.64  | 0.339 | 1.9E-60 | P2-2 |
| Col5a3        | 1.7E-64 | 0.651  | 0.932 | 0.754 | 2.5E-60 | P2-2 |
| C1qtnf12      | 2.2E-64 | 0.541  | 0.529 | 0.214 | 3.3E-60 | P2-2 |
| Tmem158       | 5.2E-64 | -1.032 | 0.549 | 0.783 | 7.6E-60 | P2-2 |
| Tagln2        | 9.0E-64 | 0.750  | 0.903 | 0.735 | 1.3E-59 | P2-2 |
| Tusc3         | 3.3E-63 | 0.692  | 0.769 | 0.526 | 4.8E-59 | P2-2 |
| Sod3          | 3.5E-63 | -0.606 | 0.685 | 0.894 | 5.1E-59 | P2-2 |



|               |         |        |       |       |         |      |
|---------------|---------|--------|-------|-------|---------|------|
| Atpif1        | 7.3E-63 | 0.517  | 0.988 | 0.95  | 1.1E-58 | P2-2 |
| Sbsn          | 1.4E-62 | -1.515 | 0.228 | 0.535 | 2.1E-58 | P2-2 |
| Fgfr1         | 2.0E-62 | -0.615 | 0.73  | 0.9   | 2.9E-58 | P2-2 |
| Anxa1         | 3.7E-62 | -0.718 | 0.98  | 0.983 | 5.4E-58 | P2-2 |
| Creg1         | 5.0E-62 | 0.668  | 0.879 | 0.689 | 7.2E-58 | P2-2 |
| Uqcc2         | 1.2E-61 | -0.686 | 0.839 | 0.929 | 1.7E-57 | P2-2 |
| Igfbp6        | 1.4E-61 | -0.774 | 0.991 | 0.99  | 2.1E-57 | P2-2 |
| Rcn3          | 3.4E-61 | 0.518  | 0.996 | 0.991 | 5.0E-57 | P2-2 |
| Mmp19         | 5.9E-61 | 0.625  | 0.603 | 0.303 | 8.6E-57 | P2-2 |
| Apbb1ip       | 8.2E-61 | 0.687  | 0.703 | 0.431 | 1.2E-56 | P2-2 |
| Serpinb6a     | 1.6E-60 | -0.583 | 0.988 | 0.993 | 2.3E-56 | P2-2 |
| Irs2          | 2.2E-60 | 0.658  | 0.588 | 0.283 | 3.2E-56 | P2-2 |
| Ptprs         | 2.9E-60 | 0.525  | 0.583 | 0.278 | 4.2E-56 | P2-2 |
| Txn1          | 4.7E-60 | -0.524 | 0.991 | 0.999 | 6.8E-56 | P2-2 |
| Myl12a        | 6.4E-60 | 0.538  | 0.999 | 0.991 | 9.2E-56 | P2-2 |
| Fkbp10        | 8.5E-60 | 0.616  | 0.809 | 0.581 | 1.2E-55 | P2-2 |
| Emp3          | 2.6E-59 | -0.591 | 0.907 | 0.972 | 3.8E-55 | P2-2 |
| Lims2         | 1.0E-58 | -0.662 | 0.197 | 0.521 | 1.5E-54 | P2-2 |
| Marcks        | 1.2E-58 | -0.623 | 0.979 | 0.989 | 1.7E-54 | P2-2 |
| Adamts5       | 1.7E-58 | -0.704 | 0.839 | 0.952 | 2.5E-54 | P2-2 |
| Xdh           | 4.7E-58 | -0.619 | 0.384 | 0.69  | 6.8E-54 | P2-2 |
| Gstm1         | 7.8E-58 | -0.559 | 0.89  | 0.978 | 1.1E-53 | P2-2 |
| Adam23        | 9.8E-58 | 0.683  | 0.679 | 0.403 | 1.4E-53 | P2-2 |
| Zfp385a       | 3.8E-56 | -0.680 | 0.31  | 0.603 | 5.5E-52 | P2-2 |
| Rarres2       | 9.9E-56 | -0.537 | 0.984 | 0.997 | 1.4E-51 | P2-2 |
| Ccdc50        | 1.1E-55 | 0.596  | 0.736 | 0.499 | 1.6E-51 | P2-2 |
| Ahnak2        | 1.3E-55 | -0.643 | 0.463 | 0.765 | 1.9E-51 | P2-2 |
| Rcn1          | 6.7E-55 | 0.526  | 0.981 | 0.927 | 9.7E-51 | P2-2 |
| Tle5          | 9.8E-55 | -0.539 | 0.723 | 0.89  | 1.4E-50 | P2-2 |
| Glul          | 2.4E-54 | -0.633 | 0.53  | 0.766 | 3.5E-50 | P2-2 |
| Tpm4          | 3.5E-54 | 0.622  | 0.917 | 0.783 | 5.0E-50 | P2-2 |
| Ugdh          | 7.2E-54 | -0.756 | 0.656 | 0.846 | 1.0E-49 | P2-2 |
| D630033O11Rik | 4.7E-53 | 0.613  | 0.514 | 0.238 | 6.9E-49 | P2-2 |
| Mgp           | 4.9E-53 | 1.359  | 0.519 | 0.242 | 7.2E-49 | P2-2 |
| Samhd1        | 5.5E-53 | -0.647 | 0.272 | 0.569 | 8.0E-49 | P2-2 |
| Nbl1          | 6.5E-53 | -0.516 | 0.817 | 0.952 | 9.5E-49 | P2-2 |
| H2-K1         | 7.6E-53 | -0.624 | 0.901 | 0.984 | 1.1E-48 | P2-2 |
| Ech1          | 8.7E-53 | 0.630  | 0.874 | 0.719 | 1.3E-48 | P2-2 |
| Thy1          | 1.5E-52 | 0.721  | 0.934 | 0.811 | 2.2E-48 | P2-2 |
| Ccnd2         | 6.5E-52 | 0.720  | 0.871 | 0.698 | 9.5E-48 | P2-2 |
| Ifngr2        | 1.9E-51 | 0.544  | 0.613 | 0.335 | 2.7E-47 | P2-2 |
| Uap1          | 2.3E-51 | -0.656 | 0.596 | 0.798 | 3.4E-47 | P2-2 |
| Fam102b       | 4.1E-51 | 0.631  | 0.757 | 0.547 | 5.9E-47 | P2-2 |
| Pofut2        | 4.6E-51 | 0.528  | 0.82  | 0.635 | 6.7E-47 | P2-2 |
| Jpt1          | 5.2E-51 | -0.661 | 0.777 | 0.878 | 7.5E-47 | P2-2 |

|         |         |        |       |       |         |      |
|---------|---------|--------|-------|-------|---------|------|
| Fgl2    | 6.9E-51 | -0.714 | 0.442 | 0.727 | 1.0E-46 | P2-2 |
| Selenop | 3.5E-50 | -0.606 | 0.921 | 0.984 | 5.0E-46 | P2-2 |
| Ebf2    | 1.1E-49 | -0.658 | 0.621 | 0.814 | 1.6E-45 | P2-2 |
| Ctsk    | 1.8E-49 | 0.619  | 0.966 | 0.916 | 2.7E-45 | P2-2 |
| Lamb2   | 9.9E-49 | -0.595 | 0.443 | 0.693 | 1.4E-44 | P2-2 |
| Maf     | 1.1E-48 | 0.630  | 0.906 | 0.791 | 1.6E-44 | P2-2 |
| Dpysl3  | 1.3E-48 | 0.637  | 0.789 | 0.615 | 1.9E-44 | P2-2 |
| Fbn1    | 2.0E-48 | -0.606 | 0.941 | 0.979 | 2.8E-44 | P2-2 |
| C4b     | 4.6E-48 | -0.896 | 0.352 | 0.617 | 6.7E-44 | P2-2 |
| Csf1    | 8.1E-48 | -0.596 | 0.493 | 0.741 | 1.2E-43 | P2-2 |
| Pmp22   | 1.9E-47 | -0.561 | 0.805 | 0.931 | 2.8E-43 | P2-2 |
| Errfi1  | 2.1E-47 | -0.833 | 0.636 | 0.814 | 3.0E-43 | P2-2 |
| Lbp     | 2.4E-47 | -0.716 | 0.349 | 0.613 | 3.5E-43 | P2-2 |
| Osr2    | 2.7E-47 | -0.649 | 0.501 | 0.734 | 3.9E-43 | P2-2 |
| Pdlim2  | 3.8E-47 | 0.538  | 0.83  | 0.62  | 5.6E-43 | P2-2 |
| Ddah2   | 8.8E-47 | -0.502 | 0.827 | 0.927 | 1.3E-42 | P2-2 |
| Rhob    | 1.6E-46 | 0.618  | 0.811 | 0.606 | 2.3E-42 | P2-2 |
| Camk2n1 | 1.7E-46 | -0.640 | 0.572 | 0.753 | 2.4E-42 | P2-2 |
| Fhl1    | 2.4E-46 | -0.606 | 0.348 | 0.622 | 3.5E-42 | P2-2 |
| Ifi211  | 5.1E-46 | -0.676 | 0.713 | 0.863 | 7.5E-42 | P2-2 |
| Ttc3    | 6.5E-46 | 0.510  | 0.758 | 0.531 | 9.4E-42 | P2-2 |
| Pde8a   | 2.1E-45 | -0.547 | 0.246 | 0.529 | 3.1E-41 | P2-2 |
| Ddr2    | 8.7E-45 | -0.511 | 0.817 | 0.927 | 1.3E-40 | P2-2 |
| St3gal1 | 3.7E-44 | -0.597 | 0.458 | 0.707 | 5.4E-40 | P2-2 |
| Bst2    | 8.6E-44 | -0.937 | 0.813 | 0.923 | 1.3E-39 | P2-2 |
| Penk    | 4.3E-43 | 0.935  | 0.626 | 0.39  | 6.2E-39 | P2-2 |
| Prrx2   | 5.3E-42 | 0.569  | 0.626 | 0.381 | 7.7E-38 | P2-2 |
| Ugp2    | 6.6E-42 | -0.520 | 0.464 | 0.69  | 9.5E-38 | P2-2 |
| Lysmd2  | 9.2E-42 | 0.545  | 0.863 | 0.726 | 1.3E-37 | P2-2 |
| Slc25a5 | 9.6E-42 | 0.525  | 0.945 | 0.882 | 1.4E-37 | P2-2 |
| Triobp  | 2.1E-41 | -0.540 | 0.385 | 0.619 | 3.1E-37 | P2-2 |
| Col14a1 | 3.9E-41 | -0.511 | 0.702 | 0.906 | 5.6E-37 | P2-2 |
| Klf4    | 2.4E-40 | -0.596 | 0.906 | 0.98  | 3.4E-36 | P2-2 |
| Mfap5   | 2.7E-40 | -0.670 | 0.979 | 0.987 | 4.0E-36 | P2-2 |
| Sox4    | 2.3E-39 | 0.580  | 0.671 | 0.432 | 3.3E-35 | P2-2 |
| Gng11   | 5.4E-39 | 0.602  | 0.766 | 0.57  | 7.8E-35 | P2-2 |
| Cdkn1c  | 9.5E-39 | 1.122  | 0.783 | 0.633 | 1.4E-34 | P2-2 |
| Klf3    | 1.6E-38 | -0.557 | 0.435 | 0.659 | 2.4E-34 | P2-2 |
| Fkbp11  | 1.9E-38 | 0.518  | 0.718 | 0.503 | 2.7E-34 | P2-2 |
| Sat1    | 3.4E-38 | 0.637  | 0.942 | 0.89  | 5.0E-34 | P2-2 |
| Creb5   | 5.1E-38 | -0.569 | 0.533 | 0.739 | 7.4E-34 | P2-2 |
| Btg2    | 2.2E-37 | 0.642  | 0.956 | 0.878 | 3.1E-33 | P2-2 |
| Oaf     | 3.1E-37 | 0.585  | 0.95  | 0.904 | 4.5E-33 | P2-2 |
| Slc38a2 | 2.9E-35 | 0.503  | 0.87  | 0.755 | 4.2E-31 | P2-2 |
| Ddx3x   | 6.7E-35 | 0.504  | 0.82  | 0.701 | 9.7E-31 | P2-2 |

|          |         |        |       |       |         |      |
|----------|---------|--------|-------|-------|---------|------|
| Pcolce   | 2.4E-34 | -0.650 | 0.965 | 0.976 | 3.5E-30 | P2-2 |
| Ifi205   | 2.4E-34 | -0.639 | 0.913 | 0.984 | 3.5E-30 | P2-2 |
| Lgals9   | 2.9E-34 | -0.502 | 0.446 | 0.667 | 4.3E-30 | P2-2 |
| Phlda1   | 6.1E-33 | -0.600 | 0.642 | 0.82  | 8.9E-29 | P2-2 |
| AW112010 | 6.2E-33 | -0.592 | 0.468 | 0.683 | 9.0E-29 | P2-2 |
| Ckb      | 3.6E-32 | -0.637 | 0.423 | 0.606 | 5.2E-28 | P2-2 |
| Scd2     | 3.4E-27 | -0.541 | 0.468 | 0.637 | 5.0E-23 | P2-2 |
| Apod     | 5.4E-26 | -0.638 | 0.753 | 0.867 | 7.8E-22 | P2-2 |
| Irf7     | 1.1E-25 | -0.794 | 0.435 | 0.601 | 1.6E-21 | P2-2 |
| Smoc2    | 1.5E-23 | -0.560 | 0.37  | 0.569 | 2.2E-19 | P2-2 |
| Neat1    | 7.6E-20 | 0.552  | 0.942 | 0.897 | 1.1E-15 | P2-2 |
| Mt2      | 5.2E-19 | -0.617 | 0.791 | 0.899 | 7.6E-15 | P2-2 |
| Gas7     | 2.9E-18 | -0.611 | 0.608 | 0.707 | 4.3E-14 | P2-2 |
| Cxcl1    | 3.5E-11 | -0.566 | 0.544 | 0.641 | 5.1E-07 | P2-2 |
| Igf1     | 6.8E-11 | -0.544 | 0.726 | 0.771 | 9.8E-07 | P2-2 |
| Hk2      | 3.2E-09 | -0.521 | 0.47  | 0.57  | 4.7E-05 | P2-2 |
| Ggt5     | 3.0E-29 | 0.523  | 0.698 | 0.364 | 4.3E-25 | P1-3 |
| Prep     | 4.3E-48 | 0.520  | 0.836 | 0.568 | 6.2E-44 | P1-1 |
| Lamc1    | 1.0E-56 | 0.519  | 0.984 | 0.944 | 1.5E-52 | P1-1 |
| Nmt2     | 2.0E-39 | 0.518  | 0.824 | 0.621 | 2.9E-35 | P1-2 |
| Sulf2    | 7.1E-49 | 0.517  | 0.617 | 0.317 | 1.0E-44 | P1-1 |
| Sdf2l1   | 4.2E-43 | 0.517  | 0.554 | 0.286 | 6.2E-39 | P1-1 |
| Gda      | 1.6E-22 | 0.514  | 0.753 | 0.481 | 2.3E-18 | P1-3 |
| Triobp   | 3.1E-28 | 0.513  | 0.828 | 0.53  | 4.5E-24 | P1-3 |
| Timp2    | 1.1E-68 | 0.513  | 1     | 0.997 | 1.6E-64 | P1-2 |
| Pik3ip1  | 5.6E-51 | 0.509  | 0.535 | 0.254 | 8.1E-47 | P1-2 |
| Vegfd    | 1.1E-21 | 0.507  | 0.787 | 0.556 | 1.6E-17 | P1-3 |
| Psmb10   | 6.0E-21 | 0.506  | 0.732 | 0.525 | 8.7E-17 | P1-3 |
| Ddah2    | 7.2E-58 | 0.505  | 0.981 | 0.881 | 1.1E-53 | P1-1 |
| Ablim1   | 1.1E-38 | 0.505  | 0.851 | 0.679 | 1.6E-34 | P1-2 |
| Snx18    | 3.1E-48 | 0.504  | 0.628 | 0.334 | 4.5E-44 | P1-1 |
| Npc2     | 6.3E-31 | 0.503  | 0.996 | 0.995 | 9.1E-27 | P1-2 |
| Fhl1     | 3.0E-25 | 0.500  | 0.677 | 0.515 | 4.4E-21 | P1-2 |
| Tnfaip6  | 2.1E-11 | -0.500 | 0.747 | 0.821 | 3.0E-07 | P1-1 |
| Pcolce   | 1.7E-25 | -0.503 | 0.959 | 0.977 | 2.5E-21 | P1-2 |
| Ltbp4    | 1.1E-25 | -0.513 | 0.308 | 0.51  | 1.6E-21 | P1-1 |
| Zbtb16   | 1.9E-21 | -0.515 | 0.412 | 0.575 | 2.7E-17 | P1-1 |
| Slc25a5  | 6.3E-25 | -0.516 | 0.842 | 0.913 | 9.1E-21 | P1-1 |
| AW112010 | 3.1E-09 | -0.516 | 0.564 | 0.646 | 4.5E-05 | P1-1 |
| Cd63     | 3.8E-17 | -0.517 | 1     | 0.998 | 5.5E-13 | P1-3 |
| Fos      | 7.6E-12 | -0.517 | 0.99  | 0.995 | 1.1E-07 | P1-3 |
| Eva1b    | 4.8E-29 | -0.517 | 0.609 | 0.761 | 6.9E-25 | P1-1 |
| Egfr     | 1.0E-34 | -0.517 | 0.666 | 0.815 | 1.5E-30 | P1-2 |
| Col5a2   | 8.8E-44 | -0.518 | 0.987 | 0.993 | 1.3E-39 | P1-2 |
| Rrbp1    | 4.9E-50 | -0.520 | 0.979 | 0.995 | 7.1E-46 | P1-2 |

|         |         |        |       |       |         |      |
|---------|---------|--------|-------|-------|---------|------|
| Angptl2 | 1.4E-07 | -0.520 | 0.857 | 0.883 | 2.1E-03 | P1-2 |
| C4b     | 2.5E-08 | -0.522 | 0.493 | 0.565 | 3.7E-04 | P1-1 |
| Apbb1ip | 1.4E-26 | -0.525 | 0.338 | 0.544 | 2.1E-22 | P1-1 |
| Anxa5   | 8.0E-17 | -0.528 | 0.921 | 0.958 | 1.2E-12 | P1-3 |
| Socs3   | 6.9E-16 | -0.529 | 0.718 | 0.799 | 1.0E-11 | P1-1 |
| Rhob    | 2.5E-12 | -0.530 | 0.509 | 0.674 | 3.6E-08 | P1-3 |
| Ly6e    | 3.2E-24 | -0.532 | 0.937 | 0.971 | 4.7E-20 | P1-1 |
| Adam23  | 3.2E-27 | -0.541 | 0.304 | 0.518 | 4.6E-23 | P1-1 |
| Fbln2   | 1.9E-23 | -0.542 | 0.783 | 0.875 | 2.7E-19 | P1-1 |
| Akap12  | 1.3E-22 | -0.544 | 0.378 | 0.654 | 1.9E-18 | P1-3 |
| Jun     | 1.6E-23 | -0.547 | 0.994 | 0.995 | 2.3E-19 | P1-2 |
| Tcf4    | 3.7E-11 | -0.547 | 0.883 | 0.897 | 5.4E-07 | P1-2 |
| Fosb    | 2.4E-17 | -0.550 | 0.783 | 0.869 | 3.4E-13 | P1-2 |
| Smoc2   | 1.3E-05 | -0.554 | 0.436 | 0.528 | 1.8E-01 | P1-3 |
| Creb3l1 | 1.6E-33 | -0.555 | 0.391 | 0.618 | 2.4E-29 | P1-2 |
| Gas1    | 2.0E-26 | -0.556 | 0.814 | 0.888 | 2.9E-22 | P1-2 |
| Tubb5   | 1.4E-23 | -0.556 | 0.878 | 0.936 | 2.0E-19 | P1-1 |
| Abca8a  | 6.7E-16 | -0.560 | 0.344 | 0.565 | 9.7E-12 | P1-3 |
| Nupr1   | 5.4E-23 | -0.563 | 0.918 | 0.963 | 7.8E-19 | P1-3 |
| Postn   | 1.5E-07 | -0.563 | 0.99  | 0.974 | 2.2E-03 | P1-2 |
| Hspg2   | 1.1E-19 | -0.563 | 0.811 | 0.876 | 1.5E-15 | P1-3 |
| Fam102b | 2.7E-19 | -0.565 | 0.388 | 0.623 | 3.9E-15 | P1-3 |
| Hk2     | 3.5E-13 | -0.567 | 0.436 | 0.577 | 5.0E-09 | P1-2 |
| Fn1     | 2.7E-15 | -0.567 | 0.997 | 0.983 | 4.0E-11 | P1-3 |
| Slc25a5 | 1.1E-33 | -0.569 | 0.846 | 0.913 | 1.5E-29 | P1-2 |
| Ckb     | 2.5E-11 | -0.571 | 0.423 | 0.574 | 3.6E-07 | P1-3 |
| Ctsk    | 1.9E-14 | -0.571 | 0.893 | 0.933 | 2.7E-10 | P1-3 |
| Hspa5   | 3.2E-37 | -0.575 | 0.901 | 0.953 | 4.6E-33 | P1-2 |
| Smoc2   | 6.6E-17 | -0.576 | 0.397 | 0.555 | 9.6E-13 | P1-2 |
| Junb    | 4.2E-24 | -0.585 | 0.968 | 0.98  | 6.1E-20 | P1-1 |
| Snhg18  | 3.4E-23 | -0.588 | 0.876 | 0.937 | 5.0E-19 | P1-3 |
| Btg1    | 1.7E-27 | -0.591 | 0.657 | 0.817 | 2.5E-23 | P1-1 |
| B2m     | 9.1E-35 | -0.594 | 1     | 1     | 1.3E-30 | P1-1 |
| Ctsk    | 1.9E-29 | -0.603 | 0.895 | 0.938 | 2.8E-25 | P1-1 |
| Neat1   | 3.8E-11 | -0.605 | 0.825 | 0.918 | 5.5E-07 | P1-3 |
| Aebp1   | 3.8E-25 | -0.610 | 0.993 | 0.993 | 5.5E-21 | P1-3 |
| Fosb    | 2.5E-09 | -0.611 | 0.821 | 0.852 | 3.7E-05 | P1-3 |
| Anxa5   | 2.2E-44 | -0.615 | 0.91  | 0.968 | 3.3E-40 | P1-2 |
| Fkbp9   | 3.4E-31 | -0.616 | 0.911 | 0.969 | 5.0E-27 | P1-3 |
| Srpx    | 7.4E-18 | -0.616 | 0.857 | 0.849 | 1.1E-13 | P1-1 |
| Jun     | 7.2E-12 | -0.617 | 0.986 | 0.995 | 1.0E-07 | P1-3 |
| Zfp36   | 1.0E-15 | -0.618 | 0.849 | 0.902 | 1.5E-11 | P1-1 |
| Eva1b   | 6.7E-24 | -0.628 | 0.526 | 0.751 | 9.7E-20 | P1-3 |
| Fmo1    | 3.9E-44 | -0.629 | 0.222 | 0.522 | 5.6E-40 | P1-1 |
| Fst     | 1.4E-14 | -0.630 | 0.625 | 0.788 | 2.1E-10 | P1-3 |

|          |         |        |       |       |         |      |
|----------|---------|--------|-------|-------|---------|------|
| Cd63     | 2.3E-49 | -0.635 | 0.998 | 0.998 | 3.3E-45 | P1-1 |
| Ccnd2    | 1.2E-19 | -0.648 | 0.564 | 0.762 | 1.7E-15 | P1-3 |
| Fosb     | 1.3E-24 | -0.669 | 0.8   | 0.862 | 1.9E-20 | P1-1 |
| Auts2    | 1.3E-43 | -0.671 | 0.225 | 0.505 | 2.0E-39 | P1-2 |
| Col1a1   | 1.7E-54 | -0.673 | 1     | 0.997 | 2.4E-50 | P1-2 |
| Adamts5  | 1.5E-21 | -0.676 | 0.887 | 0.928 | 2.2E-17 | P1-3 |
| Ifi27    | 8.8E-46 | -0.677 | 0.713 | 0.862 | 1.3E-41 | P1-2 |
| Ccnd2    | 4.8E-40 | -0.688 | 0.612 | 0.781 | 7.0E-36 | P1-2 |
| Psap     | 1.3E-44 | -0.692 | 0.976 | 0.992 | 1.9E-40 | P1-3 |
| Col1a2   | 4.6E-71 | -0.695 | 1     | 1     | 6.7E-67 | P1-2 |
| Col5a2   | 2.9E-34 | -0.696 | 0.979 | 0.993 | 4.3E-30 | P1-3 |
| Itm2a    | 5.6E-21 | -0.705 | 0.89  | 0.949 | 8.1E-17 | P1-3 |
| Sparc    | 1.4E-72 | -0.706 | 1     | 1     | 2.1E-68 | P1-2 |
| Igf1     | 1.5E-21 | -0.711 | 0.557 | 0.782 | 2.2E-17 | P1-3 |
| Col6a1   | 1.3E-45 | -0.713 | 0.99  | 0.996 | 1.9E-41 | P1-3 |
| Tcf4     | 9.0E-17 | -0.717 | 0.814 | 0.903 | 1.3E-12 | P1-3 |
| Angptl2  | 1.7E-22 | -0.718 | 0.868 | 0.879 | 2.5E-18 | P1-1 |
| Col3a1   | 2.6E-78 | -0.719 | 1     | 1     | 3.7E-74 | P1-2 |
| Bst2     | 9.8E-11 | -0.725 | 0.902 | 0.894 | 1.4E-06 | P1-1 |
| Col1a2   | 7.4E-37 | -0.726 | 1     | 1     | 1.1E-32 | P1-3 |
| Ccl11    | 1.8E-25 | -0.732 | 0.815 | 0.863 | 2.6E-21 | P1-1 |
| Igf1     | 5.2E-27 | -0.735 | 0.66  | 0.789 | 7.5E-23 | P1-2 |
| Col5a3   | 1.0E-16 | -0.736 | 0.694 | 0.81  | 1.5E-12 | P1-3 |
| Ifi207   | 2.4E-51 | -0.741 | 0.436 | 0.708 | 3.4E-47 | P1-1 |
| Lum      | 2.9E-17 | -0.742 | 1     | 0.99  | 4.2E-13 | P1-3 |
| Col5a3   | 9.4E-30 | -0.742 | 0.731 | 0.817 | 1.4E-25 | P1-1 |
| Lgals3bp | 8.1E-49 | -0.743 | 0.849 | 0.918 | 1.2E-44 | P1-1 |
| Thbs2    | 5.1E-24 | -0.746 | 0.568 | 0.719 | 7.4E-20 | P1-1 |
| Plod2    | 7.5E-49 | -0.747 | 0.188 | 0.501 | 1.1E-44 | P1-1 |
| Egr1     | 2.1E-22 | -0.747 | 0.962 | 0.981 | 3.0E-18 | P1-3 |
| Thy1     | 2.3E-46 | -0.751 | 0.686 | 0.885 | 3.3E-42 | P1-1 |
| Tcf4     | 1.5E-30 | -0.782 | 0.841 | 0.908 | 2.2E-26 | P1-1 |
| Tmem119  | 3.1E-60 | -0.787 | 0.172 | 0.525 | 4.5E-56 | P1-1 |
| Irf7     | 8.9E-10 | -0.794 | 0.507 | 0.573 | 1.3E-05 | P1-1 |
| Col5a3   | 1.7E-41 | -0.798 | 0.696 | 0.83  | 2.5E-37 | P1-2 |
| Col3a1   | 1.2E-43 | -0.801 | 1     | 1     | 1.8E-39 | P1-3 |
| Col1a1   | 3.3E-37 | -0.803 | 1     | 0.997 | 4.8E-33 | P1-3 |
| Isg15    | 8.0E-15 | -0.815 | 0.361 | 0.51  | 1.2E-10 | P1-1 |
| Sparc    | 9.8E-45 | -0.818 | 1     | 1     | 1.4E-40 | P1-3 |
| Jun      | 2.6E-48 | -0.833 | 0.994 | 0.995 | 3.8E-44 | P1-1 |
| Sgk1     | 5.9E-50 | -0.840 | 0.187 | 0.507 | 8.5E-46 | P1-1 |
| Neat1    | 1.5E-37 | -0.843 | 0.849 | 0.926 | 2.2E-33 | P1-2 |
| Klf9     | 7.9E-78 | -0.847 | 0.907 | 0.971 | 1.1E-73 | P1-1 |
| Srpx     | 2.5E-52 | -0.860 | 0.77  | 0.875 | 3.6E-48 | P1-2 |
| Rbp1     | 5.5E-24 | -0.925 | 0.402 | 0.644 | 7.9E-20 | P1-3 |

|          |          |        |       |       |          |      |
|----------|----------|--------|-------|-------|----------|------|
| Nrep     | 1.0E-49  | -0.939 | 0.375 | 0.643 | 1.5E-45  | P1-2 |
| Lgals1   | 1.5E-108 | -0.940 | 1     | 0.999 | 2.2E-104 | P1-1 |
| Adh1     | 1.4E-57  | -0.946 | 0.224 | 0.553 | 2.0E-53  | P1-1 |
| Cd9      | 3.8E-24  | -0.950 | 0.436 | 0.698 | 5.6E-20  | P1-3 |
| Tnfaip6  | 2.5E-17  | -0.958 | 0.646 | 0.822 | 3.6E-13  | P1-3 |
| Cd9      | 2.3E-44  | -0.961 | 0.488 | 0.721 | 3.3E-40  | P1-1 |
| Igfbp5   | 3.9E-16  | -0.971 | 0.619 | 0.809 | 5.6E-12  | P1-3 |
| Ifi205   | 5.4E-63  | -0.972 | 0.974 | 0.963 | 7.9E-59  | P1-1 |
| Mt1      | 1.4E-16  | -0.973 | 0.973 | 0.978 | 2.0E-12  | P1-3 |
| Sh3bgrl3 | 5.2E-68  | -0.978 | 0.816 | 0.932 | 7.6E-64  | P1-1 |
| Col6a2   | 1.1E-53  | -0.983 | 0.962 | 0.988 | 1.6E-49  | P1-3 |
| Cygb     | 2.6E-52  | -0.983 | 0.591 | 0.805 | 3.7E-48  | P1-1 |
| Gas1     | 6.2E-39  | -0.984 | 0.622 | 0.898 | 8.9E-35  | P1-3 |
| Inmt     | 1.6E-22  | -0.992 | 0.514 | 0.671 | 2.3E-18  | P1-1 |
| Angptl2  | 8.4E-35  | -0.995 | 0.708 | 0.895 | 1.2E-30  | P1-3 |
| Mmp3     | 1.1E-46  | -1.016 | 0.425 | 0.704 | 1.6E-42  | P1-1 |
| Cxcl1    | 1.1E-11  | -1.019 | 0.45  | 0.634 | 1.6E-07  | P1-3 |
| Angptl4  | 5.9E-74  | -1.044 | 0.166 | 0.559 | 8.6E-70  | P1-1 |
| Junb     | 4.0E-37  | -1.079 | 0.938 | 0.981 | 5.9E-33  | P1-3 |
| Cdkn1c   | 9.0E-24  | -1.082 | 0.426 | 0.698 | 1.3E-19  | P1-3 |
| Rbp1     | 3.2E-71  | -1.094 | 0.346 | 0.694 | 4.6E-67  | P1-1 |
| Socs3    | 4.3E-30  | -1.151 | 0.557 | 0.807 | 6.2E-26  | P1-3 |
| Col4a2   | 1.2E-21  | -1.164 | 0.581 | 0.731 | 1.8E-17  | P1-3 |
| Srpx     | 1.3E-53  | -1.187 | 0.588 | 0.88  | 2.0E-49  | P1-3 |
| Zfp36    | 6.0E-28  | -1.192 | 0.794 | 0.901 | 8.7E-24  | P1-3 |
| Spon1    | 1.7E-76  | -1.249 | 0.1   | 0.503 | 2.5E-72  | P1-1 |
| Ifi27    | 6.3E-74  | -1.293 | 0.443 | 0.87  | 9.2E-70  | P1-3 |
| Col4a1   | 2.2E-18  | -1.298 | 0.742 | 0.822 | 3.2E-14  | P1-3 |
| Nrep     | 9.5E-49  | -1.301 | 0.175 | 0.626 | 1.4E-44  | P1-3 |
| Col15a1  | 7.2E-26  | -1.309 | 0.302 | 0.561 | 1.0E-21  | P1-3 |
| Igfbp7   | 4.4E-65  | -1.330 | 0.922 | 0.954 | 6.5E-61  | P1-2 |
| Dbp      | 3.0E-127 | -1.413 | 0.279 | 0.756 | 4.3E-123 | P1-1 |
| Col4a2   | 5.3E-86  | -1.516 | 0.516 | 0.776 | 7.7E-82  | P1-2 |
| Lum      | 3.9E-165 | -1.547 | 0.969 | 0.997 | 5.6E-161 | P1-1 |
| Col15a1  | 2.7E-82  | -1.569 | 0.263 | 0.617 | 3.9E-78  | P1-2 |
| Igfbp7   | 2.5E-89  | -1.594 | 0.897 | 0.96  | 3.6E-85  | P1-1 |
| Col4a2   | 2.6E-96  | -1.639 | 0.47  | 0.782 | 3.8E-92  | P1-1 |
| Igfbp7   | 4.5E-47  | -1.646 | 0.89  | 0.953 | 6.5E-43  | P1-3 |
| Col4a1   | 5.6E-74  | -1.683 | 0.709 | 0.846 | 8.1E-70  | P1-2 |
| Sfrp2    | 1.0E-39  | -1.714 | 0.574 | 0.844 | 1.5E-35  | P1-3 |
| Col15a1  | 2.6E-108 | -1.766 | 0.156 | 0.637 | 3.7E-104 | P1-1 |
| Postn    | 1.1E-61  | -1.770 | 0.918 | 0.984 | 1.6E-57  | P1-3 |
| Col4a1   | 8.6E-110 | -1.946 | 0.614 | 0.868 | 1.2E-105 | P1-1 |
| Fabp4    | 1.9E-20  | -2.491 | 0.326 | 0.557 | 2.7E-16  | P1-3 |
| Fabp4    | 1.8E-36  | -2.655 | 0.388 | 0.578 | 2.7E-32  | P1-2 |

|          |         |        |       |       |         |         |
|----------|---------|--------|-------|-------|---------|---------|
| Fabp4    | 3.5E-49 | -2.748 | 0.327 | 0.59  | 5.1E-45 | P1-1    |
| Gas6     | 2.8E-58 | 1.955  | 0.8   | 0.303 | 4.1E-54 | P3-Areg |
| Fmo2     | 2.2E-72 | 1.928  | 0.63  | 0.147 | 3.1E-68 | P3-Areg |
| Gdf10    | 2.4E-52 | 1.839  | 0.83  | 0.415 | 3.4E-48 | P3-Areg |
| Mgp      | 3.3E-37 | 1.828  | 0.673 | 0.291 | 4.8E-33 | P3-Areg |
| Inmt     | 3.0E-31 | 1.665  | 0.885 | 0.623 | 4.3E-27 | P3-Areg |
| Igfbp7   | 3.9E-55 | 1.517  | 0.994 | 0.944 | 5.7E-51 | P3-Areg |
| Clec11a  | 3.1E-70 | 1.451  | 0.576 | 0.118 | 4.5E-66 | P3-Areg |
| Igfbp3   | 2.1E-24 | 1.422  | 0.515 | 0.214 | 3.0E-20 | P3-Areg |
| Cst3     | 5.9E-40 | 1.402  | 0.994 | 0.995 | 8.5E-36 | P3-Areg |
| Cygb     | 7.4E-46 | 1.371  | 0.982 | 0.746 | 1.1E-41 | P3-Areg |
| Nmb      | 3.9E-39 | 1.355  | 0.533 | 0.171 | 5.6E-35 | P3-Areg |
| F3       | 1.8E-43 | 1.327  | 0.509 | 0.133 | 2.6E-39 | P3-Areg |
| Steap4   | 3.2E-42 | 1.200  | 0.733 | 0.298 | 4.6E-38 | P3-Areg |
| Tgfb1    | 1.7E-24 | 1.181  | 0.624 | 0.306 | 2.5E-20 | P3-Areg |
| Cd9      | 4.7E-28 | 1.170  | 0.958 | 0.655 | 6.8E-24 | P3-Areg |
| Gadd45g  | 6.3E-14 | 1.155  | 0.867 | 0.706 | 9.1E-10 | P3-Areg |
| C2       | 3.6E-28 | 1.058  | 0.63  | 0.301 | 5.2E-24 | P3-Areg |
| Abi3bp   | 7.4E-36 | 1.035  | 0.976 | 0.828 | 1.1E-31 | P3-Areg |
| Igf1     | 1.8E-17 | 1.022  | 0.927 | 0.749 | 2.6E-13 | P3-Areg |
| Mmp3     | 9.3E-14 | 0.982  | 0.879 | 0.631 | 1.4E-09 | P3-Areg |
| Sfrp4    | 7.1E-08 | 0.969  | 0.903 | 0.699 | 1.0E-03 | P3-Areg |
| Vit      | 3.5E-72 | 0.961  | 0.545 | 0.095 | 5.0E-68 | P3-Areg |
| Ndr2     | 1.4E-24 | 0.883  | 0.521 | 0.227 | 2.0E-20 | P3-Areg |
| Gsn      | 6.2E-22 | 0.837  | 1     | 1     | 9.0E-18 | P3-Areg |
| Selenop  | 6.6E-30 | 0.833  | 0.994 | 0.966 | 9.6E-26 | P3-Areg |
| Pmp22    | 3.7E-03 | 0.819  | 0.939 | 0.896 | 1.0E+00 | P3-Areg |
| Nfib     | 3.0E-22 | 0.710  | 0.976 | 0.924 | 4.3E-18 | P3-Areg |
| Osr1     | 3.0E-11 | 0.708  | 0.848 | 0.693 | 4.3E-07 | P3-Areg |
| Cav1     | 7.0E-19 | 0.703  | 0.636 | 0.354 | 1.0E-14 | P3-Areg |
| Serpin1  | 4.1E-25 | 0.698  | 0.994 | 0.988 | 6.0E-21 | P3-Areg |
| Il11ra1  | 3.0E-23 | 0.686  | 0.994 | 0.971 | 4.3E-19 | P3-Areg |
| Sned1    | 2.5E-06 | 0.676  | 0.503 | 0.396 | 3.6E-02 | P3-Areg |
| Apod     | 1.4E-06 | 0.666  | 0.952 | 0.831 | 2.0E-02 | P3-Areg |
| Junb     | 1.2E-15 | 0.659  | 0.994 | 0.976 | 1.7E-11 | P3-Areg |
| Socs3    | 1.1E-13 | 0.632  | 0.958 | 0.772 | 1.6E-09 | P3-Areg |
| AW112010 | 6.3E-09 | 0.629  | 0.782 | 0.619 | 9.2E-05 | P3-Areg |
| Cryab    | 9.0E-13 | 0.624  | 0.842 | 0.617 | 1.3E-08 | P3-Areg |
| Fth1     | 1.8E-33 | 0.624  | 1     | 1     | 2.6E-29 | P3-Areg |
| Nrp1     | 1.1E-09 | 0.609  | 0.545 | 0.374 | 1.6E-05 | P3-Areg |
| Deptor   | 4.7E-21 | 0.594  | 0.515 | 0.225 | 6.8E-17 | P3-Areg |
| Tmeff2   | 7.3E-09 | 0.582  | 0.903 | 0.803 | 1.1E-04 | P3-Areg |
| Rbp1     | 1.8E-15 | 0.576  | 0.873 | 0.605 | 2.6E-11 | P3-Areg |
| Cd81     | 9.3E-21 | 0.563  | 0.994 | 0.997 | 1.3E-16 | P3-Areg |
| Ecm2     | 3.9E-10 | 0.555  | 0.527 | 0.356 | 5.7E-06 | P3-Areg |

|               |         |        |       |       |         |         |
|---------------|---------|--------|-------|-------|---------|---------|
| Cd302         | 9.2E-15 | 0.538  | 0.988 | 0.942 | 1.3E-10 | P3-Areg |
| Jun           | 4.1E-15 | 0.538  | 1     | 0.994 | 5.9E-11 | P3-Areg |
| Rpl22l1       | 8.1E-16 | 0.501  | 1     | 1     | 1.2E-11 | P3-Areg |
| Nmt2          | 2.4E-09 | -0.503 | 0.485 | 0.679 | 3.5E-05 | P3-Areg |
| Jpt1          | 2.0E-09 | -0.513 | 0.812 | 0.855 | 3.0E-05 | P3-Areg |
| Ccnd2         | 2.5E-08 | -0.515 | 0.636 | 0.749 | 3.6E-04 | P3-Areg |
| Lbp           | 3.2E-08 | -0.515 | 0.345 | 0.558 | 4.6E-04 | P3-Areg |
| Pdpn          | 4.4E-11 | -0.516 | 0.485 | 0.691 | 6.4E-07 | P3-Areg |
| Nfkbia        | 4.3E-04 | -0.517 | 0.927 | 0.904 | 1.0E+00 | P3-Areg |
| Ifi27l2a      | 1.8E-08 | -0.525 | 0.964 | 0.966 | 2.6E-04 | P3-Areg |
| Rps12         | 7.9E-27 | -0.527 | 1     | 1     | 1.2E-22 | P3-Areg |
| Neat1         | 9.3E-05 | -0.533 | 0.939 | 0.907 | 1.0E+00 | P3-Areg |
| 1700019D03Rik | 7.0E-12 | -0.533 | 0.23  | 0.518 | 1.0E-07 | P3-Areg |
| Ext1          | 4.2E-14 | -0.538 | 0.206 | 0.52  | 6.2E-10 | P3-Areg |
| Procr         | 2.6E-05 | -0.539 | 0.661 | 0.699 | 3.8E-01 | P3-Areg |
| Loxl2         | 8.5E-15 | -0.540 | 0.818 | 0.897 | 1.2E-10 | P3-Areg |
| Meg3          | 2.8E-09 | -0.540 | 0.594 | 0.736 | 4.0E-05 | P3-Areg |
| Fstl1         | 6.7E-21 | -0.541 | 0.988 | 0.997 | 9.7E-17 | P3-Areg |
| Bst2          | 3.0E-04 | -0.548 | 0.915 | 0.894 | 1.0E+00 | P3-Areg |
| Lsp1          | 1.0E-11 | -0.550 | 0.715 | 0.812 | 1.5E-07 | P3-Areg |
| Fndc1         | 3.5E-08 | -0.551 | 0.855 | 0.828 | 5.1E-04 | P3-Areg |
| Gfpt2         | 3.1E-06 | -0.556 | 0.521 | 0.614 | 4.5E-02 | P3-Areg |
| Metrnl        | 4.2E-12 | -0.561 | 0.794 | 0.895 | 6.1E-08 | P3-Areg |
| Tgfb2         | 1.3E-10 | -0.568 | 0.885 | 0.875 | 1.9E-06 | P3-Areg |
| Plpp3         | 3.5E-11 | -0.573 | 0.988 | 0.986 | 5.1E-07 | P3-Areg |
| Ptgis         | 6.7E-14 | -0.578 | 0.285 | 0.571 | 9.8E-10 | P3-Areg |
| Klf2          | 5.9E-06 | -0.597 | 0.891 | 0.88  | 8.6E-02 | P3-Areg |
| Zfp385a       | 3.1E-13 | -0.600 | 0.267 | 0.544 | 4.5E-09 | P3-Areg |
| H2-K1         | 4.1E-11 | -0.610 | 0.945 | 0.964 | 6.0E-07 | P3-Areg |
| Ier5          | 1.4E-07 | -0.616 | 0.364 | 0.528 | 2.1E-03 | P3-Areg |
| Npr1          | 1.1E-19 | -0.620 | 0.152 | 0.537 | 1.6E-15 | P3-Areg |
| Cotl1         | 1.6E-13 | -0.623 | 0.545 | 0.737 | 2.3E-09 | P3-Areg |
| Thy1          | 2.4E-10 | -0.630 | 0.818 | 0.844 | 3.4E-06 | P3-Areg |
| Nova1         | 2.9E-11 | -0.635 | 0.691 | 0.779 | 4.2E-07 | P3-Areg |
| Tcf4          | 1.1E-07 | -0.636 | 0.891 | 0.894 | 1.5E-03 | P3-Areg |
| Prss23        | 2.1E-12 | -0.638 | 0.848 | 0.876 | 3.0E-08 | P3-Areg |
| Irf7          | 3.2E-03 | -0.643 | 0.521 | 0.561 | 1.0E+00 | P3-Areg |
| Plat          | 3.4E-16 | -0.645 | 0.703 | 0.823 | 4.9E-12 | P3-Areg |
| Axl           | 1.7E-15 | -0.647 | 0.909 | 0.936 | 2.4E-11 | P3-Areg |
| Itih5         | 5.5E-26 | -0.663 | 0.861 | 0.976 | 8.0E-22 | P3-Areg |
| Lamb1         | 1.6E-14 | -0.664 | 0.527 | 0.717 | 2.3E-10 | P3-Areg |
| Ugdh          | 3.4E-10 | -0.683 | 0.77  | 0.799 | 5.0E-06 | P3-Areg |
| Il1r2         | 6.8E-05 | -0.687 | 0.424 | 0.529 | 9.8E-01 | P3-Areg |
| Angptl2       | 2.4E-10 | -0.692 | 0.848 | 0.878 | 3.5E-06 | P3-Areg |
| Basp1         | 3.5E-14 | -0.699 | 0.709 | 0.814 | 5.1E-10 | P3-Areg |



|         |         |        |       |       |         |         |
|---------|---------|--------|-------|-------|---------|---------|
| Tnfaip6 | 8.5E-05 | -0.701 | 0.782 | 0.806 | 1.0E+00 | P3-Areg |
| Col5a3  | 4.3E-11 | -0.704 | 0.679 | 0.806 | 6.2E-07 | P3-Areg |
| Timp3   | 2.0E-17 | -0.707 | 0.855 | 0.898 | 2.9E-13 | P3-Areg |
| Dbn1    | 1.7E-16 | -0.719 | 0.448 | 0.674 | 2.4E-12 | P3-Areg |
| Islr    | 1.3E-19 | -0.720 | 0.83  | 0.916 | 1.9E-15 | P3-Areg |
| Anxa1   | 2.3E-18 | -0.753 | 0.97  | 0.983 | 3.3E-14 | P3-Areg |
| Oaf     | 1.1E-22 | -0.769 | 0.794 | 0.923 | 1.5E-18 | P3-Areg |
| Creb5   | 6.5E-17 | -0.783 | 0.509 | 0.698 | 9.4E-13 | P3-Areg |
| Cd55    | 1.8E-12 | -0.789 | 0.339 | 0.567 | 2.6E-08 | P3-Areg |
| Igfbp6  | 1.8E-17 | -0.797 | 0.988 | 0.99  | 2.6E-13 | P3-Areg |
| Aspn    | 6.5E-18 | -0.799 | 0.673 | 0.827 | 9.5E-14 | P3-Areg |
| Maf     | 6.1E-23 | -0.802 | 0.642 | 0.831 | 8.9E-19 | P3-Areg |
| Mfap5   | 5.4E-17 | -0.814 | 0.994 | 0.984 | 7.9E-13 | P3-Areg |
| Thbs2   | 5.2E-14 | -0.835 | 0.497 | 0.699 | 7.5E-10 | P3-Areg |
| Adamts5 | 1.3E-22 | -0.853 | 0.83  | 0.929 | 1.9E-18 | P3-Areg |
| Lrrn4cl | 8.7E-15 | -0.859 | 0.624 | 0.732 | 1.3E-10 | P3-Areg |
| Sema3c  | 3.5E-09 | -0.861 | 0.545 | 0.627 | 5.1E-05 | P3-Areg |
| Loxl1   | 6.2E-40 | -0.875 | 0.945 | 0.993 | 9.0E-36 | P3-Areg |
| Emilin2 | 6.1E-24 | -0.881 | 0.758 | 0.875 | 8.9E-20 | P3-Areg |
| Fbn1    | 4.0E-24 | -0.884 | 0.927 | 0.971 | 5.8E-20 | P3-Areg |
| Gas7    | 3.4E-09 | -0.888 | 0.612 | 0.686 | 5.0E-05 | P3-Areg |
| Tmem100 | 4.8E-10 | -0.937 | 0.636 | 0.686 | 6.9E-06 | P3-Areg |
| Cdkn1c  | 1.7E-09 | -0.944 | 0.552 | 0.678 | 2.4E-05 | P3-Areg |
| Dpp4    | 5.2E-16 | -0.945 | 0.521 | 0.671 | 7.6E-12 | P3-Areg |
| Ccn1    | 5.0E-08 | -0.966 | 0.8   | 0.799 | 7.2E-04 | P3-Areg |
| Efhd1   | 7.6E-20 | -0.973 | 0.182 | 0.526 | 1.1E-15 | P3-Areg |
| Nid1    | 1.4E-43 | -0.979 | 0.97  | 0.997 | 2.0E-39 | P3-Areg |
| Fn1     | 5.3E-29 | -1.109 | 0.982 | 0.985 | 7.6E-25 | P3-Areg |
| Cd248   | 8.4E-39 | -1.133 | 0.855 | 0.964 | 1.2E-34 | P3-Areg |
| Igfbp5  | 4.5E-06 | -1.166 | 0.836 | 0.788 | 6.5E-02 | P3-Areg |
| Efemp1  | 2.7E-38 | -1.208 | 0.83  | 0.959 | 3.9E-34 | P3-Areg |
| Marcks  | 4.1E-42 | -1.215 | 0.964 | 0.988 | 6.0E-38 | P3-Areg |
| Ackr3   | 7.0E-21 | -1.329 | 0.727 | 0.786 | 1.0E-16 | P3-Areg |
| Smpd3   | 4.9E-09 | -1.669 | 0.642 | 0.667 | 7.1E-05 | P3-Areg |
| Anxa3   | 1.5E-22 | -1.680 | 0.788 | 0.841 | 2.2E-18 | P3-Areg |
| Pla1a   | 1.6E-39 | -1.707 | 0.545 | 0.816 | 2.3E-35 | P3-Areg |
| Postn   | 1.6E-44 | -1.955 | 0.939 | 0.98  | 2.3E-40 | P3-Areg |
| Pi16    | 2.1E-20 | -2.392 | 0.915 | 0.896 | 3.0E-16 | P3-Areg |
| Pclaf   | 0.0E+00 | 3.167  | 0.968 | 0.014 | 0.0E+00 | P4      |
| Top2a   | 0.0E+00 | 2.903  | 0.903 | 0.017 | 0.0E+00 | P4      |
| Birc5   | 0.0E+00 | 2.685  | 0.935 | 0.019 | 0.0E+00 | P4      |
| Cenpf   | 0.0E+00 | 2.566  | 0.823 | 0.008 | 0.0E+00 | P4      |
| Ccnb2   | 0.0E+00 | 2.343  | 0.774 | 0.01  | 0.0E+00 | P4      |
| Prc1    | 0.0E+00 | 2.278  | 0.839 | 0.007 | 0.0E+00 | P4      |
| Mki67   | 0.0E+00 | 2.193  | 0.935 | 0.006 | 0.0E+00 | P4      |

|           |          |       |       |       |          |    |
|-----------|----------|-------|-------|-------|----------|----|
| Tk1       | 0.0E+00  | 2.108 | 0.887 | 0.011 | 0.0E+00  | P4 |
| Pbk       | 0.0E+00  | 1.838 | 0.806 | 0.004 | 0.0E+00  | P4 |
| Ccna2     | 0.0E+00  | 1.796 | 0.79  | 0.006 | 0.0E+00  | P4 |
| Tpx2      | 0.0E+00  | 1.774 | 0.758 | 0.008 | 0.0E+00  | P4 |
| Mxd3      | 0.0E+00  | 1.692 | 0.774 | 0.008 | 0.0E+00  | P4 |
| Hmmr      | 0.0E+00  | 1.484 | 0.661 | 0.002 | 0.0E+00  | P4 |
| Ckap2l    | 0.0E+00  | 1.473 | 0.79  | 0.009 | 0.0E+00  | P4 |
| Pimreg    | 0.0E+00  | 1.449 | 0.694 | 0.003 | 0.0E+00  | P4 |
| Sgo1      | 0.0E+00  | 1.233 | 0.742 | 0.008 | 0.0E+00  | P4 |
| Ska1      | 0.0E+00  | 1.077 | 0.597 | 0.001 | 0.0E+00  | P4 |
| Kn11      | 0.0E+00  | 1.030 | 0.597 | 0.002 | 0.0E+00  | P4 |
| Ccnb1     | 2.9E-307 | 1.682 | 0.613 | 0.003 | 4.2E-303 | P4 |
| Sgo2a     | 1.9E-302 | 1.094 | 0.645 | 0.005 | 2.7E-298 | P4 |
| Plk1      | 7.8E-301 | 1.106 | 0.613 | 0.004 | 1.1E-296 | P4 |
| Cdca3     | 6.6E-293 | 2.365 | 0.855 | 0.016 | 9.6E-289 | P4 |
| Spc24     | 1.3E-287 | 1.837 | 0.871 | 0.018 | 1.8E-283 | P4 |
| Asf1b     | 1.5E-259 | 1.261 | 0.661 | 0.009 | 2.2E-255 | P4 |
| Melk      | 8.1E-258 | 0.860 | 0.532 | 0.003 | 1.2E-253 | P4 |
| Nuf2      | 1.2E-255 | 0.946 | 0.548 | 0.004 | 1.7E-251 | P4 |
| Cdca8     | 1.8E-253 | 1.976 | 0.903 | 0.025 | 2.7E-249 | P4 |
| Kif11     | 7.5E-249 | 1.069 | 0.581 | 0.006 | 1.1E-244 | P4 |
| Mis18bp1  | 4.0E-246 | 0.910 | 0.532 | 0.004 | 5.9E-242 | P4 |
| Kifc1     | 6.3E-245 | 1.001 | 0.613 | 0.008 | 9.1E-241 | P4 |
| Cenpe     | 1.1E-244 | 1.588 | 0.581 | 0.006 | 1.6E-240 | P4 |
| Ncaph     | 2.0E-244 | 0.766 | 0.548 | 0.005 | 2.9E-240 | P4 |
| Cenph     | 5.4E-244 | 0.857 | 0.565 | 0.006 | 7.9E-240 | P4 |
| Kif20a    | 5.8E-239 | 1.228 | 0.645 | 0.01  | 8.5E-235 | P4 |
| Rad51ap1  | 5.1E-238 | 0.970 | 0.645 | 0.01  | 7.5E-234 | P4 |
| Ckap2     | 8.3E-235 | 1.540 | 0.726 | 0.015 | 1.2E-230 | P4 |
| Aurka     | 4.3E-231 | 1.038 | 0.532 | 0.005 | 6.3E-227 | P4 |
| Kif22     | 7.8E-227 | 0.976 | 0.581 | 0.008 | 1.1E-222 | P4 |
| Cdc20     | 3.9E-225 | 2.007 | 0.742 | 0.017 | 5.6E-221 | P4 |
| Shcbp1    | 6.8E-225 | 0.803 | 0.548 | 0.006 | 9.9E-221 | P4 |
| Cdk1      | 1.6E-220 | 2.439 | 0.839 | 0.026 | 2.3E-216 | P4 |
| Racgap1   | 2.9E-218 | 1.606 | 0.71  | 0.016 | 4.3E-214 | P4 |
| Cenpm     | 1.4E-217 | 1.756 | 0.823 | 0.025 | 2.0E-213 | P4 |
| Anln      | 1.4E-201 | 1.274 | 0.694 | 0.017 | 2.1E-197 | P4 |
| Cdkn3     | 1.7E-201 | 1.340 | 0.597 | 0.011 | 2.4E-197 | P4 |
| Bub1b     | 1.1E-199 | 0.761 | 0.532 | 0.008 | 1.6E-195 | P4 |
| Mad2l1    | 3.6E-190 | 1.129 | 0.823 | 0.03  | 5.2E-186 | P4 |
| Lockd     | 2.0E-189 | 2.032 | 0.855 | 0.035 | 2.9E-185 | P4 |
| Clspn     | 6.5E-185 | 0.862 | 0.548 | 0.01  | 9.5E-181 | P4 |
| Aurkb     | 7.3E-184 | 1.408 | 0.613 | 0.015 | 1.1E-179 | P4 |
| Rrm2      | 3.5E-179 | 1.537 | 0.613 | 0.015 | 5.1E-175 | P4 |
| Arhgap11a | 4.0E-174 | 1.024 | 0.581 | 0.014 | 5.9E-170 | P4 |

|               |          |       |       |       |          |    |
|---------------|----------|-------|-------|-------|----------|----|
| Diaph3        | 2.8E-172 | 1.048 | 0.645 | 0.018 | 4.0E-168 | P4 |
| Uhrf1         | 9.6E-165 | 1.150 | 0.613 | 0.017 | 1.4E-160 | P4 |
| Cip2a         | 1.6E-164 | 0.906 | 0.581 | 0.015 | 2.3E-160 | P4 |
| Cenpn         | 3.9E-153 | 0.712 | 0.532 | 0.013 | 5.7E-149 | P4 |
| Cenpw         | 2.8E-149 | 1.370 | 0.855 | 0.048 | 4.1E-145 | P4 |
| Stmn1         | 2.8E-149 | 3.824 | 0.984 | 0.075 | 4.1E-145 | P4 |
| Gmnn          | 1.7E-146 | 1.303 | 0.71  | 0.031 | 2.4E-142 | P4 |
| Cenpq         | 1.7E-146 | 1.141 | 0.742 | 0.034 | 2.5E-142 | P4 |
| Nusap1        | 1.3E-145 | 1.956 | 0.758 | 0.038 | 1.9E-141 | P4 |
| Cks2          | 2.6E-142 | 2.784 | 0.952 | 0.072 | 3.7E-138 | P4 |
| Incenp        | 4.0E-126 | 1.264 | 0.661 | 0.032 | 5.8E-122 | P4 |
| Fbxo5         | 3.4E-111 | 0.940 | 0.532 | 0.022 | 5.0E-107 | P4 |
| Cenpa         | 5.0E-110 | 2.578 | 0.629 | 0.036 | 7.2E-106 | P4 |
| Hells         | 2.4E-107 | 1.009 | 0.548 | 0.025 | 3.5E-103 | P4 |
| Dbf4          | 1.6E-106 | 1.060 | 0.661 | 0.04  | 2.3E-102 | P4 |
| Ncapg2        | 1.1E-103 | 0.977 | 0.661 | 0.041 | 1.6E-99  | P4 |
| Ncapd2        | 1.9E-103 | 0.937 | 0.597 | 0.032 | 2.8E-99  | P4 |
| Pmf1          | 5.2E-95  | 1.305 | 0.79  | 0.071 | 7.6E-91  | P4 |
| Smc2          | 3.9E-93  | 2.065 | 0.984 | 0.133 | 5.6E-89  | P4 |
| Nrm           | 1.0E-89  | 0.940 | 0.677 | 0.052 | 1.5E-85  | P4 |
| Lmn2          | 1.1E-87  | 0.712 | 0.548 | 0.032 | 1.6E-83  | P4 |
| 4930579G24Rik | 1.2E-82  | 0.770 | 0.629 | 0.047 | 1.7E-78  | P4 |
| Tyms          | 3.0E-79  | 1.624 | 0.871 | 0.114 | 4.3E-75  | P4 |
| Nsd2          | 6.8E-73  | 0.717 | 0.565 | 0.042 | 9.9E-69  | P4 |
| Tcf19         | 1.7E-72  | 1.491 | 0.71  | 0.078 | 2.5E-68  | P4 |
| Mcm5          | 1.6E-69  | 1.070 | 0.516 | 0.039 | 2.3E-65  | P4 |
| Zfp367        | 1.5E-68  | 0.929 | 0.532 | 0.041 | 2.2E-64  | P4 |
| Pkmyt1        | 6.8E-66  | 0.724 | 0.565 | 0.049 | 9.8E-62  | P4 |
| Hmgb2         | 2.5E-65  | 3.150 | 1     | 0.26  | 3.6E-61  | P4 |
| Syce2         | 4.0E-65  | 0.800 | 0.548 | 0.046 | 5.8E-61  | P4 |
| Rrm1          | 5.9E-65  | 1.356 | 0.806 | 0.12  | 8.5E-61  | P4 |
| Rfc5          | 1.0E-62  | 0.872 | 0.677 | 0.077 | 1.4E-58  | P4 |
| Ezh2          | 8.6E-60  | 1.199 | 0.774 | 0.112 | 1.2E-55  | P4 |
| Lig1          | 1.3E-59  | 1.534 | 0.71  | 0.098 | 1.8E-55  | P4 |
| Tmpo          | 1.9E-57  | 2.025 | 0.968 | 0.251 | 2.7E-53  | P4 |
| H2afx         | 2.3E-57  | 2.172 | 0.903 | 0.198 | 3.3E-53  | P4 |
| Lmn1          | 7.8E-53  | 1.475 | 0.839 | 0.163 | 1.1E-48  | P4 |
| Smc4          | 6.1E-52  | 2.138 | 0.887 | 0.219 | 8.8E-48  | P4 |
| Hmgn2         | 9.4E-49  | 1.394 | 0.855 | 0.177 | 1.4E-44  | P4 |
| Atad2         | 1.1E-48  | 1.021 | 0.613 | 0.084 | 1.6E-44  | P4 |
| Rfc4          | 1.1E-48  | 0.800 | 0.629 | 0.085 | 1.6E-44  | P4 |
| Dnajc9        | 8.1E-48  | 1.215 | 0.839 | 0.173 | 1.2E-43  | P4 |
| Gins2         | 2.6E-47  | 1.007 | 0.677 | 0.106 | 3.7E-43  | P4 |
| Pold1         | 3.9E-47  | 0.629 | 0.516 | 0.057 | 5.6E-43  | P4 |
| H2afz         | 1.5E-44  | 2.760 | 1     | 0.595 | 2.2E-40  | P4 |

|          |         |       |       |       |         |    |
|----------|---------|-------|-------|-------|---------|----|
| Mcm3     | 3.0E-44 | 0.967 | 0.565 | 0.076 | 4.4E-40 | P4 |
| Haus4    | 3.7E-44 | 0.871 | 0.661 | 0.105 | 5.4E-40 | P4 |
| Haus8    | 7.5E-44 | 0.641 | 0.516 | 0.062 | 1.1E-39 | P4 |
| Mcm7     | 1.3E-43 | 0.989 | 0.581 | 0.084 | 1.9E-39 | P4 |
| Bok      | 3.0E-43 | 1.012 | 0.629 | 0.099 | 4.4E-39 | P4 |
| Hist1h1e | 3.5E-43 | 1.068 | 0.565 | 0.08  | 5.0E-39 | P4 |
| Ppil1    | 5.7E-43 | 0.990 | 0.79  | 0.165 | 8.3E-39 | P4 |
| Selenoh  | 8.1E-43 | 1.697 | 0.919 | 0.31  | 1.2E-38 | P4 |
| Dhfr     | 2.3E-42 | 0.870 | 0.516 | 0.065 | 3.3E-38 | P4 |
| Tuba1b   | 4.7E-41 | 2.622 | 1     | 0.928 | 6.9E-37 | P4 |
| Tubb5    | 4.3E-39 | 2.629 | 1     | 0.922 | 6.3E-35 | P4 |
| Ran      | 6.4E-39 | 1.925 | 1     | 0.821 | 9.3E-35 | P4 |
| Rangap1  | 6.6E-39 | 1.123 | 0.726 | 0.154 | 9.6E-35 | P4 |
| Rpa2     | 1.5E-38 | 1.012 | 0.629 | 0.114 | 2.2E-34 | P4 |
| Cdkn2c   | 6.2E-38 | 1.786 | 0.823 | 0.232 | 9.0E-34 | P4 |
| Usp1     | 1.7E-36 | 1.264 | 0.839 | 0.242 | 2.5E-32 | P4 |
| Mis12    | 2.8E-36 | 0.581 | 0.516 | 0.074 | 4.0E-32 | P4 |
| Mcm6     | 1.6E-35 | 1.046 | 0.597 | 0.109 | 2.3E-31 | P4 |
| Cks1b    | 6.8E-35 | 1.476 | 1     | 0.608 | 9.8E-31 | P4 |
| Dek      | 8.0E-35 | 1.903 | 1     | 0.612 | 1.2E-30 | P4 |
| Ncapd3   | 1.5E-34 | 0.789 | 0.548 | 0.09  | 2.1E-30 | P4 |
| Ptma     | 3.1E-34 | 1.523 | 1     | 0.994 | 4.6E-30 | P4 |
| H2afv    | 3.5E-34 | 2.007 | 0.984 | 0.801 | 5.0E-30 | P4 |
| Cdkn2d   | 4.8E-34 | 1.654 | 0.79  | 0.228 | 6.9E-30 | P4 |
| Hirip3   | 6.4E-34 | 0.641 | 0.516 | 0.08  | 9.2E-30 | P4 |
| Anp32b   | 7.0E-34 | 1.573 | 1     | 0.794 | 1.0E-29 | P4 |
| Nucks1   | 1.6E-33 | 1.749 | 0.968 | 0.637 | 2.3E-29 | P4 |
| Tubg1    | 2.0E-32 | 0.712 | 0.613 | 0.117 | 2.9E-28 | P4 |
| Rad21    | 3.4E-32 | 1.345 | 0.871 | 0.343 | 4.9E-28 | P4 |
| Mis18a   | 8.0E-32 | 0.667 | 0.548 | 0.097 | 1.2E-27 | P4 |
| Dnmt1    | 8.3E-32 | 0.800 | 0.581 | 0.11  | 1.2E-27 | P4 |
| Mthfd2   | 2.2E-31 | 0.712 | 0.548 | 0.096 | 3.2E-27 | P4 |
| Fam111a  | 3.0E-31 | 1.171 | 0.823 | 0.262 | 4.4E-27 | P4 |
| Hmgb1    | 1.4E-30 | 1.547 | 1     | 0.886 | 2.1E-26 | P4 |
| Tubb6    | 2.3E-30 | 1.869 | 0.968 | 0.71  | 3.3E-26 | P4 |
| Dut      | 3.5E-30 | 1.377 | 0.823 | 0.273 | 5.0E-26 | P4 |
| Itgb3bp  | 2.0E-29 | 0.838 | 0.758 | 0.203 | 2.9E-25 | P4 |
| Tubb4b   | 2.7E-29 | 1.894 | 0.919 | 0.454 | 3.9E-25 | P4 |
| Fxn      | 3.0E-29 | 0.575 | 0.581 | 0.11  | 4.4E-25 | P4 |
| Cmc2     | 6.8E-29 | 1.135 | 0.839 | 0.28  | 9.8E-25 | P4 |
| Lsm2     | 1.3E-28 | 1.156 | 0.887 | 0.346 | 1.9E-24 | P4 |
| Ccdc34   | 1.4E-28 | 1.506 | 0.887 | 0.405 | 2.0E-24 | P4 |
| Rfc2     | 2.0E-28 | 1.236 | 0.79  | 0.264 | 2.9E-24 | P4 |
| Snrpd1   | 2.5E-28 | 0.981 | 0.855 | 0.289 | 3.7E-24 | P4 |
| Rfc3     | 4.7E-28 | 0.768 | 0.516 | 0.098 | 6.8E-24 | P4 |

|         |         |        |       |       |         |    |
|---------|---------|--------|-------|-------|---------|----|
| Dctpp1  | 5.4E-28 | 1.243  | 0.839 | 0.311 | 7.8E-24 | P4 |
| Hat1    | 2.1E-27 | 0.947  | 0.677 | 0.184 | 3.1E-23 | P4 |
| Ssrp1   | 4.6E-27 | 1.249  | 0.919 | 0.448 | 6.6E-23 | P4 |
| Hjurp   | 1.3E-26 | 0.986  | 0.677 | 0.185 | 1.9E-22 | P4 |
| Hnrnpab | 1.4E-26 | 1.213  | 0.968 | 0.682 | 2.0E-22 | P4 |
| Dtymk   | 1.8E-26 | 0.971  | 0.806 | 0.28  | 2.6E-22 | P4 |
| Lbr     | 4.9E-26 | 0.733  | 0.548 | 0.117 | 7.2E-22 | P4 |
| Anp32e  | 6.5E-26 | 1.120  | 0.855 | 0.364 | 9.4E-22 | P4 |
| Slfn5   | 7.6E-26 | -1.732 | 0.274 | 0.903 | 1.1E-21 | P4 |
| Pcna    | 2.4E-25 | 1.894  | 0.774 | 0.311 | 3.5E-21 | P4 |
| Tagln2  | 6.5E-25 | 1.345  | 0.984 | 0.773 | 9.4E-21 | P4 |
| Cdca4   | 1.5E-24 | 0.566  | 0.532 | 0.111 | 2.1E-20 | P4 |
| Hint1   | 1.5E-24 | 0.877  | 1     | 0.988 | 2.2E-20 | P4 |
| Ywhah   | 1.3E-23 | 1.319  | 0.919 | 0.573 | 1.9E-19 | P4 |
| Alyref  | 4.0E-23 | 1.076  | 0.823 | 0.347 | 5.7E-19 | P4 |
| Rpa1    | 4.8E-23 | 0.805  | 0.548 | 0.133 | 6.9E-19 | P4 |
| Cox7a2  | 6.1E-23 | 0.947  | 1     | 0.966 | 8.8E-19 | P4 |
| Tpm4    | 8.0E-23 | 1.174  | 1     | 0.813 | 1.2E-18 | P4 |
| H1fx    | 9.5E-23 | 0.766  | 0.629 | 0.168 | 1.4E-18 | P4 |
| Calm2   | 1.1E-22 | 1.363  | 1     | 0.955 | 1.5E-18 | P4 |
| Tipin   | 1.8E-22 | 0.984  | 0.806 | 0.318 | 2.6E-18 | P4 |
| Ppia    | 2.1E-22 | 1.015  | 1     | 0.989 | 3.1E-18 | P4 |
| Mrpl18  | 2.3E-22 | 0.964  | 0.919 | 0.553 | 3.3E-18 | P4 |
| Terf1   | 6.8E-22 | 0.543  | 0.548 | 0.13  | 9.9E-18 | P4 |
| Banf1   | 8.3E-22 | 0.948  | 0.935 | 0.514 | 1.2E-17 | P4 |
| Ogn     | 9.1E-22 | -1.748 | 0.806 | 0.954 | 1.3E-17 | P4 |
| Psip1   | 1.4E-21 | 1.029  | 0.871 | 0.403 | 2.0E-17 | P4 |
| Gemin6  | 1.8E-21 | 0.567  | 0.516 | 0.118 | 2.7E-17 | P4 |
| Hpf1    | 2.2E-21 | 0.941  | 0.726 | 0.273 | 3.2E-17 | P4 |
| Exosc8  | 5.9E-21 | 0.766  | 0.726 | 0.247 | 8.5E-17 | P4 |
| Nxt1    | 6.3E-21 | 0.912  | 0.677 | 0.217 | 9.2E-17 | P4 |
| Ranbp1  | 6.4E-21 | 1.425  | 0.952 | 0.815 | 9.3E-17 | P4 |
| Nap1l1  | 1.4E-20 | 1.014  | 0.968 | 0.619 | 2.0E-16 | P4 |
| Ncaph2  | 1.9E-20 | 0.888  | 0.758 | 0.3   | 2.8E-16 | P4 |
| Wee1    | 2.4E-20 | 0.803  | 0.726 | 0.243 | 3.5E-16 | P4 |
| Vdac1   | 3.9E-20 | 0.971  | 0.968 | 0.574 | 5.7E-16 | P4 |
| Nudt21  | 4.7E-20 | 0.806  | 0.871 | 0.415 | 6.9E-16 | P4 |
| Bub3    | 6.1E-20 | 1.006  | 0.839 | 0.416 | 8.9E-16 | P4 |
| Nasp    | 1.1E-19 | 0.930  | 0.597 | 0.183 | 1.7E-15 | P4 |
| Srsf3   | 1.2E-19 | 0.970  | 0.968 | 0.794 | 1.8E-15 | P4 |
| Tuba1c  | 1.3E-19 | 1.475  | 0.613 | 0.212 | 1.8E-15 | P4 |
| Srsf7   | 1.3E-19 | 0.917  | 0.871 | 0.475 | 1.9E-15 | P4 |
| Cbx5    | 1.8E-19 | 0.948  | 0.823 | 0.383 | 2.5E-15 | P4 |
| Acot7   | 2.1E-19 | 0.684  | 0.581 | 0.157 | 3.0E-15 | P4 |
| Snrpg   | 3.0E-19 | 0.669  | 1     | 0.975 | 4.4E-15 | P4 |

|          |         |        |       |       |         |    |
|----------|---------|--------|-------|-------|---------|----|
| Mrpl51   | 3.0E-19 | 0.891  | 0.887 | 0.596 | 4.4E-15 | P4 |
| Eri1     | 3.4E-19 | 0.578  | 0.532 | 0.136 | 4.9E-15 | P4 |
| Stub1    | 3.7E-19 | 0.865  | 1     | 0.742 | 5.3E-15 | P4 |
| Larp7    | 6.8E-19 | 0.772  | 0.823 | 0.33  | 9.9E-15 | P4 |
| Pcnt     | 8.4E-19 | 0.645  | 0.565 | 0.158 | 1.2E-14 | P4 |
| Rbbp7    | 9.8E-19 | 0.842  | 0.935 | 0.574 | 1.4E-14 | P4 |
| Bex3     | 1.5E-18 | 1.044  | 0.774 | 0.341 | 2.1E-14 | P4 |
| Ssna1    | 1.5E-18 | 0.846  | 0.887 | 0.473 | 2.2E-14 | P4 |
| Hmgn1    | 1.7E-18 | 0.797  | 1     | 0.966 | 2.4E-14 | P4 |
| Gjc1     | 1.8E-18 | 0.847  | 0.629 | 0.205 | 2.6E-14 | P4 |
| Cycs     | 2.4E-18 | 0.891  | 0.823 | 0.425 | 3.5E-14 | P4 |
| Nsmce1   | 2.5E-18 | 0.777  | 0.823 | 0.363 | 3.6E-14 | P4 |
| Fxyd6    | 3.1E-18 | 0.665  | 0.581 | 0.163 | 4.6E-14 | P4 |
| Ckap4    | 3.4E-18 | 1.086  | 0.952 | 0.853 | 4.9E-14 | P4 |
| Sephs1   | 5.4E-18 | 0.503  | 0.532 | 0.142 | 7.8E-14 | P4 |
| Dpep1    | 1.3E-17 | -1.147 | 0.823 | 0.977 | 1.9E-13 | P4 |
| Fmr1     | 1.3E-17 | 0.556  | 0.661 | 0.21  | 1.9E-13 | P4 |
| Cep57    | 2.6E-17 | 0.592  | 0.565 | 0.167 | 3.8E-13 | P4 |
| Siva1    | 2.7E-17 | 1.222  | 0.806 | 0.405 | 4.0E-13 | P4 |
| Kpnb1    | 3.1E-17 | 0.806  | 0.79  | 0.366 | 4.5E-13 | P4 |
| Prdx4    | 3.7E-17 | 1.034  | 0.903 | 0.608 | 5.4E-13 | P4 |
| Lsm5     | 4.4E-17 | 0.835  | 0.887 | 0.478 | 6.3E-13 | P4 |
| Vars     | 9.9E-17 | 0.645  | 0.565 | 0.176 | 1.4E-12 | P4 |
| Pradc1   | 1.1E-16 | 0.579  | 0.548 | 0.166 | 1.6E-12 | P4 |
| Xpo1     | 1.4E-16 | 0.590  | 0.597 | 0.195 | 2.1E-12 | P4 |
| Pold2    | 1.5E-16 | 0.589  | 0.532 | 0.158 | 2.2E-12 | P4 |
| Rnase4   | 1.7E-16 | -0.839 | 0.919 | 0.997 | 2.5E-12 | P4 |
| Smc6     | 1.8E-16 | 0.925  | 0.903 | 0.687 | 2.6E-12 | P4 |
| Rnaseh2c | 2.7E-16 | 0.761  | 0.871 | 0.464 | 4.0E-12 | P4 |
| Tmx2     | 3.1E-16 | 0.505  | 0.581 | 0.18  | 4.4E-12 | P4 |
| Hdgf     | 3.5E-16 | 1.070  | 0.984 | 0.741 | 5.1E-12 | P4 |
| Tmem107  | 3.9E-16 | 0.737  | 0.726 | 0.308 | 5.7E-12 | P4 |
| Arpin    | 4.9E-16 | 0.555  | 0.532 | 0.157 | 7.1E-12 | P4 |
| Gpsm2    | 5.0E-16 | 0.723  | 0.597 | 0.202 | 7.2E-12 | P4 |
| Timm50   | 6.6E-16 | 0.558  | 0.677 | 0.235 | 9.5E-12 | P4 |
| Rnaseh2b | 7.8E-16 | 0.592  | 0.581 | 0.184 | 1.1E-11 | P4 |
| Lsm6     | 8.4E-16 | 0.818  | 0.871 | 0.569 | 1.2E-11 | P4 |
| Jade1    | 9.5E-16 | 0.610  | 0.516 | 0.151 | 1.4E-11 | P4 |
| Tfdp1    | 1.1E-15 | 0.754  | 0.645 | 0.25  | 1.5E-11 | P4 |
| Phgdh    | 1.2E-15 | 0.736  | 0.565 | 0.19  | 1.7E-11 | P4 |
| Nde1     | 1.2E-15 | 0.593  | 0.516 | 0.158 | 1.8E-11 | P4 |
| Snrpa1   | 1.4E-15 | 0.657  | 0.742 | 0.31  | 2.0E-11 | P4 |
| Ddx39b   | 1.6E-15 | 0.802  | 0.871 | 0.464 | 2.3E-11 | P4 |
| Snrpb    | 1.6E-15 | 0.710  | 1     | 0.895 | 2.3E-11 | P4 |
| Orc6     | 2.5E-15 | 0.661  | 0.613 | 0.224 | 3.6E-11 | P4 |

|               |         |        |       |       |         |    |
|---------------|---------|--------|-------|-------|---------|----|
| Gstm1         | 2.6E-15 | -1.073 | 0.71  | 0.961 | 3.8E-11 | P4 |
| Ppm1g         | 2.9E-15 | 0.714  | 0.694 | 0.3   | 4.2E-11 | P4 |
| Timp2         | 3.5E-15 | -0.958 | 0.984 | 0.998 | 5.1E-11 | P4 |
| Lmf2          | 3.8E-15 | 0.682  | 0.645 | 0.248 | 5.5E-11 | P4 |
| Nudc          | 4.2E-15 | 0.880  | 0.887 | 0.58  | 6.1E-11 | P4 |
| Naa50         | 4.5E-15 | 0.846  | 0.806 | 0.426 | 6.5E-11 | P4 |
| Uchl5         | 4.8E-15 | 0.538  | 0.565 | 0.181 | 7.0E-11 | P4 |
| Fabp5         | 5.7E-15 | 0.872  | 0.532 | 0.168 | 8.2E-11 | P4 |
| Set           | 8.4E-15 | 0.867  | 0.887 | 0.596 | 1.2E-10 | P4 |
| Gm1673        | 1.5E-14 | 0.765  | 0.677 | 0.296 | 2.1E-10 | P4 |
| Lgals1        | 1.7E-14 | 0.693  | 0.968 | 1     | 2.4E-10 | P4 |
| Hsp90aa1      | 1.7E-14 | 0.857  | 1     | 0.909 | 2.5E-10 | P4 |
| Ptges3        | 1.7E-14 | 0.717  | 0.919 | 0.584 | 2.5E-10 | P4 |
| Idh2          | 2.2E-14 | 0.754  | 0.758 | 0.367 | 3.1E-10 | P4 |
| Slc25a5       | 2.3E-14 | 1.069  | 0.984 | 0.896 | 3.4E-10 | P4 |
| Ube2e3        | 2.4E-14 | 0.669  | 0.855 | 0.441 | 3.5E-10 | P4 |
| Cbfb          | 2.4E-14 | 0.735  | 0.71  | 0.321 | 3.5E-10 | P4 |
| Acp1          | 3.3E-14 | 0.674  | 0.871 | 0.475 | 4.7E-10 | P4 |
| Dpt           | 3.4E-14 | -0.821 | 0.935 | 0.999 | 4.9E-10 | P4 |
| Hspa8         | 4.2E-14 | 0.688  | 1     | 0.993 | 6.2E-10 | P4 |
| Itm2b         | 4.5E-14 | -0.670 | 0.984 | 1     | 6.5E-10 | P4 |
| Plp2          | 5.8E-14 | 0.865  | 0.774 | 0.441 | 8.4E-10 | P4 |
| Pcbp2         | 5.8E-14 | 0.644  | 1     | 0.952 | 8.4E-10 | P4 |
| Pgp           | 5.8E-14 | 0.748  | 0.758 | 0.415 | 8.5E-10 | P4 |
| H3f3a         | 6.7E-14 | 0.707  | 1     | 0.996 | 9.8E-10 | P4 |
| Snrpe         | 6.9E-14 | 0.794  | 0.952 | 0.857 | 1.0E-09 | P4 |
| Gins4         | 7.2E-14 | 0.573  | 0.629 | 0.238 | 1.1E-09 | P4 |
| Actn4         | 9.8E-14 | 0.759  | 0.839 | 0.502 | 1.4E-09 | P4 |
| Snrnp40       | 1.0E-13 | 0.657  | 0.613 | 0.24  | 1.5E-09 | P4 |
| 1810037117Rik | 1.2E-13 | 0.969  | 0.968 | 0.838 | 1.8E-09 | P4 |
| Smchd1        | 1.3E-13 | 0.542  | 0.726 | 0.3   | 1.9E-09 | P4 |
| Smc1a         | 1.5E-13 | 0.779  | 0.806 | 0.443 | 2.1E-09 | P4 |
| Cox5a         | 1.5E-13 | 0.682  | 0.984 | 0.815 | 2.2E-09 | P4 |
| Nsmce4a       | 1.7E-13 | 0.710  | 0.806 | 0.427 | 2.5E-09 | P4 |
| Cdk4          | 1.7E-13 | 0.788  | 0.968 | 0.744 | 2.5E-09 | P4 |
| H2-Q7         | 1.7E-13 | 0.767  | 0.565 | 0.19  | 2.5E-09 | P4 |
| Ctsl          | 1.8E-13 | -0.791 | 0.952 | 0.997 | 2.7E-09 | P4 |
| Serping1      | 2.0E-13 | -1.074 | 0.887 | 0.99  | 2.9E-09 | P4 |
| Impdh2        | 2.1E-13 | 0.659  | 0.887 | 0.582 | 3.1E-09 | P4 |
| Rpa3          | 4.0E-13 | 0.714  | 0.742 | 0.371 | 5.8E-09 | P4 |
| Anapc5        | 4.1E-13 | 0.768  | 0.903 | 0.671 | 6.0E-09 | P4 |
| Snrpf         | 4.3E-13 | 0.653  | 1     | 0.905 | 6.3E-09 | P4 |
| Ybx1          | 5.9E-13 | 0.513  | 1     | 1     | 8.5E-09 | P4 |
| Errfi1        | 6.2E-13 | -1.379 | 0.435 | 0.776 | 9.0E-09 | P4 |
| Nubp1         | 7.7E-13 | 0.514  | 0.532 | 0.186 | 1.1E-08 | P4 |

|          |         |        |       |       |         |    |
|----------|---------|--------|-------|-------|---------|----|
| Dcn      | 8.3E-13 | -0.743 | 0.968 | 1     | 1.2E-08 | P4 |
| Nfyb     | 8.7E-13 | 0.520  | 0.532 | 0.179 | 1.3E-08 | P4 |
| Tcof1    | 1.0E-12 | 0.543  | 0.581 | 0.212 | 1.5E-08 | P4 |
| Pole3    | 1.1E-12 | 0.644  | 0.758 | 0.385 | 1.6E-08 | P4 |
| Clec3b   | 1.1E-12 | -0.991 | 0.903 | 0.979 | 1.6E-08 | P4 |
| Arpp19   | 1.4E-12 | 0.777  | 0.952 | 0.794 | 2.1E-08 | P4 |
| C1s1     | 1.8E-12 | -0.769 | 0.887 | 0.978 | 2.6E-08 | P4 |
| Hnrnpd   | 2.0E-12 | 0.805  | 0.758 | 0.429 | 2.9E-08 | P4 |
| Nop56    | 2.0E-12 | 0.504  | 0.613 | 0.235 | 3.0E-08 | P4 |
| Srrt     | 2.1E-12 | 0.517  | 0.581 | 0.217 | 3.0E-08 | P4 |
| H3f3b    | 2.3E-12 | 0.967  | 1     | 0.997 | 3.4E-08 | P4 |
| Eny2     | 2.5E-12 | 0.779  | 0.903 | 0.688 | 3.7E-08 | P4 |
| Mapre1   | 2.9E-12 | 0.790  | 0.952 | 0.688 | 4.2E-08 | P4 |
| Emp2     | 3.4E-12 | 0.658  | 0.565 | 0.217 | 4.9E-08 | P4 |
| Ypel3    | 3.6E-12 | -0.841 | 0.597 | 0.875 | 5.2E-08 | P4 |
| Nelfe    | 3.6E-12 | 0.598  | 0.581 | 0.226 | 5.3E-08 | P4 |
| Nupr1    | 4.2E-12 | -0.915 | 0.742 | 0.963 | 6.0E-08 | P4 |
| Tceal9   | 4.9E-12 | 0.701  | 1     | 0.956 | 7.1E-08 | P4 |
| Nono     | 6.4E-12 | 0.627  | 0.823 | 0.47  | 9.3E-08 | P4 |
| Clic1    | 7.5E-12 | 0.721  | 0.952 | 0.922 | 1.1E-07 | P4 |
| Lsm8     | 7.9E-12 | 0.730  | 0.742 | 0.424 | 1.1E-07 | P4 |
| Htra3    | 7.9E-12 | -0.831 | 0.742 | 0.971 | 1.1E-07 | P4 |
| Mzt1     | 8.6E-12 | 0.520  | 0.597 | 0.242 | 1.3E-07 | P4 |
| Anapc11  | 8.7E-12 | 0.744  | 0.903 | 0.782 | 1.3E-07 | P4 |
| Fcgrt    | 9.4E-12 | -0.729 | 0.823 | 0.975 | 1.4E-07 | P4 |
| Myh9     | 9.4E-12 | 0.631  | 0.661 | 0.305 | 1.4E-07 | P4 |
| Cfl1     | 1.1E-11 | 0.662  | 1     | 0.97  | 1.6E-07 | P4 |
| Maz      | 1.1E-11 | 0.638  | 0.629 | 0.287 | 1.6E-07 | P4 |
| Klf4     | 1.4E-11 | -1.172 | 0.774 | 0.965 | 2.1E-07 | P4 |
| Arl6ip1  | 1.5E-11 | 1.747  | 0.839 | 0.725 | 2.1E-07 | P4 |
| Srsf1    | 1.6E-11 | 0.625  | 0.677 | 0.336 | 2.4E-07 | P4 |
| Tpm3     | 1.6E-11 | 0.708  | 0.935 | 0.716 | 2.4E-07 | P4 |
| Stip1    | 1.8E-11 | 0.540  | 0.597 | 0.237 | 2.6E-07 | P4 |
| Rbbp4    | 2.1E-11 | 0.680  | 0.806 | 0.47  | 3.0E-07 | P4 |
| Cebpd    | 3.1E-11 | -1.048 | 0.613 | 0.929 | 4.5E-07 | P4 |
| Zfp91    | 3.2E-11 | 0.661  | 0.823 | 0.501 | 4.6E-07 | P4 |
| Ptms     | 3.8E-11 | 0.754  | 0.984 | 0.933 | 5.5E-07 | P4 |
| Raly     | 3.9E-11 | 0.507  | 0.565 | 0.218 | 5.6E-07 | P4 |
| Lyar     | 4.5E-11 | 0.655  | 0.677 | 0.349 | 6.5E-07 | P4 |
| Fkbp2    | 5.2E-11 | 0.774  | 0.871 | 0.698 | 7.5E-07 | P4 |
| Lmna     | 5.4E-11 | 0.697  | 0.903 | 0.632 | 7.8E-07 | P4 |
| Eif1ad   | 5.5E-11 | 0.530  | 0.548 | 0.216 | 7.9E-07 | P4 |
| Rarres2  | 6.5E-11 | -0.678 | 0.935 | 0.995 | 9.4E-07 | P4 |
| Map1lc3b | 9.5E-11 | -0.672 | 0.887 | 0.967 | 1.4E-06 | P4 |
| Hnrnpu   | 9.7E-11 | 0.573  | 0.726 | 0.361 | 1.4E-06 | P4 |



|          |         |        |       |       |         |    |
|----------|---------|--------|-------|-------|---------|----|
| Ak6      | 9.9E-11 | 0.501  | 0.581 | 0.242 | 1.4E-06 | P4 |
| Ahnak2   | 1.0E-10 | -0.945 | 0.29  | 0.697 | 1.5E-06 | P4 |
| Trim28   | 1.4E-10 | 0.551  | 0.758 | 0.383 | 2.0E-06 | P4 |
| Hp1bp3   | 1.4E-10 | 0.741  | 0.758 | 0.463 | 2.0E-06 | P4 |
| Aldoa    | 1.4E-10 | -0.708 | 0.758 | 0.956 | 2.1E-06 | P4 |
| Selenop  | 1.5E-10 | -0.865 | 0.855 | 0.97  | 2.2E-06 | P4 |
| Eloc     | 1.5E-10 | 0.629  | 0.935 | 0.71  | 2.2E-06 | P4 |
| Mxd4     | 1.6E-10 | -0.721 | 0.5   | 0.872 | 2.4E-06 | P4 |
| Erh      | 1.8E-10 | 0.715  | 0.774 | 0.48  | 2.6E-06 | P4 |
| Hnrnpr   | 1.8E-10 | 0.653  | 0.774 | 0.46  | 2.7E-06 | P4 |
| Ipo5     | 1.9E-10 | 0.529  | 0.629 | 0.278 | 2.7E-06 | P4 |
| Brd8     | 1.9E-10 | 0.537  | 0.597 | 0.25  | 2.7E-06 | P4 |
| Ppp1ca   | 2.3E-10 | 0.552  | 0.984 | 0.925 | 3.3E-06 | P4 |
| Tra2b    | 2.8E-10 | 0.634  | 0.919 | 0.725 | 4.0E-06 | P4 |
| Actb     | 2.9E-10 | 0.855  | 1     | 0.999 | 4.1E-06 | P4 |
| Cd302    | 2.9E-10 | -0.749 | 0.742 | 0.949 | 4.2E-06 | P4 |
| Atpif1   | 2.9E-10 | 0.588  | 1     | 0.959 | 4.2E-06 | P4 |
| Ptbp1    | 3.0E-10 | 0.554  | 0.79  | 0.413 | 4.3E-06 | P4 |
| Cnot6l   | 3.2E-10 | 0.526  | 0.71  | 0.352 | 4.7E-06 | P4 |
| Mmp2     | 4.0E-10 | -0.686 | 0.823 | 0.971 | 5.7E-06 | P4 |
| Mrps25   | 4.3E-10 | 0.530  | 0.758 | 0.38  | 6.3E-06 | P4 |
| Tcerg1   | 4.4E-10 | 0.511  | 0.597 | 0.27  | 6.4E-06 | P4 |
| Pih1d1   | 5.3E-10 | 0.556  | 0.661 | 0.308 | 7.7E-06 | P4 |
| Aarsd1   | 5.3E-10 | 0.701  | 0.629 | 0.307 | 7.7E-06 | P4 |
| Csrp1    | 5.3E-10 | 0.680  | 0.613 | 0.29  | 7.8E-06 | P4 |
| U2af1    | 5.7E-10 | 0.694  | 0.839 | 0.55  | 8.2E-06 | P4 |
| Cnih4    | 5.9E-10 | 0.594  | 0.806 | 0.479 | 8.5E-06 | P4 |
| Gkap1    | 6.5E-10 | 0.597  | 0.645 | 0.303 | 9.4E-06 | P4 |
| G3bp1    | 7.3E-10 | 0.754  | 0.823 | 0.543 | 1.1E-05 | P4 |
| Zbtb20   | 9.0E-10 | -0.553 | 0.935 | 0.999 | 1.3E-05 | P4 |
| Nid1     | 1.0E-09 | -0.652 | 0.952 | 0.997 | 1.4E-05 | P4 |
| Srsf2    | 1.2E-09 | 0.676  | 0.903 | 0.76  | 1.7E-05 | P4 |
| Gtf2a2   | 1.2E-09 | 0.587  | 0.855 | 0.54  | 1.8E-05 | P4 |
| Dazap1   | 1.2E-09 | 0.517  | 0.774 | 0.437 | 1.8E-05 | P4 |
| Nans     | 1.2E-09 | 0.575  | 0.677 | 0.364 | 1.8E-05 | P4 |
| Dpy30    | 1.3E-09 | 0.558  | 0.71  | 0.4   | 1.9E-05 | P4 |
| Psma4    | 1.4E-09 | 0.604  | 0.887 | 0.764 | 2.0E-05 | P4 |
| Ndufb8   | 1.6E-09 | 0.569  | 0.935 | 0.78  | 2.3E-05 | P4 |
| Pcolce2  | 1.6E-09 | -1.055 | 0.726 | 0.926 | 2.3E-05 | P4 |
| Aspn     | 1.7E-09 | -0.982 | 0.581 | 0.824 | 2.4E-05 | P4 |
| Hnrnpul1 | 1.7E-09 | 0.512  | 0.758 | 0.419 | 2.5E-05 | P4 |
| Actg1    | 1.7E-09 | 0.646  | 1     | 0.98  | 2.5E-05 | P4 |
| Tnxb     | 1.9E-09 | -0.771 | 0.71  | 0.921 | 2.7E-05 | P4 |
| Crip1    | 1.9E-09 | 0.548  | 0.984 | 0.998 | 2.8E-05 | P4 |
| Rbm8a    | 2.0E-09 | 0.507  | 0.855 | 0.605 | 2.8E-05 | P4 |

|          |         |        |       |       |         |    |
|----------|---------|--------|-------|-------|---------|----|
| Pfn1     | 2.0E-09 | 0.539  | 0.984 | 0.985 | 2.9E-05 | P4 |
| Serpinf1 | 2.1E-09 | -0.622 | 0.952 | 0.998 | 3.0E-05 | P4 |
| Ubal2    | 2.2E-09 | 0.697  | 0.661 | 0.355 | 3.2E-05 | P4 |
| Klf9     | 2.3E-09 | -0.785 | 0.887 | 0.959 | 3.3E-05 | P4 |
| Cisd2    | 2.3E-09 | 0.578  | 0.823 | 0.509 | 3.3E-05 | P4 |
| Islr     | 2.3E-09 | -0.792 | 0.71  | 0.916 | 3.4E-05 | P4 |
| Ccdc88a  | 2.5E-09 | 0.590  | 0.71  | 0.384 | 3.6E-05 | P4 |
| C3       | 2.7E-09 | -1.050 | 0.516 | 0.779 | 3.9E-05 | P4 |
| Ciao2a   | 3.3E-09 | 0.510  | 0.742 | 0.409 | 4.8E-05 | P4 |
| Atp5o    | 3.4E-09 | 0.505  | 0.984 | 0.925 | 5.0E-05 | P4 |
| Fkbp4    | 3.5E-09 | 0.578  | 0.758 | 0.466 | 5.1E-05 | P4 |
| Mettl9   | 3.8E-09 | 0.566  | 0.855 | 0.575 | 5.6E-05 | P4 |
| Plpp3    | 3.9E-09 | -0.871 | 0.839 | 0.99  | 5.7E-05 | P4 |
| Eif4e    | 4.2E-09 | 0.532  | 0.629 | 0.319 | 6.1E-05 | P4 |
| Cntln    | 4.3E-09 | 0.599  | 0.581 | 0.278 | 6.3E-05 | P4 |
| Zfp36l1  | 4.8E-09 | -0.873 | 0.645 | 0.89  | 6.9E-05 | P4 |
| Prdx6    | 4.9E-09 | -0.703 | 0.742 | 0.914 | 7.1E-05 | P4 |
| Mrpl14   | 5.1E-09 | 0.591  | 0.839 | 0.666 | 7.4E-05 | P4 |
| Cby1     | 6.1E-09 | 0.515  | 0.532 | 0.244 | 8.8E-05 | P4 |
| Acadl    | 6.2E-09 | 0.502  | 0.758 | 0.423 | 9.0E-05 | P4 |
| Fth1     | 6.3E-09 | -0.538 | 1     | 1     | 9.1E-05 | P4 |
| Txn11    | 6.9E-09 | 0.622  | 0.79  | 0.54  | 1.0E-04 | P4 |
| Lims1    | 7.0E-09 | 0.606  | 0.774 | 0.468 | 1.0E-04 | P4 |
| Gapdh    | 7.2E-09 | 0.588  | 1     | 0.931 | 1.0E-04 | P4 |
| Meg3     | 7.4E-09 | -0.828 | 0.435 | 0.735 | 1.1E-04 | P4 |
| Inmt     | 7.4E-09 | -1.707 | 0.339 | 0.644 | 1.1E-04 | P4 |
| Tomm40   | 9.6E-09 | 0.573  | 0.613 | 0.327 | 1.4E-04 | P4 |
| Actr3    | 1.0E-08 | 0.627  | 0.871 | 0.627 | 1.5E-04 | P4 |
| Scara5   | 1.1E-08 | -0.895 | 0.452 | 0.806 | 1.6E-04 | P4 |
| Smarca5  | 1.3E-08 | 0.616  | 0.726 | 0.47  | 1.8E-04 | P4 |
| Timp3    | 1.4E-08 | -0.795 | 0.677 | 0.901 | 2.0E-04 | P4 |
| Tcp1     | 1.4E-08 | 0.560  | 0.887 | 0.598 | 2.1E-04 | P4 |
| Txndc12  | 1.4E-08 | 0.550  | 0.661 | 0.368 | 2.1E-04 | P4 |
| Phf5a    | 1.6E-08 | 0.535  | 0.726 | 0.404 | 2.2E-04 | P4 |
| Calm3    | 1.7E-08 | 0.561  | 0.823 | 0.608 | 2.5E-04 | P4 |
| Ywhae    | 2.0E-08 | 0.527  | 0.984 | 0.943 | 2.8E-04 | P4 |
| Ppp4c    | 2.0E-08 | 0.504  | 0.694 | 0.406 | 2.9E-04 | P4 |
| Tpr      | 2.0E-08 | 0.552  | 0.903 | 0.684 | 3.0E-04 | P4 |
| Prdx5    | 2.2E-08 | -0.635 | 0.839 | 0.937 | 3.2E-04 | P4 |
| Sult5a1  | 2.3E-08 | -0.853 | 0.274 | 0.613 | 3.3E-04 | P4 |
| Lsm4     | 2.6E-08 | 0.589  | 0.855 | 0.623 | 3.8E-04 | P4 |
| Uqcr10   | 2.7E-08 | 0.506  | 1     | 0.961 | 3.8E-04 | P4 |
| Rfc1     | 2.7E-08 | 0.710  | 0.629 | 0.389 | 3.9E-04 | P4 |
| Psmc4    | 2.8E-08 | 0.543  | 0.742 | 0.47  | 4.1E-04 | P4 |
| Ndufa5   | 3.0E-08 | 0.505  | 0.952 | 0.859 | 4.3E-04 | P4 |

|          |         |        |       |       |         |    |
|----------|---------|--------|-------|-------|---------|----|
| Txnip    | 3.0E-08 | -0.834 | 0.5   | 0.766 | 4.4E-04 | P4 |
| Prss23   | 3.1E-08 | -0.855 | 0.645 | 0.88  | 4.4E-04 | P4 |
| Smc3     | 3.2E-08 | 0.546  | 0.742 | 0.463 | 4.6E-04 | P4 |
| Ift74    | 3.8E-08 | 0.540  | 0.532 | 0.256 | 5.5E-04 | P4 |
| Pi16     | 3.9E-08 | -1.842 | 0.726 | 0.901 | 5.7E-04 | P4 |
| Txn1     | 4.1E-08 | 0.530  | 1     | 0.997 | 5.9E-04 | P4 |
| Thoc7    | 4.8E-08 | 0.562  | 0.839 | 0.66  | 6.9E-04 | P4 |
| Timp1    | 5.1E-08 | 1.052  | 0.677 | 0.41  | 7.4E-04 | P4 |
| C1ra     | 5.4E-08 | -0.614 | 0.774 | 0.938 | 7.9E-04 | P4 |
| Dynlt1f  | 5.9E-08 | 0.585  | 0.758 | 0.472 | 8.6E-04 | P4 |
| Scaf11   | 6.1E-08 | 0.549  | 0.726 | 0.49  | 8.9E-04 | P4 |
| Hnrnpf   | 7.8E-08 | 0.626  | 0.968 | 0.803 | 1.1E-03 | P4 |
| Hprt     | 7.9E-08 | 0.548  | 0.694 | 0.403 | 1.2E-03 | P4 |
| Pdap1    | 9.4E-08 | 0.524  | 0.871 | 0.765 | 1.4E-03 | P4 |
| Paics    | 9.8E-08 | 0.512  | 0.726 | 0.452 | 1.4E-03 | P4 |
| Ifi205   | 1.0E-07 | -0.794 | 0.887 | 0.967 | 1.5E-03 | P4 |
| Tpi1     | 1.0E-07 | 0.588  | 0.839 | 0.65  | 1.5E-03 | P4 |
| Gclm     | 1.0E-07 | 0.528  | 0.532 | 0.254 | 1.5E-03 | P4 |
| Tmem109  | 1.1E-07 | 0.581  | 0.645 | 0.373 | 1.6E-03 | P4 |
| Tgfbr2   | 1.3E-07 | -0.735 | 0.726 | 0.879 | 1.9E-03 | P4 |
| Fndc1    | 1.3E-07 | -0.756 | 0.565 | 0.836 | 1.9E-03 | P4 |
| Snu13    | 1.4E-07 | 0.592  | 0.79  | 0.527 | 2.0E-03 | P4 |
| Ly6a     | 1.4E-07 | -0.810 | 0.919 | 0.975 | 2.0E-03 | P4 |
| Gstt1    | 1.6E-07 | -0.645 | 0.452 | 0.773 | 2.3E-03 | P4 |
| Syncrip  | 1.7E-07 | 0.552  | 0.645 | 0.371 | 2.4E-03 | P4 |
| Sep 07   | 1.7E-07 | 0.528  | 0.919 | 0.853 | 2.4E-03 | P4 |
| Timm17a  | 1.7E-07 | 0.517  | 0.758 | 0.48  | 2.5E-03 | P4 |
| Iqgap1   | 1.8E-07 | 0.598  | 0.774 | 0.496 | 2.6E-03 | P4 |
| Tuba1a   | 1.9E-07 | 0.536  | 1     | 0.993 | 2.8E-03 | P4 |
| Uba2     | 2.0E-07 | 0.571  | 0.645 | 0.352 | 2.9E-03 | P4 |
| H2afy    | 2.2E-07 | 0.570  | 0.758 | 0.543 | 3.1E-03 | P4 |
| Aebp1    | 2.2E-07 | -0.665 | 0.919 | 0.994 | 3.2E-03 | P4 |
| Sod3     | 2.3E-07 | -0.610 | 0.565 | 0.846 | 3.3E-03 | P4 |
| Ywhaq    | 2.4E-07 | 0.562  | 0.903 | 0.778 | 3.5E-03 | P4 |
| Hspd1    | 2.7E-07 | 0.604  | 0.79  | 0.525 | 3.9E-03 | P4 |
| Smpd3    | 2.8E-07 | -1.770 | 0.387 | 0.672 | 4.0E-03 | P4 |
| Map1lc3a | 2.8E-07 | -0.563 | 0.71  | 0.894 | 4.1E-03 | P4 |
| Ap2m1    | 3.0E-07 | 0.517  | 0.839 | 0.628 | 4.3E-03 | P4 |
| Atp5b    | 3.0E-07 | 0.513  | 1     | 0.968 | 4.4E-03 | P4 |
| Lrrn4cl  | 3.3E-07 | -0.870 | 0.484 | 0.731 | 4.7E-03 | P4 |
| Gltp     | 3.5E-07 | 0.625  | 0.694 | 0.465 | 5.1E-03 | P4 |
| Mdh2     | 3.5E-07 | 0.511  | 0.935 | 0.73  | 5.1E-03 | P4 |
| Bzw1     | 3.7E-07 | 0.502  | 0.806 | 0.538 | 5.3E-03 | P4 |
| Vdac2    | 4.5E-07 | 0.565  | 0.823 | 0.642 | 6.6E-03 | P4 |
| Ackr3    | 4.6E-07 | -0.946 | 0.565 | 0.788 | 6.7E-03 | P4 |

|               |         |        |       |       |         |    |
|---------------|---------|--------|-------|-------|---------|----|
| Sdc1          | 4.7E-07 | 0.944  | 0.532 | 0.271 | 6.9E-03 | P4 |
| Pa2g4         | 5.1E-07 | 0.532  | 0.629 | 0.373 | 7.5E-03 | P4 |
| Ace           | 5.2E-07 | -0.716 | 0.468 | 0.756 | 7.5E-03 | P4 |
| B230219D22Rik | 5.8E-07 | 0.504  | 0.839 | 0.572 | 8.4E-03 | P4 |
| Pafah1b2      | 6.0E-07 | 0.506  | 0.726 | 0.469 | 8.7E-03 | P4 |
| Gpc3          | 6.0E-07 | -0.793 | 0.516 | 0.791 | 8.7E-03 | P4 |
| Lrp1          | 6.1E-07 | -0.535 | 0.79  | 0.969 | 8.9E-03 | P4 |
| Procr         | 6.1E-07 | -0.914 | 0.419 | 0.703 | 8.9E-03 | P4 |
| Dusp1         | 6.9E-07 | -0.888 | 0.839 | 0.922 | 1.0E-02 | P4 |
| Eif4h         | 7.4E-07 | 0.543  | 0.855 | 0.675 | 1.1E-02 | P4 |
| Cct7          | 7.8E-07 | 0.565  | 0.774 | 0.583 | 1.1E-02 | P4 |
| Igfbp4        | 7.8E-07 | -0.823 | 0.871 | 0.935 | 1.1E-02 | P4 |
| Cd34          | 8.2E-07 | -0.615 | 0.823 | 0.973 | 1.2E-02 | P4 |
| Ier2          | 8.8E-07 | -0.842 | 0.887 | 0.944 | 1.3E-02 | P4 |
| Mrpl13        | 8.9E-07 | 0.522  | 0.758 | 0.477 | 1.3E-02 | P4 |
| Prnp          | 9.9E-07 | -0.533 | 0.71  | 0.894 | 1.4E-02 | P4 |
| Jpt1          | 1.5E-06 | 0.791  | 0.935 | 0.851 | 2.1E-02 | P4 |
| Atp6v1e1      | 1.6E-06 | -0.576 | 0.484 | 0.728 | 2.4E-02 | P4 |
| Ncl           | 1.7E-06 | 0.668  | 0.952 | 0.867 | 2.5E-02 | P4 |
| Cisd1         | 1.8E-06 | 0.523  | 0.629 | 0.374 | 2.6E-02 | P4 |
| Eif1ax        | 1.8E-06 | 0.525  | 0.742 | 0.53  | 2.6E-02 | P4 |
| Malat1        | 1.8E-06 | -0.517 | 1     | 0.999 | 2.7E-02 | P4 |
| Mxra8         | 1.9E-06 | -0.513 | 0.597 | 0.875 | 2.8E-02 | P4 |
| Pdpm          | 2.0E-06 | -0.557 | 0.355 | 0.687 | 2.9E-02 | P4 |
| Nme1          | 2.0E-06 | 0.638  | 0.903 | 0.759 | 3.0E-02 | P4 |
| Clec2d        | 2.1E-06 | -0.578 | 0.435 | 0.693 | 3.0E-02 | P4 |
| Mt1           | 2.6E-06 | -0.865 | 0.968 | 0.978 | 3.7E-02 | P4 |
| Antxr1        | 2.9E-06 | -0.566 | 0.581 | 0.806 | 4.2E-02 | P4 |
| Hmgn3         | 3.0E-06 | 0.571  | 0.855 | 0.776 | 4.4E-02 | P4 |
| Cpxm1         | 3.5E-06 | -0.566 | 0.742 | 0.927 | 5.1E-02 | P4 |
| Metrnl        | 3.7E-06 | -0.573 | 0.726 | 0.892 | 5.4E-02 | P4 |
| Ccl11         | 4.2E-06 | -0.801 | 0.677 | 0.856 | 6.1E-02 | P4 |
| Ar            | 4.4E-06 | -0.569 | 0.677 | 0.882 | 6.4E-02 | P4 |
| Emp1          | 5.2E-06 | 0.694  | 0.855 | 0.682 | 7.5E-02 | P4 |
| Eln           | 6.0E-06 | -0.590 | 0.452 | 0.699 | 8.8E-02 | P4 |
| Igfbp6        | 6.1E-06 | -0.695 | 0.855 | 0.993 | 8.8E-02 | P4 |
| Ube2k         | 6.3E-06 | 0.510  | 0.774 | 0.595 | 9.1E-02 | P4 |
| Col14a1       | 7.2E-06 | -0.676 | 0.613 | 0.859 | 1.0E-01 | P4 |
| Axl           | 8.1E-06 | -0.500 | 0.79  | 0.938 | 1.2E-01 | P4 |
| Cyc1          | 8.3E-06 | 0.543  | 0.71  | 0.53  | 1.2E-01 | P4 |
| Mmp23         | 9.6E-06 | -0.515 | 0.661 | 0.865 | 1.4E-01 | P4 |
| Eif3a         | 1.2E-05 | 0.501  | 0.823 | 0.713 | 1.8E-01 | P4 |
| Tmem158       | 1.3E-05 | -0.905 | 0.581 | 0.727 | 1.9E-01 | P4 |
| Ctsk          | 1.4E-05 | -0.588 | 0.839 | 0.931 | 2.0E-01 | P4 |
| Sh3bgrl3      | 1.5E-05 | 0.693  | 0.919 | 0.907 | 2.1E-01 | P4 |

|         |         |        |       |       |         |    |
|---------|---------|--------|-------|-------|---------|----|
| Gsn     | 1.5E-05 | -0.651 | 1     | 1     | 2.2E-01 | P4 |
| Ltbp1   | 1.6E-05 | -0.508 | 0.323 | 0.579 | 2.4E-01 | P4 |
| Abca1   | 1.6E-05 | -0.526 | 0.323 | 0.587 | 2.4E-01 | P4 |
| Xbp1    | 1.9E-05 | -0.514 | 0.597 | 0.735 | 2.7E-01 | P4 |
| Fos     | 2.2E-05 | -0.633 | 0.984 | 0.995 | 3.1E-01 | P4 |
| Glul    | 2.2E-05 | -0.691 | 0.548 | 0.71  | 3.2E-01 | P4 |
| Mt2     | 2.9E-05 | -0.907 | 0.726 | 0.875 | 4.2E-01 | P4 |
| Emilin2 | 3.0E-05 | -0.510 | 0.661 | 0.873 | 4.4E-01 | P4 |
| Klf2    | 3.1E-05 | -0.703 | 0.694 | 0.884 | 4.5E-01 | P4 |
| Cdc123  | 3.5E-05 | 0.509  | 0.548 | 0.356 | 5.1E-01 | P4 |
| Tmem159 | 3.7E-05 | -0.506 | 0.339 | 0.563 | 5.4E-01 | P4 |
| Cdkn1c  | 5.0E-05 | -0.859 | 0.468 | 0.676 | 7.2E-01 | P4 |
| Anxa3   | 5.5E-05 | -0.807 | 0.661 | 0.842 | 8.0E-01 | P4 |
| Ubc     | 6.7E-05 | -0.501 | 0.935 | 0.988 | 9.8E-01 | P4 |
| Mfap5   | 6.8E-05 | -0.576 | 0.887 | 0.987 | 9.9E-01 | P4 |
| Zfp36   | 8.0E-05 | -0.867 | 0.806 | 0.892 | 1.0E+00 | P4 |
| Sfrp4   | 1.0E-04 | -0.798 | 0.468 | 0.715 | 1.0E+00 | P4 |
| Tsc22d3 | 1.1E-04 | -0.514 | 0.435 | 0.682 | 1.0E+00 | P4 |
| Dbp     | 1.2E-04 | -0.593 | 0.452 | 0.659 | 1.0E+00 | P4 |
| Plac8   | 1.8E-04 | -0.839 | 0.887 | 0.939 | 1.0E+00 | P4 |
| Gpx3    | 2.0E-04 | -0.802 | 0.806 | 0.916 | 1.0E+00 | P4 |
| Fus     | 3.6E-04 | 0.511  | 0.726 | 0.586 | 1.0E+00 | P4 |
| Zbtb16  | 3.9E-04 | -0.524 | 0.355 | 0.545 | 1.0E+00 | P4 |
| Igfbp5  | 4.7E-04 | -0.938 | 0.645 | 0.793 | 1.0E+00 | P4 |
| Nfkbiz  | 5.1E-04 | -0.529 | 0.371 | 0.585 | 1.0E+00 | P4 |
| Lbp     | 6.5E-04 | -0.542 | 0.371 | 0.55  | 1.0E+00 | P4 |
| Ifi207  | 7.2E-04 | -0.555 | 0.548 | 0.653 | 1.0E+00 | P4 |
| Junb    | 7.5E-04 | -0.561 | 0.935 | 0.978 | 1.0E+00 | P4 |
| Fabp4   | 7.6E-04 | 1.425  | 0.645 | 0.532 | 1.0E+00 | P4 |
| Egr1    | 8.6E-04 | -0.534 | 0.935 | 0.98  | 1.0E+00 | P4 |
| Pla1a   | 9.3E-04 | -0.616 | 0.645 | 0.804 | 1.0E+00 | P4 |
| Phlda3  | 1.3E-03 | 0.501  | 0.532 | 0.363 | 1.0E+00 | P4 |
| Atf3    | 2.0E-03 | -0.710 | 0.629 | 0.728 | 1.0E+00 | P4 |
| Btg2    | 2.3E-03 | -0.541 | 0.855 | 0.899 | 1.0E+00 | P4 |
| Crip2   | 2.5E-03 | 0.646  | 0.516 | 0.376 | 1.0E+00 | P4 |
| Lox     | 4.1E-03 | -0.505 | 0.339 | 0.503 | 1.0E+00 | P4 |
| Il1r2   | 5.2E-03 | -0.769 | 0.419 | 0.526 | 1.0E+00 | P4 |
| Ccn1    | 5.8E-03 | -0.777 | 0.758 | 0.8   | 1.0E+00 | P4 |













































































Extended data Table 4

Maker genes for human preadipocytes clusters from human deep neck adipose tissue

|          | p_val     | avg_logF<br>C | pct.1 | pct.2 | p_val_adj | cluster    |
|----------|-----------|---------------|-------|-------|-----------|------------|
| ABCA10   | 2.37E-139 | 1.643247      | 0.95  | 0.691 | 4.43E-135 | H-cluster1 |
| COL15A1  | 3.27E-128 | 2.202305      | 0.75  | 0.101 | 6.12E-124 | H-cluster1 |
| GHR      | 2.94E-110 | 1.62349       | 0.842 | 0.404 | 5.51E-106 | H-cluster1 |
| FMO2     | 2.86E-106 | 1.934106      | 0.628 | 0.059 | 5.34E-102 | H-cluster1 |
| ABCA6    | 3.91E-84  | 1.064452      | 0.899 | 0.718 | 7.31E-80  | H-cluster1 |
| LIFR     | 1.70E-75  | 1.559298      | 0.645 | 0.212 | 3.18E-71  | H-cluster1 |
| ABCA9    | 3.86E-71  | 0.916248      | 0.94  | 0.817 | 7.23E-67  | H-cluster1 |
| COL4A2   | 1.97E-70  | 1.343027      | 0.575 | 0.129 | 3.69E-66  | H-cluster1 |
| PREX2    | 5.65E-68  | 1.333222      | 0.496 | 0.07  | 1.06E-63  | H-cluster1 |
| FGF10    | 9.68E-68  | 1.511671      | 0.504 | 0.076 | 1.81E-63  | H-cluster1 |
| BMPER    | 3.63E-67  | 1.465924      | 0.579 | 0.147 | 6.80E-63  | H-cluster1 |
| ABCA8    | 9.88E-66  | 0.992795      | 0.876 | 0.665 | 1.85E-61  | H-cluster1 |
| KAZN     | 3.59E-65  | 1.158915      | 0.871 | 0.71  | 6.71E-61  | H-cluster1 |
| TCF4     | 1.43E-64  | 0.985928      | 0.845 | 0.66  | 2.68E-60  | H-cluster1 |
| NAV2     | 7.55E-64  | 1.585897      | 0.547 | 0.136 | 1.41E-59  | H-cluster1 |
| MAML2    | 7.16E-61  | 1.094785      | 0.789 | 0.463 | 1.34E-56  | H-cluster1 |
| COL4A1   | 2.98E-60  | 1.257958      | 0.513 | 0.115 | 5.57E-56  | H-cluster1 |
| ARHGAP24 | 1.06E-58  | 1.042559      | 0.816 | 0.557 | 1.98E-54  | H-cluster1 |
| LHFPL6   | 9.55E-58  | 0.921128      | 0.846 | 0.591 | 1.79E-53  | H-cluster1 |
| SPECC1   | 1.30E-56  | 1.321465      | 0.424 | 0.059 | 2.44E-52  | H-cluster1 |
| LDB2     | 4.86E-54  | 1.078989      | 0.73  | 0.412 | 9.09E-50  | H-cluster1 |
| SLC9A9   | 2.06E-51  | 0.919904      | 0.776 | 0.49  | 3.85E-47  | H-cluster1 |
| ABCB11   | 4.46E-51  | 1.584358      | 0.328 | 0.014 | 8.34E-47  | H-cluster1 |
| PID1     | 1.61E-50  | 0.84469       | 0.836 | 0.629 | 3.01E-46  | H-cluster1 |
| RORA     | 1.96E-50  | 0.563972      | 0.964 | 0.917 | 3.67E-46  | H-cluster1 |
| KCND2    | 4.81E-48  | 0.997406      | 0.708 | 0.332 | 9.01E-44  | H-cluster1 |
| PPARG    | 1.91E-45  | 1.076946      | 0.514 | 0.172 | 3.58E-41  | H-cluster1 |
| CAMK2D   | 5.94E-45  | 0.877364      | 0.754 | 0.513 | 1.11E-40  | H-cluster1 |
| ACACB    | 6.60E-43  | 1.124224      | 0.629 | 0.337 | 1.23E-38  | H-cluster1 |
| TRHDE    | 7.24E-43  | 1.342242      | 0.352 | 0.056 | 1.35E-38  | H-cluster1 |
| BOC      | 9.23E-42  | 0.992619      | 0.559 | 0.237 | 1.73E-37  | H-cluster1 |
| PKD1L2   | 2.67E-40  | 1.128601      | 0.402 | 0.098 | 4.99E-36  | H-cluster1 |
| NRP1     | 2.77E-40  | 0.983764      | 0.655 | 0.382 | 5.19E-36  | H-cluster1 |
| PRKG1    | 5.73E-40  | 0.913944      | 0.721 | 0.424 | 1.07E-35  | H-cluster1 |
| TBC1D4   | 1.04E-39  | 0.959357      | 0.614 | 0.317 | 1.94E-35  | H-cluster1 |
| PLD1     | 1.00E-38  | 0.882197      | 0.659 | 0.374 | 1.88E-34  | H-cluster1 |
| RBPMS    | 1.06E-38  | 0.85745       | 0.741 | 0.529 | 1.99E-34  | H-cluster1 |
| IGF1     | 4.23E-38  | 0.927717      | 0.487 | 0.17  | 7.91E-34  | H-cluster1 |
| MME      | 9.59E-38  | 1.137304      | 0.398 | 0.108 | 1.79E-33  | H-cluster1 |
| ANGPT1   | 3.08E-37  | 1.070399      | 0.397 | 0.103 | 5.76E-33  | H-cluster1 |
| APOD     | 1.23E-35  | 0.604412      | 0.489 | 0.161 | 2.31E-31  | H-cluster1 |
| MAPK10   | 1.63E-35  | 0.937859      | 0.645 | 0.404 | 3.05E-31  | H-cluster1 |
| PRICKLE2 | 4.71E-35  | 0.881758      | 0.537 | 0.256 | 8.80E-31  | H-cluster1 |



|          |          |          |       |       |          |            |
|----------|----------|----------|-------|-------|----------|------------|
| PLPP3    | 3.72E-34 | 1.108988 | 0.552 | 0.29  | 6.95E-30 | H-cluster1 |
| FAM13A   | 4.17E-34 | 0.800011 | 0.661 | 0.426 | 7.79E-30 | H-cluster1 |
| SLIT3    | 7.60E-34 | 0.694583 | 0.694 | 0.396 | 1.42E-29 | H-cluster1 |
| RUNX1T1  | 1.31E-33 | 0.70427  | 0.772 | 0.593 | 2.45E-29 | H-cluster1 |
| PRICKLE1 | 1.98E-33 | 0.793651 | 0.598 | 0.307 | 3.71E-29 | H-cluster1 |
| PQLC2L   | 2.03E-33 | 0.836948 | 0.329 | 0.07  | 3.79E-29 | H-cluster1 |
| IMMP2L   | 4.90E-33 | 0.717803 | 0.793 | 0.619 | 9.17E-29 | H-cluster1 |
| ACVR2A   | 7.41E-33 | 0.858494 | 0.568 | 0.287 | 1.39E-28 | H-cluster1 |
| DPP6     | 9.43E-33 | 1.128358 | 0.307 | 0.064 | 1.76E-28 | H-cluster1 |
| LAMA2    | 3.02E-32 | 0.614804 | 0.92  | 0.852 | 5.66E-28 | H-cluster1 |
| SUSD1    | 1.06E-31 | 0.820394 | 0.296 | 0.055 | 1.98E-27 | H-cluster1 |
| PTEN     | 1.47E-31 | 0.842656 | 0.678 | 0.499 | 2.75E-27 | H-cluster1 |
| DPYD     | 2.29E-31 | 0.593506 | 0.806 | 0.666 | 4.28E-27 | H-cluster1 |
| MYCBP2   | 2.59E-31 | 0.670875 | 0.761 | 0.622 | 4.84E-27 | H-cluster1 |
| ADH1B    | 8.74E-31 | 0.878248 | 0.598 | 0.328 | 1.63E-26 | H-cluster1 |
| RIPOR3   | 1.94E-29 | 0.781834 | 0.487 | 0.22  | 3.63E-25 | H-cluster1 |
| EPSTI1   | 4.98E-29 | 0.777846 | 0.279 | 0.053 | 9.32E-25 | H-cluster1 |
| HMGCLL1  | 1.14E-28 | 0.8719   | 0.269 | 0.048 | 2.13E-24 | H-cluster1 |
| ABCA5    | 1.51E-28 | 0.767265 | 0.441 | 0.184 | 2.82E-24 | H-cluster1 |
| GPC3     | 1.59E-28 | 0.840736 | 0.368 | 0.109 | 2.97E-24 | H-cluster1 |
| MOB3B    | 7.45E-28 | 0.859013 | 0.319 | 0.087 | 1.39E-23 | H-cluster1 |
| ITIH5    | 5.47E-27 | 0.808348 | 0.52  | 0.279 | 1.02E-22 | H-cluster1 |
| ENPEP    | 5.39E-25 | 0.731324 | 0.28  | 0.07  | 1.01E-20 | H-cluster1 |
| BCL6     | 2.25E-24 | 0.681831 | 0.434 | 0.193 | 4.20E-20 | H-cluster1 |
| CYP7B1   | 2.52E-24 | 0.9478   | 0.438 | 0.203 | 4.72E-20 | H-cluster1 |
| LAMC1    | 2.56E-24 | 0.623498 | 0.754 | 0.647 | 4.79E-20 | H-cluster1 |
| ANTXR2   | 4.71E-24 | 0.68607  | 0.657 | 0.477 | 8.81E-20 | H-cluster1 |
| MYOC     | 5.90E-24 | 0.55625  | 0.256 | 0.055 | 1.10E-19 | H-cluster1 |
| RHOBTB3  | 1.05E-23 | 0.709721 | 0.631 | 0.465 | 1.96E-19 | H-cluster1 |
| AMPH     | 2.14E-23 | 0.855766 | 0.381 | 0.168 | 4.00E-19 | H-cluster1 |
| LMO3     | 3.00E-23 | 0.75894  | 0.478 | 0.245 | 5.61E-19 | H-cluster1 |
| CXCL14   | 7.42E-23 | 0.511535 | 0.29  | 0.073 | 1.39E-18 | H-cluster1 |
| PCDH9    | 1.15E-22 | 0.880386 | 0.542 | 0.32  | 2.15E-18 | H-cluster1 |
| SRPX     | 2.08E-22 | 0.728082 | 0.295 | 0.089 | 3.88E-18 | H-cluster1 |
| PTPRS    | 4.54E-22 | 0.613789 | 0.704 | 0.565 | 8.49E-18 | H-cluster1 |
| TTC39C   | 1.07E-21 | 0.727581 | 0.399 | 0.189 | 2.00E-17 | H-cluster1 |
| SASH1    | 2.11E-21 | 0.589187 | 0.678 | 0.512 | 3.95E-17 | H-cluster1 |
| REV3L    | 2.71E-21 | 0.60029  | 0.72  | 0.596 | 5.06E-17 | H-cluster1 |
| EYA1     | 2.96E-21 | 0.698032 | 0.284 | 0.086 | 5.53E-17 | H-cluster1 |
| MITF     | 6.58E-21 | 0.685421 | 0.467 | 0.251 | 1.23E-16 | H-cluster1 |
| MAP3K5   | 6.64E-21 | 0.799572 | 0.397 | 0.184 | 1.24E-16 | H-cluster1 |
| MAN1A1   | 9.05E-21 | 0.6577   | 0.596 | 0.417 | 1.69E-16 | H-cluster1 |
| PDE1A    | 7.08E-20 | 0.705232 | 0.318 | 0.12  | 1.32E-15 | H-cluster1 |
| FAM129A  | 1.06E-19 | 0.671743 | 0.414 | 0.211 | 1.98E-15 | H-cluster1 |
| FGF7     | 2.60E-19 | 0.651889 | 0.547 | 0.353 | 4.86E-15 | H-cluster1 |
| TLN2     | 2.69E-19 | 0.598368 | 0.634 | 0.459 | 5.03E-15 | H-cluster1 |
| SVEP1    | 3.35E-19 | 0.556097 | 0.698 | 0.569 | 6.27E-15 | H-cluster1 |

|          |          |          |       |       |          |            |
|----------|----------|----------|-------|-------|----------|------------|
| DHRS3    | 5.49E-19 | 0.520727 | 0.537 | 0.314 | 1.03E-14 | H-cluster1 |
| ADAMTS12 | 1.03E-18 | 0.6636   | 0.335 | 0.136 | 1.92E-14 | H-cluster1 |
| MYO1D    | 1.23E-18 | 0.842995 | 0.283 | 0.105 | 2.30E-14 | H-cluster1 |
| ECHDC2   | 3.38E-18 | 0.605507 | 0.58  | 0.431 | 6.33E-14 | H-cluster1 |
| CDH11    | 4.04E-18 | 0.494225 | 0.306 | 0.114 | 7.56E-14 | H-cluster1 |
| AGTR1    | 5.42E-18 | 0.726815 | 0.365 | 0.179 | 1.01E-13 | H-cluster1 |
| LMOD1    | 7.91E-17 | 0.581683 | 0.328 | 0.144 | 1.48E-12 | H-cluster1 |
| LAMA4    | 8.02E-17 | 0.490679 | 0.741 | 0.655 | 1.50E-12 | H-cluster1 |
| NFIB     | 1.06E-16 | 0.372277 | 0.851 | 0.803 | 1.97E-12 | H-cluster1 |
| NR3C1    | 1.46E-16 | 0.493006 | 0.688 | 0.576 | 2.73E-12 | H-cluster1 |
| CRYBG3   | 1.96E-16 | 0.667835 | 0.412 | 0.239 | 3.66E-12 | H-cluster1 |
| GLIS3    | 2.80E-16 | 0.514253 | 0.31  | 0.134 | 5.23E-12 | H-cluster1 |
| TMEM135  | 5.38E-16 | 0.512147 | 0.652 | 0.529 | 1.01E-11 | H-cluster1 |
| SBF2     | 5.71E-16 | 0.399445 | 0.796 | 0.736 | 1.07E-11 | H-cluster1 |
| FAM49A   | 6.24E-16 | 0.56281  | 0.303 | 0.133 | 1.17E-11 | H-cluster1 |
| RFTN1    | 1.85E-15 | 0.561877 | 0.588 | 0.437 | 3.46E-11 | H-cluster1 |
| DEPTOR   | 1.94E-15 | 0.688744 | 0.29  | 0.125 | 3.63E-11 | H-cluster1 |
| FAM214A  | 1.94E-15 | 0.595577 | 0.539 | 0.396 | 3.63E-11 | H-cluster1 |
| CLSTN2   | 2.54E-15 | 0.819472 | 0.261 | 0.103 | 4.76E-11 | H-cluster1 |
| LRFN5    | 4.43E-15 | 0.727842 | 0.414 | 0.24  | 8.29E-11 | H-cluster1 |
| ENOSF1   | 6.89E-15 | 0.548989 | 0.455 | 0.282 | 1.29E-10 | H-cluster1 |
| PNPLA7   | 8.29E-15 | 0.590133 | 0.284 | 0.126 | 1.55E-10 | H-cluster1 |
| DLC1     | 1.02E-14 | 0.337211 | 0.925 | 0.899 | 1.91E-10 | H-cluster1 |
| CHL1     | 1.30E-14 | 0.6718   | 0.54  | 0.398 | 2.43E-10 | H-cluster1 |
| MBNL1    | 1.65E-14 | 0.376817 | 0.839 | 0.789 | 3.09E-10 | H-cluster1 |
| CXCL12   | 2.49E-14 | 0.474314 | 0.33  | 0.165 | 4.67E-10 | H-cluster1 |
| COL5A3   | 3.86E-14 | 0.651123 | 0.261 | 0.112 | 7.21E-10 | H-cluster1 |
| COLEC12  | 4.18E-14 | 0.514093 | 0.56  | 0.395 | 7.82E-10 | H-cluster1 |
| BCL2     | 5.98E-14 | 0.528702 | 0.489 | 0.312 | 1.12E-09 | H-cluster1 |
| FOXP2    | 7.00E-14 | 0.450371 | 0.72  | 0.641 | 1.31E-09 | H-cluster1 |
| PNISR    | 9.14E-14 | 0.390234 | 0.717 | 0.635 | 1.71E-09 | H-cluster1 |
| RNF144A  | 2.08E-13 | 0.514931 | 0.259 | 0.109 | 3.88E-09 | H-cluster1 |
| SPATA6   | 2.45E-13 | 0.492212 | 0.602 | 0.487 | 4.58E-09 | H-cluster1 |
| C3       | 5.03E-13 | 0.318663 | 0.532 | 0.332 | 9.41E-09 | H-cluster1 |
| PARD3    | 5.19E-13 | 0.363604 | 0.777 | 0.735 | 9.71E-09 | H-cluster1 |
| PRKN     | 8.94E-13 | 0.485406 | 0.591 | 0.44  | 1.67E-08 | H-cluster1 |
| LYPLAL1  | 2.28E-12 | 0.530267 | 0.415 | 0.261 | 4.26E-08 | H-cluster1 |
| AUH      | 2.78E-12 | 0.522199 | 0.464 | 0.334 | 5.20E-08 | H-cluster1 |
| FOXN3    | 2.86E-12 | 0.327468 | 0.792 | 0.725 | 5.35E-08 | H-cluster1 |
| EDA      | 3.13E-12 | 0.663912 | 0.409 | 0.259 | 5.85E-08 | H-cluster1 |
| DMD      | 3.39E-12 | 0.688766 | 0.444 | 0.301 | 6.34E-08 | H-cluster1 |
| SNED1    | 6.45E-12 | 0.544235 | 0.499 | 0.362 | 1.21E-07 | H-cluster1 |
| PODN     | 6.61E-12 | 0.561282 | 0.468 | 0.342 | 1.24E-07 | H-cluster1 |
| BICC1    | 1.52E-11 | 0.304343 | 0.792 | 0.721 | 2.84E-07 | H-cluster1 |
| PTBP3    | 1.79E-11 | 0.557053 | 0.415 | 0.284 | 3.35E-07 | H-cluster1 |
| IGFBP7   | 1.84E-11 | 0.450324 | 0.379 | 0.225 | 3.45E-07 | H-cluster1 |
| IL16     | 2.01E-11 | 0.450791 | 0.319 | 0.172 | 3.77E-07 | H-cluster1 |

|            |          |          |       |       |          |            |
|------------|----------|----------|-------|-------|----------|------------|
| WASF3      | 3.00E-11 | 0.431251 | 0.259 | 0.125 | 5.61E-07 | H-cluster1 |
| TCF7L1     | 3.01E-11 | 0.480421 | 0.585 | 0.491 | 5.64E-07 | H-cluster1 |
| EBF3       | 6.13E-11 | 0.391346 | 0.621 | 0.504 | 1.15E-06 | H-cluster1 |
| MAP4K3     | 6.19E-11 | 0.414527 | 0.524 | 0.398 | 1.16E-06 | H-cluster1 |
| RHOJ       | 6.83E-11 | 0.469802 | 0.293 | 0.154 | 1.28E-06 | H-cluster1 |
| TMEM132C   | 7.24E-11 | 0.43255  | 0.412 | 0.261 | 1.35E-06 | H-cluster1 |
| PIK3R1     | 7.36E-11 | 0.546315 | 0.516 | 0.398 | 1.38E-06 | H-cluster1 |
| FRMD6      | 7.71E-11 | 0.488825 | 0.565 | 0.459 | 1.44E-06 | H-cluster1 |
| COL6A3     | 8.06E-11 | 0.329383 | 0.657 | 0.534 | 1.51E-06 | H-cluster1 |
| NRIP1      | 8.79E-11 | 0.432894 | 0.516 | 0.399 | 1.64E-06 | H-cluster1 |
| ARHGAP44   | 8.98E-11 | 0.519556 | 0.256 | 0.125 | 1.68E-06 | H-cluster1 |
| SAMHD1     | 1.18E-10 | 0.530071 | 0.379 | 0.243 | 2.20E-06 | H-cluster1 |
| RNF24      | 1.77E-10 | 0.42901  | 0.257 | 0.125 | 3.32E-06 | H-cluster1 |
| COL5A2     | 2.00E-10 | 0.322515 | 0.659 | 0.552 | 3.73E-06 | H-cluster1 |
| PGM5       | 3.35E-10 | 0.537099 | 0.264 | 0.136 | 6.27E-06 | H-cluster1 |
| MACROD2    | 4.42E-10 | 0.655961 | 0.257 | 0.134 | 8.27E-06 | H-cluster1 |
| EGFR       | 4.61E-10 | 0.321606 | 0.754 | 0.713 | 8.61E-06 | H-cluster1 |
| DIAPH2     | 6.46E-10 | 0.284327 | 0.734 | 0.665 | 1.21E-05 | H-cluster1 |
| SPRED1     | 7.11E-10 | 0.488775 | 0.448 | 0.335 | 1.33E-05 | H-cluster1 |
| ZNF385D    | 8.92E-10 | 0.669853 | 0.487 | 0.376 | 1.67E-05 | H-cluster1 |
| HELZ       | 9.31E-10 | 0.439457 | 0.553 | 0.448 | 1.74E-05 | H-cluster1 |
| ANKRD28    | 1.80E-09 | 0.474493 | 0.447 | 0.328 | 3.37E-05 | H-cluster1 |
| SLC25A13   | 1.97E-09 | 0.479305 | 0.422 | 0.3   | 3.68E-05 | H-cluster1 |
| CCDC102B   | 2.09E-09 | 0.787183 | 0.263 | 0.14  | 3.91E-05 | H-cluster1 |
| LPAR1      | 2.63E-09 | 0.31427  | 0.68  | 0.579 | 4.93E-05 | H-cluster1 |
| CALD1      | 3.13E-09 | 0.310969 | 0.736 | 0.672 | 5.85E-05 | H-cluster1 |
| PLA2R1     | 4.03E-09 | 0.382864 | 0.289 | 0.164 | 7.53E-05 | H-cluster1 |
| ASPH       | 5.07E-09 | 0.356626 | 0.631 | 0.546 | 9.48E-05 | H-cluster1 |
| PCED1B     | 5.72E-09 | 0.531688 | 0.372 | 0.25  | 0.000107 | H-cluster1 |
| AC119674.2 | 5.88E-09 | 0.553879 | 0.421 | 0.301 | 0.00011  | H-cluster1 |
| DYNC2H1    | 6.86E-09 | 0.44018  | 0.56  | 0.482 | 0.000128 | H-cluster1 |
| SGCD       | 1.57E-08 | 0.403573 | 0.477 | 0.362 | 0.000294 | H-cluster1 |
| GPHN       | 1.62E-08 | 0.358204 | 0.625 | 0.548 | 0.000304 | H-cluster1 |
| MAML3      | 1.73E-08 | 0.512021 | 0.273 | 0.158 | 0.000323 | H-cluster1 |
| CDON       | 2.11E-08 | 0.397459 | 0.552 | 0.448 | 0.000395 | H-cluster1 |
| MICU3      | 2.29E-08 | 0.411881 | 0.421 | 0.31  | 0.000429 | H-cluster1 |
| SSBP2      | 2.88E-08 | 0.297282 | 0.737 | 0.677 | 0.000538 | H-cluster1 |
| SLC27A1    | 3.17E-08 | 0.420753 | 0.284 | 0.173 | 0.000592 | H-cluster1 |
| PLSCR4     | 6.29E-08 | 0.370975 | 0.542 | 0.465 | 0.001176 | H-cluster1 |
| MT-ND3     | 6.75E-08 | 0.295599 | 0.976 | 0.927 | 0.001262 | H-cluster1 |
| TRAK2      | 7.60E-08 | 0.391271 | 0.371 | 0.262 | 0.001422 | H-cluster1 |
| ZDHHC14    | 7.99E-08 | 0.482374 | 0.277 | 0.165 | 0.001494 | H-cluster1 |
| MIPOL1     | 8.18E-08 | 0.400878 | 0.397 | 0.279 | 0.00153  | H-cluster1 |
| FREM1      | 8.92E-08 | 0.399773 | 0.32  | 0.198 | 0.001668 | H-cluster1 |
| NR3C2      | 8.93E-08 | 0.398597 | 0.491 | 0.378 | 0.00167  | H-cluster1 |
| MAP3K20    | 9.72E-08 | 0.455601 | 0.46  | 0.363 | 0.001817 | H-cluster1 |
| ARHGAP10   | 1.15E-07 | 0.3421   | 0.672 | 0.638 | 0.002145 | H-cluster1 |

|         |          |          |       |       |          |            |
|---------|----------|----------|-------|-------|----------|------------|
| GAB1    | 1.36E-07 | 0.445885 | 0.467 | 0.379 | 0.002553 | H-cluster1 |
| INSR    | 1.37E-07 | 0.34476  | 0.534 | 0.441 | 0.002564 | H-cluster1 |
| PHIP    | 1.39E-07 | 0.401372 | 0.52  | 0.424 | 0.002608 | H-cluster1 |
| CCND3   | 1.43E-07 | 0.529887 | 0.29  | 0.187 | 0.00268  | H-cluster1 |
| SETBP1  | 1.52E-07 | 0.378853 | 0.614 | 0.518 | 0.002845 | H-cluster1 |
| NCOA1   | 1.56E-07 | 0.290943 | 0.753 | 0.724 | 0.002921 | H-cluster1 |
| ANO6    | 1.91E-07 | 0.373484 | 0.526 | 0.446 | 0.003571 | H-cluster1 |
| FGD4    | 2.46E-07 | 0.440181 | 0.371 | 0.267 | 0.004599 | H-cluster1 |
| CFH     | 3.19E-07 | 0.305536 | 0.477 | 0.354 | 0.00596  | H-cluster1 |
| DAAM1   | 3.26E-07 | 0.483448 | 0.401 | 0.304 | 0.006101 | H-cluster1 |
| OGT     | 3.44E-07 | 0.337711 | 0.586 | 0.523 | 0.006427 | H-cluster1 |
| PITPNC1 | 3.85E-07 | 0.381557 | 0.468 | 0.362 | 0.007193 | H-cluster1 |
| GULP1   | 4.27E-07 | 0.362593 | 0.562 | 0.466 | 0.007989 | H-cluster1 |
| NDUFAF6 | 6.13E-07 | 0.434323 | 0.259 | 0.161 | 0.01147  | H-cluster1 |
| GPATCH8 | 6.47E-07 | 0.294678 | 0.622 | 0.548 | 0.0121   | H-cluster1 |
| SKAP2   | 6.66E-07 | 0.365256 | 0.534 | 0.454 | 0.012449 | H-cluster1 |
| HERC1   | 7.10E-07 | 0.350549 | 0.615 | 0.548 | 0.013277 | H-cluster1 |
| PDZRN3  | 7.72E-07 | 0.335472 | 0.522 | 0.417 | 0.014443 | H-cluster1 |
| CDK14   | 1.91E-06 | 0.320999 | 0.579 | 0.515 | 0.035759 | H-cluster1 |
| USP33   | 2.14E-06 | 0.354057 | 0.527 | 0.46  | 0.040078 | H-cluster1 |
| GSE1    | 2.17E-06 | 0.412469 | 0.379 | 0.278 | 0.040615 | H-cluster1 |
| PRRX1   | 2.76E-06 | 0.275564 | 0.701 | 0.674 | 0.051559 | H-cluster1 |
| MBTD1   | 3.26E-06 | 0.350943 | 0.411 | 0.318 | 0.060951 | H-cluster1 |
| HNMT    | 3.36E-06 | 0.308771 | 0.312 | 0.218 | 0.062864 | H-cluster1 |
| TNRC6A  | 3.52E-06 | 0.274061 | 0.71  | 0.693 | 0.065753 | H-cluster1 |
| RBPJ    | 3.85E-06 | 0.361482 | 0.615 | 0.562 | 0.071949 | H-cluster1 |
| ANKRD36 | 4.16E-06 | 0.315635 | 0.513 | 0.429 | 0.077869 | H-cluster1 |
| NTRK2   | 4.26E-06 | 0.394958 | 0.29  | 0.197 | 0.079659 | H-cluster1 |
| GAREM1  | 4.32E-06 | 0.408476 | 0.259 | 0.17  | 0.080744 | H-cluster1 |
| ARHGAP6 | 4.79E-06 | 0.375637 | 0.427 | 0.339 | 0.089539 | H-cluster1 |
| CC2D2A  | 5.04E-06 | 0.426797 | 0.259 | 0.173 | 0.094262 | H-cluster1 |
| EYA2    | 5.40E-06 | 0.326274 | 0.358 | 0.256 | 0.100916 | H-cluster1 |
| DLG2    | 5.61E-06 | 0.321807 | 0.68  | 0.632 | 0.104852 | H-cluster1 |
| PXK     | 6.89E-06 | 0.399685 | 0.326 | 0.24  | 0.128896 | H-cluster1 |
| CAPS2   | 7.42E-06 | 0.373738 | 0.322 | 0.229 | 0.138723 | H-cluster1 |
| ZFHX4   | 8.00E-06 | 0.384368 | 0.451 | 0.37  | 0.149686 | H-cluster1 |
| PTBP2   | 8.11E-06 | 0.331174 | 0.552 | 0.493 | 0.151752 | H-cluster1 |
| ITPR2   | 8.22E-06 | 0.37196  | 0.391 | 0.307 | 0.153744 | H-cluster1 |
| ETFDH   | 8.50E-06 | 0.356066 | 0.279 | 0.187 | 0.159048 | H-cluster1 |
| ST8SIA1 | 1.13E-05 | 0.46778  | 0.279 | 0.197 | 0.21077  | H-cluster1 |
| ACSS3   | 1.30E-05 | 0.320273 | 0.376 | 0.284 | 0.2427   | H-cluster1 |
| NPEPPS  | 1.34E-05 | 0.271873 | 0.589 | 0.523 | 0.250095 | H-cluster1 |
| RAD51B  | 1.52E-05 | 0.408043 | 0.507 | 0.418 | 0.284296 | H-cluster1 |
| TRPS1   | 1.53E-05 | 0.397984 | 0.372 | 0.293 | 0.286294 | H-cluster1 |
| SCP2    | 1.56E-05 | 0.392374 | 0.427 | 0.356 | 0.290874 | H-cluster1 |
| SNX29   | 1.58E-05 | 0.308358 | 0.568 | 0.524 | 0.29571  | H-cluster1 |
| SYNE3   | 2.17E-05 | 0.344847 | 0.362 | 0.281 | 0.404959 | H-cluster1 |

|          |          |          |       |       |          |            |
|----------|----------|----------|-------|-------|----------|------------|
| ARID5B   | 2.21E-05 | 0.270804 | 0.408 | 0.317 | 0.413702 | H-cluster1 |
| SH3KBP1  | 2.24E-05 | 0.415515 | 0.306 | 0.225 | 0.418301 | H-cluster1 |
| NT5C2    | 2.89E-05 | 0.299992 | 0.511 | 0.443 | 0.54092  | H-cluster1 |
| PAN3     | 2.90E-05 | 0.2918   | 0.601 | 0.554 | 0.543032 | H-cluster1 |
| ZRANB2   | 3.25E-05 | 0.312951 | 0.507 | 0.449 | 0.606978 | H-cluster1 |
| ATP11C   | 3.48E-05 | 0.372798 | 0.28  | 0.197 | 0.650784 | H-cluster1 |
| ARHGAP26 | 3.65E-05 | 0.357985 | 0.408 | 0.326 | 0.683381 | H-cluster1 |
| TPCN1    | 4.12E-05 | 0.373598 | 0.369 | 0.293 | 0.770639 | H-cluster1 |
| ZNF292   | 4.16E-05 | 0.288618 | 0.536 | 0.482 | 0.778039 | H-cluster1 |
| PTPRK    | 4.16E-05 | 0.475497 | 0.29  | 0.214 | 0.778143 | H-cluster1 |
| MPZL1    | 4.41E-05 | 0.385585 | 0.428 | 0.365 | 0.824799 | H-cluster1 |
| JAK1     | 4.53E-05 | 0.337392 | 0.474 | 0.401 | 0.84694  | H-cluster1 |
| VWA8     | 4.82E-05 | 0.318098 | 0.384 | 0.307 | 0.902113 | H-cluster1 |
| ALDH1A1  | 5.19E-05 | 0.332404 | 0.276 | 0.197 | 0.970674 | H-cluster1 |
| HSDL2    | 5.71E-05 | 0.354672 | 0.266 | 0.189 | 1        | H-cluster1 |
| SGCE     | 6.33E-05 | 0.353655 | 0.362 | 0.285 | 1        | H-cluster1 |
| XPO1     | 6.75E-05 | 0.379757 | 0.421 | 0.365 | 1        | H-cluster1 |
| MAGI2    | 6.91E-05 | 0.265145 | 0.631 | 0.573 | 1        | H-cluster1 |
| GPX3     | 7.13E-05 | 0.395181 | 0.407 | 0.332 | 1        | H-cluster1 |
| DDI2     | 7.34E-05 | 0.299448 | 0.272 | 0.19  | 1        | H-cluster1 |
| KIAA1217 | 7.52E-05 | 0.314587 | 0.414 | 0.343 | 1        | H-cluster1 |
| ZNF680   | 8.27E-05 | 0.255239 | 0.28  | 0.2   | 1        | H-cluster1 |
| CLK4     | 8.30E-05 | 0.322144 | 0.3   | 0.222 | 1        | H-cluster1 |
| PLCL1    | 9.47E-05 | 0.320796 | 0.335 | 0.246 | 1        | H-cluster1 |
| WWP1     | 0.000106 | 0.328202 | 0.399 | 0.332 | 1        | H-cluster1 |
| HIBADH   | 0.000114 | 0.356485 | 0.402 | 0.331 | 1        | H-cluster1 |
| OSBPL1A  | 0.000148 | 0.340082 | 0.325 | 0.254 | 1        | H-cluster1 |
| MDM4     | 0.000158 | 0.298338 | 0.491 | 0.431 | 1        | H-cluster1 |
| KLHL24   | 0.000158 | 0.291178 | 0.392 | 0.328 | 1        | H-cluster1 |
| PDK4     | 0.00016  | 0.398799 | 0.399 | 0.337 | 1        | H-cluster1 |
| POU2F1   | 0.000173 | 0.279153 | 0.516 | 0.465 | 1        | H-cluster1 |
| TC2N     | 0.000199 | 0.331159 | 0.428 | 0.362 | 1        | H-cluster1 |
| TBL1XR1  | 0.000203 | 0.266267 | 0.609 | 0.571 | 1        | H-cluster1 |
| HSD17B4  | 0.000219 | 0.302506 | 0.272 | 0.198 | 1        | H-cluster1 |
| CFLAR    | 0.000251 | 0.274874 | 0.536 | 0.49  | 1        | H-cluster1 |
| MICU1    | 0.000255 | 0.262326 | 0.391 | 0.317 | 1        | H-cluster1 |
| EPS8     | 0.00026  | 0.337172 | 0.414 | 0.346 | 1        | H-cluster1 |
| PATJ     | 0.000279 | 0.303832 | 0.286 | 0.215 | 1        | H-cluster1 |
| ANKS1B   | 0.000307 | 0.286226 | 0.371 | 0.296 | 1        | H-cluster1 |
| ETFA     | 0.000359 | 0.291977 | 0.341 | 0.273 | 1        | H-cluster1 |
| MEIS2    | 0.000411 | 0.351261 | 0.522 | 0.477 | 1        | H-cluster1 |
| GABBR1   | 0.000426 | 0.32385  | 0.253 | 0.187 | 1        | H-cluster1 |
| MTURN    | 0.000428 | 0.253698 | 0.251 | 0.183 | 1        | H-cluster1 |
| UBE2H    | 0.000533 | 0.288188 | 0.532 | 0.479 | 1        | H-cluster1 |
| PDCD4    | 0.000673 | 0.304844 | 0.352 | 0.292 | 1        | H-cluster1 |
| SCAPER   | 0.000704 | 0.251652 | 0.463 | 0.404 | 1        | H-cluster1 |
| DIP2B    | 0.000706 | 0.298489 | 0.412 | 0.356 | 1        | H-cluster1 |

|          |           |          |       |       |           |            |
|----------|-----------|----------|-------|-------|-----------|------------|
| ATG7     | 0.000788  | 0.290326 | 0.503 | 0.463 | 1         | H-cluster1 |
| MBOAT1   | 0.000797  | 0.256832 | 0.26  | 0.193 | 1         | H-cluster1 |
| ATF7IP   | 0.0008    | 0.293212 | 0.438 | 0.39  | 1         | H-cluster1 |
| RBM26    | 0.000819  | 0.261813 | 0.511 | 0.476 | 1         | H-cluster1 |
| ADGRL2   | 0.001242  | 0.274217 | 0.333 | 0.273 | 1         | H-cluster1 |
| ANAPC5   | 0.001287  | 0.272193 | 0.435 | 0.399 | 1         | H-cluster1 |
| FKBP5    | 0.001301  | 0.369254 | 0.289 | 0.229 | 1         | H-cluster1 |
| PUM3     | 0.001515  | 0.302899 | 0.315 | 0.257 | 1         | H-cluster1 |
| OSBPL8   | 0.001528  | 0.334583 | 0.412 | 0.378 | 1         | H-cluster1 |
| MEIS1    | 0.002294  | 0.279531 | 0.473 | 0.448 | 1         | H-cluster1 |
| DSE      | 0.002312  | 0.255959 | 0.466 | 0.42  | 1         | H-cluster1 |
| GPD2     | 0.002396  | 0.295935 | 0.323 | 0.267 | 1         | H-cluster1 |
| LRBA     | 0.002478  | 0.254946 | 0.565 | 0.538 | 1         | H-cluster1 |
| NSD3     | 0.002494  | 0.288781 | 0.468 | 0.438 | 1         | H-cluster1 |
| SLC25A27 | 0.0026    | 0.25962  | 0.287 | 0.232 | 1         | H-cluster1 |
| SSH2     | 0.002691  | 0.272413 | 0.608 | 0.598 | 1         | H-cluster1 |
| JARID2   | 0.002801  | 0.266436 | 0.323 | 0.27  | 1         | H-cluster1 |
| KIAA1328 | 0.002816  | 0.252294 | 0.46  | 0.412 | 1         | H-cluster1 |
| RFTN2    | 0.002899  | 0.281307 | 0.299 | 0.243 | 1         | H-cluster1 |
| NUBPL    | 0.003072  | 0.326181 | 0.264 | 0.211 | 1         | H-cluster1 |
| OXR1     | 0.003397  | 0.297535 | 0.428 | 0.392 | 1         | H-cluster1 |
| SUPT3H   | 0.003755  | 0.272824 | 0.322 | 0.265 | 1         | H-cluster1 |
| JAK2     | 0.004162  | 0.303624 | 0.276 | 0.229 | 1         | H-cluster1 |
| GARNL3   | 0.004502  | 0.264579 | 0.267 | 0.212 | 1         | H-cluster1 |
| INVS     | 0.005119  | 0.26761  | 0.458 | 0.423 | 1         | H-cluster1 |
| PHTF2    | 0.005359  | 0.272971 | 0.297 | 0.253 | 1         | H-cluster1 |
| DENND1B  | 0.00604   | 0.274079 | 0.266 | 0.217 | 1         | H-cluster1 |
| PCCA     | 0.006091  | 0.269192 | 0.509 | 0.493 | 1         | H-cluster1 |
| PER3     | 0.006481  | 0.288803 | 0.279 | 0.226 | 1         | H-cluster1 |
| TRANK1   | 0.006522  | 0.28644  | 0.279 | 0.236 | 1         | H-cluster1 |
| KIF16B   | 0.00732   | 0.265636 | 0.259 | 0.212 | 1         | H-cluster1 |
| ZNF248   | 0.007514  | 0.26757  | 0.269 | 0.22  | 1         | H-cluster1 |
| KCTD3    | 0.007938  | 0.270874 | 0.339 | 0.295 | 1         | H-cluster1 |
| CCDC91   | 0.008518  | 0.273704 | 0.341 | 0.301 | 1         | H-cluster1 |
| CNTLN    | 0.008672  | 0.261391 | 0.451 | 0.427 | 1         | H-cluster1 |
| PUM1     | 0.009284  | 0.273682 | 0.517 | 0.518 | 1         | H-cluster1 |
| MAGI1    | 0.009294  | 0.377799 | 0.267 | 0.223 | 1         | H-cluster1 |
| HP1BP3   | 0.009576  | 0.257632 | 0.489 | 0.477 | 1         | H-cluster1 |
| SEMA3C   | 2.01E-115 | 1.5404   | 0.963 | 0.415 | 3.76E-111 | H-cluster2 |
| FBN1     | 7.71E-79  | 0.972516 | 0.971 | 0.766 | 1.44E-74  | H-cluster2 |
| PLXDC2   | 3.86E-67  | 1.074875 | 0.947 | 0.752 | 7.21E-63  | H-cluster2 |
| CREB5    | 3.99E-67  | 1.064965 | 0.841 | 0.365 | 7.46E-63  | H-cluster2 |
| SDK1     | 9.34E-67  | 1.117885 | 0.91  | 0.623 | 1.75E-62  | H-cluster2 |
| DOCK4    | 2.28E-65  | 1.006396 | 0.92  | 0.758 | 4.26E-61  | H-cluster2 |
| KCNAB1   | 2.84E-63  | 1.374879 | 0.66  | 0.195 | 5.31E-59  | H-cluster2 |
| KCNB2    | 4.00E-61  | 1.391225 | 0.634 | 0.195 | 7.48E-57  | H-cluster2 |
| FRMD4A   | 1.37E-60  | 0.978033 | 0.841 | 0.488 | 2.56E-56  | H-cluster2 |

|          |          |          |       |       |          |            |
|----------|----------|----------|-------|-------|----------|------------|
| PLCB1    | 1.29E-58 | 0.965614 | 0.851 | 0.445 | 2.41E-54 | H-cluster2 |
| SMURF2   | 1.15E-54 | 1.039717 | 0.83  | 0.472 | 2.16E-50 | H-cluster2 |
| STK32B   | 2.36E-53 | 1.144832 | 0.637 | 0.224 | 4.41E-49 | H-cluster2 |
| TBC1D12  | 1.99E-52 | 0.982028 | 0.692 | 0.305 | 3.71E-48 | H-cluster2 |
| DST      | 2.24E-52 | 0.724279 | 0.891 | 0.724 | 4.19E-48 | H-cluster2 |
| TRIO     | 5.09E-51 | 0.881554 | 0.881 | 0.654 | 9.52E-47 | H-cluster2 |
| STON2    | 3.41E-50 | 1.050869 | 0.607 | 0.212 | 6.37E-46 | H-cluster2 |
| ADAMTS6  | 1.54E-46 | 1.22838  | 0.485 | 0.13  | 2.89E-42 | H-cluster2 |
| HMCN1    | 3.12E-44 | 1.114794 | 0.626 | 0.269 | 5.84E-40 | H-cluster2 |
| SLC4A4   | 1.85E-39 | 0.911635 | 0.504 | 0.166 | 3.46E-35 | H-cluster2 |
| MFAP5    | 1.34E-37 | 0.518518 | 0.753 | 0.333 | 2.51E-33 | H-cluster2 |
| HUNK     | 2.73E-36 | 0.831972 | 0.451 | 0.138 | 5.10E-32 | H-cluster2 |
| KIRREL3  | 1.57E-35 | 1.150597 | 0.345 | 0.078 | 2.93E-31 | H-cluster2 |
| TMTC1    | 2.62E-35 | 0.909875 | 0.621 | 0.282 | 4.91E-31 | H-cluster2 |
| CD55     | 3.03E-35 | 0.610085 | 0.663 | 0.294 | 5.67E-31 | H-cluster2 |
| CAMK1D   | 3.54E-35 | 0.875224 | 0.698 | 0.377 | 6.62E-31 | H-cluster2 |
| NTM      | 9.80E-35 | 0.820942 | 0.666 | 0.332 | 1.83E-30 | H-cluster2 |
| NHSL1    | 2.05E-34 | 0.736638 | 0.655 | 0.323 | 3.84E-30 | H-cluster2 |
| TGFBR3   | 3.15E-34 | 0.859013 | 0.801 | 0.577 | 5.90E-30 | H-cluster2 |
| ARHGEF3  | 1.17E-33 | 0.838464 | 0.663 | 0.371 | 2.19E-29 | H-cluster2 |
| ZEB1     | 1.25E-33 | 0.588028 | 0.939 | 0.826 | 2.34E-29 | H-cluster2 |
| DPP4     | 6.57E-33 | 0.779406 | 0.329 | 0.075 | 1.23E-28 | H-cluster2 |
| HMCN2    | 1.89E-32 | 0.95172  | 0.469 | 0.174 | 3.54E-28 | H-cluster2 |
| PXDNL    | 3.49E-32 | 0.848979 | 0.531 | 0.224 | 6.53E-28 | H-cluster2 |
| FHOD3    | 4.52E-32 | 0.823978 | 0.557 | 0.234 | 8.45E-28 | H-cluster2 |
| PHLPP1   | 5.98E-32 | 0.82328  | 0.65  | 0.348 | 1.12E-27 | H-cluster2 |
| PRG4     | 1.33E-30 | 0.487643 | 0.414 | 0.121 | 2.49E-26 | H-cluster2 |
| AGAP1    | 1.95E-30 | 0.702316 | 0.772 | 0.535 | 3.64E-26 | H-cluster2 |
| DPYSL3   | 3.82E-30 | 0.967076 | 0.618 | 0.339 | 7.14E-26 | H-cluster2 |
| ITGA11   | 6.28E-30 | 0.727625 | 0.623 | 0.317 | 1.17E-25 | H-cluster2 |
| CNTN4    | 4.48E-29 | 0.766051 | 0.674 | 0.373 | 8.38E-25 | H-cluster2 |
| EHBP1    | 2.14E-28 | 0.627443 | 0.838 | 0.643 | 4.01E-24 | H-cluster2 |
| PDGFD    | 3.81E-28 | 0.769802 | 0.658 | 0.351 | 7.12E-24 | H-cluster2 |
| LGR4     | 8.60E-28 | 0.798057 | 0.469 | 0.185 | 1.61E-23 | H-cluster2 |
| KANK1    | 1.92E-27 | 1.025856 | 0.642 | 0.39  | 3.60E-23 | H-cluster2 |
| GUCY1A2  | 8.90E-27 | 0.744176 | 0.416 | 0.148 | 1.66E-22 | H-cluster2 |
| GAS7     | 1.27E-26 | 0.520368 | 0.796 | 0.606 | 2.38E-22 | H-cluster2 |
| AUTS2    | 2.09E-26 | 0.44259  | 0.968 | 0.898 | 3.91E-22 | H-cluster2 |
| LIMCH1   | 9.53E-26 | 0.708151 | 0.647 | 0.385 | 1.78E-21 | H-cluster2 |
| KIAA1671 | 9.88E-26 | 0.697676 | 0.472 | 0.198 | 1.85E-21 | H-cluster2 |
| MAST4    | 1.17E-25 | 0.777214 | 0.676 | 0.454 | 2.19E-21 | H-cluster2 |
| CARMIL1  | 1.53E-25 | 0.667447 | 0.708 | 0.473 | 2.86E-21 | H-cluster2 |
| ADGRD1   | 1.61E-25 | 0.664218 | 0.544 | 0.26  | 3.02E-21 | H-cluster2 |
| PSD3     | 2.30E-25 | 0.678525 | 0.653 | 0.402 | 4.31E-21 | H-cluster2 |
| RERG     | 2.31E-25 | 0.861592 | 0.289 | 0.077 | 4.33E-21 | H-cluster2 |
| UTRN     | 4.82E-25 | 0.506845 | 0.836 | 0.748 | 9.02E-21 | H-cluster2 |
| PCOLCE2  | 1.13E-24 | 0.71309  | 0.599 | 0.316 | 2.12E-20 | H-cluster2 |

|          |          |          |       |       |          |            |
|----------|----------|----------|-------|-------|----------|------------|
| ADAMTSL1 | 1.38E-24 | 0.724945 | 0.706 | 0.466 | 2.57E-20 | H-cluster2 |
| ADAMTS5  | 1.52E-24 | 0.969251 | 0.541 | 0.29  | 2.84E-20 | H-cluster2 |
| VCAN     | 4.65E-24 | 1.046401 | 0.56  | 0.315 | 8.70E-20 | H-cluster2 |
| ANOS1    | 5.84E-24 | 0.834983 | 0.342 | 0.118 | 1.09E-19 | H-cluster2 |
| PCSK6    | 7.49E-24 | 0.790136 | 0.56  | 0.305 | 1.40E-19 | H-cluster2 |
| EXT1     | 1.71E-23 | 0.600077 | 0.854 | 0.705 | 3.21E-19 | H-cluster2 |
| APBB1IP  | 2.58E-23 | 0.701216 | 0.592 | 0.333 | 4.83E-19 | H-cluster2 |
| ADAMTS16 | 2.81E-23 | 0.834023 | 0.281 | 0.08  | 5.26E-19 | H-cluster2 |
| ASAP2    | 4.40E-23 | 0.629464 | 0.674 | 0.426 | 8.23E-19 | H-cluster2 |
| SH3PXD2B | 1.23E-22 | 0.728819 | 0.613 | 0.382 | 2.31E-18 | H-cluster2 |
| PDE7A    | 1.27E-22 | 0.661056 | 0.637 | 0.391 | 2.37E-18 | H-cluster2 |
| PAK3     | 2.56E-22 | 0.817474 | 0.477 | 0.242 | 4.78E-18 | H-cluster2 |
| GRK5     | 3.23E-22 | 0.597279 | 0.759 | 0.569 | 6.05E-18 | H-cluster2 |
| ABLIM1   | 6.28E-22 | 0.578895 | 0.716 | 0.503 | 1.17E-17 | H-cluster2 |
| PAMR1    | 8.66E-22 | 0.714202 | 0.467 | 0.221 | 1.62E-17 | H-cluster2 |
| LMX1A    | 2.51E-21 | 0.626731 | 0.361 | 0.136 | 4.70E-17 | H-cluster2 |
| TRERF1   | 2.55E-21 | 0.626496 | 0.645 | 0.422 | 4.76E-17 | H-cluster2 |
| FGF14    | 9.05E-20 | 0.56672  | 0.626 | 0.372 | 1.69E-15 | H-cluster2 |
| SRPK2    | 1.73E-19 | 0.595158 | 0.698 | 0.484 | 3.24E-15 | H-cluster2 |
| ARHGAP29 | 1.75E-19 | 0.724235 | 0.501 | 0.27  | 3.27E-15 | H-cluster2 |
| FAR2     | 1.92E-19 | 0.676869 | 0.308 | 0.111 | 3.60E-15 | H-cluster2 |
| THSD4    | 4.82E-19 | 0.771116 | 0.329 | 0.13  | 9.01E-15 | H-cluster2 |
| PLXNA2   | 4.84E-19 | 0.58738  | 0.324 | 0.123 | 9.05E-15 | H-cluster2 |
| LTBP2    | 8.13E-19 | 0.623375 | 0.361 | 0.149 | 1.52E-14 | H-cluster2 |
| PRDM6    | 1.10E-18 | 0.610053 | 0.411 | 0.184 | 2.07E-14 | H-cluster2 |
| HDAC7    | 1.22E-18 | 0.590897 | 0.507 | 0.275 | 2.28E-14 | H-cluster2 |
| SULF1    | 1.28E-18 | 0.617586 | 0.623 | 0.399 | 2.40E-14 | H-cluster2 |
| MMP16    | 1.39E-18 | 0.704802 | 0.31  | 0.117 | 2.60E-14 | H-cluster2 |
| JAZF1    | 1.91E-18 | 0.56782  | 0.592 | 0.367 | 3.58E-14 | H-cluster2 |
| ADK      | 2.73E-18 | 0.551965 | 0.743 | 0.574 | 5.11E-14 | H-cluster2 |
| ZNF521   | 5.66E-18 | 0.482457 | 0.706 | 0.512 | 1.06E-13 | H-cluster2 |
| MYOF     | 1.17E-17 | 0.542056 | 0.613 | 0.389 | 2.19E-13 | H-cluster2 |
| PDE1C    | 2.24E-17 | 0.607796 | 0.422 | 0.203 | 4.20E-13 | H-cluster2 |
| GALNT17  | 3.20E-17 | 0.705251 | 0.324 | 0.13  | 5.98E-13 | H-cluster2 |
| NAV3     | 4.17E-17 | 0.490233 | 0.814 | 0.626 | 7.79E-13 | H-cluster2 |
| ZNF385B  | 4.42E-17 | 0.741705 | 0.432 | 0.22  | 8.26E-13 | H-cluster2 |
| TNXB     | 5.53E-17 | 0.28668  | 0.844 | 0.668 | 1.03E-12 | H-cluster2 |
| PCNX2    | 7.07E-17 | 0.549863 | 0.562 | 0.343 | 1.32E-12 | H-cluster2 |
| LTBP1    | 8.16E-17 | 0.539764 | 0.459 | 0.234 | 1.53E-12 | H-cluster2 |
| VPS13B   | 1.27E-16 | 0.440407 | 0.841 | 0.762 | 2.37E-12 | H-cluster2 |
| PARD3B   | 1.46E-16 | 0.455912 | 0.881 | 0.76  | 2.73E-12 | H-cluster2 |
| SORBS2   | 1.96E-16 | 0.559803 | 0.353 | 0.151 | 3.66E-12 | H-cluster2 |
| ITGBL1   | 5.14E-16 | 0.677259 | 0.305 | 0.124 | 9.61E-12 | H-cluster2 |
| ARHGAP20 | 8.62E-16 | 0.633489 | 0.501 | 0.304 | 1.61E-11 | H-cluster2 |
| STARD9   | 9.50E-16 | 0.544463 | 0.653 | 0.475 | 1.78E-11 | H-cluster2 |
| FNDC1    | 1.05E-15 | 0.63451  | 0.252 | 0.09  | 1.97E-11 | H-cluster2 |
| ITPR3    | 1.08E-15 | 0.445328 | 0.395 | 0.191 | 2.03E-11 | H-cluster2 |



|          |          |          |       |       |          |            |
|----------|----------|----------|-------|-------|----------|------------|
| MYO9A    | 1.18E-15 | 0.443588 | 0.759 | 0.633 | 2.22E-11 | H-cluster2 |
| PTGIS    | 1.47E-15 | 0.560498 | 0.666 | 0.47  | 2.76E-11 | H-cluster2 |
| NCKAP5   | 3.08E-15 | 0.764039 | 0.286 | 0.116 | 5.77E-11 | H-cluster2 |
| TENM1    | 5.68E-15 | 0.530344 | 0.271 | 0.102 | 1.06E-10 | H-cluster2 |
| CACNB4   | 6.72E-15 | 0.590368 | 0.286 | 0.116 | 1.26E-10 | H-cluster2 |
| OSBPL10  | 8.45E-15 | 0.580875 | 0.52  | 0.309 | 1.58E-10 | H-cluster2 |
| HRH1     | 8.90E-15 | 0.451053 | 0.329 | 0.139 | 1.66E-10 | H-cluster2 |
| ADD3     | 1.05E-14 | 0.369579 | 0.841 | 0.739 | 1.96E-10 | H-cluster2 |
| RBMS1    | 1.05E-14 | 0.460556 | 0.798 | 0.701 | 1.97E-10 | H-cluster2 |
| SNX24    | 1.33E-14 | 0.466089 | 0.371 | 0.18  | 2.50E-10 | H-cluster2 |
| CDK6     | 4.07E-14 | 0.501261 | 0.401 | 0.206 | 7.62E-10 | H-cluster2 |
| EYA4     | 4.09E-14 | 0.513743 | 0.302 | 0.128 | 7.65E-10 | H-cluster2 |
| RAP1B    | 4.64E-14 | 0.460471 | 0.692 | 0.536 | 8.68E-10 | H-cluster2 |
| RECK     | 5.18E-14 | 0.518176 | 0.538 | 0.341 | 9.69E-10 | H-cluster2 |
| SH3D19   | 5.27E-14 | 0.428341 | 0.814 | 0.709 | 9.86E-10 | H-cluster2 |
| ITGB5    | 5.38E-14 | 0.500316 | 0.501 | 0.305 | 1.01E-09 | H-cluster2 |
| GLIPR2   | 6.36E-14 | 0.497282 | 0.313 | 0.143 | 1.19E-09 | H-cluster2 |
| DNM1     | 6.58E-14 | 0.470086 | 0.581 | 0.399 | 1.23E-09 | H-cluster2 |
| ANTXR1   | 7.02E-14 | 0.533015 | 0.618 | 0.45  | 1.31E-09 | H-cluster2 |
| LOXL1    | 8.74E-14 | 0.566656 | 0.294 | 0.128 | 1.64E-09 | H-cluster2 |
| SLC37A3  | 8.75E-14 | 0.460281 | 0.44  | 0.248 | 1.64E-09 | H-cluster2 |
| KIAA1456 | 1.42E-13 | 0.496071 | 0.302 | 0.135 | 2.65E-09 | H-cluster2 |
| SHISA6   | 2.19E-13 | 0.485189 | 0.252 | 0.097 | 4.09E-09 | H-cluster2 |
| EFNA5    | 2.59E-13 | 0.618839 | 0.57  | 0.382 | 4.85E-09 | H-cluster2 |
| DDX60L   | 4.48E-13 | 0.485262 | 0.406 | 0.221 | 8.38E-09 | H-cluster2 |
| MYO1E    | 4.85E-13 | 0.520276 | 0.44  | 0.25  | 9.08E-09 | H-cluster2 |
| DBN1     | 4.93E-13 | 0.327536 | 0.297 | 0.128 | 9.23E-09 | H-cluster2 |
| HERC4    | 5.25E-13 | 0.446664 | 0.729 | 0.612 | 9.82E-09 | H-cluster2 |
| ELMO1    | 5.37E-13 | 0.470948 | 0.706 | 0.577 | 1.01E-08 | H-cluster2 |
| PDGFC    | 5.64E-13 | 0.488025 | 0.26  | 0.106 | 1.06E-08 | H-cluster2 |
| EVI5     | 5.68E-13 | 0.438988 | 0.671 | 0.495 | 1.06E-08 | H-cluster2 |
| CDC42BPA | 7.49E-13 | 0.463787 | 0.682 | 0.534 | 1.40E-08 | H-cluster2 |
| PALM     | 9.56E-13 | 0.441358 | 0.432 | 0.249 | 1.79E-08 | H-cluster2 |
| PI16     | 1.31E-12 | 0.499805 | 0.408 | 0.223 | 2.45E-08 | H-cluster2 |
| CD34     | 1.71E-12 | 0.407384 | 0.589 | 0.399 | 3.20E-08 | H-cluster2 |
| FGD5     | 1.85E-12 | 0.489721 | 0.427 | 0.248 | 3.46E-08 | H-cluster2 |
| NEDD9    | 1.90E-12 | 0.464301 | 0.308 | 0.143 | 3.55E-08 | H-cluster2 |
| SMIM14   | 1.93E-12 | 0.486173 | 0.554 | 0.375 | 3.61E-08 | H-cluster2 |
| AXL      | 2.17E-12 | 0.381445 | 0.645 | 0.46  | 4.06E-08 | H-cluster2 |
| PROCR    | 3.09E-12 | 0.456569 | 0.546 | 0.352 | 5.79E-08 | H-cluster2 |
| ATP2B1   | 3.23E-12 | 0.436235 | 0.462 | 0.279 | 6.04E-08 | H-cluster2 |
| ARHGAP28 | 3.72E-12 | 0.582969 | 0.31  | 0.151 | 6.96E-08 | H-cluster2 |
| ADAMTS2  | 3.85E-12 | 0.492612 | 0.432 | 0.253 | 7.20E-08 | H-cluster2 |
| TNS1     | 3.94E-12 | 0.415115 | 0.541 | 0.355 | 7.37E-08 | H-cluster2 |
| MID1     | 4.05E-12 | 0.564994 | 0.477 | 0.297 | 7.58E-08 | H-cluster2 |
| PXN      | 4.51E-12 | 0.424293 | 0.462 | 0.282 | 8.44E-08 | H-cluster2 |
| WDFY3    | 4.66E-12 | 0.379969 | 0.729 | 0.591 | 8.71E-08 | H-cluster2 |

|            |          |          |       |       |          |            |
|------------|----------|----------|-------|-------|----------|------------|
| USP54      | 6.13E-12 | 0.361525 | 0.374 | 0.197 | 1.15E-07 | H-cluster2 |
| NIPAL2     | 1.14E-11 | 0.654719 | 0.342 | 0.183 | 2.13E-07 | H-cluster2 |
| GFPT2      | 1.22E-11 | 0.281287 | 0.592 | 0.411 | 2.29E-07 | H-cluster2 |
| TACC2      | 1.94E-11 | 0.366114 | 0.34  | 0.174 | 3.64E-07 | H-cluster2 |
| ST7        | 2.52E-11 | 0.474468 | 0.552 | 0.372 | 4.72E-07 | H-cluster2 |
| NLGN4Y     | 4.22E-11 | 0.404998 | 0.374 | 0.198 | 7.89E-07 | H-cluster2 |
| WLS        | 4.78E-11 | 0.462099 | 0.305 | 0.153 | 8.94E-07 | H-cluster2 |
| MTHFD1L    | 5.23E-11 | 0.435724 | 0.305 | 0.15  | 9.78E-07 | H-cluster2 |
| ROBO2      | 5.35E-11 | 0.763939 | 0.525 | 0.37  | 1.00E-06 | H-cluster2 |
| EPB41L3    | 5.51E-11 | 0.61256  | 0.618 | 0.476 | 1.03E-06 | H-cluster2 |
| KLF12      | 5.54E-11 | 0.376935 | 0.615 | 0.424 | 1.04E-06 | H-cluster2 |
| EBF2       | 5.59E-11 | 0.458716 | 0.812 | 0.731 | 1.05E-06 | H-cluster2 |
| AC005154.6 | 6.36E-11 | 0.50727  | 0.39  | 0.229 | 1.19E-06 | H-cluster2 |
| FER        | 6.71E-11 | 0.356954 | 0.751 | 0.658 | 1.26E-06 | H-cluster2 |
| ZMIZ1      | 8.17E-11 | 0.426017 | 0.483 | 0.311 | 1.53E-06 | H-cluster2 |
| SPSB4      | 8.24E-11 | 0.427776 | 0.255 | 0.115 | 1.54E-06 | H-cluster2 |
| PDLIM5     | 9.03E-11 | 0.448839 | 0.576 | 0.41  | 1.69E-06 | H-cluster2 |
| STXBP6     | 2.43E-10 | 0.443492 | 0.443 | 0.271 | 4.55E-06 | H-cluster2 |
| RASAL2     | 3.50E-10 | 0.36983  | 0.347 | 0.189 | 6.54E-06 | H-cluster2 |
| GLS        | 4.03E-10 | 0.519552 | 0.629 | 0.522 | 7.54E-06 | H-cluster2 |
| SH3RF3     | 4.13E-10 | 0.409205 | 0.472 | 0.302 | 7.72E-06 | H-cluster2 |
| COBLL1     | 4.28E-10 | 0.593639 | 0.324 | 0.177 | 8.00E-06 | H-cluster2 |
| L3MBTL4    | 6.00E-10 | 0.469422 | 0.308 | 0.162 | 1.12E-05 | H-cluster2 |
| SLC41A2    | 6.24E-10 | 0.297661 | 0.345 | 0.185 | 1.17E-05 | H-cluster2 |
| ZFH3       | 8.83E-10 | 0.385893 | 0.592 | 0.44  | 1.65E-05 | H-cluster2 |
| TGFBR1     | 1.07E-09 | 0.414303 | 0.374 | 0.222 | 2.00E-05 | H-cluster2 |
| LVRN       | 1.23E-09 | 0.471562 | 0.302 | 0.16  | 2.29E-05 | H-cluster2 |
| CORO1C     | 1.58E-09 | 0.367433 | 0.334 | 0.186 | 2.96E-05 | H-cluster2 |
| TMEM131L   | 1.60E-09 | 0.466895 | 0.467 | 0.308 | 2.99E-05 | H-cluster2 |
| ST3GAL5    | 1.65E-09 | 0.502986 | 0.432 | 0.295 | 3.09E-05 | H-cluster2 |
| SRGAP2B    | 1.67E-09 | 0.32675  | 0.369 | 0.208 | 3.12E-05 | H-cluster2 |
| COL14A1    | 1.77E-09 | 0.525157 | 0.387 | 0.227 | 3.32E-05 | H-cluster2 |
| DISP1      | 1.87E-09 | 0.439954 | 0.321 | 0.177 | 3.49E-05 | H-cluster2 |
| BICD1      | 1.88E-09 | 0.377214 | 0.39  | 0.239 | 3.52E-05 | H-cluster2 |
| PLEKHG1    | 2.60E-09 | 0.346135 | 0.334 | 0.18  | 4.87E-05 | H-cluster2 |
| TENM3      | 2.61E-09 | 0.577184 | 0.35  | 0.209 | 4.88E-05 | H-cluster2 |
| TTC7A      | 2.65E-09 | 0.35582  | 0.573 | 0.41  | 4.95E-05 | H-cluster2 |
| STK39      | 2.99E-09 | 0.443747 | 0.448 | 0.309 | 5.59E-05 | H-cluster2 |
| RRAS2      | 3.20E-09 | 0.444496 | 0.385 | 0.235 | 5.99E-05 | H-cluster2 |
| ZNF423     | 3.50E-09 | 0.418024 | 0.424 | 0.271 | 6.55E-05 | H-cluster2 |
| GLI3       | 3.60E-09 | 0.360474 | 0.66  | 0.523 | 6.74E-05 | H-cluster2 |
| EEF2K      | 3.95E-09 | 0.435878 | 0.454 | 0.299 | 7.39E-05 | H-cluster2 |
| GALNT10    | 3.98E-09 | 0.27191  | 0.406 | 0.236 | 7.44E-05 | H-cluster2 |
| DENND2A    | 4.34E-09 | 0.354041 | 0.743 | 0.655 | 8.11E-05 | H-cluster2 |
| IQSEC1     | 4.39E-09 | 0.343104 | 0.292 | 0.154 | 8.20E-05 | H-cluster2 |
| GALNT12    | 4.52E-09 | 0.301849 | 0.252 | 0.124 | 8.45E-05 | H-cluster2 |
| ITSN2      | 4.94E-09 | 0.450583 | 0.586 | 0.43  | 9.25E-05 | H-cluster2 |

|          |          |          |       |       |          |            |
|----------|----------|----------|-------|-------|----------|------------|
| FBXL2    | 4.95E-09 | 0.340061 | 0.305 | 0.166 | 9.26E-05 | H-cluster2 |
| MN1      | 5.10E-09 | 0.325898 | 0.289 | 0.154 | 9.54E-05 | H-cluster2 |
| TTLL11   | 5.16E-09 | 0.408025 | 0.305 | 0.168 | 9.64E-05 | H-cluster2 |
| GPSM2    | 5.33E-09 | 0.394129 | 0.34  | 0.198 | 9.97E-05 | H-cluster2 |
| KMT2C    | 5.47E-09 | 0.279904 | 0.769 | 0.674 | 0.000102 | H-cluster2 |
| FN1      | 5.71E-09 | 0.288775 | 0.501 | 0.32  | 0.000107 | H-cluster2 |
| ADSS     | 5.90E-09 | 0.412194 | 0.284 | 0.153 | 0.00011  | H-cluster2 |
| TRAK1    | 7.81E-09 | 0.348483 | 0.414 | 0.26  | 0.000146 | H-cluster2 |
| ACSL3    | 8.24E-09 | 0.428901 | 0.464 | 0.328 | 0.000154 | H-cluster2 |
| EMILIN2  | 8.87E-09 | 0.256563 | 0.337 | 0.184 | 0.000166 | H-cluster2 |
| PTK2     | 8.95E-09 | 0.298797 | 0.753 | 0.665 | 0.000167 | H-cluster2 |
| DLGAP4   | 9.43E-09 | 0.39335  | 0.424 | 0.273 | 0.000176 | H-cluster2 |
| SVIL     | 1.12E-08 | 0.400396 | 0.501 | 0.354 | 0.000209 | H-cluster2 |
| C11orf80 | 1.24E-08 | 0.421613 | 0.289 | 0.153 | 0.000232 | H-cluster2 |
| TPST1    | 1.28E-08 | 0.332299 | 0.653 | 0.507 | 0.000239 | H-cluster2 |
| PPP1R12B | 1.76E-08 | 0.384824 | 0.557 | 0.415 | 0.000328 | H-cluster2 |
| APBA1    | 2.23E-08 | 0.386766 | 0.3   | 0.165 | 0.000417 | H-cluster2 |
| ROBO1    | 2.34E-08 | 0.369024 | 0.735 | 0.621 | 0.000438 | H-cluster2 |
| HEG1     | 2.46E-08 | 0.351635 | 0.464 | 0.307 | 0.000461 | H-cluster2 |
| SPTAN1   | 2.65E-08 | 0.322345 | 0.538 | 0.391 | 0.000495 | H-cluster2 |
| XAF1     | 2.76E-08 | 0.338141 | 0.268 | 0.144 | 0.000516 | H-cluster2 |
| SRGAP2   | 2.86E-08 | 0.422593 | 0.44  | 0.301 | 0.000535 | H-cluster2 |
| PHLDB2   | 3.01E-08 | 0.30006  | 0.597 | 0.44  | 0.000564 | H-cluster2 |
| CDC42BPB | 3.17E-08 | 0.359735 | 0.464 | 0.318 | 0.000592 | H-cluster2 |
| EPB41L2  | 3.23E-08 | 0.281863 | 0.833 | 0.742 | 0.000603 | H-cluster2 |
| GALNT16  | 3.32E-08 | 0.34723  | 0.276 | 0.15  | 0.00062  | H-cluster2 |
| STK38    | 3.45E-08 | 0.362552 | 0.57  | 0.434 | 0.000646 | H-cluster2 |
| TTLL7    | 3.68E-08 | 0.430144 | 0.284 | 0.158 | 0.000689 | H-cluster2 |
| ANXA4    | 3.96E-08 | 0.378092 | 0.491 | 0.349 | 0.00074  | H-cluster2 |
| ELN      | 4.01E-08 | 0.431305 | 0.488 | 0.348 | 0.00075  | H-cluster2 |
| TTC3     | 4.58E-08 | 0.357965 | 0.546 | 0.423 | 0.000857 | H-cluster2 |
| MAP4     | 4.59E-08 | 0.314626 | 0.714 | 0.629 | 0.000858 | H-cluster2 |
| MAN2A1   | 5.28E-08 | 0.379375 | 0.464 | 0.324 | 0.000988 | H-cluster2 |
| STARD13  | 5.41E-08 | 0.380962 | 0.568 | 0.431 | 0.001012 | H-cluster2 |
| MCOLN3   | 5.73E-08 | 0.333935 | 0.302 | 0.171 | 0.001072 | H-cluster2 |
| STK3     | 6.41E-08 | 0.310572 | 0.732 | 0.67  | 0.001199 | H-cluster2 |
| APBB2    | 6.71E-08 | 0.275188 | 0.743 | 0.61  | 0.001255 | H-cluster2 |
| PDLIM7   | 7.00E-08 | 0.361778 | 0.297 | 0.172 | 0.001309 | H-cluster2 |
| DOCK1    | 7.72E-08 | 0.282391 | 0.714 | 0.593 | 0.001444 | H-cluster2 |
| ABCC1    | 8.25E-08 | 0.406581 | 0.499 | 0.362 | 0.001542 | H-cluster2 |
| MCC      | 8.32E-08 | 0.435918 | 0.385 | 0.248 | 0.001556 | H-cluster2 |
| PAM      | 8.51E-08 | 0.322382 | 0.692 | 0.582 | 0.001592 | H-cluster2 |
| PKD2     | 9.32E-08 | 0.361711 | 0.597 | 0.472 | 0.001743 | H-cluster2 |
| ADGRG2   | 9.49E-08 | 0.326013 | 0.255 | 0.134 | 0.001775 | H-cluster2 |
| SCARA5   | 1.40E-07 | 0.305912 | 0.565 | 0.403 | 0.00262  | H-cluster2 |
| NEO1     | 1.55E-07 | 0.392332 | 0.305 | 0.18  | 0.002906 | H-cluster2 |
| RADIL    | 1.63E-07 | 0.341651 | 0.321 | 0.192 | 0.003044 | H-cluster2 |

|          |          |          |       |       |          |            |
|----------|----------|----------|-------|-------|----------|------------|
| PLCE1    | 1.68E-07 | 0.370748 | 0.257 | 0.14  | 0.003138 | H-cluster2 |
| LSP1     | 1.72E-07 | 0.296806 | 0.554 | 0.416 | 0.003226 | H-cluster2 |
| CMIP     | 1.95E-07 | 0.284421 | 0.406 | 0.259 | 0.003645 | H-cluster2 |
| CPXM2    | 1.98E-07 | 0.396221 | 0.334 | 0.212 | 0.003705 | H-cluster2 |
| MKL1     | 2.10E-07 | 0.278543 | 0.639 | 0.508 | 0.003933 | H-cluster2 |
| AFAP1    | 2.18E-07 | 0.391295 | 0.358 | 0.233 | 0.004082 | H-cluster2 |
| NOX4     | 2.61E-07 | 0.539027 | 0.626 | 0.56  | 0.004873 | H-cluster2 |
| DENND4C  | 2.71E-07 | 0.369964 | 0.634 | 0.527 | 0.005062 | H-cluster2 |
| AP3S1    | 2.74E-07 | 0.354876 | 0.411 | 0.273 | 0.005118 | H-cluster2 |
| FAM171A1 | 2.79E-07 | 0.381143 | 0.305 | 0.181 | 0.005209 | H-cluster2 |
| FLRT2    | 3.01E-07 | 0.368876 | 0.599 | 0.474 | 0.005622 | H-cluster2 |
| HSPA12A  | 3.45E-07 | 0.331851 | 0.294 | 0.174 | 0.006453 | H-cluster2 |
| TAOK1    | 3.81E-07 | 0.332093 | 0.589 | 0.466 | 0.00713  | H-cluster2 |
| FAM69A   | 4.00E-07 | 0.326492 | 0.398 | 0.259 | 0.007476 | H-cluster2 |
| SUN1     | 4.11E-07 | 0.308746 | 0.438 | 0.306 | 0.007691 | H-cluster2 |
| MARK3    | 4.13E-07 | 0.304209 | 0.679 | 0.584 | 0.007734 | H-cluster2 |
| CCDC186  | 4.54E-07 | 0.343707 | 0.308 | 0.189 | 0.008497 | H-cluster2 |
| SWAP70   | 5.00E-07 | 0.394302 | 0.401 | 0.27  | 0.009346 | H-cluster2 |
| KIF13B   | 6.03E-07 | 0.318544 | 0.308 | 0.183 | 0.011284 | H-cluster2 |
| EPB41L4A | 6.51E-07 | 0.338066 | 0.374 | 0.25  | 0.012185 | H-cluster2 |
| LRRC17   | 6.60E-07 | 0.306042 | 0.252 | 0.14  | 0.012339 | H-cluster2 |
| ELOVL6   | 6.60E-07 | 0.250263 | 0.257 | 0.143 | 0.012351 | H-cluster2 |
| KPNA1    | 6.74E-07 | 0.386324 | 0.337 | 0.216 | 0.01261  | H-cluster2 |
| PDE4DIP  | 6.88E-07 | 0.408163 | 0.578 | 0.469 | 0.01287  | H-cluster2 |
| CPQ      | 6.97E-07 | 0.339901 | 0.708 | 0.64  | 0.013044 | H-cluster2 |
| UBE2E2   | 7.34E-07 | 0.307464 | 0.645 | 0.551 | 0.01373  | H-cluster2 |
| ATP11A   | 7.84E-07 | 0.285876 | 0.472 | 0.333 | 0.014657 | H-cluster2 |
| TPM1     | 8.81E-07 | 0.339557 | 0.401 | 0.271 | 0.01647  | H-cluster2 |
| USP9Y    | 9.70E-07 | 0.348126 | 0.432 | 0.301 | 0.018144 | H-cluster2 |
| BASP1    | 9.98E-07 | 0.308025 | 0.305 | 0.188 | 0.018664 | H-cluster2 |
| SIPA1L3  | 1.03E-06 | 0.367357 | 0.419 | 0.292 | 0.019183 | H-cluster2 |
| AP3B1    | 1.04E-06 | 0.306179 | 0.576 | 0.454 | 0.019465 | H-cluster2 |
| SGMS1    | 1.07E-06 | 0.326419 | 0.507 | 0.374 | 0.020088 | H-cluster2 |
| WWC2     | 1.08E-06 | 0.355282 | 0.499 | 0.372 | 0.020178 | H-cluster2 |
| TRAPPC10 | 1.36E-06 | 0.294848 | 0.31  | 0.194 | 0.025399 | H-cluster2 |
| COL12A1  | 1.58E-06 | 0.305734 | 0.443 | 0.308 | 0.029596 | H-cluster2 |
| TRIOBP   | 1.65E-06 | 0.251321 | 0.382 | 0.256 | 0.030786 | H-cluster2 |
| ADD1     | 1.68E-06 | 0.323754 | 0.536 | 0.428 | 0.03136  | H-cluster2 |
| DIAPH1   | 1.75E-06 | 0.363824 | 0.387 | 0.255 | 0.032652 | H-cluster2 |
| CEP152   | 1.88E-06 | 0.340978 | 0.281 | 0.169 | 0.035149 | H-cluster2 |
| RAB30    | 2.64E-06 | 0.355469 | 0.408 | 0.28  | 0.049387 | H-cluster2 |
| ADAMTSL4 | 2.64E-06 | 0.301426 | 0.297 | 0.184 | 0.049461 | H-cluster2 |
| FBXL20   | 2.66E-06 | 0.317992 | 0.589 | 0.489 | 0.049805 | H-cluster2 |
| USP32    | 2.73E-06 | 0.392793 | 0.493 | 0.377 | 0.050984 | H-cluster2 |
| DNMBP    | 2.75E-06 | 0.320672 | 0.456 | 0.335 | 0.051522 | H-cluster2 |
| PDE10A   | 2.78E-06 | 0.396059 | 0.358 | 0.238 | 0.051941 | H-cluster2 |
| CORO2B   | 2.98E-06 | 0.289808 | 0.366 | 0.249 | 0.055756 | H-cluster2 |

|          |          |          |       |       |          |            |
|----------|----------|----------|-------|-------|----------|------------|
| TSC22D1  | 3.00E-06 | 0.42432  | 0.334 | 0.219 | 0.056136 | H-cluster2 |
| GLI2     | 3.43E-06 | 0.307642 | 0.31  | 0.199 | 0.064128 | H-cluster2 |
| SREBF2   | 3.46E-06 | 0.355568 | 0.321 | 0.211 | 0.064759 | H-cluster2 |
| RALGPS2  | 3.51E-06 | 0.353636 | 0.403 | 0.279 | 0.065589 | H-cluster2 |
| CCNY     | 3.59E-06 | 0.313298 | 0.562 | 0.461 | 0.067186 | H-cluster2 |
| PRKCE    | 3.74E-06 | 0.297464 | 0.525 | 0.414 | 0.06993  | H-cluster2 |
| ZNF704   | 3.92E-06 | 0.359134 | 0.515 | 0.39  | 0.07325  | H-cluster2 |
| SRGAP1   | 4.69E-06 | 0.274532 | 0.602 | 0.494 | 0.087696 | H-cluster2 |
| PPP2R2A  | 5.10E-06 | 0.328244 | 0.523 | 0.411 | 0.09533  | H-cluster2 |
| ASAP3    | 5.14E-06 | 0.292343 | 0.353 | 0.24  | 0.096122 | H-cluster2 |
| PRKD3    | 5.19E-06 | 0.269692 | 0.379 | 0.257 | 0.097019 | H-cluster2 |
| KIF2A    | 6.89E-06 | 0.283938 | 0.297 | 0.188 | 0.12883  | H-cluster2 |
| FAM49B   | 8.15E-06 | 0.259684 | 0.297 | 0.189 | 0.152496 | H-cluster2 |
| MEF2A    | 8.28E-06 | 0.272156 | 0.645 | 0.559 | 0.154953 | H-cluster2 |
| TAOK3    | 8.31E-06 | 0.326335 | 0.504 | 0.391 | 0.155481 | H-cluster2 |
| ADGRA3   | 8.40E-06 | 0.306735 | 0.363 | 0.25  | 0.157042 | H-cluster2 |
| C5orf42  | 1.02E-05 | 0.306159 | 0.525 | 0.404 | 0.19135  | H-cluster2 |
| JAG1     | 1.12E-05 | 0.37757  | 0.34  | 0.234 | 0.210296 | H-cluster2 |
| EVC      | 1.14E-05 | 0.28219  | 0.271 | 0.167 | 0.21404  | H-cluster2 |
| DOPEY1   | 1.17E-05 | 0.31391  | 0.387 | 0.272 | 0.219077 | H-cluster2 |
| MAPKAP1  | 1.27E-05 | 0.293289 | 0.414 | 0.3   | 0.23801  | H-cluster2 |
| DCBLD2   | 1.31E-05 | 0.32575  | 0.427 | 0.317 | 0.245219 | H-cluster2 |
| RUNX1    | 1.43E-05 | 0.265309 | 0.485 | 0.361 | 0.26694  | H-cluster2 |
| PBX3     | 1.45E-05 | 0.336235 | 0.528 | 0.425 | 0.271114 | H-cluster2 |
| NSF      | 1.53E-05 | 0.25846  | 0.395 | 0.276 | 0.286027 | H-cluster2 |
| CTIF     | 1.63E-05 | 0.318921 | 0.284 | 0.184 | 0.304241 | H-cluster2 |
| CCDC39   | 1.64E-05 | 0.367114 | 0.462 | 0.356 | 0.306358 | H-cluster2 |
| KANK2    | 1.66E-05 | 0.292691 | 0.361 | 0.246 | 0.310441 | H-cluster2 |
| GTDC1    | 1.67E-05 | 0.31041  | 0.472 | 0.352 | 0.311497 | H-cluster2 |
| OPTN     | 1.68E-05 | 0.310984 | 0.408 | 0.3   | 0.314073 | H-cluster2 |
| C9orf3   | 1.77E-05 | 0.309006 | 0.48  | 0.358 | 0.331235 | H-cluster2 |
| LARP1B   | 1.89E-05 | 0.27735  | 0.342 | 0.233 | 0.353548 | H-cluster2 |
| TBC1D22A | 1.98E-05 | 0.290387 | 0.523 | 0.425 | 0.370631 | H-cluster2 |
| PRKD1    | 2.26E-05 | 0.28637  | 0.451 | 0.342 | 0.422959 | H-cluster2 |
| OGDH     | 2.27E-05 | 0.250672 | 0.406 | 0.289 | 0.424258 | H-cluster2 |
| ATP2B4   | 2.48E-05 | 0.262025 | 0.44  | 0.328 | 0.463171 | H-cluster2 |
| ADAM10   | 2.54E-05 | 0.423087 | 0.422 | 0.326 | 0.474336 | H-cluster2 |
| OPHN1    | 2.61E-05 | 0.303669 | 0.692 | 0.605 | 0.488531 | H-cluster2 |
| APP      | 3.03E-05 | 0.298138 | 0.538 | 0.419 | 0.565809 | H-cluster2 |
| PPFIA1   | 3.12E-05 | 0.312    | 0.414 | 0.312 | 0.583059 | H-cluster2 |
| NOVA1    | 3.17E-05 | 0.358368 | 0.828 | 0.794 | 0.593842 | H-cluster2 |
| BTBD9    | 3.18E-05 | 0.267259 | 0.536 | 0.424 | 0.594103 | H-cluster2 |
| FAM107B  | 3.25E-05 | 0.290102 | 0.326 | 0.218 | 0.607609 | H-cluster2 |
| PCNX4    | 3.66E-05 | 0.341843 | 0.43  | 0.322 | 0.684836 | H-cluster2 |
| SLC12A6  | 4.04E-05 | 0.361431 | 0.286 | 0.189 | 0.756122 | H-cluster2 |
| DLGAP2   | 4.05E-05 | 0.309214 | 0.257 | 0.161 | 0.757298 | H-cluster2 |
| ADCY9    | 4.07E-05 | 0.315924 | 0.39  | 0.284 | 0.760548 | H-cluster2 |

|          |          |          |       |       |          |            |
|----------|----------|----------|-------|-------|----------|------------|
| MYO6     | 4.15E-05 | 0.28692  | 0.347 | 0.246 | 0.776763 | H-cluster2 |
| NKTR     | 4.25E-05 | 0.261133 | 0.602 | 0.511 | 0.79584  | H-cluster2 |
| CPEB2    | 4.48E-05 | 0.284087 | 0.286 | 0.19  | 0.837438 | H-cluster2 |
| AOX1     | 4.52E-05 | 0.332937 | 0.464 | 0.356 | 0.845112 | H-cluster2 |
| PSME4    | 4.72E-05 | 0.280117 | 0.462 | 0.354 | 0.882418 | H-cluster2 |
| C2CD2    | 4.85E-05 | 0.302278 | 0.321 | 0.22  | 0.907153 | H-cluster2 |
| SCRN1    | 4.87E-05 | 0.338449 | 0.286 | 0.19  | 0.910741 | H-cluster2 |
| PALLD    | 5.17E-05 | 0.283381 | 0.491 | 0.388 | 0.966762 | H-cluster2 |
| MAST2    | 5.21E-05 | 0.283855 | 0.345 | 0.242 | 0.97534  | H-cluster2 |
| ERBIN    | 5.55E-05 | 0.318788 | 0.589 | 0.496 | 1        | H-cluster2 |
| STIM1    | 5.88E-05 | 0.334479 | 0.48  | 0.397 | 1        | H-cluster2 |
| DOCK7    | 6.82E-05 | 0.294507 | 0.446 | 0.332 | 1        | H-cluster2 |
| SMG6     | 7.20E-05 | 0.271099 | 0.642 | 0.577 | 1        | H-cluster2 |
| GABRE    | 7.45E-05 | 0.264558 | 0.294 | 0.2   | 1        | H-cluster2 |
| KLHL29   | 7.90E-05 | 0.390194 | 0.382 | 0.283 | 1        | H-cluster2 |
| ZBTB1    | 8.16E-05 | 0.269015 | 0.387 | 0.284 | 1        | H-cluster2 |
| EXOC1    | 8.18E-05 | 0.268506 | 0.422 | 0.319 | 1        | H-cluster2 |
| FLNB     | 9.06E-05 | 0.291693 | 0.326 | 0.229 | 1        | H-cluster2 |
| FMNL2    | 9.16E-05 | 0.313426 | 0.573 | 0.49  | 1        | H-cluster2 |
| MBP      | 1.00E-04 | 0.352228 | 0.385 | 0.285 | 1        | H-cluster2 |
| ADAM33   | 0.000101 | 0.265619 | 0.363 | 0.266 | 1        | H-cluster2 |
| RABGEF1  | 0.000102 | 0.300045 | 0.332 | 0.236 | 1        | H-cluster2 |
| ATAD2B   | 0.000106 | 0.307071 | 0.517 | 0.427 | 1        | H-cluster2 |
| VTI1A    | 0.00013  | 0.271662 | 0.615 | 0.54  | 1        | H-cluster2 |
| CDK8     | 0.000147 | 0.285412 | 0.284 | 0.19  | 1        | H-cluster2 |
| SDC2     | 0.000151 | 0.346453 | 0.581 | 0.511 | 1        | H-cluster2 |
| PRSS23   | 0.000152 | 0.283946 | 0.406 | 0.304 | 1        | H-cluster2 |
| CUEDC1   | 0.000152 | 0.299807 | 0.324 | 0.228 | 1        | H-cluster2 |
| CEP85L   | 0.000165 | 0.292493 | 0.414 | 0.309 | 1        | H-cluster2 |
| KREMEN1  | 0.00019  | 0.316614 | 0.374 | 0.283 | 1        | H-cluster2 |
| HIVEP1   | 0.000229 | 0.27815  | 0.427 | 0.341 | 1        | H-cluster2 |
| TBCK     | 0.000275 | 0.250089 | 0.525 | 0.433 | 1        | H-cluster2 |
| IL6ST    | 0.000294 | 0.268422 | 0.592 | 0.528 | 1        | H-cluster2 |
| C11orf49 | 0.000321 | 0.324784 | 0.366 | 0.281 | 1        | H-cluster2 |
| ASXL2    | 0.000323 | 0.297847 | 0.294 | 0.206 | 1        | H-cluster2 |
| DLG1     | 0.000366 | 0.251121 | 0.509 | 0.425 | 1        | H-cluster2 |
| IL17RD   | 0.000367 | 0.296246 | 0.252 | 0.173 | 1        | H-cluster2 |
| RIMKLB   | 0.000368 | 0.267793 | 0.334 | 0.242 | 1        | H-cluster2 |
| GALNT15  | 0.000369 | 0.349196 | 0.289 | 0.204 | 1        | H-cluster2 |
| KIAA0825 | 0.000378 | 0.272969 | 0.342 | 0.248 | 1        | H-cluster2 |
| DYNC2L1  | 0.000395 | 0.256098 | 0.286 | 0.197 | 1        | H-cluster2 |
| TAF1B    | 0.000441 | 0.254184 | 0.279 | 0.19  | 1        | H-cluster2 |
| SIPA1L1  | 0.000487 | 0.25621  | 0.263 | 0.179 | 1        | H-cluster2 |
| CCDC146  | 0.000489 | 0.279037 | 0.408 | 0.316 | 1        | H-cluster2 |
| CD44     | 0.000527 | 0.266821 | 0.568 | 0.494 | 1        | H-cluster2 |
| ESCO1    | 0.000538 | 0.255814 | 0.302 | 0.215 | 1        | H-cluster2 |
| GPC6     | 0.000587 | 0.561171 | 0.408 | 0.328 | 1        | H-cluster2 |

|         |          |          |       |       |          |            |
|---------|----------|----------|-------|-------|----------|------------|
| CALU    | 0.000591 | 0.25158  | 0.342 | 0.253 | 1        | H-cluster2 |
| PRIM2   | 0.000732 | 0.380569 | 0.366 | 0.291 | 1        | H-cluster2 |
| FOXO1   | 0.000835 | 0.252314 | 0.692 | 0.62  | 1        | H-cluster2 |
| SETD7   | 0.000975 | 0.262052 | 0.464 | 0.376 | 1        | H-cluster2 |
| HEATR5B | 0.001041 | 0.292275 | 0.363 | 0.279 | 1        | H-cluster2 |
| CYP4X1  | 0.001052 | 0.254583 | 0.35  | 0.27  | 1        | H-cluster2 |
| TTC37   | 0.001159 | 0.28513  | 0.411 | 0.333 | 1        | H-cluster2 |
| WASF1   | 0.001529 | 0.327162 | 0.318 | 0.245 | 1        | H-cluster2 |
| FAM126A | 0.002117 | 0.294591 | 0.443 | 0.37  | 1        | H-cluster2 |
| BACH1   | 0.002148 | 0.289725 | 0.347 | 0.275 | 1        | H-cluster2 |
| SPIRE1  | 0.00267  | 0.250152 | 0.286 | 0.212 | 1        | H-cluster2 |
| PLPP1   | 0.002914 | 0.263963 | 0.517 | 0.443 | 1        | H-cluster2 |
| FAT4    | 0.003074 | 0.3059   | 0.496 | 0.428 | 1        | H-cluster2 |
| UBTD2   | 0.003286 | 0.282297 | 0.321 | 0.253 | 1        | H-cluster2 |
| KIFAP3  | 0.003459 | 0.255943 | 0.435 | 0.365 | 1        | H-cluster2 |
| PDE8A   | 0.004113 | 0.267581 | 0.52  | 0.47  | 1        | H-cluster2 |
| TPRG1   | 0.004253 | 0.264266 | 0.308 | 0.239 | 1        | H-cluster2 |
| AZIN1   | 0.005677 | 0.260838 | 0.286 | 0.226 | 1        | H-cluster2 |
| RNF13   | 0.005969 | 0.258253 | 0.43  | 0.362 | 1        | H-cluster2 |
| ODF2L   | 0.007536 | 0.265026 | 0.395 | 0.332 | 1        | H-cluster2 |
| LGALS1  | 3.43E-60 | 1.163273 | 0.481 | 0.085 | 6.41E-56 | H-cluster3 |
| CRIP1   | 5.23E-60 | 0.723349 | 0.314 | 0.018 | 9.79E-56 | H-cluster3 |
| MYADM   | 1.40E-57 | 1.181368 | 0.617 | 0.172 | 2.61E-53 | H-cluster3 |
| CST3    | 1.85E-57 | 1.824169 | 0.617 | 0.207 | 3.46E-53 | H-cluster3 |
| NR4A1   | 1.55E-56 | 1.557051 | 0.53  | 0.119 | 2.90E-52 | H-cluster3 |
| TIMP1   | 1.46E-55 | 1.019361 | 0.47  | 0.084 | 2.74E-51 | H-cluster3 |
| JUND    | 4.24E-55 | 1.184688 | 0.686 | 0.227 | 7.93E-51 | H-cluster3 |
| IGFBP6  | 1.38E-53 | 1.787527 | 0.659 | 0.262 | 2.59E-49 | H-cluster3 |
| UBB     | 1.33E-52 | 0.815894 | 0.402 | 0.06  | 2.48E-48 | H-cluster3 |
| S100A10 | 3.96E-52 | 1.563194 | 0.564 | 0.171 | 7.41E-48 | H-cluster3 |
| ACTG1   | 2.49E-51 | 1.202391 | 0.591 | 0.179 | 4.65E-47 | H-cluster3 |
| S100A6  | 2.64E-51 | 1.826697 | 0.568 | 0.181 | 4.94E-47 | H-cluster3 |
| S100A11 | 1.90E-50 | 1.068632 | 0.466 | 0.097 | 3.56E-46 | H-cluster3 |
| UBC     | 7.28E-49 | 1.184596 | 0.545 | 0.158 | 1.36E-44 | H-cluster3 |
| MFAP4   | 1.63E-48 | 1.382443 | 0.58  | 0.185 | 3.05E-44 | H-cluster3 |
| EIF1    | 1.73E-48 | 1.081175 | 0.572 | 0.17  | 3.23E-44 | H-cluster3 |
| CD63    | 2.43E-48 | 1.237705 | 0.496 | 0.13  | 4.55E-44 | H-cluster3 |
| CD248   | 2.45E-48 | 1.087868 | 0.5   | 0.12  | 4.58E-44 | H-cluster3 |
| TUBA1B  | 1.15E-46 | 0.727858 | 0.405 | 0.073 | 2.15E-42 | H-cluster3 |
| LTBP4   | 1.34E-46 | 1.296618 | 0.693 | 0.323 | 2.50E-42 | H-cluster3 |
| ACTB    | 7.06E-46 | 1.339177 | 0.678 | 0.314 | 1.32E-41 | H-cluster3 |
| MFAP51  | 9.50E-46 | 1.193826 | 0.765 | 0.375 | 1.78E-41 | H-cluster3 |
| H3F3B   | 1.19E-45 | 1.081168 | 0.561 | 0.172 | 2.22E-41 | H-cluster3 |
| CD551   | 1.60E-45 | 1.172085 | 0.746 | 0.312 | 2.99E-41 | H-cluster3 |
| FSTL1   | 2.58E-45 | 1.250014 | 0.826 | 0.568 | 4.82E-41 | H-cluster3 |
| HSPA1A  | 4.41E-45 | 0.490516 | 0.322 | 0.038 | 8.25E-41 | H-cluster3 |
| TPT1    | 9.12E-45 | 1.233508 | 0.652 | 0.269 | 1.71E-40 | H-cluster3 |

|          |          |          |       |       |          |            |
|----------|----------|----------|-------|-------|----------|------------|
| CLU      | 1.42E-44 | 0.968393 | 0.405 | 0.075 | 2.65E-40 | H-cluster3 |
| CD81     | 2.02E-44 | 0.994327 | 0.511 | 0.14  | 3.77E-40 | H-cluster3 |
| NR4A3    | 1.03E-43 | 1.432439 | 0.261 | 0.021 | 1.93E-39 | H-cluster3 |
| RPS27    | 1.18E-43 | 0.822507 | 0.473 | 0.112 | 2.20E-39 | H-cluster3 |
| KLF2     | 4.94E-43 | 0.988503 | 0.489 | 0.13  | 9.24E-39 | H-cluster3 |
| IFITM3   | 5.02E-43 | 0.597664 | 0.352 | 0.054 | 9.39E-39 | H-cluster3 |
| LMNA     | 7.77E-43 | 1.178563 | 0.636 | 0.237 | 1.45E-38 | H-cluster3 |
| PTMA     | 1.44E-41 | 0.873864 | 0.496 | 0.134 | 2.70E-37 | H-cluster3 |
| TMSB4X   | 2.91E-41 | 1.293004 | 0.678 | 0.322 | 5.43E-37 | H-cluster3 |
| GPRC5A   | 3.00E-41 | 1.371618 | 0.398 | 0.081 | 5.61E-37 | H-cluster3 |
| ISLR     | 7.67E-41 | 0.866391 | 0.462 | 0.118 | 1.43E-36 | H-cluster3 |
| RPL36AL  | 1.20E-40 | 0.528734 | 0.314 | 0.044 | 2.25E-36 | H-cluster3 |
| ITM2A    | 1.48E-40 | 0.667953 | 0.39  | 0.075 | 2.77E-36 | H-cluster3 |
| CFD      | 3.54E-40 | 2.029331 | 0.723 | 0.479 | 6.62E-36 | H-cluster3 |
| JUN      | 4.17E-40 | 1.22077  | 0.515 | 0.153 | 7.81E-36 | H-cluster3 |
| HSPB1    | 5.11E-40 | 0.632891 | 0.337 | 0.053 | 9.56E-36 | H-cluster3 |
| EMP3     | 6.57E-40 | 0.812187 | 0.443 | 0.107 | 1.23E-35 | H-cluster3 |
| TMSB10   | 1.10E-39 | 1.088477 | 0.564 | 0.199 | 2.06E-35 | H-cluster3 |
| HSPA8    | 1.34E-39 | 0.56101  | 0.345 | 0.057 | 2.50E-35 | H-cluster3 |
| LGALS3BP | 3.00E-39 | 0.752214 | 0.383 | 0.077 | 5.61E-35 | H-cluster3 |
| GAPDH    | 3.15E-39 | 0.658408 | 0.341 | 0.058 | 5.90E-35 | H-cluster3 |
| RPL18    | 6.34E-39 | 0.752468 | 0.451 | 0.11  | 1.19E-34 | H-cluster3 |
| RPL15    | 6.67E-39 | 0.867849 | 0.436 | 0.107 | 1.25E-34 | H-cluster3 |
| FTH1     | 1.52E-38 | 1.100228 | 0.481 | 0.144 | 2.85E-34 | H-cluster3 |
| VAT1     | 1.75E-38 | 0.495348 | 0.292 | 0.039 | 3.27E-34 | H-cluster3 |
| TUBA1A   | 1.89E-38 | 0.81815  | 0.481 | 0.133 | 3.53E-34 | H-cluster3 |
| GAS1     | 2.60E-38 | 0.885556 | 0.443 | 0.113 | 4.85E-34 | H-cluster3 |
| EEF1A1   | 4.19E-38 | 1.181902 | 0.621 | 0.273 | 7.85E-34 | H-cluster3 |
| B2M      | 4.99E-38 | 1.003456 | 0.716 | 0.388 | 9.34E-34 | H-cluster3 |
| CPE      | 8.08E-38 | 0.982175 | 0.602 | 0.233 | 1.51E-33 | H-cluster3 |
| OOEP     | 1.13E-37 | 0.820734 | 0.485 | 0.135 | 2.10E-33 | H-cluster3 |
| EEF2     | 1.36E-37 | 0.633853 | 0.402 | 0.089 | 2.55E-33 | H-cluster3 |
| CLIC1    | 1.82E-37 | 0.470371 | 0.295 | 0.041 | 3.40E-33 | H-cluster3 |
| RPS11    | 2.21E-37 | 0.891449 | 0.477 | 0.137 | 4.14E-33 | H-cluster3 |
| C17orf58 | 3.92E-37 | 0.847536 | 0.436 | 0.112 | 7.33E-33 | H-cluster3 |
| RPL8     | 4.39E-37 | 0.696219 | 0.451 | 0.118 | 8.21E-33 | H-cluster3 |
| CREB51   | 4.50E-37 | 0.856597 | 0.837 | 0.416 | 8.41E-33 | H-cluster3 |
| STEAP1B  | 7.44E-37 | 0.579946 | 0.402 | 0.089 | 1.39E-32 | H-cluster3 |
| ATP5E    | 9.53E-37 | 0.647684 | 0.333 | 0.06  | 1.78E-32 | H-cluster3 |
| LUM      | 1.07E-36 | 1.177953 | 0.53  | 0.185 | 1.99E-32 | H-cluster3 |
| TAGLN2   | 1.25E-36 | 0.721367 | 0.428 | 0.112 | 2.33E-32 | H-cluster3 |
| ALDOA    | 1.37E-36 | 0.438486 | 0.345 | 0.062 | 2.57E-32 | H-cluster3 |
| RPLP1    | 2.11E-36 | 0.994371 | 0.561 | 0.207 | 3.95E-32 | H-cluster3 |
| LDHA     | 3.64E-36 | 0.719672 | 0.405 | 0.093 | 6.80E-32 | H-cluster3 |
| RHOB     | 4.13E-36 | 0.641277 | 0.318 | 0.054 | 7.73E-32 | H-cluster3 |
| METRNL   | 4.50E-36 | 0.472958 | 0.322 | 0.055 | 8.41E-32 | H-cluster3 |
| RPS8     | 4.57E-36 | 0.821828 | 0.477 | 0.139 | 8.54E-32 | H-cluster3 |



|          |          |          |       |       |          |            |
|----------|----------|----------|-------|-------|----------|------------|
| RPS4X    | 5.00E-36 | 0.745636 | 0.447 | 0.121 | 9.35E-32 | H-cluster3 |
| RPL23    | 9.28E-36 | 0.546001 | 0.371 | 0.077 | 1.74E-31 | H-cluster3 |
| KLF4     | 2.17E-35 | 0.990731 | 0.47  | 0.14  | 4.06E-31 | H-cluster3 |
| RPS14    | 2.23E-35 | 0.875946 | 0.481 | 0.149 | 4.18E-31 | H-cluster3 |
| RPL24    | 5.90E-35 | 0.609702 | 0.367 | 0.078 | 1.10E-30 | H-cluster3 |
| TUBB     | 6.88E-35 | 0.543024 | 0.364 | 0.077 | 1.29E-30 | H-cluster3 |
| RPL29    | 7.70E-35 | 0.755461 | 0.443 | 0.122 | 1.44E-30 | H-cluster3 |
| TPPP3    | 8.42E-35 | 0.605107 | 0.311 | 0.055 | 1.57E-30 | H-cluster3 |
| RPL38    | 8.43E-35 | 0.656109 | 0.371 | 0.082 | 1.58E-30 | H-cluster3 |
| PRDX1    | 8.54E-35 | 0.51615  | 0.333 | 0.063 | 1.60E-30 | H-cluster3 |
| IER2     | 8.88E-35 | 0.864549 | 0.409 | 0.103 | 1.66E-30 | H-cluster3 |
| RPL19    | 9.72E-35 | 0.892865 | 0.455 | 0.134 | 1.82E-30 | H-cluster3 |
| RPS15    | 1.12E-34 | 0.859279 | 0.458 | 0.135 | 2.09E-30 | H-cluster3 |
| CALR     | 2.21E-34 | 0.478023 | 0.326 | 0.061 | 4.14E-30 | H-cluster3 |
| RPL36    | 2.42E-34 | 0.685878 | 0.447 | 0.121 | 4.53E-30 | H-cluster3 |
| POLR2L   | 2.51E-34 | 0.482578 | 0.292 | 0.047 | 4.70E-30 | H-cluster3 |
| SRP14    | 2.57E-34 | 0.512815 | 0.322 | 0.06  | 4.81E-30 | H-cluster3 |
| NFKBIZ   | 2.77E-34 | 0.918116 | 0.496 | 0.159 | 5.17E-30 | H-cluster3 |
| FAU      | 3.28E-34 | 0.71909  | 0.394 | 0.095 | 6.14E-30 | H-cluster3 |
| MYL12B   | 4.24E-34 | 0.650699 | 0.402 | 0.101 | 7.94E-30 | H-cluster3 |
| TMBIM6   | 7.48E-34 | 0.722434 | 0.527 | 0.184 | 1.40E-29 | H-cluster3 |
| S100A4   | 8.86E-34 | 1.262609 | 0.527 | 0.214 | 1.66E-29 | H-cluster3 |
| MARCKS   | 9.79E-34 | 1.076423 | 0.451 | 0.14  | 1.83E-29 | H-cluster3 |
| TIMP2    | 1.01E-33 | 1.059095 | 0.652 | 0.345 | 1.89E-29 | H-cluster3 |
| DUSP1    | 1.02E-33 | 0.881428 | 0.405 | 0.106 | 1.90E-29 | H-cluster3 |
| HSPA5    | 1.11E-33 | 0.440639 | 0.307 | 0.053 | 2.08E-29 | H-cluster3 |
| SOD3     | 1.79E-33 | 0.498685 | 0.261 | 0.036 | 3.36E-29 | H-cluster3 |
| RPL7A    | 1.89E-33 | 0.724851 | 0.386 | 0.097 | 3.53E-29 | H-cluster3 |
| PLAC9    | 2.11E-33 | 1.001577 | 0.583 | 0.256 | 3.95E-29 | H-cluster3 |
| RPL13A   | 2.50E-33 | 0.815669 | 0.504 | 0.172 | 4.68E-29 | H-cluster3 |
| RPL41    | 2.56E-33 | 0.968744 | 0.542 | 0.207 | 4.79E-29 | H-cluster3 |
| CYR61    | 2.62E-33 | 1.067837 | 0.364 | 0.085 | 4.90E-29 | H-cluster3 |
| BAIAP2L1 | 3.24E-33 | 0.72867  | 0.417 | 0.111 | 6.05E-29 | H-cluster3 |
| FTL      | 3.74E-33 | 0.917839 | 0.417 | 0.114 | 6.99E-29 | H-cluster3 |
| RPS27A   | 3.95E-33 | 0.849801 | 0.496 | 0.163 | 7.40E-29 | H-cluster3 |
| TOMM7    | 5.45E-33 | 0.467378 | 0.326 | 0.063 | 1.02E-28 | H-cluster3 |
| RPL28    | 6.02E-33 | 0.779407 | 0.504 | 0.168 | 1.13E-28 | H-cluster3 |
| PPDPF    | 7.05E-33 | 0.416625 | 0.269 | 0.039 | 1.32E-28 | H-cluster3 |
| RPS13    | 1.00E-32 | 0.714876 | 0.383 | 0.094 | 1.87E-28 | H-cluster3 |
| UBA52    | 1.18E-32 | 0.633634 | 0.413 | 0.108 | 2.20E-28 | H-cluster3 |
| JUNB     | 1.21E-32 | 1.117212 | 0.47  | 0.149 | 2.25E-28 | H-cluster3 |
| CDV3     | 1.73E-32 | 0.623902 | 0.39  | 0.096 | 3.23E-28 | H-cluster3 |
| UAP1     | 2.28E-32 | 1.07934  | 0.636 | 0.282 | 4.26E-28 | H-cluster3 |
| OGN      | 3.17E-32 | 0.775008 | 0.33  | 0.071 | 5.92E-28 | H-cluster3 |
| TNXB1    | 3.87E-32 | 0.87664  | 0.841 | 0.687 | 7.24E-28 | H-cluster3 |
| RPL3     | 4.40E-32 | 0.748476 | 0.405 | 0.108 | 8.22E-28 | H-cluster3 |
| GFPT21   | 4.88E-32 | 1.099144 | 0.739 | 0.394 | 9.13E-28 | H-cluster3 |

|          |          |          |       |       |          |            |
|----------|----------|----------|-------|-------|----------|------------|
| MMP2     | 5.23E-32 | 1.026101 | 0.553 | 0.231 | 9.78E-28 | H-cluster3 |
| PSAP     | 8.33E-32 | 0.908196 | 0.545 | 0.222 | 1.56E-27 | H-cluster3 |
| PPIC     | 8.41E-32 | 0.397708 | 0.299 | 0.054 | 1.57E-27 | H-cluster3 |
| SPARC    | 1.10E-31 | 1.097833 | 0.587 | 0.272 | 2.05E-27 | H-cluster3 |
| CFL1     | 2.40E-31 | 0.485206 | 0.333 | 0.071 | 4.49E-27 | H-cluster3 |
| RPS5     | 6.62E-31 | 0.546153 | 0.33  | 0.07  | 1.24E-26 | H-cluster3 |
| PPIA     | 8.22E-31 | 0.645456 | 0.473 | 0.156 | 1.54E-26 | H-cluster3 |
| RABAC1   | 9.33E-31 | 0.384868 | 0.269 | 0.044 | 1.75E-26 | H-cluster3 |
| LRRN4CL  | 9.43E-31 | 0.401775 | 0.265 | 0.042 | 1.76E-26 | H-cluster3 |
| VIM      | 1.53E-30 | 1.227181 | 0.659 | 0.379 | 2.86E-26 | H-cluster3 |
| RPL27A   | 1.63E-30 | 0.720237 | 0.432 | 0.131 | 3.05E-26 | H-cluster3 |
| FOSL2    | 2.17E-30 | 0.699579 | 0.345 | 0.081 | 4.06E-26 | H-cluster3 |
| OST4     | 2.19E-30 | 0.365731 | 0.254 | 0.038 | 4.10E-26 | H-cluster3 |
| CEBPD    | 2.56E-30 | 0.891619 | 0.356 | 0.088 | 4.80E-26 | H-cluster3 |
| RPS20    | 2.60E-30 | 0.555148 | 0.386 | 0.1   | 4.87E-26 | H-cluster3 |
| RPL10    | 3.34E-30 | 0.990698 | 0.58  | 0.269 | 6.26E-26 | H-cluster3 |
| RPS24    | 3.88E-30 | 0.698637 | 0.458 | 0.151 | 7.26E-26 | H-cluster3 |
| SH3BGRL3 | 5.40E-30 | 0.399476 | 0.28  | 0.049 | 1.01E-25 | H-cluster3 |
| RPLP2    | 5.73E-30 | 0.698025 | 0.466 | 0.154 | 1.07E-25 | H-cluster3 |
| XBP1     | 7.74E-30 | 0.509282 | 0.314 | 0.065 | 1.45E-25 | H-cluster3 |
| VSIR     | 9.00E-30 | 0.519679 | 0.36  | 0.088 | 1.68E-25 | H-cluster3 |
| IGFBP5   | 1.01E-29 | 1.323992 | 0.705 | 0.471 | 1.89E-25 | H-cluster3 |
| PGRMC1   | 1.09E-29 | 0.369441 | 0.269 | 0.046 | 2.03E-25 | H-cluster3 |
| RPS12    | 1.50E-29 | 0.811938 | 0.477 | 0.169 | 2.81E-25 | H-cluster3 |
| ZFP36    | 1.61E-29 | 1.181711 | 0.443 | 0.144 | 3.01E-25 | H-cluster3 |
| RPL10A   | 1.61E-29 | 0.597125 | 0.398 | 0.113 | 3.02E-25 | H-cluster3 |
| FHOD31   | 1.66E-29 | 0.764138 | 0.614 | 0.254 | 3.11E-25 | H-cluster3 |
| RPS7     | 1.66E-29 | 0.552702 | 0.428 | 0.124 | 3.11E-25 | H-cluster3 |
| RPL11    | 2.20E-29 | 0.89472  | 0.462 | 0.158 | 4.12E-25 | H-cluster3 |
| RPL13    | 2.44E-29 | 0.945036 | 0.606 | 0.297 | 4.56E-25 | H-cluster3 |
| CHCHD2   | 2.61E-29 | 0.462024 | 0.33  | 0.075 | 4.87E-25 | H-cluster3 |
| RPS9     | 2.83E-29 | 0.717305 | 0.47  | 0.159 | 5.29E-25 | H-cluster3 |
| PPIB     | 3.62E-29 | 0.479363 | 0.307 | 0.065 | 6.77E-25 | H-cluster3 |
| TIMP3    | 3.97E-29 | 1.017057 | 0.754 | 0.54  | 7.42E-25 | H-cluster3 |
| RPL23A   | 4.49E-29 | 0.746346 | 0.432 | 0.14  | 8.40E-25 | H-cluster3 |
| GNAS     | 6.41E-29 | 0.687628 | 0.633 | 0.304 | 1.20E-24 | H-cluster3 |
| RPS3A    | 6.44E-29 | 0.506573 | 0.345 | 0.083 | 1.20E-24 | H-cluster3 |
| ANXA5    | 6.61E-29 | 0.721046 | 0.511 | 0.188 | 1.24E-24 | H-cluster3 |
| RPS2     | 9.77E-29 | 0.753267 | 0.447 | 0.144 | 1.83E-24 | H-cluster3 |
| TUBB4B   | 9.83E-29 | 0.522363 | 0.28  | 0.055 | 1.84E-24 | H-cluster3 |
| SERPING1 | 1.10E-28 | 0.97379  | 0.576 | 0.291 | 2.06E-24 | H-cluster3 |
| APOO     | 1.16E-28 | 0.800067 | 0.504 | 0.191 | 2.17E-24 | H-cluster3 |
| TUBB6    | 1.62E-28 | 0.709624 | 0.564 | 0.231 | 3.03E-24 | H-cluster3 |
| TMEM109  | 1.96E-28 | 0.368813 | 0.265 | 0.048 | 3.67E-24 | H-cluster3 |
| CDKN1C   | 4.25E-28 | 0.472489 | 0.318 | 0.073 | 7.96E-24 | H-cluster3 |
| RPS19    | 4.80E-28 | 0.676534 | 0.485 | 0.169 | 8.97E-24 | H-cluster3 |
| RPL32    | 4.86E-28 | 0.739617 | 0.496 | 0.182 | 9.08E-24 | H-cluster3 |

|          |          |          |       |       |          |            |
|----------|----------|----------|-------|-------|----------|------------|
| COX7C    | 5.23E-28 | 0.404111 | 0.265 | 0.048 | 9.78E-24 | H-cluster3 |
| HLA-A    | 5.60E-28 | 0.621204 | 0.511 | 0.189 | 1.05E-23 | H-cluster3 |
| MT2A     | 5.98E-28 | 0.603639 | 0.314 | 0.071 | 1.12E-23 | H-cluster3 |
| RPL34    | 6.09E-28 | 0.776413 | 0.466 | 0.169 | 1.14E-23 | H-cluster3 |
| GRN      | 7.74E-28 | 0.363632 | 0.307 | 0.065 | 1.45E-23 | H-cluster3 |
| RPS25    | 1.12E-27 | 0.659373 | 0.439 | 0.146 | 2.10E-23 | H-cluster3 |
| RPS18    | 1.21E-27 | 0.787983 | 0.481 | 0.18  | 2.26E-23 | H-cluster3 |
| RPL7     | 1.28E-27 | 0.567233 | 0.428 | 0.133 | 2.40E-23 | H-cluster3 |
| DBN11    | 1.29E-27 | 0.581089 | 0.402 | 0.12  | 2.40E-23 | H-cluster3 |
| MYL6     | 1.40E-27 | 0.674426 | 0.523 | 0.213 | 2.61E-23 | H-cluster3 |
| PRELP    | 2.54E-27 | 0.654747 | 0.398 | 0.119 | 4.75E-23 | H-cluster3 |
| GALNT101 | 3.27E-27 | 0.692333 | 0.545 | 0.22  | 6.11E-23 | H-cluster3 |
| SERF2    | 3.30E-27 | 0.739994 | 0.428 | 0.148 | 6.17E-23 | H-cluster3 |
| CTGF     | 4.07E-27 | 0.703769 | 0.311 | 0.072 | 7.61E-23 | H-cluster3 |
| SKIL     | 4.46E-27 | 0.782216 | 0.549 | 0.236 | 8.35E-23 | H-cluster3 |
| EID1     | 5.25E-27 | 0.624929 | 0.341 | 0.091 | 9.81E-23 | H-cluster3 |
| ANXA2    | 7.03E-27 | 0.776319 | 0.708 | 0.43  | 1.31E-22 | H-cluster3 |
| ADAL     | 7.41E-27 | 1.159438 | 0.322 | 0.082 | 1.39E-22 | H-cluster3 |
| MIDN     | 1.39E-26 | 0.539272 | 0.326 | 0.081 | 2.59E-22 | H-cluster3 |
| DNAJA1   | 1.48E-26 | 0.552975 | 0.333 | 0.084 | 2.77E-22 | H-cluster3 |
| COX4I1   | 1.53E-26 | 0.438284 | 0.265 | 0.051 | 2.86E-22 | H-cluster3 |
| RPS23    | 4.25E-26 | 0.72223  | 0.447 | 0.162 | 7.95E-22 | H-cluster3 |
| MGP      | 4.70E-26 | 1.277755 | 0.523 | 0.237 | 8.79E-22 | H-cluster3 |
| MELTF    | 4.71E-26 | 0.390094 | 0.254 | 0.048 | 8.81E-22 | H-cluster3 |
| RPL27    | 5.20E-26 | 0.471846 | 0.333 | 0.086 | 9.72E-22 | H-cluster3 |
| ACKR3    | 5.71E-26 | 0.893295 | 0.617 | 0.338 | 1.07E-21 | H-cluster3 |
| CAVIN1   | 7.74E-26 | 0.613739 | 0.477 | 0.178 | 1.45E-21 | H-cluster3 |
| GSTP1    | 8.06E-26 | 0.379927 | 0.273 | 0.056 | 1.51E-21 | H-cluster3 |
| RPSA     | 8.18E-26 | 0.499444 | 0.386 | 0.113 | 1.53E-21 | H-cluster3 |
| SFRP2    | 8.89E-26 | 0.908464 | 0.254 | 0.05  | 1.66E-21 | H-cluster3 |
| APLP2    | 9.98E-26 | 0.538256 | 0.466 | 0.164 | 1.87E-21 | H-cluster3 |
| IGF2     | 1.66E-25 | 0.7163   | 0.261 | 0.053 | 3.10E-21 | H-cluster3 |
| SELENOM  | 1.82E-25 | 0.411662 | 0.326 | 0.082 | 3.40E-21 | H-cluster3 |
| LAMB2    | 2.10E-25 | 0.574347 | 0.458 | 0.171 | 3.93E-21 | H-cluster3 |
| F10      | 2.18E-25 | 0.570288 | 0.341 | 0.097 | 4.08E-21 | H-cluster3 |
| RPL4     | 2.22E-25 | 0.510417 | 0.345 | 0.095 | 4.16E-21 | H-cluster3 |
| FLNA     | 2.30E-25 | 0.551417 | 0.39  | 0.12  | 4.31E-21 | H-cluster3 |
| OLFML2A  | 2.34E-25 | 0.678311 | 0.33  | 0.089 | 4.38E-21 | H-cluster3 |
| RPL35A   | 2.35E-25 | 0.61501  | 0.394 | 0.127 | 4.40E-21 | H-cluster3 |
| B4GALT1  | 2.56E-25 | 0.799567 | 0.545 | 0.226 | 4.78E-21 | H-cluster3 |
| PI161    | 2.62E-25 | 0.91774  | 0.523 | 0.214 | 4.90E-21 | H-cluster3 |
| PLAT     | 2.67E-25 | 0.718794 | 0.33  | 0.086 | 4.99E-21 | H-cluster3 |
| ECM1     | 3.30E-25 | 0.397154 | 0.292 | 0.068 | 6.17E-21 | H-cluster3 |
| ADI1     | 3.39E-25 | 0.38603  | 0.303 | 0.073 | 6.34E-21 | H-cluster3 |
| GNB2     | 4.09E-25 | 0.338664 | 0.307 | 0.073 | 7.66E-21 | H-cluster3 |
| OLFML3   | 5.52E-25 | 0.411718 | 0.295 | 0.069 | 1.03E-20 | H-cluster3 |
| ITM2B    | 6.71E-25 | 0.819377 | 0.621 | 0.365 | 1.25E-20 | H-cluster3 |

|          |          |          |       |       |          |            |
|----------|----------|----------|-------|-------|----------|------------|
| RPS3     | 6.88E-25 | 0.603284 | 0.455 | 0.166 | 1.29E-20 | H-cluster3 |
| UGDH     | 7.22E-25 | 1.149986 | 0.428 | 0.148 | 1.35E-20 | H-cluster3 |
| ARL6IP5  | 8.05E-25 | 0.463421 | 0.367 | 0.109 | 1.51E-20 | H-cluster3 |
| PDIA3    | 1.09E-24 | 0.546087 | 0.424 | 0.144 | 2.04E-20 | H-cluster3 |
| C1R      | 1.14E-24 | 0.924208 | 0.534 | 0.264 | 2.13E-20 | H-cluster3 |
| RACK1    | 1.44E-24 | 0.522064 | 0.386 | 0.122 | 2.69E-20 | H-cluster3 |
| ATP1B3   | 1.48E-24 | 0.709502 | 0.341 | 0.096 | 2.77E-20 | H-cluster3 |
| LAPTM4A  | 1.63E-24 | 0.761607 | 0.527 | 0.247 | 3.05E-20 | H-cluster3 |
| CLIC4    | 2.07E-24 | 0.917615 | 0.527 | 0.219 | 3.87E-20 | H-cluster3 |
| FOS      | 2.25E-24 | 1.063019 | 0.545 | 0.255 | 4.21E-20 | H-cluster3 |
| FBN11    | 2.36E-24 | 0.597146 | 0.947 | 0.793 | 4.42E-20 | H-cluster3 |
| HSPB8    | 2.60E-24 | 0.538492 | 0.277 | 0.061 | 4.86E-20 | H-cluster3 |
| RPS17    | 2.72E-24 | 0.427336 | 0.284 | 0.064 | 5.09E-20 | H-cluster3 |
| RPL5     | 3.25E-24 | 0.584631 | 0.409 | 0.135 | 6.07E-20 | H-cluster3 |
| HSP90AB1 | 3.40E-24 | 0.44527  | 0.379 | 0.116 | 6.37E-20 | H-cluster3 |
| RPL14    | 3.54E-24 | 0.583249 | 0.39  | 0.126 | 6.62E-20 | H-cluster3 |
| PTMS     | 4.19E-24 | 0.43695  | 0.333 | 0.092 | 7.83E-20 | H-cluster3 |
| RPS16    | 5.23E-24 | 0.553244 | 0.371 | 0.114 | 9.78E-20 | H-cluster3 |
| H3F3A    | 9.34E-24 | 0.552299 | 0.436 | 0.162 | 1.75E-19 | H-cluster3 |
| RPS26    | 1.03E-23 | 0.335819 | 0.261 | 0.056 | 1.92E-19 | H-cluster3 |
| MXRA7    | 1.30E-23 | 0.445632 | 0.417 | 0.139 | 2.43E-19 | H-cluster3 |
| RNH1     | 1.34E-23 | 0.310627 | 0.318 | 0.084 | 2.51E-19 | H-cluster3 |
| HLA-C    | 1.34E-23 | 0.551518 | 0.367 | 0.113 | 2.51E-19 | H-cluster3 |
| PRG41    | 1.47E-23 | 1.213349 | 0.417 | 0.151 | 2.75E-19 | H-cluster3 |
| FN11     | 1.63E-23 | 0.951998 | 0.595 | 0.316 | 3.05E-19 | H-cluster3 |
| RPL21    | 2.55E-23 | 0.592493 | 0.348 | 0.104 | 4.76E-19 | H-cluster3 |
| DDAH2    | 2.77E-23 | 0.378716 | 0.326 | 0.091 | 5.19E-19 | H-cluster3 |
| FOSB     | 2.92E-23 | 0.954567 | 0.413 | 0.145 | 5.45E-19 | H-cluster3 |
| RPS15A   | 3.10E-23 | 0.531285 | 0.348 | 0.103 | 5.79E-19 | H-cluster3 |
| P4HB     | 3.32E-23 | 0.39653  | 0.333 | 0.092 | 6.20E-19 | H-cluster3 |
| RPL37    | 3.36E-23 | 0.647423 | 0.455 | 0.177 | 6.28E-19 | H-cluster3 |
| LAMP1    | 4.88E-23 | 0.394047 | 0.356 | 0.104 | 9.14E-19 | H-cluster3 |
| RPS6     | 5.19E-23 | 0.6645   | 0.458 | 0.183 | 9.71E-19 | H-cluster3 |
| PMEPA1   | 5.42E-23 | 0.526088 | 0.288 | 0.072 | 1.01E-18 | H-cluster3 |
| PCOLCE   | 8.30E-23 | 0.616482 | 0.428 | 0.158 | 1.55E-18 | H-cluster3 |
| SPSB41   | 1.41E-22 | 0.467151 | 0.352 | 0.105 | 2.64E-18 | H-cluster3 |
| HLA-B    | 1.86E-22 | 0.600939 | 0.572 | 0.258 | 3.48E-18 | H-cluster3 |
| PFN1     | 1.99E-22 | 0.410118 | 0.318 | 0.088 | 3.72E-18 | H-cluster3 |
| TMA7     | 2.31E-22 | 0.390681 | 0.28  | 0.068 | 4.31E-18 | H-cluster3 |
| RHOA     | 2.63E-22 | 0.596978 | 0.614 | 0.298 | 4.91E-18 | H-cluster3 |
| GNAI2    | 2.80E-22 | 0.342908 | 0.284 | 0.071 | 5.24E-18 | H-cluster3 |
| SCARA51  | 3.02E-22 | 0.638867 | 0.67  | 0.394 | 5.64E-18 | H-cluster3 |
| MEDAG    | 4.23E-22 | 0.777673 | 0.561 | 0.277 | 7.92E-18 | H-cluster3 |
| SDCBP    | 4.49E-22 | 0.548852 | 0.492 | 0.201 | 8.40E-18 | H-cluster3 |
| SOD1     | 4.94E-22 | 0.329585 | 0.299 | 0.08  | 9.24E-18 | H-cluster3 |
| ATP6AP2  | 6.55E-22 | 0.391319 | 0.277 | 0.07  | 1.22E-17 | H-cluster3 |
| RPLP0    | 8.02E-22 | 0.559697 | 0.413 | 0.153 | 1.50E-17 | H-cluster3 |

|           |          |          |       |       |          |            |
|-----------|----------|----------|-------|-------|----------|------------|
| PDGFRA    | 8.74E-22 | 0.480458 | 0.386 | 0.134 | 1.63E-17 | H-cluster3 |
| TSC22D3   | 9.12E-22 | 0.475832 | 0.311 | 0.089 | 1.71E-17 | H-cluster3 |
| DACT2     | 1.35E-21 | 0.485782 | 0.269 | 0.066 | 2.52E-17 | H-cluster3 |
| MYL12A    | 1.48E-21 | 0.406734 | 0.288 | 0.077 | 2.77E-17 | H-cluster3 |
| HSP90AA1  | 2.36E-21 | 0.598728 | 0.545 | 0.252 | 4.42E-17 | H-cluster3 |
| CD59      | 2.89E-21 | 0.548774 | 0.367 | 0.127 | 5.41E-17 | H-cluster3 |
| SELENOS   | 4.27E-21 | 0.443413 | 0.341 | 0.108 | 7.99E-17 | H-cluster3 |
| ARF1      | 4.42E-21 | 0.334712 | 0.318 | 0.092 | 8.26E-17 | H-cluster3 |
| DYNLL1    | 4.72E-21 | 0.357807 | 0.292 | 0.078 | 8.82E-17 | H-cluster3 |
| NT5E      | 7.04E-21 | 0.616367 | 0.409 | 0.154 | 1.32E-16 | H-cluster3 |
| COL1A1    | 8.40E-21 | 1.26442  | 0.564 | 0.316 | 1.57E-16 | H-cluster3 |
| LTBP11    | 9.50E-21 | 0.642991 | 0.538 | 0.239 | 1.78E-16 | H-cluster3 |
| RPL37A    | 9.56E-21 | 0.600505 | 0.428 | 0.171 | 1.79E-16 | H-cluster3 |
| NTM1      | 1.34E-20 | 0.655116 | 0.67  | 0.366 | 2.50E-16 | H-cluster3 |
| ARF4      | 1.36E-20 | 0.453649 | 0.405 | 0.146 | 2.55E-16 | H-cluster3 |
| PCBP1     | 1.59E-20 | 0.353661 | 0.277 | 0.073 | 2.98E-16 | H-cluster3 |
| HLA-E     | 1.63E-20 | 0.559178 | 0.405 | 0.151 | 3.06E-16 | H-cluster3 |
| GJA1      | 1.80E-20 | 0.447443 | 0.303 | 0.089 | 3.38E-16 | H-cluster3 |
| RPL35     | 2.16E-20 | 0.485348 | 0.402 | 0.147 | 4.04E-16 | H-cluster3 |
| C1S       | 2.22E-20 | 0.789821 | 0.67  | 0.434 | 4.15E-16 | H-cluster3 |
| SET       | 2.50E-20 | 0.313781 | 0.254 | 0.062 | 4.67E-16 | H-cluster3 |
| ALDH1A3   | 2.60E-20 | 0.699146 | 0.36  | 0.125 | 4.86E-16 | H-cluster3 |
| HSP90B1   | 3.54E-20 | 0.533282 | 0.405 | 0.158 | 6.61E-16 | H-cluster3 |
| DDX21     | 3.76E-20 | 0.57533  | 0.303 | 0.09  | 7.03E-16 | H-cluster3 |
| PCOLCE21  | 4.16E-20 | 0.610722 | 0.629 | 0.338 | 7.78E-16 | H-cluster3 |
| RPS29     | 4.22E-20 | 0.656407 | 0.496 | 0.226 | 7.89E-16 | H-cluster3 |
| GUCY1A21  | 4.36E-20 | 0.604836 | 0.439 | 0.171 | 8.16E-16 | H-cluster3 |
| ADAMTS21  | 4.52E-20 | 0.5149   | 0.542 | 0.245 | 8.45E-16 | H-cluster3 |
| PLEKHA7   | 5.38E-20 | 0.448621 | 0.36  | 0.121 | 1.01E-15 | H-cluster3 |
| CRY1      | 5.61E-20 | 0.593318 | 0.386 | 0.137 | 1.05E-15 | H-cluster3 |
| NFKBIA    | 5.90E-20 | 0.581958 | 0.33  | 0.106 | 1.10E-15 | H-cluster3 |
| HIC1      | 6.00E-20 | 0.337257 | 0.265 | 0.07  | 1.12E-15 | H-cluster3 |
| FBLN2     | 6.89E-20 | 0.850477 | 0.629 | 0.411 | 1.29E-15 | H-cluster3 |
| BSG       | 7.22E-20 | 0.297096 | 0.269 | 0.072 | 1.35E-15 | H-cluster3 |
| EEF1D     | 8.30E-20 | 0.423246 | 0.364 | 0.125 | 1.55E-15 | H-cluster3 |
| COL6A2    | 8.91E-20 | 0.692521 | 0.769 | 0.585 | 1.67E-15 | H-cluster3 |
| C14orf132 | 9.40E-20 | 0.275265 | 0.265 | 0.067 | 1.76E-15 | H-cluster3 |
| ZYX       | 9.66E-20 | 0.319872 | 0.28  | 0.076 | 1.81E-15 | H-cluster3 |
| SMURF21   | 1.09E-19 | 0.620082 | 0.803 | 0.516 | 2.03E-15 | H-cluster3 |
| NNMT      | 1.19E-19 | 0.592359 | 0.587 | 0.295 | 2.22E-15 | H-cluster3 |
| TPM4      | 1.27E-19 | 0.506927 | 0.379 | 0.134 | 2.37E-15 | H-cluster3 |
| ANKRD30B  |          |          |       |       |          |            |
| L         | 1.76E-19 | 0.918192 | 0.542 | 0.263 | 3.28E-15 | H-cluster3 |
| ADGRD11   | 1.84E-19 | 0.633803 | 0.583 | 0.281 | 3.43E-15 | H-cluster3 |
| RRBP1     | 2.07E-19 | 0.467182 | 0.591 | 0.296 | 3.88E-15 | H-cluster3 |
| MGAT1     | 2.73E-19 | 0.32372  | 0.284 | 0.081 | 5.10E-15 | H-cluster3 |
| RPS28     | 2.88E-19 | 0.336882 | 0.261 | 0.069 | 5.38E-15 | H-cluster3 |

|          |          |          |       |       |          |            |
|----------|----------|----------|-------|-------|----------|------------|
| RPL6     | 2.97E-19 | 0.523863 | 0.394 | 0.152 | 5.56E-15 | H-cluster3 |
| NACA     | 3.06E-19 | 0.470067 | 0.337 | 0.116 | 5.73E-15 | H-cluster3 |
| PNRC1    | 3.35E-19 | 0.437675 | 0.326 | 0.103 | 6.27E-15 | H-cluster3 |
| CD164    | 4.47E-19 | 0.439861 | 0.383 | 0.143 | 8.36E-15 | H-cluster3 |
| PEBP1    | 5.33E-19 | 0.390162 | 0.288 | 0.084 | 9.97E-15 | H-cluster3 |
| RPL30    | 5.72E-19 | 0.663853 | 0.496 | 0.24  | 1.07E-14 | H-cluster3 |
| CHD1     | 6.44E-19 | 0.997965 | 0.523 | 0.268 | 1.20E-14 | H-cluster3 |
| ATP5B    | 6.68E-19 | 0.303878 | 0.269 | 0.075 | 1.25E-14 | H-cluster3 |
| GALNT151 | 7.29E-19 | 0.431602 | 0.443 | 0.175 | 1.36E-14 | H-cluster3 |
| EGR1     | 7.47E-19 | 0.872671 | 0.424 | 0.185 | 1.40E-14 | H-cluster3 |
| EIF5     | 8.42E-19 | 0.517089 | 0.417 | 0.165 | 1.58E-14 | H-cluster3 |
| GPNMB    | 8.53E-19 | 0.555708 | 0.432 | 0.186 | 1.60E-14 | H-cluster3 |
| DAZAP2   | 1.17E-18 | 0.298434 | 0.295 | 0.088 | 2.18E-14 | H-cluster3 |
| OAT      | 1.51E-18 | 0.255437 | 0.292 | 0.085 | 2.83E-14 | H-cluster3 |
| AHNAK    | 1.75E-18 | 0.676271 | 0.678 | 0.5   | 3.28E-14 | H-cluster3 |
| GPX4     | 2.01E-18 | 0.443104 | 0.405 | 0.159 | 3.76E-14 | H-cluster3 |
| CTSK     | 2.06E-18 | 0.414569 | 0.333 | 0.114 | 3.85E-14 | H-cluster3 |
| EMILIN21 | 2.34E-18 | 0.626705 | 0.42  | 0.18  | 4.38E-14 | H-cluster3 |
| CTSL     | 2.49E-18 | 0.466945 | 0.322 | 0.106 | 4.66E-14 | H-cluster3 |
| KLF9     | 2.92E-18 | 0.513275 | 0.451 | 0.188 | 5.47E-14 | H-cluster3 |
| ATP1A1   | 3.10E-18 | 0.487465 | 0.311 | 0.102 | 5.79E-14 | H-cluster3 |
| ZSWIM6   | 3.25E-18 | 0.978253 | 0.663 | 0.412 | 6.09E-14 | H-cluster3 |
| PSMA7    | 4.26E-18 | 0.273081 | 0.269 | 0.075 | 7.97E-14 | H-cluster3 |
| COL6A1   | 4.28E-18 | 0.777899 | 0.636 | 0.432 | 8.00E-14 | H-cluster3 |
| SURF4    | 4.65E-18 | 0.281485 | 0.299 | 0.093 | 8.70E-14 | H-cluster3 |
| CHRD1    | 4.85E-18 | 0.550009 | 0.47  | 0.215 | 9.08E-14 | H-cluster3 |
| HEG11    | 7.08E-18 | 0.592584 | 0.568 | 0.298 | 1.32E-13 | H-cluster3 |
| SLC39A14 | 7.49E-18 | 0.760665 | 0.258 | 0.073 | 1.40E-13 | H-cluster3 |
| YWHAB    | 8.24E-18 | 0.372572 | 0.39  | 0.151 | 1.54E-13 | H-cluster3 |
| NECTIN2  | 9.37E-18 | 0.414152 | 0.303 | 0.097 | 1.75E-13 | H-cluster3 |
| OS9      | 1.08E-17 | 0.366035 | 0.318 | 0.104 | 2.02E-13 | H-cluster3 |
| SKI      | 1.18E-17 | 0.455599 | 0.545 | 0.262 | 2.20E-13 | H-cluster3 |
| HFM1     | 1.22E-17 | 0.674069 | 0.712 | 0.49  | 2.28E-13 | H-cluster3 |
| S100A13  | 1.23E-17 | 0.459682 | 0.402 | 0.163 | 2.29E-13 | H-cluster3 |
| SPSB1    | 1.26E-17 | 0.868694 | 0.527 | 0.269 | 2.36E-13 | H-cluster3 |
| CYP4B1   | 1.44E-17 | 0.416649 | 0.337 | 0.119 | 2.70E-13 | H-cluster3 |
| TES      | 1.91E-17 | 0.39091  | 0.28  | 0.086 | 3.58E-13 | H-cluster3 |
| PLTP     | 4.21E-17 | 0.420859 | 0.356 | 0.135 | 7.88E-13 | H-cluster3 |
| PAMR11   | 4.30E-17 | 0.43153  | 0.523 | 0.233 | 8.04E-13 | H-cluster3 |
| HRH11    | 5.13E-17 | 0.720999 | 0.371 | 0.148 | 9.59E-13 | H-cluster3 |
| KCNAB11  | 5.54E-17 | 0.502335 | 0.549 | 0.271 | 1.04E-12 | H-cluster3 |
| NPR1     | 5.81E-17 | 0.340264 | 0.258 | 0.075 | 1.09E-12 | H-cluster3 |
| CNTN41   | 6.41E-17 | 0.43013  | 0.716 | 0.394 | 1.20E-12 | H-cluster3 |
| DLGAP41  | 6.56E-17 | 0.422175 | 0.538 | 0.261 | 1.23E-12 | H-cluster3 |
| CD151    | 6.92E-17 | 0.315096 | 0.265 | 0.081 | 1.29E-12 | H-cluster3 |
| NAMPT    | 7.06E-17 | 1.018739 | 0.326 | 0.124 | 1.32E-12 | H-cluster3 |
| CALM1    | 7.84E-17 | 0.376644 | 0.383 | 0.15  | 1.47E-12 | H-cluster3 |

|          |          |          |       |       |          |            |
|----------|----------|----------|-------|-------|----------|------------|
| VEGFA    | 9.77E-17 | 0.404651 | 0.371 | 0.145 | 1.83E-12 | H-cluster3 |
| ANXA1    | 9.82E-17 | 0.62708  | 0.561 | 0.326 | 1.84E-12 | H-cluster3 |
| ARHGDIA  | 1.01E-16 | 0.376259 | 0.337 | 0.121 | 1.89E-12 | H-cluster3 |
| AEBP1    | 1.02E-16 | 0.5177   | 0.402 | 0.171 | 1.91E-12 | H-cluster3 |
| NEDD91   | 1.05E-16 | 0.479161 | 0.371 | 0.144 | 1.96E-12 | H-cluster3 |
| YWHAQ    | 1.35E-16 | 0.432171 | 0.504 | 0.237 | 2.52E-12 | H-cluster3 |
| DDX5     | 1.51E-16 | 0.513714 | 0.731 | 0.48  | 2.82E-12 | H-cluster3 |
| ESYT2    | 1.74E-16 | 0.675429 | 0.727 | 0.473 | 3.26E-12 | H-cluster3 |
| ENO1     | 2.41E-16 | 0.352484 | 0.269 | 0.083 | 4.51E-12 | H-cluster3 |
| EIF1AX   | 2.69E-16 | 0.339629 | 0.322 | 0.116 | 5.03E-12 | H-cluster3 |
| PCYOX1   | 2.73E-16 | 0.315275 | 0.314 | 0.107 | 5.10E-12 | H-cluster3 |
| SLC4A41  | 2.98E-16 | 0.492345 | 0.466 | 0.211 | 5.58E-12 | H-cluster3 |
| EFHD1    | 3.68E-16 | 0.428214 | 0.417 | 0.175 | 6.89E-12 | H-cluster3 |
| ELOVL5   | 4.09E-16 | 0.908879 | 0.375 | 0.155 | 7.65E-12 | H-cluster3 |
| PDE1C1   | 4.25E-16 | 0.509185 | 0.47  | 0.214 | 7.94E-12 | H-cluster3 |
| DIAPH11  | 4.44E-16 | 0.436356 | 0.504 | 0.24  | 8.31E-12 | H-cluster3 |
| YBX1     | 5.03E-16 | 0.350626 | 0.307 | 0.108 | 9.42E-12 | H-cluster3 |
| COX6C    | 5.40E-16 | 0.301784 | 0.269 | 0.085 | 1.01E-11 | H-cluster3 |
| GLUL     | 5.43E-16 | 0.344069 | 0.405 | 0.166 | 1.02E-11 | H-cluster3 |
| PPP1R15A | 5.72E-16 | 0.327964 | 0.273 | 0.087 | 1.07E-11 | H-cluster3 |
| GSN      | 8.12E-16 | 1.116198 | 0.758 | 0.701 | 1.52E-11 | H-cluster3 |
| SERPINF1 | 9.72E-16 | 0.585676 | 0.417 | 0.203 | 1.82E-11 | H-cluster3 |
| MYL9     | 1.03E-15 | 0.293978 | 0.371 | 0.143 | 1.92E-11 | H-cluster3 |
| SEMA3C1  | 1.11E-15 | 0.290093 | 0.837 | 0.503 | 2.08E-11 | H-cluster3 |
| TRIR     | 1.30E-15 | 0.305909 | 0.311 | 0.109 | 2.43E-11 | H-cluster3 |
| RPN1     | 1.35E-15 | 0.294886 | 0.277 | 0.089 | 2.53E-11 | H-cluster3 |
| TOB2     | 1.53E-15 | 0.422904 | 0.322 | 0.121 | 2.87E-11 | H-cluster3 |
| ATP13A3  | 1.59E-15 | 0.701166 | 0.527 | 0.273 | 2.98E-11 | H-cluster3 |
| HINT1    | 1.60E-15 | 0.257733 | 0.265 | 0.085 | 2.99E-11 | H-cluster3 |
| KLF13    | 1.82E-15 | 0.255484 | 0.314 | 0.109 | 3.40E-11 | H-cluster3 |
| PTHLH    | 2.16E-15 | 0.573246 | 0.277 | 0.093 | 4.04E-11 | H-cluster3 |
| REEP5    | 2.28E-15 | 0.363417 | 0.413 | 0.179 | 4.27E-11 | H-cluster3 |
| ADAMTSL4 |          |          |       |       |          |            |
| 1        | 2.44E-15 | 0.28739  | 0.405 | 0.17  | 4.56E-11 | H-cluster3 |
| HTRA3    | 2.65E-15 | 0.684743 | 0.534 | 0.309 | 4.97E-11 | H-cluster3 |
| PRNP     | 2.96E-15 | 0.294726 | 0.269 | 0.089 | 5.53E-11 | H-cluster3 |
| HTRA1    | 2.97E-15 | 0.403929 | 0.292 | 0.103 | 5.55E-11 | H-cluster3 |
| SSR3     | 3.70E-15 | 0.367912 | 0.314 | 0.116 | 6.93E-11 | H-cluster3 |
| ITGA111  | 4.19E-15 | 0.405421 | 0.636 | 0.346 | 7.83E-11 | H-cluster3 |
| ZNF90    | 5.49E-15 | 0.352014 | 0.311 | 0.115 | 1.03E-10 | H-cluster3 |
| ZFP36L2  | 6.20E-15 | 0.571624 | 0.568 | 0.336 | 1.16E-10 | H-cluster3 |
| CHST15   | 6.41E-15 | 0.404145 | 0.261 | 0.086 | 1.20E-10 | H-cluster3 |
| IL4R     | 7.08E-15 | 0.290732 | 0.428 | 0.184 | 1.33E-10 | H-cluster3 |
| SRSF3    | 7.75E-15 | 0.455681 | 0.436 | 0.205 | 1.45E-10 | H-cluster3 |
| ADGRG21  | 7.97E-15 | 0.449149 | 0.33  | 0.129 | 1.49E-10 | H-cluster3 |
| RTN4     | 9.20E-15 | 0.536517 | 0.758 | 0.543 | 1.72E-10 | H-cluster3 |
| PSMB1    | 1.23E-14 | 0.309062 | 0.303 | 0.11  | 2.31E-10 | H-cluster3 |

|           |          |          |       |       |          |            |
|-----------|----------|----------|-------|-------|----------|------------|
| ZBTB7A    | 1.40E-14 | 0.395405 | 0.39  | 0.171 | 2.62E-10 | H-cluster3 |
| PTTG1IP   | 1.58E-14 | 0.257158 | 0.295 | 0.105 | 2.96E-10 | H-cluster3 |
| PKM       | 1.75E-14 | 0.428526 | 0.261 | 0.088 | 3.28E-10 | H-cluster3 |
| LITAF     | 1.91E-14 | 0.474582 | 0.318 | 0.123 | 3.57E-10 | H-cluster3 |
| FGFR1     | 2.31E-14 | 0.59577  | 0.689 | 0.478 | 4.32E-10 | H-cluster3 |
| PALM1     | 2.33E-14 | 0.363468 | 0.508 | 0.25  | 4.36E-10 | H-cluster3 |
| PXDC1     | 2.43E-14 | 0.390067 | 0.269 | 0.092 | 4.55E-10 | H-cluster3 |
| NTN4      | 2.45E-14 | 0.57267  | 0.379 | 0.165 | 4.59E-10 | H-cluster3 |
| TXNRD1    | 2.74E-14 | 0.485243 | 0.564 | 0.328 | 5.13E-10 | H-cluster3 |
| PLEKHM2   | 3.45E-14 | 0.451329 | 0.443 | 0.211 | 6.44E-10 | H-cluster3 |
| EIF2S2    | 3.75E-14 | 0.277076 | 0.295 | 0.106 | 7.02E-10 | H-cluster3 |
| ABHD2     | 3.89E-14 | 0.36593  | 0.333 | 0.13  | 7.28E-10 | H-cluster3 |
| ETF1      | 4.19E-14 | 0.43622  | 0.307 | 0.116 | 7.84E-10 | H-cluster3 |
| STAT3     | 4.83E-14 | 0.638705 | 0.629 | 0.375 | 9.03E-10 | H-cluster3 |
| TMTC11    | 4.86E-14 | 0.501479 | 0.576 | 0.329 | 9.08E-10 | H-cluster3 |
| EGLN1     | 4.87E-14 | 0.438564 | 0.352 | 0.146 | 9.10E-10 | H-cluster3 |
| SCPEP1    | 4.91E-14 | 0.345552 | 0.288 | 0.104 | 9.19E-10 | H-cluster3 |
| CYB5R3    | 5.81E-14 | 0.321476 | 0.307 | 0.118 | 1.09E-09 | H-cluster3 |
| PRRX2     | 6.04E-14 | 0.311544 | 0.318 | 0.122 | 1.13E-09 | H-cluster3 |
| RHEB      | 7.77E-14 | 0.382669 | 0.341 | 0.137 | 1.45E-09 | H-cluster3 |
| CSF1      | 1.09E-13 | 0.409581 | 0.356 | 0.158 | 2.04E-09 | H-cluster3 |
| AXL1      | 1.15E-13 | 0.554584 | 0.693 | 0.468 | 2.15E-09 | H-cluster3 |
| CAPZB     | 1.17E-13 | 0.396648 | 0.549 | 0.29  | 2.19E-09 | H-cluster3 |
| YWHAG     | 1.20E-13 | 0.461633 | 0.375 | 0.163 | 2.25E-09 | H-cluster3 |
| CCNL1     | 1.22E-13 | 0.572354 | 0.561 | 0.328 | 2.28E-09 | H-cluster3 |
| SQSTM1    | 1.53E-13 | 0.615063 | 0.485 | 0.269 | 2.87E-09 | H-cluster3 |
| PLCB11    | 1.55E-13 | 0.428102 | 0.765 | 0.509 | 2.90E-09 | H-cluster3 |
| NCL       | 1.68E-13 | 0.344365 | 0.337 | 0.139 | 3.15E-09 | H-cluster3 |
| WNT2B     | 1.80E-13 | 0.321343 | 0.273 | 0.099 | 3.36E-09 | H-cluster3 |
| PFDN5     | 1.81E-13 | 0.357496 | 0.36  | 0.157 | 3.38E-09 | H-cluster3 |
| STK32B1   | 1.83E-13 | 0.347348 | 0.553 | 0.288 | 3.42E-09 | H-cluster3 |
| EIF4G1    | 1.83E-13 | 0.335406 | 0.292 | 0.11  | 3.43E-09 | H-cluster3 |
| SRPX2     | 2.61E-13 | 0.447547 | 0.534 | 0.291 | 4.89E-09 | H-cluster3 |
| SIK3      | 2.97E-13 | 0.542603 | 0.792 | 0.574 | 5.55E-09 | H-cluster3 |
| STK17A    | 3.06E-13 | 0.471875 | 0.326 | 0.137 | 5.72E-09 | H-cluster3 |
| GABARAPL1 | 3.34E-13 | 0.3987   | 0.33  | 0.136 | 6.24E-09 | H-cluster3 |
| TIPARP    | 3.56E-13 | 0.34351  | 0.303 | 0.119 | 6.66E-09 | H-cluster3 |
| METTL7A   | 3.64E-13 | 0.341053 | 0.348 | 0.146 | 6.81E-09 | H-cluster3 |
| DSTN      | 3.74E-13 | 0.396627 | 0.519 | 0.286 | 6.99E-09 | H-cluster3 |
| PCSK61    | 3.77E-13 | 0.447087 | 0.576 | 0.328 | 7.05E-09 | H-cluster3 |
| KCNB21    | 3.88E-13 | 0.300262 | 0.53  | 0.267 | 7.26E-09 | H-cluster3 |
| ABL1      | 3.90E-13 | 0.513934 | 0.727 | 0.514 | 7.30E-09 | H-cluster3 |
| SREBF1    | 4.63E-13 | 0.328419 | 0.337 | 0.141 | 8.66E-09 | H-cluster3 |
| ATP6V0E1  | 5.05E-13 | 0.302698 | 0.375 | 0.163 | 9.45E-09 | H-cluster3 |
| OGDH1     | 8.92E-13 | 0.428652 | 0.511 | 0.275 | 1.67E-08 | H-cluster3 |
| LTBP3     | 9.56E-13 | 0.361846 | 0.477 | 0.253 | 1.79E-08 | H-cluster3 |



|           |          |          |       |       |          |            |
|-----------|----------|----------|-------|-------|----------|------------|
| COL12A11  | 9.58E-13 | 0.572451 | 0.538 | 0.299 | 1.79E-08 | H-cluster3 |
| CCNI      | 1.01E-12 | 0.403795 | 0.504 | 0.274 | 1.89E-08 | H-cluster3 |
| FBLN1     | 1.12E-12 | 0.664867 | 0.712 | 0.565 | 2.09E-08 | H-cluster3 |
| LRP1      | 1.13E-12 | 0.542863 | 0.625 | 0.46  | 2.11E-08 | H-cluster3 |
| ZNF331    | 1.13E-12 | 0.453312 | 0.311 | 0.125 | 2.12E-08 | H-cluster3 |
| MYO1C     | 1.47E-12 | 0.261438 | 0.277 | 0.103 | 2.75E-08 | H-cluster3 |
| AMD1      | 1.75E-12 | 0.390024 | 0.261 | 0.097 | 3.28E-08 | H-cluster3 |
| FERMT2    | 1.84E-12 | 0.606053 | 0.606 | 0.379 | 3.45E-08 | H-cluster3 |
| PROCR1    | 2.05E-12 | 0.458912 | 0.595 | 0.361 | 3.83E-08 | H-cluster3 |
| CNN3      | 2.07E-12 | 0.310784 | 0.348 | 0.153 | 3.87E-08 | H-cluster3 |
| PNPLA8    | 2.45E-12 | 0.387294 | 0.326 | 0.141 | 4.59E-08 | H-cluster3 |
| LOXL11    | 2.56E-12 | 0.256306 | 0.333 | 0.136 | 4.79E-08 | H-cluster3 |
| PDE3A     | 2.58E-12 | 0.555819 | 0.678 | 0.476 | 4.83E-08 | H-cluster3 |
| NDRG1     | 2.81E-12 | 0.376045 | 0.485 | 0.267 | 5.25E-08 | H-cluster3 |
| ABLIM11   | 3.28E-12 | 0.360303 | 0.769 | 0.513 | 6.14E-08 | H-cluster3 |
| HDLBP     | 3.33E-12 | 0.348489 | 0.5   | 0.265 | 6.22E-08 | H-cluster3 |
| POLR2A    | 4.59E-12 | 0.328857 | 0.337 | 0.148 | 8.58E-08 | H-cluster3 |
| SGMS2     | 5.31E-12 | 0.490802 | 0.284 | 0.115 | 9.93E-08 | H-cluster3 |
| FHL1      | 5.34E-12 | 0.400772 | 0.432 | 0.219 | 9.99E-08 | H-cluster3 |
| SDK11     | 5.90E-12 | 0.262253 | 0.89  | 0.658 | 1.10E-07 | H-cluster3 |
| CCDC80    | 7.47E-12 | 0.802199 | 0.648 | 0.479 | 1.40E-07 | H-cluster3 |
| ELN1      | 7.95E-12 | 0.493083 | 0.572 | 0.342 | 1.49E-07 | H-cluster3 |
| HUNK1     | 8.18E-12 | 0.346852 | 0.394 | 0.185 | 1.53E-07 | H-cluster3 |
| NHSL11    | 8.68E-12 | 0.459576 | 0.61  | 0.369 | 1.62E-07 | H-cluster3 |
| ABCG1     | 8.72E-12 | 0.350362 | 0.265 | 0.103 | 1.63E-07 | H-cluster3 |
| PDLIM71   | 9.70E-12 | 0.305618 | 0.367 | 0.168 | 1.81E-07 | H-cluster3 |
| FCGRT     | 1.05E-11 | 0.280906 | 0.364 | 0.167 | 1.96E-07 | H-cluster3 |
| NFATC1    | 1.18E-11 | 0.408609 | 0.258 | 0.1   | 2.22E-07 | H-cluster3 |
| YWHAZ     | 1.23E-11 | 0.446339 | 0.561 | 0.335 | 2.31E-07 | H-cluster3 |
| CALU1     | 1.31E-11 | 0.313658 | 0.458 | 0.234 | 2.45E-07 | H-cluster3 |
| COL1A2    | 1.33E-11 | 0.769316 | 0.746 | 0.689 | 2.49E-07 | H-cluster3 |
| SOD2      | 1.48E-11 | 1.049462 | 0.455 | 0.25  | 2.77E-07 | H-cluster3 |
| SMC1A     | 1.66E-11 | 0.270112 | 0.265 | 0.103 | 3.11E-07 | H-cluster3 |
| YBX3      | 2.05E-11 | 0.417459 | 0.557 | 0.345 | 3.84E-07 | H-cluster3 |
| GAS71     | 2.43E-11 | 0.776459 | 0.799 | 0.625 | 4.55E-07 | H-cluster3 |
| EIF4G2    | 2.84E-11 | 0.2987   | 0.436 | 0.224 | 5.31E-07 | H-cluster3 |
| FAM107B1  | 3.09E-11 | 0.397112 | 0.413 | 0.208 | 5.77E-07 | H-cluster3 |
| HNRNPF    | 3.54E-11 | 0.33766  | 0.322 | 0.145 | 6.62E-07 | H-cluster3 |
| UGP2      | 4.12E-11 | 0.747835 | 0.5   | 0.287 | 7.70E-07 | H-cluster3 |
| DDX3X     | 4.20E-11 | 0.354576 | 0.447 | 0.24  | 7.85E-07 | H-cluster3 |
| ARMC9     | 4.64E-11 | 0.308123 | 0.36  | 0.171 | 8.69E-07 | H-cluster3 |
| BASP11    | 4.75E-11 | 0.336705 | 0.379 | 0.182 | 8.88E-07 | H-cluster3 |
| TSC22D2   | 5.16E-11 | 0.652778 | 0.473 | 0.261 | 9.65E-07 | H-cluster3 |
| KIAA14561 | 5.66E-11 | 0.411866 | 0.326 | 0.147 | 1.06E-06 | H-cluster3 |
| XYLT1     | 5.77E-11 | 0.717295 | 0.58  | 0.371 | 1.08E-06 | H-cluster3 |
| UBE2I     | 5.91E-11 | 0.343248 | 0.288 | 0.12  | 1.11E-06 | H-cluster3 |
| RPL31     | 6.71E-11 | 0.268025 | 0.28  | 0.114 | 1.25E-06 | H-cluster3 |

|          |          |          |       |       |          |            |
|----------|----------|----------|-------|-------|----------|------------|
| SH3BP5   | 6.82E-11 | 0.440438 | 0.542 | 0.329 | 1.28E-06 | H-cluster3 |
| MORF4L2  | 7.75E-11 | 0.348467 | 0.439 | 0.232 | 1.45E-06 | H-cluster3 |
| MXRA8    | 8.16E-11 | 0.370514 | 0.477 | 0.276 | 1.53E-06 | H-cluster3 |
| HK1      | 8.32E-11 | 0.392836 | 0.273 | 0.113 | 1.56E-06 | H-cluster3 |
| JDP2     | 9.12E-11 | 0.391542 | 0.356 | 0.168 | 1.71E-06 | H-cluster3 |
| SKP1     | 9.53E-11 | 0.258899 | 0.383 | 0.188 | 1.78E-06 | H-cluster3 |
| KLF3     | 9.61E-11 | 0.440991 | 0.436 | 0.241 | 1.80E-06 | H-cluster3 |
| EIF3H    | 9.79E-11 | 0.316826 | 0.367 | 0.174 | 1.83E-06 | H-cluster3 |
| SLC2A3   | 1.08E-10 | 0.635862 | 0.28  | 0.125 | 2.01E-06 | H-cluster3 |
| TGFBR11  | 1.08E-10 | 0.325339 | 0.436 | 0.223 | 2.02E-06 | H-cluster3 |
| IL13RA1  | 1.10E-10 | 0.324039 | 0.379 | 0.185 | 2.06E-06 | H-cluster3 |
| RALY     | 1.12E-10 | 0.39399  | 0.432 | 0.231 | 2.10E-06 | H-cluster3 |
| SSC5D    | 1.23E-10 | 0.328727 | 0.292 | 0.128 | 2.30E-06 | H-cluster3 |
| SHISA61  | 1.29E-10 | 0.389048 | 0.265 | 0.11  | 2.41E-06 | H-cluster3 |
| UBA1     | 1.37E-10 | 0.30869  | 0.288 | 0.125 | 2.56E-06 | H-cluster3 |
| CPXM21   | 1.72E-10 | 0.351925 | 0.405 | 0.208 | 3.21E-06 | H-cluster3 |
| MORF4L1  | 1.88E-10 | 0.31696  | 0.473 | 0.266 | 3.51E-06 | H-cluster3 |
| MCL1     | 2.55E-10 | 0.362528 | 0.375 | 0.193 | 4.77E-06 | H-cluster3 |
| TMOD3    | 3.15E-10 | 0.333243 | 0.447 | 0.243 | 5.89E-06 | H-cluster3 |
| SMAD3    | 3.52E-10 | 0.407708 | 0.689 | 0.466 | 6.58E-06 | H-cluster3 |
| KPNA4    | 4.18E-10 | 0.31841  | 0.398 | 0.203 | 7.82E-06 | H-cluster3 |
| PSD31    | 4.48E-10 | 0.367207 | 0.674 | 0.423 | 8.39E-06 | H-cluster3 |
| ERCC1    | 5.27E-10 | 0.350671 | 0.322 | 0.151 | 9.86E-06 | H-cluster3 |
| SLC38A2  | 5.56E-10 | 0.387056 | 0.409 | 0.221 | 1.04E-05 | H-cluster3 |
| HECA     | 5.71E-10 | 0.344446 | 0.261 | 0.11  | 1.07E-05 | H-cluster3 |
| ZC3HAV1  | 6.17E-10 | 0.466953 | 0.424 | 0.234 | 1.15E-05 | H-cluster3 |
| IGFBP4   | 6.32E-10 | 0.27359  | 0.375 | 0.185 | 1.18E-05 | H-cluster3 |
| CAMK1D1  | 7.20E-10 | 0.311057 | 0.67  | 0.418 | 1.35E-05 | H-cluster3 |
| DCN      | 7.41E-10 | 0.820967 | 0.742 | 0.798 | 1.39E-05 | H-cluster3 |
| SRSF7    | 7.67E-10 | 0.305362 | 0.413 | 0.226 | 1.43E-05 | H-cluster3 |
| HERPUD1  | 7.68E-10 | 0.273872 | 0.299 | 0.131 | 1.44E-05 | H-cluster3 |
| SLC20A1  | 8.31E-10 | 0.341373 | 0.28  | 0.126 | 1.56E-05 | H-cluster3 |
| NDEL1    | 9.87E-10 | 0.369097 | 0.348 | 0.172 | 1.85E-05 | H-cluster3 |
| ACSL4    | 1.06E-09 | 1.040524 | 0.455 | 0.267 | 1.99E-05 | H-cluster3 |
| RAB7A    | 1.13E-09 | 0.467768 | 0.564 | 0.348 | 2.11E-05 | H-cluster3 |
| LRRC171  | 1.14E-09 | 0.287926 | 0.299 | 0.14  | 2.13E-05 | H-cluster3 |
| AGO2     | 1.15E-09 | 0.314281 | 0.462 | 0.258 | 2.14E-05 | H-cluster3 |
| ITGB1    | 1.19E-09 | 0.266245 | 0.504 | 0.3   | 2.23E-05 | H-cluster3 |
| FILIP1L  | 1.24E-09 | 0.438027 | 0.42  | 0.239 | 2.32E-05 | H-cluster3 |
| AHCYL1   | 1.30E-09 | 0.28557  | 0.383 | 0.196 | 2.44E-05 | H-cluster3 |
| REL      | 1.51E-09 | 0.542407 | 0.284 | 0.13  | 2.82E-05 | H-cluster3 |
| TNFRSF1A | 1.75E-09 | 0.288581 | 0.307 | 0.144 | 3.28E-05 | H-cluster3 |
| SYNCRIP  | 2.07E-09 | 0.25975  | 0.326 | 0.158 | 3.88E-05 | H-cluster3 |
| COL5A1   | 2.24E-09 | 0.385119 | 0.557 | 0.355 | 4.19E-05 | H-cluster3 |
| SPTAN11  | 2.32E-09 | 0.355697 | 0.595 | 0.392 | 4.34E-05 | H-cluster3 |
| IQGAP1   | 2.53E-09 | 0.321167 | 0.67  | 0.463 | 4.73E-05 | H-cluster3 |
| KLF6     | 2.59E-09 | 0.39899  | 0.348 | 0.179 | 4.85E-05 | H-cluster3 |

|          |          |          |       |       |          |            |
|----------|----------|----------|-------|-------|----------|------------|
| SLCO5A1  | 2.60E-09 | 0.286875 | 0.458 | 0.254 | 4.86E-05 | H-cluster3 |
| PTP4A2   | 3.76E-09 | 0.358186 | 0.432 | 0.247 | 7.04E-05 | H-cluster3 |
| RYBP     | 3.79E-09 | 0.485541 | 0.303 | 0.147 | 7.09E-05 | H-cluster3 |
| PABPC1   | 4.19E-09 | 0.379817 | 0.534 | 0.33  | 7.84E-05 | H-cluster3 |
| FAT1     | 4.31E-09 | 0.332023 | 0.292 | 0.138 | 8.07E-05 | H-cluster3 |
| IPO7     | 4.33E-09 | 0.350007 | 0.36  | 0.188 | 8.10E-05 | H-cluster3 |
| NFIX     | 4.64E-09 | 0.283739 | 0.564 | 0.365 | 8.68E-05 | H-cluster3 |
| SON      | 4.75E-09 | 0.2852   | 0.663 | 0.469 | 8.88E-05 | H-cluster3 |
| NUPR1    | 4.82E-09 | 0.280091 | 0.303 | 0.142 | 9.01E-05 | H-cluster3 |
| ATP2A2   | 4.90E-09 | 0.320269 | 0.455 | 0.255 | 9.17E-05 | H-cluster3 |
| RHOQ     | 5.21E-09 | 0.318233 | 0.443 | 0.248 | 9.74E-05 | H-cluster3 |
| ACTR3    | 5.84E-09 | 0.294862 | 0.424 | 0.234 | 0.000109 | H-cluster3 |
| CORO1C1  | 8.18E-09 | 0.276668 | 0.371 | 0.193 | 0.000153 | H-cluster3 |
| SF1      | 8.39E-09 | 0.285322 | 0.538 | 0.333 | 0.000157 | H-cluster3 |
| CYTH1    | 8.76E-09 | 0.34501  | 0.417 | 0.229 | 0.000164 | H-cluster3 |
| SRSF2    | 9.20E-09 | 0.376564 | 0.432 | 0.257 | 0.000172 | H-cluster3 |
| MSN      | 9.40E-09 | 0.3035   | 0.413 | 0.226 | 0.000176 | H-cluster3 |
| TMOD1    | 1.06E-08 | 0.296486 | 0.273 | 0.126 | 0.000198 | H-cluster3 |
| PXDNL1   | 1.07E-08 | 0.312692 | 0.47  | 0.271 | 0.0002   | H-cluster3 |
| TWIST2   | 1.12E-08 | 0.427448 | 0.519 | 0.325 | 0.000209 | H-cluster3 |
| MRC2     | 1.26E-08 | 0.364937 | 0.648 | 0.46  | 0.000235 | H-cluster3 |
| EIF3J    | 1.36E-08 | 0.26587  | 0.307 | 0.148 | 0.000255 | H-cluster3 |
| MYO1E1   | 1.63E-08 | 0.262943 | 0.462 | 0.265 | 0.000305 | H-cluster3 |
| GPX31    | 1.72E-08 | 0.253519 | 0.538 | 0.33  | 0.000321 | H-cluster3 |
| PHF20    | 1.92E-08 | 0.433143 | 0.451 | 0.273 | 0.00036  | H-cluster3 |
| INTS6    | 1.98E-08 | 0.434483 | 0.462 | 0.281 | 0.00037  | H-cluster3 |
| AGAP11   | 1.98E-08 | 0.336759 | 0.773 | 0.56  | 0.00037  | H-cluster3 |
| PXN1     | 2.04E-08 | 0.322828 | 0.492 | 0.294 | 0.000381 | H-cluster3 |
| MARCH3   | 2.10E-08 | 0.404796 | 0.549 | 0.34  | 0.000393 | H-cluster3 |
| TNFAIP2  | 2.38E-08 | 0.550321 | 0.447 | 0.26  | 0.000444 | H-cluster3 |
| SULF11   | 2.39E-08 | 0.341965 | 0.633 | 0.42  | 0.000448 | H-cluster3 |
| ITGAV    | 2.68E-08 | 0.347706 | 0.5   | 0.294 | 0.000501 | H-cluster3 |
| SPPL2A   | 2.84E-08 | 0.337888 | 0.47  | 0.281 | 0.00053  | H-cluster3 |
| HNRNPH3  | 2.84E-08 | 0.260558 | 0.504 | 0.304 | 0.000532 | H-cluster3 |
| UBE2B    | 2.88E-08 | 0.318974 | 0.489 | 0.301 | 0.000539 | H-cluster3 |
| MT-ND2   | 2.90E-08 | 0.261888 | 0.898 | 0.812 | 0.000542 | H-cluster3 |
| ADAMTS61 | 3.12E-08 | 0.381599 | 0.367 | 0.197 | 0.000583 | H-cluster3 |
| PCF11    | 3.22E-08 | 0.304266 | 0.417 | 0.243 | 0.000603 | H-cluster3 |
| VCL      | 3.42E-08 | 0.472899 | 0.53  | 0.337 | 0.000639 | H-cluster3 |
| ABCC11   | 3.42E-08 | 0.353847 | 0.561 | 0.362 | 0.00064  | H-cluster3 |
| SLC4A7   | 3.49E-08 | 0.847553 | 0.527 | 0.359 | 0.000653 | H-cluster3 |
| RAC1     | 5.10E-08 | 0.304149 | 0.367 | 0.205 | 0.000955 | H-cluster3 |
| PPP2CB   | 5.36E-08 | 0.285285 | 0.409 | 0.229 | 0.001002 | H-cluster3 |
| RIPK1    | 6.86E-08 | 0.298957 | 0.333 | 0.178 | 0.001283 | H-cluster3 |
| SUB1     | 6.95E-08 | 0.272948 | 0.33  | 0.174 | 0.001299 | H-cluster3 |
| TXNIP    | 7.42E-08 | 0.680222 | 0.587 | 0.461 | 0.001388 | H-cluster3 |
| ERRFI1   | 7.47E-08 | 0.30831  | 0.386 | 0.214 | 0.001398 | H-cluster3 |

|          |          |          |       |       |          |            |
|----------|----------|----------|-------|-------|----------|------------|
| EMP1     | 8.11E-08 | 0.497355 | 0.485 | 0.314 | 0.001517 | H-cluster3 |
| GRB10    | 8.79E-08 | 0.399091 | 0.405 | 0.24  | 0.001644 | H-cluster3 |
| PMP22    | 9.21E-08 | 0.299075 | 0.53  | 0.362 | 0.001722 | H-cluster3 |
| A4GALT   | 9.35E-08 | 0.255182 | 0.277 | 0.133 | 0.001748 | H-cluster3 |
| HSPD1    | 1.00E-07 | 0.375249 | 0.261 | 0.127 | 0.001873 | H-cluster3 |
| RFX2     | 1.00E-07 | 0.486977 | 0.458 | 0.294 | 0.001874 | H-cluster3 |
| CLIP1    | 1.01E-07 | 0.574769 | 0.648 | 0.461 | 0.001886 | H-cluster3 |
| DRAM1    | 1.17E-07 | 0.342802 | 0.394 | 0.216 | 0.002184 | H-cluster3 |
| PCSK5    | 1.27E-07 | 0.405317 | 0.553 | 0.377 | 0.002377 | H-cluster3 |
| IL6ST1   | 1.32E-07 | 0.314273 | 0.667 | 0.516 | 0.002461 | H-cluster3 |
| L3MBTL41 | 1.33E-07 | 0.304863 | 0.326 | 0.173 | 0.002482 | H-cluster3 |
| TRIO1    | 1.36E-07 | 0.268733 | 0.837 | 0.689 | 0.002545 | H-cluster3 |
| GNB1     | 1.50E-07 | 0.454823 | 0.621 | 0.432 | 0.002808 | H-cluster3 |
| RUNX11   | 1.63E-07 | 0.369712 | 0.542 | 0.361 | 0.003051 | H-cluster3 |
| CMIP1    | 1.71E-07 | 0.338196 | 0.439 | 0.267 | 0.003202 | H-cluster3 |
| FLNB1    | 2.54E-07 | 0.356995 | 0.39  | 0.224 | 0.004754 | H-cluster3 |
| PTGIS1   | 2.69E-07 | 0.343366 | 0.667 | 0.49  | 0.005038 | H-cluster3 |
| GATAD2A  | 2.82E-07 | 0.326555 | 0.364 | 0.204 | 0.005278 | H-cluster3 |
| TJP1     | 3.34E-07 | 0.260188 | 0.371 | 0.206 | 0.006255 | H-cluster3 |
| MYO9B    | 3.78E-07 | 0.316268 | 0.466 | 0.289 | 0.007072 | H-cluster3 |
| MTHFD1L1 | 4.81E-07 | 0.349425 | 0.307 | 0.166 | 0.009005 | H-cluster3 |
| PHLDB1   | 4.89E-07 | 0.375655 | 0.572 | 0.395 | 0.009144 | H-cluster3 |
| ZFP36L1  | 4.89E-07 | 0.305408 | 0.511 | 0.331 | 0.009155 | H-cluster3 |
| GALNT121 | 5.19E-07 | 0.275844 | 0.265 | 0.134 | 0.009714 | H-cluster3 |
| ANXA11   | 5.63E-07 | 0.261624 | 0.364 | 0.214 | 0.010527 | H-cluster3 |
| CORO2B1  | 6.39E-07 | 0.383552 | 0.413 | 0.25  | 0.011946 | H-cluster3 |
| GPCPD1   | 7.15E-07 | 0.377557 | 0.436 | 0.279 | 0.013368 | H-cluster3 |
| PRKCA    | 7.25E-07 | 0.323297 | 0.511 | 0.337 | 0.013553 | H-cluster3 |
| WISP2    | 7.26E-07 | 0.523856 | 0.383 | 0.248 | 0.013573 | H-cluster3 |
| PRKAR2A  | 7.30E-07 | 0.333099 | 0.409 | 0.245 | 0.013654 | H-cluster3 |
| GNAI3    | 8.02E-07 | 0.359155 | 0.402 | 0.246 | 0.014994 | H-cluster3 |
| CDK17    | 9.01E-07 | 0.34701  | 0.439 | 0.277 | 0.016849 | H-cluster3 |
| RRAS21   | 9.93E-07 | 0.293118 | 0.409 | 0.245 | 0.018564 | H-cluster3 |
| WTAP     | 1.09E-06 | 0.343268 | 0.451 | 0.285 | 0.020342 | H-cluster3 |
| MT-ATP8  | 1.16E-06 | 0.288543 | 0.47  | 0.299 | 0.02177  | H-cluster3 |
| EFEMP1   | 1.30E-06 | 0.318845 | 0.545 | 0.391 | 0.024371 | H-cluster3 |
| AGAP3    | 1.44E-06 | 0.257647 | 0.261 | 0.137 | 0.026869 | H-cluster3 |
| PFKFB3   | 1.59E-06 | 0.324096 | 0.311 | 0.171 | 0.029656 | H-cluster3 |
| CD341    | 1.86E-06 | 0.280575 | 0.576 | 0.422 | 0.034871 | H-cluster3 |
| MAPK6    | 1.99E-06 | 0.278316 | 0.39  | 0.235 | 0.03713  | H-cluster3 |
| STX12    | 2.10E-06 | 0.26479  | 0.485 | 0.321 | 0.039294 | H-cluster3 |
| CYBRD1   | 2.12E-06 | 0.273867 | 0.572 | 0.412 | 0.039586 | H-cluster3 |
| SOAT1    | 2.25E-06 | 0.255359 | 0.295 | 0.161 | 0.042168 | H-cluster3 |
| USP12    | 2.67E-06 | 0.502335 | 0.462 | 0.31  | 0.050015 | H-cluster3 |
| PHLPP11  | 3.20E-06 | 0.260825 | 0.576 | 0.398 | 0.059812 | H-cluster3 |
| SORBS21  | 3.29E-06 | 0.369542 | 0.311 | 0.183 | 0.061606 | H-cluster3 |
| KIAA0232 | 4.27E-06 | 0.364594 | 0.432 | 0.279 | 0.079779 | H-cluster3 |

|          |          |          |       |       |          |            |
|----------|----------|----------|-------|-------|----------|------------|
| BAZ1A    | 5.26E-06 | 0.352849 | 0.375 | 0.229 | 0.098464 | H-cluster3 |
| EPB41L31 | 6.10E-06 | 0.337358 | 0.644 | 0.485 | 0.114071 | H-cluster3 |
| ABR      | 8.07E-06 | 0.438484 | 0.462 | 0.316 | 0.150981 | H-cluster3 |
| DENND5A  | 8.18E-06 | 0.450594 | 0.515 | 0.366 | 0.152999 | H-cluster3 |
| GRK51    | 9.19E-06 | 0.346393 | 0.731 | 0.596 | 0.171922 | H-cluster3 |
| DISC1    | 9.31E-06 | 0.267486 | 0.288 | 0.165 | 0.174045 | H-cluster3 |
| GLUD1    | 1.04E-05 | 0.303968 | 0.39  | 0.25  | 0.193994 | H-cluster3 |
| BACH11   | 1.05E-05 | 0.320046 | 0.413 | 0.267 | 0.196248 | H-cluster3 |
| NFKB1    | 1.16E-05 | 1.251842 | 0.47  | 0.327 | 0.216965 | H-cluster3 |
| HIVEP2   | 1.25E-05 | 0.414261 | 0.58  | 0.424 | 0.233747 | H-cluster3 |
| RBMS11   | 1.38E-05 | 0.283672 | 0.837 | 0.702 | 0.258583 | H-cluster3 |
| ABL2     | 1.44E-05 | 0.592927 | 0.481 | 0.342 | 0.269727 | H-cluster3 |
| PRSS231  | 1.96E-05 | 0.272797 | 0.455 | 0.303 | 0.367297 | H-cluster3 |
| PAPSS2   | 2.42E-05 | 0.292289 | 0.345 | 0.216 | 0.451891 | H-cluster3 |
| PSEN1    | 3.31E-05 | 0.263178 | 0.458 | 0.313 | 0.618515 | H-cluster3 |
| IFRD1    | 3.42E-05 | 0.344456 | 0.326 | 0.205 | 0.639863 | H-cluster3 |
| CBLB     | 3.68E-05 | 0.350032 | 0.886 | 0.795 | 0.687398 | H-cluster3 |
| RAB8B    | 4.77E-05 | 0.257563 | 0.424 | 0.275 | 0.893053 | H-cluster3 |
| MARK1    | 6.40E-05 | 0.291781 | 0.394 | 0.255 | 1        | H-cluster3 |
| LHFPL2   | 7.16E-05 | 0.261731 | 0.322 | 0.198 | 1        | H-cluster3 |
| ATP2B11  | 8.04E-05 | 0.328305 | 0.447 | 0.302 | 1        | H-cluster3 |
| MAP3K8   | 9.21E-05 | 0.307738 | 0.371 | 0.252 | 1        | H-cluster3 |
| ADAM17   | 0.000102 | 0.415413 | 0.443 | 0.309 | 1        | H-cluster3 |
| ARL13B   | 0.000117 | 0.292208 | 0.261 | 0.158 | 1        | H-cluster3 |
| AKAP12   | 0.000127 | 0.308341 | 0.572 | 0.42  | 1        | H-cluster3 |
| ELL2     | 0.000146 | 0.564879 | 0.261 | 0.165 | 1        | H-cluster3 |
| LATS2    | 0.00015  | 0.273707 | 0.398 | 0.27  | 1        | H-cluster3 |
| BICD11   | 0.000168 | 0.293508 | 0.386 | 0.255 | 1        | H-cluster3 |
| C31      | 0.000174 | 0.417606 | 0.519 | 0.416 | 1        | H-cluster3 |
| CSNK1A1  | 0.000182 | 0.274392 | 0.64  | 0.489 | 1        | H-cluster3 |
| ULK1     | 0.000197 | 0.257526 | 0.292 | 0.185 | 1        | H-cluster3 |
| TRAF3    | 0.000216 | 0.272967 | 0.333 | 0.221 | 1        | H-cluster3 |
| PAPD7    | 0.000352 | 0.250503 | 0.269 | 0.165 | 1        | H-cluster3 |
| EML4     | 0.000474 | 0.266721 | 0.402 | 0.276 | 1        | H-cluster3 |
| SLC16A7  | 0.000476 | 0.315714 | 0.515 | 0.363 | 1        | H-cluster3 |
| KCTD20   | 0.000487 | 0.289125 | 0.288 | 0.185 | 1        | H-cluster3 |
| HNRNPU   | 0.000567 | 0.275929 | 0.617 | 0.496 | 1        | H-cluster3 |
| MCU      | 0.001028 | 0.252677 | 0.42  | 0.303 | 1        | H-cluster3 |
| GBE1     | 0.001484 | 0.289874 | 0.53  | 0.402 | 1        | H-cluster3 |
| LRRFIP1  | 0.002414 | 0.278551 | 0.273 | 0.187 | 1        | H-cluster3 |
| WWTR1    | 0.00248  | 0.261976 | 0.477 | 0.361 | 1        | H-cluster3 |
| EIF2AK3  | 0.002989 | 0.254336 | 0.269 | 0.186 | 1        | H-cluster3 |
| PHLDB21  | 0.003282 | 0.302629 | 0.576 | 0.461 | 1        | H-cluster3 |
| SAMD4A   | 0.007556 | 0.438093 | 0.636 | 0.536 | 1        | H-cluster3 |

### Extended Data Table 5

Pearson coefficient correlation of male subjects between RSPO2 (ng/ml) in plasma and following parameters

[illegible]

**Continued**

[illegible]

### Extended Data Table 6

Pearson coefficient correlation of female subjects between RSPO2 (ng/ml) in plasma and following parameters

[illegible]



**Continued**

[illegible]

| Extened Data Table 7:maker genes for each cluster idenfied in 10x snRNA seq of ingWAT<br>CAG-GFP and CAG-RSPO2 AAV infection HFD mice |       |         |       |       |           |            |
|---------------------------------------------------------------------------------------------------------------------------------------|-------|---------|-------|-------|-----------|------------|
| gene                                                                                                                                  | p val | avg log | pct.1 | pct.2 | p val adj | cluster    |
| Sorbs1                                                                                                                                | 0     | 5.365   | 1.000 | 0.197 | 0         | Adipocytes |
| Acs1                                                                                                                                  | 0     | 5.302   | 0.995 | 0.114 | 0         | Adipocytes |
| Npr3                                                                                                                                  | 0     | 4.909   | 0.995 | 0.084 | 0         | Adipocytes |
| Ghr                                                                                                                                   | 0     | 4.879   | 1.000 | 0.6   | 0         | Adipocytes |
| Car3                                                                                                                                  | 0     | 4.739   | 0.973 | 0.056 | 0         | Adipocytes |
| Tenm4                                                                                                                                 | 0     | 4.718   | 1.000 | 0.329 | 0         | Adipocytes |
| Prkar2b                                                                                                                               | 0     | 4.711   | 0.999 | 0.174 | 0         | Adipocytes |
| Cidec                                                                                                                                 | 0     | 4.212   | 0.994 | 0.064 | 0         | Adipocytes |
| Lpgat1                                                                                                                                | 0     | 4.129   | 0.995 | 0.251 | 0         | Adipocytes |
| Tshr                                                                                                                                  | 0     | 4.123   | 0.981 | 0.085 | 0         | Adipocytes |
| Mageb18                                                                                                                               | 0     | 4.060   | 0.721 | 0.084 | 0         | Adipocytes |
| Gm42906                                                                                                                               | 0     | 4.007   | 0.921 | 0.08  | 0         | Adipocytes |
| Tmem45b                                                                                                                               | 0     | 3.943   | 0.941 | 0.1   | 0         | Adipocytes |
| Mpp7                                                                                                                                  | 0     | 3.839   | 0.988 | 0.203 | 0         | Adipocytes |
| Sntb1                                                                                                                                 | 0     | 3.815   | 0.995 | 0.109 | 0         | Adipocytes |
| Hacd2                                                                                                                                 | 0     | 3.774   | 0.992 | 0.187 | 0         | Adipocytes |
| Mmd                                                                                                                                   | 0     | 3.774   | 0.985 | 0.093 | 0         | Adipocytes |
| Ankef1                                                                                                                                | 0     | 3.716   | 0.991 | 0.059 | 0         | Adipocytes |
| Fabp4                                                                                                                                 | 0     | 3.713   | 0.997 | 0.396 | 0         | Adipocytes |
| Nnat                                                                                                                                  | 0     | 3.667   | 0.839 | 0.121 | 0         | Adipocytes |
| Cav1                                                                                                                                  | 0     | 3.579   | 0.985 | 0.094 | 0         | Adipocytes |
| Chpt1                                                                                                                                 | 0     | 3.516   | 0.978 | 0.124 | 0         | Adipocytes |
| Fry                                                                                                                                   | 0     | 3.515   | 1.000 | 0.427 | 0         | Adipocytes |
| Pnpla3                                                                                                                                | 0     | 3.481   | 0.952 | 0.057 | 0         | Adipocytes |
| Plin4                                                                                                                                 | 0     | 3.440   | 0.985 | 0.063 | 0         | Adipocytes |
| Prr16                                                                                                                                 | 0     | 3.382   | 0.978 | 0.308 | 0         | Adipocytes |
| Nrg4                                                                                                                                  | 0     | 3.365   | 0.974 | 0.084 | 0         | Adipocytes |
| Slc1a5                                                                                                                                | 0     | 3.337   | 0.997 | 0.411 | 0         | Adipocytes |
| Adipor2                                                                                                                               | 0     | 3.306   | 0.984 | 0.293 | 0         | Adipocytes |
| Sik2                                                                                                                                  | 0     | 3.303   | 0.998 | 0.572 | 0         | Adipocytes |
| Pcx                                                                                                                                   | 0     | 3.223   | 0.962 | 0.05  | 0         | Adipocytes |
| Smoc1                                                                                                                                 | 0     | 3.222   | 0.952 | 0.076 | 0         | Adipocytes |
| Pparg                                                                                                                                 | 0     | 3.208   | 0.997 | 0.533 | 0         | Adipocytes |
| Tmem135                                                                                                                               | 0     | 3.142   | 0.993 | 0.546 | 0         | Adipocytes |
| Sgcd                                                                                                                                  | 0     | 3.108   | 0.998 | 0.552 | 0         | Adipocytes |
| Bckdhb                                                                                                                                | 0     | 3.075   | 0.999 | 0.475 | 0         | Adipocytes |
| Tspan12                                                                                                                               | 0     | 3.066   | 0.968 | 0.128 | 0         | Adipocytes |
| Dgat2                                                                                                                                 | 0     | 3.056   | 0.933 | 0.041 | 0         | Adipocytes |
| Plin1                                                                                                                                 | 0     | 3.052   | 0.977 | 0.063 | 0         | Adipocytes |
| Pde3b                                                                                                                                 | 0     | 3.033   | 0.998 | 0.514 | 0         | Adipocytes |
| Fam126b                                                                                                                               | 0     | 3.011   | 0.979 | 0.249 | 0         | Adipocytes |
| Lipe                                                                                                                                  | 0     | 2.947   | 0.982 | 0.087 | 0         | Adipocytes |
| Eepd1                                                                                                                                 | 0     | 2.938   | 0.929 | 0.29  | 0         | Adipocytes |
| Fgf14                                                                                                                                 | 0     | 2.925   | 0.534 | 0.077 | 0         | Adipocytes |
| Me1                                                                                                                                   | 0     | 2.924   | 0.893 | 0.154 | 0         | Adipocytes |
| Atp1a2                                                                                                                                | 0     | 2.897   | 0.963 | 0.066 | 0         | Adipocytes |
| Myl1                                                                                                                                  | 0     | 2.882   | 0.960 | 0.088 | 0         | Adipocytes |
| Art3                                                                                                                                  | 0     | 2.878   | 0.935 | 0.081 | 0         | Adipocytes |
| Prkd1                                                                                                                                 | 0     | 2.865   | 0.999 | 0.52  | 0         | Adipocytes |
| Acox1                                                                                                                                 | 0     | 2.865   | 0.979 | 0.291 | 0         | Adipocytes |
| Mycbp2                                                                                                                                | 0     | 2.842   | 0.999 | 0.831 | 0         | Adipocytes |
| Fam13a                                                                                                                                | 0     | 2.751   | 0.876 | 0.298 | 0         | Adipocytes |
| Acvr1c                                                                                                                                | 0     | 2.748   | 0.921 | 0.056 | 0         | Adipocytes |
| Ryr2                                                                                                                                  | 0     | 2.725   | 0.877 | 0.091 | 0         | Adipocytes |
| Ralgapa2                                                                                                                              | 0     | 2.719   | 0.996 | 0.558 | 0         | Adipocytes |
| Slc24a3                                                                                                                               | 0     | 2.705   | 0.991 | 0.536 | 0         | Adipocytes |
| Gnai1                                                                                                                                 | 0     | 2.703   | 0.923 | 0.087 | 0         | Adipocytes |
| Pdzr3                                                                                                                                 | 0     | 2.682   | 0.983 | 0.366 | 0         | Adipocytes |

|              |   |       |       |       |   |            |
|--------------|---|-------|-------|-------|---|------------|
| Mgl1         | 0 | 2.636 | 0.974 | 0.371 | 0 | Adipocytes |
| Grb14        | 0 | 2.617 | 0.884 | 0.229 | 0 | Adipocytes |
| Fmr1         | 0 | 2.615 | 0.867 | 0.282 | 0 | Adipocytes |
| Slc1a3       | 0 | 2.600 | 0.886 | 0.172 | 0 | Adipocytes |
| Palmd        | 0 | 2.592 | 0.943 | 0.057 | 0 | Adipocytes |
| Pde4d        | 0 | 2.585 | 0.995 | 0.591 | 0 | Adipocytes |
| Plcb1        | 0 | 2.583 | 0.998 | 0.52  | 0 | Adipocytes |
| Rgs7         | 0 | 2.582 | 0.847 | 0.302 | 0 | Adipocytes |
| Slc7a10      | 0 | 2.560 | 0.919 | 0.051 | 0 | Adipocytes |
| Rgcc         | 0 | 2.534 | 0.947 | 0.058 | 0 | Adipocytes |
| Apol6        | 0 | 2.519 | 0.934 | 0.047 | 0 | Adipocytes |
| Dram1        | 0 | 2.512 | 0.942 | 0.153 | 0 | Adipocytes |
| Adam12       | 0 | 2.508 | 0.955 | 0.467 | 0 | Adipocytes |
| Lep          | 0 | 2.477 | 0.897 | 0.036 | 0 | Adipocytes |
| Trhde        | 0 | 2.469 | 0.806 | 0.124 | 0 | Adipocytes |
| Sox6         | 0 | 2.455 | 0.928 | 0.11  | 0 | Adipocytes |
| Fgf10        | 0 | 2.451 | 0.894 | 0.287 | 0 | Adipocytes |
| Enpp2        | 0 | 2.442 | 0.916 | 0.256 | 0 | Adipocytes |
| Lhfp12       | 0 | 2.421 | 0.910 | 0.394 | 0 | Adipocytes |
| Cat          | 0 | 2.398 | 0.926 | 0.169 | 0 | Adipocytes |
| Pfkfb3       | 0 | 2.387 | 0.932 | 0.355 | 0 | Adipocytes |
| Bcar3        | 0 | 2.370 | 0.951 | 0.346 | 0 | Adipocytes |
| Rasgrf2      | 0 | 2.349 | 0.897 | 0.115 | 0 | Adipocytes |
| Kcnc2        | 0 | 2.322 | 0.669 | 0.245 | 0 | Adipocytes |
| Ptchd4       | 0 | 2.312 | 0.708 | 0.094 | 0 | Adipocytes |
| C9orf72      | 0 | 2.301 | 0.923 | 0.209 | 0 | Adipocytes |
| Trabd2b      | 0 | 2.299 | 0.827 | 0.28  | 0 | Adipocytes |
| Nrip1        | 0 | 2.282 | 0.997 | 0.661 | 0 | Adipocytes |
| Tln2         | 0 | 2.243 | 0.944 | 0.391 | 0 | Adipocytes |
| Slc36a2      | 0 | 2.236 | 0.851 | 0.041 | 0 | Adipocytes |
| 4931428L18Ri | 0 | 2.228 | 0.842 | 0.06  | 0 | Adipocytes |
| Acss2        | 0 | 2.216 | 0.761 | 0.095 | 0 | Adipocytes |
| Nedd4l       | 0 | 2.216 | 0.979 | 0.649 | 0 | Adipocytes |
| Slc27a1      | 0 | 2.206 | 0.937 | 0.364 | 0 | Adipocytes |
| Epn2         | 0 | 2.200 | 0.976 | 0.487 | 0 | Adipocytes |
| Snhg11       | 0 | 2.191 | 0.881 | 0.224 | 0 | Adipocytes |
| Gm20532      | 0 | 2.190 | 0.792 | 0.041 | 0 | Adipocytes |
| Magi1        | 0 | 2.168 | 0.959 | 0.489 | 0 | Adipocytes |
| Optn         | 0 | 2.165 | 0.907 | 0.186 | 0 | Adipocytes |
| Cacna1e      | 0 | 2.155 | 0.722 | 0.118 | 0 | Adipocytes |
| Cobll1       | 0 | 2.149 | 0.930 | 0.364 | 0 | Adipocytes |
| Adcy5        | 0 | 2.145 | 0.852 | 0.167 | 0 | Adipocytes |
| Lgals12      | 0 | 2.143 | 0.891 | 0.047 | 0 | Adipocytes |
| Ptprd        | 0 | 2.130 | 0.991 | 0.533 | 0 | Adipocytes |
| Pck1         | 0 | 2.127 | 0.709 | 0.076 | 0 | Adipocytes |
| Med12l       | 0 | 2.124 | 0.871 | 0.075 | 0 | Adipocytes |
| Cd36         | 0 | 2.110 | 0.999 | 0.524 | 0 | Adipocytes |
| Tsc22d3      | 0 | 2.096 | 0.952 | 0.46  | 0 | Adipocytes |
| Cavin2       | 0 | 2.061 | 0.881 | 0.098 | 0 | Adipocytes |
| Ces1d        | 0 | 2.054 | 0.810 | 0.029 | 0 | Adipocytes |
| Zfp423       | 0 | 2.047 | 0.945 | 0.431 | 0 | Adipocytes |
| Peg3         | 0 | 2.031 | 0.753 | 0.183 | 0 | Adipocytes |
| G0s2         | 0 | 2.016 | 0.841 | 0.022 | 0 | Adipocytes |
| Hipk2        | 0 | 2.016 | 0.985 | 0.566 | 0 | Adipocytes |
| Tns1         | 0 | 2.011 | 0.994 | 0.839 | 0 | Adipocytes |
| Ywhab        | 0 | 2.008 | 0.915 | 0.277 | 0 | Adipocytes |
| Lpin1        | 0 | 2.007 | 0.911 | 0.308 | 0 | Adipocytes |
| Pfkfb1       | 0 | 2.006 | 0.874 | 0.067 | 0 | Adipocytes |
| 2810004N23Ri | 0 | 1.996 | 0.858 | 0.226 | 0 | Adipocytes |
| Txlng        | 0 | 1.994 | 0.978 | 0.589 | 0 | Adipocytes |
| Acss3        | 0 | 1.984 | 0.981 | 0.548 | 0 | Adipocytes |
| Ptger3       | 0 | 1.982 | 0.760 | 0.087 | 0 | Adipocytes |

|           |   |       |       |       |   |            |
|-----------|---|-------|-------|-------|---|------------|
| Pde7a     | 0 | 1.972 | 0.955 | 0.67  | 0 | Adipocytes |
| Dst       | 0 | 1.963 | 0.997 | 0.608 | 0 | Adipocytes |
| Mical3    | 0 | 1.950 | 0.963 | 0.397 | 0 | Adipocytes |
| Cdo1      | 0 | 1.948 | 0.755 | 0.039 | 0 | Adipocytes |
| Tmem120b  | 0 | 1.944 | 0.861 | 0.191 | 0 | Adipocytes |
| Ctdspl    | 0 | 1.917 | 0.946 | 0.463 | 0 | Adipocytes |
| Pacrg     | 0 | 1.893 | 0.881 | 0.363 | 0 | Adipocytes |
| Hmgcs1    | 0 | 1.891 | 0.810 | 0.123 | 0 | Adipocytes |
| Por       | 0 | 1.887 | 0.901 | 0.318 | 0 | Adipocytes |
| Cnnm2     | 0 | 1.879 | 0.917 | 0.554 | 0 | Adipocytes |
| Abcd2     | 0 | 1.879 | 0.915 | 0.45  | 0 | Adipocytes |
| Efna5     | 0 | 1.877 | 0.990 | 0.592 | 0 | Adipocytes |
| Sybu      | 0 | 1.867 | 0.799 | 0.044 | 0 | Adipocytes |
| Lama4     | 0 | 1.865 | 0.993 | 0.599 | 0 | Adipocytes |
| Cpeb4     | 0 | 1.856 | 0.969 | 0.534 | 0 | Adipocytes |
| Negr1     | 0 | 1.851 | 0.982 | 0.724 | 0 | Adipocytes |
| Trp53inp2 | 0 | 1.839 | 0.817 | 0.04  | 0 | Adipocytes |
| Bnip3     | 0 | 1.836 | 0.799 | 0.079 | 0 | Adipocytes |
| Ctnna3    | 0 | 1.835 | 0.610 | 0.206 | 0 | Adipocytes |
| ErbB4     | 0 | 1.832 | 0.528 | 0.085 | 0 | Adipocytes |
| Apex2     | 0 | 1.829 | 0.912 | 0.517 | 0 | Adipocytes |
| MLXIP1    | 0 | 1.823 | 0.801 | 0.053 | 0 | Adipocytes |
| Esrrg     | 0 | 1.812 | 0.678 | 0.14  | 0 | Adipocytes |
| Acyp2     | 0 | 1.803 | 0.973 | 0.623 | 0 | Adipocytes |
| Ptpm      | 0 | 1.789 | 0.997 | 0.751 | 0 | Adipocytes |
| Vwc2l     | 0 | 1.772 | 0.545 | 0.033 | 0 | Adipocytes |
| Sorbs2    | 0 | 1.768 | 0.559 | 0.088 | 0 | Adipocytes |
| Ccdc3     | 0 | 1.766 | 0.796 | 0.27  | 0 | Adipocytes |
| Aox1      | 0 | 1.760 | 0.923 | 0.403 | 0 | Adipocytes |
| Anxa2     | 0 | 1.757 | 0.941 | 0.471 | 0 | Adipocytes |
| Tmem120a  | 0 | 1.756 | 0.802 | 0.081 | 0 | Adipocytes |
| Thrb      | 0 | 1.754 | 0.992 | 0.779 | 0 | Adipocytes |
| Scd1      | 0 | 1.753 | 0.678 | 0.169 | 0 | Adipocytes |
| Col15a1   | 0 | 1.752 | 0.823 | 0.331 | 0 | Adipocytes |
| Glb1l2    | 0 | 1.751 | 0.796 | 0.037 | 0 | Adipocytes |
| Sort1     | 0 | 1.744 | 0.883 | 0.287 | 0 | Adipocytes |
| Slc22a3   | 0 | 1.744 | 0.811 | 0.026 | 0 | Adipocytes |
| Heph      | 0 | 1.743 | 0.766 | 0.042 | 0 | Adipocytes |
| Sipa1l1   | 0 | 1.730 | 0.953 | 0.517 | 0 | Adipocytes |
| Sh3pxd2a  | 0 | 1.723 | 0.885 | 0.492 | 0 | Adipocytes |
| Clybl     | 0 | 1.717 | 0.931 | 0.575 | 0 | Adipocytes |
| Cd1d1     | 0 | 1.715 | 0.773 | 0.034 | 0 | Adipocytes |
| Large1    | 0 | 1.715 | 0.992 | 0.829 | 0 | Adipocytes |
| Rnf24     | 0 | 1.692 | 0.828 | 0.244 | 0 | Adipocytes |
| Foxo1     | 0 | 1.685 | 0.972 | 0.618 | 0 | Adipocytes |
| Gpat3     | 0 | 1.680 | 0.765 | 0.05  | 0 | Adipocytes |
| lfrd1     | 0 | 1.680 | 0.907 | 0.482 | 0 | Adipocytes |
| Lpl       | 0 | 1.679 | 0.983 | 0.514 | 0 | Adipocytes |
| Dgat1     | 0 | 1.670 | 0.820 | 0.079 | 0 | Adipocytes |
| Lgr4      | 0 | 1.664 | 0.903 | 0.374 | 0 | Adipocytes |
| Plaat3    | 0 | 1.653 | 0.775 | 0.119 | 0 | Adipocytes |
| Pdzd2     | 0 | 1.641 | 0.967 | 0.467 | 0 | Adipocytes |
| Trarg1    | 0 | 1.632 | 0.804 | 0.067 | 0 | Adipocytes |
| Adrb3     | 0 | 1.631 | 0.656 | 0.05  | 0 | Adipocytes |
| Dusp10    | 0 | 1.625 | 0.765 | 0.274 | 0 | Adipocytes |
| Pkp2      | 0 | 1.616 | 0.778 | 0.226 | 0 | Adipocytes |
| Ptpkr     | 0 | 1.599 | 0.797 | 0.367 | 0 | Adipocytes |
| Shroom3   | 0 | 1.599 | 0.737 | 0.235 | 0 | Adipocytes |
| Fggy      | 0 | 1.588 | 0.894 | 0.456 | 0 | Adipocytes |
| Pmepa1    | 0 | 1.587 | 0.911 | 0.348 | 0 | Adipocytes |
| Car5b     | 0 | 1.585 | 0.758 | 0.155 | 0 | Adipocytes |
| Fam214a   | 0 | 1.583 | 0.953 | 0.686 | 0 | Adipocytes |

|          |   |       |       |       |   |            |
|----------|---|-------|-------|-------|---|------------|
| Adra1a   | 0 | 1.575 | 0.754 | 0.231 | 0 | Adipocytes |
| Larp1b   | 0 | 1.568 | 0.853 | 0.37  | 0 | Adipocytes |
| Tead1    | 0 | 1.556 | 0.972 | 0.625 | 0 | Adipocytes |
| Ephx2    | 0 | 1.555 | 0.759 | 0.051 | 0 | Adipocytes |
| Ccdc80   | 0 | 1.554 | 0.960 | 0.454 | 0 | Adipocytes |
| Arap2    | 0 | 1.550 | 0.804 | 0.174 | 0 | Adipocytes |
| Slc22a23 | 0 | 1.546 | 0.782 | 0.317 | 0 | Adipocytes |
| Aplp2    | 0 | 1.541 | 0.962 | 0.444 | 0 | Adipocytes |
| Rgs7bp   | 0 | 1.540 | 0.747 | 0.35  | 0 | Adipocytes |
| Ntm      | 0 | 1.539 | 0.634 | 0.022 | 0 | Adipocytes |
| Prelp    | 0 | 1.529 | 0.813 | 0.118 | 0 | Adipocytes |
| Msrb3    | 0 | 1.524 | 0.942 | 0.434 | 0 | Adipocytes |
| Irak2    | 0 | 1.523 | 0.895 | 0.363 | 0 | Adipocytes |
| Arhgap29 | 0 | 1.523 | 0.942 | 0.496 | 0 | Adipocytes |
| Snta1    | 0 | 1.511 | 0.842 | 0.432 | 0 | Adipocytes |
| Slc5a3   | 0 | 1.511 | 0.815 | 0.291 | 0 | Adipocytes |
| Synpo2   | 0 | 1.505 | 0.760 | 0.188 | 0 | Adipocytes |
| Acacb    | 0 | 1.498 | 0.720 | 0.131 | 0 | Adipocytes |
| Ptprg    | 0 | 1.497 | 0.989 | 0.637 | 0 | Adipocytes |
| Macrod2  | 0 | 1.494 | 0.888 | 0.465 | 0 | Adipocytes |
| Nap1l1   | 0 | 1.472 | 0.845 | 0.289 | 0 | Adipocytes |
| Dpyd     | 0 | 1.463 | 0.907 | 0.558 | 0 | Adipocytes |
| Vcl      | 0 | 1.451 | 0.930 | 0.52  | 0 | Adipocytes |
| Fhit     | 0 | 1.449 | 0.978 | 0.797 | 0 | Adipocytes |
| Prdm16   | 0 | 1.446 | 0.793 | 0.279 | 0 | Adipocytes |
| Lctl     | 0 | 1.438 | 0.640 | 0.031 | 0 | Adipocytes |
| Gbe1     | 0 | 1.436 | 0.893 | 0.522 | 0 | Adipocytes |
| Ppip5k1  | 0 | 1.416 | 0.872 | 0.474 | 0 | Adipocytes |
| Wwtr1    | 0 | 1.414 | 0.917 | 0.475 | 0 | Adipocytes |
| Fign     | 0 | 1.400 | 0.839 | 0.39  | 0 | Adipocytes |
| Ptpn14   | 0 | 1.398 | 0.788 | 0.249 | 0 | Adipocytes |
| Mme      | 0 | 1.397 | 0.832 | 0.309 | 0 | Adipocytes |
| Cgnl1    | 0 | 1.394 | 0.824 | 0.349 | 0 | Adipocytes |
| Retn     | 0 | 1.388 | 0.692 | 0.011 | 0 | Adipocytes |
| Ahcy12   | 0 | 1.388 | 0.976 | 0.582 | 0 | Adipocytes |
| Col4a1   | 0 | 1.376 | 0.947 | 0.462 | 0 | Adipocytes |
| Adamts9  | 0 | 1.366 | 0.698 | 0.163 | 0 | Adipocytes |
| Col4a2   | 0 | 1.362 | 0.918 | 0.395 | 0 | Adipocytes |
| Svep1    | 0 | 1.353 | 0.918 | 0.586 | 0 | Adipocytes |
| Ntrk2    | 0 | 1.340 | 0.825 | 0.362 | 0 | Adipocytes |
| Gprn3    | 0 | 1.335 | 0.577 | 0.054 | 0 | Adipocytes |
| Rad18    | 0 | 1.335 | 0.805 | 0.424 | 0 | Adipocytes |
| Slc16a10 | 0 | 1.334 | 0.936 | 0.541 | 0 | Adipocytes |
| Itga7    | 0 | 1.323 | 0.710 | 0.019 | 0 | Adipocytes |
| Xkr4     | 0 | 1.305 | 0.776 | 0.428 | 0 | Adipocytes |
| Dmd      | 0 | 1.303 | 0.851 | 0.501 | 0 | Adipocytes |
| Fgf13    | 0 | 1.299 | 0.784 | 0.373 | 0 | Adipocytes |
| Hk2      | 0 | 1.291 | 0.733 | 0.114 | 0 | Adipocytes |
| Lrrc4c   | 0 | 1.290 | 0.510 | 0.097 | 0 | Adipocytes |
| Dlg2     | 0 | 1.285 | 0.750 | 0.418 | 0 | Adipocytes |
| Plxna2   | 0 | 1.275 | 0.816 | 0.493 | 0 | Adipocytes |
| Acer2    | 0 | 1.268 | 0.683 | 0.123 | 0 | Adipocytes |
| Aoc3     | 0 | 1.267 | 0.716 | 0.032 | 0 | Adipocytes |
| Bcap31   | 0 | 1.262 | 0.796 | 0.228 | 0 | Adipocytes |
| Slc16a12 | 0 | 1.262 | 0.641 | 0.06  | 0 | Adipocytes |
| Itga6    | 0 | 1.257 | 0.678 | 0.208 | 0 | Adipocytes |
| Ephb2    | 0 | 1.248 | 0.733 | 0.273 | 0 | Adipocytes |
| Cachd1   | 0 | 1.247 | 0.881 | 0.518 | 0 | Adipocytes |
| Tspan18  | 0 | 1.240 | 0.731 | 0.27  | 0 | Adipocytes |
| Cecr2    | 0 | 1.240 | 0.656 | 0.107 | 0 | Adipocytes |
| Aldh1a7  | 0 | 1.238 | 0.569 | 0.013 | 0 | Adipocytes |
| El12     | 0 | 1.227 | 0.890 | 0.533 | 0 | Adipocytes |

|              |   |       |       |       |   |            |
|--------------|---|-------|-------|-------|---|------------|
| Zbtb7c       | 0 | 1.223 | 0.831 | 0.446 | 0 | Adipocytes |
| Fzd4         | 0 | 1.221 | 0.753 | 0.149 | 0 | Adipocytes |
| Ccdc85a      | 0 | 1.218 | 0.561 | 0.197 | 0 | Adipocytes |
| Jazf1        | 0 | 1.212 | 0.818 | 0.468 | 0 | Adipocytes |
| Aldh6a1      | 0 | 1.211 | 0.692 | 0.1   | 0 | Adipocytes |
| Clmn         | 0 | 1.207 | 0.709 | 0.248 | 0 | Adipocytes |
| Ppp1r9a      | 0 | 1.197 | 0.895 | 0.659 | 0 | Adipocytes |
| Angptl4      | 0 | 1.197 | 0.768 | 0.185 | 0 | Adipocytes |
| Jph1         | 0 | 1.190 | 0.689 | 0.269 | 0 | Adipocytes |
| Fads3        | 0 | 1.182 | 0.687 | 0.033 | 0 | Adipocytes |
| Adipoq       | 0 | 1.181 | 0.640 | 0.004 | 0 | Adipocytes |
| Bche         | 0 | 1.180 | 0.627 | 0.02  | 0 | Adipocytes |
| Mcam         | 0 | 1.177 | 0.660 | 0.021 | 0 | Adipocytes |
| Fam241a      | 0 | 1.171 | 0.715 | 0.187 | 0 | Adipocytes |
| Mest         | 0 | 1.171 | 0.484 | 0.001 | 0 | Adipocytes |
| Slc2a13      | 0 | 1.158 | 0.800 | 0.431 | 0 | Adipocytes |
| Gpd1         | 0 | 1.157 | 0.635 | 0.017 | 0 | Adipocytes |
| Fgf1         | 0 | 1.153 | 0.635 | 0.206 | 0 | Adipocytes |
| March3       | 0 | 1.153 | 0.968 | 0.82  | 0 | Adipocytes |
| Prxl2a       | 0 | 1.152 | 0.687 | 0.033 | 0 | Adipocytes |
| Tcaf1        | 0 | 1.152 | 0.779 | 0.392 | 0 | Adipocytes |
| Grid1        | 0 | 1.150 | 0.489 | 0.043 | 0 | Adipocytes |
| A530016L24Ri | 0 | 1.148 | 0.624 | 0.017 | 0 | Adipocytes |
| Mgst1        | 0 | 1.145 | 0.752 | 0.171 | 0 | Adipocytes |
| Dbi          | 0 | 1.139 | 0.637 | 0.13  | 0 | Adipocytes |
| Vegfa        | 0 | 1.139 | 0.755 | 0.206 | 0 | Adipocytes |
| Poln         | 0 | 1.135 | 0.649 | 0.241 | 0 | Adipocytes |
| Asph         | 0 | 1.130 | 0.957 | 0.733 | 0 | Adipocytes |
| Nr3c2        | 0 | 1.129 | 0.887 | 0.66  | 0 | Adipocytes |
| Irs1         | 0 | 1.109 | 0.857 | 0.404 | 0 | Adipocytes |
| Bcl2         | 0 | 1.108 | 0.890 | 0.586 | 0 | Adipocytes |
| Kcns3        | 0 | 1.104 | 0.643 | 0.05  | 0 | Adipocytes |
| B3gal2       | 0 | 1.103 | 0.645 | 0.102 | 0 | Adipocytes |
| Tmem182      | 0 | 1.102 | 0.632 | 0.013 | 0 | Adipocytes |
| Mmp28        | 0 | 1.095 | 0.596 | 0.064 | 0 | Adipocytes |
| Adhfe1       | 0 | 1.095 | 0.678 | 0.339 | 0 | Adipocytes |
| Gm42892      | 0 | 1.085 | 0.621 | 0.053 | 0 | Adipocytes |
| Noct         | 0 | 1.084 | 0.806 | 0.391 | 0 | Adipocytes |
| Sycp3        | 0 | 1.083 | 0.589 | 0.086 | 0 | Adipocytes |
| Pag1         | 0 | 1.077 | 0.758 | 0.393 | 0 | Adipocytes |
| Mrap         | 0 | 1.071 | 0.640 | 0.015 | 0 | Adipocytes |
| Gpc4         | 0 | 1.059 | 0.670 | 0.283 | 0 | Adipocytes |
| Itpr1        | 0 | 1.045 | 0.920 | 0.564 | 0 | Adipocytes |
| Cd59a        | 0 | 1.043 | 0.617 | 0.029 | 0 | Adipocytes |
| Unc79        | 0 | 1.039 | 0.552 | 0.054 | 0 | Adipocytes |
| Igf1         | 0 | 1.030 | 0.905 | 0.562 | 0 | Adipocytes |
| Chd7         | 0 | 1.029 | 0.796 | 0.333 | 0 | Adipocytes |
| Xkr6         | 0 | 1.028 | 0.644 | 0.316 | 0 | Adipocytes |
| Mpc1         | 0 | 1.022 | 0.780 | 0.332 | 0 | Adipocytes |
| Ighm         | 0 | 1.015 | 0.607 | 0.18  | 0 | Adipocytes |
| Pik3cb       | 0 | 0.994 | 0.778 | 0.294 | 0 | Adipocytes |
| A830018L16Ri | 0 | 0.993 | 0.553 | 0.041 | 0 | Adipocytes |
| 9330159F19Ri | 0 | 0.985 | 0.623 | 0.092 | 0 | Adipocytes |
| Myo1d        | 0 | 0.983 | 0.699 | 0.348 | 0 | Adipocytes |
| Syne1        | 0 | 0.981 | 0.926 | 0.669 | 0 | Adipocytes |
| Fhod3        | 0 | 0.974 | 0.594 | 0.105 | 0 | Adipocytes |
| Klb          | 0 | 0.952 | 0.559 | 0.02  | 0 | Adipocytes |
| Palld        | 0 | 0.943 | 0.829 | 0.524 | 0 | Adipocytes |
| Reep5        | 0 | 0.929 | 0.717 | 0.259 | 0 | Adipocytes |
| Gk           | 0 | 0.928 | 0.596 | 0.269 | 0 | Adipocytes |
| Serpine1     | 0 | 0.928 | 0.467 | 0.096 | 0 | Adipocytes |
| Pde7b        | 0 | 0.926 | 0.957 | 0.762 | 0 | Adipocytes |

|              |           |       |       |       |           |            |
|--------------|-----------|-------|-------|-------|-----------|------------|
| Cavin1       | 0         | 0.922 | 0.685 | 0.166 | 0         | Adipocytes |
| Stox2        | 0         | 0.922 | 0.769 | 0.409 | 0         | Adipocytes |
| Hebp1        | 0         | 0.917 | 0.623 | 0.163 | 0         | Adipocytes |
| Tes          | 0         | 0.905 | 0.677 | 0.263 | 0         | Adipocytes |
| Ctcf1        | 0         | 0.901 | 0.597 | 0.053 | 0         | Adipocytes |
| Tbc1d4       | 0         | 0.894 | 0.941 | 0.736 | 0         | Adipocytes |
| Scn8a        | 0         | 0.890 | 0.540 | 0.21  | 0         | Adipocytes |
| Mylk         | 0         | 0.888 | 0.513 | 0.084 | 0         | Adipocytes |
| Exd1         | 0         | 0.884 | 0.587 | 0.19  | 0         | Adipocytes |
| Slc5a7       | 0         | 0.873 | 0.401 | 0.001 | 0         | Adipocytes |
| Rasl12       | 0         | 0.866 | 0.563 | 0.129 | 0         | Adipocytes |
| Slc12a2      | 0         | 0.863 | 0.605 | 0.162 | 0         | Adipocytes |
| Flacc1       | 0         | 0.862 | 0.497 | 0.035 | 0         | Adipocytes |
| Tkt          | 0         | 0.861 | 0.644 | 0.221 | 0         | Adipocytes |
| Pex5l        | 0         | 0.858 | 0.394 | 0.066 | 0         | Adipocytes |
| Trim67       | 0         | 0.855 | 0.473 | 0.022 | 0         | Adipocytes |
| Scp2         | 0         | 0.845 | 0.606 | 0.145 | 0         | Adipocytes |
| Pabpc1l      | 0         | 0.842 | 0.505 | 0.011 | 0         | Adipocytes |
| Aqp7         | 0         | 0.839 | 0.558 | 0.019 | 0         | Adipocytes |
| Thrsp        | 0         | 0.828 | 0.411 | 0.004 | 0         | Adipocytes |
| Mc2r         | 0         | 0.819 | 0.501 | 0.04  | 0         | Adipocytes |
| Gpr156       | 0         | 0.801 | 0.428 | 0.024 | 0         | Adipocytes |
| Adora1       | 0         | 0.793 | 0.511 | 0.035 | 0         | Adipocytes |
| Dysf         | 0         | 0.786 | 0.529 | 0.142 | 0         | Adipocytes |
| Laptn4b      | 0         | 0.786 | 0.548 | 0.109 | 0         | Adipocytes |
| Cav2         | 0         | 0.785 | 0.551 | 0.063 | 0         | Adipocytes |
| Tmeff1       | 0         | 0.766 | 0.600 | 0.185 | 0         | Adipocytes |
| Mdh1         | 0         | 0.765 | 0.595 | 0.151 | 0         | Adipocytes |
| Itga1        | 0         | 0.759 | 0.533 | 0.133 | 0         | Adipocytes |
| Kcnb1        | 0         | 0.750 | 0.452 | 0.05  | 0         | Adipocytes |
| Itgad        | 0         | 0.748 | 0.333 | 0.008 | 0         | Adipocytes |
| Tcim         | 0         | 0.741 | 0.476 | 0.032 | 0         | Adipocytes |
| Ranbp17      | 0         | 0.739 | 0.626 | 0.249 | 0         | Adipocytes |
| Cyp2e1       | 0         | 0.737 | 0.307 | 0.013 | 0         | Adipocytes |
| Mgst3        | 0         | 0.711 | 0.510 | 0.086 | 0         | Adipocytes |
| Taldo1       | 0         | 0.695 | 0.579 | 0.168 | 0         | Adipocytes |
| Grin2b       | 0         | 0.682 | 0.451 | 0.024 | 0         | Adipocytes |
| Ifi27        | 0         | 0.676 | 0.560 | 0.199 | 0         | Adipocytes |
| Wdr93        | 0         | 0.672 | 0.456 | 0.014 | 0         | Adipocytes |
| Pclo         | 0         | 0.671 | 0.472 | 0.043 | 0         | Adipocytes |
| Cux2         | 0         | 0.664 | 0.454 | 0.044 | 0         | Adipocytes |
| Klhdc7a      | 0         | 0.659 | 0.440 | 0.003 | 0         | Adipocytes |
| 5033425B01Ri | 0         | 0.653 | 0.446 | 0.016 | 0         | Adipocytes |
| Zdhhc2       | 0         | 0.652 | 0.499 | 0.193 | 0         | Adipocytes |
| Rasd1        | 0         | 0.638 | 0.436 | 0.004 | 0         | Adipocytes |
| Fam83a       | 0         | 0.636 | 0.437 | 0.026 | 0         | Adipocytes |
| Btg1         | 0         | 0.634 | 0.619 | 0.218 | 0         | Adipocytes |
| Kcnj15       | 0         | 0.611 | 0.307 | 0.002 | 0         | Adipocytes |
| Marc1        | 0         | 0.593 | 0.398 | 0.015 | 0         | Adipocytes |
| Syt12        | 0         | 0.585 | 0.384 | 0.012 | 0         | Adipocytes |
| Mettl24      | 0         | 0.578 | 0.436 | 0.113 | 0         | Adipocytes |
| Tph2         | 0         | 0.576 | 0.358 | 0.023 | 0         | Adipocytes |
| Crtac1       | 0         | 0.567 | 0.436 | 0.003 | 0         | Adipocytes |
| Ces1f        | 0         | 0.563 | 0.361 | 0.042 | 0         | Adipocytes |
| Gpc5         | 0         | 0.558 | 0.307 | 0.01  | 0         | Adipocytes |
| Efcab8       | 0         | 0.558 | 0.389 | 0.04  | 0         | Adipocytes |
| Bicdl1       | 0         | 0.503 | 0.415 | 0.03  | 0         | Adipocytes |
| Dpf3         | 5.96E-308 | 0.786 | 0.643 | 0.344 | 1.19E-304 | Adipocytes |
| Sesn2        | 6.23E-301 | 0.785 | 0.500 | 0.193 | 1.25E-297 | Adipocytes |
| Nabp1        | 1.07E-299 | 0.839 | 0.685 | 0.299 | 2.15E-296 | Adipocytes |
| Mid1         | 3.64E-297 | 1.254 | 0.959 | 0.662 | 7.28E-294 | Adipocytes |
| Itih5        | 2.44E-287 | 0.883 | 0.895 | 0.49  | 4.88E-284 | Adipocytes |

|              |           |        |       |       |           |            |
|--------------|-----------|--------|-------|-------|-----------|------------|
| Auts2        | 4.28E-286 | 0.926  | 0.907 | 0.627 | 8.57E-283 | Adipocytes |
| Aldh1a1      | 1.29E-281 | 0.974  | 0.955 | 0.697 | 2.59E-278 | Adipocytes |
| Arhgap26     | 7.99E-280 | 0.827  | 0.619 | 0.299 | 1.60E-276 | Adipocytes |
| Ldha         | 6.18E-278 | 0.535  | 0.508 | 0.174 | 1.24E-274 | Adipocytes |
| 4931406P16Ri | 3.52E-277 | 1.309  | 0.813 | 0.576 | 7.05E-274 | Adipocytes |
| Nkd1         | 3.61E-272 | 0.568  | 0.468 | 0.154 | 7.22E-269 | Adipocytes |
| Col5a3       | 7.61E-267 | 1.173  | 0.814 | 0.524 | 1.52E-263 | Adipocytes |
| Gcnt2        | 4.27E-264 | 0.807  | 0.544 | 0.25  | 8.53E-261 | Adipocytes |
| Atp5f1       | 1.19E-263 | 0.557  | 0.588 | 0.261 | 2.39E-260 | Adipocytes |
| Met          | 2.52E-257 | 0.812  | 0.527 | 0.228 | 5.04E-254 | Adipocytes |
| Hivep3       | 1.13E-252 | 0.901  | 0.874 | 0.656 | 2.26E-249 | Adipocytes |
| Pgd          | 7.84E-250 | 0.550  | 0.566 | 0.26  | 1.57E-246 | Adipocytes |
| Rin2         | 1.18E-243 | 0.930  | 0.892 | 0.71  | 2.36E-240 | Adipocytes |
| Nlrc5        | 1.50E-243 | 0.714  | 0.673 | 0.398 | 2.99E-240 | Adipocytes |
| Matn2        | 3.42E-243 | 0.954  | 0.499 | 0.193 | 6.83E-240 | Adipocytes |
| Adcy6        | 1.14E-237 | 0.578  | 0.540 | 0.255 | 2.28E-234 | Adipocytes |
| Oxct1        | 3.20E-233 | 0.859  | 0.802 | 0.473 | 6.39E-230 | Adipocytes |
| Dok6         | 3.18E-232 | 1.133  | 0.601 | 0.395 | 6.36E-229 | Adipocytes |
| Angpt1       | 3.69E-232 | 0.932  | 0.776 | 0.487 | 7.39E-229 | Adipocytes |
| Adamts5      | 2.17E-231 | 0.808  | 0.948 | 0.645 | 4.34E-228 | Adipocytes |
| Clstn2       | 1.64E-230 | 0.775  | 0.478 | 0.204 | 3.29E-227 | Adipocytes |
| Fam184a      | 2.86E-229 | 0.648  | 0.466 | 0.183 | 5.72E-226 | Adipocytes |
| Atp6v0a1     | 1.65E-228 | 0.571  | 0.932 | 0.615 | 3.31E-225 | Adipocytes |
| Anxa5        | 6.25E-219 | 0.571  | 0.628 | 0.312 | 1.25E-215 | Adipocytes |
| Grhl1        | 1.95E-217 | 0.547  | 0.371 | 0.068 | 3.90E-214 | Adipocytes |
| Rbm47        | 3.06E-217 | 0.564  | 0.927 | 0.54  | 6.11E-214 | Adipocytes |
| Ccdc152      | 3.88E-217 | 0.721  | 0.461 | 0.214 | 7.75E-214 | Adipocytes |
| Eda          | 1.66E-215 | 0.567  | 0.891 | 0.67  | 3.32E-212 | Adipocytes |
| Clec3b       | 5.52E-215 | -1.933 | 0.150 | 0.554 | 1.10E-211 | Adipocytes |
| Pde1a        | 2.19E-213 | 0.798  | 0.756 | 0.453 | 4.39E-210 | Adipocytes |
| Dcn          | 5.41E-210 | -2.500 | 0.350 | 0.659 | 1.08E-206 | Adipocytes |
| Erc2         | 2.07E-204 | 0.570  | 0.409 | 0.147 | 4.14E-201 | Adipocytes |
| Ttyh2        | 6.66E-203 | 0.618  | 0.652 | 0.418 | 1.33E-199 | Adipocytes |
| Arid5b       | 1.08E-202 | 0.698  | 0.887 | 0.67  | 2.15E-199 | Adipocytes |
| Dnajc6       | 3.30E-198 | 0.656  | 0.265 | 0.026 | 6.61E-195 | Adipocytes |
| Net1         | 4.84E-197 | 0.521  | 0.391 | 0.158 | 9.69E-194 | Adipocytes |
| Col1a2       | 1.51E-193 | -2.317 | 0.361 | 0.668 | 3.03E-190 | Adipocytes |
| Tank         | 1.16E-190 | 0.603  | 0.866 | 0.611 | 2.32E-187 | Adipocytes |
| P2ry14       | 1.55E-175 | 0.561  | 0.520 | 0.299 | 3.10E-172 | Adipocytes |
| Sema5a       | 3.14E-174 | 0.711  | 0.589 | 0.333 | 6.27E-171 | Adipocytes |
| Kcnt2        | 9.15E-160 | -1.273 | 0.263 | 0.644 | 1.83E-156 | Adipocytes |
| Fbln2        | 2.76E-158 | -1.349 | 0.187 | 0.493 | 5.52E-155 | Adipocytes |
| Nkain2       | 2.59E-155 | 1.252  | 0.519 | 0.284 | 5.17E-152 | Adipocytes |
| Clic4        | 1.47E-153 | 0.633  | 0.767 | 0.528 | 2.95E-150 | Adipocytes |
| Kitl         | 3.03E-150 | -0.907 | 0.436 | 0.759 | 6.05E-147 | Adipocytes |
| Nos1ap       | 4.57E-149 | 0.768  | 0.646 | 0.471 | 9.14E-146 | Adipocytes |
| Col3a1       | 1.79E-145 | -2.394 | 0.518 | 0.768 | 3.57E-142 | Adipocytes |
| Col14a1      | 6.74E-145 | -2.134 | 0.412 | 0.707 | 1.35E-141 | Adipocytes |
| Gpt2         | 9.75E-145 | 0.760  | 0.540 | 0.339 | 1.95E-141 | Adipocytes |
| Pdk4         | 2.35E-144 | 0.662  | 0.418 | 0.255 | 4.70E-141 | Adipocytes |
| Col1a1       | 8.52E-142 | -1.792 | 0.239 | 0.537 | 1.70E-138 | Adipocytes |
| Btc          | 2.79E-141 | 0.564  | 0.297 | 0.057 | 5.59E-138 | Adipocytes |
| Nox4         | 5.20E-136 | -2.357 | 0.465 | 0.732 | 1.04E-132 | Adipocytes |
| mt-Nd6       | 3.06E-133 | -1.074 | 0.472 | 0.726 | 6.12E-130 | Adipocytes |
| Nr1h4        | 8.15E-133 | -0.930 | 0.188 | 0.518 | 1.63E-129 | Adipocytes |
| Cenpu        | 1.33E-130 | 0.509  | 0.401 | 0.259 | 2.66E-127 | Adipocytes |
| Hp           | 7.94E-128 | 0.529  | 0.290 | 0.058 | 1.59E-124 | Adipocytes |
| Gask1b       | 2.39E-127 | 0.650  | 0.665 | 0.485 | 4.78E-124 | Adipocytes |
| St6galnac5   | 4.17E-127 | 1.167  | 0.446 | 0.271 | 8.35E-124 | Adipocytes |
| Calcr1       | 2.39E-123 | -1.238 | 0.389 | 0.686 | 4.78E-120 | Adipocytes |
| Sugct        | 3.56E-122 | 0.720  | 0.627 | 0.528 | 7.13E-119 | Adipocytes |
| Pcdh9        | 2.89E-120 | -1.957 | 0.335 | 0.634 | 5.78E-117 | Adipocytes |



|         |           |        |       |       |           |            |
|---------|-----------|--------|-------|-------|-----------|------------|
| Sctr    | 7.67E-120 | 0.580  | 0.251 | 0.022 | 1.53E-116 | Adipocytes |
| Zfp385b | 1.58E-118 | 0.716  | 0.491 | 0.311 | 3.16E-115 | Adipocytes |
| Pitpnc1 | 2.70E-117 | -1.650 | 0.610 | 0.739 | 5.41E-114 | Adipocytes |
| Mfap5   | 3.13E-112 | -1.739 | 0.309 | 0.555 | 6.25E-109 | Adipocytes |
| Prkg1   | 2.76E-108 | -1.865 | 0.495 | 0.753 | 5.53E-105 | Adipocytes |
| Sntg2   | 1.13E-105 | 0.544  | 0.461 | 0.305 | 2.26E-102 | Adipocytes |
| Lvrn    | 3.74E-105 | -1.356 | 0.297 | 0.582 | 7.47E-102 | Adipocytes |
| Adamts1 | 6.69E-104 | -2.010 | 0.542 | 0.767 | 1.34E-100 | Adipocytes |
| Gfpt2   | 2.38E-102 | -1.848 | 0.371 | 0.594 | 4.76E-99  | Adipocytes |
| Gas6    | 7.79E-102 | -0.738 | 0.179 | 0.493 | 1.56E-98  | Adipocytes |
| Sfrp4   | 2.71E-101 | -0.894 | 0.026 | 0.324 | 5.43E-98  | Adipocytes |
| Ptch2   | 7.88E-100 | 0.578  | 0.408 | 0.222 | 1.58E-96  | Adipocytes |
| Rab7b   | 1.14E-99  | -0.830 | 0.241 | 0.566 | 2.27E-96  | Adipocytes |
| Insyn2b | 1.46E-99  | -0.717 | 0.229 | 0.455 | 2.91E-96  | Adipocytes |
| Galnt17 | 1.94E-99  | -1.142 | 0.332 | 0.601 | 3.88E-96  | Adipocytes |
| Pi16    | 4.66E-99  | -2.190 | 0.290 | 0.551 | 9.33E-96  | Adipocytes |
| Kcnq5   | 1.63E-98  | -0.927 | 0.212 | 0.52  | 3.26E-95  | Adipocytes |
| Gabra3  | 5.51E-95  | -1.394 | 0.313 | 0.571 | 1.10E-91  | Adipocytes |
| Rorb    | 8.35E-95  | -1.294 | 0.272 | 0.549 | 1.67E-91  | Adipocytes |
| Sema6a  | 2.00E-92  | -0.532 | 0.291 | 0.602 | 4.01E-89  | Adipocytes |
| Postn   | 4.48E-92  | -1.180 | 0.235 | 0.451 | 8.96E-89  | Adipocytes |
| Timp3   | 6.76E-92  | -0.934 | 0.252 | 0.473 | 1.35E-88  | Adipocytes |
| Myo1e   | 2.58E-91  | -1.543 | 0.491 | 0.701 | 5.17E-88  | Adipocytes |
| Gm17268 | 1.65E-90  | 0.758  | 0.447 | 0.332 | 3.30E-87  | Adipocytes |
| Apcdd1  | 2.09E-90  | 0.526  | 0.390 | 0.202 | 4.18E-87  | Adipocytes |
| Cdh9    | 5.23E-90  | -0.731 | 0.235 | 0.499 | 1.05E-86  | Adipocytes |
| Rnf180  | 2.95E-88  | -0.509 | 0.296 | 0.593 | 5.90E-85  | Adipocytes |
| Gabre   | 5.77E-87  | -0.526 | 0.157 | 0.381 | 1.15E-83  | Adipocytes |
| Itgbl1  | 6.89E-87  | -1.857 | 0.441 | 0.688 | 1.38E-83  | Adipocytes |
| Ano3    | 3.07E-84  | -1.332 | 0.241 | 0.494 | 6.13E-81  | Adipocytes |
| Chn2    | 9.61E-83  | -1.153 | 0.295 | 0.574 | 1.92E-79  | Adipocytes |
| Sema3d  | 6.20E-82  | -0.882 | 0.171 | 0.379 | 1.24E-78  | Adipocytes |
| Plagl1  | 2.77E-81  | 0.522  | 0.321 | 0.168 | 5.55E-78  | Adipocytes |
| Aebp1   | 1.21E-79  | -1.198 | 0.041 | 0.344 | 2.41E-76  | Adipocytes |
| Mgmt    | 2.20E-79  | 0.520  | 0.541 | 0.456 | 4.41E-76  | Adipocytes |
| C6      | 5.55E-78  | 0.530  | 0.430 | 0.307 | 1.11E-74  | Adipocytes |
| Lcp1    | 5.50E-77  | -1.355 | 0.326 | 0.486 | 1.10E-73  | Adipocytes |
| Pla2g7  | 1.00E-76  | -0.719 | 0.152 | 0.378 | 2.01E-73  | Adipocytes |
| C5ar1   | 1.42E-76  | -0.535 | 0.127 | 0.365 | 2.83E-73  | Adipocytes |
| Ror1    | 4.97E-75  | -1.129 | 0.383 | 0.643 | 9.93E-72  | Adipocytes |
| Sema3e  | 8.56E-75  | -1.666 | 0.331 | 0.566 | 1.71E-71  | Adipocytes |
| Ctss    | 2.89E-73  | -1.096 | 0.160 | 0.378 | 5.79E-70  | Adipocytes |
| Osbp13  | 4.58E-73  | -0.681 | 0.293 | 0.586 | 9.15E-70  | Adipocytes |
| Gria3   | 8.13E-72  | -1.008 | 0.313 | 0.597 | 1.63E-68  | Adipocytes |
| Msr1    | 1.16E-71  | -0.611 | 0.222 | 0.42  | 2.32E-68  | Adipocytes |
| Plac8   | 2.81E-71  | -0.552 | 0.046 | 0.396 | 5.62E-68  | Adipocytes |
| Basp1   | 4.13E-71  | -0.769 | 0.236 | 0.526 | 8.26E-68  | Adipocytes |
| Eln     | 7.88E-71  | -1.657 | 0.320 | 0.532 | 1.58E-67  | Adipocytes |
| Cybb    | 8.32E-71  | -0.974 | 0.180 | 0.376 | 1.66E-67  | Adipocytes |
| Myo1f   | 1.72E-68  | -1.535 | 0.421 | 0.53  | 3.44E-65  | Adipocytes |
| Thsd7a  | 2.64E-67  | -1.432 | 0.515 | 0.718 | 5.28E-64  | Adipocytes |
| St8sia4 | 4.12E-66  | -1.161 | 0.271 | 0.428 | 8.24E-63  | Adipocytes |
| Xylt1   | 5.56E-66  | -1.077 | 0.481 | 0.641 | 1.11E-62  | Adipocytes |
| Bmp6    | 2.24E-65  | -0.820 | 0.235 | 0.483 | 4.48E-62  | Adipocytes |
| Clec10a | 5.43E-65  | -1.230 | 0.306 | 0.468 | 1.09E-61  | Adipocytes |
| Mmp3    | 2.27E-64  | -0.783 | 0.141 | 0.316 | 4.53E-61  | Adipocytes |
| Igfbp6  | 2.96E-64  | -1.212 | 0.062 | 0.313 | 5.91E-61  | Adipocytes |
| Itga4   | 3.51E-64  | -1.254 | 0.274 | 0.437 | 7.03E-61  | Adipocytes |
| Fyb     | 1.46E-63  | -1.583 | 0.430 | 0.542 | 2.93E-60  | Adipocytes |
| Skap1   | 9.14E-63  | -0.522 | 0.084 | 0.276 | 1.83E-59  | Adipocytes |
| Cd84    | 1.24E-62  | -1.373 | 0.356 | 0.485 | 2.47E-59  | Adipocytes |
| Ly6a    | 2.35E-62  | -1.195 | 0.063 | 0.375 | 4.71E-59  | Adipocytes |

|           |          |        |       |       |          |            |
|-----------|----------|--------|-------|-------|----------|------------|
| Adamts13  | 8.17E-62 | -0.847 | 0.232 | 0.471 | 1.63E-58 | Adipocytes |
| Ms4a7     | 1.04E-59 | -0.533 | 0.248 | 0.433 | 2.09E-56 | Adipocytes |
| Vcan      | 4.01E-59 | -1.435 | 0.349 | 0.587 | 8.03E-56 | Adipocytes |
| Lyve1     | 6.78E-58 | -0.617 | 0.047 | 0.297 | 1.36E-54 | Adipocytes |
| Spi1      | 4.87E-57 | -0.783 | 0.256 | 0.409 | 9.75E-54 | Adipocytes |
| Col4a5    | 1.38E-56 | -0.615 | 0.279 | 0.51  | 2.77E-53 | Adipocytes |
| Plek      | 1.89E-56 | -0.636 | 0.169 | 0.474 | 3.78E-53 | Adipocytes |
| Nckap1l   | 2.34E-56 | -0.914 | 0.320 | 0.447 | 4.68E-53 | Adipocytes |
| Diaph3    | 3.87E-56 | -0.765 | 0.285 | 0.551 | 7.74E-53 | Adipocytes |
| Lyz2      | 9.77E-56 | -1.250 | 0.138 | 0.362 | 1.95E-52 | Adipocytes |
| Sntg1     | 2.45E-55 | -2.031 | 0.367 | 0.599 | 4.90E-52 | Adipocytes |
| Eya4      | 9.34E-55 | -0.799 | 0.364 | 0.607 | 1.87E-51 | Adipocytes |
| Emb       | 1.85E-54 | -0.657 | 0.206 | 0.466 | 3.71E-51 | Adipocytes |
| Gpnmb     | 2.17E-54 | -1.121 | 0.194 | 0.427 | 4.34E-51 | Adipocytes |
| B4galt5   | 2.40E-53 | -0.750 | 0.353 | 0.577 | 4.80E-50 | Adipocytes |
| Prss23    | 1.04E-52 | -0.753 | 0.045 | 0.268 | 2.09E-49 | Adipocytes |
| Lgmn      | 2.72E-52 | -1.211 | 0.294 | 0.465 | 5.45E-49 | Adipocytes |
| Smpd3     | 3.26E-52 | -1.533 | 0.342 | 0.579 | 6.52E-49 | Adipocytes |
| Adgre1    | 3.80E-52 | -1.458 | 0.419 | 0.51  | 7.60E-49 | Adipocytes |
| Sgip1     | 5.33E-52 | -0.596 | 0.278 | 0.524 | 1.07E-48 | Adipocytes |
| Nav2      | 3.62E-50 | -0.539 | 0.209 | 0.464 | 7.23E-47 | Adipocytes |
| Ngf       | 1.61E-49 | -0.528 | 0.159 | 0.332 | 3.21E-46 | Adipocytes |
| Shtn1     | 1.98E-48 | -1.223 | 0.403 | 0.484 | 3.96E-45 | Adipocytes |
| Blnk      | 9.08E-47 | -1.179 | 0.390 | 0.493 | 1.82E-43 | Adipocytes |
| Epha3     | 1.04E-46 | -1.104 | 0.261 | 0.455 | 2.08E-43 | Adipocytes |
| Ccl6      | 3.73E-46 | -0.998 | 0.182 | 0.358 | 7.47E-43 | Adipocytes |
| Gria4     | 1.36E-45 | -0.991 | 0.196 | 0.407 | 2.71E-42 | Adipocytes |
| Pcdh19    | 1.88E-45 | -1.049 | 0.391 | 0.56  | 3.76E-42 | Adipocytes |
| Pde10a    | 6.03E-45 | -0.798 | 0.171 | 0.432 | 1.21E-41 | Adipocytes |
| Dclk1     | 7.13E-45 | -0.890 | 0.437 | 0.628 | 1.43E-41 | Adipocytes |
| Igfbp5    | 1.30E-43 | -1.729 | 0.247 | 0.424 | 2.59E-40 | Adipocytes |
| C1qtnf7   | 2.14E-43 | -1.045 | 0.293 | 0.496 | 4.28E-40 | Adipocytes |
| Serpinf1  | 3.47E-43 | -1.092 | 0.166 | 0.332 | 6.93E-40 | Adipocytes |
| Anpep     | 4.01E-43 | -0.666 | 0.143 | 0.46  | 8.02E-40 | Adipocytes |
| Csf2ra    | 3.29E-41 | -0.918 | 0.346 | 0.42  | 6.57E-38 | Adipocytes |
| Gas2l3    | 7.60E-41 | -0.591 | 0.278 | 0.419 | 1.52E-37 | Adipocytes |
| Il7r      | 9.45E-41 | -0.514 | 0.152 | 0.307 | 1.89E-37 | Adipocytes |
| Ednrb     | 9.51E-41 | -0.824 | 0.252 | 0.425 | 1.90E-37 | Adipocytes |
| Cd200r1   | 5.92E-40 | -1.087 | 0.331 | 0.452 | 1.18E-36 | Adipocytes |
| Pik3r5    | 3.04E-39 | -0.786 | 0.269 | 0.42  | 6.09E-36 | Adipocytes |
| Gpc3      | 3.99E-39 | -0.853 | 0.267 | 0.448 | 7.99E-36 | Adipocytes |
| Ripor2    | 4.39E-39 | -0.664 | 0.238 | 0.424 | 8.77E-36 | Adipocytes |
| Col8a1    | 9.64E-39 | -0.764 | 0.219 | 0.386 | 1.93E-35 | Adipocytes |
| Slc25a21  | 1.57E-38 | -0.521 | 0.134 | 0.295 | 3.14E-35 | Adipocytes |
| Fgf7      | 6.30E-38 | -0.648 | 0.251 | 0.392 | 1.26E-34 | Adipocytes |
| Ppp2r2b   | 1.14E-37 | -1.157 | 0.253 | 0.459 | 2.28E-34 | Adipocytes |
| Tnfrsf11a | 1.51E-37 | -0.851 | 0.348 | 0.469 | 3.02E-34 | Adipocytes |
| Rgs6      | 1.91E-37 | -1.212 | 0.333 | 0.548 | 3.83E-34 | Adipocytes |
| Ccr2      | 3.35E-37 | -1.170 | 0.091 | 0.287 | 6.70E-34 | Adipocytes |
| Ms4a6c    | 1.84E-36 | -0.775 | 0.271 | 0.411 | 3.68E-33 | Adipocytes |
| Wdfy4     | 4.07E-35 | -0.922 | 0.330 | 0.429 | 8.14E-32 | Adipocytes |
| Ntn4      | 6.04E-35 | -0.934 | 0.236 | 0.426 | 1.21E-31 | Adipocytes |
| Zfyve28   | 1.22E-34 | 0.583  | 0.499 | 0.515 | 2.43E-31 | Adipocytes |
| Map1b     | 1.52E-34 | -0.673 | 0.189 | 0.346 | 3.05E-31 | Adipocytes |
| Mpeg1     | 2.11E-34 | -0.507 | 0.020 | 0.259 | 4.23E-31 | Adipocytes |
| Car8      | 4.89E-34 | -0.801 | 0.210 | 0.376 | 9.77E-31 | Adipocytes |
| Plxnc1    | 1.12E-33 | -0.517 | 0.234 | 0.371 | 2.24E-30 | Adipocytes |
| Lilr4b    | 3.04E-33 | -0.504 | 0.197 | 0.353 | 6.09E-30 | Adipocytes |
| C7        | 3.11E-33 | -2.115 | 0.288 | 0.442 | 6.22E-30 | Adipocytes |
| Tec       | 7.91E-33 | -0.798 | 0.343 | 0.454 | 1.58E-29 | Adipocytes |
| Cd248     | 2.08E-32 | -0.860 | 0.062 | 0.271 | 4.16E-29 | Adipocytes |
| Apod      | 2.23E-32 | -0.665 | 0.124 | 0.291 | 4.46E-29 | Adipocytes |

|            |          |        |       |       |          |            |
|------------|----------|--------|-------|-------|----------|------------|
| Gucy1a2    | 2.55E-32 | -0.564 | 0.225 | 0.42  | 5.10E-29 | Adipocytes |
| Smoc2      | 2.77E-32 | -0.706 | 0.279 | 0.444 | 5.53E-29 | Adipocytes |
| Il1r2      | 7.90E-32 | -0.525 | 0.126 | 0.283 | 1.58E-28 | Adipocytes |
| Abca8a     | 1.98E-31 | -1.349 | 0.493 | 0.604 | 3.96E-28 | Adipocytes |
| Sirpa      | 1.71E-30 | -0.979 | 0.362 | 0.512 | 3.43E-27 | Adipocytes |
| St18       | 2.00E-30 | -0.913 | 0.326 | 0.457 | 4.01E-27 | Adipocytes |
| Kcnk13     | 2.24E-30 | -0.930 | 0.366 | 0.488 | 4.47E-27 | Adipocytes |
| Aspn       | 2.54E-30 | -1.127 | 0.284 | 0.424 | 5.09E-27 | Adipocytes |
| Ubash3b    | 4.33E-30 | -1.070 | 0.357 | 0.484 | 8.65E-27 | Adipocytes |
| Fat3       | 5.95E-30 | -0.718 | 0.254 | 0.383 | 1.19E-26 | Adipocytes |
| Robo1      | 2.39E-29 | -1.272 | 0.421 | 0.587 | 4.78E-26 | Adipocytes |
| Errfi1     | 3.11E-29 | -1.297 | 0.360 | 0.557 | 6.22E-26 | Adipocytes |
| Srgap3     | 5.58E-29 | -0.507 | 0.190 | 0.445 | 1.12E-25 | Adipocytes |
| Fnip2      | 5.64E-29 | -0.743 | 0.636 | 0.763 | 1.13E-25 | Adipocytes |
| Cfh        | 2.11E-27 | -1.602 | 0.425 | 0.572 | 4.23E-24 | Adipocytes |
| Plxna4     | 2.99E-27 | -0.801 | 0.355 | 0.498 | 5.98E-24 | Adipocytes |
| Specc1     | 5.19E-27 | -0.826 | 0.432 | 0.534 | 1.04E-23 | Adipocytes |
| C3         | 1.81E-26 | -1.201 | 0.129 | 0.317 | 3.62E-23 | Adipocytes |
| Epsti1     | 2.04E-26 | -1.261 | 0.421 | 0.492 | 4.08E-23 | Adipocytes |
| Atp6v0d2   | 2.26E-26 | -1.002 | 0.320 | 0.44  | 4.52E-23 | Adipocytes |
| Sult1e1    | 8.41E-26 | -0.823 | 0.185 | 0.315 | 1.68E-22 | Adipocytes |
| Meox2      | 1.07E-25 | -0.833 | 0.298 | 0.463 | 2.14E-22 | Adipocytes |
| Ptpn22     | 1.62E-25 | -0.876 | 0.271 | 0.382 | 3.24E-22 | Adipocytes |
| Plcx3      | 1.97E-25 | -1.149 | 0.215 | 0.387 | 3.94E-22 | Adipocytes |
| Dkk2       | 4.30E-25 | -0.778 | 0.212 | 0.382 | 8.60E-22 | Adipocytes |
| Cdk6       | 6.98E-25 | -0.624 | 0.355 | 0.521 | 1.40E-21 | Adipocytes |
| Kctd12     | 7.01E-25 | -0.624 | 0.086 | 0.304 | 1.40E-21 | Adipocytes |
| Arhgap25   | 5.24E-24 | -0.876 | 0.311 | 0.408 | 1.05E-20 | Adipocytes |
| Csmd1      | 1.01E-23 | -1.119 | 0.179 | 0.313 | 2.03E-20 | Adipocytes |
| Aoah       | 1.16E-22 | -0.724 | 0.362 | 0.484 | 2.31E-19 | Adipocytes |
| Cotl1      | 1.69E-22 | -0.620 | 0.163 | 0.345 | 3.38E-19 | Adipocytes |
| Cst3       | 5.55E-22 | -0.787 | 0.037 | 0.358 | 1.11E-18 | Adipocytes |
| C1qb       | 5.66E-22 | -0.901 | 0.165 | 0.32  | 1.13E-18 | Adipocytes |
| Nlgn1      | 6.25E-22 | -0.673 | 0.159 | 0.296 | 1.25E-18 | Adipocytes |
| Hspa5      | 6.64E-22 | -0.731 | 0.195 | 0.431 | 1.33E-18 | Adipocytes |
| Cd44       | 9.26E-22 | -1.466 | 0.407 | 0.508 | 1.85E-18 | Adipocytes |
| Cd300a     | 1.07E-21 | -0.759 | 0.292 | 0.376 | 2.15E-18 | Adipocytes |
| Ddx60      | 1.51E-21 | -0.610 | 0.518 | 0.68  | 3.01E-18 | Adipocytes |
| Fnbp1l     | 1.68E-21 | -0.561 | 0.195 | 0.437 | 3.35E-18 | Adipocytes |
| Gpm6b      | 5.49E-21 | -0.608 | 0.230 | 0.374 | 1.10E-17 | Adipocytes |
| Nipal2     | 5.79E-21 | -0.672 | 0.167 | 0.317 | 1.16E-17 | Adipocytes |
| Bgn        | 8.27E-21 | -0.864 | 0.078 | 0.253 | 1.65E-17 | Adipocytes |
| Ccr5       | 2.13E-20 | -0.681 | 0.258 | 0.361 | 4.27E-17 | Adipocytes |
| Ehd4       | 4.42E-20 | -1.009 | 0.345 | 0.466 | 8.84E-17 | Adipocytes |
| Fmo2       | 8.70E-20 | -0.862 | 0.215 | 0.32  | 1.74E-16 | Adipocytes |
| Adamts16   | 6.04E-19 | -0.952 | 0.221 | 0.385 | 1.21E-15 | Adipocytes |
| Mafb       | 1.34E-18 | -0.817 | 0.228 | 0.361 | 2.67E-15 | Adipocytes |
| Ldb2       | 4.34E-18 | -0.713 | 0.333 | 0.489 | 8.67E-15 | Adipocytes |
| Hexa       | 4.36E-18 | -0.571 | 0.208 | 0.429 | 8.71E-15 | Adipocytes |
| Cfp        | 9.23E-17 | -0.603 | 0.139 | 0.287 | 1.85E-13 | Adipocytes |
| Pcolce     | 3.16E-16 | -0.686 | 0.135 | 0.331 | 6.32E-13 | Adipocytes |
| Itgb2      | 3.67E-16 | -0.522 | 0.088 | 0.272 | 7.34E-13 | Adipocytes |
| Pola1      | 5.70E-16 | -0.504 | 0.535 | 0.666 | 1.14E-12 | Adipocytes |
| Stab1      | 2.07E-15 | -0.879 | 0.416 | 0.487 | 4.15E-12 | Adipocytes |
| Abcg3      | 3.74E-15 | -0.600 | 0.211 | 0.334 | 7.47E-12 | Adipocytes |
| Csgalnact1 | 7.78E-15 | -0.631 | 0.430 | 0.577 | 1.56E-11 | Adipocytes |
| Ciita      | 1.21E-14 | -0.648 | 0.177 | 0.319 | 2.42E-11 | Adipocytes |
| Bank1      | 2.90E-14 | -0.776 | 0.303 | 0.399 | 5.80E-11 | Adipocytes |
| Col12a1    | 6.78E-14 | -0.803 | 0.317 | 0.393 | 1.36E-10 | Adipocytes |
| Cd180      | 1.50E-13 | -0.661 | 0.224 | 0.337 | 3.01E-10 | Adipocytes |
| Cd300lb    | 2.94E-13 | -0.572 | 0.290 | 0.367 | 5.88E-10 | Adipocytes |
| Gm         | 2.99E-13 | -0.793 | 0.196 | 0.396 | 5.98E-10 | Adipocytes |

|           |           |        |       |       |             |                 |
|-----------|-----------|--------|-------|-------|-------------|-----------------|
| Aldh1a3   | 5.50E-13  | -0.665 | 0.226 | 0.337 | 1.10E-09    | Adipocytes      |
| Ftl1      | 1.39E-12  | -0.651 | 0.146 | 0.333 | 2.78E-09    | Adipocytes      |
| Selenop   | 1.83E-12  | -1.127 | 0.399 | 0.497 | 3.65E-09    | Adipocytes      |
| Cacna1d   | 2.81E-12  | -0.803 | 0.417 | 0.486 | 5.62E-09    | Adipocytes      |
| Abhd12    | 2.99E-12  | -0.520 | 0.748 | 0.537 | 5.98E-09    | Adipocytes      |
| Prkcb     | 9.45E-12  | -0.892 | 0.419 | 0.473 | 1.89E-08    | Adipocytes      |
| Foxp2     | 9.59E-12  | -0.658 | 0.198 | 0.303 | 1.92E-08    | Adipocytes      |
| Ms4a6b    | 1.33E-11  | -0.517 | 0.305 | 0.395 | 2.65E-08    | Adipocytes      |
| Ccbe1     | 5.64E-10  | -0.662 | 0.228 | 0.336 | 1.13E-06    | Adipocytes      |
| P3h2      | 1.11E-09  | -0.643 | 0.348 | 0.449 | 2.22E-06    | Adipocytes      |
| Hmcn2     | 1.73E-09  | -0.979 | 0.300 | 0.423 | 3.46E-06    | Adipocytes      |
| Ctsb      | 1.07E-08  | -1.191 | 0.443 | 0.462 | 2.14E-05    | Adipocytes      |
| Ctsl      | 1.42E-08  | -0.662 | 0.107 | 0.348 | 2.84E-05    | Adipocytes      |
| Pde11a    | 3.69E-08  | -0.755 | 0.305 | 0.434 | 7.39E-05    | Adipocytes      |
| C1qa      | 4.37E-08  | -0.985 | 0.210 | 0.308 | 8.73E-05    | Adipocytes      |
| Mgl2      | 8.05E-08  | -0.660 | 0.118 | 0.251 | 0.000160919 | Adipocytes      |
| Apoe      | 1.66E-07  | -1.848 | 0.518 | 0.506 | 0.000332292 | Adipocytes      |
| Psap      | 1.85E-07  | -1.587 | 0.545 | 0.52  | 0.000370039 | Adipocytes      |
| Tmem106a  | 1.94E-07  | -0.517 | 0.274 | 0.422 | 0.000387528 | Adipocytes      |
| Cadm1     | 1.97E-07  | -0.945 | 0.352 | 0.41  | 0.000393837 | Adipocytes      |
| Entpd1    | 2.03E-07  | -0.885 | 0.407 | 0.504 | 0.000406611 | Adipocytes      |
| Atp8b4    | 6.26E-07  | -0.974 | 0.349 | 0.39  | 0.001251561 | Adipocytes      |
| Colec12   | 7.52E-07  | -0.603 | 0.533 | 0.67  | 0.001503999 | Adipocytes      |
| Soat1     | 7.57E-07  | -0.617 | 0.117 | 0.371 | 0.001514223 | Adipocytes      |
| Retnla    | 1.71E-06  | -1.363 | 0.201 | 0.302 | 0.003422922 | Adipocytes      |
| Mamdc2    | 1.80E-06  | -0.857 | 0.316 | 0.412 | 0.00360298  | Adipocytes      |
| Col6a1    | 1.98E-06  | -0.537 | 0.278 | 0.298 | 0.003951408 | Adipocytes      |
| Cdh13     | 2.18E-06  | -0.790 | 0.386 | 0.512 | 0.004361848 | Adipocytes      |
| Adamts12  | 3.07E-06  | -0.632 | 0.799 | 0.726 | 0.006149339 | Adipocytes      |
| Abtb2     | 9.76E-06  | -0.511 | 0.255 | 0.416 | 0.01951619  | Adipocytes      |
| Atp1a1    | 3.38E-05  | -0.535 | 0.077 | 0.328 | 0.067672227 | Adipocytes      |
| Thsd4     | 4.57E-05  | -0.641 | 0.085 | 0.311 | 0.091326282 | Adipocytes      |
| Pcolce2   | 0.0002026 | -0.774 | 0.471 | 0.479 | 0.405136152 | Adipocytes      |
| P2rx7     | 0.0003321 | -0.582 | 0.286 | 0.437 | 0.664288795 | Adipocytes      |
| Rasa1     | 0.0009316 | -0.704 | 0.795 | 0.699 | 1           | Adipocytes      |
| Tox       | 0.0013526 | -0.523 | 0.233 | 0.344 | 1           | Adipocytes      |
| Gsn       | 0.0013537 | -1.687 | 0.833 | 0.684 | 1           | Adipocytes      |
| Evl       | 0.0014528 | -0.864 | 0.344 | 0.389 | 1           | Adipocytes      |
| Trim25    | 0.0019791 | -0.626 | 0.408 | 0.496 | 1           | Adipocytes      |
| Lgals3    | 0.0021768 | -1.041 | 0.349 | 0.31  | 1           | Adipocytes      |
| Abca8b    | 0.0023905 | -0.541 | 0.473 | 0.45  | 1           | Adipocytes      |
| Cd9       | 0.0024486 | -0.603 | 0.117 | 0.338 | 1           | Adipocytes      |
| Adgre4    | 0.0031076 | -0.631 | 0.230 | 0.301 | 1           | Adipocytes      |
| Tmtc2     | 0.0037264 | -0.641 | 0.469 | 0.583 | 1           | Adipocytes      |
| Cd226     | 0.0040168 | -0.913 | 0.165 | 0.264 | 1           | Adipocytes      |
| Cd163     | 0.0062566 | -1.153 | 0.395 | 0.447 | 1           | Adipocytes      |
| Sdc2      | 0.0069273 | -0.718 | 0.539 | 0.588 | 1           | Adipocytes      |
| Nrp2      | 0.008412  | -0.715 | 0.407 | 0.439 | 1           | Adipocytes      |
| Dact2     | 0.0085063 | -0.531 | 0.148 | 0.268 | 1           | Adipocytes      |
| Igfbp7    | 0.0092416 | -0.508 | 0.399 | 0.365 | 1           | Adipocytes      |
| Pi16.1    | 0         | 3.228  | 0.936 | 0.358 | 0           | Preadipocytes_1 |
| Sema3e.1  | 0         | 3.124  | 0.886 | 0.402 | 0           | Preadipocytes_1 |
| Sntg1.1   | 0         | 2.846  | 0.801 | 0.482 | 0           | Preadipocytes_1 |
| Igfbp5.1  | 0         | 2.821  | 0.851 | 0.23  | 0           | Preadipocytes_1 |
| Gfpt2.1   | 0         | 2.791  | 0.933 | 0.426 | 0           | Preadipocytes_1 |
| Rgs6.1    | 0         | 2.431  | 0.741 | 0.437 | 0           | Preadipocytes_1 |
| Ano3.1    | 0         | 2.416  | 0.832 | 0.322 | 0           | Preadipocytes_1 |
| Col14a1.1 | 0         | 2.394  | 0.941 | 0.566 | 0           | Preadipocytes_1 |
| Rorb.1    | 0         | 2.389  | 0.779 | 0.413 | 0           | Preadipocytes_1 |
| Pcdh9.1   | 0         | 2.367  | 0.811 | 0.514 | 0           | Preadipocytes_1 |
| Adamts1.1 | 0         | 2.298  | 0.969 | 0.651 | 0           | Preadipocytes_1 |
| Mfap5.1   | 0         | 2.241  | 0.898 | 0.382 | 0           | Preadipocytes_1 |

|            |   |        |       |       |   |                 |
|------------|---|--------|-------|-------|---|-----------------|
| Nox4.1     | 0 | 2.195  | 0.956 | 0.6   | 0 | Preadipocytes_1 |
| Robo1.1    | 0 | 2.108  | 0.749 | 0.496 | 0 | Preadipocytes_1 |
| Adamts16.1 | 0 | 2.088  | 0.620 | 0.267 | 0 | Preadipocytes_1 |
| Smpd3.1    | 0 | 2.074  | 0.735 | 0.478 | 0 | Preadipocytes_1 |
| Lvrn.1     | 0 | 1.984  | 0.793 | 0.452 | 0 | Preadipocytes_1 |
| Vcan.1     | 0 | 1.899  | 0.815 | 0.458 | 0 | Preadipocytes_1 |
| Adamts5.1  | 0 | 1.857  | 0.964 | 0.577 | 0 | Preadipocytes_1 |
| Bmp6.1     | 0 | 1.833  | 0.690 | 0.36  | 0 | Preadipocytes_1 |
| Nr1h4.1    | 0 | 1.823  | 0.719 | 0.383 | 0 | Preadipocytes_1 |
| Pcolce2.1  | 0 | 1.798  | 0.803 | 0.355 | 0 | Preadipocytes_1 |
| Car8.1     | 0 | 1.761  | 0.655 | 0.24  | 0 | Preadipocytes_1 |
| Ugdh       | 0 | 1.749  | 0.732 | 0.359 | 0 | Preadipocytes_1 |
| Ntn4.1     | 0 | 1.718  | 0.677 | 0.297 | 0 | Preadipocytes_1 |
| Vgll3      | 0 | 1.713  | 0.876 | 0.492 | 0 | Preadipocytes_1 |
| Prkg1.1    | 0 | 1.711  | 0.894 | 0.654 | 0 | Preadipocytes_1 |
| Eya4.1     | 0 | 1.700  | 0.753 | 0.509 | 0 | Preadipocytes_1 |
| Errfi1.1   | 0 | 1.624  | 0.778 | 0.438 | 0 | Preadipocytes_1 |
| Nlgn1.1    | 0 | 1.587  | 0.502 | 0.194 | 0 | Preadipocytes_1 |
| Col12a1.1  | 0 | 1.571  | 0.683 | 0.269 | 0 | Preadipocytes_1 |
| Aldh1a3.1  | 0 | 1.567  | 0.615 | 0.212 | 0 | Preadipocytes_1 |
| Thsd7a.1   | 0 | 1.525  | 0.925 | 0.604 | 0 | Preadipocytes_1 |
| Clec3b.1   | 0 | 1.523  | 0.875 | 0.361 | 0 | Preadipocytes_1 |
| C3.1       | 0 | 1.509  | 0.628 | 0.166 | 0 | Preadipocytes_1 |
| Dcn.1      | 0 | 1.478  | 0.961 | 0.49  | 0 | Preadipocytes_1 |
| Sema3d.1   | 0 | 1.442  | 0.678 | 0.229 | 0 | Preadipocytes_1 |
| Aspn.1     | 0 | 1.435  | 0.711 | 0.29  | 0 | Preadipocytes_1 |
| Igfbp6.1   | 0 | 1.427  | 0.664 | 0.135 | 0 | Preadipocytes_1 |
| Cdh9.1     | 0 | 1.412  | 0.701 | 0.376 | 0 | Preadipocytes_1 |
| Pcdh19.1   | 0 | 1.357  | 0.754 | 0.456 | 0 | Preadipocytes_1 |
| Ly6a.1     | 0 | 1.336  | 0.674 | 0.207 | 0 | Preadipocytes_1 |
| C1qtnf7.1  | 0 | 1.328  | 0.659 | 0.399 | 0 | Preadipocytes_1 |
| Sdc2.1     | 0 | 1.326  | 0.725 | 0.528 | 0 | Preadipocytes_1 |
| Cd248.1    | 0 | 1.277  | 0.592 | 0.112 | 0 | Preadipocytes_1 |
| Aebp1.1    | 0 | 1.276  | 0.656 | 0.172 | 0 | Preadipocytes_1 |
| Efna5.1    | 0 | 1.264  | 0.836 | 0.57  | 0 | Preadipocytes_1 |
| Gabra3.1   | 0 | 1.236  | 0.760 | 0.453 | 0 | Preadipocytes_1 |
| Prss23.1   | 0 | 1.235  | 0.572 | 0.113 | 0 | Preadipocytes_1 |
| Pde10a.1   | 0 | 1.214  | 0.639 | 0.307 | 0 | Preadipocytes_1 |
| Pcsk5      | 0 | 1.179  | 0.784 | 0.566 | 0 | Preadipocytes_1 |
| Postn.1    | 0 | 1.149  | 0.733 | 0.306 | 0 | Preadipocytes_1 |
| Fbln2.1    | 0 | 1.086  | 0.711 | 0.356 | 0 | Preadipocytes_1 |
| Abca8a.1   | 0 | 1.044  | 0.814 | 0.504 | 0 | Preadipocytes_1 |
| Il1r2.1    | 0 | 1.033  | 0.555 | 0.152 | 0 | Preadipocytes_1 |
| Dclk1.1    | 0 | 1.011  | 0.780 | 0.536 | 0 | Preadipocytes_1 |
| Timp3.1    | 0 | 0.971  | 0.684 | 0.354 | 0 | Preadipocytes_1 |
| Anxa1      | 0 | 0.897  | 0.800 | 0.505 | 0 | Preadipocytes_1 |
| Col1a2.1   | 0 | 0.857  | 0.936 | 0.512 | 0 | Preadipocytes_1 |
| Mid1.1     | 0 | 0.797  | 0.946 | 0.607 | 0 | Preadipocytes_1 |
| Lama4.1    | 0 | 0.788  | 0.920 | 0.546 | 0 | Preadipocytes_1 |
| Tead1.1    | 0 | 0.783  | 0.861 | 0.597 | 0 | Preadipocytes_1 |
| Itih5.1    | 0 | 0.772  | 0.774 | 0.453 | 0 | Preadipocytes_1 |
| Col3a1.1   | 0 | 0.764  | 0.977 | 0.644 | 0 | Preadipocytes_1 |
| Gabre.1    | 0 | 0.762  | 0.582 | 0.265 | 0 | Preadipocytes_1 |
| Sparc      | 0 | 0.751  | 0.801 | 0.478 | 0 | Preadipocytes_1 |
| Sult1e1.1  | 0 | 0.684  | 0.564 | 0.198 | 0 | Preadipocytes_1 |
| Dst.1      | 0 | 0.622  | 0.938 | 0.551 | 0 | Preadipocytes_1 |
| Spock3     | 0 | 0.621  | 0.474 | 0.082 | 0 | Preadipocytes_1 |
| Sfrp4.1    | 0 | 0.620  | 0.588 | 0.171 | 0 | Preadipocytes_1 |
| Tbc1d8     | 0 | -0.501 | 0.073 | 0.416 | 0 | Preadipocytes_1 |
| Dpf3.1     | 0 | -0.514 | 0.120 | 0.482 | 0 | Preadipocytes_1 |
| Scd1.1     | 0 | -0.525 | 0.032 | 0.311 | 0 | Preadipocytes_1 |
| Lair1      | 0 | -0.531 | 0.001 | 0.462 | 0 | Preadipocytes_1 |

|            |   |        |       |       |   |                 |
|------------|---|--------|-------|-------|---|-----------------|
| Efr3b      | 0 | -0.550 | 0.030 | 0.452 | 0 | Preadipocytes_1 |
| Myo10      | 0 | -0.598 | 0.109 | 0.52  | 0 | Preadipocytes_1 |
| Rasgrp3    | 0 | -0.602 | 0.013 | 0.484 | 0 | Preadipocytes_1 |
| Hck        | 0 | -0.606 | 0.001 | 0.443 | 0 | Preadipocytes_1 |
| Naa50      | 0 | -0.612 | 0.108 | 0.494 | 0 | Preadipocytes_1 |
| Hgf        | 0 | -0.626 | 0.138 | 0.63  | 0 | Preadipocytes_1 |
| Slc22a23.1 | 0 | -0.629 | 0.017 | 0.513 | 0 | Preadipocytes_1 |
| Mical2     | 0 | -0.631 | 0.170 | 0.558 | 0 | Preadipocytes_1 |
| Smc4       | 0 | -0.633 | 0.136 | 0.534 | 0 | Preadipocytes_1 |
| P2ry12     | 0 | -0.654 | 0.027 | 0.515 | 0 | Preadipocytes_1 |
| Gm5150     | 0 | -0.677 | 0.001 | 0.425 | 0 | Preadipocytes_1 |
| Klf8       | 0 | -0.687 | 0.015 | 0.516 | 0 | Preadipocytes_1 |
| Ms4a4a     | 0 | -0.689 | 0.040 | 0.523 | 0 | Preadipocytes_1 |
| Ptchd1     | 0 | -0.707 | 0.008 | 0.454 | 0 | Preadipocytes_1 |
| Peg3.1     | 0 | -0.711 | 0.122 | 0.307 | 0 | Preadipocytes_1 |
| Gcnt1      | 0 | -0.735 | 0.001 | 0.484 | 0 | Preadipocytes_1 |
| Nlrc5.1    | 0 | -0.736 | 0.061 | 0.574 | 0 | Preadipocytes_1 |
| Rel        | 0 | -0.738 | 0.033 | 0.428 | 0 | Preadipocytes_1 |
| Zranb3     | 0 | -0.740 | 0.089 | 0.417 | 0 | Preadipocytes_1 |
| Il7r.1     | 0 | -0.756 | 0.001 | 0.396 | 0 | Preadipocytes_1 |
| Lilr4b.1   | 0 | -0.758 | 0.001 | 0.459 | 0 | Preadipocytes_1 |
| C5ar1.1    | 0 | -0.771 | 0.000 | 0.462 | 0 | Preadipocytes_1 |
| Slc5a3.1   | 0 | -0.773 | 0.022 | 0.486 | 0 | Preadipocytes_1 |
| Card11     | 0 | -0.781 | 0.009 | 0.463 | 0 | Preadipocytes_1 |
| Nrg2       | 0 | -0.795 | 0.086 | 0.55  | 0 | Preadipocytes_1 |
| Cgnl1.1    | 0 | -0.806 | 0.090 | 0.531 | 0 | Preadipocytes_1 |
| Rin2.1     | 0 | -0.817 | 0.516 | 0.816 | 0 | Preadipocytes_1 |
| Tcirg1     | 0 | -0.828 | 0.081 | 0.459 | 0 | Preadipocytes_1 |
| Soat1.1    | 0 | -0.829 | 0.080 | 0.437 | 0 | Preadipocytes_1 |
| Prune2     | 0 | -0.831 | 0.054 | 0.602 | 0 | Preadipocytes_1 |
| Mctp2      | 0 | -0.841 | 0.020 | 0.513 | 0 | Preadipocytes_1 |
| Fnbp1l.1   | 0 | -0.851 | 0.060 | 0.537 | 0 | Preadipocytes_1 |
| Ms4a7.1    | 0 | -0.859 | 0.002 | 0.565 | 0 | Preadipocytes_1 |
| Zbtb7c.1   | 0 | -0.882 | 0.162 | 0.622 | 0 | Preadipocytes_1 |
| Slc7a8     | 0 | -0.889 | 0.040 | 0.552 | 0 | Preadipocytes_1 |
| Grk3       | 0 | -0.890 | 0.037 | 0.481 | 0 | Preadipocytes_1 |
| Ms4a6b.1   | 0 | -0.893 | 0.007 | 0.527 | 0 | Preadipocytes_1 |
| Sort1.1    | 0 | -0.894 | 0.001 | 0.501 | 0 | Preadipocytes_1 |
| Sh3pxd2a.1 | 0 | -0.908 | 0.187 | 0.676 | 0 | Preadipocytes_1 |
| Plxnc1.1   | 0 | -0.908 | 0.007 | 0.486 | 0 | Preadipocytes_1 |
| Hexa.1     | 0 | -0.909 | 0.143 | 0.499 | 0 | Preadipocytes_1 |
| P2rx7.1    | 0 | -0.922 | 0.071 | 0.549 | 0 | Preadipocytes_1 |
| Cd300lb.1  | 0 | -0.924 | 0.004 | 0.491 | 0 | Preadipocytes_1 |
| Msr1.1     | 0 | -0.925 | 0.002 | 0.544 | 0 | Preadipocytes_1 |
| Pag1.1     | 0 | -0.937 | 0.068 | 0.581 | 0 | Preadipocytes_1 |
| Calm2      | 0 | -0.942 | 0.174 | 0.557 | 0 | Preadipocytes_1 |
| Nos1ap.1   | 0 | -0.946 | 0.139 | 0.628 | 0 | Preadipocytes_1 |
| Pla2g7.1   | 0 | -0.954 | 0.000 | 0.482 | 0 | Preadipocytes_1 |
| Chd7.1     | 0 | -0.958 | 0.028 | 0.53  | 0 | Preadipocytes_1 |
| Tmem106a.1 | 0 | -0.960 | 0.065 | 0.531 | 0 | Preadipocytes_1 |
| Ripor2.1   | 0 | -0.973 | 0.066 | 0.527 | 0 | Preadipocytes_1 |
| Mpp1       | 0 | -0.989 | 0.066 | 0.571 | 0 | Preadipocytes_1 |
| Ccr5.1     | 0 | -0.990 | 0.009 | 0.477 | 0 | Preadipocytes_1 |
| Gas2l3.1   | 0 | -0.992 | 0.002 | 0.553 | 0 | Preadipocytes_1 |
| Gm.1       | 0 | -0.993 | 0.102 | 0.473 | 0 | Preadipocytes_1 |
| Pacrg.1    | 0 | -1.006 | 0.147 | 0.536 | 0 | Preadipocytes_1 |
| Lpin1.1    | 0 | -1.037 | 0.053 | 0.511 | 0 | Preadipocytes_1 |
| Hpgds      | 0 | -1.061 | 0.002 | 0.612 | 0 | Preadipocytes_1 |
| Trim25.1   | 0 | -1.071 | 0.127 | 0.621 | 0 | Preadipocytes_1 |
| Nceh1      | 0 | -1.078 | 0.080 | 0.478 | 0 | Preadipocytes_1 |
| Atp6v1a    | 0 | -1.092 | 0.130 | 0.636 | 0 | Preadipocytes_1 |
| Insyn2b.1  | 0 | -1.112 | 0.050 | 0.569 | 0 | Preadipocytes_1 |

|             |   |        |       |       |   |                 |
|-------------|---|--------|-------|-------|---|-----------------|
| Tank.1      | 0 | -1.113 | 0.300 | 0.774 | 0 | Preadipocytes_1 |
| Rnf149      | 0 | -1.115 | 0.045 | 0.566 | 0 | Preadipocytes_1 |
| Palld.1     | 0 | -1.122 | 0.286 | 0.669 | 0 | Preadipocytes_1 |
| Gramd1b     | 0 | -1.122 | 0.044 | 0.596 | 0 | Preadipocytes_1 |
| Cdk6.1      | 0 | -1.125 | 0.252 | 0.594 | 0 | Preadipocytes_1 |
| Fggy.1      | 0 | -1.139 | 0.100 | 0.669 | 0 | Preadipocytes_1 |
| Cd300a.1    | 0 | -1.152 | 0.002 | 0.503 | 0 | Preadipocytes_1 |
| Spi1.1      | 0 | -1.153 | 0.001 | 0.536 | 0 | Preadipocytes_1 |
| Ank         | 0 | -1.164 | 0.138 | 0.643 | 0 | Preadipocytes_1 |
| Mafb.1      | 0 | -1.173 | 0.003 | 0.474 | 0 | Preadipocytes_1 |
| Fat3.1      | 0 | -1.174 | 0.010 | 0.502 | 0 | Preadipocytes_1 |
| Ms4a6c.1    | 0 | -1.181 | 0.004 | 0.54  | 0 | Preadipocytes_1 |
| Noct.1      | 0 | -1.182 | 0.095 | 0.577 | 0 | Preadipocytes_1 |
| Itm2b       | 0 | -1.184 | 0.296 | 0.66  | 0 | Preadipocytes_1 |
| Atp6v1b2    | 0 | -1.187 | 0.234 | 0.674 | 0 | Preadipocytes_1 |
| Tspan12.1   | 0 | -1.191 | 0.088 | 0.292 | 0 | Preadipocytes_1 |
| Irak2.1     | 0 | -1.224 | 0.083 | 0.563 | 0 | Preadipocytes_1 |
| Cybb.1      | 0 | -1.238 | 0.001 | 0.485 | 0 | Preadipocytes_1 |
| Ednrb.1     | 0 | -1.246 | 0.063 | 0.532 | 0 | Preadipocytes_1 |
| Pik3r5.1    | 0 | -1.252 | 0.053 | 0.533 | 0 | Preadipocytes_1 |
| P3h2.1      | 0 | -1.262 | 0.064 | 0.577 | 0 | Preadipocytes_1 |
| Ptpn22.1    | 0 | -1.288 | 0.005 | 0.505 | 0 | Preadipocytes_1 |
| Aoah.1      | 0 | -1.298 | 0.067 | 0.621 | 0 | Preadipocytes_1 |
| Tec.1       | 0 | -1.302 | 0.021 | 0.598 | 0 | Preadipocytes_1 |
| Entpd1.1    | 0 | -1.311 | 0.132 | 0.628 | 0 | Preadipocytes_1 |
| Enpp2.1     | 0 | -1.322 | 0.204 | 0.393 | 0 | Preadipocytes_1 |
| Bank1.1     | 0 | -1.322 | 0.004 | 0.532 | 0 | Preadipocytes_1 |
| Plxna4.1    | 0 | -1.366 | 0.073 | 0.634 | 0 | Preadipocytes_1 |
| Ccl6.1      | 0 | -1.374 | 0.002 | 0.462 | 0 | Preadipocytes_1 |
| Aplp2.1     | 0 | -1.378 | 0.187 | 0.632 | 0 | Preadipocytes_1 |
| Nrp2.1      | 0 | -1.386 | 0.018 | 0.594 | 0 | Preadipocytes_1 |
| Mamdc2.1    | 0 | -1.398 | 0.077 | 0.523 | 0 | Preadipocytes_1 |
| Evl.1       | 0 | -1.405 | 0.009 | 0.525 | 0 | Preadipocytes_1 |
| Wdfy4.1     | 0 | -1.414 | 0.036 | 0.561 | 0 | Preadipocytes_1 |
| Tnfrsf11a.1 | 0 | -1.416 | 0.045 | 0.609 | 0 | Preadipocytes_1 |
| Ctss.1      | 0 | -1.435 | 0.000 | 0.483 | 0 | Preadipocytes_1 |
| Nckap1l.1   | 0 | -1.440 | 0.005 | 0.593 | 0 | Preadipocytes_1 |
| Arhgap25.1  | 0 | -1.472 | 0.004 | 0.545 | 0 | Preadipocytes_1 |
| Slc27a1.1   | 0 | -1.486 | 0.001 | 0.603 | 0 | Preadipocytes_1 |
| Sipa1l1.1   | 0 | -1.488 | 0.161 | 0.729 | 0 | Preadipocytes_1 |
| Prkch       | 0 | -1.493 | 0.009 | 0.613 | 0 | Preadipocytes_1 |
| Plekha7     | 0 | -1.505 | 0.052 | 0.636 | 0 | Preadipocytes_1 |
| Tns3        | 0 | -1.510 | 0.047 | 0.66  | 0 | Preadipocytes_1 |
| Kcnk13.1    | 0 | -1.511 | 0.069 | 0.626 | 0 | Preadipocytes_1 |
| Pfkfb3.1    | 0 | -1.513 | 0.013 | 0.587 | 0 | Preadipocytes_1 |
| Ehd4.1      | 0 | -1.531 | 0.035 | 0.608 | 0 | Preadipocytes_1 |
| Pik3ap1     | 0 | -1.531 | 0.004 | 0.671 | 0 | Preadipocytes_1 |
| Arid5b.1    | 0 | -1.543 | 0.370 | 0.822 | 0 | Preadipocytes_1 |
| Cacna1d.1   | 0 | -1.548 | 0.044 | 0.642 | 0 | Preadipocytes_1 |
| Atp8b4.1    | 0 | -1.567 | 0.004 | 0.53  | 0 | Preadipocytes_1 |
| Csf2ra.1    | 0 | -1.568 | 0.002 | 0.566 | 0 | Preadipocytes_1 |
| St18.1      | 0 | -1.584 | 0.012 | 0.603 | 0 | Preadipocytes_1 |
| Rasa1.1     | 0 | -1.610 | 0.369 | 0.841 | 0 | Preadipocytes_1 |
| Stab1.1     | 0 | -1.613 | 0.010 | 0.656 | 0 | Preadipocytes_1 |
| Fgf13.1     | 0 | -1.613 | 0.078 | 0.557 | 0 | Preadipocytes_1 |
| St8sia4.1   | 0 | -1.624 | 0.036 | 0.549 | 0 | Preadipocytes_1 |
| Cd200r1.1   | 0 | -1.626 | 0.027 | 0.592 | 0 | Preadipocytes_1 |
| Prkcb.1     | 0 | -1.648 | 0.012 | 0.639 | 0 | Preadipocytes_1 |
| Slc6a6      | 0 | -1.667 | 0.174 | 0.701 | 0 | Preadipocytes_1 |
| Hipk2.1     | 0 | -1.669 | 0.237 | 0.765 | 0 | Preadipocytes_1 |
| Lyz2.1      | 0 | -1.670 | 0.002 | 0.46  | 0 | Preadipocytes_1 |
| Atp6v0d2.1  | 0 | -1.677 | 0.014 | 0.581 | 0 | Preadipocytes_1 |

|            |           |        |       |       |           |                 |
|------------|-----------|--------|-------|-------|-----------|-----------------|
| Osbp18     | 0         | -1.704 | 0.442 | 0.86  | 0         | Preadipocytes_1 |
| Lgmn.1     | 0         | -1.705 | 0.014 | 0.606 | 0         | Preadipocytes_1 |
| Selenop.1  | 0         | -1.713 | 0.132 | 0.618 | 0         | Preadipocytes_1 |
| Cadm1.1    | 0         | -1.730 | 0.016 | 0.55  | 0         | Preadipocytes_1 |
| Specc1.1   | 0         | -1.734 | 0.085 | 0.687 | 0         | Preadipocytes_1 |
| Ubash3b.1  | 0         | -1.758 | 0.089 | 0.611 | 0         | Preadipocytes_1 |
| Cpeb4.1    | 0         | -1.777 | 0.181 | 0.745 | 0         | Preadipocytes_1 |
| Clec10a.1  | 0         | -1.782 | 0.004 | 0.616 | 0         | Preadipocytes_1 |
| Itga4.1    | 0         | -1.792 | 0.042 | 0.559 | 0         | Preadipocytes_1 |
| Tsc22d3.1  | 0         | -1.798 | 0.167 | 0.659 | 0         | Preadipocytes_1 |
| Cd44.1     | 0         | -1.799 | 0.204 | 0.606 | 0         | Preadipocytes_1 |
| Blk.1      | 0         | -1.844 | 0.034 | 0.649 | 0         | Preadipocytes_1 |
| Adap2      | 0         | -1.895 | 0.066 | 0.762 | 0         | Preadipocytes_1 |
| Shtn1.1    | 0         | -1.901 | 0.005 | 0.651 | 0         | Preadipocytes_1 |
| Mertk      | 0         | -1.905 | 0.126 | 0.745 | 0         | Preadipocytes_1 |
| Igf1.1     | 0         | -1.908 | 0.107 | 0.795 | 0         | Preadipocytes_1 |
| Slc16a10.1 | 0         | -1.958 | 0.144 | 0.762 | 0         | Preadipocytes_1 |
| Cd163.1    | 0         | -1.973 | 0.074 | 0.579 | 0         | Preadipocytes_1 |
| Plin2      | 0         | -2.025 | 0.015 | 0.672 | 0         | Preadipocytes_1 |
| Abhd12.1   | 0         | -2.028 | 0.104 | 0.739 | 0         | Preadipocytes_1 |
| Pltp       | 0         | -2.032 | 0.007 | 0.608 | 0         | Preadipocytes_1 |
| Atp6v0a1.1 | 0         | -2.036 | 0.232 | 0.816 | 0         | Preadipocytes_1 |
| Ctsb.1     | 0         | -2.060 | 0.096 | 0.598 | 0         | Preadipocytes_1 |
| Lcp1.1     | 0         | -2.065 | 0.002 | 0.641 | 0         | Preadipocytes_1 |
| Epsti1.1   | 0         | -2.076 | 0.014 | 0.661 | 0         | Preadipocytes_1 |
| Cd84.1     | 0         | -2.087 | 0.008 | 0.644 | 0         | Preadipocytes_1 |
| Pitpnc1.1  | 0         | -2.106 | 0.408 | 0.842 | 0         | Preadipocytes_1 |
| Cfh.1      | 0         | -2.119 | 0.174 | 0.697 | 0         | Preadipocytes_1 |
| Ahcy12.1   | 0         | -2.150 | 0.213 | 0.791 | 0         | Preadipocytes_1 |
| Ctsc       | 0         | -2.186 | 0.053 | 0.652 | 0         | Preadipocytes_1 |
| Adgre1.1   | 0         | -2.249 | 0.038 | 0.673 | 0         | Preadipocytes_1 |
| Bcar3.1    | 0         | -2.288 | 0.011 | 0.58  | 0         | Preadipocytes_1 |
| Rbm47.1    | 0         | -2.462 | 0.061 | 0.79  | 0         | Preadipocytes_1 |
| Myo1f.1    | 0         | -2.491 | 0.005 | 0.71  | 0         | Preadipocytes_1 |
| Fyb.1      | 0         | -2.494 | 0.060 | 0.705 | 0         | Preadipocytes_1 |
| Pde4d.1    | 0         | -2.524 | 0.177 | 0.819 | 0         | Preadipocytes_1 |
| Apobec1    | 0         | -2.548 | 0.069 | 0.718 | 0         | Preadipocytes_1 |
| Plcb1.1    | 0         | -2.579 | 0.310 | 0.684 | 0         | Preadipocytes_1 |
| Psap.1     | 0         | -2.708 | 0.164 | 0.66  | 0         | Preadipocytes_1 |
| Lpl.1      | 0         | -2.720 | 0.277 | 0.687 | 0         | Preadipocytes_1 |
| Mtss1      | 0         | -2.817 | 0.085 | 0.812 | 0         | Preadipocytes_1 |
| Fry.1      | 0         | -2.837 | 0.131 | 0.64  | 0         | Preadipocytes_1 |
| Pparg.1    | 0         | -2.843 | 0.318 | 0.696 | 0         | Preadipocytes_1 |
| Hdac9      | 0         | -2.873 | 0.065 | 0.726 | 0         | Preadipocytes_1 |
| Pde3b.1    | 0         | -2.955 | 0.092 | 0.759 | 0         | Preadipocytes_1 |
| Apoe.1     | 0         | -3.214 | 0.064 | 0.676 | 0         | Preadipocytes_1 |
| Alcam      | 0         | -3.566 | 0.046 | 0.71  | 0         | Preadipocytes_1 |
| Cd36.1     | 0         | -3.750 | 0.056 | 0.786 | 0         | Preadipocytes_1 |
| F13a1      | 0         | -3.782 | 0.117 | 0.731 | 0         | Preadipocytes_1 |
| Sbsn       | 5.47E-307 | 1.044  | 0.471 | 0.069 | 1.09E-303 | Preadipocytes_1 |
| Elk.1      | 6.39E-306 | 0.795  | 0.702 | 0.43  | 1.28E-302 | Preadipocytes_1 |
| Col8a1.1   | 1.09E-305 | 0.789  | 0.566 | 0.289 | 2.18E-302 | Preadipocytes_1 |
| Nabp1.1    | 1.70E-299 | -0.885 | 0.003 | 0.48  | 3.39E-296 | Preadipocytes_1 |
| Sirpa.1    | 2.57E-299 | -1.125 | 0.274 | 0.576 | 5.14E-296 | Preadipocytes_1 |
| Cd180.1    | 1.21E-295 | -1.018 | 0.002 | 0.444 | 2.42E-292 | Preadipocytes_1 |
| Aldh1a1.1  | 7.81E-295 | 0.522  | 0.893 | 0.668 | 1.56E-291 | Preadipocytes_1 |
| Cobll1.1   | 9.17E-295 | -1.231 | 0.167 | 0.539 | 1.83E-291 | Preadipocytes_1 |
| Slc37a2    | 2.42E-292 | -0.650 | 0.001 | 0.432 | 4.84E-289 | Preadipocytes_1 |
| Nav2.1     | 3.97E-292 | -0.813 | 0.213 | 0.515 | 7.94E-289 | Preadipocytes_1 |
| Grm7       | 2.72E-291 | 0.617  | 0.436 | 0.136 | 5.45E-288 | Preadipocytes_1 |
| Gas6.1     | 5.63E-290 | -1.032 | 0.202 | 0.548 | 1.13E-286 | Preadipocytes_1 |
| Gnai1.1    | 4.00E-289 | -1.019 | 0.008 | 0.264 | 8.00E-286 | Preadipocytes_1 |



|            |           |        |       |       |           |                 |
|------------|-----------|--------|-------|-------|-----------|-----------------|
| Foxp2.1    | 1.04E-288 | 0.750  | 0.529 | 0.199 | 2.08E-285 | Preadipocytes_1 |
| Ppp2r2b.1  | 4.52E-287 | 1.884  | 0.618 | 0.362 | 9.04E-284 | Preadipocytes_1 |
| Cotl1.1    | 8.48E-287 | -0.818 | 0.053 | 0.424 | 1.70E-283 | Preadipocytes_1 |
| Aff2       | 1.37E-285 | 0.669  | 0.657 | 0.35  | 2.74E-282 | Preadipocytes_1 |
| C3ar1      | 3.21E-285 | -0.651 | 0.000 | 0.411 | 6.42E-282 | Preadipocytes_1 |
| Ngf.1      | 7.78E-284 | 0.957  | 0.544 | 0.22  | 1.56E-280 | Preadipocytes_1 |
| Lgals3.1   | 2.72E-280 | -1.834 | 0.002 | 0.434 | 5.44E-277 | Preadipocytes_1 |
| Adipor2.1  | 8.98E-279 | -1.790 | 0.093 | 0.491 | 1.80E-275 | Preadipocytes_1 |
| Sorbs1.1   | 1.88E-278 | -3.102 | 0.154 | 0.355 | 3.76E-275 | Preadipocytes_1 |
| Tenm4.1    | 3.94E-278 | -3.514 | 0.076 | 0.543 | 7.88E-275 | Preadipocytes_1 |
| Galnt17.1  | 2.29E-276 | 0.727  | 0.722 | 0.508 | 4.59E-273 | Preadipocytes_1 |
| mt-Nd6.1   | 8.45E-276 | -0.913 | 0.499 | 0.768 | 1.69E-272 | Preadipocytes_1 |
| Tshr.1     | 1.32E-275 | -1.990 | 0.001 | 0.275 | 2.65E-272 | Preadipocytes_1 |
| Ptpre      | 1.17E-272 | -1.125 | 0.005 | 0.512 | 2.35E-269 | Preadipocytes_1 |
| Cd86       | 4.86E-272 | -0.739 | 0.019 | 0.458 | 9.72E-269 | Preadipocytes_1 |
| Ptprg.1    | 1.72E-269 | 0.574  | 0.889 | 0.604 | 3.43E-266 | Preadipocytes_1 |
| Sox6.1     | 4.40E-268 | -0.900 | 0.001 | 0.295 | 8.79E-265 | Preadipocytes_1 |
| St6galnac3 | 2.97E-266 | -0.661 | 0.039 | 0.392 | 5.93E-263 | Preadipocytes_1 |
| Gbe1.1     | 2.15E-264 | -0.642 | 0.337 | 0.658 | 4.29E-261 | Preadipocytes_1 |
| Col4a5.1   | 7.81E-260 | 0.889  | 0.634 | 0.423 | 1.56E-256 | Preadipocytes_1 |
| Larp1b.1   | 1.79E-257 | -0.734 | 0.200 | 0.519 | 3.59E-254 | Preadipocytes_1 |
| B4galt5.1  | 9.94E-257 | -0.732 | 0.341 | 0.628 | 1.99E-253 | Preadipocytes_1 |
| Nedd4l.1   | 9.66E-256 | -1.228 | 0.498 | 0.765 | 1.93E-252 | Preadipocytes_1 |
| Dock5      | 2.03E-254 | -0.611 | 0.172 | 0.459 | 4.05E-251 | Preadipocytes_1 |
| Itga6.1    | 3.11E-254 | -0.504 | 0.000 | 0.37  | 6.21E-251 | Preadipocytes_1 |
| Slc25a13   | 4.71E-252 | -0.637 | 0.134 | 0.415 | 9.43E-249 | Preadipocytes_1 |
| Abca8b.1   | 8.48E-250 | 0.957  | 0.640 | 0.382 | 1.70E-246 | Preadipocytes_1 |
| Nrg4.1     | 9.59E-249 | -1.420 | 0.001 | 0.272 | 1.92E-245 | Preadipocytes_1 |
| Dtna       | 5.18E-248 | 1.127  | 0.533 | 0.285 | 1.04E-244 | Preadipocytes_1 |
| Tmem165    | 8.72E-247 | -0.510 | 0.319 | 0.651 | 1.74E-243 | Preadipocytes_1 |
| Atp1a1.1   | 1.50E-245 | -0.611 | 0.090 | 0.374 | 2.99E-242 | Preadipocytes_1 |
| Lyve1.1    | 4.61E-245 | -0.796 | 0.001 | 0.365 | 9.22E-242 | Preadipocytes_1 |
| Pdzrn3.1   | 1.86E-244 | -1.213 | 0.306 | 0.497 | 3.73E-241 | Preadipocytes_1 |
| Myl1.1     | 1.00E-243 | -1.116 | 0.001 | 0.275 | 2.01E-240 | Preadipocytes_1 |
| Lipa       | 1.08E-243 | -1.126 | 0.037 | 0.409 | 2.17E-240 | Preadipocytes_1 |
| Pdzd2.1    | 7.28E-243 | 0.893  | 0.720 | 0.459 | 1.46E-239 | Preadipocytes_1 |
| Pik3cb.1   | 4.44E-242 | -0.928 | 0.002 | 0.49  | 8.88E-239 | Preadipocytes_1 |
| Lhfp12.1   | 4.34E-240 | -0.843 | 0.277 | 0.53  | 8.68E-237 | Preadipocytes_1 |
| Oxct1.1    | 5.18E-235 | -0.688 | 0.275 | 0.606 | 1.04E-231 | Preadipocytes_1 |
| Cachd1.1   | 1.25E-227 | 0.648  | 0.745 | 0.496 | 2.50E-224 | Preadipocytes_1 |
| Adgre4.1   | 1.59E-225 | -0.908 | 0.001 | 0.402 | 3.19E-222 | Preadipocytes_1 |
| Celf4      | 4.93E-225 | -0.707 | 0.018 | 0.451 | 9.86E-222 | Preadipocytes_1 |
| Akr1a1     | 5.11E-223 | -0.648 | 0.166 | 0.466 | 1.02E-219 | Preadipocytes_1 |
| Calcr1.1   | 6.00E-223 | 1.302  | 0.725 | 0.619 | 1.20E-219 | Preadipocytes_1 |
| Ctsd       | 4.41E-222 | -1.263 | 0.044 | 0.404 | 8.83E-219 | Preadipocytes_1 |
| Abcg3.1    | 2.17E-221 | -0.896 | 0.001 | 0.439 | 4.34E-218 | Preadipocytes_1 |
| Cd9.1      | 6.28E-219 | -0.510 | 0.138 | 0.375 | 1.26E-215 | Preadipocytes_1 |
| Grb14.1    | 6.74E-219 | -1.128 | 0.120 | 0.386 | 1.35E-215 | Preadipocytes_1 |
| Dlg2.1     | 1.75E-218 | 0.760  | 0.642 | 0.392 | 3.50E-215 | Preadipocytes_1 |
| Tmem45b.1  | 2.82E-218 | -1.850 | 0.002 | 0.285 | 5.64E-215 | Preadipocytes_1 |
| Itpr1.1    | 6.13E-216 | -0.919 | 0.425 | 0.679 | 1.23E-212 | Preadipocytes_1 |
| Clec4a2    | 9.30E-216 | -0.615 | 0.000 | 0.377 | 1.86E-212 | Preadipocytes_1 |
| Adra1a.1   | 1.16E-215 | -0.533 | 0.108 | 0.37  | 2.32E-212 | Preadipocytes_1 |
| Eepd1.1    | 1.31E-215 | -1.667 | 0.037 | 0.499 | 2.62E-212 | Preadipocytes_1 |
| Npr3.1     | 1.85E-214 | -2.641 | 0.018 | 0.269 | 3.71E-211 | Preadipocytes_1 |
| Skap1.1    | 2.11E-211 | -0.664 | 0.029 | 0.336 | 4.22E-208 | Preadipocytes_1 |
| Pde1a.1    | 1.60E-209 | 0.597  | 0.674 | 0.423 | 3.21E-206 | Preadipocytes_1 |
| Ctsz       | 4.42E-207 | -0.607 | 0.091 | 0.375 | 8.85E-204 | Preadipocytes_1 |
| Rgs1       | 2.26E-205 | -0.575 | 0.001 | 0.327 | 4.51E-202 | Preadipocytes_1 |
| Cnnm2.1    | 1.02E-204 | -0.737 | 0.437 | 0.662 | 2.05E-201 | Preadipocytes_1 |
| Ncf1       | 1.11E-204 | -0.742 | 0.001 | 0.405 | 2.23E-201 | Preadipocytes_1 |
| Dact2.1    | 1.05E-202 | 1.328  | 0.481 | 0.166 | 2.10E-199 | Preadipocytes_1 |

|            |           |        |       |       |           |                 |
|------------|-----------|--------|-------|-------|-----------|-----------------|
| Arhgap29.1 | 5.39E-201 | 0.566  | 0.746 | 0.48  | 1.08E-197 | Preadipocytes_1 |
| Dmd.1      | 1.97E-199 | 0.502  | 0.711 | 0.483 | 3.94E-196 | Preadipocytes_1 |
| Pde7b.1    | 1.44E-196 | -0.899 | 0.680 | 0.828 | 2.88E-193 | Preadipocytes_1 |
| Cav1.1     | 3.97E-196 | -1.666 | 0.022 | 0.278 | 7.95E-193 | Preadipocytes_1 |
| Col4a1.1   | 3.77E-195 | -1.275 | 0.399 | 0.571 | 7.54E-192 | Preadipocytes_1 |
| Retnla.1   | 4.38E-194 | -1.927 | 0.002 | 0.398 | 8.75E-191 | Preadipocytes_1 |
| Adamtsl3.1 | 1.05E-192 | 1.099  | 0.586 | 0.385 | 2.09E-189 | Preadipocytes_1 |
| C1qa.1     | 2.02E-192 | -1.346 | 0.002 | 0.406 | 4.03E-189 | Preadipocytes_1 |
| Enah       | 5.96E-192 | 0.781  | 0.510 | 0.239 | 1.19E-188 | Preadipocytes_1 |
| Clec12a    | 8.65E-192 | -0.696 | 0.001 | 0.383 | 1.73E-188 | Preadipocytes_1 |
| Nipa2.1    | 1.14E-191 | 1.181  | 0.520 | 0.214 | 2.29E-188 | Preadipocytes_1 |
| Pou2f2     | 2.76E-191 | -0.669 | 0.031 | 0.411 | 5.51E-188 | Preadipocytes_1 |
| Stap1      | 1.27E-190 | -0.670 | 0.000 | 0.383 | 2.53E-187 | Preadipocytes_1 |
| Fgf10.1    | 3.44E-190 | -1.014 | 0.275 | 0.399 | 6.89E-187 | Preadipocytes_1 |
| Map1b.1    | 3.20E-189 | 0.614  | 0.541 | 0.244 | 6.40E-186 | Preadipocytes_1 |
| Mmp12      | 3.99E-189 | -0.903 | 0.000 | 0.293 | 7.98E-186 | Preadipocytes_1 |
| Cidec.1    | 3.60E-188 | -2.058 | 0.002 | 0.251 | 7.21E-185 | Preadipocytes_1 |
| Mycbp2.1   | 3.05E-186 | -1.369 | 0.754 | 0.89  | 6.10E-183 | Preadipocytes_1 |
| Anxa2.1    | 7.16E-185 | -1.036 | 0.354 | 0.599 | 1.43E-181 | Preadipocytes_1 |
| C1qb.1     | 2.32E-184 | -1.190 | 0.036 | 0.401 | 4.65E-181 | Preadipocytes_1 |
| Por.1      | 5.99E-184 | -0.983 | 0.158 | 0.482 | 1.20E-180 | Preadipocytes_1 |
| Slc11a1    | 4.11E-183 | -0.628 | 0.001 | 0.379 | 8.21E-180 | Preadipocytes_1 |
| Tnip3      | 8.91E-183 | -0.819 | 0.001 | 0.349 | 1.78E-179 | Preadipocytes_1 |
| Smoc1.1    | 9.45E-183 | -1.323 | 0.001 | 0.259 | 1.89E-179 | Preadipocytes_1 |
| Tmem135.1  | 1.68E-180 | -1.476 | 0.407 | 0.677 | 3.36E-177 | Preadipocytes_1 |
| Kctd12.1   | 2.75E-179 | -0.781 | 0.004 | 0.38  | 5.51E-176 | Preadipocytes_1 |
| Gabra2     | 2.30E-178 | 0.847  | 0.398 | 0.086 | 4.61E-175 | Preadipocytes_1 |
| Ipcef1     | 8.13E-178 | -0.568 | 0.001 | 0.347 | 1.63E-174 | Preadipocytes_1 |
| Coro2a     | 2.12E-175 | -0.735 | 0.016 | 0.423 | 4.23E-172 | Preadipocytes_1 |
| Sik2.1     | 3.75E-175 | -1.559 | 0.423 | 0.704 | 7.50E-172 | Preadipocytes_1 |
| Prr16.1    | 4.20E-175 | -1.559 | 0.309 | 0.426 | 8.39E-172 | Preadipocytes_1 |
| Neto1      | 1.73E-174 | 0.612  | 0.414 | 0.133 | 3.46E-171 | Preadipocytes_1 |
| Lamp1      | 3.34E-173 | -0.501 | 0.174 | 0.436 | 6.67E-170 | Preadipocytes_1 |
| Nxn        | 3.42E-172 | -0.505 | 0.297 | 0.514 | 6.83E-169 | Preadipocytes_1 |
| Fam78b     | 2.58E-168 | -0.760 | 0.382 | 0.587 | 5.16E-165 | Preadipocytes_1 |
| Ftl1.1     | 3.19E-168 | -0.855 | 0.092 | 0.392 | 6.37E-165 | Preadipocytes_1 |
| Irf8       | 1.04E-167 | -0.563 | 0.001 | 0.378 | 2.08E-164 | Preadipocytes_1 |
| Col15a1.1  | 2.40E-167 | -1.127 | 0.273 | 0.44  | 4.80E-164 | Preadipocytes_1 |
| Cfp.1      | 2.64E-167 | -0.773 | 0.000 | 0.369 | 5.29E-164 | Preadipocytes_1 |
| Tll1       | 2.68E-164 | 0.616  | 0.416 | 0.13  | 5.36E-161 | Preadipocytes_1 |
| Nnat.1     | 6.93E-164 | -1.644 | 0.056 | 0.272 | 1.39E-160 | Preadipocytes_1 |
| Igsf6      | 1.78E-163 | -0.537 | 0.001 | 0.402 | 3.56E-160 | Preadipocytes_1 |
| C9orf72.1  | 3.22E-161 | -0.986 | 0.050 | 0.396 | 6.45E-158 | Preadipocytes_1 |
| Dok2       | 4.83E-161 | -0.717 | 0.000 | 0.387 | 9.66E-158 | Preadipocytes_1 |
| Anxa5.1    | 8.29E-160 | -0.505 | 0.149 | 0.429 | 1.66E-156 | Preadipocytes_1 |
| Clec4b1    | 2.78E-158 | -0.632 | 0.001 | 0.361 | 5.56E-155 | Preadipocytes_1 |
| Abcg1      | 2.66E-157 | -0.760 | 0.002 | 0.431 | 5.31E-154 | Preadipocytes_1 |
| Ccl9       | 7.73E-157 | -0.632 | 0.000 | 0.368 | 1.55E-153 | Preadipocytes_1 |
| Fnip2.1    | 4.49E-155 | -0.932 | 0.640 | 0.788 | 8.97E-152 | Preadipocytes_1 |
| Gpc3.1     | 8.63E-155 | 0.814  | 0.573 | 0.369 | 1.73E-151 | Preadipocytes_1 |
| Fcer1g     | 1.59E-154 | -0.628 | 0.000 | 0.357 | 3.18E-151 | Preadipocytes_1 |
| Ly6e       | 2.68E-153 | -0.630 | 0.153 | 0.331 | 5.35E-150 | Preadipocytes_1 |
| Slc25a21.1 | 4.96E-153 | 0.702  | 0.464 | 0.202 | 9.92E-150 | Preadipocytes_1 |
| Malt1      | 1.64E-152 | -0.688 | 0.308 | 0.547 | 3.29E-149 | Preadipocytes_1 |
| Ccr2.1     | 1.97E-152 | -1.430 | 0.001 | 0.362 | 3.94E-149 | Preadipocytes_1 |
| Cst3.1     | 2.73E-152 | -0.835 | 0.121 | 0.391 | 5.46E-149 | Preadipocytes_1 |
| Gask1b.1   | 3.51E-152 | -0.780 | 0.356 | 0.566 | 7.01E-149 | Preadipocytes_1 |
| Ntrk3      | 5.29E-152 | 0.689  | 0.502 | 0.262 | 1.06E-148 | Preadipocytes_1 |
| Slc2a13.1  | 7.71E-152 | 0.663  | 0.637 | 0.417 | 1.54E-148 | Preadipocytes_1 |
| Rgs18      | 4.35E-151 | -0.517 | 0.001 | 0.37  | 8.71E-148 | Preadipocytes_1 |
| Ctsl.1     | 1.44E-150 | -0.669 | 0.178 | 0.37  | 2.87E-147 | Preadipocytes_1 |
| Nrcam      | 4.73E-150 | 0.726  | 0.510 | 0.308 | 9.46E-147 | Preadipocytes_1 |

|              |           |        |       |       |           |                 |
|--------------|-----------|--------|-------|-------|-----------|-----------------|
| Thsd4.1      | 6.52E-149 | -0.589 | 0.151 | 0.332 | 1.30E-145 | Preadipocytes_1 |
| 2810004N23Ri | 2.37E-148 | -0.758 | 0.098 | 0.386 | 4.74E-145 | Preadipocytes_1 |
| Trf          | 2.47E-148 | -0.702 | 0.034 | 0.363 | 4.95E-145 | Preadipocytes_1 |
| Bcl2.1       | 5.57E-147 | -0.854 | 0.484 | 0.679 | 1.11E-143 | Preadipocytes_1 |
| Adam8        | 1.86E-146 | -0.621 | 0.000 | 0.324 | 3.72E-143 | Preadipocytes_1 |
| Negr1.1      | 9.79E-145 | 0.658  | 0.822 | 0.733 | 1.96E-141 | Preadipocytes_1 |
| Cbfa2t3      | 1.26E-144 | -0.748 | 0.022 | 0.402 | 2.52E-141 | Preadipocytes_1 |
| Nap1l1.1     | 2.20E-143 | -0.608 | 0.162 | 0.436 | 4.39E-140 | Preadipocytes_1 |
| Fam13a.1     | 2.57E-143 | -1.304 | 0.223 | 0.428 | 5.14E-140 | Preadipocytes_1 |
| Tbc1d4.1     | 3.22E-143 | -0.699 | 0.625 | 0.815 | 6.43E-140 | Preadipocytes_1 |
| Ciita.1      | 5.40E-142 | -0.981 | 0.025 | 0.406 | 1.08E-138 | Preadipocytes_1 |
| Serpinf1.1   | 6.85E-142 | 0.703  | 0.546 | 0.222 | 1.37E-138 | Preadipocytes_1 |
| Ralgapa2.1   | 5.39E-137 | -1.091 | 0.444 | 0.679 | 1.08E-133 | Preadipocytes_1 |
| Npas3        | 8.05E-136 | 0.679  | 0.373 | 0.103 | 1.61E-132 | Preadipocytes_1 |
| Slc1a3.1     | 2.03E-133 | -1.130 | 0.086 | 0.33  | 4.07E-130 | Preadipocytes_1 |
| Tmem120b.1   | 4.41E-132 | -0.674 | 0.075 | 0.354 | 8.82E-129 | Preadipocytes_1 |
| Arap2.1      | 2.20E-131 | -0.720 | 0.001 | 0.35  | 4.40E-128 | Preadipocytes_1 |
| Samsn1       | 1.35E-130 | -0.677 | 0.001 | 0.339 | 2.70E-127 | Preadipocytes_1 |
| Lat2         | 4.36E-128 | -0.512 | 0.000 | 0.346 | 8.71E-125 | Preadipocytes_1 |
| Trhde.1      | 9.41E-127 | -0.946 | 0.019 | 0.284 | 1.88E-123 | Preadipocytes_1 |
| Ucp2         | 2.68E-126 | -0.575 | 0.000 | 0.34  | 5.36E-123 | Preadipocytes_1 |
| Gpnm1b.1     | 4.08E-125 | -1.605 | 0.256 | 0.451 | 8.16E-122 | Preadipocytes_1 |
| Gusb         | 1.38E-124 | -0.638 | 0.038 | 0.347 | 2.75E-121 | Preadipocytes_1 |
| Pcdh11x      | 3.38E-124 | 0.757  | 0.393 | 0.122 | 6.75E-121 | Preadipocytes_1 |
| Plac8.1      | 7.34E-123 | 0.709  | 0.481 | 0.302 | 1.47E-119 | Preadipocytes_1 |
| Hmgcs1.1     | 2.99E-120 | -0.649 | 0.060 | 0.268 | 5.99E-117 | Preadipocytes_1 |
| Ctsa         | 7.66E-118 | -0.603 | 0.035 | 0.344 | 1.53E-114 | Preadipocytes_1 |
| Ywhab.1      | 1.33E-117 | -0.741 | 0.188 | 0.423 | 2.67E-114 | Preadipocytes_1 |
| Emb.1        | 1.94E-117 | -0.780 | 0.318 | 0.477 | 3.88E-114 | Preadipocytes_1 |
| Me1.1        | 1.20E-116 | -0.832 | 0.211 | 0.263 | 2.40E-113 | Preadipocytes_1 |
| Runx2        | 2.53E-115 | -0.666 | 0.489 | 0.623 | 5.06E-112 | Preadipocytes_1 |
| Lmna         | 2.87E-114 | -0.596 | 0.166 | 0.405 | 5.75E-111 | Preadipocytes_1 |
| Itgb2.1      | 9.16E-114 | -0.670 | 0.000 | 0.343 | 1.83E-110 | Preadipocytes_1 |
| Kcnq5.1      | 1.93E-113 | 1.053  | 0.555 | 0.452 | 3.85E-110 | Preadipocytes_1 |
| Fgr          | 8.44E-110 | -0.618 | 0.001 | 0.319 | 1.69E-106 | Preadipocytes_1 |
| Mpeg1.1      | 1.54E-109 | -0.622 | 0.000 | 0.315 | 3.07E-106 | Preadipocytes_1 |
| Chst11       | 2.09E-109 | -0.744 | 0.449 | 0.603 | 4.19E-106 | Preadipocytes_1 |
| Rap1gap2     | 1.65E-108 | -0.948 | 0.019 | 0.43  | 3.31E-105 | Preadipocytes_1 |
| Acox1.1      | 2.20E-108 | -1.104 | 0.198 | 0.447 | 4.41E-105 | Preadipocytes_1 |
| Cd226.1      | 5.33E-107 | -1.179 | 0.003 | 0.346 | 1.07E-103 | Preadipocytes_1 |
| Optn.1       | 9.82E-104 | -0.558 | 0.167 | 0.32  | 1.96E-100 | Preadipocytes_1 |
| Plcx3.1      | 3.85E-103 | 0.695  | 0.507 | 0.311 | 7.70E-100 | Preadipocytes_1 |
| Sntb1.1      | 4.10E-103 | -1.869 | 0.003 | 0.305 | 8.20E-100 | Preadipocytes_1 |
| Ctnna3.1     | 6.21E-102 | -0.758 | 0.160 | 0.295 | 1.24E-98  | Preadipocytes_1 |
| Vim          | 6.76E-100 | -0.595 | 0.269 | 0.47  | 1.35E-96  | Preadipocytes_1 |
| H2-DMb1      | 6.72E-98  | -0.504 | 0.000 | 0.317 | 1.34E-94  | Preadipocytes_1 |
| Epha3.1      | 9.46E-97  | 0.581  | 0.561 | 0.381 | 1.89E-93  | Preadipocytes_1 |
| Fam129b      | 1.28E-95  | -0.841 | 0.245 | 0.447 | 2.56E-92  | Preadipocytes_1 |
| Sertad2      | 3.21E-94  | -0.564 | 0.422 | 0.564 | 6.42E-91  | Preadipocytes_1 |
| Il33         | 2.65E-93  | 0.685  | 0.411 | 0.17  | 5.30E-90  | Preadipocytes_1 |
| Ppfia2       | 3.75E-93  | 0.771  | 0.422 | 0.185 | 7.50E-90  | Preadipocytes_1 |
| Clybl.1      | 3.07E-92  | -0.539 | 0.499 | 0.667 | 6.14E-89  | Preadipocytes_1 |
| Ghr.1        | 5.46E-92  | -2.124 | 0.877 | 0.565 | 1.09E-88  | Preadipocytes_1 |
| Batf3        | 1.31E-91  | -0.565 | 0.001 | 0.328 | 2.61E-88  | Preadipocytes_1 |
| Cd83         | 2.03E-88  | -0.526 | 0.003 | 0.338 | 4.05E-85  | Preadipocytes_1 |
| Fcrls        | 7.40E-88  | -0.601 | 0.000 | 0.314 | 1.48E-84  | Preadipocytes_1 |
| Chpt1.1      | 9.97E-88  | -1.493 | 0.120 | 0.276 | 1.99E-84  | Preadipocytes_1 |
| Btg1.1       | 1.08E-87  | -0.564 | 0.031 | 0.36  | 2.17E-84  | Preadipocytes_1 |
| Tes.1        | 2.75E-87  | -0.651 | 0.096 | 0.399 | 5.49E-84  | Preadipocytes_1 |
| Cadps2       | 1.61E-86  | 0.724  | 0.475 | 0.286 | 3.22E-83  | Preadipocytes_1 |
| Mgl2.1       | 2.79E-84  | -0.834 | 0.004 | 0.322 | 5.58E-81  | Preadipocytes_1 |
| Tmtc2.1      | 2.11E-83  | 0.887  | 0.637 | 0.542 | 4.22E-80  | Preadipocytes_1 |

|           |          |        |       |       |          |                 |
|-----------|----------|--------|-------|-------|----------|-----------------|
| Cat.1     | 3.20E-83 | -0.889 | 0.086 | 0.335 | 6.40E-80 | Preadipocytes_1 |
| Cacna1e.1 | 1.87E-82 | -0.772 | 0.043 | 0.253 | 3.73E-79 | Preadipocytes_1 |
| Hacd2.1   | 4.45E-79 | -1.697 | 0.134 | 0.349 | 8.91E-76 | Preadipocytes_1 |
| C1qc      | 1.34E-77 | -0.905 | 0.001 | 0.337 | 2.69E-74 | Preadipocytes_1 |
| Dkk2.1    | 3.60E-74 | 0.551  | 0.469 | 0.319 | 7.21E-71 | Preadipocytes_1 |
| Lpgat1.1  | 5.14E-74 | -1.974 | 0.216 | 0.395 | 1.03E-70 | Preadipocytes_1 |
| Ddx60.1   | 1.67E-72 | -0.609 | 0.563 | 0.696 | 3.34E-69 | Preadipocytes_1 |
| Basp1.1   | 4.65E-70 | 0.724  | 0.553 | 0.465 | 9.31E-67 | Preadipocytes_1 |
| Fabp4.1   | 8.07E-68 | -2.128 | 0.395 | 0.503 | 1.61E-64 | Preadipocytes_1 |
| F3        | 1.46E-67 | -0.768 | 0.167 | 0.262 | 2.91E-64 | Preadipocytes_1 |
| Col4a2.1  | 6.45E-66 | -1.105 | 0.391 | 0.489 | 1.29E-62 | Preadipocytes_1 |
| Wnt5b     | 7.42E-65 | 0.961  | 0.408 | 0.194 | 1.48E-61 | Preadipocytes_1 |
| Vcl.1     | 2.31E-63 | -0.679 | 0.467 | 0.612 | 4.61E-60 | Preadipocytes_1 |
| Il1rl1    | 1.02E-61 | -0.584 | 0.015 | 0.336 | 2.05E-58 | Preadipocytes_1 |
| Elf2.1    | 2.39E-61 | -0.670 | 0.490 | 0.612 | 4.79E-58 | Preadipocytes_1 |
| Apod.1    | 3.30E-61 | 0.511  | 0.439 | 0.205 | 6.59E-58 | Preadipocytes_1 |
| Mme.1     | 2.86E-60 | -0.678 | 0.364 | 0.381 | 5.73E-57 | Preadipocytes_1 |
| Kcnt2.1   | 4.93E-56 | 0.540  | 0.612 | 0.589 | 9.86E-53 | Preadipocytes_1 |
| Fam126b.1 | 1.32E-52 | -1.125 | 0.202 | 0.395 | 2.64E-49 | Preadipocytes_1 |
| Pdpr      | 7.01E-52 | 0.709  | 0.437 | 0.265 | 1.40E-48 | Preadipocytes_1 |
| Me3       | 6.23E-48 | 0.649  | 0.392 | 0.19  | 1.25E-44 | Preadipocytes_1 |
| Ltc4s     | 1.77E-47 | -0.509 | 0.037 | 0.346 | 3.54E-44 | Preadipocytes_1 |
| Crispld1  | 1.81E-46 | 0.762  | 0.371 | 0.133 | 3.62E-43 | Preadipocytes_1 |
| Sema3a    | 5.60E-44 | 0.509  | 0.461 | 0.32  | 1.12E-40 | Preadipocytes_1 |
| Cass4     | 3.94E-43 | -0.518 | 0.001 | 0.322 | 7.88E-40 | Preadipocytes_1 |
| Chn2.1    | 2.83E-42 | -0.840 | 0.483 | 0.559 | 5.65E-39 | Preadipocytes_1 |
| Adcy5.1   | 2.95E-42 | -0.554 | 0.269 | 0.248 | 5.89E-39 | Preadipocytes_1 |
| Dram1.1   | 6.46E-42 | -0.786 | 0.164 | 0.288 | 1.29E-38 | Preadipocytes_1 |
| Ccser1    | 1.66E-40 | 0.795  | 0.542 | 0.491 | 3.31E-37 | Preadipocytes_1 |
| Ryr2.1    | 2.12E-40 | -1.017 | 0.001 | 0.264 | 4.25E-37 | Preadipocytes_1 |
| Plbd1     | 5.53E-40 | -0.516 | 0.000 | 0.31  | 1.11E-36 | Preadipocytes_1 |
| Adam12.1  | 2.90E-39 | -1.873 | 0.525 | 0.531 | 5.79E-36 | Preadipocytes_1 |
| Myo1d.1   | 2.92E-39 | -0.617 | 0.314 | 0.423 | 5.84E-36 | Preadipocytes_1 |
| Ighm.1    | 3.23E-38 | -0.649 | 0.000 | 0.323 | 6.45E-35 | Preadipocytes_1 |
| Fam241a.1 | 8.56E-38 | -0.567 | 0.001 | 0.351 | 1.71E-34 | Preadipocytes_1 |
| Abcd2.1   | 1.18E-37 | -0.545 | 0.425 | 0.542 | 2.35E-34 | Preadipocytes_1 |
| Dnm3      | 1.95E-36 | 0.555  | 0.632 | 0.636 | 3.89E-33 | Preadipocytes_1 |
| Rgs7.1    | 4.93E-36 | -0.639 | 0.487 | 0.328 | 9.86E-33 | Preadipocytes_1 |
| Prkar2b.1 | 1.10E-35 | -2.601 | 0.007 | 0.383 | 2.19E-32 | Preadipocytes_1 |
| Gpr1      | 2.86E-35 | 0.971  | 0.362 | 0.097 | 5.73E-32 | Preadipocytes_1 |
| Edn1      | 2.20E-33 | 0.893  | 0.389 | 0.206 | 4.41E-30 | Preadipocytes_1 |
| Mpp7.1    | 7.90E-33 | -1.608 | 0.207 | 0.34  | 1.58E-29 | Preadipocytes_1 |
| Slc1a5.1  | 1.45E-32 | -0.741 | 0.598 | 0.444 | 2.91E-29 | Preadipocytes_1 |
| Gria4.1   | 1.64E-32 | -0.584 | 0.451 | 0.353 | 3.28E-29 | Preadipocytes_1 |
| Npas2     | 2.33E-32 | 0.563  | 0.433 | 0.333 | 4.66E-29 | Preadipocytes_1 |
| Trabd2b.1 | 5.63E-30 | -0.939 | 0.336 | 0.356 | 1.13E-26 | Preadipocytes_1 |
| Inpp4b    | 8.13E-30 | -0.779 | 0.444 | 0.533 | 1.63E-26 | Preadipocytes_1 |
| Fmr1.1    | 1.66E-28 | -0.882 | 0.246 | 0.399 | 3.32E-25 | Preadipocytes_1 |
| Ccbe1.1   | 3.45E-28 | -0.789 | 0.435 | 0.279 | 6.90E-25 | Preadipocytes_1 |
| Tox.1     | 1.26E-27 | -0.555 | 0.312 | 0.336 | 2.52E-24 | Preadipocytes_1 |
| Ndnf      | 5.84E-27 | -0.505 | 0.001 | 0.276 | 1.17E-23 | Preadipocytes_1 |
| Slc24a3.1 | 8.16E-26 | -1.158 | 0.555 | 0.609 | 1.63E-22 | Preadipocytes_1 |
| Sgcd.1    | 4.83E-23 | -1.056 | 0.741 | 0.559 | 9.66E-20 | Preadipocytes_1 |
| Skint3    | 4.71E-22 | -0.546 | 0.000 | 0.258 | 9.43E-19 | Preadipocytes_1 |
| Ccn2      | 2.18E-20 | 0.586  | 0.354 | 0.125 | 4.35E-17 | Preadipocytes_1 |
| Akr1c18   | 5.96E-20 | 0.518  | 0.270 | 0.089 | 1.19E-16 | Preadipocytes_1 |
| Nrip1.1   | 6.00E-20 | -0.519 | 0.821 | 0.659 | 1.20E-16 | Preadipocytes_1 |
| Prkd1.1   | 1.53E-19 | -0.848 | 0.710 | 0.532 | 3.05E-16 | Preadipocytes_1 |
| Cd200     | 2.04E-19 | 0.513  | 0.294 | 0.312 | 4.08E-16 | Preadipocytes_1 |
| Cobl      | 5.72E-17 | 0.554  | 0.347 | 0.144 | 1.14E-13 | Preadipocytes_1 |
| Ldb2.1    | 9.23E-17 | -0.546 | 0.524 | 0.448 | 1.85E-13 | Preadipocytes_1 |
| Cytip     | 1.72E-16 | -0.642 | 0.001 | 0.265 | 3.43E-13 | Preadipocytes_1 |

|              |           |        |       |       |             |                 |
|--------------|-----------|--------|-------|-------|-------------|-----------------|
| Lsmp         | 2.50E-13  | -0.570 | 0.309 | 0.284 | 5.01E-10    | Preadipocytes_1 |
| Serpine2     | 2.96E-12  | 0.519  | 0.361 | 0.179 | 5.91E-09    | Preadipocytes_1 |
| Tmeff1.1     | 1.18E-11  | 0.542  | 0.353 | 0.194 | 2.36E-08    | Preadipocytes_1 |
| Kcnc2.1      | 4.71E-11  | -0.667 | 0.392 | 0.264 | 9.42E-08    | Preadipocytes_1 |
| Rgs20        | 3.98E-10  | 0.522  | 0.314 | 0.323 | 7.96E-07    | Preadipocytes_1 |
| Has2         | 3.64E-09  | 0.713  | 0.339 | 0.156 | 7.29E-06    | Preadipocytes_1 |
| Fmo2.1       | 4.29E-08  | -1.079 | 0.343 | 0.293 | 8.57E-05    | Preadipocytes_1 |
| Lipe.1       | 4.07E-06  | -1.192 | 0.001 | 0.277 | 0.008131997 | Preadipocytes_1 |
| Sgip1.1      | 0.0001046 | -0.881 | 0.469 | 0.501 | 0.20916604  | Preadipocytes_1 |
| Tln2.1       | 0.0001981 | -0.542 | 0.530 | 0.436 | 0.396254521 | Preadipocytes_1 |
| Bckdhhb.1    | 0.0003779 | -0.849 | 0.579 | 0.528 | 0.755817721 | Preadipocytes_1 |
| Mmd.1        | 0.0010236 | -1.784 | 0.001 | 0.285 | 1           | Preadipocytes_1 |
| Pde11a.1     | 0.0085761 | -1.060 | 0.472 | 0.396 | 1           | Preadipocytes_1 |
| Gsn.1        | 0         | 3.009  | 0.970 | 0.65  | 0           | Preadipocytes_2 |
| Fmo2.2       | 0         | 2.728  | 0.665 | 0.236 | 0           | Preadipocytes_2 |
| Pde11a.2     | 0         | 2.618  | 0.693 | 0.363 | 0           | Preadipocytes_2 |
| Itgbl1.1     | 0         | 2.566  | 0.930 | 0.603 | 0           | Preadipocytes_2 |
| Col3a1.2     | 0         | 2.490  | 0.991 | 0.686 | 0           | Preadipocytes_2 |
| Col1a1.1     | 0         | 2.489  | 0.870 | 0.425 | 0           | Preadipocytes_2 |
| Hmcn2.1      | 0         | 2.454  | 0.692 | 0.352 | 0           | Preadipocytes_2 |
| Ldb2.2       | 0         | 2.353  | 0.819 | 0.4   | 0           | Preadipocytes_2 |
| Bmper        | 0         | 2.349  | 0.869 | 0.547 | 0           | Preadipocytes_2 |
| Adamts12.1   | 0         | 2.303  | 0.964 | 0.69  | 0           | Preadipocytes_2 |
| Sgip1.2      | 0         | 2.293  | 0.738 | 0.444 | 0           | Preadipocytes_2 |
| Col1a2.2     | 0         | 2.277  | 0.968 | 0.562 | 0           | Preadipocytes_2 |
| Meox2.1      | 0         | 2.256  | 0.706 | 0.389 | 0           | Preadipocytes_2 |
| Bgn.1        | 0         | 2.208  | 0.786 | 0.121 | 0           | Preadipocytes_2 |
| Ccbe1.2      | 0         | 2.205  | 0.661 | 0.255 | 0           | Preadipocytes_2 |
| Igfbp7.1     | 0         | 2.153  | 0.825 | 0.279 | 0           | Preadipocytes_2 |
| Col6a3       | 0         | 2.095  | 0.890 | 0.469 | 0           | Preadipocytes_2 |
| Gria3.1      | 0         | 2.075  | 0.835 | 0.506 | 0           | Preadipocytes_2 |
| Col4a1.2     | 0         | 2.061  | 0.907 | 0.448 | 0           | Preadipocytes_2 |
| Prickle1     | 0         | 2.019  | 0.783 | 0.503 | 0           | Preadipocytes_2 |
| Ror1.1       | 0         | 2.010  | 0.877 | 0.557 | 0           | Preadipocytes_2 |
| B3galt1      | 0         | 2.008  | 0.888 | 0.533 | 0           | Preadipocytes_2 |
| Smoc2.1      | 0         | 1.975  | 0.763 | 0.356 | 0           | Preadipocytes_2 |
| Mmp3.1       | 0         | 1.919  | 0.687 | 0.216 | 0           | Preadipocytes_2 |
| Sparc.1      | 0         | 1.854  | 0.867 | 0.507 | 0           | Preadipocytes_2 |
| Col4a2.2     | 0         | 1.788  | 0.846 | 0.386 | 0           | Preadipocytes_2 |
| Col6a2       | 0         | 1.731  | 0.819 | 0.324 | 0           | Preadipocytes_2 |
| Dcn.2        | 0         | 1.730  | 0.961 | 0.552 | 0           | Preadipocytes_2 |
| Abca8a.2     | 0         | 1.716  | 0.855 | 0.537 | 0           | Preadipocytes_2 |
| Svep1.1      | 0         | 1.705  | 0.928 | 0.569 | 0           | Preadipocytes_2 |
| Epha3.2      | 0         | 1.669  | 0.683 | 0.381 | 0           | Preadipocytes_2 |
| Auts2.1      | 0         | 1.646  | 0.910 | 0.614 | 0           | Preadipocytes_2 |
| Csgalnact1.1 | 0         | 1.611  | 0.766 | 0.517 | 0           | Preadipocytes_2 |
| Lum          | 0         | 1.598  | 0.674 | 0.084 | 0           | Preadipocytes_2 |
| Galnt17.2    | 0         | 1.576  | 0.805 | 0.52  | 0           | Preadipocytes_2 |
| Adam23       | 0         | 1.562  | 0.749 | 0.459 | 0           | Preadipocytes_2 |
| Boc          | 0         | 1.550  | 0.726 | 0.427 | 0           | Preadipocytes_2 |
| Plpp1        | 0         | 1.549  | 0.746 | 0.45  | 0           | Preadipocytes_2 |
| Gpm6b.1      | 0         | 1.543  | 0.674 | 0.292 | 0           | Preadipocytes_2 |
| Gucy1a2.1    | 0         | 1.524  | 0.659 | 0.344 | 0           | Preadipocytes_2 |
| Col6a1.1     | 0         | 1.486  | 0.746 | 0.207 | 0           | Preadipocytes_2 |
| Cacna1c      | 0         | 1.429  | 0.671 | 0.422 | 0           | Preadipocytes_2 |
| Gpr39        | 0         | 1.405  | 0.561 | 0.25  | 0           | Preadipocytes_2 |
| Serpinf1.2   | 0         | 1.395  | 0.679 | 0.239 | 0           | Preadipocytes_2 |
| Mgp          | 0         | 1.393  | 0.498 | 0.068 | 0           | Preadipocytes_2 |
| Thsd7a.2     | 0         | 1.389  | 0.894 | 0.653 | 0           | Preadipocytes_2 |
| Aldh1a1.2    | 0         | 1.380  | 0.924 | 0.692 | 0           | Preadipocytes_2 |
| Col5a3.1     | 0         | 1.343  | 0.807 | 0.513 | 0           | Preadipocytes_2 |
| Gdf10        | 0         | 1.336  | 0.503 | 0.052 | 0           | Preadipocytes_2 |

|           |           |        |       |       |           |                 |
|-----------|-----------|--------|-------|-------|-----------|-----------------|
| Dcl1.2    | 0         | 1.333  | 0.832 | 0.558 | 0         | Preadipocytes_2 |
| Fbln2.2   | 0         | 1.331  | 0.804 | 0.385 | 0         | Preadipocytes_2 |
| Prickle2  | 0         | 1.307  | 0.724 | 0.41  | 0         | Preadipocytes_2 |
| Sparcl1   | 0         | 1.229  | 0.511 | 0.058 | 0         | Preadipocytes_2 |
| Gas1      | 0         | 1.217  | 0.562 | 0.127 | 0         | Preadipocytes_2 |
| Pcolce.1  | 0         | 1.215  | 0.647 | 0.238 | 0         | Preadipocytes_2 |
| Gask1b.2  | 0         | 1.197  | 0.746 | 0.461 | 0         | Preadipocytes_2 |
| Kalrn     | 0         | 1.083  | 0.520 | 0.112 | 0         | Preadipocytes_2 |
| Col15a1.2 | 0         | 1.068  | 0.690 | 0.336 | 0         | Preadipocytes_2 |
| Prdm6     | 0         | 1.021  | 0.498 | 0.144 | 0         | Preadipocytes_2 |
| Mdga2     | 0         | 1.017  | 0.455 | 0.144 | 0         | Preadipocytes_2 |
| Fhl2      | 0         | 0.973  | 0.556 | 0.224 | 0         | Preadipocytes_2 |
| Steap4    | 0         | 0.960  | 0.553 | 0.112 | 0         | Preadipocytes_2 |
| Mid1.2    | 0         | 0.957  | 0.959 | 0.649 | 0         | Preadipocytes_2 |
| Nox4.2    | 0         | 0.922  | 0.908 | 0.657 | 0         | Preadipocytes_2 |
| Ntf3      | 0         | 0.843  | 0.506 | 0.132 | 0         | Preadipocytes_2 |
| Cdh11     | 0         | 0.796  | 0.501 | 0.124 | 0         | Preadipocytes_2 |
| Lox       | 0         | 0.787  | 0.558 | 0.183 | 0         | Preadipocytes_2 |
| Abcc9     | 0         | 0.732  | 0.477 | 0.143 | 0         | Preadipocytes_2 |
| Egflam    | 0         | 0.663  | 0.431 | 0.09  | 0         | Preadipocytes_2 |
| L3mbtl4   | 0         | 0.645  | 0.414 | 0.055 | 0         | Preadipocytes_2 |
| Hpgds.1   | 0         | -0.851 | 0.123 | 0.507 | 0         | Preadipocytes_2 |
| Pde7a.1   | 0         | -1.247 | 0.325 | 0.781 | 0         | Preadipocytes_2 |
| Slc27a1.2 | 0         | -1.270 | 0.072 | 0.51  | 0         | Preadipocytes_2 |
| Pfkfb3.2  | 0         | -1.289 | 0.068 | 0.5   | 0         | Preadipocytes_2 |
| St8sia4.2 | 0         | -1.344 | 0.054 | 0.478 | 0         | Preadipocytes_2 |
| Slc6a6.1  | 0         | -1.448 | 0.177 | 0.63  | 0         | Preadipocytes_2 |
| Adgre1.2  | 0         | -1.836 | 0.215 | 0.555 | 0         | Preadipocytes_2 |
| Apobec1.1 | 0         | -1.891 | 0.227 | 0.601 | 0         | Preadipocytes_2 |
| Rbm47.2   | 0         | -1.979 | 0.310 | 0.644 | 0         | Preadipocytes_2 |
| Hdac9.1   | 0         | -2.248 | 0.225 | 0.607 | 0         | Preadipocytes_2 |
| Fbln1     | 3.16E-306 | 1.115  | 0.527 | 0.12  | 6.32E-303 | Preadipocytes_2 |
| Bcar3.2   | 6.90E-306 | -1.940 | 0.100 | 0.487 | 1.38E-302 | Preadipocytes_2 |
| Eda.1     | 1.08E-305 | 1.507  | 0.845 | 0.669 | 2.15E-302 | Preadipocytes_2 |
| Csf2ra.2  | 4.34E-305 | -1.383 | 0.043 | 0.483 | 8.67E-302 | Preadipocytes_2 |
| Adam12.2  | 2.18E-300 | 1.191  | 0.773 | 0.481 | 4.37E-297 | Preadipocytes_2 |
| Nrp2.2    | 7.49E-300 | -0.898 | 0.155 | 0.491 | 1.50E-296 | Preadipocytes_2 |
| Cd84.2    | 1.92E-296 | -1.791 | 0.186 | 0.525 | 3.84E-293 | Preadipocytes_2 |
| Pltp.1    | 1.39E-295 | -1.651 | 0.115 | 0.507 | 2.79E-292 | Preadipocytes_2 |
| Fmo1      | 1.29E-293 | 1.354  | 0.649 | 0.323 | 2.57E-290 | Preadipocytes_2 |
| Clec3b.2  | 4.27E-291 | 1.213  | 0.797 | 0.444 | 8.55E-288 | Preadipocytes_2 |
| Plin2.1   | 7.71E-290 | -1.438 | 0.181 | 0.552 | 1.54E-286 | Preadipocytes_2 |
| Alcam.1   | 1.54E-289 | -3.020 | 0.265 | 0.579 | 3.08E-286 | Preadipocytes_2 |
| Ccn5      | 3.44E-289 | 0.975  | 0.513 | 0.164 | 6.87E-286 | Preadipocytes_2 |
| Ism1      | 1.57E-287 | 1.366  | 0.566 | 0.257 | 3.15E-284 | Preadipocytes_2 |
| Angpt1.1  | 1.38E-286 | 1.428  | 0.752 | 0.479 | 2.76E-283 | Preadipocytes_2 |
| Cd200r1.2 | 1.77E-283 | -1.382 | 0.154 | 0.492 | 3.55E-280 | Preadipocytes_2 |
| Shtn1.2   | 2.25E-283 | -1.518 | 0.181 | 0.531 | 4.50E-280 | Preadipocytes_2 |
| Wdfy4.2   | 2.26E-280 | -1.185 | 0.077 | 0.483 | 4.53E-277 | Preadipocytes_2 |
| Mtss1.1   | 4.45E-279 | -1.897 | 0.410 | 0.651 | 8.90E-276 | Preadipocytes_2 |
| Fgf7.1    | 2.23E-278 | 1.153  | 0.645 | 0.32  | 4.45E-275 | Preadipocytes_2 |
| Sgcd.2    | 6.46E-276 | 0.563  | 0.883 | 0.555 | 1.29E-272 | Preadipocytes_2 |
| Blnk.2    | 1.00E-273 | -1.507 | 0.220 | 0.531 | 2.01E-270 | Preadipocytes_2 |
| Ctsb.2    | 5.33E-271 | -1.847 | 0.080 | 0.534 | 1.07E-267 | Preadipocytes_2 |
| C7.1      | 8.17E-271 | 2.827  | 0.671 | 0.373 | 1.63E-267 | Preadipocytes_2 |
| Timp3.2   | 1.47E-269 | 1.154  | 0.728 | 0.389 | 2.94E-266 | Preadipocytes_2 |
| Abhd12.2  | 1.49E-264 | -1.561 | 0.250 | 0.626 | 2.98E-261 | Preadipocytes_2 |
| Ptpre.1   | 6.18E-262 | -0.834 | 0.099 | 0.426 | 1.24E-258 | Preadipocytes_2 |
| Eln.2     | 5.50E-261 | 1.967  | 0.745 | 0.458 | 1.10E-257 | Preadipocytes_2 |
| Gas2l3.2  | 2.57E-259 | -0.796 | 0.107 | 0.459 | 5.15E-256 | Preadipocytes_2 |
| Psap.2    | 1.05E-258 | -2.326 | 0.230 | 0.582 | 2.10E-255 | Preadipocytes_2 |
| Postn.2   | 2.95E-255 | 1.053  | 0.702 | 0.368 | 5.90E-252 | Preadipocytes_2 |

|            |           |        |       |       |           |                 |
|------------|-----------|--------|-------|-------|-----------|-----------------|
| Apoe.2     | 5.06E-251 | -2.359 | 0.260 | 0.557 | 1.01E-247 | Preadipocytes_2 |
| Noct.2     | 6.70E-248 | -0.812 | 0.174 | 0.497 | 1.34E-244 | Preadipocytes_2 |
| Prex2      | 5.65E-247 | 1.327  | 0.706 | 0.456 | 1.13E-243 | Preadipocytes_2 |
| Prkd1.2    | 2.70E-246 | 0.508  | 0.855 | 0.527 | 5.40E-243 | Preadipocytes_2 |
| Cacna1d.2  | 1.04E-245 | -1.174 | 0.269 | 0.518 | 2.08E-242 | Preadipocytes_2 |
| Cd36.2     | 3.38E-245 | -2.480 | 0.357 | 0.63  | 6.76E-242 | Preadipocytes_2 |
| Pik3cb.2   | 1.11E-244 | -0.771 | 0.031 | 0.42  | 2.22E-241 | Preadipocytes_2 |
| Ltbp4      | 1.10E-242 | 1.337  | 0.504 | 0.108 | 2.20E-239 | Preadipocytes_2 |
| Pde3b.2    | 1.10E-242 | -2.062 | 0.327 | 0.625 | 2.21E-239 | Preadipocytes_2 |
| Ctsc.1     | 1.73E-242 | -1.569 | 0.282 | 0.528 | 3.47E-239 | Preadipocytes_2 |
| Prkg1.2    | 2.26E-241 | 1.192  | 0.838 | 0.697 | 4.52E-238 | Preadipocytes_2 |
| Cybb.2     | 5.48E-241 | -1.093 | 0.010 | 0.419 | 1.10E-237 | Preadipocytes_2 |
| Fry.2      | 5.22E-239 | -2.145 | 0.229 | 0.554 | 1.04E-235 | Preadipocytes_2 |
| Fyb.2      | 1.02E-237 | -1.978 | 0.334 | 0.566 | 2.03E-234 | Preadipocytes_2 |
| Slc16a10.2 | 1.25E-237 | -1.474 | 0.294 | 0.65  | 2.50E-234 | Preadipocytes_2 |
| Ehd4.2     | 1.75E-233 | -1.166 | 0.196 | 0.5   | 3.50E-230 | Preadipocytes_2 |
| C5ar1.2    | 2.65E-233 | -0.646 | 0.023 | 0.396 | 5.29E-230 | Preadipocytes_2 |
| Pdzrn3.2   | 3.50E-232 | 0.584  | 0.725 | 0.389 | 7.00E-229 | Preadipocytes_2 |
| Tenm4.2    | 2.87E-231 | -3.200 | 0.083 | 0.48  | 5.74E-228 | Preadipocytes_2 |
| Nrip1.2    | 5.55E-231 | 0.619  | 0.919 | 0.662 | 1.11E-227 | Preadipocytes_2 |
| Aebp1.2    | 9.43E-231 | 0.836  | 0.637 | 0.24  | 1.89E-227 | Preadipocytes_2 |
| F3.1       | 4.59E-230 | 1.612  | 0.523 | 0.179 | 9.17E-227 | Preadipocytes_2 |
| Sirpa.2    | 1.02E-229 | -1.152 | 0.184 | 0.554 | 2.04E-226 | Preadipocytes_2 |
| Ghr.2      | 3.39E-228 | -1.037 | 0.931 | 0.596 | 6.78E-225 | Preadipocytes_2 |
| Pcdh19.2   | 4.09E-227 | 0.915  | 0.754 | 0.496 | 8.17E-224 | Preadipocytes_2 |
| Evl.2      | 1.28E-225 | -1.126 | 0.134 | 0.432 | 2.55E-222 | Preadipocytes_2 |
| Nrep       | 1.02E-223 | 1.500  | 0.595 | 0.301 | 2.03E-220 | Preadipocytes_2 |
| Prkch.1    | 2.41E-223 | -1.027 | 0.228 | 0.49  | 4.82E-220 | Preadipocytes_2 |
| Nckap1l.2  | 3.90E-223 | -1.165 | 0.172 | 0.482 | 7.79E-220 | Preadipocytes_2 |
| Pik3ap1.1  | 2.45E-220 | -1.226 | 0.283 | 0.527 | 4.89E-217 | Preadipocytes_2 |
| Sned1      | 1.11E-219 | 1.399  | 0.628 | 0.394 | 2.23E-216 | Preadipocytes_2 |
| Pik3r5.2   | 3.69E-219 | -1.001 | 0.152 | 0.45  | 7.38E-216 | Preadipocytes_2 |
| Cd300a.2   | 2.36E-217 | -0.988 | 0.032 | 0.431 | 4.73E-214 | Preadipocytes_2 |
| Cdh13.1    | 1.76E-216 | 1.783  | 0.670 | 0.461 | 3.51E-213 | Preadipocytes_2 |
| Aplp2.2    | 3.66E-214 | -1.146 | 0.187 | 0.574 | 7.33E-211 | Preadipocytes_2 |
| Chd7.2     | 4.64E-214 | -0.734 | 0.088 | 0.452 | 9.28E-211 | Preadipocytes_2 |
| Rnf149.1   | 8.56E-214 | -0.845 | 0.131 | 0.48  | 1.71E-210 | Preadipocytes_2 |
| Lcp1.2     | 9.31E-214 | -1.725 | 0.222 | 0.513 | 1.86E-210 | Preadipocytes_2 |
| Cygb       | 3.07E-213 | 1.046  | 0.472 | 0.092 | 6.15E-210 | Preadipocytes_2 |
| Clec10a.2  | 7.40E-213 | -1.431 | 0.217 | 0.493 | 1.48E-209 | Preadipocytes_2 |
| Gabra3.2   | 8.17E-212 | 1.272  | 0.726 | 0.501 | 1.63E-208 | Preadipocytes_2 |
| Pcsk5.1    | 1.59E-211 | 1.257  | 0.778 | 0.596 | 3.18E-208 | Preadipocytes_2 |
| Mme.2      | 3.53E-210 | 0.826  | 0.618 | 0.328 | 7.06E-207 | Preadipocytes_2 |
| Myo1f.2    | 6.24E-210 | -2.000 | 0.348 | 0.549 | 1.25E-206 | Preadipocytes_2 |
| Mpp1.1     | 1.12E-208 | -0.721 | 0.120 | 0.493 | 2.25E-205 | Preadipocytes_2 |
| Insyn2b.2  | 5.61E-208 | -0.928 | 0.196 | 0.471 | 1.12E-204 | Preadipocytes_2 |
| Atp8b4.2   | 2.04E-206 | -1.320 | 0.131 | 0.435 | 4.09E-203 | Preadipocytes_2 |
| Shisa6     | 8.67E-206 | 0.555  | 0.449 | 0.173 | 1.73E-202 | Preadipocytes_2 |
| Ctss.2     | 7.82E-205 | -1.272 | 0.016 | 0.416 | 1.56E-201 | Preadipocytes_2 |
| Eya2       | 2.23E-203 | 1.470  | 0.617 | 0.388 | 4.46E-200 | Preadipocytes_2 |
| Spi1.2     | 8.65E-203 | -0.960 | 0.093 | 0.448 | 1.73E-199 | Preadipocytes_2 |
| Vegfc      | 3.82E-202 | 1.335  | 0.574 | 0.323 | 7.64E-199 | Preadipocytes_2 |
| Ccl6.2     | 3.89E-201 | -1.195 | 0.019 | 0.398 | 7.79E-198 | Preadipocytes_2 |
| Hipk2.2    | 1.23E-200 | -1.316 | 0.357 | 0.672 | 2.46E-197 | Preadipocytes_2 |
| Lgmn.2     | 1.69E-197 | -1.434 | 0.185 | 0.494 | 3.38E-194 | Preadipocytes_2 |
| Colec12.1  | 3.03E-196 | 1.013  | 0.760 | 0.631 | 6.07E-193 | Preadipocytes_2 |
| Abcd2.2    | 3.81E-196 | -0.869 | 0.204 | 0.57  | 7.62E-193 | Preadipocytes_2 |
| Cnnm2.2    | 8.85E-196 | -0.746 | 0.338 | 0.652 | 1.77E-192 | Preadipocytes_2 |
| Ccr5.2     | 6.85E-195 | -0.849 | 0.050 | 0.407 | 1.37E-191 | Preadipocytes_2 |
| Il7r.2     | 1.48E-194 | -0.647 | 0.016 | 0.34  | 2.97E-191 | Preadipocytes_2 |
| Cpeb4.2    | 1.50E-191 | -1.275 | 0.310 | 0.645 | 3.00E-188 | Preadipocytes_2 |
| Ptprg.2    | 3.74E-190 | 0.691  | 0.895 | 0.64  | 7.49E-187 | Preadipocytes_2 |

|             |           |        |       |       |           |                 |
|-------------|-----------|--------|-------|-------|-----------|-----------------|
| Gramd1b.1   | 3.93E-190 | -0.703 | 0.228 | 0.487 | 7.86E-187 | Preadipocytes_2 |
| Atp6v0d2.2  | 7.95E-190 | -1.431 | 0.184 | 0.473 | 1.59E-186 | Preadipocytes_2 |
| Fgf13.2     | 5.49E-189 | -1.218 | 0.225 | 0.465 | 1.10E-185 | Preadipocytes_2 |
| Adamts1.2   | 6.83E-189 | 0.571  | 0.886 | 0.709 | 1.37E-185 | Preadipocytes_2 |
| Mgll.1      | 1.25E-188 | -1.087 | 0.243 | 0.488 | 2.50E-185 | Preadipocytes_2 |
| Ptpn22.2    | 3.50E-188 | -1.087 | 0.108 | 0.419 | 7.01E-185 | Preadipocytes_2 |
| Irak2.2     | 1.11E-187 | -0.867 | 0.169 | 0.482 | 2.22E-184 | Preadipocytes_2 |
| Lyz2.2      | 2.09E-186 | -1.445 | 0.028 | 0.394 | 4.18E-183 | Preadipocytes_2 |
| Nabp1.2     | 3.08E-186 | -0.753 | 0.069 | 0.404 | 6.16E-183 | Preadipocytes_2 |
| Adh1        | 1.62E-185 | 0.953  | 0.515 | 0.223 | 3.23E-182 | Preadipocytes_2 |
| Itga4.2     | 3.67E-183 | -1.455 | 0.191 | 0.461 | 7.34E-180 | Preadipocytes_2 |
| Slc6a7      | 4.28E-183 | 0.696  | 0.429 | 0.131 | 8.56E-180 | Preadipocytes_2 |
| Msr1.2      | 2.82E-182 | -0.729 | 0.169 | 0.439 | 5.63E-179 | Preadipocytes_2 |
| Lsmp.1      | 6.98E-182 | 1.647  | 0.497 | 0.25  | 1.40E-178 | Preadipocytes_2 |
| Pacrg.2     | 2.39E-181 | -0.828 | 0.140 | 0.486 | 4.78E-178 | Preadipocytes_2 |
| Lrp12       | 1.95E-177 | -0.552 | 0.275 | 0.575 | 3.91E-174 | Preadipocytes_2 |
| Gpc3.2      | 6.29E-175 | 1.100  | 0.617 | 0.387 | 1.26E-171 | Preadipocytes_2 |
| Lpin1.2     | 7.82E-175 | -0.772 | 0.106 | 0.44  | 1.56E-171 | Preadipocytes_2 |
| Kcnt2.2     | 8.35E-175 | 1.561  | 0.691 | 0.576 | 1.67E-171 | Preadipocytes_2 |
| St18.2      | 4.51E-174 | -1.328 | 0.243 | 0.479 | 9.02E-171 | Preadipocytes_2 |
| Ccdc80.1    | 1.45E-173 | 0.820  | 0.779 | 0.468 | 2.91E-170 | Preadipocytes_2 |
| Notch3      | 2.69E-173 | 0.707  | 0.425 | 0.139 | 5.37E-170 | Preadipocytes_2 |
| Slc5a3.2    | 1.20E-171 | -0.639 | 0.080 | 0.413 | 2.40E-168 | Preadipocytes_2 |
| Lilr4b.2    | 1.18E-169 | -0.646 | 0.049 | 0.389 | 2.36E-166 | Preadipocytes_2 |
| Ubash3b.2   | 7.62E-169 | -1.265 | 0.300 | 0.501 | 1.52E-165 | Preadipocytes_2 |
| Ahcy12.2    | 1.05E-168 | -1.525 | 0.433 | 0.671 | 2.11E-165 | Preadipocytes_2 |
| Enpp2.2     | 8.65E-168 | 0.746  | 0.591 | 0.291 | 1.73E-164 | Preadipocytes_2 |
| Grk3.1      | 2.38E-167 | -0.749 | 0.117 | 0.406 | 4.76E-164 | Preadipocytes_2 |
| Tec.2       | 2.72E-166 | -1.036 | 0.258 | 0.475 | 5.44E-163 | Preadipocytes_2 |
| Plcb1.2     | 2.18E-165 | -2.016 | 0.349 | 0.627 | 4.37E-162 | Preadipocytes_2 |
| Serpinh1    | 6.85E-163 | 1.030  | 0.532 | 0.207 | 1.37E-159 | Preadipocytes_2 |
| Foxp2.2     | 1.15E-160 | 0.898  | 0.519 | 0.244 | 2.30E-157 | Preadipocytes_2 |
| Tmem106a.2  | 1.93E-160 | -0.695 | 0.134 | 0.456 | 3.87E-157 | Preadipocytes_2 |
| Osbpl8.1    | 3.03E-159 | -1.253 | 0.599 | 0.773 | 6.07E-156 | Preadipocytes_2 |
| Atp6v1b2.1  | 1.11E-157 | -0.925 | 0.300 | 0.602 | 2.22E-154 | Preadipocytes_2 |
| Adamts3     | 1.26E-157 | 0.582  | 0.401 | 0.137 | 2.52E-154 | Preadipocytes_2 |
| Chrd1       | 2.08E-155 | 1.380  | 0.589 | 0.366 | 4.17E-152 | Preadipocytes_2 |
| Specc1.2    | 9.02E-155 | -1.115 | 0.385 | 0.548 | 1.80E-151 | Preadipocytes_2 |
| Map1b.2     | 4.07E-153 | 1.055  | 0.565 | 0.279 | 8.13E-150 | Preadipocytes_2 |
| Pla2g7.2    | 5.25E-153 | -0.820 | 0.107 | 0.397 | 1.05E-149 | Preadipocytes_2 |
| Itih5.2     | 1.14E-152 | 0.635  | 0.779 | 0.495 | 2.28E-149 | Preadipocytes_2 |
| Ptprk.1     | 2.40E-152 | 0.581  | 0.630 | 0.38  | 4.80E-149 | Preadipocytes_2 |
| Msrb3.1     | 4.26E-151 | 0.576  | 0.705 | 0.458 | 8.53E-148 | Preadipocytes_2 |
| Ptpm.1      | 7.67E-151 | 0.610  | 0.894 | 0.761 | 1.53E-147 | Preadipocytes_2 |
| C3ar1.1     | 5.79E-150 | -0.568 | 0.006 | 0.356 | 1.16E-146 | Preadipocytes_2 |
| Lpl.2       | 6.62E-150 | -1.411 | 0.358 | 0.617 | 1.32E-146 | Preadipocytes_2 |
| Mafb.2      | 4.52E-149 | -0.938 | 0.081 | 0.396 | 9.05E-146 | Preadipocytes_2 |
| Tnfrsf11a.2 | 1.37E-147 | -1.087 | 0.268 | 0.49  | 2.75E-144 | Preadipocytes_2 |
| Zranb3.1    | 4.27E-147 | -0.580 | 0.120 | 0.367 | 8.53E-144 | Preadipocytes_2 |
| Lyve1.2     | 1.12E-146 | -0.558 | 0.050 | 0.308 | 2.24E-143 | Preadipocytes_2 |
| Lgals3.2    | 3.45E-146 | -1.630 | 0.027 | 0.372 | 6.90E-143 | Preadipocytes_2 |
| Arhgap25.2  | 5.15E-143 | -1.227 | 0.154 | 0.444 | 1.03E-139 | Preadipocytes_2 |
| Tcirg1.1    | 1.87E-141 | -0.632 | 0.114 | 0.403 | 3.74E-138 | Preadipocytes_2 |
| Ptprd.1     | 2.48E-140 | 0.546  | 0.805 | 0.549 | 4.97E-137 | Preadipocytes_2 |
| Figl.1      | 7.91E-140 | 0.765  | 0.637 | 0.41  | 1.58E-136 | Preadipocytes_2 |
| Ralgapa2.2  | 4.65E-139 | -1.212 | 0.374 | 0.662 | 9.30E-136 | Preadipocytes_2 |
| Myo1d.2     | 4.86E-139 | 0.759  | 0.559 | 0.36  | 9.73E-136 | Preadipocytes_2 |
| Gria4.2     | 1.23E-138 | 2.462  | 0.539 | 0.348 | 2.46E-135 | Preadipocytes_2 |
| Rap1gap2.1  | 5.43E-137 | -0.623 | 0.142 | 0.352 | 1.09E-133 | Preadipocytes_2 |
| Gabre.2     | 1.69E-135 | 0.521  | 0.550 | 0.313 | 3.39E-132 | Preadipocytes_2 |
| Calm2.1     | 2.66E-135 | -0.697 | 0.182 | 0.505 | 5.32E-132 | Preadipocytes_2 |
| Nceh1.1     | 1.92E-134 | -0.943 | 0.104 | 0.421 | 3.83E-131 | Preadipocytes_2 |



|            |           |        |       |       |           |                 |
|------------|-----------|--------|-------|-------|-----------|-----------------|
| Stab1.2    | 3.64E-134 | -1.125 | 0.365 | 0.5   | 7.27E-131 | Preadipocytes_2 |
| Zfp385b.1  | 5.77E-133 | 0.690  | 0.508 | 0.3   | 1.15E-129 | Preadipocytes_2 |
| Atp6v1a.1  | 4.28E-132 | -0.677 | 0.246 | 0.546 | 8.56E-129 | Preadipocytes_2 |
| Adap2.1    | 1.93E-131 | -1.003 | 0.452 | 0.594 | 3.85E-128 | Preadipocytes_2 |
| Pde1a.2    | 4.04E-131 | 0.706  | 0.679 | 0.455 | 8.08E-128 | Preadipocytes_2 |
| Tns3.1     | 7.03E-131 | -0.855 | 0.346 | 0.52  | 1.41E-127 | Preadipocytes_2 |
| Gm.2       | 1.14E-130 | -0.811 | 0.120 | 0.42  | 2.29E-127 | Preadipocytes_2 |
| Rel.1      | 2.30E-130 | -0.596 | 0.043 | 0.374 | 4.59E-127 | Preadipocytes_2 |
| Sipa1l1.2  | 3.01E-129 | -0.961 | 0.358 | 0.615 | 6.02E-126 | Preadipocytes_2 |
| Cdk6.2     | 2.60E-128 | -0.735 | 0.338 | 0.532 | 5.19E-125 | Preadipocytes_2 |
| Retnla.2   | 1.83E-127 | -1.588 | 0.039 | 0.338 | 3.67E-124 | Preadipocytes_2 |
| Cd300lb.2  | 5.83E-127 | -0.783 | 0.100 | 0.408 | 1.17E-123 | Preadipocytes_2 |
| Sema3a.1   | 3.68E-125 | 0.842  | 0.540 | 0.323 | 7.36E-122 | Preadipocytes_2 |
| Sdc2.2     | 6.86E-125 | 0.888  | 0.700 | 0.559 | 1.37E-121 | Preadipocytes_2 |
| Sfrp4.2    | 1.23E-124 | 1.181  | 0.523 | 0.239 | 2.46E-121 | Preadipocytes_2 |
| Slc37a2.1  | 1.30E-124 | -0.559 | 0.060 | 0.364 | 2.61E-121 | Preadipocytes_2 |
| Stox2.1    | 2.36E-124 | 0.698  | 0.609 | 0.424 | 4.72E-121 | Preadipocytes_2 |
| Tbc1d4.2   | 4.90E-124 | -0.848 | 0.588 | 0.797 | 9.79E-121 | Preadipocytes_2 |
| Myo1b      | 2.20E-123 | 0.603  | 0.459 | 0.253 | 4.39E-120 | Preadipocytes_2 |
| Aspn.2     | 3.22E-123 | 0.680  | 0.636 | 0.361 | 6.44E-120 | Preadipocytes_2 |
| Atp6v0a1.2 | 5.13E-123 | -1.061 | 0.450 | 0.696 | 1.03E-119 | Preadipocytes_2 |
| Kctd12.2   | 1.29E-122 | -0.643 | 0.044 | 0.322 | 2.58E-119 | Preadipocytes_2 |
| Gcnt1.1    | 3.58E-122 | -0.514 | 0.151 | 0.391 | 7.16E-119 | Preadipocytes_2 |
| Mmp12.1    | 4.66E-121 | -0.812 | 0.003 | 0.254 | 9.32E-118 | Preadipocytes_2 |
| Sfrp2      | 6.06E-121 | 1.153  | 0.408 | 0.1   | 1.21E-117 | Preadipocytes_2 |
| Hexa.2     | 2.28E-120 | -0.687 | 0.162 | 0.448 | 4.55E-117 | Preadipocytes_2 |
| Slit2      | 4.42E-120 | 0.870  | 0.535 | 0.306 | 8.83E-117 | Preadipocytes_2 |
| Wwtr1.1    | 4.58E-120 | 0.538  | 0.724 | 0.493 | 9.17E-117 | Preadipocytes_2 |
| Cd44.2     | 5.89E-120 | -1.378 | 0.305 | 0.532 | 1.18E-116 | Preadipocytes_2 |
| Me1.2      | 2.29E-119 | -1.001 | 0.128 | 0.272 | 4.58E-116 | Preadipocytes_2 |
| Cdh19      | 6.49E-119 | 0.554  | 0.418 | 0.176 | 1.30E-115 | Preadipocytes_2 |
| Eepd1.2    | 5.16E-117 | -1.422 | 0.121 | 0.421 | 1.03E-113 | Preadipocytes_2 |
| Kcnk13.2   | 1.50E-116 | -1.126 | 0.354 | 0.496 | 3.00E-113 | Preadipocytes_2 |
| Epsti1.2   | 5.95E-116 | -1.557 | 0.385 | 0.502 | 1.19E-112 | Preadipocytes_2 |
| Diaph3.1   | 7.71E-116 | -0.827 | 0.342 | 0.551 | 1.54E-112 | Preadipocytes_2 |
| Tsc22d3.2  | 1.78E-115 | -1.088 | 0.310 | 0.565 | 3.56E-112 | Preadipocytes_2 |
| Irs1.1     | 2.49E-115 | 0.869  | 0.649 | 0.425 | 4.97E-112 | Preadipocytes_2 |
| Nalcn      | 3.49E-115 | 1.266  | 0.435 | 0.156 | 6.97E-112 | Preadipocytes_2 |
| Cfp.2      | 8.07E-115 | -0.671 | 0.016 | 0.318 | 1.61E-111 | Preadipocytes_2 |
| Ms4a7.2    | 5.77E-114 | -0.657 | 0.259 | 0.44  | 1.15E-110 | Preadipocytes_2 |
| Cd180.2    | 8.71E-114 | -0.874 | 0.053 | 0.376 | 1.74E-110 | Preadipocytes_2 |
| Cotl1.2    | 1.37E-112 | -0.743 | 0.030 | 0.38  | 2.74E-109 | Preadipocytes_2 |
| Nxn.1      | 5.38E-112 | 0.739  | 0.566 | 0.432 | 1.08E-108 | Preadipocytes_2 |
| Nhs        | 1.37E-111 | 0.875  | 0.470 | 0.227 | 2.74E-108 | Preadipocytes_2 |
| Sort1.2    | 1.58E-110 | -0.731 | 0.133 | 0.409 | 3.15E-107 | Preadipocytes_2 |
| Xkr4.1     | 2.20E-110 | 0.882  | 0.634 | 0.44  | 4.40E-107 | Preadipocytes_2 |
| Apod.2     | 3.01E-110 | 0.993  | 0.497 | 0.224 | 6.02E-107 | Preadipocytes_2 |
| Clec4a2.1  | 9.17E-110 | -0.541 | 0.004 | 0.326 | 1.83E-106 | Preadipocytes_2 |
| Piezo2     | 2.46E-107 | 0.701  | 0.374 | 0.148 | 4.92E-104 | Preadipocytes_2 |
| Soat1.2    | 2.89E-107 | -0.633 | 0.122 | 0.381 | 5.78E-104 | Preadipocytes_2 |
| Slc11a1.1  | 9.11E-106 | -0.542 | 0.011 | 0.327 | 1.82E-102 | Preadipocytes_2 |
| Cadm1.2    | 7.45E-104 | -1.414 | 0.260 | 0.431 | 1.49E-100 | Preadipocytes_2 |
| C1qb.2     | 1.18E-103 | -1.004 | 0.042 | 0.352 | 2.37E-100 | Preadipocytes_2 |
| Adam8.1    | 1.35E-103 | -0.547 | 0.005 | 0.28  | 2.69E-100 | Preadipocytes_2 |
| Ctsl.2     | 1.22E-102 | -0.677 | 0.101 | 0.36  | 2.43E-99  | Preadipocytes_2 |
| Lipa.1     | 1.55E-102 | -0.993 | 0.053 | 0.356 | 3.10E-99  | Preadipocytes_2 |
| Slc7a8.1   | 2.94E-102 | -0.516 | 0.277 | 0.438 | 5.88E-99  | Preadipocytes_2 |
| Akr1a1.1   | 1.56E-101 | -0.556 | 0.142 | 0.431 | 3.12E-98  | Preadipocytes_2 |
| Chrm3      | 5.02E-101 | 1.100  | 0.412 | 0.174 | 1.00E-97  | Preadipocytes_2 |
| Tnip3.1    | 6.67E-101 | -0.691 | 0.017 | 0.3   | 1.33E-97  | Preadipocytes_2 |
| Fnbp1l.2   | 2.83E-100 | -0.620 | 0.210 | 0.444 | 5.66E-97  | Preadipocytes_2 |
| Abcg1.1    | 7.84E-99  | -0.620 | 0.116 | 0.352 | 1.57E-95  | Preadipocytes_2 |

|            |          |        |       |       |          |                 |
|------------|----------|--------|-------|-------|----------|-----------------|
| Sema5a.1   | 1.94E-98 | 0.865  | 0.523 | 0.334 | 3.88E-95 | Preadipocytes_2 |
| Fcer1g.1   | 6.15E-98 | -0.549 | 0.011 | 0.308 | 1.23E-94 | Preadipocytes_2 |
| Prkcb.2    | 1.97E-97 | -1.108 | 0.369 | 0.485 | 3.93E-94 | Preadipocytes_2 |
| Clec12a.1  | 1.13E-96 | -0.615 | 0.006 | 0.331 | 2.26E-93 | Preadipocytes_2 |
| Ccl9.1     | 2.74E-96 | -0.554 | 0.011 | 0.317 | 5.47E-93 | Preadipocytes_2 |
| Itm2b.1    | 2.62E-95 | -0.652 | 0.349 | 0.601 | 5.24E-92 | Preadipocytes_2 |
| Ms4a6c.2   | 1.31E-94 | -0.900 | 0.255 | 0.42  | 2.62E-91 | Preadipocytes_2 |
| Gpx3       | 1.71E-94 | 0.865  | 0.375 | 0.069 | 3.42E-91 | Preadipocytes_2 |
| Cd226.2    | 1.40E-93 | -1.016 | 0.022 | 0.297 | 2.80E-90 | Preadipocytes_2 |
| Snhg11.1   | 8.28E-92 | -0.715 | 0.234 | 0.322 | 1.66E-88 | Preadipocytes_2 |
| Adipor2.2  | 3.20E-91 | -1.383 | 0.138 | 0.429 | 6.40E-88 | Preadipocytes_2 |
| Negr1.2    | 8.66E-91 | -1.283 | 0.667 | 0.775 | 1.73E-87 | Preadipocytes_2 |
| Cd9.2      | 1.01E-90 | 0.773  | 0.476 | 0.277 | 2.03E-87 | Preadipocytes_2 |
| Pag1.2     | 2.65E-90 | -0.560 | 0.276 | 0.472 | 5.29E-87 | Preadipocytes_2 |
| Dock5.1    | 1.05E-89 | -0.520 | 0.183 | 0.419 | 2.09E-86 | Preadipocytes_2 |
| Dchs2      | 1.14E-89 | 0.711  | 0.388 | 0.16  | 2.28E-86 | Preadipocytes_2 |
| Prune2.1   | 1.37E-89 | -0.535 | 0.339 | 0.473 | 2.73E-86 | Preadipocytes_2 |
| Chn2.2     | 4.43E-89 | -1.149 | 0.399 | 0.566 | 8.85E-86 | Preadipocytes_2 |
| Grem2      | 5.27E-89 | 0.731  | 0.366 | 0.124 | 1.05E-85 | Preadipocytes_2 |
| Abtb2.1    | 2.36E-88 | 0.809  | 0.521 | 0.37  | 4.72E-85 | Preadipocytes_2 |
| Slc25a13.1 | 6.19E-88 | -0.571 | 0.109 | 0.382 | 1.24E-84 | Preadipocytes_2 |
| Calcr1.2   | 7.17E-88 | -0.713 | 0.496 | 0.678 | 1.43E-84 | Preadipocytes_2 |
| Kcnab1     | 8.91E-88 | 0.757  | 0.529 | 0.45  | 1.78E-84 | Preadipocytes_2 |
| Hmcn1      | 6.04E-87 | 0.583  | 0.367 | 0.136 | 1.21E-83 | Preadipocytes_2 |
| Ctsz.1     | 1.11E-84 | -0.547 | 0.052 | 0.345 | 2.22E-81 | Preadipocytes_2 |
| Cyp7b1     | 3.27E-83 | 0.518  | 0.416 | 0.23  | 6.55E-80 | Preadipocytes_2 |
| Ftl1.2     | 9.70E-83 | -0.768 | 0.051 | 0.36  | 1.94E-79 | Preadipocytes_2 |
| Ctsd.1     | 3.74E-82 | -1.119 | 0.050 | 0.355 | 7.48E-79 | Preadipocytes_2 |
| Selenop.2  | 3.88E-82 | -0.892 | 0.324 | 0.516 | 7.75E-79 | Preadipocytes_2 |
| Gm5150.1   | 5.87E-82 | -0.548 | 0.128 | 0.344 | 1.17E-78 | Preadipocytes_2 |
| Ptchd1.1   | 1.19E-81 | -0.531 | 0.155 | 0.366 | 2.37E-78 | Preadipocytes_2 |
| Ccr2.2     | 6.76E-81 | -1.237 | 0.017 | 0.311 | 1.35E-77 | Preadipocytes_2 |
| Aoah.2     | 7.12E-81 | -0.895 | 0.396 | 0.483 | 1.42E-77 | Preadipocytes_2 |
| Samsn1.1   | 2.02E-80 | -0.569 | 0.012 | 0.292 | 4.04E-77 | Preadipocytes_2 |
| Cxcl14     | 2.12E-80 | 0.698  | 0.315 | 0.012 | 4.23E-77 | Preadipocytes_2 |
| Tnik       | 3.32E-80 | 0.628  | 0.527 | 0.378 | 6.63E-77 | Preadipocytes_2 |
| Abca8b.2   | 3.46E-80 | 0.932  | 0.582 | 0.427 | 6.93E-77 | Preadipocytes_2 |
| Clec4b1.1  | 1.70E-79 | -0.553 | 0.006 | 0.312 | 3.40E-76 | Preadipocytes_2 |
| Nap1l1.2   | 2.40E-79 | -0.562 | 0.140 | 0.404 | 4.79E-76 | Preadipocytes_2 |
| Malt1.1    | 5.96E-77 | -0.679 | 0.300 | 0.517 | 1.19E-73 | Preadipocytes_2 |
| Atp1a1.2   | 6.25E-77 | -0.546 | 0.055 | 0.344 | 1.25E-73 | Preadipocytes_2 |
| Ccn2.1     | 2.63E-76 | 0.655  | 0.405 | 0.145 | 5.26E-73 | Preadipocytes_2 |
| Inmt       | 7.29E-76 | 1.170  | 0.391 | 0.098 | 1.46E-72 | Preadipocytes_2 |
| B4gal5.2   | 9.37E-76 | -0.537 | 0.399 | 0.578 | 1.87E-72 | Preadipocytes_2 |
| Csmd1.1    | 9.46E-76 | 2.038  | 0.461 | 0.263 | 1.89E-72 | Preadipocytes_2 |
| Plxna4.2   | 2.32E-75 | -0.732 | 0.404 | 0.495 | 4.64E-72 | Preadipocytes_2 |
| Ctsa.1     | 2.15E-74 | -0.501 | 0.061 | 0.298 | 4.30E-71 | Preadipocytes_2 |
| Adcy5.2    | 2.69E-74 | -0.508 | 0.202 | 0.264 | 5.38E-71 | Preadipocytes_2 |
| Col4a5.2   | 3.34E-74 | 0.717  | 0.586 | 0.46  | 6.69E-71 | Preadipocytes_2 |
| Ms4a6b.2   | 1.37E-73 | -0.670 | 0.264 | 0.407 | 2.74E-70 | Preadipocytes_2 |
| Myo1e.1    | 1.74E-73 | -1.243 | 0.562 | 0.697 | 3.47E-70 | Preadipocytes_2 |
| Emb.2      | 2.07E-73 | -0.673 | 0.277 | 0.464 | 4.14E-70 | Preadipocytes_2 |
| Gusb.1     | 3.06E-73 | -0.550 | 0.047 | 0.304 | 6.12E-70 | Preadipocytes_2 |
| Astn2      | 9.52E-73 | 0.717  | 0.373 | 0.2   | 1.90E-69 | Preadipocytes_2 |
| Pparg.2    | 1.44E-72 | -1.077 | 0.430 | 0.624 | 2.89E-69 | Preadipocytes_2 |
| Stap1.1    | 1.79E-72 | -0.549 | 0.045 | 0.324 | 3.58E-69 | Preadipocytes_2 |
| C9orf72.2  | 2.14E-71 | -0.866 | 0.067 | 0.347 | 4.28E-68 | Preadipocytes_2 |
| Nav2.2     | 9.97E-71 | -0.616 | 0.302 | 0.457 | 1.99E-67 | Preadipocytes_2 |
| Anxa2.2    | 1.15E-70 | -0.763 | 0.353 | 0.567 | 2.30E-67 | Preadipocytes_2 |
| Abcg3.2    | 4.57E-70 | -0.727 | 0.190 | 0.344 | 9.14E-67 | Preadipocytes_2 |
| Plxnc1.2   | 6.94E-70 | -0.708 | 0.189 | 0.386 | 1.39E-66 | Preadipocytes_2 |
| Sorbs1.2   | 1.77E-69 | -2.549 | 0.201 | 0.319 | 3.53E-66 | Preadipocytes_2 |

|            |          |        |       |       |          |                 |
|------------|----------|--------|-------|-------|----------|-----------------|
| Mertk.1    | 2.50E-68 | -0.975 | 0.506 | 0.588 | 5.00E-65 | Preadipocytes_2 |
| Dnm3.1     | 9.24E-68 | 0.623  | 0.689 | 0.624 | 1.85E-64 | Preadipocytes_2 |
| Pde7b.2    | 2.14E-67 | -0.576 | 0.674 | 0.809 | 4.29E-64 | Preadipocytes_2 |
| C1qa.2     | 2.94E-66 | -1.109 | 0.109 | 0.332 | 5.87E-63 | Preadipocytes_2 |
| Ncf1.1     | 5.18E-66 | -0.600 | 0.087 | 0.335 | 1.04E-62 | Preadipocytes_2 |
| Tank.2     | 9.30E-66 | -0.694 | 0.537 | 0.665 | 1.86E-62 | Preadipocytes_2 |
| Entpd1.2   | 9.77E-66 | -0.794 | 0.349 | 0.52  | 1.95E-62 | Preadipocytes_2 |
| Mpeg1.2    | 1.60E-64 | -0.550 | 0.001 | 0.273 | 3.21E-61 | Preadipocytes_2 |
| Gpnmb.2    | 9.48E-64 | -0.775 | 0.296 | 0.418 | 1.90E-60 | Preadipocytes_2 |
| Rasa1.2    | 7.97E-63 | -0.923 | 0.629 | 0.728 | 1.59E-59 | Preadipocytes_2 |
| Arid5b.2   | 1.11E-62 | -0.780 | 0.618 | 0.714 | 2.21E-59 | Preadipocytes_2 |
| C1qtnf7.2  | 1.69E-62 | 0.824  | 0.581 | 0.448 | 3.38E-59 | Preadipocytes_2 |
| Aff2.1     | 6.47E-62 | 0.915  | 0.567 | 0.408 | 1.29E-58 | Preadipocytes_2 |
| Ly6a.2     | 4.53E-61 | 0.643  | 0.531 | 0.297 | 9.06E-58 | Preadipocytes_2 |
| Chsy3      | 1.68E-60 | 0.775  | 0.556 | 0.479 | 3.35E-57 | Preadipocytes_2 |
| Dok2.1     | 1.86E-60 | -0.595 | 0.073 | 0.321 | 3.72E-57 | Preadipocytes_2 |
| Optn.2     | 2.54E-58 | -0.664 | 0.118 | 0.309 | 5.09E-55 | Preadipocytes_2 |
| Bank1.2    | 3.90E-58 | -0.953 | 0.299 | 0.404 | 7.79E-55 | Preadipocytes_2 |
| Errfi1.2   | 5.30E-58 | 0.759  | 0.610 | 0.516 | 1.06E-54 | Preadipocytes_2 |
| Itgb2.2    | 3.43E-57 | -0.586 | 0.005 | 0.297 | 6.86E-54 | Preadipocytes_2 |
| Lrrtm3     | 6.25E-57 | 0.740  | 0.383 | 0.172 | 1.25E-53 | Preadipocytes_2 |
| Lhfp12.2   | 4.66E-56 | -0.624 | 0.332 | 0.486 | 9.31E-53 | Preadipocytes_2 |
| Dact2.2    | 7.38E-56 | -0.548 | 0.185 | 0.266 | 1.48E-52 | Preadipocytes_2 |
| Trf.1      | 3.19E-55 | -0.657 | 0.020 | 0.323 | 6.38E-52 | Preadipocytes_2 |
| Fgr.1      | 6.07E-53 | -0.525 | 0.023 | 0.272 | 1.21E-49 | Preadipocytes_2 |
| F13a1.1    | 2.36E-52 | -2.257 | 0.544 | 0.566 | 4.73E-49 | Preadipocytes_2 |
| Hpgd       | 6.72E-51 | 0.559  | 0.624 | 0.545 | 1.34E-47 | Preadipocytes_2 |
| Vit        | 1.05E-50 | 0.913  | 0.417 | 0.196 | 2.11E-47 | Preadipocytes_2 |
| Vcl.2      | 6.96E-50 | -0.507 | 0.418 | 0.602 | 1.39E-46 | Preadipocytes_2 |
| Fat3.2     | 1.86E-49 | -0.910 | 0.262 | 0.387 | 3.73E-46 | Preadipocytes_2 |
| Fcrs1      | 1.87E-49 | -0.512 | 0.006 | 0.271 | 3.73E-46 | Preadipocytes_2 |
| Lpgat1.2   | 2.58E-47 | -1.920 | 0.144 | 0.386 | 5.16E-44 | Preadipocytes_2 |
| Tspan11    | 4.65E-47 | 0.817  | 0.376 | 0.155 | 9.30E-44 | Preadipocytes_2 |
| Vcam1      | 1.89E-46 | 0.530  | 0.482 | 0.416 | 3.77E-43 | Preadipocytes_2 |
| Fabp4.2    | 1.25E-45 | -0.558 | 0.335 | 0.5   | 2.50E-42 | Preadipocytes_2 |
| Dram1.2    | 1.70E-42 | -0.819 | 0.113 | 0.282 | 3.40E-39 | Preadipocytes_2 |
| Greb1l     | 1.97E-42 | 0.730  | 0.413 | 0.313 | 3.94E-39 | Preadipocytes_2 |
| Cita.2     | 2.35E-42 | -0.787 | 0.182 | 0.324 | 4.70E-39 | Preadipocytes_2 |
| Dmd.2      | 7.59E-42 | 0.502  | 0.641 | 0.526 | 1.52E-38 | Preadipocytes_2 |
| Tes.2      | 2.08E-41 | -0.517 | 0.140 | 0.35  | 4.15E-38 | Preadipocytes_2 |
| Hacd2.2    | 2.08E-40 | -1.605 | 0.106 | 0.326 | 4.16E-37 | Preadipocytes_2 |
| Col8a1.2   | 2.97E-40 | 0.960  | 0.485 | 0.341 | 5.94E-37 | Preadipocytes_2 |
| Ywhab.2    | 1.29E-38 | -0.575 | 0.172 | 0.395 | 2.57E-35 | Preadipocytes_2 |
| Igfbp6.2   | 2.09E-38 | 0.608  | 0.476 | 0.242 | 4.18E-35 | Preadipocytes_2 |
| Inpp4b.1   | 4.52E-38 | -0.972 | 0.405 | 0.529 | 9.04E-35 | Preadipocytes_2 |
| Trim25.2   | 4.78E-38 | -0.651 | 0.387 | 0.504 | 9.57E-35 | Preadipocytes_2 |
| Ell2.2     | 1.45E-37 | -0.521 | 0.459 | 0.602 | 2.91E-34 | Preadipocytes_2 |
| Cbfa2t3.1  | 2.76E-37 | -0.514 | 0.181 | 0.32  | 5.52E-34 | Preadipocytes_2 |
| Slc25a21.2 | 2.93E-37 | 0.620  | 0.413 | 0.247 | 5.86E-34 | Preadipocytes_2 |
| Arap2.2    | 3.15E-37 | -0.554 | 0.134 | 0.278 | 6.30E-34 | Preadipocytes_2 |
| Mgl2.2     | 1.87E-34 | -0.686 | 0.022 | 0.276 | 3.74E-31 | Preadipocytes_2 |
| Card11.1   | 1.72E-32 | -0.642 | 0.259 | 0.354 | 3.45E-29 | Preadipocytes_2 |
| Fnip2.2    | 1.37E-30 | -0.596 | 0.656 | 0.765 | 2.74E-27 | Preadipocytes_2 |
| Igfbp5.2   | 2.62E-30 | -0.769 | 0.384 | 0.404 | 5.23E-27 | Preadipocytes_2 |
| Chpt1.2    | 3.16E-29 | -1.339 | 0.113 | 0.257 | 6.31E-26 | Preadipocytes_2 |
| C1qc.1     | 9.69E-29 | -0.752 | 0.077 | 0.277 | 1.94E-25 | Preadipocytes_2 |
| Pitpnc1.2  | 7.07E-28 | -0.985 | 0.718 | 0.723 | 1.41E-24 | Preadipocytes_2 |
| C3.2       | 7.73E-28 | 0.535  | 0.460 | 0.261 | 1.55E-24 | Preadipocytes_2 |
| Ighm.2     | 1.77E-27 | -0.559 | 0.014 | 0.278 | 3.55E-24 | Preadipocytes_2 |
| Dusp10.1   | 1.06E-26 | -0.564 | 0.177 | 0.369 | 2.13E-23 | Preadipocytes_2 |
| Plcx3.2    | 2.49E-26 | 1.543  | 0.455 | 0.347 | 4.97E-23 | Preadipocytes_2 |
| Efna5.2    | 3.12E-26 | -1.210 | 0.602 | 0.651 | 6.23E-23 | Preadipocytes_2 |

|             |           |        |       |       |             |                 |
|-------------|-----------|--------|-------|-------|-------------|-----------------|
| Ddx60.2     | 8.81E-26  | -0.516 | 0.578 | 0.675 | 1.76E-22    | Preadipocytes_2 |
| Myoc        | 2.67E-25  | 0.520  | 0.330 | 0.166 | 5.35E-22    | Preadipocytes_2 |
| Jazf1.1     | 1.50E-24  | 0.518  | 0.554 | 0.505 | 3.00E-21    | Preadipocytes_2 |
| Adgre4.2    | 1.78E-22  | -0.715 | 0.172 | 0.315 | 3.56E-19    | Preadipocytes_2 |
| Fam126b.2   | 7.75E-22  | -0.969 | 0.199 | 0.37  | 1.55E-18    | Preadipocytes_2 |
| Ano3.2      | 9.18E-22  | -0.699 | 0.419 | 0.471 | 1.84E-18    | Preadipocytes_2 |
| Coro2a.1    | 7.90E-18  | -0.574 | 0.228 | 0.327 | 1.58E-14    | Preadipocytes_2 |
| Sik2.2      | 1.46E-16  | -1.099 | 0.559 | 0.64  | 2.92E-13    | Preadipocytes_2 |
| Gas6.2      | 4.24E-16  | 0.561  | 0.502 | 0.443 | 8.48E-13    | Preadipocytes_2 |
| 2810004N23R | 7.99E-16  | -0.623 | 0.162 | 0.335 | 1.60E-12    | Preadipocytes_2 |
| Nrg2.1      | 8.68E-16  | -0.518 | 0.417 | 0.424 | 1.74E-12    | Preadipocytes_2 |
| Hmgcs2      | 1.45E-15  | 0.513  | 0.314 | 0.134 | 2.89E-12    | Preadipocytes_2 |
| Dkk2.2      | 3.56E-15  | 1.164  | 0.429 | 0.347 | 7.11E-12    | Preadipocytes_2 |
| P3h2.2      | 2.37E-14  | -0.765 | 0.441 | 0.435 | 4.74E-11    | Preadipocytes_2 |
| Cd163.2     | 4.25E-14  | -1.274 | 0.442 | 0.44  | 8.50E-11    | Preadipocytes_2 |
| Mecom       | 1.44E-13  | 1.064  | 0.457 | 0.427 | 2.89E-10    | Preadipocytes_2 |
| Slc1a5.2    | 2.35E-13  | -0.734 | 0.591 | 0.465 | 4.70E-10    | Preadipocytes_2 |
| Cat.2       | 1.80E-12  | -0.680 | 0.103 | 0.298 | 3.60E-09    | Preadipocytes_2 |
| Acsf1.1     | 3.02E-12  | -2.815 | 0.059 | 0.26  | 6.04E-09    | Preadipocytes_2 |
| Car8.2      | 2.32E-11  | -0.609 | 0.363 | 0.353 | 4.64E-08    | Preadipocytes_2 |
| Ednrb.2     | 3.93E-11  | -0.761 | 0.398 | 0.403 | 7.87E-08    | Preadipocytes_2 |
| Cilp        | 7.86E-11  | 0.913  | 0.321 | 0.139 | 1.57E-07    | Preadipocytes_2 |
| Acox1.2     | 9.27E-11  | -0.833 | 0.283 | 0.397 | 1.85E-07    | Preadipocytes_2 |
| Mpp7.2      | 3.29E-10  | -1.387 | 0.213 | 0.321 | 6.59E-07    | Preadipocytes_2 |
| Aldh1a3.2   | 4.23E-10  | -0.533 | 0.346 | 0.318 | 8.46E-07    | Preadipocytes_2 |
| Tns1.1      | 1.37E-09  | -0.512 | 0.838 | 0.863 | 2.73E-06    | Preadipocytes_2 |
| Sntg1.2     | 1.25E-08  | -0.511 | 0.594 | 0.565 | 2.50E-05    | Preadipocytes_2 |
| Mctp2.1     | 3.19E-08  | -0.513 | 0.372 | 0.379 | 6.37E-05    | Preadipocytes_2 |
| Thsd4.2     | 2.98E-07  | -0.633 | 0.270 | 0.285 | 0.000596857 | Preadipocytes_2 |
| Bckdhhb.2   | 1.35E-06  | -0.845 | 0.476 | 0.555 | 0.00269319  | Preadipocytes_2 |
| Plekhhg5.1  | 1.46E-06  | -0.736 | 0.472 | 0.475 | 0.002924376 | Preadipocytes_2 |
| Fmr1.2      | 1.55E-06  | -0.689 | 0.254 | 0.377 | 0.003100398 | Preadipocytes_2 |
| Rorb.2      | 9.84E-05  | -0.705 | 0.483 | 0.52  | 0.196756885 | Preadipocytes_2 |
| Sema3e.2    | 0.000177  | -1.412 | 0.531 | 0.536 | 0.354035107 | Preadipocytes_2 |
| Tmem135.2   | 0.0002423 | -0.867 | 0.563 | 0.611 | 0.484653087 | Preadipocytes_2 |
| Mamdc2.2    | 0.0004946 | -0.686 | 0.418 | 0.397 | 0.989283882 | Preadipocytes_2 |
| Kcnq1       | 0.0028368 | -0.511 | 0.545 | 0.556 | 1           | Preadipocytes_2 |
| Prkar2b.2   | 0.0087947 | -2.212 | 0.199 | 0.295 | 1           | Preadipocytes_2 |
| Diaph3.2    | 4.47E-67  | 3.134  | 0.973 | 0.513 | 8.94E-64    | Preadipocytes_3 |
| Cenpp       | 4.37E-48  | 2.583  | 0.894 | 0.509 | 8.74E-45    | Preadipocytes_3 |
| Ezh2        | 1.76E-39  | 1.823  | 0.858 | 0.467 | 3.53E-36    | Preadipocytes_3 |
| Atad2       | 7.95E-39  | 1.763  | 0.841 | 0.479 | 1.59E-35    | Preadipocytes_3 |
| Vcan.2      | 4.66E-38  | 1.538  | 0.947 | 0.553 | 9.32E-35    | Preadipocytes_3 |
| Postn.3     | 3.22E-37  | 2.059  | 0.832 | 0.42  | 6.44E-34    | Preadipocytes_3 |
| Kif15       | 1.94E-36  | 1.548  | 0.717 | 0.298 | 3.88E-33    | Preadipocytes_3 |
| Neil3       | 1.20E-34  | 1.704  | 0.673 | 0.27  | 2.39E-31    | Preadipocytes_3 |
| Kn11        | 1.32E-34  | 1.615  | 0.690 | 0.279 | 2.63E-31    | Preadipocytes_3 |
| Kif4        | 1.34E-33  | 1.488  | 0.611 | 0.228 | 2.67E-30    | Preadipocytes_3 |
| Pola1.1     | 5.89E-33  | 1.711  | 0.867 | 0.648 | 1.18E-29    | Preadipocytes_3 |
| Top2a       | 1.74E-32  | 1.823  | 0.664 | 0.27  | 3.47E-29    | Preadipocytes_3 |
| Col1a1.2    | 9.18E-31  | 1.456  | 0.903 | 0.496 | 1.84E-27    | Preadipocytes_3 |
| Ncapg2      | 8.34E-30  | 1.641  | 0.690 | 0.331 | 1.67E-26    | Preadipocytes_3 |
| Mfap5.2     | 5.27E-29  | 1.200  | 0.938 | 0.52  | 1.05E-25    | Preadipocytes_3 |
| Col3a1.3    | 8.60E-29  | 1.234  | 1.000 | 0.734 | 1.72E-25    | Preadipocytes_3 |
| Anln        | 1.22E-28  | 1.882  | 0.673 | 0.321 | 2.44E-25    | Preadipocytes_3 |
| Zw1ch       | 1.39E-28  | 1.304  | 0.673 | 0.329 | 2.77E-25    | Preadipocytes_3 |
| Col1a2.3    | 1.90E-27  | 1.171  | 0.991 | 0.626 | 3.81E-24    | Preadipocytes_3 |
| Racgap1     | 1.91E-27  | 1.164  | 0.549 | 0.152 | 3.83E-24    | Preadipocytes_3 |
| Kif11       | 3.89E-26  | 1.465  | 0.637 | 0.287 | 7.78E-23    | Preadipocytes_3 |
| Tpx2        | 1.17E-25  | 1.352  | 0.593 | 0.266 | 2.33E-22    | Preadipocytes_3 |
| Arnt2       | 2.26E-25  | 0.772  | 0.460 | 0.13  | 4.53E-22    | Preadipocytes_3 |
| Dcl1.3      | 2.65E-24  | 1.372  | 0.867 | 0.601 | 5.29E-21    | Preadipocytes_3 |

|              |          |        |       |       |          |                 |
|--------------|----------|--------|-------|-------|----------|-----------------|
| Mki67        | 6.14E-24 | 1.296  | 0.611 | 0.28  | 1.23E-20 | Preadipocytes_3 |
| Smc2         | 2.35E-22 | 0.887  | 0.540 | 0.207 | 4.70E-19 | Preadipocytes_3 |
| Efcab11      | 5.61E-22 | 1.364  | 0.628 | 0.352 | 1.12E-18 | Preadipocytes_3 |
| Cenph        | 8.70E-22 | 1.076  | 0.522 | 0.191 | 1.74E-18 | Preadipocytes_3 |
| Mms22l       | 1.45E-21 | 1.571  | 0.708 | 0.469 | 2.90E-18 | Preadipocytes_3 |
| Adamts1.3    | 4.70E-21 | 1.453  | 0.912 | 0.737 | 9.39E-18 | Preadipocytes_3 |
| Cdh2         | 6.08E-21 | 1.231  | 0.540 | 0.235 | 1.22E-17 | Preadipocytes_3 |
| Ugdh.1       | 7.83E-21 | 1.318  | 0.788 | 0.459 | 1.57E-17 | Preadipocytes_3 |
| Kif20b       | 8.27E-21 | 1.109  | 0.540 | 0.255 | 1.65E-17 | Preadipocytes_3 |
| Sparc.2      | 1.15E-20 | 1.325  | 0.841 | 0.564 | 2.30E-17 | Preadipocytes_3 |
| Bub1         | 1.55E-20 | 0.884  | 0.425 | 0.12  | 3.10E-17 | Preadipocytes_3 |
| Lmnbl        | 4.37E-20 | 1.184  | 0.637 | 0.353 | 8.74E-17 | Preadipocytes_3 |
| Cit          | 6.95E-20 | 1.200  | 0.575 | 0.293 | 1.39E-16 | Preadipocytes_3 |
| Prc1         | 8.36E-20 | 1.268  | 0.522 | 0.241 | 1.67E-16 | Preadipocytes_3 |
| Csgalnact1.2 | 8.80E-20 | 1.180  | 0.779 | 0.556 | 1.76E-16 | Preadipocytes_3 |
| Smc4.1       | 9.63E-20 | 1.156  | 0.673 | 0.422 | 1.93E-16 | Preadipocytes_3 |
| Col5a3.2     | 1.35E-19 | 1.522  | 0.796 | 0.559 | 2.69E-16 | Preadipocytes_3 |
| Col8a1.3     | 1.89E-19 | 1.596  | 0.637 | 0.363 | 3.78E-16 | Preadipocytes_3 |
| Rbm47.3      | 2.03E-19 | -2.008 | 0.204 | 0.592 | 4.06E-16 | Preadipocytes_3 |
| Pcdh19.3     | 3.15E-19 | 1.036  | 0.796 | 0.536 | 6.30E-16 | Preadipocytes_3 |
| Shcbp1       | 3.37E-19 | 0.879  | 0.504 | 0.237 | 6.74E-16 | Preadipocytes_3 |
| Wdfy4.3      | 3.43E-19 | -1.171 | 0.027 | 0.419 | 6.86E-16 | Preadipocytes_3 |
| Kntc1        | 3.76E-19 | 1.087  | 0.496 | 0.205 | 7.51E-16 | Preadipocytes_3 |
| Depdc1a      | 4.57E-19 | 0.907  | 0.407 | 0.13  | 9.15E-16 | Preadipocytes_3 |
| Cd84.3       | 4.64E-19 | -1.753 | 0.071 | 0.472 | 9.28E-16 | Preadipocytes_3 |
| Bub1b        | 6.99E-19 | 0.716  | 0.407 | 0.137 | 1.40E-15 | Preadipocytes_3 |
| Pltp.2       | 1.55E-18 | -1.733 | 0.009 | 0.446 | 3.09E-15 | Preadipocytes_3 |
| Insyn2b.3    | 2.13E-18 | -0.905 | 0.053 | 0.429 | 4.27E-15 | Preadipocytes_3 |
| Slfn9        | 3.44E-18 | 0.675  | 0.398 | 0.151 | 6.89E-15 | Preadipocytes_3 |
| Mastl        | 3.82E-18 | 1.160  | 0.558 | 0.312 | 7.65E-15 | Preadipocytes_3 |
| Hdac9.2      | 4.91E-18 | -2.238 | 0.124 | 0.547 | 9.83E-15 | Preadipocytes_3 |
| Brip1        | 1.15E-17 | 1.485  | 0.611 | 0.395 | 2.31E-14 | Preadipocytes_3 |
| Ms4a6c.3     | 1.51E-17 | -0.973 | 0.009 | 0.396 | 3.01E-14 | Preadipocytes_3 |
| Iqgap3       | 2.51E-17 | 1.166  | 0.469 | 0.19  | 5.02E-14 | Preadipocytes_3 |
| Rad18.1      | 2.51E-17 | 1.040  | 0.673 | 0.471 | 5.02E-14 | Preadipocytes_3 |
| Fbln2.3      | 3.00E-17 | 0.818  | 0.788 | 0.451 | 6.00E-14 | Preadipocytes_3 |
| Ranbp17.1    | 3.39E-17 | 1.090  | 0.593 | 0.295 | 6.79E-14 | Preadipocytes_3 |
| Galnt17.3    | 6.94E-17 | 1.018  | 0.788 | 0.565 | 1.39E-13 | Preadipocytes_3 |
| Enah.1       | 1.07E-16 | 0.769  | 0.602 | 0.312 | 2.14E-13 | Preadipocytes_3 |
| Rad54b       | 1.53E-16 | 0.867  | 0.478 | 0.215 | 3.06E-13 | Preadipocytes_3 |
| Uhrf1        | 3.26E-16 | 0.556  | 0.372 | 0.128 | 6.53E-13 | Preadipocytes_3 |
| Itga4.3      | 3.43E-16 | -1.487 | 0.044 | 0.419 | 6.86E-13 | Preadipocytes_3 |
| Mtss1.2      | 3.79E-16 | -2.156 | 0.265 | 0.614 | 7.59E-13 | Preadipocytes_3 |
| Ctsc.2       | 5.14E-16 | -1.779 | 0.106 | 0.49  | 1.03E-12 | Preadipocytes_3 |
| Lgmn.3       | 5.77E-16 | -1.415 | 0.044 | 0.446 | 1.15E-12 | Preadipocytes_3 |
| Cd300a.3     | 6.53E-16 | -0.937 | 0.000 | 0.368 | 1.31E-12 | Preadipocytes_3 |
| Robo1.2      | 7.66E-16 | 0.768  | 0.796 | 0.564 | 1.53E-12 | Preadipocytes_3 |
| Myo1f.3      | 1.39E-15 | -2.057 | 0.159 | 0.519 | 2.78E-12 | Preadipocytes_3 |
| Csf2ra.3     | 2.03E-15 | -1.241 | 0.053 | 0.414 | 4.06E-12 | Preadipocytes_3 |
| Cenpe        | 2.99E-15 | 1.177  | 0.504 | 0.246 | 5.98E-12 | Preadipocytes_3 |
| Tead1.2      | 3.00E-15 | 0.737  | 0.885 | 0.668 | 6.00E-12 | Preadipocytes_3 |
| Cacna1c.1    | 3.18E-15 | 1.602  | 0.637 | 0.462 | 6.37E-12 | Preadipocytes_3 |
| Bmp6.2       | 3.73E-15 | 1.039  | 0.673 | 0.449 | 7.47E-12 | Preadipocytes_3 |
| Ect2         | 4.76E-15 | 1.397  | 0.549 | 0.331 | 9.52E-12 | Preadipocytes_3 |
| Col14a1.2    | 5.30E-15 | 0.728  | 0.885 | 0.668 | 1.06E-11 | Preadipocytes_3 |
| Blnk.3       | 6.07E-15 | -1.525 | 0.133 | 0.483 | 1.21E-11 | Preadipocytes_3 |
| Adgre1.3     | 7.24E-15 | -1.862 | 0.142 | 0.501 | 1.45E-11 | Preadipocytes_3 |
| Fyb.3        | 1.06E-14 | -2.040 | 0.177 | 0.531 | 2.13E-11 | Preadipocytes_3 |
| Mcm6         | 1.27E-14 | 0.568  | 0.407 | 0.217 | 2.53E-11 | Preadipocytes_3 |
| Arhgap25.3   | 1.48E-14 | -1.166 | 0.044 | 0.399 | 2.96E-11 | Preadipocytes_3 |
| Mertk.2      | 1.79E-14 | -1.430 | 0.221 | 0.577 | 3.58E-11 | Preadipocytes_3 |
| Ctss.3       | 1.93E-14 | -1.191 | 0.009 | 0.353 | 3.85E-11 | Preadipocytes_3 |

|             |          |        |       |       |          |                 |
|-------------|----------|--------|-------|-------|----------|-----------------|
| Myo1b.1     | 2.01E-14 | 0.807  | 0.513 | 0.285 | 4.01E-11 | Preadipocytes_3 |
| Tmtc2.2     | 2.67E-14 | 1.716  | 0.717 | 0.567 | 5.34E-11 | Preadipocytes_3 |
| Ncapg       | 2.85E-14 | 0.796  | 0.407 | 0.174 | 5.71E-11 | Preadipocytes_3 |
| Melk        | 3.55E-14 | 0.878  | 0.460 | 0.219 | 7.10E-11 | Preadipocytes_3 |
| Tnfrsf11a.3 | 3.72E-14 | -1.099 | 0.115 | 0.456 | 7.44E-11 | Preadipocytes_3 |
| Aoah.3      | 4.14E-14 | -0.978 | 0.124 | 0.471 | 8.28E-11 | Preadipocytes_3 |
| Lcp1.3      | 4.22E-14 | -1.680 | 0.124 | 0.468 | 8.44E-11 | Preadipocytes_3 |
| Brca1       | 5.03E-14 | 1.118  | 0.558 | 0.358 | 1.01E-10 | Preadipocytes_3 |
| Pik3ap1.2   | 5.76E-14 | -1.186 | 0.150 | 0.49  | 1.15E-10 | Preadipocytes_3 |
| Sdc2.3      | 9.27E-14 | 0.866  | 0.779 | 0.581 | 1.85E-10 | Preadipocytes_3 |
| Kif14       | 9.80E-14 | 0.655  | 0.354 | 0.125 | 1.96E-10 | Preadipocytes_3 |
| Ccr5.3      | 1.26E-13 | -0.804 | 0.018 | 0.35  | 2.52E-10 | Preadipocytes_3 |
| Adap2.2     | 1.32E-13 | -1.306 | 0.230 | 0.573 | 2.65E-10 | Preadipocytes_3 |
| Bgn.2       | 1.33E-13 | 0.855  | 0.540 | 0.228 | 2.65E-10 | Preadipocytes_3 |
| Ccl6.3      | 2.23E-13 | -1.120 | 0.018 | 0.338 | 4.47E-10 | Preadipocytes_3 |
| Il7r.3      | 2.39E-13 | -0.581 | 0.018 | 0.289 | 4.79E-10 | Preadipocytes_3 |
| Bard1       | 4.50E-13 | 1.116  | 0.496 | 0.319 | 9.01E-10 | Preadipocytes_3 |
| St8sia4.3   | 4.59E-13 | -1.306 | 0.088 | 0.411 | 9.17E-10 | Preadipocytes_3 |
| Hells       | 5.35E-13 | 1.285  | 0.566 | 0.398 | 1.07E-09 | Preadipocytes_3 |
| Col12a1.2   | 5.35E-13 | 0.816  | 0.628 | 0.381 | 1.07E-09 | Preadipocytes_3 |
| Sp1.3       | 7.11E-13 | -0.864 | 0.088 | 0.392 | 1.42E-09 | Preadipocytes_3 |
| Shtn1.3     | 7.63E-13 | -1.518 | 0.159 | 0.476 | 1.53E-09 | Preadipocytes_3 |
| Serpinh1.1  | 1.08E-12 | 0.782  | 0.558 | 0.259 | 2.16E-09 | Preadipocytes_3 |
| Pik3r5.3    | 1.14E-12 | -0.942 | 0.062 | 0.403 | 2.28E-09 | Preadipocytes_3 |
| Tec.3       | 1.34E-12 | -1.013 | 0.115 | 0.442 | 2.68E-09 | Preadipocytes_3 |
| Ncapd2      | 1.65E-12 | 1.039  | 0.540 | 0.382 | 3.31E-09 | Preadipocytes_3 |
| Incenp      | 1.67E-12 | 0.794  | 0.460 | 0.252 | 3.34E-09 | Preadipocytes_3 |
| Lyz2.3      | 1.91E-12 | -1.417 | 0.000 | 0.336 | 3.82E-09 | Preadipocytes_3 |
| Alcam.2     | 2.00E-12 | -2.731 | 0.221 | 0.53  | 3.99E-09 | Preadipocytes_3 |
| Cdca2       | 2.09E-12 | 1.090  | 0.496 | 0.295 | 4.18E-09 | Preadipocytes_3 |
| Itm2b.2     | 2.22E-12 | -1.213 | 0.177 | 0.563 | 4.44E-09 | Preadipocytes_3 |
| Igf1.2      | 2.57E-12 | -1.433 | 0.204 | 0.609 | 5.14E-09 | Preadipocytes_3 |
| F13a1.2     | 3.23E-12 | -2.910 | 0.265 | 0.565 | 6.46E-09 | Preadipocytes_3 |
| Clsn        | 3.77E-12 | 0.898  | 0.451 | 0.232 | 7.53E-09 | Preadipocytes_3 |
| Gfpt2.2     | 4.08E-12 | 0.539  | 0.832 | 0.563 | 8.16E-09 | Preadipocytes_3 |
| Ckap2       | 5.43E-12 | 1.097  | 0.478 | 0.277 | 1.09E-08 | Preadipocytes_3 |
| Apobec1.2   | 6.13E-12 | -2.053 | 0.195 | 0.542 | 1.23E-08 | Preadipocytes_3 |
| Nr3c2.1     | 6.49E-12 | -0.926 | 0.327 | 0.692 | 1.30E-08 | Preadipocytes_3 |
| Clec10a.3   | 6.60E-12 | -1.447 | 0.124 | 0.45  | 1.32E-08 | Preadipocytes_3 |
| Atp8b4.3    | 7.04E-12 | -1.243 | 0.053 | 0.387 | 1.41E-08 | Preadipocytes_3 |
| Plin2.2     | 7.77E-12 | -1.486 | 0.106 | 0.494 | 1.55E-08 | Preadipocytes_3 |
| Col6a3.1    | 9.12E-12 | 1.137  | 0.743 | 0.537 | 1.82E-08 | Preadipocytes_3 |
| Pde4d.2     | 1.29E-11 | -1.661 | 0.301 | 0.645 | 2.59E-08 | Preadipocytes_3 |
| Apoe.3      | 1.36E-11 | -2.658 | 0.195 | 0.51  | 2.72E-08 | Preadipocytes_3 |
| Slc6a6.2    | 1.52E-11 | -1.292 | 0.177 | 0.559 | 3.04E-08 | Preadipocytes_3 |
| Col6a2.1    | 1.91E-11 | 0.821  | 0.664 | 0.404 | 3.82E-08 | Preadipocytes_3 |
| Msr1.3      | 2.47E-11 | -0.723 | 0.106 | 0.397 | 4.93E-08 | Preadipocytes_3 |
| Gas6.3      | 3.48E-11 | -0.873 | 0.106 | 0.456 | 6.95E-08 | Preadipocytes_3 |
| Psap.3      | 4.22E-11 | -2.247 | 0.168 | 0.526 | 8.44E-08 | Preadipocytes_3 |
| Col6a1.2    | 4.24E-11 | 0.631  | 0.584 | 0.293 | 8.48E-08 | Preadipocytes_3 |
| Sgo2a       | 4.25E-11 | 0.792  | 0.398 | 0.19  | 8.50E-08 | Preadipocytes_3 |
| Epsti1.3    | 5.35E-11 | -1.591 | 0.195 | 0.485 | 1.07E-07 | Preadipocytes_3 |
| Cd248.2     | 6.42E-11 | 0.765  | 0.549 | 0.242 | 1.28E-07 | Preadipocytes_3 |
| Gna14       | 8.89E-11 | 0.726  | 0.416 | 0.224 | 1.78E-07 | Preadipocytes_3 |
| Trim59      | 9.32E-11 | 0.710  | 0.336 | 0.153 | 1.86E-07 | Preadipocytes_3 |
| Tns3.2      | 9.79E-11 | -0.936 | 0.168 | 0.494 | 1.96E-07 | Preadipocytes_3 |
| Mis18bp1    | 1.31E-10 | 1.035  | 0.478 | 0.306 | 2.63E-07 | Preadipocytes_3 |
| Pitpnc1.3   | 1.33E-10 | -1.728 | 0.513 | 0.724 | 2.66E-07 | Preadipocytes_3 |
| Cd36.3      | 1.45E-10 | -2.270 | 0.345 | 0.587 | 2.89E-07 | Preadipocytes_3 |
| Hpgds.2     | 1.63E-10 | -0.818 | 0.142 | 0.446 | 3.26E-07 | Preadipocytes_3 |
| Abhd12.3    | 1.63E-10 | -1.588 | 0.204 | 0.567 | 3.26E-07 | Preadipocytes_3 |
| Basp1.2     | 1.98E-10 | 0.732  | 0.655 | 0.488 | 3.97E-07 | Preadipocytes_3 |

|            |          |        |       |       |             |                 |
|------------|----------|--------|-------|-------|-------------|-----------------|
| Cacna1d.3  | 2.61E-10 | -1.033 | 0.159 | 0.479 | 5.22E-07    | Preadipocytes_3 |
| Ntn4.2     | 2.74E-10 | 0.664  | 0.628 | 0.4   | 5.47E-07    | Preadipocytes_3 |
| Cd200r1.3  | 3.15E-10 | -1.285 | 0.133 | 0.439 | 6.30E-07    | Preadipocytes_3 |
| Galnt18    | 3.29E-10 | 0.920  | 0.522 | 0.323 | 6.59E-07    | Preadipocytes_3 |
| Wdhd1      | 3.67E-10 | 0.818  | 0.469 | 0.348 | 7.33E-07    | Preadipocytes_3 |
| Pole       | 3.99E-10 | 0.977  | 0.478 | 0.319 | 7.98E-07    | Preadipocytes_3 |
| Kcnk13.3   | 4.03E-10 | -1.236 | 0.177 | 0.475 | 8.07E-07    | Preadipocytes_3 |
| Ms4a7.3    | 4.29E-10 | -0.650 | 0.133 | 0.412 | 8.59E-07    | Preadipocytes_3 |
| Ptpn22.3   | 5.60E-10 | -0.970 | 0.088 | 0.37  | 1.12E-06    | Preadipocytes_3 |
| C1qb.3     | 6.14E-10 | -0.989 | 0.018 | 0.303 | 1.23E-06    | Preadipocytes_3 |
| Cep55      | 6.70E-10 | 0.613  | 0.283 | 0.096 | 1.34E-06    | Preadipocytes_3 |
| Rin2.2     | 6.83E-10 | -0.792 | 0.451 | 0.736 | 1.37E-06    | Preadipocytes_3 |
| Mamdc2.3   | 7.02E-10 | -1.114 | 0.088 | 0.403 | 1.40E-06    | Preadipocytes_3 |
| Igfbp5.3   | 7.09E-10 | 0.633  | 0.681 | 0.399 | 1.42E-06    | Preadipocytes_3 |
| Ctsb.3     | 7.81E-10 | -1.753 | 0.142 | 0.462 | 1.56E-06    | Preadipocytes_3 |
| Kif18a     | 9.10E-10 | 0.614  | 0.398 | 0.263 | 1.82E-06    | Preadipocytes_3 |
| Nckap1l.3  | 9.97E-10 | -1.106 | 0.142 | 0.433 | 1.99E-06    | Preadipocytes_3 |
| C4b        | 1.21E-09 | -1.172 | 0.159 | 0.533 | 2.43E-06    | Preadipocytes_3 |
| Nrp2.3     | 1.33E-09 | -0.908 | 0.115 | 0.438 | 2.67E-06    | Preadipocytes_3 |
| Prss23.2   | 1.39E-09 | 0.706  | 0.531 | 0.237 | 2.77E-06    | Preadipocytes_3 |
| Abtb2.2    | 1.50E-09 | 0.645  | 0.558 | 0.394 | 3.00E-06    | Preadipocytes_3 |
| Gen1       | 2.48E-09 | 0.813  | 0.398 | 0.243 | 4.96E-06    | Preadipocytes_3 |
| Prkcb.3    | 2.62E-09 | -1.286 | 0.186 | 0.468 | 5.25E-06    | Preadipocytes_3 |
| Tacc3      | 2.67E-09 | 0.697  | 0.336 | 0.199 | 5.34E-06    | Preadipocytes_3 |
| Npas2.1    | 3.89E-09 | 0.708  | 0.513 | 0.359 | 7.77E-06    | Preadipocytes_3 |
| St18.3     | 3.90E-09 | -1.215 | 0.159 | 0.442 | 7.79E-06    | Preadipocytes_3 |
| Retnla.3   | 3.95E-09 | -1.663 | 0.000 | 0.291 | 7.90E-06    | Preadipocytes_3 |
| Ckap2l     | 4.16E-09 | 0.772  | 0.416 | 0.234 | 8.33E-06    | Preadipocytes_3 |
| Pde7b.3    | 4.27E-09 | -1.004 | 0.513 | 0.789 | 8.53E-06    | Preadipocytes_3 |
| Atp6v0d2.3 | 5.24E-09 | -1.315 | 0.168 | 0.427 | 1.05E-05    | Preadipocytes_3 |
| C1qa.3     | 7.03E-09 | -1.111 | 0.000 | 0.297 | 1.41E-05    | Preadipocytes_3 |
| Thrb.1     | 1.13E-08 | -1.030 | 0.584 | 0.808 | 2.26E-05    | Preadipocytes_3 |
| Piezo2.1   | 1.44E-08 | 0.641  | 0.345 | 0.184 | 2.87E-05    | Preadipocytes_3 |
| Dok2.2     | 1.62E-08 | -0.592 | 0.000 | 0.283 | 3.24E-05    | Preadipocytes_3 |
| Polq       | 1.79E-08 | 0.792  | 0.425 | 0.279 | 3.57E-05    | Preadipocytes_3 |
| Lgals3.3   | 1.83E-08 | -1.480 | 0.044 | 0.317 | 3.66E-05    | Preadipocytes_3 |
| Fcer1g.2   | 1.96E-08 | -0.504 | 0.000 | 0.261 | 3.92E-05    | Preadipocytes_3 |
| Cfp.3      | 1.99E-08 | -0.617 | 0.000 | 0.27  | 3.98E-05    | Preadipocytes_3 |
| Timp3.3    | 2.11E-08 | 0.599  | 0.664 | 0.443 | 4.21E-05    | Preadipocytes_3 |
| Slc27a1.3  | 2.16E-08 | -1.067 | 0.133 | 0.44  | 4.33E-05    | Preadipocytes_3 |
| Tnfrsf11b  | 2.32E-08 | 0.533  | 0.301 | 0.131 | 4.65E-05    | Preadipocytes_3 |
| Adgre4.3   | 2.72E-08 | -0.713 | 0.044 | 0.294 | 5.44E-05    | Preadipocytes_3 |
| Aplp2.3    | 3.76E-08 | -1.071 | 0.168 | 0.513 | 7.51E-05    | Preadipocytes_3 |
| Ccl9.2     | 4.28E-08 | -0.523 | 0.000 | 0.269 | 8.56E-05    | Preadipocytes_3 |
| Stap1.2    | 5.77E-08 | -0.516 | 0.027 | 0.28  | 0.000115491 | Preadipocytes_3 |
| Cadm1.3    | 6.10E-08 | -1.366 | 0.159 | 0.405 | 0.000121925 | Preadipocytes_3 |
| Lig1       | 6.13E-08 | 0.594  | 0.301 | 0.162 | 0.0001225   | Preadipocytes_3 |
| Nusap1     | 6.40E-08 | 0.892  | 0.442 | 0.302 | 0.000128055 | Preadipocytes_3 |
| Chd7.3     | 6.41E-08 | -0.648 | 0.115 | 0.394 | 0.000128233 | Preadipocytes_3 |
| Ncf1.2     | 6.84E-08 | -0.578 | 0.035 | 0.296 | 0.000136721 | Preadipocytes_3 |
| Cd300lb.3  | 8.07E-08 | -0.726 | 0.088 | 0.359 | 0.000161318 | Preadipocytes_3 |
| Ccr2.3     | 8.18E-08 | -1.200 | 0.018 | 0.264 | 0.000163528 | Preadipocytes_3 |
| Clybl.2    | 1.04E-07 | -0.530 | 0.283 | 0.623 | 0.000208721 | Preadipocytes_3 |
| Stab1.3    | 1.17E-07 | -1.145 | 0.239 | 0.48  | 0.000234695 | Preadipocytes_3 |
| Kif23      | 1.20E-07 | 0.688  | 0.381 | 0.242 | 0.000239355 | Preadipocytes_3 |
| Celf4.1    | 1.37E-07 | -0.540 | 0.071 | 0.334 | 0.000274176 | Preadipocytes_3 |
| Grk3.2     | 1.42E-07 | -0.587 | 0.115 | 0.361 | 0.000283584 | Preadipocytes_3 |
| Sirpa.3    | 1.45E-07 | -1.079 | 0.168 | 0.496 | 0.000289477 | Preadipocytes_3 |
| Atp6v0a1.3 | 1.45E-07 | -1.198 | 0.407 | 0.657 | 0.000290605 | Preadipocytes_3 |
| P3h2.3     | 1.48E-07 | -0.882 | 0.186 | 0.438 | 0.000295641 | Preadipocytes_3 |
| Tnip3.2    | 1.68E-07 | -0.650 | 0.018 | 0.255 | 0.000336036 | Preadipocytes_3 |
| Auts2.2    | 1.68E-07 | 0.553  | 0.770 | 0.662 | 0.000336097 | Preadipocytes_3 |

|            |          |        |       |       |             |                 |
|------------|----------|--------|-------|-------|-------------|-----------------|
| Speccl1.3  | 1.75E-07 | -1.019 | 0.283 | 0.523 | 0.000349515 | Preadipocytes_3 |
| Chsy3.1    | 1.91E-07 | 0.814  | 0.575 | 0.491 | 0.000382742 | Preadipocytes_3 |
| Efna5.3    | 2.39E-07 | 0.621  | 0.770 | 0.642 | 0.00047855  | Preadipocytes_3 |
| Stil       | 2.44E-07 | 0.741  | 0.451 | 0.313 | 0.000487917 | Preadipocytes_3 |
| Cfh.2      | 2.46E-07 | -1.816 | 0.248 | 0.555 | 0.000491021 | Preadipocytes_3 |
| Cybb.3     | 2.50E-07 | -0.977 | 0.106 | 0.353 | 0.000499368 | Preadipocytes_3 |
| Ncam1      | 2.65E-07 | 1.105  | 0.310 | 0.146 | 0.000530979 | Preadipocytes_3 |
| Prkch.2    | 2.83E-07 | -1.024 | 0.168 | 0.449 | 0.000565061 | Preadipocytes_3 |
| Cip2a      | 3.11E-07 | 0.556  | 0.319 | 0.182 | 0.000621365 | Preadipocytes_3 |
| Cenpf      | 3.14E-07 | 1.221  | 0.425 | 0.277 | 0.000627569 | Preadipocytes_3 |
| Pik3cb.3   | 3.25E-07 | -0.714 | 0.053 | 0.358 | 0.000649234 | Preadipocytes_3 |
| Nrg2.2     | 3.31E-07 | -0.586 | 0.168 | 0.425 | 0.000661701 | Preadipocytes_3 |
| Dtl        | 3.62E-07 | 1.101  | 0.434 | 0.282 | 0.000723178 | Preadipocytes_3 |
| Bank1.3    | 4.18E-07 | -0.995 | 0.115 | 0.389 | 0.000835154 | Preadipocytes_3 |
| Igfbp7.2   | 4.25E-07 | 0.801  | 0.558 | 0.368 | 0.000850167 | Preadipocytes_3 |
| Plxnc1.3   | 4.33E-07 | -0.691 | 0.097 | 0.356 | 0.000865854 | Preadipocytes_3 |
| Ptpre.2    | 4.71E-07 | -0.857 | 0.097 | 0.374 | 0.000941291 | Preadipocytes_3 |
| Dbf4       | 6.06E-07 | 0.669  | 0.372 | 0.279 | 0.001211811 | Preadipocytes_3 |
| Adam12.3   | 7.64E-07 | 0.897  | 0.637 | 0.528 | 0.001528577 | Preadipocytes_3 |
| Pla2g7.3   | 8.02E-07 | -0.721 | 0.106 | 0.351 | 0.001603124 | Preadipocytes_3 |
| Tsc22d3.3  | 8.16E-07 | -1.363 | 0.221 | 0.526 | 0.001631614 | Preadipocytes_3 |
| Kctd12.3   | 9.52E-07 | -0.620 | 0.018 | 0.278 | 0.001903673 | Preadipocytes_3 |
| Ngf.2      | 9.91E-07 | 0.574  | 0.478 | 0.308 | 0.001981688 | Preadipocytes_3 |
| Ror1.2     | 1.13E-06 | 0.709  | 0.690 | 0.609 | 0.00225467  | Preadipocytes_3 |
| Cpeb4.3    | 1.31E-06 | -1.261 | 0.327 | 0.592 | 0.002610558 | Preadipocytes_3 |
| Plekha5.2  | 1.74E-06 | -1.109 | 0.204 | 0.477 | 0.003480252 | Preadipocytes_3 |
| Tenm3      | 1.85E-06 | 1.139  | 0.319 | 0.141 | 0.003705582 | Preadipocytes_3 |
| Fry.3      | 2.16E-06 | -1.747 | 0.283 | 0.502 | 0.004320505 | Preadipocytes_3 |
| Plxna4.3   | 2.25E-06 | -0.900 | 0.248 | 0.482 | 0.004503742 | Preadipocytes_3 |
| C5ar1.3    | 2.29E-06 | -0.577 | 0.106 | 0.336 | 0.004578666 | Preadipocytes_3 |
| Selenop.3  | 2.36E-06 | -1.293 | 0.204 | 0.486 | 0.004726658 | Preadipocytes_3 |
| Aspm       | 2.58E-06 | 0.909  | 0.363 | 0.229 | 0.005151497 | Preadipocytes_3 |
| Jazf1.2    | 2.71E-06 | 0.696  | 0.602 | 0.512 | 0.005419043 | Preadipocytes_3 |
| Ttk        | 2.73E-06 | 0.754  | 0.389 | 0.224 | 0.005461084 | Preadipocytes_3 |
| Ehd4.3     | 2.87E-06 | -1.163 | 0.177 | 0.452 | 0.005740851 | Preadipocytes_3 |
| Osbpl8.2   | 3.32E-06 | -1.111 | 0.646 | 0.745 | 0.006632032 | Preadipocytes_3 |
| Cotl1.3    | 3.38E-06 | -0.611 | 0.053 | 0.324 | 0.006762362 | Preadipocytes_3 |
| Abcg3.3    | 3.40E-06 | -0.709 | 0.080 | 0.321 | 0.006809873 | Preadipocytes_3 |
| Rad51      | 3.67E-06 | 0.928  | 0.434 | 0.332 | 0.007347631 | Preadipocytes_3 |
| Lpl.3      | 3.75E-06 | -1.799 | 0.336 | 0.576 | 0.007509195 | Preadipocytes_3 |
| Ciita.3    | 3.91E-06 | -0.743 | 0.062 | 0.303 | 0.007823818 | Preadipocytes_3 |
| Grn.3      | 4.01E-06 | -0.804 | 0.080 | 0.373 | 0.008015802 | Preadipocytes_3 |
| Cd163.3    | 4.80E-06 | -1.428 | 0.204 | 0.442 | 0.009591021 | Preadipocytes_3 |
| Hmmr       | 5.49E-06 | 0.740  | 0.310 | 0.153 | 0.010983973 | Preadipocytes_3 |
| Ednrb.3    | 5.54E-06 | -0.833 | 0.159 | 0.404 | 0.011075428 | Preadipocytes_3 |
| Gcnt1.2    | 6.11E-06 | -0.536 | 0.115 | 0.353 | 0.012227865 | Preadipocytes_3 |
| Rgs7.2     | 6.93E-06 | -0.676 | 0.195 | 0.373 | 0.013869302 | Preadipocytes_3 |
| Lilr4b.3   | 7.16E-06 | -0.575 | 0.106 | 0.335 | 0.014325411 | Preadipocytes_3 |
| Slc7a8.2   | 7.40E-06 | -0.666 | 0.159 | 0.413 | 0.014805711 | Preadipocytes_3 |
| Ahcyl2.3   | 7.71E-06 | -1.350 | 0.487 | 0.633 | 0.015416266 | Preadipocytes_3 |
| Ndc80      | 7.74E-06 | 0.598  | 0.336 | 0.192 | 0.015482331 | Preadipocytes_3 |
| Slc16a10.3 | 8.19E-06 | -1.152 | 0.363 | 0.594 | 0.016373796 | Preadipocytes_3 |
| Rasa1.3    | 9.56E-06 | -1.034 | 0.549 | 0.713 | 0.019129849 | Preadipocytes_3 |
| Cst3.2     | 1.00E-05 | -0.781 | 0.044 | 0.319 | 0.019996486 | Preadipocytes_3 |
| Ptchd1.2   | 1.02E-05 | -0.528 | 0.106 | 0.333 | 0.020320247 | Preadipocytes_3 |
| Gpnmb.3    | 1.41E-05 | -1.355 | 0.177 | 0.399 | 0.028115226 | Preadipocytes_3 |
| Mpp7.3     | 1.50E-05 | -0.813 | 0.434 | 0.302 | 0.03005272  | Preadipocytes_3 |
| Pak3       | 1.52E-05 | 0.739  | 0.372 | 0.23  | 0.030402206 | Preadipocytes_3 |
| Atp6v1b2.2 | 1.57E-05 | -0.967 | 0.310 | 0.554 | 0.031412288 | Preadipocytes_3 |
| Cd226.3    | 1.67E-05 | -0.888 | 0.044 | 0.253 | 0.033456577 | Preadipocytes_3 |
| Gramd1b.2  | 1.86E-05 | -0.699 | 0.195 | 0.446 | 0.037270181 | Preadipocytes_3 |
| Fam214a.1  | 1.90E-05 | -0.739 | 0.478 | 0.722 | 0.038044467 | Preadipocytes_3 |



|            |           |        |       |       |             |                 |
|------------|-----------|--------|-------|-------|-------------|-----------------|
| Fat3.3     | 1.93E-05  | -0.860 | 0.159 | 0.368 | 0.038597645 | Preadipocytes_3 |
| Ftl1.3     | 2.30E-05  | -0.744 | 0.053 | 0.311 | 0.045979974 | Preadipocytes_3 |
| Nrep.1     | 2.53E-05  | 0.563  | 0.460 | 0.348 | 0.050650296 | Preadipocytes_3 |
| Mafb.3     | 3.31E-05  | -0.887 | 0.106 | 0.346 | 0.066103419 | Preadipocytes_3 |
| Mpp1.2     | 3.31E-05  | -0.722 | 0.115 | 0.434 | 0.066170238 | Preadipocytes_3 |
| Ccnf       | 3.48E-05  | 0.663  | 0.301 | 0.22  | 0.069619681 | Preadipocytes_3 |
| Cd44.3     | 3.58E-05  | 0.528  | 0.664 | 0.494 | 0.071506292 | Preadipocytes_3 |
| Ctsz.2     | 3.59E-05  | -0.507 | 0.035 | 0.299 | 0.071890955 | Preadipocytes_3 |
| P2rx7.2    | 4.03E-05  | -0.692 | 0.115 | 0.42  | 0.080680359 | Preadipocytes_3 |
| Il34       | 4.22E-05  | 0.543  | 0.345 | 0.223 | 0.084386179 | Preadipocytes_3 |
| Ms4a6b.3   | 4.67E-05  | -0.630 | 0.168 | 0.385 | 0.09336696  | Preadipocytes_3 |
| Entpd1.3   | 4.78E-05  | -0.975 | 0.230 | 0.494 | 0.095626083 | Preadipocytes_3 |
| Card11.2   | 4.98E-05  | -0.596 | 0.142 | 0.34  | 0.099547901 | Preadipocytes_3 |
| Adamts19   | 5.65E-05  | 0.759  | 0.283 | 0.126 | 0.112917988 | Preadipocytes_3 |
| Depdc1b    | 5.73E-05  | 0.512  | 0.257 | 0.153 | 0.114675586 | Preadipocytes_3 |
| Ank.1      | 5.89E-05  | -0.623 | 0.230 | 0.506 | 0.117777854 | Preadipocytes_3 |
| Sema5a.2   | 7.02E-05  | 0.704  | 0.460 | 0.365 | 0.140420579 | Preadipocytes_3 |
| Cadps2.1   | 7.30E-05  | 0.507  | 0.442 | 0.337 | 0.146059757 | Preadipocytes_3 |
| Plpp1.1    | 8.15E-05  | 0.588  | 0.531 | 0.499 | 0.163081488 | Preadipocytes_3 |
| Adam23.1   | 8.33E-05  | 0.507  | 0.566 | 0.507 | 0.166602519 | Preadipocytes_3 |
| Mycbp2.2   | 8.39E-05  | -1.073 | 0.788 | 0.853 | 0.167882565 | Preadipocytes_3 |
| Ddx60.3    | 9.38E-05  | -0.612 | 0.398 | 0.661 | 0.187651188 | Preadipocytes_3 |
| Nabp1.3    | 0.0001004 | -0.674 | 0.115 | 0.351 | 0.200786976 | Preadipocytes_3 |
| Hacd2.3    | 0.0001201 | -0.798 | 0.354 | 0.289 | 0.240255054 | Preadipocytes_3 |
| Tox.2      | 0.0001233 | -0.528 | 0.142 | 0.331 | 0.246503121 | Preadipocytes_3 |
| Itgb2.3    | 0.0001315 | -0.524 | 0.035 | 0.25  | 0.263039322 | Preadipocytes_3 |
| Arid5b.3   | 0.0001327 | -0.695 | 0.513 | 0.699 | 0.265307568 | Preadipocytes_3 |
| Pde3b.3    | 0.000138  | -1.706 | 0.425 | 0.577 | 0.276045943 | Preadipocytes_3 |
| Cbfa2t3.2  | 0.0001561 | -0.561 | 0.080 | 0.299 | 0.312248496 | Preadipocytes_3 |
| Sipa1l1.3  | 0.0001743 | -0.836 | 0.363 | 0.574 | 0.348544246 | Preadipocytes_3 |
| Ctsl.3     | 0.0001879 | -0.653 | 0.062 | 0.319 | 0.375700439 | Preadipocytes_3 |
| Pdnp.1     | 0.0001913 | 0.515  | 0.425 | 0.311 | 0.382686245 | Preadipocytes_3 |
| Trf.2      | 0.0002173 | -0.595 | 0.018 | 0.275 | 0.434662735 | Preadipocytes_3 |
| Sort1.3    | 0.0002175 | -0.650 | 0.150 | 0.365 | 0.434938533 | Preadipocytes_3 |
| Dlgap5     | 0.0002181 | 0.578  | 0.310 | 0.169 | 0.436147839 | Preadipocytes_3 |
| Kif22      | 0.0002313 | 0.629  | 0.274 | 0.175 | 0.462687735 | Preadipocytes_3 |
| Pfkfb3.3   | 0.0002353 | -1.054 | 0.204 | 0.431 | 0.47057305  | Preadipocytes_3 |
| Ntrk2.1    | 0.0002602 | -0.614 | 0.248 | 0.423 | 0.520349341 | Preadipocytes_3 |
| Rap1gap2.2 | 0.000279  | -0.641 | 0.088 | 0.319 | 0.557913088 | Preadipocytes_3 |
| Fhit.1     | 0.0002878 | -0.579 | 0.619 | 0.821 | 0.575574947 | Preadipocytes_3 |
| Tank.3     | 0.0002965 | -0.650 | 0.469 | 0.645 | 0.592953971 | Preadipocytes_3 |
| Fgf13.3    | 0.000377  | -0.810 | 0.248 | 0.427 | 0.753945181 | Preadipocytes_3 |
| Tenm4.3    | 0.0003884 | -2.887 | 0.204 | 0.416 | 0.776787876 | Preadipocytes_3 |
| Ccdc18     | 0.0003901 | 0.777  | 0.310 | 0.225 | 0.780228889 | Preadipocytes_3 |
| Rnf149.2   | 0.0004217 | -0.822 | 0.150 | 0.425 | 0.843331837 | Preadipocytes_3 |
| Pbk        | 0.0004634 | 0.614  | 0.274 | 0.129 | 0.926824549 | Preadipocytes_3 |
| Parpbbp    | 0.0005019 | 0.573  | 0.257 | 0.152 | 1           | Preadipocytes_3 |
| Cd180.3    | 0.0005243 | -0.745 | 0.115 | 0.324 | 1           | Preadipocytes_3 |
| Fmo2.3     | 0.0005299 | -0.800 | 0.168 | 0.308 | 1           | Preadipocytes_3 |
| Ctsd.2     | 0.0005586 | -1.024 | 0.080 | 0.307 | 1           | Preadipocytes_3 |
| Ppfia2.1   | 0.0005597 | 0.519  | 0.354 | 0.25  | 1           | Preadipocytes_3 |
| Atp6v1a.2  | 0.0006357 | -0.717 | 0.257 | 0.499 | 1           | Preadipocytes_3 |
| Mctp2.2    | 0.0009675 | -0.604 | 0.186 | 0.379 | 1           | Preadipocytes_3 |
| Hexa.3     | 0.0009998 | -0.697 | 0.133 | 0.403 | 1           | Preadipocytes_3 |
| Pou2f2.1   | 0.0010068 | -0.511 | 0.097 | 0.308 | 1           | Preadipocytes_3 |
| Pag1.3     | 0.0010388 | -0.575 | 0.204 | 0.442 | 1           | Preadipocytes_3 |
| Txlng.1    | 0.0012806 | -0.691 | 0.451 | 0.641 | 1           | Preadipocytes_3 |
| Bcar3.3    | 0.0016644 | -1.698 | 0.239 | 0.425 | 1           | Preadipocytes_3 |
| Fgf10.2    | 0.0017668 | -0.676 | 0.204 | 0.366 | 1           | Preadipocytes_3 |
| Ubash3b.3  | 0.0018617 | -1.000 | 0.327 | 0.469 | 1           | Preadipocytes_3 |
| Cd86.1     | 0.0019097 | -0.532 | 0.168 | 0.338 | 1           | Preadipocytes_3 |
| Trim25.3   | 0.0019343 | -0.696 | 0.283 | 0.486 | 1           | Preadipocytes_3 |

|            |           |        |       |       |   |                 |
|------------|-----------|--------|-------|-------|---|-----------------|
| Tmem106a.3 | 0.002099  | -0.775 | 0.142 | 0.405 | 1 | Preadipocytes_3 |
| Soat1.3    | 0.002182  | -0.676 | 0.053 | 0.341 | 1 | Preadipocytes_3 |
| Fam126b.3  | 0.0023063 | -0.647 | 0.389 | 0.342 | 1 | Preadipocytes_3 |
| Spag5      | 0.0026679 | 0.586  | 0.283 | 0.2   | 1 | Preadipocytes_3 |
| Esco2      | 0.0027772 | 0.518  | 0.257 | 0.141 | 1 | Preadipocytes_3 |
| Eepd1.3    | 0.0028733 | -1.006 | 0.177 | 0.373 | 1 | Preadipocytes_3 |
| Clec12a.2  | 0.0035393 | -0.528 | 0.097 | 0.279 | 1 | Preadipocytes_3 |
| Fnip2.3    | 0.0036568 | -0.649 | 0.584 | 0.748 | 1 | Preadipocytes_3 |
| Inpp4b.2   | 0.0044225 | -0.638 | 0.301 | 0.51  | 1 | Preadipocytes_3 |
| Ghr.3      | 0.0052352 | -1.915 | 0.894 | 0.649 | 1 | Preadipocytes_3 |
| Ctsa.2     | 0.00693   | -0.508 | 0.009 | 0.261 | 1 | Preadipocytes_3 |
| Lyve1.3    | 0.0087254 | -0.607 | 0.133 | 0.266 | 1 | Preadipocytes_3 |
| Evl.3      | 0.0099765 | -0.835 | 0.239 | 0.384 | 1 | Preadipocytes_3 |
| F13a1.3    | 0         | 3.649  | 0.935 | 0.437 | 0 | Macrophages_1   |
| ApoE.4     | 0         | 2.701  | 0.930 | 0.365 | 0 | Macrophages_1   |
| Cd163.4    | 0         | 2.577  | 0.753 | 0.335 | 0 | Macrophages_1   |
| Cfh.3      | 0         | 2.542  | 0.908 | 0.433 | 0 | Macrophages_1   |
| Ctsc.3     | 0         | 2.495  | 0.947 | 0.332 | 0 | Macrophages_1   |
| Retn1a.4   | 0         | 2.327  | 0.746 | 0.135 | 0 | Macrophages_1   |
| Hdac9.3    | 0         | 1.996  | 0.935 | 0.412 | 0 | Macrophages_1   |
| Selenop.4  | 0         | 1.966  | 0.890 | 0.348 | 0 | Macrophages_1   |
| Plekha7.3  | 0         | 1.964  | 0.850 | 0.348 | 0 | Macrophages_1   |
| Clec10a.4  | 0         | 1.928  | 0.900 | 0.295 | 0 | Macrophages_1   |
| Ednrb.4    | 0         | 1.899  | 0.777 | 0.277 | 0 | Macrophages_1   |
| C1qa.4     | 0         | 1.893  | 0.689 | 0.163 | 0 | Macrophages_1   |
| Fyb.4      | 0         | 1.797  | 0.955 | 0.384 | 0 | Macrophages_1   |
| Ccl6.4     | 0         | 1.781  | 0.795 | 0.181 | 0 | Macrophages_1   |
| Epsti1.4   | 0         | 1.777  | 0.910 | 0.339 | 0 | Macrophages_1   |
| Stab1.4    | 0         | 1.776  | 0.904 | 0.334 | 0 | Macrophages_1   |
| Adgre1.4   | 0         | 1.772  | 0.956 | 0.344 | 0 | Macrophages_1   |
| Pltp.3     | 0         | 1.771  | 0.845 | 0.307 | 0 | Macrophages_1   |
| P3h2.4     | 0         | 1.770  | 0.787 | 0.317 | 0 | Macrophages_1   |
| Bank1.4    | 0         | 1.736  | 0.756 | 0.263 | 0 | Macrophages_1   |
| Itga4.4    | 0         | 1.716  | 0.839 | 0.274 | 0 | Macrophages_1   |
| Mertk.3    | 0         | 1.715  | 0.938 | 0.452 | 0 | Macrophages_1   |
| Mtss1.3    | 0         | 1.680  | 0.963 | 0.493 | 0 | Macrophages_1   |
| Ccr2.4     | 0         | 1.676  | 0.658 | 0.129 | 0 | Macrophages_1   |
| Aoah.4     | 0         | 1.646  | 0.880 | 0.33  | 0 | Macrophages_1   |
| Lyz2.4     | 0         | 1.646  | 0.748 | 0.194 | 0 | Macrophages_1   |
| C1qb.4     | 0         | 1.611  | 0.706 | 0.164 | 0 | Macrophages_1   |
| Ms4a6c.4   | 0         | 1.581  | 0.839 | 0.242 | 0 | Macrophages_1   |
| Adgre4.4   | 0         | 1.564  | 0.660 | 0.168 | 0 | Macrophages_1   |
| Lyve1.4    | 0         | 1.497  | 0.767 | 0.096 | 0 | Macrophages_1   |
| Ddx60.4    | 0         | 1.423  | 0.886 | 0.583 | 0 | Macrophages_1   |
| Wdfy4.4    | 0         | 1.418  | 0.837 | 0.274 | 0 | Macrophages_1   |
| Shtn1.4    | 0         | 1.384  | 0.915 | 0.325 | 0 | Macrophages_1   |
| St8sia4.4  | 0         | 1.365  | 0.867 | 0.253 | 0 | Macrophages_1   |
| Prkcb.4    | 0         | 1.326  | 0.857 | 0.335 | 0 | Macrophages_1   |
| Ehd4.4     | 0         | 1.322  | 0.858 | 0.313 | 0 | Macrophages_1   |
| Cybb.4     | 0         | 1.305  | 0.790 | 0.204 | 0 | Macrophages_1   |
| Nrg2.3     | 0         | 1.292  | 0.782 | 0.301 | 0 | Macrophages_1   |
| Mctp2.3    | 0         | 1.280  | 0.739 | 0.256 | 0 | Macrophages_1   |
| Adap2.3    | 0         | 1.278  | 0.922 | 0.452 | 0 | Macrophages_1   |
| Ms4a6b.4   | 0         | 1.270  | 0.789 | 0.247 | 0 | Macrophages_1   |
| Kcnk13.4   | 0         | 1.250  | 0.799 | 0.363 | 0 | Macrophages_1   |
| Cfp.4      | 0         | 1.224  | 0.668 | 0.133 | 0 | Macrophages_1   |
| Csf2ra.4   | 0         | 1.221  | 0.833 | 0.268 | 0 | Macrophages_1   |
| Mafb.4     | 0         | 1.193  | 0.698 | 0.225 | 0 | Macrophages_1   |
| Ms4a4a.1   | 0         | 1.159  | 0.801 | 0.251 | 0 | Macrophages_1   |
| Kctd12.4   | 0         | 1.156  | 0.697 | 0.134 | 0 | Macrophages_1   |
| Spi1.4     | 0         | 1.156  | 0.815 | 0.246 | 0 | Macrophages_1   |
| Myo1f.4    | 0         | 1.141  | 0.934 | 0.375 | 0 | Macrophages_1   |

|             |   |        |       |       |   |               |
|-------------|---|--------|-------|-------|---|---------------|
| Entpd1.4    | 0 | 1.116  | 0.849 | 0.371 | 0 | Macrophages_1 |
| Blnc.4      | 0 | 1.107  | 0.895 | 0.34  | 0 | Macrophages_1 |
| Lgmn.4      | 0 | 1.104  | 0.851 | 0.306 | 0 | Macrophages_1 |
| Abcg3.4     | 0 | 1.100  | 0.684 | 0.196 | 0 | Macrophages_1 |
| Ly6e.1      | 0 | 1.099  | 0.657 | 0.156 | 0 | Macrophages_1 |
| Itm2b.3     | 0 | 1.094  | 0.806 | 0.477 | 0 | Macrophages_1 |
| Gas6.4      | 0 | 1.070  | 0.822 | 0.329 | 0 | Macrophages_1 |
| Pla2g7.4    | 0 | 1.055  | 0.788 | 0.202 | 0 | Macrophages_1 |
| Tec.4       | 0 | 1.052  | 0.811 | 0.314 | 0 | Macrophages_1 |
| Nckap1l.4   | 0 | 1.043  | 0.823 | 0.299 | 0 | Macrophages_1 |
| Nrp2.4      | 0 | 1.031  | 0.839 | 0.299 | 0 | Macrophages_1 |
| Ncf1.3      | 0 | 1.028  | 0.669 | 0.167 | 0 | Macrophages_1 |
| Ms4a7.4     | 0 | 1.020  | 0.850 | 0.262 | 0 | Macrophages_1 |
| Pik3ap1.3   | 0 | 1.018  | 0.871 | 0.358 | 0 | Macrophages_1 |
| Cd300a.4    | 0 | 1.011  | 0.736 | 0.24  | 0 | Macrophages_1 |
| Pou2f2.2    | 0 | 0.998  | 0.644 | 0.193 | 0 | Macrophages_1 |
| Apobec1.3   | 0 | 0.994  | 0.924 | 0.41  | 0 | Macrophages_1 |
| Msr1.4      | 0 | 0.978  | 0.842 | 0.244 | 0 | Macrophages_1 |
| Cd86.2      | 0 | 0.957  | 0.665 | 0.227 | 0 | Macrophages_1 |
| Cd209f      | 0 | 0.956  | 0.616 | 0.082 | 0 | Macrophages_1 |
| Cd200r1.4   | 0 | 0.946  | 0.858 | 0.294 | 0 | Macrophages_1 |
| Abhd12.4    | 0 | 0.933  | 0.932 | 0.44  | 0 | Macrophages_1 |
| Plxna4.4    | 0 | 0.916  | 0.827 | 0.363 | 0 | Macrophages_1 |
| Lcp1.4      | 0 | 0.899  | 0.885 | 0.324 | 0 | Macrophages_1 |
| Ccr5.4      | 0 | 0.889  | 0.760 | 0.209 | 0 | Macrophages_1 |
| Pitpnc1.4   | 0 | 0.870  | 0.965 | 0.641 | 0 | Macrophages_1 |
| Plxnc1.4    | 0 | 0.867  | 0.766 | 0.215 | 0 | Macrophages_1 |
| Slc6a6.3    | 0 | 0.857  | 0.883 | 0.445 | 0 | Macrophages_1 |
| Mpp1.3      | 0 | 0.851  | 0.747 | 0.326 | 0 | Macrophages_1 |
| Grk3.3      | 0 | 0.846  | 0.699 | 0.244 | 0 | Macrophages_1 |
| Ubash3b.4   | 0 | 0.826  | 0.805 | 0.354 | 0 | Macrophages_1 |
| Cd84.4      | 0 | 0.787  | 0.900 | 0.324 | 0 | Macrophages_1 |
| Ptpn22.4    | 0 | 0.781  | 0.724 | 0.248 | 0 | Macrophages_1 |
| Cd209b      | 0 | 0.781  | 0.637 | 0.177 | 0 | Macrophages_1 |
| Cd38        | 0 | 0.779  | 0.731 | 0.251 | 0 | Macrophages_1 |
| C5ar1.4     | 0 | 0.777  | 0.757 | 0.192 | 0 | Macrophages_1 |
| Gcnt1.3     | 0 | 0.767  | 0.712 | 0.23  | 0 | Macrophages_1 |
| Hck.1       | 0 | 0.766  | 0.693 | 0.196 | 0 | Macrophages_1 |
| Insyn2b.4   | 0 | 0.760  | 0.833 | 0.289 | 0 | Macrophages_1 |
| Cacna1d.4   | 0 | 0.749  | 0.870 | 0.344 | 0 | Macrophages_1 |
| Tmem106a.4  | 0 | 0.747  | 0.748 | 0.287 | 0 | Macrophages_1 |
| Ripor2.2    | 0 | 0.744  | 0.734 | 0.288 | 0 | Macrophages_1 |
| Vsig4       | 0 | 0.732  | 0.671 | 0.205 | 0 | Macrophages_1 |
| Rnf149.3    | 0 | 0.724  | 0.754 | 0.311 | 0 | Macrophages_1 |
| Rnf180.1    | 0 | 0.722  | 0.805 | 0.471 | 0 | Macrophages_1 |
| Tnfrsf11a.4 | 0 | 0.721  | 0.795 | 0.339 | 0 | Macrophages_1 |
| Prune2.2    | 0 | 0.663  | 0.817 | 0.328 | 0 | Macrophages_1 |
| Pik3r5.4    | 0 | 0.661  | 0.747 | 0.284 | 0 | Macrophages_1 |
| Trim25.4    | 0 | 0.660  | 0.774 | 0.388 | 0 | Macrophages_1 |
| Ak8         | 0 | 0.638  | 0.613 | 0.152 | 0 | Macrophages_1 |
| Rbm47.4     | 0 | 0.636  | 0.939 | 0.471 | 0 | Macrophages_1 |
| Ipcef1.1    | 0 | 0.636  | 0.620 | 0.128 | 0 | Macrophages_1 |
| Ifi213      | 0 | 0.614  | 0.678 | 0.153 | 0 | Macrophages_1 |
| C6.1        | 0 | 0.589  | 0.744 | 0.181 | 0 | Macrophages_1 |
| Gm5150.2    | 0 | 0.535  | 0.666 | 0.188 | 0 | Macrophages_1 |
| Arhgap26.1  | 0 | -0.521 | 0.072 | 0.43  | 0 | Macrophages_1 |
| Xkr6.1      | 0 | -0.540 | 0.089 | 0.449 | 0 | Macrophages_1 |
| Clmn.1      | 0 | -0.579 | 0.025 | 0.402 | 0 | Macrophages_1 |
| Ephb2.1     | 0 | -0.586 | 0.027 | 0.435 | 0 | Macrophages_1 |
| Jph1.1      | 0 | -0.594 | 0.008 | 0.429 | 0 | Macrophages_1 |
| Anpep.1     | 0 | -0.649 | 0.282 | 0.466 | 0 | Macrophages_1 |
| Dusp10.2    | 0 | -0.739 | 0.137 | 0.404 | 0 | Macrophages_1 |

|              |   |        |       |       |   |               |
|--------------|---|--------|-------|-------|---|---------------|
| Nkain2.1     | 0 | -0.773 | 0.001 | 0.419 | 0 | Macrophages_1 |
| Mme.3        | 0 | -0.892 | 0.071 | 0.479 | 0 | Macrophages_1 |
| Fgf7.2       | 0 | -0.918 | 0.108 | 0.463 | 0 | Macrophages_1 |
| Fmo1.1       | 0 | -0.930 | 0.066 | 0.482 | 0 | Macrophages_1 |
| Trhde.2      | 0 | -0.932 | 0.007 | 0.279 | 0 | Macrophages_1 |
| Sned1.1      | 0 | -0.952 | 0.267 | 0.488 | 0 | Macrophages_1 |
| Apex2.1      | 0 | -0.972 | 0.394 | 0.626 | 0 | Macrophages_1 |
| Foxp2.3      | 0 | -0.987 | 0.003 | 0.386 | 0 | Macrophages_1 |
| Stox2.2      | 0 | -1.034 | 0.171 | 0.55  | 0 | Macrophages_1 |
| Trabd2b.2    | 0 | -1.048 | 0.074 | 0.443 | 0 | Macrophages_1 |
| Txlng.2      | 0 | -1.068 | 0.454 | 0.701 | 0 | Macrophages_1 |
| Pde10a.2     | 0 | -1.087 | 0.187 | 0.47  | 0 | Macrophages_1 |
| Asph.1       | 0 | -1.093 | 0.573 | 0.825 | 0 | Macrophages_1 |
| Syne1.1      | 0 | -1.097 | 0.521 | 0.763 | 0 | Macrophages_1 |
| Kcnc2.2      | 0 | -1.099 | 0.012 | 0.395 | 0 | Macrophages_1 |
| Jazf1.3      | 0 | -1.106 | 0.310 | 0.581 | 0 | Macrophages_1 |
| Prickle2.1   | 0 | -1.111 | 0.241 | 0.537 | 0 | Macrophages_1 |
| Rgs7.3       | 0 | -1.122 | 0.028 | 0.487 | 0 | Macrophages_1 |
| lfrd1.1      | 0 | -1.136 | 0.224 | 0.642 | 0 | Macrophages_1 |
| Boc.1        | 0 | -1.158 | 0.227 | 0.56  | 0 | Macrophages_1 |
| Fig.2        | 0 | -1.177 | 0.098 | 0.565 | 0 | Macrophages_1 |
| Ntrk2.2      | 0 | -1.204 | 0.092 | 0.532 | 0 | Macrophages_1 |
| Ptprk.2      | 0 | -1.210 | 0.020 | 0.557 | 0 | Macrophages_1 |
| Tcaf1.1      | 0 | -1.245 | 0.046 | 0.575 | 0 | Macrophages_1 |
| Fam13a.2     | 0 | -1.267 | 0.100 | 0.463 | 0 | Macrophages_1 |
| Ctdspl.1     | 0 | -1.268 | 0.215 | 0.629 | 0 | Macrophages_1 |
| Gask1b.3     | 0 | -1.289 | 0.303 | 0.577 | 0 | Macrophages_1 |
| Abca8b.3     | 0 | -1.325 | 0.211 | 0.534 | 0 | Macrophages_1 |
| Anxa1.1      | 0 | -1.346 | 0.325 | 0.674 | 0 | Macrophages_1 |
| Ldb2.3       | 0 | -1.363 | 0.263 | 0.538 | 0 | Macrophages_1 |
| Dlg2.2       | 0 | -1.376 | 0.151 | 0.565 | 0 | Macrophages_1 |
| Tln2.2       | 0 | -1.381 | 0.087 | 0.588 | 0 | Macrophages_1 |
| Aebp1.3      | 0 | -1.386 | 0.004 | 0.407 | 0 | Macrophages_1 |
| Csgalnact1.3 | 0 | -1.406 | 0.421 | 0.604 | 0 | Macrophages_1 |
| Aox1.1       | 0 | -1.410 | 0.074 | 0.603 | 0 | Macrophages_1 |
| Pmepa1.1     | 0 | -1.419 | 0.018 | 0.556 | 0 | Macrophages_1 |
| Slc2a13.2    | 0 | -1.425 | 0.100 | 0.605 | 0 | Macrophages_1 |
| Lgr4.1       | 0 | -1.433 | 0.022 | 0.582 | 0 | Macrophages_1 |
| Aff2.2       | 0 | -1.434 | 0.137 | 0.534 | 0 | Macrophages_1 |
| Col6a2.2     | 0 | -1.451 | 0.056 | 0.524 | 0 | Macrophages_1 |
| Mical3.1     | 0 | -1.451 | 0.067 | 0.605 | 0 | Macrophages_1 |
| Zfp423.1     | 0 | -1.464 | 0.107 | 0.628 | 0 | Macrophages_1 |
| Ugdh.2       | 0 | -1.479 | 0.194 | 0.552 | 0 | Macrophages_1 |
| Irs1.2       | 0 | -1.482 | 0.109 | 0.581 | 0 | Macrophages_1 |
| Xkr4.2       | 0 | -1.511 | 0.188 | 0.568 | 0 | Macrophages_1 |
| Pde1a.3      | 0 | -1.531 | 0.091 | 0.627 | 0 | Macrophages_1 |
| Aspn.3       | 0 | -1.532 | 0.023 | 0.535 | 0 | Macrophages_1 |
| Msr3.2       | 0 | -1.555 | 0.067 | 0.645 | 0 | Macrophages_1 |
| Prickle1.1   | 0 | -1.597 | 0.374 | 0.608 | 0 | Macrophages_1 |
| Wwtr1.2      | 0 | -1.654 | 0.134 | 0.665 | 0 | Macrophages_1 |
| Macro2.1     | 0 | -1.698 | 0.176 | 0.635 | 0 | Macrophages_1 |
| Foxo1.1      | 0 | -1.702 | 0.393 | 0.754 | 0 | Macrophages_1 |
| Pcolce2.2    | 0 | -1.708 | 0.203 | 0.571 | 0 | Macrophages_1 |
| Col4a2.3     | 0 | -1.709 | 0.199 | 0.551 | 0 | Macrophages_1 |
| Postn.4      | 0 | -1.715 | 0.143 | 0.518 | 0 | Macrophages_1 |
| Cachd1.2     | 0 | -1.721 | 0.145 | 0.706 | 0 | Macrophages_1 |
| Bckdhb.3     | 0 | -1.746 | 0.286 | 0.628 | 0 | Macrophages_1 |
| Ptprm.2      | 0 | -1.768 | 0.687 | 0.815 | 0 | Macrophages_1 |
| Dmd.3        | 0 | -1.769 | 0.168 | 0.672 | 0 | Macrophages_1 |
| Ror1.3       | 0 | -1.790 | 0.494 | 0.649 | 0 | Macrophages_1 |
| Magi1.1      | 0 | -1.791 | 0.259 | 0.647 | 0 | Macrophages_1 |
| Col6a3.2     | 0 | -1.796 | 0.261 | 0.631 | 0 | Macrophages_1 |

|            |           |        |       |       |           |               |
|------------|-----------|--------|-------|-------|-----------|---------------|
| Pcdh19.4   | 0         | -1.801 | 0.290 | 0.622 | 0         | Macrophages_1 |
| Acyp2.1    | 0         | -1.808 | 0.346 | 0.776 | 0         | Macrophages_1 |
| Col5a3.3   | 0         | -1.825 | 0.280 | 0.656 | 0         | Macrophages_1 |
| Angpt1.2   | 0         | -1.841 | 0.199 | 0.633 | 0         | Macrophages_1 |
| Itih5.3    | 0         | -1.858 | 0.093 | 0.693 | 0         | Macrophages_1 |
| Arhgap29.2 | 0         | -1.887 | 0.150 | 0.689 | 0         | Macrophages_1 |
| Vcan.3     | 0         | -1.888 | 0.431 | 0.599 | 0         | Macrophages_1 |
| Bmper.1    | 0         | -1.898 | 0.435 | 0.656 | 0         | Macrophages_1 |
| Gabra3.3   | 0         | -1.901 | 0.352 | 0.6   | 0         | Macrophages_1 |
| Errfi1.3   | 0         | -1.912 | 0.391 | 0.579 | 0         | Macrophages_1 |
| Smpd3.2    | 0         | -1.913 | 0.399 | 0.599 | 0         | Macrophages_1 |
| Dclk1.4    | 0         | -1.939 | 0.425 | 0.663 | 0         | Macrophages_1 |
| Epn2.1     | 0         | -1.946 | 0.140 | 0.687 | 0         | Macrophages_1 |
| Pdzd2.2    | 0         | -1.946 | 0.234 | 0.631 | 0         | Macrophages_1 |
| Eda.2      | 0         | -1.990 | 0.593 | 0.733 | 0         | Macrophages_1 |
| Large1.1   | 0         | -2.033 | 0.636 | 0.922 | 0         | Macrophages_1 |
| Slc24a3.2  | 0         | -2.105 | 0.369 | 0.671 | 0         | Macrophages_1 |
| Col4a1.3   | 0         | -2.134 | 0.244 | 0.618 | 0         | Macrophages_1 |
| Prr16.2    | 0         | -2.170 | 0.010 | 0.523 | 0         | Macrophages_1 |
| Clec3b.3   | 0         | -2.198 | 0.246 | 0.589 | 0         | Macrophages_1 |
| Nrip1.3    | 0         | -2.200 | 0.414 | 0.802 | 0         | Macrophages_1 |
| Vgll3.1    | 0         | -2.209 | 0.251 | 0.714 | 0         | Macrophages_1 |
| B3galt1.1  | 0         | -2.240 | 0.324 | 0.682 | 0         | Macrophages_1 |
| Tead1.3    | 0         | -2.253 | 0.373 | 0.769 | 0         | Macrophages_1 |
| Pcsk5.2    | 0         | -2.259 | 0.417 | 0.697 | 0         | Macrophages_1 |
| Adam12.4   | 0         | -2.275 | 0.225 | 0.632 | 0         | Macrophages_1 |
| Mfap5.3    | 0         | -2.279 | 0.233 | 0.622 | 0         | Macrophages_1 |
| Ccdc80.2   | 0         | -2.316 | 0.058 | 0.674 | 0         | Macrophages_1 |
| Acss3.1    | 0         | -2.338 | 0.171 | 0.749 | 0         | Macrophages_1 |
| Abca8a.3   | 0         | -2.401 | 0.301 | 0.687 | 0         | Macrophages_1 |
| Slc1a5.3   | 0         | -2.412 | 0.166 | 0.594 | 0         | Macrophages_1 |
| Sparc.3    | 0         | -2.414 | 0.241 | 0.676 | 0         | Macrophages_1 |
| Ptprd.2    | 0         | -2.455 | 0.174 | 0.732 | 0         | Macrophages_1 |
| Gfpt2.3    | 0         | -2.524 | 0.315 | 0.65  | 0         | Macrophages_1 |
| Col1a1.3   | 0         | -2.544 | 0.229 | 0.59  | 0         | Macrophages_1 |
| Auts2.3    | 0         | -2.546 | 0.392 | 0.753 | 0         | Macrophages_1 |
| Ptprg.3    | 0         | -2.600 | 0.295 | 0.812 | 0         | Macrophages_1 |
| Svep1.2    | 0         | -2.652 | 0.284 | 0.744 | 0         | Macrophages_1 |
| Prkd1.3    | 0         | -2.731 | 0.120 | 0.737 | 0         | Macrophages_1 |
| C7.2       | 0         | -2.744 | 0.085 | 0.536 | 0         | Macrophages_1 |
| Efna5.4    | 0         | -2.809 | 0.372 | 0.734 | 0         | Macrophages_1 |
| Prkg1.3    | 0         | -2.822 | 0.636 | 0.749 | 0         | Macrophages_1 |
| Lama4.2    | 0         | -2.834 | 0.162 | 0.813 | 0         | Macrophages_1 |
| Dst.2      | 0         | -2.864 | 0.163 | 0.824 | 0         | Macrophages_1 |
| Itgbl1.2   | 0         | -2.918 | 0.519 | 0.703 | 0         | Macrophages_1 |
| Thsd7a.3   | 0         | -2.919 | 0.520 | 0.75  | 0         | Macrophages_1 |
| Col14a1.3  | 0         | -2.923 | 0.519 | 0.72  | 0         | Macrophages_1 |
| Aldh1a1.3  | 0         | -2.951 | 0.445 | 0.826 | 0         | Macrophages_1 |
| Adamts12.2 | 0         | -2.952 | 0.518 | 0.809 | 0         | Macrophages_1 |
| Adamts5.2  | 0         | -3.131 | 0.266 | 0.824 | 0         | Macrophages_1 |
| Adamts1.4  | 0         | -3.153 | 0.638 | 0.772 | 0         | Macrophages_1 |
| Nox4.3     | 0         | -3.345 | 0.503 | 0.764 | 0         | Macrophages_1 |
| Dcn.3      | 0         | -3.353 | 0.313 | 0.723 | 0         | Macrophages_1 |
| Col1a2.4   | 0         | -3.358 | 0.308 | 0.737 | 0         | Macrophages_1 |
| Mid1.3     | 0         | -3.375 | 0.291 | 0.838 | 0         | Macrophages_1 |
| Sgcd.3     | 0         | -3.408 | 0.168 | 0.758 | 0         | Macrophages_1 |
| Gsn.2      | 0         | -3.928 | 0.504 | 0.77  | 0         | Macrophages_1 |
| Col3a1.4   | 0         | -4.124 | 0.548 | 0.799 | 0         | Macrophages_1 |
| Ghr.4      | 0         | -5.254 | 0.137 | 0.824 | 0         | Macrophages_1 |
| Pcolce.2   | 2.43E-305 | -0.848 | 0.119 | 0.369 | 4.86E-302 | Macrophages_1 |
| Mgl2.3     | 5.01E-304 | 1.378  | 0.612 | 0.107 | 1.00E-300 | Macrophages_1 |
| Ctsb.4     | 7.88E-304 | 0.521  | 0.793 | 0.347 | 1.58E-300 | Macrophages_1 |

|              |           |        |       |       |           |               |
|--------------|-----------|--------|-------|-------|-----------|---------------|
| Pcdh9.2      | 8.37E-304 | -2.710 | 0.472 | 0.637 | 1.67E-300 | Macrophages_1 |
| Cd226.4      | 1.30E-303 | 1.264  | 0.616 | 0.128 | 2.60E-300 | Macrophages_1 |
| Galnt17.4    | 1.88E-303 | -1.661 | 0.423 | 0.615 | 3.75E-300 | Macrophages_1 |
| Cacna1c.2    | 1.60E-302 | -0.848 | 0.333 | 0.507 | 3.20E-299 | Macrophages_1 |
| Aqp9         | 5.43E-300 | 0.643  | 0.591 | 0.111 | 1.09E-296 | Macrophages_1 |
| Prkar2b.3    | 4.07E-299 | -2.352 | 0.255 | 0.288 | 8.14E-296 | Macrophages_1 |
| Pi16.2       | 5.49E-297 | -2.794 | 0.299 | 0.591 | 1.10E-293 | Macrophages_1 |
| Pdzrn3.3     | 1.08E-296 | -1.962 | 0.154 | 0.543 | 2.16E-293 | Macrophages_1 |
| Dnm3.2       | 3.16E-293 | -1.281 | 0.560 | 0.66  | 6.32E-290 | Macrophages_1 |
| Mgll.2       | 5.51E-293 | -1.860 | 0.124 | 0.557 | 1.10E-289 | Macrophages_1 |
| Atp6v0d2.4   | 6.67E-289 | -0.645 | 0.775 | 0.307 | 1.33E-285 | Macrophages_1 |
| Ctss.4       | 2.58E-286 | 0.715  | 0.707 | 0.23  | 5.16E-283 | Macrophages_1 |
| Chrdl1.1     | 1.44E-285 | -1.012 | 0.169 | 0.481 | 2.88E-282 | Macrophages_1 |
| Sema3e.3     | 3.56E-285 | -2.340 | 0.359 | 0.595 | 7.11E-282 | Macrophages_1 |
| Rnf24.1      | 6.83E-284 | -0.749 | 0.120 | 0.385 | 1.37E-280 | Macrophages_1 |
| Tns3.3       | 1.03E-283 | 0.729  | 0.794 | 0.39  | 2.05E-280 | Macrophages_1 |
| Ahcyl2.4     | 1.62E-282 | 0.917  | 0.898 | 0.543 | 3.25E-279 | Macrophages_1 |
| Slc7a8.3     | 5.58E-282 | 0.535  | 0.727 | 0.305 | 1.12E-278 | Macrophages_1 |
| Dok2.3       | 1.43E-280 | 0.811  | 0.631 | 0.162 | 2.87E-277 | Macrophages_1 |
| Skap1.2      | 1.46E-280 | -0.597 | 0.505 | 0.166 | 2.92E-277 | Macrophages_1 |
| Fgr.2        | 9.17E-279 | 0.921  | 0.572 | 0.117 | 1.83E-275 | Macrophages_1 |
| Fbln2.4      | 3.99E-278 | -1.768 | 0.225 | 0.531 | 7.98E-275 | Macrophages_1 |
| Ccdc3.1      | 1.86E-276 | -0.877 | 0.028 | 0.441 | 3.72E-273 | Macrophages_1 |
| Col12a1.3    | 3.63E-272 | -1.403 | 0.131 | 0.468 | 7.26E-269 | Macrophages_1 |
| Col15a1.3    | 3.90E-270 | -1.209 | 0.153 | 0.475 | 7.79E-267 | Macrophages_1 |
| P2ry12.1     | 3.03E-269 | 1.001  | 0.667 | 0.284 | 6.06E-266 | Macrophages_1 |
| Tsc22d3.4    | 1.22E-268 | 0.520  | 0.804 | 0.429 | 2.44E-265 | Macrophages_1 |
| Ptpre.3      | 2.40E-268 | 0.971  | 0.681 | 0.268 | 4.80E-265 | Macrophages_1 |
| Mpp7.4       | 9.92E-268 | -2.026 | 0.133 | 0.36  | 1.98E-264 | Macrophages_1 |
| Ucp2.1       | 1.48E-266 | 0.780  | 0.601 | 0.127 | 2.96E-263 | Macrophages_1 |
| Eln.3        | 2.25E-264 | -2.213 | 0.308 | 0.572 | 4.50E-261 | Macrophages_1 |
| Fam126b.4    | 9.34E-263 | -1.320 | 0.223 | 0.382 | 1.87E-259 | Macrophages_1 |
| Ptpn14.1     | 1.49E-261 | -0.564 | 0.010 | 0.422 | 2.99E-258 | Macrophages_1 |
| Negr1.3      | 7.94E-260 | -1.354 | 0.657 | 0.791 | 1.59E-256 | Macrophages_1 |
| Ctnna3.2     | 1.28E-259 | -0.804 | 0.027 | 0.336 | 2.56E-256 | Macrophages_1 |
| Fcrls.2      | 2.01E-259 | 1.002  | 0.589 | 0.106 | 4.01E-256 | Macrophages_1 |
| Emb.3        | 6.49E-259 | 0.861  | 0.676 | 0.351 | 1.30E-255 | Macrophages_1 |
| Myo1e.2      | 2.05E-258 | -1.616 | 0.568 | 0.71  | 4.11E-255 | Macrophages_1 |
| Robo1.3      | 4.92E-252 | -2.061 | 0.449 | 0.605 | 9.84E-249 | Macrophages_1 |
| Cacna1e.2    | 1.26E-247 | -0.711 | 0.033 | 0.25  | 2.51E-244 | Macrophages_1 |
| Slit2.1      | 2.84E-247 | -1.022 | 0.111 | 0.422 | 5.69E-244 | Macrophages_1 |
| Sdc2.4       | 1.16E-245 | -1.836 | 0.473 | 0.619 | 2.33E-242 | Macrophages_1 |
| P2rx7.3      | 7.42E-244 | 0.723  | 0.709 | 0.32  | 1.48E-240 | Macrophages_1 |
| Igfbp5.4     | 1.66E-240 | -2.273 | 0.126 | 0.494 | 3.31E-237 | Macrophages_1 |
| Igf1.3       | 3.09E-237 | 0.692  | 0.902 | 0.506 | 6.19E-234 | Macrophages_1 |
| Fcna         | 6.92E-237 | 1.007  | 0.545 | 0.067 | 1.38E-233 | Macrophages_1 |
| St6galnac5.1 | 1.68E-236 | -0.623 | 0.119 | 0.352 | 3.36E-233 | Macrophages_1 |
| Ntrk3.1      | 2.42E-236 | -0.743 | 0.032 | 0.427 | 4.84E-233 | Macrophages_1 |
| Plxna2.1     | 3.57E-236 | -1.047 | 0.386 | 0.584 | 7.13E-233 | Macrophages_1 |
| Snhg11.2     | 5.34E-235 | -0.902 | 0.008 | 0.409 | 1.07E-231 | Macrophages_1 |
| Folr2        | 7.55E-235 | 0.837  | 0.561 | 0.082 | 1.51E-231 | Macrophages_1 |
| Prex2.1      | 1.03E-234 | -1.352 | 0.313 | 0.559 | 2.07E-231 | Macrophages_1 |
| Dtna.1       | 2.63E-233 | -0.688 | 0.226 | 0.396 | 5.26E-230 | Macrophages_1 |
| C9orf72.3    | 2.18E-232 | -0.783 | 0.207 | 0.332 | 4.36E-229 | Macrophages_1 |
| Sirpa.4      | 2.11E-231 | 0.706  | 0.737 | 0.411 | 4.23E-228 | Macrophages_1 |
| Plpp1.2      | 1.90E-230 | -0.766 | 0.416 | 0.527 | 3.79E-227 | Macrophages_1 |
| Ciita.4      | 2.97E-229 | 1.351  | 0.611 | 0.196 | 5.95E-226 | Macrophages_1 |
| Igfbp7.3     | 6.13E-228 | -1.380 | 0.087 | 0.464 | 1.23E-224 | Macrophages_1 |
| Ano3.3       | 1.65E-226 | -1.724 | 0.278 | 0.524 | 3.29E-223 | Macrophages_1 |
| Rad18.2      | 1.88E-226 | -0.695 | 0.384 | 0.502 | 3.76E-223 | Macrophages_1 |
| Clec4a2.2    | 2.90E-226 | 0.619  | 0.616 | 0.158 | 5.81E-223 | Macrophages_1 |
| Nnat.2       | 5.55E-223 | -1.629 | 0.010 | 0.28  | 1.11E-219 | Macrophages_1 |

|            |           |        |       |       |           |               |
|------------|-----------|--------|-------|-------|-----------|---------------|
| Adamts16.2 | 5.81E-223 | -1.246 | 0.191 | 0.422 | 1.16E-219 | Macrophages_1 |
| Ttyh2.1    | 3.15E-222 | -0.599 | 0.330 | 0.488 | 6.30E-219 | Macrophages_1 |
| C3ar1.2    | 6.64E-222 | 0.536  | 0.632 | 0.186 | 1.33E-218 | Macrophages_1 |
| Myo1d.3    | 2.91E-220 | -0.664 | 0.221 | 0.451 | 5.82E-217 | Macrophages_1 |
| Rasa1.4    | 3.55E-217 | 0.552  | 0.933 | 0.637 | 7.10E-214 | Macrophages_1 |
| Fgf10.3    | 6.24E-217 | -1.363 | 0.079 | 0.461 | 1.25E-213 | Macrophages_1 |
| Por.2      | 2.70E-215 | -0.985 | 0.263 | 0.436 | 5.40E-212 | Macrophages_1 |
| Timp3.4    | 4.04E-214 | -1.458 | 0.250 | 0.51  | 8.07E-211 | Macrophages_1 |
| Sult1e1.2  | 4.33E-214 | -1.067 | 0.055 | 0.381 | 8.66E-211 | Macrophages_1 |
| Cbfa2t3.3  | 3.53E-213 | 1.014  | 0.603 | 0.194 | 7.07E-210 | Macrophages_1 |
| Sntb1.2    | 4.61E-212 | -1.806 | 0.076 | 0.271 | 9.22E-209 | Macrophages_1 |
| Gm4951     | 1.03E-211 | 0.675  | 0.804 | 0.464 | 2.06E-208 | Macrophages_1 |
| Eya4.2     | 2.69E-211 | -1.532 | 0.504 | 0.601 | 5.39E-208 | Macrophages_1 |
| Gria3.2    | 2.14E-210 | -1.450 | 0.515 | 0.576 | 4.29E-207 | Macrophages_1 |
| Tshr.2     | 2.15E-210 | -1.955 | 0.009 | 0.264 | 4.31E-207 | Macrophages_1 |
| Sema3d.2   | 7.04E-210 | -1.168 | 0.116 | 0.432 | 1.41E-206 | Macrophages_1 |
| Mmp3.2     | 8.94E-210 | -1.012 | 0.068 | 0.37  | 1.79E-206 | Macrophages_1 |
| Samsn1.2   | 1.23E-206 | 0.535  | 0.580 | 0.134 | 2.47E-203 | Macrophages_1 |
| Cotl1.4    | 3.72E-204 | 0.686  | 0.635 | 0.217 | 7.45E-201 | Macrophages_1 |
| Lvrn.2     | 1.42E-203 | -1.834 | 0.443 | 0.58  | 2.85E-200 | Macrophages_1 |
| Gpc4.1     | 2.82E-203 | -0.784 | 0.070 | 0.42  | 5.65E-200 | Macrophages_1 |
| Nrg4.2     | 2.74E-202 | -1.392 | 0.010 | 0.26  | 5.48E-199 | Macrophages_1 |
| Ell2.3     | 5.38E-202 | -0.870 | 0.470 | 0.615 | 1.08E-198 | Macrophages_1 |
| Col4a5.3   | 7.08E-200 | -1.036 | 0.365 | 0.52  | 1.42E-196 | Macrophages_1 |
| Fcer1g.3   | 4.31E-199 | 0.723  | 0.581 | 0.15  | 8.62E-196 | Macrophages_1 |
| Gm.4       | 6.61E-199 | 0.689  | 0.659 | 0.274 | 1.32E-195 | Macrophages_1 |
| Col8a1.4   | 1.87E-198 | -1.165 | 0.172 | 0.43  | 3.74E-195 | Macrophages_1 |
| Grb14.2    | 4.51E-198 | -1.111 | 0.092 | 0.387 | 9.02E-195 | Macrophages_1 |
| Epha3.3    | 1.02E-197 | -1.541 | 0.251 | 0.491 | 2.04E-194 | Macrophages_1 |
| Aldh1a3.3  | 3.57E-196 | -0.920 | 0.076 | 0.406 | 7.14E-193 | Macrophages_1 |
| Rel.2      | 4.79E-196 | 0.550  | 0.605 | 0.223 | 9.58E-193 | Macrophages_1 |
| Col6a1.3   | 8.83E-196 | -1.093 | 0.002 | 0.395 | 1.77E-192 | Macrophages_1 |
| Fmr1.3     | 3.37E-195 | -1.121 | 0.284 | 0.381 | 6.73E-192 | Macrophages_1 |
| Clic4.1    | 2.60E-194 | -0.747 | 0.450 | 0.595 | 5.21E-191 | Macrophages_1 |
| Cdh9.2     | 4.23E-194 | -1.180 | 0.322 | 0.513 | 8.46E-191 | Macrophages_1 |
| Pkp2.1     | 6.72E-194 | -0.611 | 0.009 | 0.393 | 1.34E-190 | Macrophages_1 |
| Ngf.3      | 1.00E-193 | -0.702 | 0.064 | 0.392 | 2.00E-190 | Macrophages_1 |
| Sox6.2     | 1.95E-192 | -0.879 | 0.025 | 0.278 | 3.90E-189 | Macrophages_1 |
| Npr3.2     | 4.76E-191 | -2.609 | 0.010 | 0.264 | 9.51E-188 | Macrophages_1 |
| Hmcn2.2    | 1.67E-188 | -1.443 | 0.246 | 0.462 | 3.34E-185 | Macrophages_1 |
| H2-DMb1.1  | 2.85E-188 | 0.730  | 0.561 | 0.118 | 5.69E-185 | Macrophages_1 |
| Acox1.3    | 2.45E-184 | -1.181 | 0.281 | 0.412 | 4.91E-181 | Macrophages_1 |
| Cst3.3     | 7.07E-183 | 0.850  | 0.597 | 0.223 | 1.41E-179 | Macrophages_1 |
| C1qtnf7.3  | 1.16E-182 | -1.546 | 0.339 | 0.515 | 2.33E-179 | Macrophages_1 |
| Esrrg.1    | 4.44E-178 | -0.550 | 0.008 | 0.276 | 8.88E-175 | Macrophages_1 |
| Nrcam.1    | 7.76E-177 | -0.715 | 0.201 | 0.418 | 1.55E-173 | Macrophages_1 |
| Galnt18.1  | 3.14E-176 | -0.634 | 0.093 | 0.403 | 6.27E-173 | Macrophages_1 |
| Tmem45b.2  | 5.72E-176 | -1.822 | 0.010 | 0.273 | 1.14E-172 | Macrophages_1 |
| Rasgrp3.1  | 4.60E-174 | 0.609  | 0.614 | 0.267 | 9.21E-171 | Macrophages_1 |
| Dram1.3    | 3.34E-173 | -0.978 | 0.097 | 0.307 | 6.69E-170 | Macrophages_1 |
| Prdm16.1   | 5.96E-173 | -0.740 | 0.077 | 0.435 | 1.19E-169 | Macrophages_1 |
| Atp8b4.4   | 8.24E-169 | 0.905  | 0.660 | 0.292 | 1.65E-165 | Macrophages_1 |
| Serpinf1.3 | 2.23E-167 | -1.300 | 0.073 | 0.391 | 4.47E-164 | Macrophages_1 |
| Il1r2.2    | 1.32E-166 | -0.654 | 0.051 | 0.334 | 2.63E-163 | Macrophages_1 |
| C1qc.2     | 1.80E-165 | 1.398  | 0.566 | 0.136 | 3.60E-162 | Macrophages_1 |
| Igfbp6.3   | 9.45E-165 | -1.384 | 0.002 | 0.375 | 1.89E-161 | Macrophages_1 |
| Car8.3     | 1.23E-162 | -1.073 | 0.145 | 0.425 | 2.46E-159 | Macrophages_1 |
| Tmem135.3  | 1.65E-161 | -1.490 | 0.521 | 0.63  | 3.31E-158 | Macrophages_1 |
| Mamdc2.4   | 4.51E-158 | 1.473  | 0.637 | 0.32  | 9.02E-155 | Macrophages_1 |
| Gabre.3    | 5.58E-157 | -0.723 | 0.186 | 0.409 | 1.12E-153 | Macrophages_1 |
| C3.3       | 1.86E-155 | -1.400 | 0.087 | 0.363 | 3.72E-152 | Macrophages_1 |
| Bcl2.2     | 4.25E-155 | -0.685 | 0.554 | 0.649 | 8.49E-152 | Macrophages_1 |

|              |           |        |       |       |           |               |
|--------------|-----------|--------|-------|-------|-----------|---------------|
| Cd300lb.4    | 5.25E-152 | 0.534  | 0.651 | 0.258 | 1.05E-148 | Macrophages_1 |
| Vegfc.1      | 5.48E-152 | -0.702 | 0.210 | 0.416 | 1.10E-148 | Macrophages_1 |
| Serpinh1.2   | 1.82E-151 | -0.857 | 0.000 | 0.349 | 3.63E-148 | Macrophages_1 |
| Sntg1.3      | 8.30E-151 | -2.348 | 0.512 | 0.589 | 1.66E-147 | Macrophages_1 |
| Optn.3       | 4.86E-150 | -0.814 | 0.096 | 0.339 | 9.73E-147 | Macrophages_1 |
| Myl1.2       | 1.02E-149 | -1.089 | 0.037 | 0.254 | 2.04E-146 | Macrophages_1 |
| Batf3.1      | 2.34E-149 | 0.840  | 0.547 | 0.134 | 4.68E-146 | Macrophages_1 |
| Ppip5k1.1    | 3.67E-149 | -0.609 | 0.462 | 0.546 | 7.34E-146 | Macrophages_1 |
| Tnfr.1       | 1.93E-148 | -0.721 | 0.293 | 0.439 | 3.87E-145 | Macrophages_1 |
| Adh1.1       | 4.97E-147 | -0.535 | 0.036 | 0.35  | 9.94E-144 | Macrophages_1 |
| Hacd2.4      | 3.15E-146 | -1.733 | 0.223 | 0.312 | 6.29E-143 | Macrophages_1 |
| Csmd1.2      | 2.47E-145 | -1.403 | 0.080 | 0.368 | 4.94E-142 | Macrophages_1 |
| Gpc3.3       | 7.68E-145 | -1.217 | 0.291 | 0.47  | 1.54E-141 | Macrophages_1 |
| Pdpr.2       | 1.46E-144 | -0.644 | 0.088 | 0.387 | 2.93E-141 | Macrophages_1 |
| Adam23.2     | 9.68E-144 | -1.116 | 0.413 | 0.539 | 1.94E-140 | Macrophages_1 |
| 2810004N23R1 | 1.12E-143 | -0.577 | 0.249 | 0.326 | 2.25E-140 | Macrophages_1 |
| Cat.3        | 1.68E-143 | -0.792 | 0.237 | 0.276 | 3.35E-140 | Macrophages_1 |
| Trf.3        | 6.62E-143 | 0.933  | 0.570 | 0.172 | 1.32E-139 | Macrophages_1 |
| Slc1a3.2     | 6.74E-143 | -1.097 | 0.065 | 0.33  | 1.35E-139 | Macrophages_1 |
| Ly6a.3       | 4.14E-142 | -1.296 | 0.165 | 0.393 | 8.28E-139 | Macrophages_1 |
| Tmem51       | 2.33E-141 | 0.595  | 0.517 | 0.108 | 4.66E-138 | Macrophages_1 |
| Skint3.1     | 5.38E-140 | 1.031  | 0.511 | 0.078 | 1.08E-136 | Macrophages_1 |
| Slc11a1.2    | 1.80E-138 | 0.671  | 0.579 | 0.173 | 3.60E-135 | Macrophages_1 |
| Shroom3.1    | 2.65E-138 | -0.722 | 0.098 | 0.367 | 5.31E-135 | Macrophages_1 |
| Lpgat1.3     | 3.15E-138 | -2.050 | 0.269 | 0.371 | 6.30E-135 | Macrophages_1 |
| Klf8.1       | 5.13E-138 | 0.560  | 0.640 | 0.29  | 1.03E-134 | Macrophages_1 |
| Ccbe1.3      | 5.32E-137 | -0.957 | 0.142 | 0.382 | 1.06E-133 | Macrophages_1 |
| Cobll1.2     | 1.20E-136 | -1.011 | 0.381 | 0.455 | 2.39E-133 | Macrophages_1 |
| Enpp2.3      | 2.43E-136 | -1.611 | 0.083 | 0.427 | 4.85E-133 | Macrophages_1 |
| Ank.2        | 1.03E-134 | 0.608  | 0.698 | 0.439 | 2.06E-131 | Macrophages_1 |
| Chpt1.3      | 7.56E-133 | -1.507 | 0.097 | 0.279 | 1.51E-129 | Macrophages_1 |
| Tbc1d4.3     | 3.31E-130 | 0.803  | 0.920 | 0.709 | 6.63E-127 | Macrophages_1 |
| Ccl9.3       | 6.63E-126 | 0.592  | 0.563 | 0.167 | 1.33E-122 | Macrophages_1 |
| Chn2.3       | 1.76E-125 | 1.161  | 0.693 | 0.486 | 3.53E-122 | Macrophages_1 |
| Pde7b.4      | 7.66E-123 | 0.898  | 0.911 | 0.745 | 1.53E-119 | Macrophages_1 |
| Vcl.3        | 9.81E-123 | -0.647 | 0.487 | 0.601 | 1.96E-119 | Macrophages_1 |
| Ntn4.3       | 1.15E-122 | -1.254 | 0.255 | 0.451 | 2.31E-119 | Macrophages_1 |
| Bmp6.3       | 1.84E-122 | -1.230 | 0.358 | 0.482 | 3.67E-119 | Macrophages_1 |
| Smoc2.2      | 3.30E-122 | -1.134 | 0.300 | 0.464 | 6.60E-119 | Macrophages_1 |
| Cd44.4       | 3.60E-122 | 0.658  | 0.683 | 0.432 | 7.20E-119 | Macrophages_1 |
| Pcdh11x.1    | 5.32E-122 | -0.589 | 0.001 | 0.262 | 1.06E-118 | Macrophages_1 |
| Fam214a.2    | 4.76E-121 | -0.707 | 0.684 | 0.732 | 9.51E-118 | Macrophages_1 |
| Fat3.4       | 7.59E-121 | -0.704 | 0.609 | 0.285 | 1.52E-117 | Macrophages_1 |
| Cadm1.4      | 3.62E-120 | -0.565 | 0.639 | 0.323 | 7.23E-117 | Macrophages_1 |
| Pde11a.3     | 7.03E-120 | -1.365 | 0.288 | 0.461 | 1.41E-116 | Macrophages_1 |
| Ltc4s.1      | 1.25E-119 | 0.763  | 0.552 | 0.163 | 2.50E-116 | Macrophages_1 |
| Sfrp4.3      | 1.71E-117 | -1.009 | 0.113 | 0.344 | 3.43E-114 | Macrophages_1 |
| Tmem120b.2   | 3.03E-117 | -0.606 | 0.224 | 0.295 | 6.07E-114 | Macrophages_1 |
| Prss23.3     | 5.67E-117 | -0.922 | 0.001 | 0.319 | 1.13E-113 | Macrophages_1 |
| Gpr39.1      | 2.27E-115 | -0.538 | 0.145 | 0.354 | 4.54E-112 | Macrophages_1 |
| Ranbp17.2    | 1.44E-114 | -0.652 | 0.028 | 0.388 | 2.89E-111 | Macrophages_1 |
| Enah.2       | 1.97E-114 | -0.694 | 0.109 | 0.383 | 3.95E-111 | Macrophages_1 |
| Basp1.3      | 1.29E-113 | -0.818 | 0.423 | 0.511 | 2.59E-110 | Macrophages_1 |
| Rap1gap2.3   | 5.29E-113 | 0.927  | 0.569 | 0.232 | 1.06E-109 | Macrophages_1 |
| Dok6.1       | 7.86E-112 | -0.509 | 0.329 | 0.452 | 1.57E-108 | Macrophages_1 |
| Tspan18.1    | 1.50E-111 | -0.798 | 0.074 | 0.415 | 3.01E-108 | Macrophages_1 |
| Gucy1a2.2    | 4.88E-110 | -0.924 | 0.285 | 0.433 | 9.76E-107 | Macrophages_1 |
| Fmo2.4       | 6.23E-110 | -1.344 | 0.123 | 0.368 | 1.25E-106 | Macrophages_1 |
| Fzd4.1       | 4.14E-106 | -0.561 | 0.029 | 0.293 | 8.28E-103 | Macrophages_1 |
| Ccl8         | 1.53E-104 | 0.666  | 0.374 | 0.051 | 3.07E-101 | Macrophages_1 |
| Nhs.1        | 4.07E-104 | -0.659 | 0.047 | 0.341 | 8.14E-101 | Macrophages_1 |
| March3.1     | 1.01E-102 | -0.683 | 0.867 | 0.83  | 2.03E-99  | Macrophages_1 |



|            |           |        |       |       |          |               |
|------------|-----------|--------|-------|-------|----------|---------------|
| Cd248.3    | 1.12E-102 | -0.985 | 0.002 | 0.326 | 2.24E-99 | Macrophages_1 |
| Cd209g     | 2.25E-102 | 0.884  | 0.498 | 0.112 | 4.50E-99 | Macrophages_1 |
| Sik2.3     | 3.07E-101 | -1.485 | 0.594 | 0.637 | 6.15E-98 | Macrophages_1 |
| Fth1       | 5.09E-101 | 0.582  | 0.520 | 0.237 | 1.02E-97 | Macrophages_1 |
| Rgs6.2     | 1.88E-99  | -1.795 | 0.494 | 0.53  | 3.75E-96 | Macrophages_1 |
| Peg3.2     | 4.73E-98  | -0.839 | 0.007 | 0.339 | 9.46E-95 | Macrophages_1 |
| Meox2.2    | 1.08E-97  | -1.318 | 0.337 | 0.477 | 2.16E-94 | Macrophages_1 |
| Il1r1.1    | 8.75E-97  | 0.587  | 0.532 | 0.152 | 1.75E-93 | Macrophages_1 |
| Lhfp12.3   | 1.73E-96  | -1.506 | 0.329 | 0.504 | 3.47E-93 | Macrophages_1 |
| Bcl11a     | 5.03E-95  | 0.726  | 0.450 | 0.091 | 1.01E-91 | Macrophages_1 |
| Clec4b1.2  | 8.49E-95  | 0.627  | 0.546 | 0.166 | 1.70E-91 | Macrophages_1 |
| Map1b.3    | 1.67E-93  | -0.974 | 0.150 | 0.385 | 3.34E-90 | Macrophages_1 |
| Mycbp2.3   | 2.51E-93  | -1.202 | 0.842 | 0.857 | 5.02E-90 | Macrophages_1 |
| Sema5a.3   | 3.60E-93  | -0.828 | 0.209 | 0.418 | 7.19E-90 | Macrophages_1 |
| Irf8.1     | 1.05E-91  | 0.530  | 0.562 | 0.177 | 2.10E-88 | Macrophages_1 |
| Anxa2.3    | 1.60E-91  | -0.795 | 0.482 | 0.548 | 3.20E-88 | Macrophages_1 |
| Nrep.2     | 3.67E-91  | -0.801 | 0.183 | 0.405 | 7.35E-88 | Macrophages_1 |
| Nedd4l.2   | 5.15E-91  | -0.962 | 0.663 | 0.701 | 1.03E-87 | Macrophages_1 |
| Rgs18.1    | 8.78E-90  | 0.575  | 0.550 | 0.173 | 1.76E-86 | Macrophages_1 |
| Sgip1.3    | 9.49E-90  | -1.059 | 0.475 | 0.498 | 1.90E-86 | Macrophages_1 |
| Rorb.3     | 6.23E-89  | -1.701 | 0.475 | 0.527 | 1.25E-85 | Macrophages_1 |
| Wnt5b.1    | 4.08E-88  | -0.565 | 0.063 | 0.317 | 8.15E-85 | Macrophages_1 |
| Gpm6b.2    | 3.30E-87  | -0.992 | 0.210 | 0.404 | 6.61E-84 | Macrophages_1 |
| Slc25a21.3 | 3.03E-84  | -0.747 | 0.102 | 0.332 | 6.07E-81 | Macrophages_1 |
| Ndnf.1     | 1.36E-83  | 0.718  | 0.463 | 0.111 | 2.73E-80 | Macrophages_1 |
| Cd209d     | 3.79E-83  | 0.953  | 0.492 | 0.055 | 7.59E-80 | Macrophages_1 |
| Gas1.1     | 1.53E-81  | -0.733 | 0.000 | 0.266 | 3.06E-78 | Macrophages_1 |
| Vit.1      | 2.24E-81  | -0.609 | 0.049 | 0.295 | 4.47E-78 | Macrophages_1 |
| Tenm4.4    | 8.42E-80  | -2.557 | 0.457 | 0.4   | 1.68E-76 | Macrophages_1 |
| Rgs7bp.1   | 1.26E-79  | -0.512 | 0.349 | 0.418 | 2.53E-76 | Macrophages_1 |
| Atp1a1.3   | 1.95E-79  | 0.541  | 0.536 | 0.215 | 3.89E-76 | Macrophages_1 |
| Cdh13.2    | 7.35E-79  | -1.505 | 0.454 | 0.51  | 1.47E-75 | Macrophages_1 |
| Ism1.1     | 8.81E-78  | -0.705 | 0.188 | 0.348 | 1.76E-74 | Macrophages_1 |
| Adcy5.3    | 2.78E-77  | -0.812 | 0.010 | 0.336 | 5.55E-74 | Macrophages_1 |
| Zfp385b.2  | 8.89E-73  | -0.535 | 0.192 | 0.382 | 1.78E-69 | Macrophages_1 |
| Cadps2.2   | 4.27E-72  | -0.695 | 0.230 | 0.375 | 8.53E-69 | Macrophages_1 |
| Vegfa.1    | 5.18E-71  | -0.777 | 0.009 | 0.366 | 1.04E-67 | Macrophages_1 |
| Nipal2.2   | 4.40E-69  | -0.884 | 0.115 | 0.36  | 8.81E-66 | Macrophages_1 |
| Nav2.3     | 7.86E-67  | -0.534 | 0.634 | 0.363 | 1.57E-63 | Macrophages_1 |
| Plcxd3.3   | 3.08E-65  | -1.450 | 0.235 | 0.408 | 6.16E-62 | Macrophages_1 |
| Ralgapa2.3 | 4.23E-65  | -1.134 | 0.624 | 0.611 | 8.47E-62 | Macrophages_1 |
| Cbr2       | 7.22E-65  | 0.742  | 0.478 | 0.075 | 1.44E-61 | Macrophages_1 |
| Nr3c2.2    | 1.66E-64  | -0.792 | 0.741 | 0.671 | 3.32E-61 | Macrophages_1 |
| Fhit.2     | 2.06E-63  | -0.647 | 0.855 | 0.808 | 4.11E-60 | Macrophages_1 |
| Eepd1.4    | 4.86E-63  | -0.948 | 0.436 | 0.35  | 9.72E-60 | Macrophages_1 |
| Tmeff1.2   | 5.45E-63  | -0.581 | 0.008 | 0.315 | 1.09E-59 | Macrophages_1 |
| Gria4.3    | 1.28E-62  | -1.382 | 0.307 | 0.404 | 2.56E-59 | Macrophages_1 |
| Pparg.3    | 1.04E-60  | -1.613 | 0.583 | 0.596 | 2.09E-57 | Macrophages_1 |
| Fry.4      | 1.98E-59  | -0.559 | 0.714 | 0.428 | 3.96E-56 | Macrophages_1 |
| Dpyd.1     | 4.35E-58  | -0.823 | 0.621 | 0.596 | 8.70E-55 | Macrophages_1 |
| Mmp12.2    | 2.13E-57  | -0.757 | 0.377 | 0.157 | 4.26E-54 | Macrophages_1 |
| Thsd4.3    | 3.11E-56  | 1.092  | 0.469 | 0.22  | 6.22E-53 | Macrophages_1 |
| Sema3a.2   | 4.00E-56  | -0.770 | 0.271 | 0.388 | 7.99E-53 | Macrophages_1 |
| Bcar3.4    | 6.55E-56  | -1.360 | 0.507 | 0.395 | 1.31E-52 | Macrophages_1 |
| Ccn2.2     | 7.91E-56  | -0.653 | 0.000 | 0.251 | 1.58E-52 | Macrophages_1 |
| Adra1a.2   | 2.79E-55  | -0.509 | 0.230 | 0.321 | 5.57E-52 | Macrophages_1 |
| Celf4.2    | 1.50E-54  | 0.732  | 0.542 | 0.261 | 3.00E-51 | Macrophages_1 |
| Synpo2.1   | 1.33E-53  | -0.698 | 0.074 | 0.324 | 2.66E-50 | Macrophages_1 |
| Chrm3.1    | 7.79E-53  | -0.566 | 0.043 | 0.27  | 1.56E-49 | Macrophages_1 |
| Chst11.1   | 2.38E-52  | -0.895 | 0.590 | 0.551 | 4.76E-49 | Macrophages_1 |
| Abtb2.3    | 1.33E-51  | -0.608 | 0.354 | 0.409 | 2.66E-48 | Macrophages_1 |
| Bgn.3      | 1.84E-51  | -1.084 | 0.055 | 0.289 | 3.67E-48 | Macrophages_1 |

|            |           |        |       |       |             |               |
|------------|-----------|--------|-------|-------|-------------|---------------|
| Cd9.3      | 1.17E-48  | -0.535 | 0.248 | 0.331 | 2.33E-45    | Macrophages_1 |
| Arap2.3    | 1.34E-47  | -0.566 | 0.245 | 0.257 | 2.68E-44    | Macrophages_1 |
| Ppp2r2b.2  | 4.15E-47  | -1.495 | 0.376 | 0.452 | 8.29E-44    | Macrophages_1 |
| Thrb.2     | 4.05E-46  | -0.578 | 0.829 | 0.798 | 8.11E-43    | Macrophages_1 |
| Pilra      | 1.64E-45  | 0.526  | 0.450 | 0.082 | 3.28E-42    | Macrophages_1 |
| Nr1h4.2    | 3.88E-44  | -1.196 | 0.481 | 0.474 | 7.76E-41    | Macrophages_1 |
| Cd36.4     | 4.57E-43  | -1.085 | 0.852 | 0.495 | 9.14E-40    | Macrophages_1 |
| Ywhab.3    | 5.09E-43  | -0.596 | 0.372 | 0.354 | 1.02E-39    | Macrophages_1 |
| Apod.3     | 1.80E-42  | -0.788 | 0.127 | 0.317 | 3.61E-39    | Macrophages_1 |
| Nlgn1.2    | 5.43E-40  | -0.864 | 0.180 | 0.312 | 1.09E-36    | Macrophages_1 |
| Fabp4.3    | 9.11E-40  | -2.064 | 0.438 | 0.485 | 1.82E-36    | Macrophages_1 |
| Zranb3.2   | 1.40E-39  | -0.666 | 0.447 | 0.286 | 2.80E-36    | Macrophages_1 |
| Me1.3      | 1.14E-38  | -1.324 | 0.011 | 0.329 | 2.28E-35    | Macrophages_1 |
| Ccser1.1   | 2.30E-38  | -0.794 | 0.490 | 0.51  | 4.59E-35    | Macrophages_1 |
| Gnai1.2    | 9.41E-36  | -1.006 | 0.008 | 0.256 | 1.88E-32    | Macrophages_1 |
| Coro2a.2   | 1.41E-33  | 0.510  | 0.524 | 0.239 | 2.83E-30    | Macrophages_1 |
| Kcnq1.1    | 6.07E-31  | 0.609  | 0.648 | 0.523 | 1.21E-27    | Macrophages_1 |
| Npas2.2    | 6.99E-31  | -0.605 | 0.307 | 0.378 | 1.40E-27    | Macrophages_1 |
| Prep1.1    | 3.89E-30  | -0.637 | 0.000 | 0.276 | 7.77E-27    | Macrophages_1 |
| Cav1.2     | 8.13E-28  | -1.658 | 0.009 | 0.275 | 1.63E-24    | Macrophages_1 |
| Ppfia2.2   | 1.20E-27  | -0.614 | 0.117 | 0.295 | 2.40E-24    | Macrophages_1 |
| Sorbs1.3   | 1.41E-26  | -3.233 | 0.105 | 0.365 | 2.83E-23    | Macrophages_1 |
| Cpeb4.4    | 2.42E-26  | -0.516 | 0.820 | 0.512 | 4.84E-23    | Macrophages_1 |
| Dkk2.3     | 3.61E-26  | -1.004 | 0.307 | 0.378 | 7.22E-23    | Macrophages_1 |
| Mpeg1.3    | 3.88E-26  | 0.538  | 0.455 | 0.152 | 7.76E-23    | Macrophages_1 |
| Adamts13.2 | 1.44E-25  | -1.087 | 0.411 | 0.45  | 2.87E-22    | Macrophages_1 |
| Clybl.3    | 2.70E-25  | -0.505 | 0.652 | 0.61  | 5.41E-22    | Macrophages_1 |
| Lsamp.2    | 1.29E-24  | -0.695 | 0.210 | 0.318 | 2.59E-21    | Macrophages_1 |
| F3.2       | 7.26E-23  | -0.864 | 0.070 | 0.292 | 1.45E-19    | Macrophages_1 |
| Serpine2.1 | 1.74E-22  | -0.636 | 0.051 | 0.289 | 3.48E-19    | Macrophages_1 |
| Tspan12.2  | 4.80E-22  | -1.335 | 0.009 | 0.312 | 9.60E-19    | Macrophages_1 |
| Lpl.4      | 1.06E-20  | -1.114 | 0.598 | 0.566 | 2.11E-17    | Macrophages_1 |
| Eya2.1     | 4.14E-17  | -0.850 | 0.404 | 0.433 | 8.28E-14    | Macrophages_1 |
| Ctsl.4     | 5.88E-17  | -0.722 | 0.454 | 0.271 | 1.18E-13    | Macrophages_1 |
| Pacrg.3    | 3.78E-15  | -0.928 | 0.508 | 0.402 | 7.55E-12    | Macrophages_1 |
| Cenpp.1    | 3.19E-14  | -0.620 | 0.601 | 0.483 | 6.38E-11    | Macrophages_1 |
| BC035044   | 1.16E-13  | 0.545  | 0.432 | 0.097 | 2.32E-10    | Macrophages_1 |
| Adamts9.1  | 1.71E-12  | -0.511 | 0.069 | 0.286 | 3.42E-09    | Macrophages_1 |
| Plbd1.1    | 2.54E-12  | 0.633  | 0.447 | 0.15  | 5.07E-09    | Macrophages_1 |
| Adipor2.3  | 3.89E-11  | -1.078 | 0.470 | 0.351 | 7.78E-08    | Macrophages_1 |
| Cytip.1    | 2.04E-09  | 0.614  | 0.428 | 0.113 | 4.08E-06    | Macrophages_1 |
| Edn1.1     | 3.91E-09  | -0.520 | 0.153 | 0.291 | 7.82E-06    | Macrophages_1 |
| Igf2bp2    | 1.08E-08  | -0.505 | 0.249 | 0.279 | 2.16E-05    | Macrophages_1 |
| Calcr1.3   | 9.65E-08  | -0.795 | 0.734 | 0.619 | 0.000193    | Macrophages_1 |
| Cavin2.1   | 6.49E-06  | -0.757 | 0.006 | 0.263 | 0.01297493  | Macrophages_1 |
| Mecom.1    | 9.52E-06  | -0.651 | 0.458 | 0.424 | 0.019046823 | Macrophages_1 |
| Ikzf2      | 5.84E-05  | -0.564 | 0.695 | 0.533 | 0.116712952 | Macrophages_1 |
| Kcnq5.2    | 9.14E-05  | -1.223 | 0.561 | 0.454 | 0.182809632 | Macrophages_1 |
| Dact2.3    | 0.0001399 | -0.680 | 0.187 | 0.275 | 0.279734401 | Macrophages_1 |
| Fgf13.4    | 0.0004466 | -1.245 | 0.545 | 0.385 | 0.893177058 | Macrophages_1 |
| Tox.3      | 0.000837  | -0.847 | 0.335 | 0.328 | 1           | Macrophages_1 |
| Pde7a.2    | 0.0030498 | -0.557 | 0.805 | 0.672 | 1           | Macrophages_1 |
| Pf4        | 0.0033176 | 0.534  | 0.381 | 0.062 | 1           | Macrophages_1 |
| Art3.1     | 0.0065373 | -1.145 | 0.009 | 0.251 | 1           | Macrophages_1 |
| Osbpl3.1   | 0.008816  | -0.704 | 0.732 | 0.487 | 1           | Macrophages_1 |
| Lgals3.4   | 0         | 3.177  | 0.927 | 0.21  | 0           | Macrophages_2 |
| Gpnm4.4    | 0         | 3.110  | 0.841 | 0.321 | 0           | Macrophages_2 |
| Psap.4     | 0         | 2.985  | 0.981 | 0.445 | 0           | Macrophages_2 |
| Atp6v0d2.5 | 0         | 2.909  | 0.905 | 0.342 | 0           | Macrophages_2 |
| Cadm1.5    | 0         | 2.860  | 0.868 | 0.323 | 0           | Macrophages_2 |
| St18.4     | 0         | 2.716  | 0.905 | 0.36  | 0           | Macrophages_2 |
| Myo1e.3    | 0         | 2.523  | 0.947 | 0.627 | 0           | Macrophages_2 |

|             |   |       |       |       |   |               |
|-------------|---|-------|-------|-------|---|---------------|
| Fat3.5      | 0 | 2.444 | 0.768 | 0.297 | 0 | Macrophages_2 |
| Ctsd.3      | 0 | 2.382 | 0.836 | 0.213 | 0 | Macrophages_2 |
| Ctsb.5      | 0 | 2.317 | 0.959 | 0.373 | 0 | Macrophages_2 |
| Mmp12.3     | 0 | 2.271 | 0.641 | 0.139 | 0 | Macrophages_2 |
| Lipa.2      | 0 | 2.226 | 0.904 | 0.203 | 0 | Macrophages_2 |
| Alcam.3     | 0 | 2.181 | 0.989 | 0.448 | 0 | Macrophages_2 |
| Arhgap25.4  | 0 | 2.161 | 0.878 | 0.313 | 0 | Macrophages_2 |
| Plin2.3     | 0 | 2.116 | 0.953 | 0.411 | 0 | Macrophages_2 |
| Evl.4       | 0 | 2.093 | 0.910 | 0.292 | 0 | Macrophages_2 |
| Ctsl.5      | 0 | 2.081 | 0.730 | 0.246 | 0 | Macrophages_2 |
| Apobec1.4   | 0 | 2.031 | 0.982 | 0.463 | 0 | Macrophages_2 |
| Lpl.5       | 0 | 2.005 | 0.940 | 0.511 | 0 | Macrophages_2 |
| Nceh1.2     | 0 | 1.985 | 0.902 | 0.276 | 0 | Macrophages_2 |
| Cd36.5      | 0 | 1.978 | 0.977 | 0.518 | 0 | Macrophages_2 |
| Cd84.5      | 0 | 1.917 | 0.953 | 0.385 | 0 | Macrophages_2 |
| Osbpl8.3    | 0 | 1.899 | 0.980 | 0.704 | 0 | Macrophages_2 |
| Cd44.5      | 0 | 1.860 | 0.944 | 0.417 | 0 | Macrophages_2 |
| Atp6v0a1.4  | 0 | 1.853 | 0.963 | 0.602 | 0 | Macrophages_2 |
| Fnip2.4     | 0 | 1.839 | 0.894 | 0.722 | 0 | Macrophages_2 |
| Myo1f.5     | 0 | 1.828 | 0.978 | 0.436 | 0 | Macrophages_2 |
| Specc1.4    | 0 | 1.824 | 0.934 | 0.45  | 0 | Macrophages_2 |
| Zranb3.3    | 0 | 1.809 | 0.736 | 0.256 | 0 | Macrophages_2 |
| Lcp1.5      | 0 | 1.770 | 0.963 | 0.379 | 0 | Macrophages_2 |
| Gas2l3.3    | 0 | 1.724 | 0.877 | 0.319 | 0 | Macrophages_2 |
| Ctss.5      | 0 | 1.680 | 0.872 | 0.26  | 0 | Macrophages_2 |
| Pitpnc1.5   | 0 | 1.659 | 0.972 | 0.68  | 0 | Macrophages_2 |
| Rbm47.5     | 0 | 1.639 | 0.968 | 0.524 | 0 | Macrophages_2 |
| Atp6v1b2.3  | 0 | 1.622 | 0.912 | 0.49  | 0 | Macrophages_2 |
| Fam129b.1   | 0 | 1.611 | 0.780 | 0.324 | 0 | Macrophages_2 |
| Cacna1d.5   | 0 | 1.603 | 0.854 | 0.412 | 0 | Macrophages_2 |
| Cd180.4     | 0 | 1.596 | 0.839 | 0.233 | 0 | Macrophages_2 |
| Abhd12.5    | 0 | 1.594 | 0.949 | 0.498 | 0 | Macrophages_2 |
| Rasa1.5     | 0 | 1.574 | 0.960 | 0.668 | 0 | Macrophages_2 |
| Blnk.5      | 0 | 1.565 | 0.934 | 0.401 | 0 | Macrophages_2 |
| Efr3b.1     | 0 | 1.562 | 0.735 | 0.267 | 0 | Macrophages_2 |
| Rgs1.1      | 0 | 1.559 | 0.690 | 0.159 | 0 | Macrophages_2 |
| Prkch.3     | 0 | 1.558 | 0.888 | 0.371 | 0 | Macrophages_2 |
| Ubash3b.5   | 0 | 1.544 | 0.856 | 0.4   | 0 | Macrophages_2 |
| Tnfrsf11a.5 | 0 | 1.535 | 0.887 | 0.379 | 0 | Macrophages_2 |
| Tnip3.3     | 0 | 1.534 | 0.621 | 0.19  | 0 | Macrophages_2 |
| Lgmn.5      | 0 | 1.512 | 0.921 | 0.361 | 0 | Macrophages_2 |
| Slc37a2.2   | 0 | 1.480 | 0.801 | 0.229 | 0 | Macrophages_2 |
| Ptchd1.3    | 0 | 1.468 | 0.754 | 0.259 | 0 | Macrophages_2 |
| Sirpa.5     | 0 | 1.468 | 0.905 | 0.422 | 0 | Macrophages_2 |
| Adam8.2     | 0 | 1.461 | 0.739 | 0.148 | 0 | Macrophages_2 |
| Cd200r1.5   | 0 | 1.459 | 0.872 | 0.361 | 0 | Macrophages_2 |
| Nav2.4      | 0 | 1.443 | 0.789 | 0.37  | 0 | Macrophages_2 |
| Card11.3    | 0 | 1.433 | 0.707 | 0.275 | 0 | Macrophages_2 |
| Bcar3.5     | 0 | 1.420 | 0.895 | 0.342 | 0 | Macrophages_2 |
| Tcirg1.2    | 0 | 1.387 | 0.810 | 0.276 | 0 | Macrophages_2 |
| Tns3.4      | 0 | 1.386 | 0.891 | 0.422 | 0 | Macrophages_2 |
| Atp6v1a.3   | 0 | 1.385 | 0.871 | 0.432 | 0 | Macrophages_2 |
| Ftl1.4      | 0 | 1.374 | 0.714 | 0.239 | 0 | Macrophages_2 |
| Il7r.4      | 0 | 1.354 | 0.696 | 0.216 | 0 | Macrophages_2 |
| Cdk6.3      | 0 | 1.341 | 0.806 | 0.447 | 0 | Macrophages_2 |
| Fnbp1l.3    | 0 | 1.333 | 0.805 | 0.337 | 0 | Macrophages_2 |
| Gusb.2      | 0 | 1.319 | 0.757 | 0.176 | 0 | Macrophages_2 |
| Mfsd12      | 0 | 1.307 | 0.756 | 0.135 | 0 | Macrophages_2 |
| Trem2       | 0 | 1.293 | 0.694 | 0.131 | 0 | Macrophages_2 |
| Soat1.4     | 0 | 1.282 | 0.781 | 0.262 | 0 | Macrophages_2 |
| Pik3r5.5    | 0 | 1.270 | 0.818 | 0.329 | 0 | Macrophages_2 |
| Shtn1.5     | 0 | 1.260 | 0.932 | 0.394 | 0 | Macrophages_2 |

|            |   |       |       |       |   |               |
|------------|---|-------|-------|-------|---|---------------|
| Slc6a6.4   | 0 | 1.239 | 0.932 | 0.491 | 0 | Macrophages_2 |
| Hexa.4     | 0 | 1.238 | 0.839 | 0.325 | 0 | Macrophages_2 |
| mt-Nd6.2   | 0 | 1.236 | 0.925 | 0.654 | 0 | Macrophages_2 |
| Cd300lb.5  | 0 | 1.226 | 0.797 | 0.281 | 0 | Macrophages_2 |
| Atp8b4.5   | 0 | 1.226 | 0.873 | 0.301 | 0 | Macrophages_2 |
| Ctsz.3     | 0 | 1.217 | 0.708 | 0.226 | 0 | Macrophages_2 |
| Gm.5       | 0 | 1.216 | 0.764 | 0.303 | 0 | Macrophages_2 |
| Mki67.1    | 0 | 1.215 | 0.624 | 0.224 | 0 | Macrophages_2 |
| Igf2bp2.1  | 0 | 1.212 | 0.689 | 0.199 | 0 | Macrophages_2 |
| Lrp12.1    | 0 | 1.187 | 0.789 | 0.48  | 0 | Macrophages_2 |
| Hpgds.3    | 0 | 1.171 | 0.809 | 0.381 | 0 | Macrophages_2 |
| Csf2ra.5   | 0 | 1.169 | 0.865 | 0.332 | 0 | Macrophages_2 |
| Plxna4.5   | 0 | 1.156 | 0.791 | 0.426 | 0 | Macrophages_2 |
| Slc16a10.4 | 0 | 1.155 | 0.921 | 0.535 | 0 | Macrophages_2 |
| Lmna.1     | 0 | 1.154 | 0.691 | 0.278 | 0 | Macrophages_2 |
| Lilr4b.4   | 0 | 1.150 | 0.741 | 0.263 | 0 | Macrophages_2 |
| Trim25.5   | 0 | 1.148 | 0.794 | 0.431 | 0 | Macrophages_2 |
| Wfs1       | 0 | 1.147 | 0.566 | 0.121 | 0 | Macrophages_2 |
| Noct.3     | 0 | 1.127 | 0.812 | 0.38  | 0 | Macrophages_2 |
| Hmga2      | 0 | 1.120 | 0.587 | 0.174 | 0 | Macrophages_2 |
| Nckap1l.5  | 0 | 1.120 | 0.888 | 0.352 | 0 | Macrophages_2 |
| Top2a.1    | 0 | 1.120 | 0.631 | 0.212 | 0 | Macrophages_2 |
| Myo10.1    | 0 | 1.119 | 0.764 | 0.345 | 0 | Macrophages_2 |
| Gm38248    | 0 | 1.093 | 0.617 | 0.185 | 0 | Macrophages_2 |
| B4galt5.3  | 0 | 1.081 | 0.837 | 0.499 | 0 | Macrophages_2 |
| Adgre1.5   | 0 | 1.079 | 0.915 | 0.427 | 0 | Macrophages_2 |
| Cpeb4.5    | 0 | 1.070 | 0.907 | 0.535 | 0 | Macrophages_2 |
| Insyn2b.5  | 0 | 1.069 | 0.804 | 0.361 | 0 | Macrophages_2 |
| Pik3ap1.4  | 0 | 1.068 | 0.873 | 0.42  | 0 | Macrophages_2 |
| Itgb2.4    | 0 | 1.065 | 0.712 | 0.168 | 0 | Macrophages_2 |
| Stap1.3    | 0 | 1.064 | 0.632 | 0.217 | 0 | Macrophages_2 |
| Pld3       | 0 | 1.060 | 0.608 | 0.142 | 0 | Macrophages_2 |
| Calm2.2    | 0 | 1.059 | 0.817 | 0.389 | 0 | Macrophages_2 |
| Fyb.5      | 0 | 1.053 | 0.942 | 0.456 | 0 | Macrophages_2 |
| Kcnk13.5   | 0 | 1.052 | 0.849 | 0.408 | 0 | Macrophages_2 |
| Rnf128     | 0 | 1.050 | 0.698 | 0.16  | 0 | Macrophages_2 |
| Nrp2.5     | 0 | 1.024 | 0.811 | 0.37  | 0 | Macrophages_2 |
| Clec12a.3  | 0 | 1.022 | 0.717 | 0.201 | 0 | Macrophages_2 |
| Rnf149.4   | 0 | 1.020 | 0.804 | 0.357 | 0 | Macrophages_2 |
| Tec.5      | 0 | 1.015 | 0.820 | 0.374 | 0 | Macrophages_2 |
| Slc25a13.2 | 0 | 1.012 | 0.719 | 0.271 | 0 | Macrophages_2 |
| Cd300a.5   | 0 | 1.011 | 0.788 | 0.292 | 0 | Macrophages_2 |
| Ctsa.3     | 0 | 1.010 | 0.677 | 0.186 | 0 | Macrophages_2 |
| Mtss1.4    | 0 | 0.997 | 0.956 | 0.552 | 0 | Macrophages_2 |
| Lat2.1     | 0 | 0.990 | 0.678 | 0.177 | 0 | Macrophages_2 |
| Ptpn22.5   | 0 | 0.983 | 0.765 | 0.299 | 0 | Macrophages_2 |
| Ehd4.5     | 0 | 0.979 | 0.853 | 0.381 | 0 | Macrophages_2 |
| Akr1a1.2   | 0 | 0.956 | 0.744 | 0.321 | 0 | Macrophages_2 |
| Dot1l      | 0 | 0.953 | 0.750 | 0.396 | 0 | Macrophages_2 |
| Cd68       | 0 | 0.922 | 0.600 | 0.129 | 0 | Macrophages_2 |
| Neil3.1    | 0 | 0.914 | 0.576 | 0.221 | 0 | Macrophages_2 |
| Tmem106a.5 | 0 | 0.909 | 0.801 | 0.334 | 0 | Macrophages_2 |
| Actn1      | 0 | 0.907 | 0.676 | 0.257 | 0 | Macrophages_2 |
| Kcnn4      | 0 | 0.903 | 0.579 | 0.113 | 0 | Macrophages_2 |
| Ankdd1a    | 0 | 0.900 | 0.659 | 0.181 | 0 | Macrophages_2 |
| Fam20c     | 0 | 0.876 | 0.687 | 0.254 | 0 | Macrophages_2 |
| C3ar1.3    | 0 | 0.863 | 0.697 | 0.229 | 0 | Macrophages_2 |
| Capg       | 0 | 0.851 | 0.624 | 0.167 | 0 | Macrophages_2 |
| St8sia4.5  | 0 | 0.848 | 0.794 | 0.341 | 0 | Macrophages_2 |
| Naa50.1    | 0 | 0.817 | 0.738 | 0.327 | 0 | Macrophages_2 |
| Gpr137b    | 0 | 0.809 | 0.661 | 0.25  | 0 | Macrophages_2 |
| Efh2       | 0 | 0.779 | 0.658 | 0.199 | 0 | Macrophages_2 |

|            |           |        |       |       |           |               |
|------------|-----------|--------|-------|-------|-----------|---------------|
| Spi1.5     | 0         | 0.777  | 0.774 | 0.323 | 0         | Macrophages_2 |
| Plxdc1     | 0         | 0.755  | 0.656 | 0.213 | 0         | Macrophages_2 |
| Wdfy4.5    | 0         | 0.747  | 0.812 | 0.348 | 0         | Macrophages_2 |
| Cdk15      | 0         | 0.738  | 0.642 | 0.237 | 0         | Macrophages_2 |
| Cpe        | 0         | 0.734  | 0.632 | 0.217 | 0         | Macrophages_2 |
| Aph1c      | 0         | 0.717  | 0.634 | 0.227 | 0         | Macrophages_2 |
| C5ar1.5    | 0         | 0.703  | 0.696 | 0.272 | 0         | Macrophages_2 |
| Kif23.1    | 0         | 0.693  | 0.568 | 0.187 | 0         | Macrophages_2 |
| Brca1.1    | 0         | 0.681  | 0.644 | 0.311 | 0         | Macrophages_2 |
| Myh15      | 0         | 0.664  | 0.575 | 0.183 | 0         | Macrophages_2 |
| Gm15155    | 0         | 0.657  | 0.592 | 0.247 | 0         | Macrophages_2 |
| Plau       | 0         | 0.648  | 0.560 | 0.114 | 0         | Macrophages_2 |
| Lair1.1    | 0         | 0.626  | 0.673 | 0.276 | 0         | Macrophages_2 |
| Tm4sf19    | 0         | 0.521  | 0.513 | 0.123 | 0         | Macrophages_2 |
| Tns1.2     | 0         | -1.592 | 0.679 | 0.89  | 0         | Macrophages_2 |
| Itih5.4    | 0         | -1.679 | 0.242 | 0.593 | 0         | Macrophages_2 |
| Arhgap29.3 | 0         | -1.682 | 0.274 | 0.601 | 0         | Macrophages_2 |
| Tead1.4    | 0         | -1.997 | 0.405 | 0.715 | 0         | Macrophages_2 |
| Eda.3      | 0         | -2.226 | 0.453 | 0.74  | 0         | Macrophages_2 |
| Ptprm.3    | 0         | -2.233 | 0.523 | 0.828 | 0         | Macrophages_2 |
| Sparc.4    | 0         | -2.268 | 0.217 | 0.627 | 0         | Macrophages_2 |
| Ptprg.4    | 0         | -2.302 | 0.416 | 0.728 | 0         | Macrophages_2 |
| Svep1.3    | 0         | -2.374 | 0.308 | 0.683 | 0         | Macrophages_2 |
| Lama4.3    | 0         | -2.551 | 0.417 | 0.689 | 0         | Macrophages_2 |
| Adamts12.3 | 0         | -2.577 | 0.472 | 0.781 | 0         | Macrophages_2 |
| Aldh1a1.4  | 0         | -2.649 | 0.476 | 0.774 | 0         | Macrophages_2 |
| Adamts5.3  | 0         | -2.883 | 0.426 | 0.728 | 0         | Macrophages_2 |
| Adamts1.5  | 0         | -2.904 | 0.458 | 0.787 | 0         | Macrophages_2 |
| Mid1.4     | 0         | -3.016 | 0.385 | 0.755 | 0         | Macrophages_2 |
| Dcn.4      | 0         | -3.104 | 0.306 | 0.674 | 0         | Macrophages_2 |
| Gsn.3      | 0         | -3.628 | 0.276 | 0.777 | 0         | Macrophages_2 |
| Col3a1.5   | 0         | -3.805 | 0.472 | 0.782 | 0         | Macrophages_2 |
| Nox4.4     | 8.63E-308 | -3.085 | 0.481 | 0.736 | 1.73E-304 | Macrophages_2 |
| Vim.1      | 1.21E-307 | 1.081  | 0.731 | 0.36  | 2.42E-304 | Macrophages_2 |
| Lonrf3     | 1.43E-306 | 0.810  | 0.660 | 0.353 | 2.86E-303 | Macrophages_2 |
| Mpeg1.4    | 3.79E-305 | 0.796  | 0.619 | 0.161 | 7.59E-302 | Macrophages_2 |
| Vgl1.2     | 1.50E-304 | -2.008 | 0.350 | 0.64  | 2.99E-301 | Macrophages_2 |
| P2rx7.4    | 2.23E-304 | 0.718  | 0.747 | 0.361 | 4.47E-301 | Macrophages_2 |
| Thsd7a.4   | 2.59E-303 | -2.576 | 0.451 | 0.734 | 5.17E-300 | Macrophages_2 |
| Col12a1.4  | 1.47E-301 | -1.283 | 0.049 | 0.441 | 2.93E-298 | Macrophages_2 |
| Ptprd.3    | 5.19E-301 | -2.166 | 0.354 | 0.633 | 1.04E-297 | Macrophages_2 |
| Mfap5.4    | 3.05E-300 | -2.136 | 0.217 | 0.577 | 6.10E-297 | Macrophages_2 |
| Slc39a11   | 7.53E-300 | 1.218  | 0.817 | 0.554 | 1.51E-296 | Macrophages_2 |
| Fgf13.5    | 1.17E-295 | 1.780  | 0.726 | 0.374 | 2.34E-292 | Macrophages_2 |
| Col1a2.5   | 3.57E-295 | -3.134 | 0.406 | 0.668 | 7.14E-292 | Macrophages_2 |
| Elf4a1     | 1.53E-294 | 0.818  | 0.659 | 0.273 | 3.06E-291 | Macrophages_2 |
| Atp1a1.4   | 2.63E-294 | 0.724  | 0.660 | 0.233 | 5.26E-291 | Macrophages_2 |
| Dst.3      | 5.93E-293 | -2.543 | 0.406 | 0.701 | 1.19E-289 | Macrophages_2 |
| F7         | 1.29E-289 | 0.958  | 0.543 | 0.149 | 2.59E-286 | Macrophages_2 |
| Ghr.5      | 2.88E-289 | -4.405 | 0.446 | 0.686 | 5.75E-286 | Macrophages_2 |
| Gramd1b.3  | 6.86E-289 | 0.800  | 0.758 | 0.39  | 1.37E-285 | Macrophages_2 |
| Adap2.4    | 9.46E-289 | 0.702  | 0.888 | 0.516 | 1.89E-285 | Macrophages_2 |
| Ywhah      | 3.01E-288 | 0.647  | 0.611 | 0.206 | 6.02E-285 | Macrophages_2 |
| Col6a3.3   | 1.03E-287 | -1.611 | 0.218 | 0.593 | 2.06E-284 | Macrophages_2 |
| Pik3cb.4   | 7.80E-287 | 0.714  | 0.717 | 0.293 | 1.56E-283 | Macrophages_2 |
| Abcg1.2    | 9.53E-287 | 0.929  | 0.668 | 0.252 | 1.91E-283 | Macrophages_2 |
| Pltp.4     | 4.06E-283 | 0.839  | 0.829 | 0.376 | 8.11E-280 | Macrophages_2 |
| Col14a1.4  | 5.78E-281 | -2.722 | 0.448 | 0.708 | 1.16E-277 | Macrophages_2 |
| Cenpe.1    | 4.06E-279 | 0.698  | 0.551 | 0.196 | 8.12E-276 | Macrophages_2 |
| Cd200r4    | 6.37E-279 | 0.608  | 0.572 | 0.194 | 1.27E-275 | Macrophages_2 |
| Cybb.5     | 2.40E-276 | 0.783  | 0.720 | 0.288 | 4.79E-273 | Macrophages_2 |
| Col6a2.3   | 5.09E-275 | -1.323 | 0.052 | 0.467 | 1.02E-271 | Macrophages_2 |

|           |           |        |       |       |           |               |
|-----------|-----------|--------|-------|-------|-----------|---------------|
| Mical2.1  | 1.05E-274 | 0.913  | 0.720 | 0.405 | 2.10E-271 | Macrophages_2 |
| Grk3.4    | 1.34E-274 | 0.632  | 0.682 | 0.303 | 2.67E-271 | Macrophages_2 |
| Pi16.3    | 2.65E-274 | -2.644 | 0.244 | 0.565 | 5.29E-271 | Macrophages_2 |
| Pacrg.4   | 1.60E-273 | 0.691  | 0.704 | 0.381 | 3.20E-270 | Macrophages_2 |
| Sema3d.3  | 2.78E-273 | -1.076 | 0.027 | 0.409 | 5.56E-270 | Macrophages_2 |
| Nrip1.4   | 2.73E-269 | -2.021 | 0.452 | 0.748 | 5.47E-266 | Macrophages_2 |
| Tpm1      | 3.05E-268 | 0.753  | 0.640 | 0.268 | 6.10E-265 | Macrophages_2 |
| Col5a3.4  | 5.98E-266 | -1.629 | 0.298 | 0.607 | 1.20E-262 | Macrophages_2 |
| Postn.5   | 3.97E-264 | -1.561 | 0.100 | 0.479 | 7.94E-261 | Macrophages_2 |
| Msr1.5    | 5.67E-264 | 0.659  | 0.708 | 0.341 | 1.13E-260 | Macrophages_2 |
| Aplp2.4   | 7.95E-263 | 0.801  | 0.831 | 0.454 | 1.59E-259 | Macrophages_2 |
| Clec3b.4  | 1.61E-259 | -2.070 | 0.191 | 0.556 | 3.22E-256 | Macrophages_2 |
| Ggta1     | 3.77E-259 | 0.891  | 0.598 | 0.22  | 7.55E-256 | Macrophages_2 |
| Cotl1.5   | 4.84E-259 | 0.754  | 0.683 | 0.259 | 9.67E-256 | Macrophages_2 |
| Kn1l.1    | 1.10E-258 | 1.041  | 0.588 | 0.229 | 2.21E-255 | Macrophages_2 |
| Entpd1.5  | 7.18E-258 | 0.861  | 0.794 | 0.439 | 1.44E-254 | Macrophages_2 |
| Bmper.2   | 2.63E-257 | -1.668 | 0.376 | 0.639 | 5.26E-254 | Macrophages_2 |
| Cd9.4     | 2.18E-248 | 0.802  | 0.644 | 0.252 | 4.36E-245 | Macrophages_2 |
| Acss3.2   | 3.83E-248 | -2.087 | 0.416 | 0.636 | 7.66E-245 | Macrophages_2 |
| Ulbp1     | 1.23E-247 | 0.698  | 0.592 | 0.237 | 2.46E-244 | Macrophages_2 |
| Ap1s3     | 2.45E-244 | 0.585  | 0.538 | 0.182 | 4.90E-241 | Macrophages_2 |
| Clec4a2.3 | 9.66E-240 | 0.664  | 0.616 | 0.214 | 1.93E-236 | Macrophages_2 |
| Ell2.4    | 1.04E-238 | 0.941  | 0.820 | 0.537 | 2.09E-235 | Macrophages_2 |
| Ctsk      | 2.10E-238 | 0.662  | 0.485 | 0.12  | 4.20E-235 | Macrophages_2 |
| Incenp.1  | 1.09E-237 | 0.551  | 0.540 | 0.204 | 2.19E-234 | Macrophages_2 |
| Anxa2.4   | 2.10E-237 | 0.721  | 0.811 | 0.483 | 4.20E-234 | Macrophages_2 |
| Fbln2.5   | 3.24E-237 | -1.635 | 0.132 | 0.51  | 6.48E-234 | Macrophages_2 |
| Asph.2    | 7.77E-237 | 0.993  | 0.931 | 0.733 | 1.55E-233 | Macrophages_2 |
| Nr3c2.3   | 8.10E-234 | -1.445 | 0.504 | 0.721 | 1.62E-230 | Macrophages_2 |
| Pcolce2.3 | 2.88E-233 | -1.587 | 0.199 | 0.527 | 5.75E-230 | Macrophages_2 |
| Aox1.2    | 1.95E-232 | -1.261 | 0.223 | 0.512 | 3.90E-229 | Macrophages_2 |
| Mafb.5    | 2.41E-231 | 0.760  | 0.702 | 0.283 | 4.82E-228 | Macrophages_2 |
| Sgcd.4    | 4.78E-231 | -3.026 | 0.443 | 0.638 | 9.56E-228 | Macrophages_2 |
| Sema3e.4  | 2.11E-229 | -2.174 | 0.321 | 0.573 | 4.22E-226 | Macrophages_2 |
| Rab7b.1   | 2.27E-228 | 0.874  | 0.764 | 0.483 | 4.54E-225 | Macrophages_2 |
| Itgbl1.3  | 6.36E-228 | -2.626 | 0.467 | 0.689 | 1.27E-224 | Macrophages_2 |
| Cyba      | 9.20E-227 | 0.722  | 0.555 | 0.173 | 1.84E-223 | Macrophages_2 |
| Clic1     | 1.57E-224 | 0.642  | 0.599 | 0.233 | 3.15E-221 | Macrophages_2 |
| Kif15.1   | 8.58E-224 | 0.933  | 0.578 | 0.254 | 1.72E-220 | Macrophages_2 |
| Tenm4.5   | 3.82E-223 | -0.740 | 0.783 | 0.351 | 7.65E-220 | Macrophages_2 |
| Vdac2     | 8.69E-223 | 0.584  | 0.594 | 0.242 | 1.74E-219 | Macrophages_2 |
| Bcl2l1    | 1.20E-219 | 0.918  | 0.772 | 0.553 | 2.41E-216 | Macrophages_2 |
| Igfbp5.5  | 5.71E-219 | -2.119 | 0.110 | 0.451 | 1.14E-215 | Macrophages_2 |
| Pcsk5.3   | 1.18E-218 | -2.076 | 0.431 | 0.66  | 2.36E-215 | Macrophages_2 |
| Sec61g    | 1.03E-216 | 0.642  | 0.521 | 0.155 | 2.07E-213 | Macrophages_2 |
| Xylt1.1   | 1.30E-216 | 0.999  | 0.839 | 0.583 | 2.61E-213 | Macrophages_2 |
| Efna5.5   | 3.38E-216 | -2.501 | 0.457 | 0.675 | 6.76E-213 | Macrophages_2 |
| Rel.3     | 2.80E-215 | 0.604  | 0.621 | 0.267 | 5.60E-212 | Macrophages_2 |
| Ank.3     | 6.14E-215 | 0.770  | 0.782 | 0.456 | 1.23E-211 | Macrophages_2 |
| Sdc2.5    | 1.70E-214 | -1.665 | 0.370 | 0.619 | 3.40E-211 | Macrophages_2 |
| Diaph3.3  | 2.20E-214 | 1.334  | 0.712 | 0.483 | 4.40E-211 | Macrophages_2 |
| Prkd1.4   | 4.87E-213 | -2.454 | 0.416 | 0.61  | 9.73E-210 | Macrophages_2 |
| Ccr5.5    | 8.27E-213 | 0.856  | 0.645 | 0.297 | 1.65E-209 | Macrophages_2 |
| Wwtr1.3   | 1.82E-211 | -1.467 | 0.333 | 0.565 | 3.64E-208 | Macrophages_2 |
| Sntg1.4   | 1.56E-210 | -2.259 | 0.352 | 0.607 | 3.11E-207 | Macrophages_2 |
| Shisa9    | 4.08E-210 | 0.557  | 0.600 | 0.362 | 8.16E-207 | Macrophages_2 |
| Auts2.4   | 5.25E-205 | -2.223 | 0.470 | 0.696 | 1.05E-201 | Macrophages_2 |
| Ccl9.4    | 1.03E-204 | 0.765  | 0.596 | 0.21  | 2.06E-201 | Macrophages_2 |
| Tmem165.1 | 2.36E-204 | 0.752  | 0.790 | 0.52  | 4.73E-201 | Macrophages_2 |
| Pdzd2.3   | 1.68E-203 | -1.732 | 0.296 | 0.572 | 3.35E-200 | Macrophages_2 |
| Pkm       | 9.36E-201 | 0.640  | 0.573 | 0.228 | 1.87E-197 | Macrophages_2 |
| Abca8a.4  | 1.42E-200 | -2.101 | 0.413 | 0.62  | 2.83E-197 | Macrophages_2 |

|           |           |        |       |       |           |               |
|-----------|-----------|--------|-------|-------|-----------|---------------|
| Sms       | 3.65E-200 | 0.575  | 0.557 | 0.224 | 7.30E-197 | Macrophages_2 |
| Slc11a1.3 | 6.39E-199 | 0.610  | 0.595 | 0.22  | 1.28E-195 | Macrophages_2 |
| Osbp13.2  | 1.93E-198 | 0.613  | 0.752 | 0.513 | 3.87E-195 | Macrophages_2 |
| Foxo1.2   | 1.04E-196 | -1.603 | 0.457 | 0.699 | 2.07E-193 | Macrophages_2 |
| Slc7a8.4  | 1.60E-196 | 0.618  | 0.682 | 0.364 | 3.19E-193 | Macrophages_2 |
| Prkcb.5   | 1.03E-195 | 0.779  | 0.752 | 0.417 | 2.05E-192 | Macrophages_2 |
| Ccdc80.3  | 2.55E-195 | -2.114 | 0.287 | 0.559 | 5.10E-192 | Macrophages_2 |
| Gfpt2.4   | 8.89E-195 | -2.272 | 0.363 | 0.6   | 1.78E-191 | Macrophages_2 |
| Thrb.3    | 2.14E-194 | -1.376 | 0.684 | 0.827 | 4.28E-191 | Macrophages_2 |
| Epn2.2    | 1.11E-193 | -1.740 | 0.274 | 0.597 | 2.21E-190 | Macrophages_2 |
| Rnh1      | 1.18E-193 | 0.577  | 0.587 | 0.253 | 2.36E-190 | Macrophages_2 |
| Cit.1     | 5.20E-192 | 0.639  | 0.548 | 0.251 | 1.04E-188 | Macrophages_2 |
| Vcan.4    | 6.19E-191 | -1.741 | 0.318 | 0.597 | 1.24E-187 | Macrophages_2 |
| Kif11.1   | 1.35E-190 | 0.767  | 0.542 | 0.247 | 2.69E-187 | Macrophages_2 |
| Rasgef1b  | 1.54E-190 | 0.637  | 0.634 | 0.391 | 3.08E-187 | Macrophages_2 |
| Smc2.1    | 2.87E-189 | 0.575  | 0.473 | 0.164 | 5.75E-186 | Macrophages_2 |
| Hspa5.1   | 1.08E-187 | 0.839  | 0.666 | 0.355 | 2.15E-184 | Macrophages_2 |
| Clec4b1.3 | 3.24E-187 | 0.704  | 0.577 | 0.207 | 6.47E-184 | Macrophages_2 |
| Rps6ka2   | 4.14E-186 | 0.575  | 0.559 | 0.292 | 8.27E-183 | Macrophages_2 |
| Dclk1.5   | 4.17E-186 | -1.705 | 0.417 | 0.635 | 8.34E-183 | Macrophages_2 |
| Ccbe1.4   | 6.37E-186 | -0.856 | 0.121 | 0.356 | 1.27E-182 | Macrophages_2 |
| F3.3      | 9.08E-185 | -0.657 | 0.089 | 0.261 | 1.82E-181 | Macrophages_2 |
| Anxa5.2   | 2.97E-184 | 0.656  | 0.610 | 0.307 | 5.93E-181 | Macrophages_2 |
| Tpx2.1    | 4.96E-184 | 0.645  | 0.529 | 0.223 | 9.93E-181 | Macrophages_2 |
| Calr      | 7.39E-183 | 0.786  | 0.581 | 0.258 | 1.48E-179 | Macrophages_2 |
| Smc4.2    | 2.14E-182 | 0.813  | 0.659 | 0.384 | 4.29E-179 | Macrophages_2 |
| Atf3      | 2.39E-182 | 0.960  | 0.508 | 0.111 | 4.77E-179 | Macrophages_2 |
| Nek6      | 4.63E-182 | 0.663  | 0.693 | 0.492 | 9.26E-179 | Macrophages_2 |
| Lyz2.5    | 1.76E-180 | 0.752  | 0.681 | 0.274 | 3.53E-177 | Macrophages_2 |
| Col1a1.4  | 3.54E-179 | -2.378 | 0.263 | 0.539 | 7.07E-176 | Macrophages_2 |
| Adam23.3  | 4.81E-179 | -1.063 | 0.327 | 0.538 | 9.62E-176 | Macrophages_2 |
| B3galt1.2 | 1.33E-178 | -2.015 | 0.427 | 0.62  | 2.66E-175 | Macrophages_2 |
| Itgax     | 2.78E-177 | 0.862  | 0.499 | 0.115 | 5.56E-174 | Macrophages_2 |
| H3f3b     | 6.97E-176 | 0.605  | 0.561 | 0.233 | 1.39E-172 | Macrophages_2 |
| Cd93      | 3.33E-175 | 0.576  | 0.513 | 0.159 | 6.66E-172 | Macrophages_2 |
| Rorb.4    | 3.02E-174 | -1.555 | 0.310 | 0.549 | 6.03E-171 | Macrophages_2 |
| Prdx1     | 1.89E-169 | 0.867  | 0.547 | 0.229 | 3.77E-166 | Macrophages_2 |
| Galnt17.5 | 2.57E-169 | -1.496 | 0.409 | 0.594 | 5.14E-166 | Macrophages_2 |
| Gabra3.4  | 3.23E-169 | -1.682 | 0.376 | 0.566 | 6.45E-166 | Macrophages_2 |
| Anln.1    | 1.81E-168 | 0.649  | 0.539 | 0.287 | 3.63E-165 | Macrophages_2 |
| Pkib      | 1.20E-166 | 0.517  | 0.558 | 0.322 | 2.39E-163 | Macrophages_2 |
| Cachd1.3  | 7.16E-166 | -1.511 | 0.451 | 0.584 | 1.43E-162 | Macrophages_2 |
| C4b.1     | 1.41E-165 | -1.379 | 0.287 | 0.572 | 2.83E-162 | Macrophages_2 |
| Prkg1.4   | 1.85E-165 | -2.364 | 0.572 | 0.746 | 3.70E-162 | Macrophages_2 |
| Gm5150.3  | 7.10E-165 | 0.860  | 0.567 | 0.264 | 1.42E-161 | Macrophages_2 |
| Basp1.4   | 1.52E-164 | 0.592  | 0.723 | 0.449 | 3.04E-161 | Macrophages_2 |
| Aff2.3    | 2.89E-164 | -1.307 | 0.188 | 0.477 | 5.79E-161 | Macrophages_2 |
| Mms22l.1  | 4.44E-163 | 0.617  | 0.651 | 0.44  | 8.88E-160 | Macrophages_2 |
| Chn2.4    | 1.26E-162 | 0.602  | 0.747 | 0.502 | 2.52E-159 | Macrophages_2 |
| Nkain2.2  | 1.02E-161 | -0.661 | 0.092 | 0.352 | 2.05E-158 | Macrophages_2 |
| Fblim1    | 1.29E-161 | 0.645  | 0.602 | 0.344 | 2.57E-158 | Macrophages_2 |
| Celf4.3   | 1.40E-161 | 0.582  | 0.589 | 0.288 | 2.81E-158 | Macrophages_2 |
| Figl.3    | 2.42E-160 | -1.042 | 0.242 | 0.483 | 4.85E-157 | Macrophages_2 |
| Kitl.1    | 8.62E-160 | 0.812  | 0.848 | 0.695 | 1.72E-156 | Macrophages_2 |
| Mtmt10    | 2.19E-156 | 0.729  | 0.717 | 0.49  | 4.39E-153 | Macrophages_2 |
| Eln.4     | 2.22E-156 | -2.057 | 0.315 | 0.538 | 4.44E-153 | Macrophages_2 |
| Pla2g7.5  | 8.05E-156 | 0.677  | 0.627 | 0.301 | 1.61E-152 | Macrophages_2 |
| Brip1.1   | 1.15E-154 | 0.784  | 0.588 | 0.364 | 2.30E-151 | Macrophages_2 |
| Pcdh19.5  | 1.81E-152 | -1.601 | 0.386 | 0.565 | 3.62E-149 | Macrophages_2 |
| Ly6a.4    | 8.12E-152 | -1.252 | 0.010 | 0.391 | 1.62E-148 | Macrophages_2 |
| Gria3.3   | 3.79E-151 | -1.309 | 0.397 | 0.588 | 7.58E-148 | Macrophages_2 |
| Dpyd.2    | 4.85E-151 | -1.302 | 0.442 | 0.63  | 9.70E-148 | Macrophages_2 |

|            |           |        |       |       |           |               |
|------------|-----------|--------|-------|-------|-----------|---------------|
| Map1b.4    | 6.57E-151 | -0.879 | 0.100 | 0.365 | 1.31E-147 | Macrophages_2 |
| Sertad2.1  | 3.50E-148 | 0.826  | 0.690 | 0.496 | 6.99E-145 | Macrophages_2 |
| Sfrp4.4    | 3.86E-148 | -0.923 | 0.002 | 0.335 | 7.72E-145 | Macrophages_2 |
| Timp3.5    | 6.90E-147 | -1.350 | 0.201 | 0.487 | 1.38E-143 | Macrophages_2 |
| Kif4.1     | 1.05E-145 | 0.539  | 0.470 | 0.189 | 2.10E-142 | Macrophages_2 |
| Col4a2.4   | 1.12E-145 | -1.541 | 0.228 | 0.502 | 2.24E-142 | Macrophages_2 |
| Slc1a5.4   | 1.78E-145 | -2.066 | 0.274 | 0.523 | 3.55E-142 | Macrophages_2 |
| Actg1      | 4.39E-145 | 0.569  | 0.517 | 0.201 | 8.78E-142 | Macrophages_2 |
| Angpt1.3   | 2.95E-144 | -1.615 | 0.379 | 0.549 | 5.91E-141 | Macrophages_2 |
| Prc1.1     | 1.12E-143 | 0.641  | 0.493 | 0.2   | 2.24E-140 | Macrophages_2 |
| Ccser1.2   | 1.44E-143 | -0.905 | 0.345 | 0.533 | 2.88E-140 | Macrophages_2 |
| Pde11a.4   | 6.24E-143 | -1.219 | 0.267 | 0.443 | 1.25E-139 | Macrophages_2 |
| Pcdh9.3    | 1.37E-141 | -2.493 | 0.478 | 0.616 | 2.73E-138 | Macrophages_2 |
| Bmp6.4     | 4.40E-141 | -1.119 | 0.274 | 0.481 | 8.80E-138 | Macrophages_2 |
| Oxct1.2    | 9.90E-141 | 0.518  | 0.749 | 0.475 | 1.98E-137 | Macrophages_2 |
| Cd83.1     | 1.98E-140 | 0.656  | 0.510 | 0.2   | 3.96E-137 | Macrophages_2 |
| Robo1.4    | 2.19E-140 | -1.836 | 0.406 | 0.593 | 4.38E-137 | Macrophages_2 |
| Nusap1.1   | 2.53E-140 | 0.519  | 0.512 | 0.268 | 5.05E-137 | Macrophages_2 |
| Efcab11.1  | 1.01E-139 | 0.798  | 0.547 | 0.321 | 2.03E-136 | Macrophages_2 |
| Prickle1.2 | 3.52E-139 | -1.483 | 0.366 | 0.581 | 7.04E-136 | Macrophages_2 |
| Mmp19      | 4.90E-139 | 0.816  | 0.441 | 0.144 | 9.79E-136 | Macrophages_2 |
| Dhrs9      | 6.41E-139 | 0.600  | 0.516 | 0.251 | 1.28E-135 | Macrophages_2 |
| Snta1.1    | 4.32E-137 | -0.807 | 0.254 | 0.524 | 8.63E-134 | Macrophages_2 |
| Ror1.4     | 9.03E-137 | -1.605 | 0.485 | 0.632 | 1.81E-133 | Macrophages_2 |
| Ano3.4     | 9.11E-137 | -1.583 | 0.293 | 0.491 | 1.82E-133 | Macrophages_2 |
| Adam12.5   | 2.30E-136 | -1.964 | 0.357 | 0.559 | 4.61E-133 | Macrophages_2 |
| Coro2a.3   | 3.24E-136 | 0.585  | 0.567 | 0.267 | 6.48E-133 | Macrophages_2 |
| Xkr4.3     | 3.36E-136 | -1.310 | 0.317 | 0.499 | 6.72E-133 | Macrophages_2 |
| Bcl2l11    | 6.29E-136 | 0.546  | 0.541 | 0.308 | 1.26E-132 | Macrophages_2 |
| Errfi1.4   | 7.40E-136 | -1.667 | 0.323 | 0.568 | 1.48E-132 | Macrophages_2 |
| Igsf6.1    | 3.60E-135 | 0.592  | 0.561 | 0.245 | 7.20E-132 | Macrophages_2 |
| Mis18bp1.1 | 1.49E-134 | 0.759  | 0.530 | 0.269 | 2.97E-131 | Macrophages_2 |
| Malt1.2    | 2.93E-134 | 0.807  | 0.679 | 0.447 | 5.86E-131 | Macrophages_2 |
| Rgs6.3     | 3.49E-133 | -1.644 | 0.379 | 0.545 | 6.98E-130 | Macrophages_2 |
| Clic4.2    | 3.73E-133 | 0.637  | 0.759 | 0.524 | 7.47E-130 | Macrophages_2 |
| Itpr1.2    | 1.23E-132 | -0.816 | 0.382 | 0.648 | 2.46E-129 | Macrophages_2 |
| Lamp1.1    | 9.27E-132 | 0.547  | 0.588 | 0.325 | 1.85E-128 | Macrophages_2 |
| Igfbp6.4   | 1.59E-131 | -1.269 | 0.008 | 0.328 | 3.19E-128 | Macrophages_2 |
| Serpinf1.4 | 1.45E-130 | -1.199 | 0.020 | 0.361 | 2.91E-127 | Macrophages_2 |
| Arid5b.4   | 2.78E-129 | 0.764  | 0.856 | 0.671 | 5.56E-126 | Macrophages_2 |
| Mmp3.3     | 5.15E-128 | -0.918 | 0.052 | 0.335 | 1.03E-124 | Macrophages_2 |
| Stox2.3    | 1.98E-127 | -0.956 | 0.235 | 0.493 | 3.96E-124 | Macrophages_2 |
| Slfm2      | 1.26E-126 | 0.507  | 0.481 | 0.144 | 2.52E-123 | Macrophages_2 |
| Kif20b.1   | 3.20E-126 | 0.506  | 0.462 | 0.221 | 6.40E-123 | Macrophages_2 |
| Tcaf1.2    | 1.92E-124 | -1.107 | 0.264 | 0.472 | 3.83E-121 | Macrophages_2 |
| Ect2.1     | 2.84E-124 | 0.626  | 0.520 | 0.301 | 5.68E-121 | Macrophages_2 |
| Sel1l3     | 2.97E-124 | 0.543  | 0.549 | 0.36  | 5.94E-121 | Macrophages_2 |
| Ercc6      | 3.07E-124 | 0.538  | 0.650 | 0.456 | 6.14E-121 | Macrophages_2 |
| C3.4       | 8.40E-124 | -1.286 | 0.013 | 0.342 | 1.68E-120 | Macrophages_2 |
| Dok2.4     | 1.03E-122 | 0.508  | 0.558 | 0.232 | 2.06E-119 | Macrophages_2 |
| Mag1.2     | 7.93E-117 | -1.651 | 0.382 | 0.578 | 1.59E-113 | Macrophages_2 |
| Chrdl1.2   | 1.37E-116 | -0.915 | 0.227 | 0.433 | 2.75E-113 | Macrophages_2 |
| Jph1.2     | 4.02E-116 | -0.523 | 0.154 | 0.352 | 8.03E-113 | Macrophages_2 |
| Pola1.2    | 1.83E-115 | 0.878  | 0.785 | 0.626 | 3.65E-112 | Macrophages_2 |
| Atad2.1    | 1.37E-114 | 0.741  | 0.646 | 0.454 | 2.74E-111 | Macrophages_2 |
| Dlg2.3     | 1.50E-114 | -1.214 | 0.330 | 0.483 | 2.99E-111 | Macrophages_2 |
| Gpc3.4     | 1.09E-113 | -1.119 | 0.242 | 0.457 | 2.19E-110 | Macrophages_2 |
| Ism1.2     | 1.92E-112 | -0.637 | 0.073 | 0.348 | 3.84E-109 | Macrophages_2 |
| Plxnc1.5   | 2.63E-112 | 0.515  | 0.600 | 0.311 | 5.25E-109 | Macrophages_2 |
| Plk2       | 5.74E-109 | 0.652  | 0.465 | 0.168 | 1.15E-105 | Macrophages_2 |
| Sema5a.4   | 7.35E-108 | -0.719 | 0.183 | 0.397 | 1.47E-104 | Macrophages_2 |
| Syne1.2    | 1.69E-107 | 0.547  | 0.856 | 0.675 | 3.38E-104 | Macrophages_2 |



|              |           |        |       |       |           |               |
|--------------|-----------|--------|-------|-------|-----------|---------------|
| Cdh9.3       | 1.74E-105 | -1.010 | 0.321 | 0.49  | 3.47E-102 | Macrophages_2 |
| Pcolce.3     | 2.60E-105 | -0.773 | 0.026 | 0.354 | 5.20E-102 | Macrophages_2 |
| Aebp1.4      | 4.72E-105 | -1.272 | 0.033 | 0.352 | 9.45E-102 | Macrophages_2 |
| Col4a1.4     | 6.49E-105 | -1.889 | 0.385 | 0.548 | 1.30E-101 | Macrophages_2 |
| Dmd.4        | 3.92E-104 | -1.548 | 0.461 | 0.56  | 7.84E-101 | Macrophages_2 |
| Aspn.4       | 7.49E-104 | -1.370 | 0.258 | 0.432 | 1.50E-100 | Macrophages_2 |
| Igr4.2       | 8.73E-104 | -1.289 | 0.255 | 0.473 | 1.75E-100 | Macrophages_2 |
| Fos          | 1.72E-103 | 0.619  | 0.425 | 0.094 | 3.44E-100 | Macrophages_2 |
| Cenpf.1      | 8.10E-102 | 0.633  | 0.489 | 0.241 | 1.62E-98  | Macrophages_2 |
| Tank.4       | 1.55E-101 | 0.553  | 0.822 | 0.613 | 3.10E-98  | Macrophages_2 |
| Ksr2         | 2.97E-101 | 0.719  | 0.492 | 0.236 | 5.93E-98  | Macrophages_2 |
| Prss23.4     | 6.66E-100 | -0.836 | 0.004 | 0.28  | 1.33E-96  | Macrophages_2 |
| Pmepa1.2     | 1.62E-99  | -1.263 | 0.246 | 0.45  | 3.24E-96  | Macrophages_2 |
| Abca8b.4     | 3.82E-99  | -1.196 | 0.294 | 0.48  | 7.65E-96  | Macrophages_2 |
| Kcnt2.3      | 5.29E-99  | -1.490 | 0.505 | 0.611 | 1.06E-95  | Macrophages_2 |
| Racgap1.1    | 1.14E-98  | 0.509  | 0.381 | 0.117 | 2.27E-95  | Macrophages_2 |
| Slc2a13.3    | 1.21E-98  | -1.248 | 0.389 | 0.493 | 2.42E-95  | Macrophages_2 |
| Cd63         | 7.29E-98  | 0.650  | 0.430 | 0.133 | 1.46E-94  | Macrophages_2 |
| Gabre.4      | 7.43E-98  | -0.627 | 0.189 | 0.381 | 1.49E-94  | Macrophages_2 |
| Col6a1.4     | 9.73E-98  | -0.988 | 0.032 | 0.341 | 1.95E-94  | Macrophages_2 |
| Epha3.4      | 6.72E-97  | -1.390 | 0.301 | 0.453 | 1.34E-93  | Macrophages_2 |
| Nlgn1.3      | 1.03E-96  | -0.774 | 0.089 | 0.311 | 2.05E-93  | Macrophages_2 |
| Ppp1r9a.1    | 1.52E-96  | -0.941 | 0.594 | 0.705 | 3.04E-93  | Macrophages_2 |
| Nr1h4.3      | 2.97E-96  | -1.086 | 0.339 | 0.499 | 5.94E-93  | Macrophages_2 |
| Chst11.2     | 6.30E-94  | 1.247  | 0.663 | 0.543 | 1.26E-90  | Macrophages_2 |
| Large1.2     | 8.29E-94  | -0.958 | 0.828 | 0.854 | 1.66E-90  | Macrophages_2 |
| Car8.4       | 1.54E-93  | -0.966 | 0.201 | 0.381 | 3.08E-90  | Macrophages_2 |
| Foxp2.4      | 4.16E-93  | -0.900 | 0.098 | 0.323 | 8.33E-90  | Macrophages_2 |
| Irs1.3       | 6.02E-93  | -1.294 | 0.343 | 0.483 | 1.20E-89  | Macrophages_2 |
| Ntn4.4       | 4.35E-92  | -1.152 | 0.217 | 0.433 | 8.70E-89  | Macrophages_2 |
| Prex2.2      | 5.67E-89  | -1.187 | 0.375 | 0.518 | 1.13E-85  | Macrophages_2 |
| Ikzf2.1      | 7.51E-89  | -0.870 | 0.455 | 0.594 | 1.50E-85  | Macrophages_2 |
| Smoc2.3      | 6.89E-88  | -1.012 | 0.245 | 0.453 | 1.38E-84  | Macrophages_2 |
| Cd248.4      | 1.85E-85  | -0.893 | 0.009 | 0.285 | 3.70E-82  | Macrophages_2 |
| Anxa1.2      | 7.13E-84  | 0.700  | 0.746 | 0.559 | 1.43E-80  | Macrophages_2 |
| Meox2.3      | 9.48E-82  | -1.201 | 0.316 | 0.463 | 1.90E-78  | Macrophages_2 |
| Plac8.2      | 2.57E-81  | -0.554 | 0.125 | 0.39  | 5.14E-78  | Macrophages_2 |
| Plaur        | 5.39E-81  | 0.602  | 0.415 | 0.135 | 1.08E-77  | Macrophages_2 |
| Tln2.3       | 6.12E-81  | -1.208 | 0.307 | 0.489 | 1.22E-77  | Macrophages_2 |
| Gpc4.2       | 2.32E-80  | -0.689 | 0.155 | 0.363 | 4.65E-77  | Macrophages_2 |
| Il1r2.3      | 6.66E-80  | -0.585 | 0.067 | 0.297 | 1.33E-76  | Macrophages_2 |
| Pde1a.4      | 7.46E-80  | -1.296 | 0.385 | 0.51  | 1.49E-76  | Macrophages_2 |
| Csgalnact1.4 | 2.54E-79  | -1.137 | 0.469 | 0.574 | 5.07E-76  | Macrophages_2 |
| Fgf7.3       | 8.88E-79  | -0.804 | 0.229 | 0.398 | 1.78E-75  | Macrophages_2 |
| Vit.2        | 9.85E-79  | -0.545 | 0.007 | 0.272 | 1.97E-75  | Macrophages_2 |
| Sema3a.3     | 9.98E-79  | -0.693 | 0.185 | 0.389 | 2.00E-75  | Macrophages_2 |
| Vcl.4        | 6.37E-78  | 0.530  | 0.748 | 0.542 | 1.27E-74  | Macrophages_2 |
| Slit2.2      | 4.94E-76  | -0.889 | 0.181 | 0.372 | 9.89E-73  | Macrophages_2 |
| Col8a1.5     | 3.28E-75  | -1.006 | 0.235 | 0.387 | 6.56E-72  | Macrophages_2 |
| Serpinh1.3   | 4.80E-75  | -0.774 | 0.017 | 0.303 | 9.59E-72  | Macrophages_2 |
| Serpine2.2   | 1.27E-74  | -0.566 | 0.034 | 0.263 | 2.54E-71  | Macrophages_2 |
| Vegfc.2      | 1.75E-72  | -0.662 | 0.254 | 0.383 | 3.49E-69  | Macrophages_2 |
| Chsy3.2      | 2.47E-72  | -0.588 | 0.357 | 0.515 | 4.95E-69  | Macrophages_2 |
| Negr1.4      | 7.96E-71  | -1.159 | 0.696 | 0.768 | 1.59E-67  | Macrophages_2 |
| Fmo1.2       | 8.43E-69  | -0.821 | 0.242 | 0.4   | 1.69E-65  | Macrophages_2 |
| Ptprk.3      | 9.77E-68  | -1.098 | 0.269 | 0.448 | 1.95E-64  | Macrophages_2 |
| Fabp4.4      | 1.76E-67  | -1.519 | 0.340 | 0.496 | 3.51E-64  | Macrophages_2 |
| Hmcn2.3      | 1.97E-67  | -1.289 | 0.269 | 0.432 | 3.94E-64  | Macrophages_2 |
| Pde7a.3      | 1.63E-65  | -1.059 | 0.666 | 0.713 | 3.25E-62  | Macrophages_2 |
| Lvm.3        | 2.20E-62  | -1.614 | 0.485 | 0.556 | 4.40E-59  | Macrophages_2 |
| Sema6a.1     | 4.48E-61  | -0.773 | 0.481 | 0.576 | 8.96E-58  | Macrophages_2 |
| Mycbp2.4     | 8.13E-61  | -1.194 | 0.869 | 0.85  | 1.63E-57  | Macrophages_2 |

|            |          |        |       |       |          |               |
|------------|----------|--------|-------|-------|----------|---------------|
| Colec12.2  | 4.53E-60 | -0.790 | 0.575 | 0.666 | 9.06E-57 | Macrophages_2 |
| Eya2.2     | 6.02E-59 | -0.758 | 0.326 | 0.443 | 1.20E-55 | Macrophages_2 |
| Acyp2.2    | 8.40E-59 | -1.335 | 0.632 | 0.674 | 1.68E-55 | Macrophages_2 |
| Zfp423.2   | 1.13E-58 | -1.262 | 0.471 | 0.501 | 2.26E-55 | Macrophages_2 |
| Bgn.4      | 4.94E-58 | -0.988 | 0.002 | 0.27  | 9.88E-55 | Macrophages_2 |
| Mical3.2   | 2.42E-57 | -1.167 | 0.351 | 0.49  | 4.84E-54 | Macrophages_2 |
| Fam78b.1   | 8.11E-57 | 0.583  | 0.625 | 0.515 | 1.62E-53 | Macrophages_2 |
| Col15a1.4  | 6.00E-55 | -1.056 | 0.274 | 0.415 | 1.20E-51 | Macrophages_2 |
| Boc.2      | 1.45E-54 | -1.011 | 0.407 | 0.488 | 2.89E-51 | Macrophages_2 |
| Igfbp7.4   | 5.61E-53 | -1.224 | 0.228 | 0.394 | 1.12E-49 | Macrophages_2 |
| Nipa2.3    | 6.20E-53 | -0.807 | 0.141 | 0.325 | 1.24E-49 | Macrophages_2 |
| Gria4.4    | 3.01E-52 | -1.239 | 0.283 | 0.396 | 6.02E-49 | Macrophages_2 |
| Tmem267    | 1.27E-50 | 0.538  | 0.388 | 0.213 | 2.54E-47 | Macrophages_2 |
| Fhit.3     | 5.38E-50 | -0.964 | 0.774 | 0.828 | 1.08E-46 | Macrophages_2 |
| Mgll.3     | 9.06E-50 | -1.392 | 0.382 | 0.459 | 1.81E-46 | Macrophages_2 |
| Gucy1a2.3  | 3.55E-49 | -0.806 | 0.281 | 0.415 | 7.10E-46 | Macrophages_2 |
| Sult1e1.3  | 2.28E-48 | -0.959 | 0.153 | 0.324 | 4.55E-45 | Macrophages_2 |
| Apod.4     | 2.58E-48 | -0.715 | 0.092 | 0.3   | 5.17E-45 | Macrophages_2 |
| Prickle2.2 | 5.49E-48 | -0.994 | 0.363 | 0.479 | 1.10E-44 | Macrophages_2 |
| Aldh1a3.4  | 5.81E-48 | -0.825 | 0.195 | 0.345 | 1.16E-44 | Macrophages_2 |
| Prdm16.2   | 1.18E-47 | -0.636 | 0.251 | 0.361 | 2.37E-44 | Macrophages_2 |
| Mageb18.1  | 2.67E-47 | -1.664 | 0.308 | 0.141 | 5.33E-44 | Macrophages_2 |
| C1qtnf7.4  | 1.02E-46 | -1.355 | 0.385 | 0.485 | 2.05E-43 | Macrophages_2 |
| Ppfia2.3   | 3.12E-46 | -0.549 | 0.131 | 0.271 | 6.24E-43 | Macrophages_2 |
| Msrb3.3    | 3.16E-46 | -1.405 | 0.418 | 0.513 | 6.31E-43 | Macrophages_2 |
| Tshr.3     | 4.51E-46 | -1.703 | 0.355 | 0.173 | 9.02E-43 | Macrophages_2 |
| C7.3       | 7.61E-46 | -2.458 | 0.377 | 0.43  | 1.52E-42 | Macrophages_2 |
| Pdzrn3.4   | 1.18E-45 | -1.730 | 0.352 | 0.461 | 2.35E-42 | Macrophages_2 |
| Fmo2.5     | 3.72E-45 | -1.197 | 0.157 | 0.332 | 7.44E-42 | Macrophages_2 |
| Kcnq1.2    | 9.28E-45 | 0.583  | 0.643 | 0.539 | 1.86E-41 | Macrophages_2 |
| Cdh13.3    | 1.65E-44 | -1.311 | 0.415 | 0.51  | 3.31E-41 | Macrophages_2 |
| Nrep.3     | 2.31E-44 | -0.718 | 0.254 | 0.366 | 4.61E-41 | Macrophages_2 |
| Sox6.3     | 9.91E-43 | -0.735 | 0.372 | 0.187 | 1.98E-39 | Macrophages_2 |
| Smoc1.2    | 1.43E-42 | -1.129 | 0.327 | 0.164 | 2.87E-39 | Macrophages_2 |
| Pck1.1     | 1.37E-41 | -0.557 | 0.274 | 0.137 | 2.74E-38 | Macrophages_2 |
| Plcx3.4    | 3.34E-40 | -1.332 | 0.284 | 0.379 | 6.69E-37 | Macrophages_2 |
| Adamts6    | 9.10E-40 | -0.620 | 0.487 | 0.582 | 1.82E-36 | Macrophages_2 |
| Hpgd.1     | 9.54E-40 | -0.720 | 0.489 | 0.57  | 1.91E-36 | Macrophages_2 |
| Slc1a3.3   | 2.08E-39 | -0.956 | 0.198 | 0.274 | 4.17E-36 | Macrophages_2 |
| Tnik.2     | 2.68E-38 | -0.605 | 0.316 | 0.417 | 5.35E-35 | Macrophages_2 |
| Ppp2r2b.3  | 5.71E-38 | -1.379 | 0.324 | 0.451 | 1.14E-34 | Macrophages_2 |
| Trabd2b.3  | 3.78E-37 | -0.911 | 0.268 | 0.364 | 7.55E-34 | Macrophages_2 |
| Plpp1.3    | 3.96E-37 | -0.663 | 0.406 | 0.515 | 7.91E-34 | Macrophages_2 |
| Kcnq5.3    | 1.04E-36 | -1.050 | 0.412 | 0.492 | 2.07E-33 | Macrophages_2 |
| Cenpp.2    | 1.32E-36 | 0.644  | 0.598 | 0.498 | 2.65E-33 | Macrophages_2 |
| Enah.3     | 1.85E-34 | -0.618 | 0.220 | 0.33  | 3.71E-31 | Macrophages_2 |
| Tmtc2.3    | 1.29E-33 | -0.669 | 0.478 | 0.584 | 2.59E-30 | Macrophages_2 |
| Npr3.3     | 2.87E-33 | -2.337 | 0.333 | 0.177 | 5.73E-30 | Macrophages_2 |
| Mme.4      | 2.93E-33 | -0.762 | 0.294 | 0.39  | 5.87E-30 | Macrophages_2 |
| Txlng.3    | 3.56E-33 | -0.920 | 0.616 | 0.643 | 7.12E-30 | Macrophages_2 |
| Dact2.4    | 1.44E-32 | -0.623 | 0.144 | 0.272 | 2.88E-29 | Macrophages_2 |
| Pde10a.3   | 5.13E-32 | -0.955 | 0.330 | 0.411 | 1.03E-28 | Macrophages_2 |
| Cfh.4      | 1.46E-31 | -0.829 | 0.722 | 0.524 | 2.92E-28 | Macrophages_2 |
| Pde4d.3    | 2.18E-31 | -0.691 | 0.836 | 0.609 | 4.35E-28 | Macrophages_2 |
| Adamts13.3 | 3.95E-30 | -1.014 | 0.382 | 0.451 | 7.90E-27 | Macrophages_2 |
| Rnf24.2    | 5.06E-30 | -0.646 | 0.223 | 0.335 | 1.01E-26 | Macrophages_2 |
| Cp         | 1.63E-28 | -0.664 | 0.516 | 0.553 | 3.26E-25 | Macrophages_2 |
| Pnpla3.1   | 2.28E-28 | -1.299 | 0.276 | 0.153 | 4.56E-25 | Macrophages_2 |
| Ezh2.1     | 4.62E-28 | 0.521  | 0.537 | 0.458 | 9.25E-25 | Macrophages_2 |
| Cadps2.3   | 9.77E-28 | -0.601 | 0.222 | 0.358 | 1.95E-24 | Macrophages_2 |
| Ugdh.3     | 1.49E-27 | -1.075 | 0.409 | 0.471 | 2.98E-24 | Macrophages_2 |
| Prkar2b.4  | 5.52E-27 | -2.190 | 0.234 | 0.287 | 1.10E-23 | Macrophages_2 |

|              |           |        |       |       |             |               |
|--------------|-----------|--------|-------|-------|-------------|---------------|
| Dnm3.3       | 4.73E-26  | -0.581 | 0.586 | 0.643 | 9.46E-23    | Macrophages_2 |
| Snhg11.3     | 1.51E-25  | -0.775 | 0.212 | 0.324 | 3.01E-22    | Macrophages_2 |
| Plekhg5.4    | 9.63E-25  | -0.660 | 0.606 | 0.452 | 1.93E-21    | Macrophages_2 |
| Lsamp.3      | 1.37E-23  | -0.594 | 0.175 | 0.311 | 2.73E-20    | Macrophages_2 |
| Pde7b.5      | 1.46E-23  | -0.820 | 0.755 | 0.793 | 2.92E-20    | Macrophages_2 |
| Slc25a21.4   | 4.44E-23  | -0.654 | 0.193 | 0.288 | 8.89E-20    | Macrophages_2 |
| Ntrk2.3      | 4.89E-23  | -1.029 | 0.418 | 0.422 | 9.79E-20    | Macrophages_2 |
| Rgs7bp.2     | 5.13E-23  | -0.610 | 0.288 | 0.42  | 1.03E-19    | Macrophages_2 |
| Lyve1.5      | 7.27E-23  | -0.604 | 0.245 | 0.269 | 1.45E-19    | Macrophages_2 |
| Sgip1.4      | 9.43E-23  | -0.875 | 0.442 | 0.501 | 1.89E-19    | Macrophages_2 |
| Prr16.3      | 1.07E-22  | -1.921 | 0.376 | 0.396 | 2.15E-19    | Macrophages_2 |
| Ccdc3.2      | 1.21E-22  | -0.762 | 0.253 | 0.352 | 2.41E-19    | Macrophages_2 |
| Ldb2.4       | 1.60E-22  | -1.176 | 0.441 | 0.474 | 3.19E-19    | Macrophages_2 |
| Smpd3.3      | 3.74E-22  | -0.687 | 0.679 | 0.526 | 7.49E-19    | Macrophages_2 |
| Nhs.2        | 1.01E-21  | -0.590 | 0.156 | 0.286 | 2.02E-18    | Macrophages_2 |
| Sned1.2      | 1.01E-21  | -0.868 | 0.351 | 0.447 | 2.03E-18    | Macrophages_2 |
| Gpm6b.3      | 1.33E-21  | -0.881 | 0.265 | 0.371 | 2.66E-18    | Macrophages_2 |
| Mctp2.4      | 1.65E-21  | -0.569 | 0.515 | 0.354 | 3.29E-18    | Macrophages_2 |
| Adamts16.3   | 2.16E-20  | -1.124 | 0.296 | 0.376 | 4.32E-17    | Macrophages_2 |
| Optn.4       | 4.53E-20  | -0.573 | 0.353 | 0.265 | 9.06E-17    | Macrophages_2 |
| Dkk2.4       | 8.06E-20  | -0.886 | 0.294 | 0.372 | 1.61E-16    | Macrophages_2 |
| Gas6.5       | 5.16E-18  | -0.664 | 0.429 | 0.457 | 1.03E-14    | Macrophages_2 |
| Fam13a.3     | 9.15E-18  | -1.085 | 0.473 | 0.354 | 1.83E-14    | Macrophages_2 |
| Tmem135.4    | 9.45E-18  | -0.787 | 0.774 | 0.573 | 1.89E-14    | Macrophages_2 |
| Sorbs1.4     | 1.08E-17  | -2.795 | 0.407 | 0.281 | 2.15E-14    | Macrophages_2 |
| St6galnac5.2 | 1.38E-17  | -0.515 | 0.342 | 0.284 | 2.77E-14    | Macrophages_2 |
| Rgs7.4       | 7.76E-17  | -0.959 | 0.358 | 0.374 | 1.55E-13    | Macrophages_2 |
| Ddx60.5      | 2.15E-16  | -0.782 | 0.643 | 0.662 | 4.30E-13    | Macrophages_2 |
| Slc24a3.3    | 3.94E-15  | -1.425 | 0.576 | 0.598 | 7.88E-12    | Macrophages_2 |
| Col4a5.4     | 2.60E-14  | -0.795 | 0.475 | 0.482 | 5.21E-11    | Macrophages_2 |
| F13a1.4      | 3.97E-14  | -1.180 | 0.714 | 0.536 | 7.94E-11    | Macrophages_2 |
| Skap1.3      | 8.25E-14  | -0.501 | 0.203 | 0.26  | 1.65E-10    | Macrophages_2 |
| Cd163.5      | 1.23E-13  | -0.904 | 0.569 | 0.418 | 2.45E-10    | Macrophages_2 |
| Ranbp17.3    | 3.10E-13  | -0.539 | 0.270 | 0.302 | 6.19E-10    | Macrophages_2 |
| Tmem45b.3    | 7.34E-13  | -1.597 | 0.305 | 0.19  | 1.47E-09    | Macrophages_2 |
| Fam126b.5    | 1.37E-12  | -0.997 | 0.399 | 0.332 | 2.75E-09    | Macrophages_2 |
| Fgf10.4      | 1.66E-11  | -1.212 | 0.329 | 0.371 | 3.32E-08    | Macrophages_2 |
| Tsc22d3.5    | 2.09E-11  | -0.931 | 0.539 | 0.52  | 4.17E-08    | Macrophages_2 |
| Nrg4.3       | 6.63E-11  | -1.198 | 0.295 | 0.18  | 1.33E-07    | Macrophages_2 |
| Bckdhb.4     | 8.12E-11  | -1.314 | 0.537 | 0.543 | 1.62E-07    | Macrophages_2 |
| Ly6e.2       | 1.05E-10  | -0.561 | 0.171 | 0.301 | 2.10E-07    | Macrophages_2 |
| Adipor2.4    | 8.96E-10  | -1.059 | 0.472 | 0.366 | 1.79E-06    | Macrophages_2 |
| Dcstamp      | 1.16E-09  | 0.730  | 0.312 | 0.082 | 2.32E-06    | Macrophages_2 |
| Inpp4b.3     | 1.18E-09  | -0.505 | 0.566 | 0.499 | 2.35E-06    | Macrophages_2 |
| Tbc1d4.4     | 2.74E-09  | -0.647 | 0.776 | 0.76  | 5.49E-06    | Macrophages_2 |
| Gm42906.1    | 4.60E-09  | -1.650 | 0.284 | 0.17  | 9.20E-06    | Macrophages_2 |
| Peg3.3       | 5.57E-09  | -0.731 | 0.278 | 0.252 | 1.11E-05    | Macrophages_2 |
| Nnat.3       | 6.04E-09  | -1.429 | 0.312 | 0.195 | 1.21E-05    | Macrophages_2 |
| Lpgat1.4     | 1.91E-08  | -1.549 | 0.407 | 0.335 | 3.82E-05    | Macrophages_2 |
| Cidec.2      | 5.48E-08  | -1.810 | 0.272 | 0.167 | 0.000109541 | Macrophages_2 |
| Galnt18.2    | 8.57E-08  | -0.554 | 0.294 | 0.33  | 0.000171305 | Macrophages_2 |
| Fry.5        | 1.14E-07  | -1.112 | 0.661 | 0.473 | 0.000228323 | Macrophages_2 |
| Enpp2.4      | 1.58E-07  | -1.439 | 0.296 | 0.348 | 0.000315649 | Macrophages_2 |
| Hacd2.5      | 2.13E-07  | -1.448 | 0.302 | 0.288 | 0.000426275 | Macrophages_2 |
| Dtna.2       | 1.71E-06  | -0.616 | 0.302 | 0.362 | 0.003415136 | Macrophages_2 |
| Cat.4        | 1.71E-06  | -0.639 | 0.291 | 0.262 | 0.00342172  | Macrophages_2 |
| Kcnc2.3      | 4.59E-06  | -0.969 | 0.216 | 0.313 | 0.009176101 | Macrophages_2 |
| Ngf.4        | 1.02E-05  | -0.617 | 0.303 | 0.311 | 0.02039126  | Macrophages_2 |
| Grb14.3      | 4.64E-05  | -0.949 | 0.333 | 0.309 | 0.092711847 | Macrophages_2 |
| Dram1.4      | 0.0001405 | -0.681 | 0.289 | 0.248 | 0.281098377 | Macrophages_2 |
| Eya4.3       | 0.0002139 | -0.779 | 0.594 | 0.573 | 0.427747296 | Macrophages_2 |
| Csmd1.3      | 0.0002412 | -1.210 | 0.263 | 0.302 | 0.482421243 | Macrophages_2 |

|              |           |        |       |       |           |               |
|--------------|-----------|--------|-------|-------|-----------|---------------|
| Ctnna3.3     | 0.0005217 | -0.678 | 0.283 | 0.254 | 1         | Macrophages_2 |
| Cobll1.3     | 0.0008165 | -0.993 | 0.436 | 0.437 | 1         | Macrophages_2 |
| Shroom3.2    | 0.0011462 | -0.636 | 0.238 | 0.31  | 1         | Macrophages_2 |
| Sik2.4       | 0.0027559 | -1.041 | 0.764 | 0.603 | 1         | Macrophages_2 |
| Gm4951.1     | 0.0041581 | -0.545 | 0.553 | 0.549 | 1         | Macrophages_2 |
| Mecom.2      | 0.005002  | -0.517 | 0.431 | 0.433 | 1         | Macrophages_2 |
| Tox.4        | 0.005563  | -0.730 | 0.295 | 0.336 | 1         | Macrophages_2 |
| MacroD2.2    | 0.0061275 | -1.114 | 0.551 | 0.514 | 1         | Macrophages_2 |
| MyI1.3       | 0.0065343 | -0.951 | 0.289 | 0.184 | 1         | Macrophages_2 |
| Itk          | 0         | 2.974  | 0.905 | 0.093 | 0         | NK cells      |
| Clnk         | 0         | 2.338  | 0.825 | 0.043 | 0         | NK cells      |
| Il23r        | 0         | 1.989  | 0.788 | 0.056 | 0         | NK cells      |
| Cd6          | 0         | 1.507  | 0.758 | 0.005 | 0         | NK cells      |
| Olfr1259     | 0         | 1.306  | 0.593 | 0.006 | 0         | NK cells      |
| Blk          | 0         | 1.261  | 0.805 | 0.095 | 0         | NK cells      |
| Ly6c2        | 0         | 1.233  | 0.744 | 0.027 | 0         | NK cells      |
| Klrc2        | 0         | 1.175  | 0.721 | 0.021 | 0         | NK cells      |
| Cdh10        | 0         | 0.937  | 0.747 | 0.05  | 0         | NK cells      |
| Klrc1        | 0         | 0.897  | 0.546 | 0     | 0         | NK cells      |
| Mmp25        | 0         | 0.813  | 0.808 | 0.017 | 0         | NK cells      |
| Pcsk1        | 0         | 0.797  | 0.518 | 0.001 | 0         | NK cells      |
| Prf1         | 0         | 0.773  | 0.638 | 0.007 | 0         | NK cells      |
| Ablim3       | 0         | 0.662  | 0.788 | 0.091 | 0         | NK cells      |
| Olfr60       | 0         | 0.582  | 0.755 | 0.049 | 0         | NK cells      |
| Fstl4        | 0         | 0.578  | 0.730 | 0.009 | 0         | NK cells      |
| Npnt         | 0         | 0.570  | 0.554 | 0.004 | 0         | NK cells      |
| Fasl         | 0         | 0.538  | 0.604 | 0.001 | 0         | NK cells      |
| Ikzf3        | 7.17E-305 | 2.864  | 0.816 | 0.084 | 1.43E-301 | NK cells      |
| Sid1t1       | 1.70E-296 | 1.540  | 0.763 | 0.099 | 3.41E-293 | NK cells      |
| Skap1.4      | 6.95E-287 | 4.013  | 0.930 | 0.234 | 1.39E-283 | NK cells      |
| Klrb1f       | 6.30E-278 | 0.814  | 0.599 | 0.033 | 1.26E-274 | NK cells      |
| Stat4        | 1.18E-245 | 2.904  | 0.908 | 0.206 | 2.35E-242 | NK cells      |
| Klra8        | 9.19E-242 | 1.598  | 0.479 | 0.039 | 1.84E-238 | NK cells      |
| St6galnac3.1 | 1.61E-238 | 3.593  | 0.914 | 0.279 | 3.22E-235 | NK cells      |
| Gimap3       | 3.43E-232 | 1.849  | 0.635 | 0.033 | 6.86E-229 | NK cells      |
| Bcl11b       | 2.14E-227 | 1.957  | 0.643 | 0.035 | 4.29E-224 | NK cells      |
| Rnf43        | 1.23E-219 | 1.271  | 0.688 | 0.056 | 2.47E-216 | NK cells      |
| Gimap8       | 3.65E-217 | 2.178  | 0.755 | 0.116 | 7.29E-214 | NK cells      |
| Btla         | 2.52E-214 | 1.166  | 0.719 | 0.106 | 5.03E-211 | NK cells      |
| Ccl4         | 1.61E-200 | 1.231  | 0.755 | 0.117 | 3.23E-197 | NK cells      |
| Klri2        | 1.43E-193 | 0.681  | 0.641 | 0.016 | 2.86E-190 | NK cells      |
| Samsn1.3     | 1.91E-192 | 2.260  | 0.900 | 0.229 | 3.82E-189 | NK cells      |
| Txk          | 4.77E-192 | 1.431  | 0.741 | 0.112 | 9.55E-189 | NK cells      |
| Arap2.4      | 2.21E-183 | 1.964  | 0.880 | 0.238 | 4.43E-180 | NK cells      |
| Camk4        | 5.77E-172 | 2.782  | 0.813 | 0.245 | 1.15E-168 | NK cells      |
| Mreg         | 6.00E-168 | 0.518  | 0.482 | 0.047 | 1.20E-164 | NK cells      |
| Il18r1       | 2.17E-167 | 2.677  | 0.850 | 0.233 | 4.35E-164 | NK cells      |
| Gata3        | 3.66E-167 | 2.211  | 0.613 | 0.055 | 7.32E-164 | NK cells      |
| Tespa1       | 3.12E-161 | 1.867  | 0.696 | 0.071 | 6.25E-158 | NK cells      |
| Grap2        | 3.87E-156 | 2.765  | 0.791 | 0.143 | 7.73E-153 | NK cells      |
| Tox.5        | 1.34E-151 | 3.543  | 0.836 | 0.317 | 2.69E-148 | NK cells      |
| Klrk1        | 1.94E-144 | 1.763  | 0.727 | 0.088 | 3.88E-141 | NK cells      |
| Ets1         | 2.78E-136 | 2.484  | 0.836 | 0.32  | 5.57E-133 | NK cells      |
| Cd163l1      | 9.50E-135 | 2.284  | 0.808 | 0.36  | 1.90E-131 | NK cells      |
| Kit          | 6.27E-134 | 0.679  | 0.582 | 0.048 | 1.25E-130 | NK cells      |
| Gpr183       | 9.06E-133 | 0.937  | 0.799 | 0.224 | 1.81E-129 | NK cells      |
| Inpp4b.4     | 2.21E-126 | 3.830  | 0.900 | 0.499 | 4.43E-123 | NK cells      |
| Unc5cl       | 2.71E-125 | 0.545  | 0.507 | 0.013 | 5.42E-122 | NK cells      |
| Tnik.3       | 6.91E-125 | 2.102  | 0.855 | 0.391 | 1.38E-121 | NK cells      |
| Nr4a3        | 8.42E-124 | 0.625  | 0.602 | 0.059 | 1.68E-120 | NK cells      |
| Gramd1b.4    | 2.77E-121 | 2.046  | 0.928 | 0.432 | 5.54E-118 | NK cells      |
| Strip2       | 1.02E-116 | 1.026  | 0.808 | 0.175 | 2.05E-113 | NK cells      |

|            |           |        |       |       |           |          |
|------------|-----------|--------|-------|-------|-----------|----------|
| Mageb18.2  | 8.34E-107 | -1.565 | 0.682 | 0.152 | 1.67E-103 | NK cells |
| Gimap7     | 2.39E-106 | 0.545  | 0.253 | 0.039 | 4.78E-103 | NK cells |
| Il7r.5     | 3.19E-104 | 2.188  | 0.774 | 0.274 | 6.38E-101 | NK cells |
| Tnfrsf9    | 2.12E-103 | 0.623  | 0.568 | 0.09  | 4.25E-100 | NK cells |
| Gimap4     | 1.31E-98  | 1.841  | 0.582 | 0.074 | 2.62E-95  | NK cells |
| Ripor2.3   | 5.22E-96  | 2.629  | 0.802 | 0.39  | 1.04E-92  | NK cells |
| Epsti1.5   | 7.04E-92  | 2.572  | 0.903 | 0.472 | 1.41E-88  | NK cells |
| H2-Q7      | 1.00E-87  | 1.489  | 0.699 | 0.141 | 2.01E-84  | NK cells |
| Itga4.5    | 7.72E-86  | 2.053  | 0.847 | 0.405 | 1.54E-82  | NK cells |
| Trhde.3    | 2.82E-85  | -0.687 | 0.719 | 0.198 | 5.64E-82  | NK cells |
| Ncr1       | 3.40E-84  | 1.471  | 0.526 | 0.09  | 6.80E-81  | NK cells |
| Ccr2.5     | 1.15E-83  | 1.305  | 0.805 | 0.248 | 2.29E-80  | NK cells |
| Fgf14.1    | 1.20E-83  | -0.724 | 0.526 | 0.126 | 2.40E-80  | NK cells |
| Runx2.1    | 7.25E-83  | 1.709  | 0.886 | 0.578 | 1.45E-79  | NK cells |
| Tmem45b.4  | 2.42E-82  | -1.437 | 0.733 | 0.194 | 4.83E-79  | NK cells |
| Atp8b4.6   | 8.61E-82  | 1.456  | 0.889 | 0.372 | 1.72E-78  | NK cells |
| Bcl2.3     | 1.47E-81  | 2.172  | 0.930 | 0.617 | 2.95E-78  | NK cells |
| Cd247      | 5.33E-80  | 2.422  | 0.694 | 0.199 | 1.07E-76  | NK cells |
| Pag1.4     | 1.43E-79  | 1.497  | 0.844 | 0.429 | 2.85E-76  | NK cells |
| Sox6.4     | 4.48E-78  | -0.617 | 0.685 | 0.202 | 8.95E-75  | NK cells |
| Csmd1.4    | 7.55E-78  | -0.681 | 0.752 | 0.284 | 1.51E-74  | NK cells |
| Chst11.3   | 8.72E-77  | 1.282  | 0.872 | 0.553 | 1.74E-73  | NK cells |
| Lmnb1.1    | 6.24E-75  | 0.578  | 0.822 | 0.343 | 1.25E-71  | NK cells |
| Fmo2.6     | 5.13E-73  | -0.794 | 0.777 | 0.294 | 1.03E-69  | NK cells |
| Cotl1.6    | 9.10E-71  | 0.978  | 0.825 | 0.309 | 1.82E-67  | NK cells |
| Plin1.1    | 1.32E-70  | -0.934 | 0.638 | 0.168 | 2.64E-67  | NK cells |
| Emb.4      | 4.38E-70  | 1.496  | 0.825 | 0.423 | 8.77E-67  | NK cells |
| Fgf13.6    | 1.07E-69  | 0.880  | 0.819 | 0.415 | 2.13E-66  | NK cells |
| Lck        | 3.09E-69  | 1.392  | 0.557 | 0.063 | 6.19E-66  | NK cells |
| Prkcq      | 1.10E-68  | 1.943  | 0.669 | 0.232 | 2.19E-65  | NK cells |
| Jazf1.4    | 2.40E-68  | 1.129  | 0.864 | 0.504 | 4.80E-65  | NK cells |
| Atp1a2.1   | 2.88E-68  | -0.879 | 0.641 | 0.169 | 5.76E-65  | NK cells |
| Chd7.4     | 1.35E-66  | 0.918  | 0.858 | 0.38  | 2.70E-63  | NK cells |
| Rgs7.5     | 6.10E-66  | -0.920 | 0.033 | 0.38  | 1.22E-62  | NK cells |
| Trac       | 6.52E-65  | 0.746  | 0.279 | 0.017 | 1.30E-61  | NK cells |
| Gria4.5    | 3.33E-64  | -0.685 | 0.791 | 0.369 | 6.67E-61  | NK cells |
| Cd84.6     | 3.31E-63  | 0.907  | 0.916 | 0.457 | 6.63E-60  | NK cells |
| Osbp13.3   | 6.39E-63  | 1.802  | 0.788 | 0.542 | 1.28E-59  | NK cells |
| Nnat.4     | 6.17E-62  | -1.238 | 0.660 | 0.201 | 1.23E-58  | NK cells |
| Gnai1.3    | 9.37E-62  | -0.792 | 0.652 | 0.182 | 1.87E-58  | NK cells |
| Cd4        | 3.63E-61  | 0.654  | 0.273 | 0.071 | 7.26E-58  | NK cells |
| Rab27b     | 5.50E-61  | 0.609  | 0.568 | 0.133 | 1.10E-57  | NK cells |
| Sult1e1.4  | 1.54E-60  | -0.638 | 0.786 | 0.286 | 3.08E-57  | NK cells |
| Plek.1     | 8.47E-59  | 0.924  | 0.850 | 0.424 | 1.69E-55  | NK cells |
| Cntn1      | 1.39E-58  | 1.381  | 0.549 | 0.124 | 2.78E-55  | NK cells |
| Ezh2.2     | 1.74E-58  | 0.827  | 0.847 | 0.46  | 3.49E-55  | NK cells |
| Lpin1.3    | 1.75E-58  | -0.619 | 0.209 | 0.39  | 3.50E-55  | NK cells |
| Dnah8      | 8.18E-58  | 0.798  | 0.630 | 0.181 | 1.64E-54  | NK cells |
| Il2rb      | 1.49E-57  | 1.726  | 0.465 | 0.002 | 2.99E-54  | NK cells |
| Pitpnc1.6  | 5.38E-57  | 0.951  | 0.936 | 0.717 | 1.08E-53  | NK cells |
| Fcer1g.4   | 6.08E-57  | 0.621  | 0.769 | 0.246 | 1.22E-53  | NK cells |
| Nr1h4.4    | 9.15E-57  | -0.991 | 0.081 | 0.486 | 1.83E-53  | NK cells |
| Insyn2b.6  | 1.56E-55  | 0.745  | 0.877 | 0.414 | 3.11E-52  | NK cells |
| Aebp1.5    | 4.53E-55  | -0.947 | 0.234 | 0.307 | 9.06E-52  | NK cells |
| Aoah.5     | 5.16E-54  | 0.544  | 0.855 | 0.459 | 1.03E-50  | NK cells |
| Mmp12.4    | 1.79E-53  | -0.514 | 0.618 | 0.202 | 3.57E-50  | NK cells |
| Ighm.3     | 4.92E-53  | 0.595  | 0.738 | 0.221 | 9.84E-50  | NK cells |
| Cd3g       | 2.74E-52  | 0.661  | 0.320 | 0     | 5.47E-49  | NK cells |
| Mcm6.1     | 6.99E-52  | 0.663  | 0.655 | 0.207 | 1.40E-48  | NK cells |
| Cd226.5    | 7.29E-52  | 1.962  | 0.702 | 0.24  | 1.46E-48  | NK cells |
| Slc22a23.2 | 1.40E-51  | 0.509  | 0.794 | 0.365 | 2.80E-48  | NK cells |
| MacroD2.3  | 1.53E-50  | -1.245 | 0.234 | 0.527 | 3.07E-47  | NK cells |

|            |          |        |       |       |          |          |
|------------|----------|--------|-------|-------|----------|----------|
| Cd5        | 2.71E-50 | 0.984  | 0.499 | 0.063 | 5.43E-47 | NK cells |
| Mpped2     | 1.58E-49 | 0.604  | 0.529 | 0.117 | 3.16E-46 | NK cells |
| Mctp2.5    | 1.83E-49 | 0.986  | 0.738 | 0.368 | 3.66E-46 | NK cells |
| Slc1a3.4   | 2.17E-49 | -0.777 | 0.702 | 0.252 | 4.34E-46 | NK cells |
| Kcnc2.4    | 6.17E-49 | -0.532 | 0.735 | 0.288 | 1.23E-45 | NK cells |
| Plcx3.5    | 5.97E-48 | -1.012 | 0.786 | 0.354 | 1.19E-44 | NK cells |
| Ly75       | 1.90E-46 | 0.754  | 0.251 | 0.058 | 3.80E-43 | NK cells |
| Ryr2.2     | 7.14E-46 | -0.681 | 0.565 | 0.182 | 1.43E-42 | NK cells |
| Ptpn22.6   | 2.89E-45 | 1.783  | 0.730 | 0.358 | 5.77E-42 | NK cells |
| Dock5.2    | 2.90E-45 | 1.249  | 0.733 | 0.371 | 5.80E-42 | NK cells |
| Dach2      | 3.81E-45 | 2.302  | 0.267 | 0.1   | 7.61E-42 | NK cells |
| Apoe.5     | 3.62E-44 | -0.831 | 0.919 | 0.497 | 7.23E-41 | NK cells |
| Klra4      | 4.96E-44 | 0.958  | 0.326 | 0.029 | 9.92E-41 | NK cells |
| Nckap1l.6  | 4.01E-43 | 0.612  | 0.850 | 0.42  | 8.03E-40 | NK cells |
| Tbc1d8.1   | 5.32E-43 | 0.507  | 0.808 | 0.309 | 1.06E-39 | NK cells |
| Tmem123    | 1.99E-42 | 1.274  | 0.699 | 0.281 | 3.97E-39 | NK cells |
| Ly6a.5     | 8.80E-42 | -0.555 | 0.256 | 0.337 | 1.76E-38 | NK cells |
| Lcp1.6     | 9.67E-42 | 0.951  | 0.816 | 0.456 | 1.93E-38 | NK cells |
| Bcl2l1.1   | 9.88E-42 | 0.887  | 0.866 | 0.578 | 1.98E-38 | NK cells |
| Pmepa1.3   | 3.89E-41 | -0.990 | 0.304 | 0.423 | 7.79E-38 | NK cells |
| Myo3b      | 1.42E-40 | 0.714  | 0.270 | 0.142 | 2.83E-37 | NK cells |
| Nav2.5     | 1.54E-40 | 2.041  | 0.708 | 0.425 | 3.08E-37 | NK cells |
| Gpnm.5     | 2.00E-40 | -1.013 | 0.802 | 0.387 | 4.00E-37 | NK cells |
| Anxa1.3    | 5.75E-40 | -0.755 | 0.320 | 0.593 | 1.15E-36 | NK cells |
| Prkcb.6    | 6.28E-40 | 0.878  | 0.822 | 0.457 | 1.26E-36 | NK cells |
| Nlr3.2     | 2.77E-39 | 1.361  | 0.699 | 0.426 | 5.55E-36 | NK cells |
| Ptpcap     | 7.58E-39 | 1.122  | 0.504 | 0.005 | 1.52E-35 | NK cells |
| Specc1.5   | 2.01E-38 | 0.879  | 0.886 | 0.512 | 4.03E-35 | NK cells |
| Slc1a5.5   | 2.94E-38 | -1.655 | 0.373 | 0.489 | 5.87E-35 | NK cells |
| Fam13a.4   | 3.56E-38 | -0.888 | 0.788 | 0.361 | 7.12E-35 | NK cells |
| Ccdc80.4   | 7.47E-38 | -1.803 | 0.357 | 0.523 | 1.49E-34 | NK cells |
| Igfbp6.5   | 2.46E-37 | -0.865 | 0.273 | 0.281 | 4.92E-34 | NK cells |
| Igfbp7.5   | 2.85E-37 | -0.564 | 0.315 | 0.371 | 5.70E-34 | NK cells |
| Kcnq1.3    | 3.05E-37 | -0.691 | 0.376 | 0.559 | 6.11E-34 | NK cells |
| Tmtc2.4    | 4.39E-37 | 0.615  | 0.295 | 0.575 | 8.79E-34 | NK cells |
| Optn.5     | 9.18E-37 | -0.648 | 0.721 | 0.266 | 1.84E-33 | NK cells |
| Smoc2.4    | 1.05E-36 | -0.508 | 0.783 | 0.413 | 2.09E-33 | NK cells |
| Irs1.4     | 9.25E-36 | -1.036 | 0.150 | 0.47  | 1.85E-32 | NK cells |
| Kcnq5.4    | 1.23E-35 | 2.454  | 0.682 | 0.475 | 2.46E-32 | NK cells |
| Calm2.3    | 6.88E-35 | 0.567  | 0.858 | 0.441 | 1.38E-31 | NK cells |
| Gucy1a2.4  | 3.46E-34 | -0.583 | 0.783 | 0.386 | 6.92E-31 | NK cells |
| Epha3.5    | 4.10E-34 | -0.706 | 0.788 | 0.421 | 8.20E-31 | NK cells |
| Car8.5     | 4.24E-34 | -0.603 | 0.730 | 0.345 | 8.48E-31 | NK cells |
| Ppp1r16b   | 7.90E-34 | 1.487  | 0.574 | 0.125 | 1.58E-30 | NK cells |
| Meox2.4    | 6.80E-33 | -0.712 | 0.791 | 0.433 | 1.36E-29 | NK cells |
| F13a1.5    | 1.46E-32 | -0.819 | 0.914 | 0.553 | 2.91E-29 | NK cells |
| Srgap3.1   | 1.46E-32 | 0.531  | 0.738 | 0.404 | 2.93E-29 | NK cells |
| Ank.4      | 1.59E-32 | 0.648  | 0.861 | 0.495 | 3.18E-29 | NK cells |
| Slc9a7     | 1.72E-32 | 0.871  | 0.749 | 0.372 | 3.44E-29 | NK cells |
| Malt1.3    | 2.75E-32 | 1.372  | 0.744 | 0.474 | 5.50E-29 | NK cells |
| Rgs6.4     | 1.03E-31 | -1.287 | 0.201 | 0.529 | 2.07E-28 | NK cells |
| Dst.4      | 2.68E-31 | -1.506 | 0.574 | 0.66  | 5.35E-28 | NK cells |
| Rasa1.6    | 6.85E-31 | 0.639  | 0.947 | 0.705 | 1.37E-27 | NK cells |
| Msrb3.4    | 7.47E-31 | -0.791 | 0.365 | 0.503 | 1.49E-27 | NK cells |
| Zc3h12c    | 5.04E-30 | 0.698  | 0.811 | 0.472 | 1.01E-26 | NK cells |
| Traf1      | 3.35E-29 | 1.080  | 0.565 | 0.119 | 6.71E-26 | NK cells |
| Cd44.6     | 9.12E-29 | 0.580  | 0.811 | 0.487 | 1.82E-25 | NK cells |
| Trab2b.4   | 1.15E-28 | -0.814 | 0.081 | 0.357 | 2.30E-25 | NK cells |
| Adamts13.4 | 1.17E-28 | -0.646 | 0.791 | 0.432 | 2.34E-25 | NK cells |
| Dusp5      | 1.29E-28 | 0.582  | 0.253 | 0.1   | 2.58E-25 | NK cells |
| Cadm1.6    | 1.86E-28 | -0.977 | 0.819 | 0.392 | 3.72E-25 | NK cells |
| Fyb.6      | 3.64E-28 | 0.604  | 0.822 | 0.52  | 7.28E-25 | NK cells |

|            |          |        |       |       |          |          |
|------------|----------|--------|-------|-------|----------|----------|
| Tns1.3     | 4.79E-28 | -1.243 | 0.919 | 0.858 | 9.57E-25 | NK cells |
| Cyfp2      | 1.10E-27 | 1.377  | 0.568 | 0.145 | 2.20E-24 | NK cells |
| Hmcn2.4    | 1.66E-27 | -0.954 | 0.769 | 0.398 | 3.31E-24 | NK cells |
| Pacrg.5    | 4.83E-27 | -0.733 | 0.777 | 0.42  | 9.66E-24 | NK cells |
| Tspan12.3  | 7.78E-27 | -1.018 | 0.560 | 0.227 | 1.56E-23 | NK cells |
| Scml4      | 1.24E-26 | 1.577  | 0.607 | 0.304 | 2.47E-23 | NK cells |
| Gbe1.2     | 1.81E-26 | 0.523  | 0.866 | 0.562 | 3.61E-23 | NK cells |
| Ly6e.3     | 3.28E-26 | 1.326  | 0.602 | 0.274 | 6.56E-23 | NK cells |
| St8sia4.6  | 5.55E-26 | 1.087  | 0.724 | 0.4   | 1.11E-22 | NK cells |
| Itgal      | 8.72E-26 | 0.929  | 0.546 | 0.059 | 1.74E-22 | NK cells |
| Sgip1.5    | 1.73E-25 | -0.559 | 0.749 | 0.486 | 3.46E-22 | NK cells |
| Me1.4      | 2.28E-25 | -1.029 | 0.560 | 0.241 | 4.56E-22 | NK cells |
| Bmp6.5     | 5.61E-25 | -0.811 | 0.791 | 0.442 | 1.12E-21 | NK cells |
| Itpr1.3    | 1.02E-24 | 0.656  | 0.855 | 0.603 | 2.04E-21 | NK cells |
| Fmo1.3     | 3.70E-24 | -0.567 | 0.769 | 0.367 | 7.41E-21 | NK cells |
| Gfod1      | 3.78E-24 | 0.901  | 0.649 | 0.374 | 7.56E-21 | NK cells |
| Tshr.4     | 5.67E-24 | -1.645 | 0.493 | 0.192 | 1.13E-20 | NK cells |
| Cavin2.2   | 7.58E-24 | -0.598 | 0.474 | 0.191 | 1.52E-20 | NK cells |
| Themis     | 9.89E-24 | 2.176  | 0.329 | 0.135 | 1.98E-20 | NK cells |
| Chrdl1.3   | 1.12E-23 | -0.700 | 0.772 | 0.393 | 2.23E-20 | NK cells |
| Nrg4.4     | 1.27E-23 | -1.112 | 0.487 | 0.19  | 2.54E-20 | NK cells |
| Rab27a     | 2.21E-23 | 1.497  | 0.540 | 0.071 | 4.41E-20 | NK cells |
| Mbnl3      | 2.37E-23 | 0.747  | 0.538 | 0.134 | 4.75E-20 | NK cells |
| Spata13    | 3.64E-23 | 1.380  | 0.540 | 0.136 | 7.28E-20 | NK cells |
| Icos       | 5.78E-23 | 0.866  | 0.290 | 0.245 | 1.16E-19 | NK cells |
| Por.3      | 9.14E-23 | -0.630 | 0.231 | 0.397 | 1.83E-19 | NK cells |
| Cd300a.6   | 9.65E-23 | -0.545 | 0.825 | 0.353 | 1.93E-19 | NK cells |
| Pik3r5.6   | 4.07E-22 | 0.998  | 0.696 | 0.393 | 8.14E-19 | NK cells |
| Dtna.3     | 5.02E-22 | -0.553 | 0.064 | 0.361 | 1.00E-18 | NK cells |
| Cobll1.4   | 5.07E-22 | 1.252  | 0.669 | 0.431 | 1.01E-18 | NK cells |
| Prkch.4    | 1.11E-21 | 1.443  | 0.680 | 0.441 | 2.22E-18 | NK cells |
| Col4a2.5   | 1.27E-21 | -1.224 | 0.407 | 0.463 | 2.53E-18 | NK cells |
| Pola1.3    | 1.74E-21 | 0.563  | 0.875 | 0.644 | 3.48E-18 | NK cells |
| Sema3d.4   | 2.49E-21 | -0.741 | 0.774 | 0.342 | 4.97E-18 | NK cells |
| Ppp1r9a.2  | 3.25E-21 | -1.062 | 0.811 | 0.686 | 6.50E-18 | NK cells |
| Tbx21      | 3.51E-21 | 1.139  | 0.312 | 0.085 | 7.03E-18 | NK cells |
| Col8a1.6   | 3.85E-21 | -0.894 | 0.727 | 0.356 | 7.70E-18 | NK cells |
| Acox1.4    | 3.91E-21 | -0.653 | 0.786 | 0.368 | 7.83E-18 | NK cells |
| Nebi       | 4.25E-21 | 2.028  | 0.515 | 0.135 | 8.50E-18 | NK cells |
| Tspan18.2  | 4.96E-21 | -0.527 | 0.716 | 0.319 | 9.92E-18 | NK cells |
| Lipa.3     | 8.22E-21 | -0.614 | 0.730 | 0.296 | 1.64E-17 | NK cells |
| Id2        | 1.03E-20 | 1.067  | 0.549 | 0.127 | 2.06E-17 | NK cells |
| Col15a1.5  | 1.13E-20 | -0.831 | 0.769 | 0.384 | 2.25E-17 | NK cells |
| Ctla2a     | 1.20E-20 | 0.936  | 0.290 | 0.017 | 2.39E-17 | NK cells |
| Snhg11.4   | 1.34E-20 | -0.718 | 0.045 | 0.315 | 2.67E-17 | NK cells |
| Cdh13.4    | 2.69E-20 | -0.876 | 0.799 | 0.488 | 5.38E-17 | NK cells |
| Asph.3     | 6.50E-20 | -1.080 | 0.855 | 0.759 | 1.30E-16 | NK cells |
| Mpp7.5     | 2.10E-19 | -1.352 | 0.217 | 0.305 | 4.19E-16 | NK cells |
| Atp6v0d2.6 | 2.16E-19 | -1.018 | 0.799 | 0.415 | 4.33E-16 | NK cells |
| Klra9      | 4.62E-19 | 0.584  | 0.345 | 0.007 | 9.25E-16 | NK cells |
| Mical3.3   | 4.70E-19 | -0.757 | 0.382 | 0.472 | 9.39E-16 | NK cells |
| Prkar2b.5  | 5.66E-19 | -2.027 | 0.680 | 0.269 | 1.13E-15 | NK cells |
| Coro2a.4   | 6.31E-19 | 1.287  | 0.607 | 0.303 | 1.26E-15 | NK cells |
| Ggta1.1    | 6.90E-19 | 0.622  | 0.337 | 0.274 | 1.38E-15 | NK cells |
| C7.4       | 7.83E-19 | -1.612 | 0.788 | 0.413 | 1.57E-15 | NK cells |
| Gpm6b.4    | 8.00E-19 | -0.623 | 0.685 | 0.347 | 1.60E-15 | NK cells |
| Mme.5      | 8.72E-19 | -0.636 | 0.139 | 0.382 | 1.74E-15 | NK cells |
| Plxnc1.6   | 9.08E-19 | 0.964  | 0.354 | 0.354 | 1.82E-15 | NK cells |
| Ccnd2      | 1.49E-18 | 1.274  | 0.591 | 0.333 | 2.98E-15 | NK cells |
| Lef1       | 1.97E-18 | 1.175  | 0.343 | 0.062 | 3.94E-15 | NK cells |
| Prex2.3    | 2.14E-18 | -0.663 | 0.819 | 0.489 | 4.29E-15 | NK cells |
| Stap1.4    | 3.28E-18 | 0.736  | 0.610 | 0.269 | 6.56E-15 | NK cells |

|            |          |        |       |       |          |          |
|------------|----------|--------|-------|-------|----------|----------|
| Timp3.6    | 3.86E-18 | -1.033 | 0.265 | 0.45  | 7.73E-15 | NK cells |
| Prr16.4    | 7.03E-18 | -1.617 | 0.772 | 0.384 | 1.41E-14 | NK cells |
| Cacna1d.6  | 7.37E-18 | -0.510 | 0.841 | 0.468 | 1.47E-14 | NK cells |
| Pi16.4     | 1.65E-17 | -1.673 | 0.504 | 0.518 | 3.30E-14 | NK cells |
| Sytl3      | 2.35E-17 | 1.071  | 0.334 | 0.051 | 4.71E-14 | NK cells |
| Plxna4.6   | 5.60E-17 | -0.550 | 0.827 | 0.471 | 1.12E-13 | NK cells |
| Ms4a4b     | 6.18E-17 | 2.295  | 0.524 | 0.137 | 1.24E-13 | NK cells |
| Rel.4      | 6.86E-17 | 0.801  | 0.318 | 0.319 | 1.37E-13 | NK cells |
| Klri1      | 8.67E-17 | 0.611  | 0.493 | 0.101 | 1.73E-13 | NK cells |
| Klrd1      | 9.64E-17 | 0.790  | 0.284 | 0.05  | 1.93E-13 | NK cells |
| Ccl5       | 1.02E-16 | 2.212  | 0.345 | 0.019 | 2.03E-13 | NK cells |
| Angpt1.4   | 1.10E-16 | -1.052 | 0.571 | 0.523 | 2.20E-13 | NK cells |
| Ptprk.4    | 1.30E-16 | -0.718 | 0.786 | 0.412 | 2.60E-13 | NK cells |
| Anxa2.5    | 2.13E-16 | -0.619 | 0.407 | 0.535 | 4.26E-13 | NK cells |
| Cfh.5      | 2.29E-16 | -0.838 | 0.875 | 0.545 | 4.59E-13 | NK cells |
| Sorbs1.5   | 3.02E-16 | -2.042 | 0.295 | 0.3   | 6.03E-13 | NK cells |
| Cat.5      | 3.81E-16 | -0.600 | 0.150 | 0.269 | 7.61E-13 | NK cells |
| Nrcam.2    | 1.05E-15 | -0.546 | 0.125 | 0.37  | 2.10E-12 | NK cells |
| Cd244a     | 1.70E-15 | 0.691  | 0.304 | 0.146 | 3.39E-12 | NK cells |
| Aldh1a3.5  | 1.72E-15 | -0.606 | 0.655 | 0.314 | 3.44E-12 | NK cells |
| Enpp2.5    | 2.67E-15 | -1.286 | 0.092 | 0.347 | 5.34E-12 | NK cells |
| Selenop.5  | 3.05E-15 | -0.629 | 0.855 | 0.475 | 6.10E-12 | NK cells |
| Sema4d     | 3.25E-15 | 1.153  | 0.560 | 0.26  | 6.50E-12 | NK cells |
| Cd52       | 5.38E-15 | 1.321  | 0.507 | 0.13  | 1.08E-11 | NK cells |
| Lgmn.6     | 6.71E-15 | -0.729 | 0.825 | 0.433 | 1.34E-11 | NK cells |
| Aspn.5     | 7.59E-15 | -1.009 | 0.805 | 0.396 | 1.52E-11 | NK cells |
| Pde7a.4    | 1.04E-14 | 0.707  | 0.875 | 0.702 | 2.07E-11 | NK cells |
| Abca8b.5   | 1.81E-14 | -0.806 | 0.802 | 0.444 | 3.62E-11 | NK cells |
| Lpgat1.5   | 2.68E-14 | -1.565 | 0.212 | 0.349 | 5.37E-11 | NK cells |
| Pecam1     | 3.50E-14 | 0.670  | 0.304 | 0.203 | 7.01E-11 | NK cells |
| Kcnk13.6   | 3.86E-14 | -0.633 | 0.819 | 0.464 | 7.72E-11 | NK cells |
| Gabre.5    | 4.34E-14 | -0.553 | 0.189 | 0.357 | 8.67E-11 | NK cells |
| Pdzrn3.5   | 6.08E-14 | -1.270 | 0.799 | 0.436 | 1.22E-10 | NK cells |
| Ctsl.6     | 1.35E-13 | -0.677 | 0.627 | 0.309 | 2.70E-10 | NK cells |
| Samd3      | 2.45E-13 | 2.038  | 0.429 | 0.016 | 4.89E-10 | NK cells |
| C3.5       | 2.49E-13 | -1.046 | 0.072 | 0.299 | 4.99E-10 | NK cells |
| Serpinf1.5 | 2.54E-13 | -0.999 | 0.109 | 0.316 | 5.09E-10 | NK cells |
| Foxo1.3    | 5.05E-13 | -0.650 | 0.613 | 0.664 | 1.01E-09 | NK cells |
| Sfrp4.5    | 5.44E-13 | -0.725 | 0.136 | 0.29  | 1.09E-09 | NK cells |
| Hacd2.6    | 1.08E-12 | -1.204 | 0.206 | 0.292 | 2.17E-09 | NK cells |
| Bcar3.6    | 2.03E-12 | -0.895 | 0.830 | 0.413 | 4.07E-09 | NK cells |
| Cgnl1.2    | 2.18E-12 | -0.516 | 0.780 | 0.4   | 4.36E-09 | NK cells |
| Trbc1      | 2.43E-12 | 1.804  | 0.432 | 0.001 | 4.86E-09 | NK cells |
| Itm2b.4    | 2.81E-12 | 0.525  | 0.760 | 0.555 | 5.62E-09 | NK cells |
| Cxcr6      | 3.18E-12 | 1.360  | 0.493 | 0.124 | 6.36E-09 | NK cells |
| Ucp2.2     | 3.22E-12 | 0.605  | 0.565 | 0.238 | 6.44E-09 | NK cells |
| Il18rap    | 3.33E-12 | 1.377  | 0.504 | 0.09  | 6.65E-09 | NK cells |
| Gimap1     | 4.48E-12 | 0.789  | 0.446 | 0.003 | 8.96E-09 | NK cells |
| Prickle2.3 | 5.67E-12 | -0.656 | 0.772 | 0.454 | 1.13E-08 | NK cells |
| Lama4.4    | 6.39E-12 | -2.011 | 0.791 | 0.645 | 1.28E-08 | NK cells |
| Hsd11b1    | 9.98E-12 | 1.706  | 0.543 | 0.242 | 2.00E-08 | NK cells |
| C4b.2      | 1.55E-11 | -0.726 | 0.833 | 0.522 | 3.09E-08 | NK cells |
| Ikzf2.2    | 3.89E-11 | 2.900  | 0.604 | 0.573 | 7.78E-08 | NK cells |
| Galnt6     | 4.61E-11 | 0.774  | 0.337 | 0.17  | 9.21E-08 | NK cells |
| Sorl1      | 5.85E-11 | 1.241  | 0.526 | 0.182 | 1.17E-07 | NK cells |
| Nkg7       | 9.55E-11 | 1.282  | 0.334 | 0.001 | 1.91E-07 | NK cells |
| Map1b.5    | 1.17E-10 | -0.718 | 0.131 | 0.331 | 2.34E-07 | NK cells |
| Gpc3.5     | 1.75E-10 | -0.854 | 0.769 | 0.416 | 3.50E-07 | NK cells |
| Cytip.2    | 1.95E-10 | 1.225  | 0.540 | 0.184 | 3.90E-07 | NK cells |
| C1qtnf7.5  | 2.43E-10 | -1.175 | 0.404 | 0.472 | 4.86E-07 | NK cells |
| Irf8.2     | 2.80E-10 | 0.642  | 0.362 | 0.272 | 5.60E-07 | NK cells |
| Ngf.5      | 4.64E-10 | -0.568 | 0.167 | 0.313 | 9.29E-07 | NK cells |



|            |          |        |       |       |             |          |
|------------|----------|--------|-------|-------|-------------|----------|
| Relb       | 5.01E-10 | 0.910  | 0.549 | 0.32  | 1.00E-06    | NK cells |
| Xkr4.4     | 5.22E-10 | -0.845 | 0.802 | 0.464 | 1.04E-06    | NK cells |
| Tenm4.6    | 5.69E-10 | -2.726 | 0.805 | 0.404 | 1.14E-06    | NK cells |
| Col4a5.5   | 9.73E-10 | -0.768 | 0.368 | 0.484 | 1.95E-06    | NK cells |
| Fgf7.4     | 1.27E-09 | -0.502 | 0.348 | 0.374 | 2.54E-06    | NK cells |
| Ctsb.6     | 1.34E-09 | -0.895 | 0.844 | 0.45  | 2.68E-06    | NK cells |
| Ptpm.4     | 1.42E-09 | -1.579 | 0.844 | 0.781 | 2.83E-06    | NK cells |
| Gsn.4      | 1.50E-09 | -2.329 | 0.805 | 0.7   | 3.00E-06    | NK cells |
| Smc4.3     | 1.72E-09 | 0.752  | 0.630 | 0.419 | 3.44E-06    | NK cells |
| Thrb.4     | 1.94E-09 | -1.153 | 0.869 | 0.804 | 3.88E-06    | NK cells |
| Fabp4.5    | 2.07E-09 | -1.630 | 0.733 | 0.466 | 4.14E-06    | NK cells |
| Adamts5.4  | 2.24E-09 | -2.229 | 0.830 | 0.68  | 4.49E-06    | NK cells |
| Pltp.5     | 2.43E-09 | -0.724 | 0.844 | 0.432 | 4.85E-06    | NK cells |
| Stox2.4    | 2.51E-09 | -0.669 | 0.794 | 0.446 | 5.02E-06    | NK cells |
| Eln.5      | 2.90E-09 | -1.418 | 0.816 | 0.497 | 5.79E-06    | NK cells |
| Ldb2.5     | 3.49E-09 | -0.775 | 0.493 | 0.468 | 6.98E-06    | NK cells |
| Vegfa.2    | 6.51E-09 | -0.559 | 0.036 | 0.282 | 1.30E-05    | NK cells |
| Pde4b      | 8.50E-09 | 0.971  | 0.529 | 0.228 | 1.70E-05    | NK cells |
| Ubash3b.6  | 9.06E-09 | 0.883  | 0.655 | 0.463 | 1.81E-05    | NK cells |
| Adamts16.4 | 1.02E-08 | -0.976 | 0.214 | 0.368 | 2.05E-05    | NK cells |
| Zbtb7c.2   | 1.70E-08 | -0.527 | 0.825 | 0.487 | 3.39E-05    | NK cells |
| Rin2.3     | 1.80E-08 | -0.801 | 0.864 | 0.73  | 3.59E-05    | NK cells |
| Pmp22      | 2.18E-08 | -0.502 | 0.075 | 0.354 | 4.35E-05    | NK cells |
| Errfi1.5   | 2.42E-08 | -1.006 | 0.819 | 0.524 | 4.83E-05    | NK cells |
| Ghr.6      | 3.80E-08 | -4.120 | 0.836 | 0.646 | 7.60E-05    | NK cells |
| Col4a1.5   | 3.84E-08 | -1.289 | 0.827 | 0.516 | 7.69E-05    | NK cells |
| Ppfia2.4   | 3.87E-08 | -0.501 | 0.042 | 0.256 | 7.74E-05    | NK cells |
| Eepd1.5    | 5.98E-08 | -0.660 | 0.429 | 0.37  | 0.000119519 | NK cells |
| Slc2a13.4  | 7.14E-08 | -0.885 | 0.797 | 0.469 | 0.000142777 | NK cells |
| Gapdh      | 8.38E-08 | 0.501  | 0.267 | 0.138 | 0.000167545 | NK cells |
| Mid1.5     | 8.49E-08 | -1.943 | 0.861 | 0.696 | 0.000169878 | NK cells |
| Ms4a6b.5   | 1.20E-07 | 0.512  | 0.643 | 0.377 | 0.000240276 | NK cells |
| Cdh9.4     | 1.38E-07 | -0.718 | 0.794 | 0.457 | 0.000276829 | NK cells |
| Eya4.4     | 1.47E-07 | -1.138 | 0.643 | 0.574 | 0.000293196 | NK cells |
| Lvm.4      | 1.60E-07 | -1.239 | 0.797 | 0.539 | 0.000320778 | NK cells |
| Serpinh1.4 | 1.61E-07 | -0.590 | 0.460 | 0.256 | 0.000322597 | NK cells |
| Shroom3.3  | 1.69E-07 | -0.585 | 0.086 | 0.305 | 0.000337216 | NK cells |
| Cd3d       | 2.09E-07 | 0.694  | 0.351 | 0.001 | 0.00041772  | NK cells |
| Ipcef1.2   | 2.11E-07 | 1.118  | 0.384 | 0.248 | 0.000422728 | NK cells |
| Adap2.5    | 2.78E-07 | -0.506 | 0.866 | 0.563 | 0.000555788 | NK cells |
| Pparg.4    | 2.83E-07 | -0.977 | 0.852 | 0.586 | 0.00056521  | NK cells |
| Ccser1.3   | 3.18E-07 | -0.534 | 0.766 | 0.498 | 0.00063583  | NK cells |
| Arid5b.5   | 3.80E-07 | 0.651  | 0.827 | 0.695 | 0.000759188 | NK cells |
| Fggy.2     | 4.61E-07 | -0.585 | 0.813 | 0.504 | 0.000921353 | NK cells |
| Fbln2.6    | 4.68E-07 | -1.204 | 0.772 | 0.446 | 0.000935017 | NK cells |
| Ubash3a    | 4.78E-07 | 0.939  | 0.337 | 0.042 | 0.000956034 | NK cells |
| Apod.5     | 7.61E-07 | -0.574 | 0.106 | 0.274 | 0.001522937 | NK cells |
| St18.5     | 8.27E-07 | -0.955 | 0.786 | 0.431 | 0.001653522 | NK cells |
| Bmper.3    | 9.23E-07 | -0.955 | 0.833 | 0.594 | 0.001846536 | NK cells |
| Ppp2r2b.4  | 1.31E-06 | -1.200 | 0.738 | 0.425 | 0.002621924 | NK cells |
| Col6a2.4   | 1.35E-06 | -0.987 | 0.760 | 0.397 | 0.002691761 | NK cells |
| Dlg2.4     | 1.39E-06 | -0.593 | 0.769 | 0.453 | 0.002780284 | NK cells |
| Bgn.5      | 1.49E-06 | -0.718 | 0.368 | 0.227 | 0.00298298  | NK cells |
| Gm37004    | 1.75E-06 | 1.505  | 0.379 | 0.008 | 0.003495933 | NK cells |
| Blnk.6     | 2.14E-06 | -0.550 | 0.819 | 0.471 | 0.004278753 | NK cells |
| Tns3.5     | 2.60E-06 | -0.639 | 0.841 | 0.483 | 0.005191575 | NK cells |
| Dmd.5      | 3.27E-06 | -0.897 | 0.819 | 0.538 | 0.006545295 | NK cells |
| Card11.4   | 3.67E-06 | 1.069  | 0.543 | 0.333 | 0.007331097 | NK cells |
| Lgals3.5   | 3.84E-06 | -0.726 | 0.448 | 0.312 | 0.007684587 | NK cells |
| Sntg1.5    | 3.91E-06 | -1.755 | 0.788 | 0.564 | 0.007824102 | NK cells |
| Mertk.4    | 4.00E-06 | -0.648 | 0.850 | 0.567 | 0.008001281 | NK cells |
| Pip5k1b    | 4.11E-06 | 1.386  | 0.329 | 0.16  | 0.008223488 | NK cells |

|            |           |        |       |       |             |          |
|------------|-----------|--------|-------|-------|-------------|----------|
| Ntn4.5     | 4.50E-06  | -0.894 | 0.688 | 0.394 | 0.00900254  | NK cells |
| Clec3b.5   | 4.51E-06  | -1.459 | 0.604 | 0.5   | 0.009027409 | NK cells |
| Slc27a1.4  | 4.57E-06  | -0.951 | 0.808 | 0.428 | 0.009144692 | NK cells |
| Cav1.3     | 6.27E-06  | -1.344 | 0.309 | 0.205 | 0.012545373 | NK cells |
| Nlgn1.4    | 6.72E-06  | -0.712 | 0.187 | 0.281 | 0.013441238 | NK cells |
| H2afz      | 7.27E-06  | 0.684  | 0.323 | 0.175 | 0.014548537 | NK cells |
| Plpp1.4    | 7.98E-06  | -0.660 | 0.577 | 0.497 | 0.015959811 | NK cells |
| Tox2       | 1.24E-05  | 0.612  | 0.362 | 0.195 | 0.024785325 | NK cells |
| Aldh1a1.5  | 1.57E-05  | -1.611 | 0.855 | 0.727 | 0.031428702 | NK cells |
| Igfbp5.6   | 1.62E-05  | -1.384 | 0.735 | 0.392 | 0.032439128 | NK cells |
| Rab7b.2    | 2.91E-05  | -0.568 | 0.816 | 0.517 | 0.058202007 | NK cells |
| Ptpg.5     | 3.43E-05  | -1.489 | 0.847 | 0.678 | 0.068516355 | NK cells |
| Robo1.5    | 3.47E-05  | -1.183 | 0.811 | 0.559 | 0.069347619 | NK cells |
| S100a4     | 3.49E-05  | 0.745  | 0.323 | 0.119 | 0.069856054 | NK cells |
| Lpl.6      | 3.69E-05  | -1.227 | 0.858 | 0.567 | 0.073794619 | NK cells |
| Pcolce2.4  | 4.06E-05  | -1.053 | 0.780 | 0.471 | 0.081206775 | NK cells |
| Rpl10      | 5.69E-05  | 0.765  | 0.309 | 0.177 | 0.113763074 | NK cells |
| Postn.6    | 6.92E-05  | -1.213 | 0.741 | 0.415 | 0.138482422 | NK cells |
| Thsd4.4    | 7.45E-05  | -0.597 | 0.262 | 0.283 | 0.148948178 | NK cells |
| Gask1b.4   | 0.0001121 | -0.851 | 0.799 | 0.5   | 0.224190109 | NK cells |
| Btg1.2     | 0.0001483 | 0.804  | 0.499 | 0.263 | 0.296690714 | NK cells |
| Adcy5.4    | 0.0001554 | -0.632 | 0.089 | 0.258 | 0.310824772 | NK cells |
| Tead1.5    | 0.0001705 | -1.585 | 0.819 | 0.666 | 0.341087433 | NK cells |
| Rps27a     | 0.0001781 | 0.961  | 0.329 | 0.204 | 0.356269739 | NK cells |
| Pcdh19.6   | 0.0001855 | -1.152 | 0.808 | 0.531 | 0.371023171 | NK cells |
| Gprn3.1    | 0.000198  | 0.809  | 0.471 | 0.112 | 0.395905666 | NK cells |
| Pcdh9.4    | 0.0002497 | -1.740 | 0.819 | 0.59  | 0.499406717 | NK cells |
| Pde1a.5    | 0.0002568 | -1.080 | 0.591 | 0.489 | 0.513659182 | NK cells |
| Prkd1.5    | 0.0002587 | -2.088 | 0.802 | 0.576 | 0.517445668 | NK cells |
| Slc24a3.4  | 0.0002857 | -0.803 | 0.646 | 0.593 | 0.571406732 | NK cells |
| P2ry10     | 0.0003415 | 0.607  | 0.351 | 0.017 | 0.683064399 | NK cells |
| Sema3a.4   | 0.0003924 | -0.502 | 0.496 | 0.355 | 0.784814217 | NK cells |
| Ugdh.4     | 0.0004383 | -0.848 | 0.758 | 0.454 | 0.876582091 | NK cells |
| Pde7b.6    | 0.0004429 | -0.527 | 0.872 | 0.785 | 0.885717082 | NK cells |
| Fnip2.5    | 0.0004558 | -0.842 | 0.872 | 0.744 | 0.911577491 | NK cells |
| Cdk6.4     | 0.0004676 | 1.114  | 0.577 | 0.498 | 0.935105621 | NK cells |
| Lgr4.3     | 0.0005302 | -1.152 | 0.490 | 0.44  | 1           | NK cells |
| Col12a1.5  | 0.0005966 | -1.122 | 0.696 | 0.375 | 1           | NK cells |
| Rasgrf2.1  | 0.000633  | -0.524 | 0.471 | 0.208 | 1           | NK cells |
| Rap1gap2.4 | 0.0006381 | 0.622  | 0.409 | 0.315 | 1           | NK cells |
| Dram1.5    | 0.0006759 | -0.798 | 0.047 | 0.259 | 1           | NK cells |
| Rps2       | 0.0007649 | 0.826  | 0.320 | 0.176 | 1           | NK cells |
| Sgcd.5     | 0.0007649 | -2.271 | 0.780 | 0.605 | 1           | NK cells |
| Col1a1.5   | 0.0009943 | -1.633 | 0.788 | 0.491 | 1           | NK cells |
| Svep1.4    | 0.0010495 | -1.715 | 0.816 | 0.623 | 1           | NK cells |
| Atp6v0a1.5 | 0.0010555 | -0.879 | 0.891 | 0.649 | 1           | NK cells |
| Tmem135.5  | 0.0010975 | -0.656 | 0.852 | 0.596 | 1           | NK cells |
| Negr1.5    | 0.0011209 | -1.486 | 0.889 | 0.754 | 1           | NK cells |
| Galnt17.6  | 0.0011242 | -1.153 | 0.802 | 0.561 | 1           | NK cells |
| Tes.3      | 0.001168  | 0.832  | 0.513 | 0.31  | 1           | NK cells |
| Tank.5     | 0.0012081 | 0.570  | 0.733 | 0.641 | 1           | NK cells |
| Cd200r1.6  | 0.0012218 | 0.574  | 0.621 | 0.431 | 1           | NK cells |
| Hmgb2      | 0.0013104 | 0.633  | 0.348 | 0.158 | 1           | NK cells |
| Il2ra      | 0.0013786 | 1.994  | 0.454 | 0.06  | 1           | NK cells |
| Fgf10.5    | 0.0014621 | -0.907 | 0.515 | 0.361 | 1           | NK cells |
| Kcnt2.4    | 0.0014643 | -1.291 | 0.794 | 0.59  | 1           | NK cells |
| Acss3.3    | 0.0016663 | -1.672 | 0.799 | 0.598 | 1           | NK cells |
| Slit2.3    | 0.0017831 | -0.767 | 0.334 | 0.344 | 1           | NK cells |
| Tln2.4     | 0.0018531 | -0.982 | 0.755 | 0.454 | 1           | NK cells |
| Adamts12.4 | 0.0021671 | -1.612 | 0.861 | 0.732 | 1           | NK cells |
| Tagln2     | 0.00226   | 0.575  | 0.345 | 0.214 | 1           | NK cells |
| Vcl.5      | 0.0023009 | -0.770 | 0.721 | 0.568 | 1           | NK cells |

|            |           |        |       |       |   |          |
|------------|-----------|--------|-------|-------|---|----------|
| Slc25a21.5 | 0.0030238 | -0.542 | 0.192 | 0.276 | 1 | NK cells |
| Lhfpl2.4   | 0.003693  | -1.167 | 0.772 | 0.452 | 1 | NK cells |
| Tcaf1.3    | 0.0038616 | -0.907 | 0.758 | 0.434 | 1 | NK cells |
| Vgll3.3    | 0.0041872 | -1.615 | 0.813 | 0.592 | 1 | NK cells |
| Pcsk5.4    | 0.0044113 | -1.663 | 0.799 | 0.622 | 1 | NK cells |
| Mgll.4     | 0.0048639 | -1.304 | 0.741 | 0.44  | 1 | NK cells |
| Ctdspl.2   | 0.0049427 | -0.680 | 0.791 | 0.518 | 1 | NK cells |
| B3galt1.3  | 0.0057992 | -1.420 | 0.727 | 0.588 | 1 | NK cells |
| Rpl15      | 0.0058571 | 0.779  | 0.329 | 0.166 | 1 | NK cells |
| Eya2.3     | 0.0060941 | 0.583  | 0.462 | 0.425 | 1 | NK cells |
| Tpt1       | 0.0064196 | 1.662  | 0.359 | 0.239 | 1 | NK cells |
| Hsp90ab1   | 0.0066087 | 1.045  | 0.443 | 0.288 | 1 | NK cells |
| Figl.4     | 0.0074273 | -0.798 | 0.724 | 0.441 | 1 | NK cells |
| Mtss1.5    | 0.0085144 | -0.725 | 0.894 | 0.604 | 1 | NK cells |
| Aox1.3     | 0.0091955 | -1.009 | 0.772 | 0.462 | 1 | NK cells |
| Prkg1.5    | 0.0092361 | -1.350 | 0.883 | 0.716 | 1 | NK cells |
| Ror1.5     | 0.0096717 | -0.998 | 0.808 | 0.605 | 1 | NK cells |
| Lgals1     | 0.0099104 | 0.817  | 0.343 | 0.23  | 1 | NK cells |
| Thsd7a.5   | 0.0099192 | -1.927 | 0.833 | 0.689 | 1 | NK cells |
|            |           |        |       |       |   |          |
|            |           |        |       |       |   |          |
|            |           |        |       |       |   |          |
|            |           |        |       |       |   |          |

Extended Data Table 8: maker genes for preadipocyte clusters identified in 10x snRNA seq of ingWAT CAG-GFP and CAG-RSPO2

| gene     | p_val     | avg_log2FC | pct.1 | pct.2 | p_val_adj | cluster |
|----------|-----------|------------|-------|-------|-----------|---------|
| Sema3e   | 0         | 2.485      | 0.823 | 0.203 | 0         | PA-1    |
| Pi16     | 0         | 2.436      | 0.941 | 0.408 | 0         | PA-1    |
| Igfbp5   | 0         | 2.400      | 0.829 | 0.312 | 0         | PA-1    |
| Nav3     | 0         | 2.238      | 0.968 | 0.641 | 0         | PA-1    |
| Dpp4     | 0         | 2.133      | 0.977 | 0.507 | 0         | PA-1    |
| Limch1   | 0         | 2.098      | 0.883 | 0.287 | 0         | PA-1    |
| Anxa3    | 0         | 1.932      | 0.971 | 0.586 | 0         | PA-1    |
| Creb5    | 0         | 1.892      | 0.994 | 0.755 | 0         | PA-1    |
| Sema3c   | 0         | 1.865      | 0.987 | 0.692 | 0         | PA-1    |
| Cd55     | 0         | 1.796      | 0.869 | 0.403 | 0         | PA-1    |
| Cmah     | 0         | 1.771      | 0.806 | 0.305 | 0         | PA-1    |
| Efna5    | 0         | 1.747      | 0.786 | 0.32  | 0         | PA-1    |
| Ston2    | 0         | 1.741      | 0.806 | 0.295 | 0         | PA-1    |
| Efemp1   | 0         | 1.707      | 0.912 | 0.495 | 0         | PA-1    |
| Efhd1    | 0         | 1.657      | 0.653 | 0.155 | 0         | PA-1    |
| Ano3     | 0         | 1.590      | 0.688 | 0.195 | 0         | PA-1    |
| Tek      | 0         | 1.586      | 0.837 | 0.402 | 0         | PA-1    |
| Gfpt2    | 0         | 1.576      | 0.927 | 0.547 | 0         | PA-1    |
| Fbn1     | 0         | 1.449      | 0.998 | 0.943 | 0         | PA-1    |
| Pla1a    | 0         | 1.409      | 0.777 | 0.348 | 0         | PA-1    |
| Slco3a1  | 0         | 1.167      | 0.922 | 0.667 | 0         | PA-1    |
| Axl      | 0         | 1.162      | 0.882 | 0.596 | 0         | PA-1    |
| Fndc1    | 0         | 1.128      | 0.985 | 0.819 | 0         | PA-1    |
| Sdk1     | 0         | 0.945      | 0.991 | 0.804 | 0         | PA-1    |
| Nfib     | 0         | -1.110     | 0.9   | 0.982 | 0         | PA-1    |
| Sparcl1  | 0         | -1.272     | 0.011 | 0.355 | 0         | PA-1    |
| Myo5a    | 0         | -1.274     | 0.085 | 0.493 | 0         | PA-1    |
| Nrp1     | 0         | -1.608     | 0.293 | 0.754 | 0         | PA-1    |
| Col15a1  | 0         | -1.646     | 0.017 | 0.446 | 0         | PA-1    |
| Igfbp7   | 0         | -1.812     | 0.234 | 0.717 | 0         | PA-1    |
| Pde4d    | 0         | -1.839     | 0.046 | 0.443 | 0         | PA-1    |
| Vav3     | 0         | -1.885     | 0.041 | 0.571 | 0         | PA-1    |
| Bgn      | 0         | -1.945     | 0.135 | 0.634 | 0         | PA-1    |
| Ldb2     | 0         | -1.982     | 0.133 | 0.649 | 0         | PA-1    |
| Sgip1    | 0         | -2.063     | 0.034 | 0.499 | 0         | PA-1    |
| Col4a2   | 0         | -2.111     | 0.161 | 0.713 | 0         | PA-1    |
| Bmper    | 0         | -2.116     | 0.184 | 0.676 | 0         | PA-1    |
| Hmcn2    | 0         | -2.118     | 0.133 | 0.578 | 0         | PA-1    |
| Adam12   | 0         | -2.314     | 0.061 | 0.456 | 0         | PA-1    |
| Col4a1   | 0         | -2.369     | 0.238 | 0.803 | 0         | PA-1    |
| Fmo2     | 0         | -2.514     | 0.055 | 0.502 | 0         | PA-1    |
| Smurf2   | 3.02E-305 | 1.176      | 0.936 | 0.77  | 6.02E-301 | PA-1    |
| Adamts5  | 3.42E-304 | 1.215      | 0.928 | 0.726 | 6.82E-300 | PA-1    |
| Eps8     | 1.97E-301 | -1.414     | 0.228 | 0.659 | 3.94E-297 | PA-1    |
| F3       | 2.65E-298 | -1.732     | 0.028 | 0.376 | 5.28E-294 | PA-1    |
| Adamts16 | 1.24E-294 | 1.900      | 0.486 | 0.055 | 2.47E-290 | PA-1    |
| Lurap1l  | 1.15E-291 | 1.427      | 0.712 | 0.279 | 2.29E-287 | PA-1    |
| Hdac7    | 1.18E-291 | 1.109      | 0.884 | 0.649 | 2.36E-287 | PA-1    |
| Rorb     | 1.28E-291 | 1.655      | 0.657 | 0.206 | 2.55E-287 | PA-1    |
| Ddr2     | 6.66E-291 | 0.875      | 0.98  | 0.894 | 1.33E-286 | PA-1    |
| Col6a3   | 1.97E-289 | -1.524     | 0.41  | 0.764 | 3.92E-285 | PA-1    |
| Dact2    | 2.50E-287 | 1.722      | 0.477 | 0.057 | 5.00E-283 | PA-1    |
| Kank1    | 1.05E-286 | 1.475      | 0.6   | 0.164 | 2.09E-282 | PA-1    |
| Auts2    | 3.12E-284 | -1.380     | 0.56  | 0.871 | 6.23E-280 | PA-1    |
| Car8     | 3.46E-283 | 1.523      | 0.553 | 0.118 | 6.90E-279 | PA-1    |
| Aldh1a3  | 6.37E-281 | 1.529      | 0.529 | 0.108 | 1.27E-276 | PA-1    |
| Ank2     | 1.53E-279 | -1.329     | 0.554 | 0.867 | 3.05E-275 | PA-1    |
| Fn1      | 8.54E-278 | 1.046      | 0.973 | 0.757 | 1.70E-273 | PA-1    |

|         |           |        |       |       |           |      |
|---------|-----------|--------|-------|-------|-----------|------|
| Gan     | 3.87E-277 | 1.714  | 0.633 | 0.233 | 7.72E-273 | PA-1 |
| Adgrd1  | 6.32E-276 | 0.910  | 0.966 | 0.815 | 1.26E-271 | PA-1 |
| Galnt16 | 1.63E-272 | 1.218  | 0.797 | 0.439 | 3.26E-268 | PA-1 |
| Gas6    | 5.29E-269 | -1.253 | 0.026 | 0.348 | 1.06E-264 | PA-1 |
| Dock10  | 1.61E-268 | -1.265 | 0.234 | 0.646 | 3.21E-264 | PA-1 |
| Ccbe1   | 2.21E-266 | -1.860 | 0.033 | 0.357 | 4.40E-262 | PA-1 |
| Pparg   | 4.53E-264 | -1.513 | 0.027 | 0.347 | 9.03E-260 | PA-1 |
| Opcml   | 6.64E-264 | 0.977  | 0.984 | 0.774 | 1.32E-259 | PA-1 |
| Zfp462  | 6.33E-261 | 1.260  | 0.788 | 0.43  | 1.26E-256 | PA-1 |
| Gria3   | 6.50E-261 | -1.386 | 0.205 | 0.622 | 1.30E-256 | PA-1 |
| Mfap5   | 6.78E-261 | 1.189  | 0.898 | 0.708 | 1.35E-256 | PA-1 |
| Deptor  | 3.70E-260 | -1.449 | 0.156 | 0.541 | 7.38E-256 | PA-1 |
| Eya2    | 3.55E-259 | -1.272 | 0.112 | 0.496 | 7.08E-255 | PA-1 |
| Pde11a  | 4.65E-259 | -2.170 | 0.045 | 0.374 | 9.28E-255 | PA-1 |
| Agmo    | 1.73E-258 | -1.209 | 0.592 | 0.896 | 3.46E-254 | PA-1 |
| Pde8a   | 1.81E-258 | 1.119  | 0.845 | 0.563 | 3.62E-254 | PA-1 |
| Slco2b1 | 3.45E-256 | -1.238 | 0.085 | 0.445 | 6.89E-252 | PA-1 |
| Sulf1   | 1.31E-255 | 1.002  | 0.933 | 0.741 | 2.62E-251 | PA-1 |
| Lum     | 1.55E-252 | -1.311 | 0.11  | 0.47  | 3.10E-248 | PA-1 |
| Ackr3   | 1.39E-250 | 1.252  | 0.779 | 0.439 | 2.78E-246 | PA-1 |
| Nova1   | 1.98E-250 | 0.944  | 0.975 | 0.855 | 3.95E-246 | PA-1 |
| Gask1b  | 1.22E-249 | -1.314 | 0.129 | 0.503 | 2.43E-245 | PA-1 |
| Pcsk6   | 2.01E-242 | 1.260  | 0.745 | 0.388 | 4.01E-238 | PA-1 |
| Ebf2    | 1.52E-237 | 0.897  | 0.992 | 0.948 | 3.03E-233 | PA-1 |
| Stxbp6  | 8.15E-236 | 1.100  | 0.843 | 0.486 | 1.63E-231 | PA-1 |
| Gas7    | 7.27E-235 | 1.008  | 0.939 | 0.749 | 1.45E-230 | PA-1 |
| Ildr2   | 6.19E-233 | 1.325  | 0.632 | 0.259 | 1.23E-228 | PA-1 |
| Ebf1    | 8.51E-233 | 0.745  | 0.999 | 0.995 | 1.70E-228 | PA-1 |
| Adgrg2  | 2.01E-230 | 1.221  | 0.618 | 0.223 | 4.01E-226 | PA-1 |
| Lpl     | 6.74E-229 | -1.349 | 0.034 | 0.33  | 1.35E-224 | PA-1 |
| Plpp1   | 7.65E-229 | -1.272 | 0.155 | 0.516 | 1.53E-224 | PA-1 |
| Steap4  | 9.24E-229 | -0.981 | 0.01  | 0.273 | 1.84E-224 | PA-1 |
| Svep1   | 9.72E-229 | -1.369 | 0.488 | 0.787 | 1.94E-224 | PA-1 |
| Gdf10   | 1.30E-228 | -1.289 | 0.013 | 0.28  | 2.59E-224 | PA-1 |
| Itgbl1  | 6.30E-227 | -1.382 | 0.598 | 0.854 | 1.26E-222 | PA-1 |
| Fam49a  | 2.35E-226 | -1.190 | 0.139 | 0.495 | 4.69E-222 | PA-1 |
| Negr1   | 1.09E-222 | 1.592  | 0.691 | 0.364 | 2.17E-218 | PA-1 |
| Sbsn    | 6.06E-222 | 1.530  | 0.41  | 0.059 | 1.21E-217 | PA-1 |
| Samhd1  | 6.10E-222 | 1.067  | 0.818 | 0.546 | 1.22E-217 | PA-1 |
| Ror1    | 4.06E-221 | -1.209 | 0.439 | 0.775 | 8.10E-217 | PA-1 |
| Plcl2   | 5.85E-221 | -1.146 | 0.074 | 0.393 | 1.17E-216 | PA-1 |
| Igf1    | 5.33E-219 | -1.269 | 0.097 | 0.428 | 1.06E-214 | PA-1 |
| Slc4a4  | 3.46E-217 | 0.875  | 0.939 | 0.735 | 6.91E-213 | PA-1 |
| Rgs6    | 1.65E-214 | 1.769  | 0.546 | 0.179 | 3.29E-210 | PA-1 |
| Fyn     | 9.63E-214 | 0.784  | 0.928 | 0.783 | 1.92E-209 | PA-1 |
| Fgf2    | 1.83E-212 | 1.106  | 0.673 | 0.314 | 3.64E-208 | PA-1 |
| Frmd6   | 6.36E-212 | -1.194 | 0.621 | 0.844 | 1.27E-207 | PA-1 |
| Calcr1  | 4.13E-211 | 1.401  | 0.638 | 0.274 | 8.24E-207 | PA-1 |
| Nrep    | 2.72E-209 | -1.256 | 0.127 | 0.457 | 5.43E-205 | PA-1 |
| Dock4   | 1.38E-208 | 1.009  | 0.916 | 0.766 | 2.76E-204 | PA-1 |
| Nhs1    | 7.45E-208 | 1.014  | 0.843 | 0.589 | 1.49E-203 | PA-1 |
| Ptprj   | 1.10E-207 | 0.904  | 0.861 | 0.565 | 2.19E-203 | PA-1 |
| Palld   | 4.12E-204 | -1.107 | 0.045 | 0.328 | 8.23E-200 | PA-1 |
| Gpc6    | 6.81E-202 | 0.766  | 0.992 | 0.958 | 1.36E-197 | PA-1 |
| Nid1    | 1.36E-199 | 0.790  | 0.946 | 0.841 | 2.71E-195 | PA-1 |
| Prkd1   | 2.24E-198 | -1.118 | 0.406 | 0.744 | 4.46E-194 | PA-1 |
| Emilin2 | 2.90E-198 | 1.033  | 0.701 | 0.381 | 5.79E-194 | PA-1 |
| Uap1    | 2.99E-198 | 1.135  | 0.761 | 0.483 | 5.97E-194 | PA-1 |
| Anxa1   | 8.89E-198 | 0.969  | 0.765 | 0.453 | 1.77E-193 | PA-1 |
| Dhrs3   | 8.93E-198 | -0.973 | 0.078 | 0.375 | 1.78E-193 | PA-1 |
| Gli2    | 1.37E-197 | -0.903 | 0.053 | 0.338 | 2.74E-193 | PA-1 |
| Meox2   | 1.99E-197 | -1.718 | 0.154 | 0.479 | 3.98E-193 | PA-1 |

|          |           |        |       |       |           |      |
|----------|-----------|--------|-------|-------|-----------|------|
| Acvr2a   | 1.64E-196 | -1.226 | 0.345 | 0.67  | 3.28E-192 | PA-1 |
| Myo1d    | 4.39E-195 | -0.946 | 0.014 | 0.253 | 8.76E-191 | PA-1 |
| Frmd4b   | 4.53E-195 | -1.201 | 0.473 | 0.77  | 9.04E-191 | PA-1 |
| Smoc2    | 1.91E-194 | -1.387 | 0.206 | 0.529 | 3.81E-190 | PA-1 |
| Sgcd     | 1.93E-194 | -1.291 | 0.418 | 0.749 | 3.85E-190 | PA-1 |
| Kif2a    | 7.62E-191 | 0.997  | 0.762 | 0.487 | 1.52E-186 | PA-1 |
| Reps2    | 4.18E-188 | -1.030 | 0.187 | 0.522 | 8.35E-184 | PA-1 |
| Ntn4     | 7.57E-188 | 1.169  | 0.627 | 0.29  | 1.51E-183 | PA-1 |
| Cacna1c  | 1.98E-186 | -1.223 | 0.118 | 0.427 | 3.95E-182 | PA-1 |
| Pcolce2  | 9.02E-186 | 1.015  | 0.781 | 0.504 | 1.80E-181 | PA-1 |
| Nr1h4    | 9.31E-186 | 1.301  | 0.536 | 0.205 | 1.86E-181 | PA-1 |
| Cped1    | 5.63E-185 | -0.769 | 0.89  | 0.97  | 1.12E-180 | PA-1 |
| Cd9      | 1.41E-184 | -1.019 | 0.106 | 0.404 | 2.81E-180 | PA-1 |
| Lifr     | 6.86E-183 | -0.880 | 0.031 | 0.276 | 1.37E-178 | PA-1 |
| Ugdh     | 1.80E-182 | 1.098  | 0.696 | 0.38  | 3.59E-178 | PA-1 |
| Col14a1  | 2.31E-182 | 0.930  | 0.899 | 0.666 | 4.61E-178 | PA-1 |
| Col5a3   | 1.86E-181 | -1.297 | 0.371 | 0.662 | 3.71E-177 | PA-1 |
| Mme      | 2.14E-181 | -1.030 | 0.042 | 0.298 | 4.26E-177 | PA-1 |
| Prkca    | 9.54E-180 | 0.742  | 0.956 | 0.848 | 1.90E-175 | PA-1 |
| Clip1    | 1.95E-178 | 0.870  | 0.818 | 0.594 | 3.88E-174 | PA-1 |
| Bmp6     | 5.06E-176 | 1.323  | 0.471 | 0.141 | 1.01E-171 | PA-1 |
| Smpd3    | 2.30E-175 | 1.275  | 0.688 | 0.362 | 4.59E-171 | PA-1 |
| Mgll     | 5.61E-175 | 0.826  | 0.551 | 0.209 | 1.12E-170 | PA-1 |
| Tgfbr2   | 1.76E-174 | 0.844  | 0.85  | 0.662 | 3.52E-170 | PA-1 |
| Prickle1 | 1.14E-173 | -1.429 | 0.277 | 0.59  | 2.27E-169 | PA-1 |
| Marcks   | 2.15E-172 | 1.128  | 0.71  | 0.434 | 4.29E-168 | PA-1 |
| Utrn     | 5.56E-172 | 0.606  | 0.977 | 0.931 | 1.11E-167 | PA-1 |
| Ltbp1    | 2.52E-170 | 0.742  | 0.922 | 0.759 | 5.04E-166 | PA-1 |
| Angpt1   | 2.57E-170 | -1.188 | 0.287 | 0.614 | 5.13E-166 | PA-1 |
| Pdgfc    | 3.24E-170 | 1.127  | 0.609 | 0.278 | 6.46E-166 | PA-1 |
| Adamts12 | 1.00E-168 | -1.141 | 0.792 | 0.914 | 2.00E-164 | PA-1 |
| Mmp3     | 9.65E-168 | -1.337 | 0.093 | 0.373 | 1.93E-163 | PA-1 |
| Pdzd2    | 2.16E-166 | 1.016  | 0.691 | 0.406 | 4.31E-162 | PA-1 |
| Plxdc2   | 3.11E-166 | 0.632  | 0.989 | 0.912 | 6.20E-162 | PA-1 |
| Arhgap24 | 3.62E-165 | -0.924 | 0.868 | 0.954 | 7.22E-161 | PA-1 |
| Scara5   | 4.65E-165 | 0.741  | 0.92  | 0.723 | 9.28E-161 | PA-1 |
| Syt12    | 5.91E-165 | 1.017  | 0.401 | 0.097 | 1.18E-160 | PA-1 |
| Podn     | 8.23E-164 | -0.880 | 0.122 | 0.409 | 1.64E-159 | PA-1 |
| Enpp2    | 1.29E-162 | -1.347 | 0.085 | 0.349 | 2.57E-158 | PA-1 |
| Robo1    | 1.77E-162 | 1.216  | 0.685 | 0.387 | 3.54E-158 | PA-1 |
| Rasa3    | 5.80E-162 | -0.892 | 0.103 | 0.385 | 1.16E-157 | PA-1 |
| mt-Co2   | 6.53E-162 | -0.830 | 0.923 | 0.983 | 1.30E-157 | PA-1 |
| B3galt1  | 1.41E-161 | -1.041 | 0.469 | 0.762 | 2.82E-157 | PA-1 |
| Flnb     | 1.66E-159 | 0.845  | 0.751 | 0.477 | 3.31E-155 | PA-1 |
| Tiam2    | 5.54E-159 | -0.852 | 0.034 | 0.259 | 1.11E-154 | PA-1 |
| Ltbp4    | 6.47E-159 | -1.204 | 0.169 | 0.451 | 1.29E-154 | PA-1 |
| Col3a1   | 1.10E-157 | -1.119 | 0.973 | 0.985 | 2.20E-153 | PA-1 |
| Col6a2   | 5.36E-157 | -1.003 | 0.48  | 0.72  | 1.07E-152 | PA-1 |
| Slc43a3  | 1.30E-156 | 0.774  | 0.913 | 0.786 | 2.60E-152 | PA-1 |
| Sept11   | 1.45E-155 | -0.968 | 0.234 | 0.534 | 2.89E-151 | PA-1 |
| Lims2    | 3.78E-153 | 0.855  | 0.724 | 0.466 | 7.54E-149 | PA-1 |
| Vgll3    | 1.04E-152 | 0.924  | 0.766 | 0.495 | 2.07E-148 | PA-1 |
| Arhgef28 | 3.47E-152 | 0.914  | 0.736 | 0.473 | 6.92E-148 | PA-1 |
| mt-Atp6  | 5.42E-152 | -0.804 | 0.933 | 0.988 | 1.08E-147 | PA-1 |
| mt-Co3   | 9.14E-152 | -0.788 | 0.933 | 0.99  | 1.82E-147 | PA-1 |
| Myo1e    | 1.27E-151 | 0.880  | 0.665 | 0.365 | 2.54E-147 | PA-1 |
| Gsn      | 5.09E-151 | -1.382 | 0.882 | 0.953 | 1.02E-146 | PA-1 |
| mt-Nd1   | 3.27E-150 | -0.774 | 0.876 | 0.973 | 6.52E-146 | PA-1 |
| Gucy1a2  | 1.37E-149 | -1.083 | 0.16  | 0.449 | 2.73E-145 | PA-1 |
| Klf12    | 9.19E-149 | 0.947  | 0.759 | 0.505 | 1.83E-144 | PA-1 |
| Pdgfd    | 3.88E-148 | 0.881  | 0.879 | 0.694 | 7.74E-144 | PA-1 |
| Adamts11 | 1.05E-147 | 0.808  | 0.952 | 0.823 | 2.10E-143 | PA-1 |

|            |           |        |       |       |           |      |
|------------|-----------|--------|-------|-------|-----------|------|
| Sestd1     | 2.02E-147 | 0.867  | 0.745 | 0.521 | 4.04E-143 | PA-1 |
| Heg1       | 3.67E-147 | 0.663  | 0.978 | 0.926 | 7.33E-143 | PA-1 |
| Tspan5     | 5.03E-147 | 0.650  | 0.957 | 0.89  | 1.00E-142 | PA-1 |
| Trim30d    | 1.24E-144 | 1.033  | 0.489 | 0.201 | 2.48E-140 | PA-1 |
| Stxbp5     | 2.49E-144 | 0.882  | 0.778 | 0.57  | 4.97E-140 | PA-1 |
| Fstl1      | 7.58E-144 | 0.565  | 0.981 | 0.936 | 1.51E-139 | PA-1 |
| Cacna2d1   | 5.83E-142 | -0.881 | 0.591 | 0.813 | 1.16E-137 | PA-1 |
| Spsb1      | 1.09E-140 | 0.910  | 0.62  | 0.339 | 2.17E-136 | PA-1 |
| Gpr1       | 2.33E-140 | 0.953  | 0.296 | 0.044 | 4.65E-136 | PA-1 |
| Rras2      | 3.50E-140 | 0.992  | 0.559 | 0.264 | 6.98E-136 | PA-1 |
| Pdzrn3     | 6.47E-140 | -1.080 | 0.183 | 0.461 | 1.29E-135 | PA-1 |
| Setbp1     | 2.30E-139 | -0.805 | 0.775 | 0.899 | 4.60E-135 | PA-1 |
| Dtna       | 1.11E-138 | 1.028  | 0.308 | 0.053 | 2.21E-134 | PA-1 |
| mt-Co1     | 3.15E-138 | -0.733 | 0.944 | 0.989 | 6.28E-134 | PA-1 |
| mt-Nd4     | 4.96E-137 | -0.744 | 0.87  | 0.969 | 9.90E-133 | PA-1 |
| Nfia       | 7.39E-137 | -0.650 | 0.973 | 0.99  | 1.47E-132 | PA-1 |
| Csgalnact1 | 1.98E-135 | -1.035 | 0.301 | 0.589 | 3.96E-131 | PA-1 |
| Kalrn      | 3.03E-134 | -0.977 | 0.044 | 0.251 | 6.04E-130 | PA-1 |
| Boc        | 4.12E-134 | -1.002 | 0.26  | 0.536 | 8.23E-130 | PA-1 |
| Rora       | 5.32E-134 | -0.676 | 0.972 | 0.986 | 1.06E-129 | PA-1 |
| Psd3       | 7.41E-134 | 0.646  | 0.954 | 0.836 | 1.48E-129 | PA-1 |
| Inmt       | 1.43E-133 | -1.118 | 0.077 | 0.308 | 2.86E-129 | PA-1 |
| Adra1b     | 6.42E-133 | 0.918  | 0.344 | 0.083 | 1.28E-128 | PA-1 |
| mt-Nd5     | 3.23E-131 | -0.751 | 0.707 | 0.898 | 6.45E-127 | PA-1 |
| mt-Cytb    | 1.33E-129 | -0.746 | 0.891 | 0.977 | 2.65E-125 | PA-1 |
| Adam33     | 2.52E-129 | 0.860  | 0.721 | 0.491 | 5.03E-125 | PA-1 |
| mt-Nd2     | 7.37E-128 | -0.705 | 0.861 | 0.967 | 1.47E-123 | PA-1 |
| Il18       | 1.80E-127 | 0.853  | 0.418 | 0.149 | 3.60E-123 | PA-1 |
| mt-Nd4l    | 1.70E-126 | -0.764 | 0.675 | 0.875 | 3.39E-122 | PA-1 |
| Antxr1     | 3.06E-126 | 0.602  | 0.921 | 0.802 | 6.11E-122 | PA-1 |
| Basp1      | 3.32E-125 | 0.892  | 0.483 | 0.209 | 6.62E-121 | PA-1 |
| Plpp3      | 3.77E-124 | 0.806  | 0.916 | 0.829 | 7.52E-120 | PA-1 |
| Cp         | 6.80E-123 | -0.946 | 0.109 | 0.344 | 1.36E-118 | PA-1 |
| Lama2      | 1.12E-122 | -0.694 | 0.974 | 0.976 | 2.23E-118 | PA-1 |
| Tox        | 1.54E-122 | -0.887 | 0.054 | 0.258 | 3.08E-118 | PA-1 |
| Chst1      | 1.75E-122 | 0.713  | 0.269 | 0.043 | 3.49E-118 | PA-1 |
| Thbd       | 2.04E-122 | 0.897  | 0.382 | 0.126 | 4.08E-118 | PA-1 |
| Tmem100    | 2.20E-122 | 0.885  | 0.46  | 0.191 | 4.40E-118 | PA-1 |
| Apbb2      | 2.45E-122 | 0.601  | 0.917 | 0.801 | 4.89E-118 | PA-1 |
| Vcan       | 1.96E-121 | 0.768  | 0.788 | 0.552 | 3.91E-117 | PA-1 |
| Ppp2r2b    | 5.40E-121 | 0.979  | 0.545 | 0.257 | 1.08E-116 | PA-1 |
| Plce1      | 1.17E-120 | 0.613  | 0.943 | 0.842 | 2.33E-116 | PA-1 |
| Adam23     | 1.35E-120 | -1.032 | 0.214 | 0.474 | 2.70E-116 | PA-1 |
| Procr      | 1.51E-120 | 0.905  | 0.449 | 0.188 | 3.01E-116 | PA-1 |
| Tgfb1      | 8.25E-119 | -0.793 | 0.056 | 0.254 | 1.65E-114 | PA-1 |
| Vegfc      | 1.83E-118 | -0.985 | 0.118 | 0.353 | 3.66E-114 | PA-1 |
| Fmo1       | 1.98E-117 | -1.012 | 0.169 | 0.414 | 3.95E-113 | PA-1 |
| Rhobtb1    | 4.48E-117 | -0.720 | 0.084 | 0.303 | 8.94E-113 | PA-1 |
| Dcbld2     | 4.43E-116 | 0.696  | 0.792 | 0.592 | 8.84E-112 | PA-1 |
| Ablim1     | 2.06E-114 | 0.554  | 0.943 | 0.834 | 4.11E-110 | PA-1 |
| Cyp1b1     | 2.09E-114 | -0.634 | 0.059 | 0.259 | 4.18E-110 | PA-1 |
| Prss23     | 4.77E-114 | 0.944  | 0.539 | 0.298 | 9.52E-110 | PA-1 |
| Smurf1     | 7.45E-114 | 0.793  | 0.675 | 0.451 | 1.49E-109 | PA-1 |
| Maml3      | 1.42E-113 | -0.784 | 0.502 | 0.742 | 2.83E-109 | PA-1 |
| Pde7a      | 2.74E-113 | 0.735  | 0.603 | 0.334 | 5.47E-109 | PA-1 |
| Itpr1      | 2.79E-112 | -0.828 | 0.217 | 0.473 | 5.56E-108 | PA-1 |
| Prr16      | 2.87E-112 | -0.971 | 0.121 | 0.354 | 5.73E-108 | PA-1 |
| Eda        | 4.81E-111 | -0.931 | 0.456 | 0.711 | 9.60E-107 | PA-1 |
| Fign       | 8.93E-110 | -0.806 | 0.126 | 0.361 | 1.78E-105 | PA-1 |
| Fnbp1      | 1.19E-109 | -0.740 | 0.293 | 0.556 | 2.38E-105 | PA-1 |
| Rhoq       | 1.85E-109 | 0.742  | 0.692 | 0.49  | 3.70E-105 | PA-1 |
| Timp2      | 2.41E-109 | 0.970  | 0.754 | 0.569 | 4.81E-105 | PA-1 |

|          |           |        |       |       |           |      |
|----------|-----------|--------|-------|-------|-----------|------|
| Atp10d   | 1.52E-108 | -0.763 | 0.108 | 0.324 | 3.04E-104 | PA-1 |
| Dact1    | 1.90E-108 | 0.819  | 0.461 | 0.214 | 3.79E-104 | PA-1 |
| Cd47     | 1.16E-107 | 0.633  | 0.786 | 0.662 | 2.31E-103 | PA-1 |
| Nxn      | 2.41E-107 | -0.833 | 0.067 | 0.265 | 4.82E-103 | PA-1 |
| Wnt2     | 1.22E-106 | 0.810  | 0.342 | 0.108 | 2.43E-102 | PA-1 |
| Klf4     | 1.13E-105 | 0.809  | 0.6   | 0.371 | 2.25E-101 | PA-1 |
| Trps1    | 1.35E-105 | -0.939 | 0.127 | 0.348 | 2.70E-101 | PA-1 |
| Iqsec1   | 8.02E-105 | 0.762  | 0.552 | 0.315 | 1.60E-100 | PA-1 |
| Eya4     | 1.12E-104 | 0.964  | 0.524 | 0.27  | 2.23E-100 | PA-1 |
| mt-Rnr2  | 2.91E-104 | -0.654 | 0.869 | 0.972 | 5.81E-100 | PA-1 |
| Klf2     | 4.68E-104 | 0.789  | 0.414 | 0.17  | 9.33E-100 | PA-1 |
| Ext1     | 8.19E-104 | 0.618  | 0.976 | 0.936 | 1.64E-99  | PA-1 |
| Sntg1    | 8.70E-104 | 1.577  | 0.55  | 0.324 | 1.74E-99  | PA-1 |
| Sema3d   | 8.80E-104 | 0.769  | 0.483 | 0.214 | 1.76E-99  | PA-1 |
| Nrip1    | 1.10E-103 | -0.751 | 0.688 | 0.828 | 2.20E-99  | PA-1 |
| Hivep2   | 1.40E-102 | 0.551  | 0.95  | 0.892 | 2.79E-98  | PA-1 |
| Plod1    | 1.79E-102 | -0.564 | 0.064 | 0.252 | 3.56E-98  | PA-1 |
| Cd34     | 1.85E-101 | 0.616  | 0.792 | 0.626 | 3.68E-97  | PA-1 |
| Dpt      | 4.54E-101 | 0.892  | 0.766 | 0.583 | 9.05E-97  | PA-1 |
| Metrn1   | 5.42E-101 | 0.747  | 0.359 | 0.134 | 1.08E-96  | PA-1 |
| Mycbp2   | 5.61E-101 | -0.602 | 0.736 | 0.872 | 1.12E-96  | PA-1 |
| Rab31    | 7.97E-101 | -0.659 | 0.125 | 0.344 | 1.59E-96  | PA-1 |
| Rin3     | 8.67E-101 | 0.727  | 0.365 | 0.131 | 1.73E-96  | PA-1 |
| Nptn     | 1.24E-100 | 0.642  | 0.815 | 0.686 | 2.47E-96  | PA-1 |
| Cygb     | 4.66E-100 | -0.799 | 0.151 | 0.366 | 9.29E-96  | PA-1 |
| Slc24a3  | 5.57E-100 | -1.122 | 0.186 | 0.413 | 1.11E-95  | PA-1 |
| Aff3     | 1.72E-99  | -0.841 | 0.338 | 0.571 | 3.43E-95  | PA-1 |
| Wnt5b    | 1.20E-98  | 0.887  | 0.301 | 0.088 | 2.39E-94  | PA-1 |
| Pcolce   | 2.94E-98  | -0.727 | 0.269 | 0.512 | 5.87E-94  | PA-1 |
| Raph1    | 3.36E-98  | -0.713 | 0.403 | 0.631 | 6.71E-94  | PA-1 |
| Abca5    | 4.06E-98  | 0.745  | 0.448 | 0.211 | 8.10E-94  | PA-1 |
| Fgfr1    | 2.84E-97  | 0.594  | 0.829 | 0.7   | 5.66E-93  | PA-1 |
| Pamr1    | 3.93E-97  | 0.726  | 0.639 | 0.411 | 7.85E-93  | PA-1 |
| Tbc1d12  | 4.56E-97  | 0.719  | 0.667 | 0.464 | 9.11E-93  | PA-1 |
| Ifi207   | 1.10E-96  | -0.723 | 0.527 | 0.727 | 2.20E-92  | PA-1 |
| Nalcn    | 1.61E-96  | -0.890 | 0.097 | 0.295 | 3.21E-92  | PA-1 |
| Ghr      | 2.29E-96  | -0.851 | 0.835 | 0.916 | 4.57E-92  | PA-1 |
| Glce     | 2.53E-96  | 0.805  | 0.535 | 0.306 | 5.05E-92  | PA-1 |
| Arhgap42 | 3.57E-95  | 0.616  | 0.892 | 0.794 | 7.13E-91  | PA-1 |
| Dbn1     | 9.70E-95  | 0.718  | 0.492 | 0.264 | 1.94E-90  | PA-1 |
| Lrrfip1  | 3.32E-94  | -0.614 | 0.121 | 0.332 | 6.64E-90  | PA-1 |
| Zeb1     | 3.77E-94  | 0.513  | 0.97  | 0.935 | 7.53E-90  | PA-1 |
| Man1c1   | 2.87E-93  | -0.672 | 0.269 | 0.505 | 5.74E-89  | PA-1 |
| Prkg2    | 4.91E-93  | 0.767  | 0.324 | 0.108 | 9.80E-89  | PA-1 |
| Arhgap6  | 8.98E-93  | -0.579 | 0.904 | 0.958 | 1.79E-88  | PA-1 |
| Map4k4   | 1.10E-92  | -0.578 | 0.665 | 0.829 | 2.20E-88  | PA-1 |
| Pcdh7    | 2.92E-92  | -0.705 | 0.787 | 0.894 | 5.83E-88  | PA-1 |
| Pitpnc1  | 1.68E-90  | -0.744 | 0.309 | 0.543 | 3.35E-86  | PA-1 |
| Map3k5   | 2.92E-90  | -0.690 | 0.369 | 0.592 | 5.83E-86  | PA-1 |
| Prex2    | 6.07E-90  | -0.776 | 0.362 | 0.597 | 1.21E-85  | PA-1 |
| Fam78b   | 4.15E-89  | -0.612 | 0.089 | 0.277 | 8.28E-85  | PA-1 |
| Bach2    | 4.15E-89  | 0.709  | 0.646 | 0.438 | 8.29E-85  | PA-1 |
| Flrt2    | 8.07E-89  | 0.693  | 0.878 | 0.775 | 1.61E-84  | PA-1 |
| Disp1    | 1.57E-88  | 0.688  | 0.591 | 0.369 | 3.14E-84  | PA-1 |
| Clip4    | 1.99E-88  | 0.676  | 0.395 | 0.172 | 3.98E-84  | PA-1 |
| Sh3kbp1  | 3.54E-88  | -0.673 | 0.223 | 0.443 | 7.07E-84  | PA-1 |
| Abca8a   | 4.16E-88  | -0.757 | 0.606 | 0.791 | 8.31E-84  | PA-1 |
| Gria4    | 4.23E-88  | -1.990 | 0.078 | 0.251 | 8.44E-84  | PA-1 |
| Gxylt2   | 4.38E-88  | -0.713 | 0.231 | 0.461 | 8.75E-84  | PA-1 |
| Pdgfrb   | 6.34E-88  | -0.693 | 0.199 | 0.411 | 1.27E-83  | PA-1 |
| Qpct     | 1.79E-87  | 0.661  | 0.307 | 0.105 | 3.57E-83  | PA-1 |
| Rreb1    | 4.50E-87  | -0.687 | 0.327 | 0.565 | 8.97E-83  | PA-1 |



|          |          |        |       |       |          |      |
|----------|----------|--------|-------|-------|----------|------|
| Igfbp6   | 4.91E-87 | 0.913  | 0.667 | 0.457 | 9.80E-83 | PA-1 |
| Wdr66    | 6.28E-87 | -0.635 | 0.088 | 0.272 | 1.25E-82 | PA-1 |
| Kcnk5    | 3.44E-86 | 0.646  | 0.252 | 0.064 | 6.86E-82 | PA-1 |
| Cd248    | 6.40E-86 | 0.844  | 0.56  | 0.354 | 1.28E-81 | PA-1 |
| Col6a1   | 8.96E-86 | -0.734 | 0.422 | 0.63  | 1.79E-81 | PA-1 |
| Fhl1     | 9.17E-86 | 0.765  | 0.48  | 0.265 | 1.83E-81 | PA-1 |
| Entpd2   | 1.14E-85 | -0.701 | 0.219 | 0.427 | 2.28E-81 | PA-1 |
| Prickle2 | 8.49E-85 | -0.779 | 0.261 | 0.482 | 1.70E-80 | PA-1 |
| Jazf1    | 2.34E-84 | -0.764 | 0.157 | 0.361 | 4.67E-80 | PA-1 |
| Daglb    | 2.54E-84 | 0.845  | 0.433 | 0.221 | 5.06E-80 | PA-1 |
| Pid1     | 3.04E-84 | -0.931 | 0.714 | 0.827 | 6.07E-80 | PA-1 |
| Pten     | 9.42E-84 | -0.769 | 0.556 | 0.717 | 1.88E-79 | PA-1 |
| Col1a1   | 1.10E-83 | -1.079 | 0.729 | 0.847 | 2.20E-79 | PA-1 |
| Tep1     | 3.19E-83 | -0.534 | 0.101 | 0.284 | 6.37E-79 | PA-1 |
| Abi3bp   | 4.94E-83 | -0.775 | 0.807 | 0.875 | 9.86E-79 | PA-1 |
| Rad51b   | 5.80E-83 | -0.726 | 0.531 | 0.733 | 1.16E-78 | PA-1 |
| Ppp3ca   | 2.29E-82 | -0.562 | 0.744 | 0.876 | 4.57E-78 | PA-1 |
| Cfh      | 2.61E-82 | -0.903 | 0.164 | 0.363 | 5.21E-78 | PA-1 |
| Rhoa     | 1.14E-81 | 0.541  | 0.718 | 0.506 | 2.28E-77 | PA-1 |
| Mtus1    | 2.05E-81 | -0.625 | 0.22  | 0.438 | 4.09E-77 | PA-1 |
| Gnb4     | 2.19E-81 | -0.524 | 0.084 | 0.259 | 4.38E-77 | PA-1 |
| Mbnl1    | 7.76E-81 | -0.607 | 0.801 | 0.877 | 1.55E-76 | PA-1 |
| Myh9     | 2.02E-80 | -0.624 | 0.167 | 0.367 | 4.04E-76 | PA-1 |
| Sh3rf3   | 2.04E-80 | -0.661 | 0.208 | 0.426 | 4.07E-76 | PA-1 |
| Edn1     | 6.99E-80 | 0.715  | 0.282 | 0.092 | 1.40E-75 | PA-1 |
| Cacna1a  | 7.35E-80 | -0.657 | 0.402 | 0.621 | 1.47E-75 | PA-1 |
| Il1rl2   | 3.06E-79 | 0.650  | 0.751 | 0.581 | 6.12E-75 | PA-1 |
| Jpt1     | 4.27E-79 | 0.625  | 0.412 | 0.201 | 8.53E-75 | PA-1 |
| Cyth3    | 4.51E-79 | -0.769 | 0.509 | 0.695 | 9.00E-75 | PA-1 |
| Il11ra1  | 9.33E-79 | -0.605 | 0.13  | 0.314 | 1.86E-74 | PA-1 |
| Dock11   | 1.07E-78 | 0.600  | 0.741 | 0.576 | 2.14E-74 | PA-1 |
| Fbxl7    | 1.15E-78 | 0.652  | 0.863 | 0.755 | 2.30E-74 | PA-1 |
| Myof     | 2.08E-78 | 0.548  | 0.803 | 0.66  | 4.15E-74 | PA-1 |
| Zyx      | 6.70E-78 | 0.620  | 0.359 | 0.158 | 1.34E-73 | PA-1 |
| Islr2    | 3.98E-77 | 0.584  | 0.283 | 0.097 | 7.95E-73 | PA-1 |
| Colec12  | 7.89E-77 | -0.739 | 0.348 | 0.562 | 1.57E-72 | PA-1 |
| Ptgis    | 1.28E-76 | 0.591  | 0.386 | 0.177 | 2.56E-72 | PA-1 |
| Phlpp1   | 1.90E-76 | 0.608  | 0.769 | 0.617 | 3.79E-72 | PA-1 |
| Slc41a2  | 2.51E-76 | -0.556 | 0.222 | 0.44  | 5.01E-72 | PA-1 |
| Tcf4     | 6.18E-76 | -0.640 | 0.869 | 0.912 | 1.23E-71 | PA-1 |
| Fez1     | 2.64E-75 | 0.570  | 0.287 | 0.101 | 5.27E-71 | PA-1 |
| Lrp6     | 3.29E-75 | -0.581 | 0.641 | 0.783 | 6.56E-71 | PA-1 |
| Plcl1    | 5.83E-74 | -0.663 | 0.525 | 0.72  | 1.16E-69 | PA-1 |
| Pcdh9    | 8.08E-74 | 0.940  | 0.614 | 0.417 | 1.61E-69 | PA-1 |
| Chst11   | 1.09E-73 | -0.594 | 0.095 | 0.265 | 2.17E-69 | PA-1 |
| C7       | 2.26E-73 | -1.803 | 0.394 | 0.553 | 4.52E-69 | PA-1 |
| Notch2   | 4.12E-73 | 0.593  | 0.628 | 0.453 | 8.22E-69 | PA-1 |
| Slc7a6   | 4.34E-73 | 0.644  | 0.515 | 0.315 | 8.66E-69 | PA-1 |
| Gnpnat1  | 5.05E-73 | 0.554  | 0.285 | 0.102 | 1.01E-68 | PA-1 |
| Bcl2     | 1.18E-72 | -0.708 | 0.22  | 0.418 | 2.36E-68 | PA-1 |
| Fam20a   | 1.59E-72 | 0.620  | 0.608 | 0.411 | 3.16E-68 | PA-1 |
| Atp2b1   | 1.84E-72 | 0.506  | 0.779 | 0.617 | 3.66E-68 | PA-1 |
| Mtcl1    | 2.56E-72 | 0.586  | 0.267 | 0.091 | 5.10E-68 | PA-1 |
| Emp1     | 2.91E-72 | -0.651 | 0.249 | 0.447 | 5.81E-68 | PA-1 |
| Vit      | 4.96E-72 | -0.682 | 0.126 | 0.306 | 9.89E-68 | PA-1 |
| Asap2    | 1.45E-71 | 0.560  | 0.688 | 0.514 | 2.90E-67 | PA-1 |
| Sh3pxd2a | 1.75E-71 | -0.518 | 0.126 | 0.308 | 3.48E-67 | PA-1 |
| Egfr     | 1.43E-70 | -0.561 | 0.966 | 0.972 | 2.85E-66 | PA-1 |
| Apbb1ip  | 3.48E-70 | -0.620 | 0.634 | 0.78  | 6.95E-66 | PA-1 |
| Gm44080  | 5.53E-70 | 0.619  | 0.295 | 0.114 | 1.10E-65 | PA-1 |
| Aig1     | 1.16E-69 | 0.652  | 0.601 | 0.41  | 2.32E-65 | PA-1 |
| mt-Nd6   | 1.49E-69 | -0.598 | 0.349 | 0.563 | 2.97E-65 | PA-1 |

|              |          |        |       |       |          |      |
|--------------|----------|--------|-------|-------|----------|------|
| Dock9        | 3.43E-69 | -0.706 | 0.395 | 0.594 | 6.85E-65 | PA-1 |
| Sema5a       | 3.85E-69 | -0.738 | 0.134 | 0.309 | 7.68E-65 | PA-1 |
| Cers6        | 3.80E-68 | 0.592  | 0.615 | 0.438 | 7.59E-64 | PA-1 |
| Atp6v0a1     | 8.49E-68 | -0.566 | 0.227 | 0.419 | 1.69E-63 | PA-1 |
| St5          | 1.59E-67 | -0.607 | 0.382 | 0.582 | 3.17E-63 | PA-1 |
| Cask         | 1.82E-67 | 0.553  | 0.802 | 0.692 | 3.63E-63 | PA-1 |
| Cadm3        | 3.39E-67 | 0.664  | 0.419 | 0.231 | 6.77E-63 | PA-1 |
| Ism1         | 1.09E-66 | -0.950 | 0.099 | 0.257 | 2.18E-62 | PA-1 |
| Adh1         | 1.40E-66 | -0.660 | 0.106 | 0.266 | 2.80E-62 | PA-1 |
| Lmx1a        | 2.31E-66 | 0.647  | 0.376 | 0.184 | 4.61E-62 | PA-1 |
| Galnt17      | 4.25E-66 | -0.667 | 0.473 | 0.663 | 8.48E-62 | PA-1 |
| Gpm6b        | 6.56E-66 | -0.778 | 0.204 | 0.392 | 1.31E-61 | PA-1 |
| C3           | 6.80E-66 | 0.802  | 0.637 | 0.445 | 1.36E-61 | PA-1 |
| Arhgap32     | 6.81E-66 | -0.544 | 0.419 | 0.619 | 1.36E-61 | PA-1 |
| Adamts14     | 7.14E-66 | 0.585  | 0.369 | 0.185 | 1.43E-61 | PA-1 |
| Thrb         | 8.17E-66 | -0.625 | 0.49  | 0.672 | 1.63E-61 | PA-1 |
| Irak3        | 2.01E-65 | 0.571  | 0.629 | 0.454 | 4.01E-61 | PA-1 |
| Scara3       | 4.35E-65 | 0.595  | 0.478 | 0.293 | 8.69E-61 | PA-1 |
| Cpne8        | 1.89E-64 | 0.549  | 0.74  | 0.568 | 3.77E-60 | PA-1 |
| 1700019D03Ri | 2.30E-64 | 0.594  | 0.341 | 0.16  | 4.59E-60 | PA-1 |
| Slc9a9       | 2.56E-64 | -0.632 | 0.455 | 0.651 | 5.11E-60 | PA-1 |
| Lvrn         | 8.35E-64 | 0.699  | 0.635 | 0.45  | 1.67E-59 | PA-1 |
| Il6ra        | 1.27E-63 | 0.601  | 0.572 | 0.39  | 2.54E-59 | PA-1 |
| Lrrn4cl      | 3.60E-63 | 0.540  | 0.287 | 0.117 | 7.20E-59 | PA-1 |
| Srpx         | 6.91E-63 | -0.537 | 0.106 | 0.261 | 1.38E-58 | PA-1 |
| Atxn1        | 1.33E-62 | -0.605 | 0.525 | 0.689 | 2.66E-58 | PA-1 |
| Mylip        | 2.88E-62 | 0.565  | 0.29  | 0.12  | 5.75E-58 | PA-1 |
| Tbx15        | 3.28E-62 | -0.553 | 0.64  | 0.785 | 6.55E-58 | PA-1 |
| Zdhhc14      | 5.65E-62 | -0.604 | 0.238 | 0.423 | 1.13E-57 | PA-1 |
| Ugp2         | 1.12E-61 | 0.610  | 0.684 | 0.54  | 2.24E-57 | PA-1 |
| Arhgap18     | 1.24E-61 | -0.579 | 0.312 | 0.512 | 2.47E-57 | PA-1 |
| Pik3r1       | 2.20E-61 | -0.543 | 0.643 | 0.782 | 4.39E-57 | PA-1 |
| mt-Nd3       | 2.20E-61 | -0.538 | 0.42  | 0.62  | 4.39E-57 | PA-1 |
| Igfbp4       | 5.21E-61 | 0.627  | 0.516 | 0.334 | 1.04E-56 | PA-1 |
| Sned1        | 1.02E-60 | -0.853 | 0.254 | 0.433 | 2.04E-56 | PA-1 |
| St3gal4      | 6.16E-60 | -0.534 | 0.235 | 0.421 | 1.23E-55 | PA-1 |
| Megf9        | 6.80E-60 | 0.558  | 0.57  | 0.391 | 1.36E-55 | PA-1 |
| Jag1         | 7.21E-60 | 0.669  | 0.467 | 0.294 | 1.44E-55 | PA-1 |
| Slc16a9      | 2.43E-59 | 0.688  | 0.402 | 0.228 | 4.86E-55 | PA-1 |
| Rpl13        | 3.56E-59 | 1.278  | 0.269 | 0.11  | 7.11E-55 | PA-1 |
| Ly6c1        | 3.89E-59 | 0.597  | 0.5   | 0.314 | 7.76E-55 | PA-1 |
| Itga11       | 7.78E-59 | 0.574  | 0.571 | 0.389 | 1.55E-54 | PA-1 |
| Snrk         | 7.82E-59 | -0.581 | 0.203 | 0.377 | 1.56E-54 | PA-1 |
| Dennd4a      | 3.12E-58 | -0.738 | 0.39  | 0.564 | 6.22E-54 | PA-1 |
| Phldb2       | 5.43E-58 | -0.619 | 0.378 | 0.56  | 1.08E-53 | PA-1 |
| Abca6        | 7.27E-58 | 0.550  | 0.635 | 0.473 | 1.45E-53 | PA-1 |
| Adam22       | 7.60E-58 | 0.629  | 0.398 | 0.216 | 1.52E-53 | PA-1 |
| Fam13c       | 7.89E-58 | 0.567  | 0.49  | 0.31  | 1.57E-53 | PA-1 |
| Adcy2        | 1.15E-57 | 0.629  | 0.488 | 0.304 | 2.30E-53 | PA-1 |
| Dab2         | 1.54E-57 | -0.608 | 0.224 | 0.401 | 3.07E-53 | PA-1 |
| Lrrc8b       | 1.65E-57 | 0.533  | 0.271 | 0.111 | 3.29E-53 | PA-1 |
| Micu1        | 2.87E-57 | 0.545  | 0.622 | 0.462 | 5.72E-53 | PA-1 |
| Arl4a        | 4.11E-57 | 0.571  | 0.483 | 0.312 | 8.21E-53 | PA-1 |
| Elmo1        | 5.14E-57 | -0.563 | 0.632 | 0.76  | 1.03E-52 | PA-1 |
| Gm33869      | 6.70E-57 | 0.533  | 0.515 | 0.334 | 1.34E-52 | PA-1 |
| Snx21        | 8.33E-57 | 0.569  | 0.346 | 0.177 | 1.66E-52 | PA-1 |
| Ly6a         | 1.06E-56 | 0.627  | 0.656 | 0.493 | 2.11E-52 | PA-1 |
| Msi2         | 1.77E-56 | 0.541  | 0.635 | 0.482 | 3.54E-52 | PA-1 |
| Col1a2       | 3.40E-56 | -0.676 | 0.934 | 0.956 | 6.79E-52 | PA-1 |
| Cdh13        | 1.60E-55 | -0.818 | 0.385 | 0.549 | 3.19E-51 | PA-1 |
| Adgrg6       | 5.69E-55 | 0.622  | 0.26  | 0.108 | 1.14E-50 | PA-1 |
| Plat         | 1.73E-54 | 0.597  | 0.469 | 0.307 | 3.46E-50 | PA-1 |

|          |           |        |       |       |           |      |
|----------|-----------|--------|-------|-------|-----------|------|
| Rapgef1  | 7.32E-54  | 0.504  | 0.636 | 0.499 | 1.46E-49  | PA-1 |
| Rps15    | 2.24E-53  | 0.907  | 0.347 | 0.186 | 4.48E-49  | PA-1 |
| Col12a1  | 3.67E-53  | 0.669  | 0.402 | 0.231 | 7.33E-49  | PA-1 |
| Kctd9    | 7.65E-53  | 0.537  | 0.491 | 0.322 | 1.53E-48  | PA-1 |
| Cdh9     | 1.57E-52  | 0.641  | 0.437 | 0.266 | 3.14E-48  | PA-1 |
| Gas1     | 1.93E-52  | -0.794 | 0.231 | 0.386 | 3.85E-48  | PA-1 |
| Bmp1     | 2.50E-52  | 0.510  | 0.66  | 0.539 | 4.99E-48  | PA-1 |
| Nckap5   | 4.09E-51  | -0.586 | 0.509 | 0.674 | 8.16E-47  | PA-1 |
| Rps8     | 6.78E-51  | 1.076  | 0.272 | 0.124 | 1.35E-46  | PA-1 |
| Nipal2   | 1.18E-50  | 0.583  | 0.423 | 0.251 | 2.35E-46  | PA-1 |
| Eef1a1   | 1.72E-50  | 1.110  | 0.273 | 0.125 | 3.43E-46  | PA-1 |
| Plac8    | 1.24E-49  | 0.603  | 0.277 | 0.128 | 2.48E-45  | PA-1 |
| Chrdl1   | 3.94E-49  | -0.897 | 0.154 | 0.3   | 7.87E-45  | PA-1 |
| Tlr4     | 6.90E-49  | 0.564  | 0.567 | 0.42  | 1.38E-44  | PA-1 |
| Epb41l3  | 2.83E-48  | 0.534  | 0.473 | 0.31  | 5.65E-44  | PA-1 |
| Itga2    | 5.12E-48  | 0.550  | 0.265 | 0.123 | 1.02E-43  | PA-1 |
| Dlg2     | 8.35E-48  | 0.664  | 0.368 | 0.208 | 1.67E-43  | PA-1 |
| Irs1     | 8.80E-48  | -0.578 | 0.382 | 0.549 | 1.76E-43  | PA-1 |
| Ogn      | 9.28E-48  | 0.583  | 0.665 | 0.551 | 1.85E-43  | PA-1 |
| Nfkbiz   | 1.12E-47  | 0.561  | 0.266 | 0.123 | 2.24E-43  | PA-1 |
| Bicd1    | 1.47E-47  | 0.550  | 0.466 | 0.302 | 2.94E-43  | PA-1 |
| Magi1    | 2.30E-46  | -0.678 | 0.347 | 0.515 | 4.58E-42  | PA-1 |
| Man2a1   | 1.44E-45  | -0.536 | 0.785 | 0.853 | 2.88E-41  | PA-1 |
| Glp2r    | 1.66E-44  | 0.616  | 0.295 | 0.151 | 3.32E-40  | PA-1 |
| Rab38    | 2.32E-44  | 0.502  | 0.273 | 0.131 | 4.63E-40  | PA-1 |
| S100a11  | 1.16E-43  | 0.609  | 0.302 | 0.16  | 2.31E-39  | PA-1 |
| St6gal1  | 1.55E-43  | 0.530  | 0.409 | 0.258 | 3.10E-39  | PA-1 |
| Kitl     | 1.78E-43  | -0.540 | 0.26  | 0.418 | 3.56E-39  | PA-1 |
| Klf3     | 8.35E-43  | 0.514  | 0.555 | 0.426 | 1.67E-38  | PA-1 |
| Klhl29   | 1.30E-42  | 0.501  | 0.649 | 0.515 | 2.60E-38  | PA-1 |
| Aldh1a1  | 1.75E-42  | -0.623 | 0.742 | 0.815 | 3.50E-38  | PA-1 |
| Arid5b   | 7.21E-42  | -0.510 | 0.217 | 0.366 | 1.44E-37  | PA-1 |
| Xkr4     | 1.83E-41  | -0.673 | 0.239 | 0.389 | 3.65E-37  | PA-1 |
| Ccdc80   | 8.81E-41  | -0.545 | 0.617 | 0.743 | 1.76E-36  | PA-1 |
| Ptprk    | 3.91E-40  | -0.562 | 0.191 | 0.334 | 7.81E-36  | PA-1 |
| Adam19   | 4.34E-40  | -0.524 | 0.436 | 0.575 | 8.67E-36  | PA-1 |
| Fgf7     | 1.58E-39  | -0.524 | 0.249 | 0.402 | 3.16E-35  | PA-1 |
| Vegfd    | 1.29E-38  | 0.536  | 0.428 | 0.292 | 2.58E-34  | PA-1 |
| Hsp90ab1 | 2.27E-38  | 0.644  | 0.268 | 0.14  | 4.52E-34  | PA-1 |
| Ppp1r9a  | 3.50E-38  | 0.538  | 0.411 | 0.267 | 6.98E-34  | PA-1 |
| Kcnt2    | 2.17E-37  | -0.736 | 0.444 | 0.56  | 4.33E-33  | PA-1 |
| Parp8    | 1.12E-36  | 0.538  | 0.657 | 0.565 | 2.24E-32  | PA-1 |
| Il1r2    | 4.68E-36  | 0.635  | 0.26  | 0.139 | 9.33E-32  | PA-1 |
| Frmd4a   | 1.27E-35  | -0.511 | 0.265 | 0.404 | 2.53E-31  | PA-1 |
| Plcb1    | 2.02E-33  | -0.585 | 0.191 | 0.317 | 4.03E-29  | PA-1 |
| Rps21    | 6.80E-33  | 0.698  | 0.393 | 0.27  | 1.36E-28  | PA-1 |
| Selenop  | 1.31E-32  | -0.522 | 0.151 | 0.265 | 2.60E-28  | PA-1 |
| Fth1     | 3.18E-31  | 0.687  | 0.25  | 0.136 | 6.34E-27  | PA-1 |
| Rplp1    | 4.09E-29  | 0.854  | 0.266 | 0.157 | 8.17E-25  | PA-1 |
| Tmtc2    | 7.14E-29  | 0.698  | 0.356 | 0.241 | 1.42E-24  | PA-1 |
| Fbln1    | 1.33E-27  | -0.518 | 0.237 | 0.357 | 2.65E-23  | PA-1 |
| Rnf220   | 2.62E-27  | 0.645  | 0.304 | 0.2   | 5.22E-23  | PA-1 |
| Epha3    | 2.40E-20  | -0.590 | 0.314 | 0.41  | 4.80E-16  | PA-1 |
| Sult1e1  | 1.13E-13  | -0.528 | 0.197 | 0.271 | 2.25E-09  | PA-1 |
| Adam12.1 | 0         | 2.292  | 0.572 | 0.124 | 0         | PA-2 |
| Col4a1.1 | 0         | 1.810  | 0.858 | 0.359 | 0         | PA-2 |
| Bmper.1  | 8.05E-295 | 1.876  | 0.755 | 0.281 | 1.61E-290 | PA-2 |
| Col4a2.1 | 7.93E-286 | 1.625  | 0.756 | 0.282 | 1.58E-281 | PA-2 |
| Creb5.1  | 7.49E-260 | -1.572 | 0.768 | 0.933 | 1.49E-255 | PA-2 |
| Col6a3.1 | 6.41E-257 | 1.523  | 0.842 | 0.474 | 1.28E-252 | PA-2 |
| Pparg.1  | 6.73E-257 | 1.390  | 0.448 | 0.076 | 1.34E-252 | PA-2 |
| Col5a3.1 | 8.98E-248 | 1.537  | 0.792 | 0.405 | 1.79E-243 | PA-2 |

|              |           |        |       |       |           |      |
|--------------|-----------|--------|-------|-------|-----------|------|
| Pde11a.1     | 2.19E-244 | 2.160  | 0.471 | 0.098 | 4.37E-240 | PA-2 |
| Pi16.1       | 2.17E-242 | -1.940 | 0.4   | 0.815 | 4.33E-238 | PA-2 |
| Sema3c.1     | 1.23E-240 | -1.544 | 0.674 | 0.921 | 2.46E-236 | PA-2 |
| Anxa3.1      | 3.10E-240 | -1.534 | 0.604 | 0.873 | 6.18E-236 | PA-2 |
| Col15a1.1    | 1.41E-238 | 1.401  | 0.492 | 0.108 | 2.81E-234 | PA-2 |
| Sema3e.1     | 1.16E-237 | -2.267 | 0.194 | 0.676 | 2.31E-233 | PA-2 |
| Limch1.1     | 3.08E-230 | -1.782 | 0.297 | 0.737 | 6.14E-226 | PA-2 |
| Gria3.1      | 4.21E-227 | 1.429  | 0.718 | 0.279 | 8.40E-223 | PA-2 |
| Dpp4.1       | 9.36E-227 | -1.605 | 0.561 | 0.849 | 1.87E-222 | PA-2 |
| Enpp2.1      | 1.84E-221 | 1.687  | 0.474 | 0.114 | 3.68E-217 | PA-2 |
| Nav3.1       | 2.30E-204 | -1.847 | 0.724 | 0.866 | 4.60E-200 | PA-2 |
| Hmcn2.1      | 4.01E-194 | 1.493  | 0.623 | 0.228 | 8.00E-190 | PA-2 |
| Gfpt2.1      | 5.14E-189 | -1.383 | 0.537 | 0.838 | 1.03E-184 | PA-2 |
| Igfbp5.1     | 9.18E-189 | -2.118 | 0.305 | 0.706 | 1.83E-184 | PA-2 |
| Auts2.1      | 3.62E-188 | 1.229  | 0.902 | 0.626 | 7.23E-184 | PA-2 |
| Ldb2.1       | 4.11E-179 | 1.197  | 0.651 | 0.257 | 8.20E-175 | PA-2 |
| Fam49a.1     | 3.74E-177 | 1.182  | 0.566 | 0.205 | 7.47E-173 | PA-2 |
| Opcml.1      | 2.16E-175 | -1.077 | 0.717 | 0.949 | 4.30E-171 | PA-2 |
| Smoc2.1      | 1.47E-173 | 1.354  | 0.615 | 0.26  | 2.93E-169 | PA-2 |
| Cd55.1       | 7.82E-169 | -1.458 | 0.441 | 0.746 | 1.56E-164 | PA-2 |
| Sparcl1.1    | 1.41E-168 | 0.990  | 0.383 | 0.086 | 2.81E-164 | PA-2 |
| Rora.1       | 5.32E-164 | 0.830  | 0.996 | 0.973 | 1.06E-159 | PA-2 |
| Mme.1        | 7.97E-163 | 1.100  | 0.369 | 0.084 | 1.59E-158 | PA-2 |
| Ston2.1      | 1.77E-162 | -1.436 | 0.311 | 0.678 | 3.53E-158 | PA-2 |
| Efemp1.1     | 2.86E-162 | -1.332 | 0.533 | 0.801 | 5.70E-158 | PA-2 |
| Cmah.1       | 1.17E-161 | -1.506 | 0.317 | 0.682 | 2.33E-157 | PA-2 |
| Slco3a1.1    | 5.41E-160 | -1.054 | 0.62  | 0.873 | 1.08E-155 | PA-2 |
| Nrep.1       | 5.74E-159 | 1.209  | 0.521 | 0.189 | 1.14E-154 | PA-2 |
| Frmd4b.1     | 2.40E-155 | 1.072  | 0.832 | 0.527 | 4.79E-151 | PA-2 |
| Csgalnact1.1 | 2.74E-154 | 1.226  | 0.692 | 0.342 | 5.47E-150 | PA-2 |
| Lpl.1        | 1.21E-153 | 1.247  | 0.378 | 0.092 | 2.42E-149 | PA-2 |
| Fbn1.1       | 6.49E-151 | -1.065 | 0.954 | 0.981 | 1.29E-146 | PA-2 |
| Gask1b.1     | 7.03E-151 | 1.116  | 0.546 | 0.208 | 1.40E-146 | PA-2 |
| Efna5.1      | 1.55E-148 | -1.641 | 0.343 | 0.668 | 3.10E-144 | PA-2 |
| Scara5.1     | 4.81E-148 | -0.937 | 0.649 | 0.893 | 9.60E-144 | PA-2 |
| Bgn.1        | 1.08E-147 | 1.042  | 0.621 | 0.259 | 2.15E-143 | PA-2 |
| Col6a2.1     | 5.55E-146 | 1.049  | 0.786 | 0.519 | 1.11E-141 | PA-2 |
| Fgf10        | 5.28E-145 | 1.177  | 0.341 | 0.079 | 1.05E-140 | PA-2 |
| Nfia.1       | 2.86E-143 | 0.752  | 0.994 | 0.976 | 5.70E-139 | PA-2 |
| Efh1.1       | 4.60E-139 | -1.349 | 0.169 | 0.529 | 9.19E-135 | PA-2 |
| Cacna2d1.1   | 6.46E-137 | 0.989  | 0.861 | 0.631 | 1.29E-132 | PA-2 |
| Adam23.1     | 1.82E-136 | 1.263  | 0.564 | 0.252 | 3.63E-132 | PA-2 |
| Sgip1.1      | 1.25E-135 | 1.297  | 0.459 | 0.157 | 2.50E-131 | PA-2 |
| Vav3.1       | 9.08E-135 | 0.885  | 0.517 | 0.184 | 1.81E-130 | PA-2 |
| Negr1.1      | 3.16E-134 | -1.611 | 0.302 | 0.629 | 6.32E-130 | PA-2 |
| Kank1.1      | 2.28E-133 | -1.314 | 0.143 | 0.501 | 4.54E-129 | PA-2 |
| Col27a1      | 2.48E-133 | 0.845  | 0.316 | 0.073 | 4.95E-129 | PA-2 |
| Eps8.1       | 1.32E-130 | 1.041  | 0.657 | 0.332 | 2.63E-126 | PA-2 |
| Fn1.1        | 6.16E-130 | -0.874 | 0.723 | 0.93  | 1.23E-125 | PA-2 |
| Car8.1       | 2.19E-129 | -1.384 | 0.105 | 0.452 | 4.37E-125 | PA-2 |
| Cped1.1      | 1.71E-128 | 0.719  | 0.976 | 0.907 | 3.41E-124 | PA-2 |
| Lama2.1      | 6.82E-128 | 0.759  | 0.993 | 0.97  | 1.36E-123 | PA-2 |
| Adamts12.1   | 8.04E-128 | 1.094  | 0.932 | 0.817 | 1.61E-123 | PA-2 |
| Igfbp7.1     | 1.20E-127 | 0.820  | 0.699 | 0.356 | 2.39E-123 | PA-2 |
| Il1dr2.1     | 1.99E-127 | -1.260 | 0.211 | 0.556 | 3.97E-123 | PA-2 |
| Lurap1l.1    | 2.52E-126 | -1.248 | 0.274 | 0.609 | 5.03E-122 | PA-2 |
| Dact2.1      | 1.90E-124 | -1.510 | 0.05  | 0.378 | 3.79E-120 | PA-2 |
| Ano3.1       | 2.37E-124 | -1.274 | 0.208 | 0.566 | 4.74E-120 | PA-2 |
| Col3a1.1     | 4.15E-124 | 0.942  | 0.992 | 0.974 | 8.29E-120 | PA-2 |
| Slc24a3.1    | 4.20E-124 | 1.389  | 0.506 | 0.215 | 8.37E-120 | PA-2 |
| Gucy1a2.1    | 4.37E-123 | 1.100  | 0.515 | 0.212 | 8.72E-119 | PA-2 |
| Gan.1        | 7.01E-123 | -1.550 | 0.223 | 0.539 | 1.40E-118 | PA-2 |

|            |           |        |       |       |           |      |
|------------|-----------|--------|-------|-------|-----------|------|
| Fndc1.1    | 1.13E-121 | -0.803 | 0.831 | 0.942 | 2.25E-117 | PA-2 |
| Nfib.1     | 1.38E-121 | 0.607  | 0.983 | 0.919 | 2.76E-117 | PA-2 |
| Svep1.1    | 3.63E-121 | 0.995  | 0.812 | 0.553 | 7.25E-117 | PA-2 |
| Eya2.1     | 6.72E-121 | 0.975  | 0.505 | 0.202 | 1.34E-116 | PA-2 |
| Adamts16.1 | 2.10E-120 | -1.583 | 0.054 | 0.382 | 4.18E-116 | PA-2 |
| Tek.1      | 1.00E-118 | -1.171 | 0.463 | 0.715 | 2.00E-114 | PA-2 |
| Aldh1a3.1  | 1.36E-118 | -1.319 | 0.106 | 0.428 | 2.72E-114 | PA-2 |
| Ank2.1     | 1.32E-117 | 0.904  | 0.873 | 0.628 | 2.64E-113 | PA-2 |
| Samhd1.1   | 1.78E-117 | -0.997 | 0.516 | 0.761 | 3.55E-113 | PA-2 |
| Deptor.1   | 5.52E-115 | 1.004  | 0.546 | 0.247 | 1.10E-110 | PA-2 |
| Ntn4.1     | 4.32E-114 | -1.185 | 0.241 | 0.559 | 8.63E-110 | PA-2 |
| Zfp462.1   | 5.89E-114 | -1.081 | 0.416 | 0.705 | 1.18E-109 | PA-2 |
| Ror1.1     | 3.49E-113 | 0.904  | 0.794 | 0.515 | 6.97E-109 | PA-2 |
| Adgrg2.1   | 1.68E-112 | -1.138 | 0.201 | 0.528 | 3.35E-108 | PA-2 |
| Pcolce2.1  | 1.64E-111 | -1.019 | 0.462 | 0.726 | 3.27E-107 | PA-2 |
| Sema5a.1   | 5.28E-111 | 0.983  | 0.41  | 0.148 | 1.05E-106 | PA-2 |
| Agmo.1     | 5.49E-111 | 0.827  | 0.894 | 0.666 | 1.09E-106 | PA-2 |
| Palld.1    | 1.41E-110 | 0.894  | 0.352 | 0.107 | 2.81E-106 | PA-2 |
| Dock10.1   | 1.45E-106 | 0.866  | 0.64  | 0.334 | 2.89E-102 | PA-2 |
| Smpd3.1    | 3.47E-106 | -1.195 | 0.304 | 0.625 | 6.92E-102 | PA-2 |
| Plcl2.1    | 1.24E-105 | 0.811  | 0.41  | 0.147 | 2.48E-101 | PA-2 |
| Sept11.1   | 1.29E-103 | 0.898  | 0.573 | 0.295 | 2.57E-99  | PA-2 |
| Pde8a.1    | 8.16E-103 | -0.913 | 0.562 | 0.777 | 1.63E-98  | PA-2 |
| Ggt5       | 2.81E-102 | 0.682  | 0.251 | 0.058 | 5.62E-98  | PA-2 |
| Lum.1      | 4.13E-102 | 0.762  | 0.474 | 0.196 | 8.24E-98  | PA-2 |
| Adgrd1.1   | 4.21E-101 | -0.700 | 0.817 | 0.929 | 8.41E-97  | PA-2 |
| Acvr2a.1   | 4.23E-101 | 0.925  | 0.689 | 0.418 | 8.43E-97  | PA-2 |
| Pdgfc.1    | 4.63E-101 | -1.201 | 0.24  | 0.54  | 9.24E-97  | PA-2 |
| Pipp1.1    | 6.69E-101 | 0.887  | 0.523 | 0.24  | 1.33E-96  | PA-2 |
| Ptprj.1    | 1.10E-98  | -0.927 | 0.566 | 0.789 | 2.20E-94  | PA-2 |
| Setbp1.1   | 1.81E-98  | 0.739  | 0.923 | 0.798 | 3.61E-94  | PA-2 |
| Smurf2.1   | 3.06E-98  | -0.873 | 0.8   | 0.887 | 6.10E-94  | PA-2 |
| Fap        | 4.11E-98  | 0.847  | 0.876 | 0.731 | 8.20E-94  | PA-2 |
| Rgs6.1     | 1.26E-97  | -1.555 | 0.165 | 0.462 | 2.51E-93  | PA-2 |
| Dock4.1    | 2.22E-97  | -0.884 | 0.756 | 0.883 | 4.42E-93  | PA-2 |
| Sbsn.1     | 3.00E-97  | -1.325 | 0.052 | 0.327 | 6.00E-93  | PA-2 |
| Axl.1      | 4.08E-97  | -0.820 | 0.621 | 0.806 | 8.14E-93  | PA-2 |
| Arhgap24.1 | 4.16E-97  | 0.721  | 0.978 | 0.882 | 8.31E-93  | PA-2 |
| Sema3d.1   | 8.53E-96  | -1.049 | 0.133 | 0.44  | 1.70E-91  | PA-2 |
| Eda.1      | 3.97E-95  | 1.024  | 0.756 | 0.505 | 7.93E-91  | PA-2 |
| Gli2.1     | 6.28E-95  | 0.617  | 0.354 | 0.117 | 1.25E-90  | PA-2 |
| Ddr2.1     | 8.46E-95  | -0.631 | 0.908 | 0.955 | 1.69E-90  | PA-2 |
| Uap1.1     | 3.59E-93  | -0.995 | 0.463 | 0.7   | 7.16E-89  | PA-2 |
| Hdac7.1    | 2.33E-92  | -0.821 | 0.695 | 0.814 | 4.64E-88  | PA-2 |
| Sdk1.1     | 7.89E-92  | -0.663 | 0.853 | 0.932 | 1.58E-87  | PA-2 |
| Rorb.1     | 9.42E-92  | -1.218 | 0.244 | 0.537 | 1.88E-87  | PA-2 |
| Gas7.1     | 7.34E-91  | -0.730 | 0.738 | 0.896 | 1.47E-86  | PA-2 |
| Sulf1.1    | 9.98E-91  | -0.751 | 0.74  | 0.887 | 1.99E-86  | PA-2 |
| Nrp1.1     | 1.91E-90  | 0.757  | 0.705 | 0.418 | 3.82E-86  | PA-2 |
| Pcdh7.1    | 7.13E-89  | 0.756  | 0.93  | 0.803 | 1.42E-84  | PA-2 |
| Pdgfd.1    | 2.14E-88  | -0.886 | 0.665 | 0.842 | 4.27E-84  | PA-2 |
| Nr1h4.1    | 3.16E-87  | -1.138 | 0.187 | 0.461 | 6.31E-83  | PA-2 |
| Nhs1.1     | 3.94E-87  | -0.837 | 0.589 | 0.781 | 7.85E-83  | PA-2 |
| Arhgap6.1  | 3.11E-85  | 0.652  | 0.973 | 0.913 | 6.21E-81  | PA-2 |
| Pcolce.1   | 9.14E-84  | 0.754  | 0.572 | 0.311 | 1.82E-79  | PA-2 |
| Tox.1      | 6.36E-83  | 0.793  | 0.293 | 0.093 | 1.27E-78  | PA-2 |
| Bmp6.1     | 1.84E-82  | -1.276 | 0.129 | 0.395 | 3.66E-78  | PA-2 |
| Galnt16.1  | 2.68E-82  | -0.855 | 0.477 | 0.7   | 5.35E-78  | PA-2 |
| Ackr3.1    | 3.90E-82  | -0.910 | 0.464 | 0.69  | 7.78E-78  | PA-2 |
| Fyn.1      | 4.64E-82  | -0.602 | 0.786 | 0.892 | 9.27E-78  | PA-2 |
| Myo5a.1    | 9.47E-82  | 0.571  | 0.452 | 0.194 | 1.89E-77  | PA-2 |
| Col5a2     | 1.04E-81  | 0.609  | 0.968 | 0.933 | 2.07E-77  | PA-2 |

|            |          |        |       |       |          |      |
|------------|----------|--------|-------|-------|----------|------|
| Arhgef28.1 | 4.05E-81 | -0.830 | 0.436 | 0.683 | 8.08E-77 | PA-2 |
| Ugdh.1     | 8.00E-81 | -0.975 | 0.374 | 0.621 | 1.60E-76 | PA-2 |
| Fgf2.1     | 2.07E-80 | -0.869 | 0.321 | 0.585 | 4.14E-76 | PA-2 |
| Tcf4.1     | 2.70E-80 | 0.716  | 0.937 | 0.872 | 5.38E-76 | PA-2 |
| Mrc2       | 2.88E-80 | 0.700  | 0.692 | 0.461 | 5.76E-76 | PA-2 |
| Klf12.1    | 2.43E-79 | -0.873 | 0.482 | 0.704 | 4.85E-75 | PA-2 |
| Adam33.1   | 1.58E-78 | -0.831 | 0.446 | 0.677 | 3.15E-74 | PA-2 |
| Ablim1.1   | 7.67E-78 | -0.619 | 0.807 | 0.924 | 1.53E-73 | PA-2 |
| Kif2a.1    | 1.43E-77 | -0.802 | 0.49  | 0.695 | 2.85E-73 | PA-2 |
| Flnb.1     | 2.33E-77 | -0.727 | 0.458 | 0.691 | 4.65E-73 | PA-2 |
| Dclk1      | 2.66E-77 | 0.761  | 0.822 | 0.636 | 5.31E-73 | PA-2 |
| Abca8a.1   | 1.38E-76 | 0.763  | 0.834 | 0.639 | 2.75E-72 | PA-2 |
| Slc43a3.1  | 4.27E-76 | -0.692 | 0.786 | 0.882 | 8.53E-72 | PA-2 |
| Cyp1b1.1   | 5.11E-76 | 0.603  | 0.29  | 0.099 | 1.02E-71 | PA-2 |
| Pla1a.1    | 6.59E-76 | -0.865 | 0.441 | 0.648 | 1.32E-71 | PA-2 |
| Mfap5.1    | 9.37E-76 | -0.820 | 0.735 | 0.845 | 1.87E-71 | PA-2 |
| Slc4a4.1   | 1.44E-75 | -0.646 | 0.749 | 0.886 | 2.88E-71 | PA-2 |
| Itgbl1.1   | 7.89E-75 | 0.765  | 0.853 | 0.66  | 1.57E-70 | PA-2 |
| Kalrn.1    | 1.93E-74 | 0.733  | 0.27  | 0.089 | 3.84E-70 | PA-2 |
| Dhrs3.1    | 1.29E-73 | 0.668  | 0.364 | 0.153 | 2.57E-69 | PA-2 |
| Emilin2.1  | 1.53E-73 | -0.797 | 0.393 | 0.62  | 3.05E-69 | PA-2 |
| Egfr.1     | 2.65E-73 | 0.605  | 0.986 | 0.964 | 5.28E-69 | PA-2 |
| Frmd6.1    | 1.31E-71 | 0.650  | 0.847 | 0.674 | 2.62E-67 | PA-2 |
| Timp2.1    | 1.53E-71 | -0.955 | 0.53  | 0.72  | 3.05E-67 | PA-2 |
| Anxa1.1    | 1.91E-71 | -0.727 | 0.464 | 0.686 | 3.80E-67 | PA-2 |
| Adam22.1   | 3.08E-70 | -0.884 | 0.13  | 0.378 | 6.14E-66 | PA-2 |
| Rhoj       | 5.46E-70 | 0.737  | 0.917 | 0.842 | 1.09E-65 | PA-2 |
| Mgll.1     | 1.13E-69 | -0.788 | 0.216 | 0.466 | 2.26E-65 | PA-2 |
| Tspan5.1   | 1.37E-69 | -0.564 | 0.892 | 0.94  | 2.72E-65 | PA-2 |
| Stxbp6.1   | 1.40E-69 | -0.776 | 0.531 | 0.744 | 2.80E-65 | PA-2 |
| Reps2.1    | 1.63E-69 | 0.685  | 0.511 | 0.271 | 3.26E-65 | PA-2 |
| Marcks.1   | 2.06E-69 | -0.894 | 0.428 | 0.646 | 4.12E-65 | PA-2 |
| Jazf1.1    | 2.76E-69 | 0.797  | 0.408 | 0.193 | 5.51E-65 | PA-2 |
| Plce1.1    | 8.52E-69 | -0.576 | 0.822 | 0.924 | 1.70E-64 | PA-2 |
| Prickle2.1 | 1.01E-68 | 0.826  | 0.527 | 0.302 | 2.03E-64 | PA-2 |
| Gpc6.1     | 2.66E-68 | -0.566 | 0.973 | 0.98  | 5.32E-64 | PA-2 |
| Prkd1.1    | 2.94E-68 | 0.657  | 0.735 | 0.489 | 5.87E-64 | PA-2 |
| Pten.1     | 3.41E-68 | 0.804  | 0.749 | 0.586 | 6.80E-64 | PA-2 |
| mt-Co3.1   | 2.43E-67 | 0.600  | 0.987 | 0.947 | 4.85E-63 | PA-2 |
| Col6a1.1   | 6.79E-67 | 0.707  | 0.674 | 0.46  | 1.35E-62 | PA-2 |
| Rasa3.1    | 7.78E-67 | 0.696  | 0.38  | 0.173 | 1.55E-62 | PA-2 |
| mt-Nd5.1   | 1.46E-66 | 0.599  | 0.909 | 0.75  | 2.91E-62 | PA-2 |
| Sestd1.1   | 2.84E-66 | -0.728 | 0.52  | 0.691 | 5.67E-62 | PA-2 |
| Prkca.1    | 3.10E-66 | -0.555 | 0.861 | 0.926 | 6.19E-62 | PA-2 |
| Tgfb2.1    | 5.72E-65 | -0.639 | 0.668 | 0.803 | 1.14E-60 | PA-2 |
| Thbd.1     | 6.51E-65 | -0.824 | 0.104 | 0.327 | 1.30E-60 | PA-2 |
| Sntg1.1    | 7.90E-64 | -1.695 | 0.29  | 0.505 | 1.58E-59 | PA-2 |
| Clip1.1    | 8.32E-64 | -0.656 | 0.61  | 0.759 | 1.66E-59 | PA-2 |
| Maml3.1    | 1.84E-63 | 0.632  | 0.759 | 0.555 | 3.67E-59 | PA-2 |
| Lifr.1     | 2.04E-63 | 0.554  | 0.264 | 0.094 | 4.07E-59 | PA-2 |
| Tmem100.1  | 3.34E-63 | -0.806 | 0.171 | 0.401 | 6.66E-59 | PA-2 |
| Pcsk6.1    | 3.45E-63 | -0.835 | 0.45  | 0.641 | 6.89E-59 | PA-2 |
| Dact1.1    | 4.42E-63 | -0.791 | 0.183 | 0.41  | 8.82E-59 | PA-2 |
| Mmp3.1     | 6.73E-63 | 0.663  | 0.367 | 0.162 | 1.34E-58 | PA-2 |
| Lims2.1    | 6.97E-63 | -0.680 | 0.464 | 0.662 | 1.39E-58 | PA-2 |
| Pdzrn3.1   | 1.07E-62 | 0.907  | 0.46  | 0.25  | 2.13E-58 | PA-2 |
| Syt12.1    | 1.32E-62 | -0.793 | 0.105 | 0.325 | 2.64E-58 | PA-2 |
| Slco2b1.1  | 1.47E-62 | 0.616  | 0.398 | 0.185 | 2.94E-58 | PA-2 |
| Adamts1.1  | 2.38E-62 | -0.700 | 0.833 | 0.918 | 4.75E-58 | PA-2 |
| Plcl1.1    | 4.58E-62 | 0.703  | 0.76  | 0.561 | 9.14E-58 | PA-2 |
| Calcl1.1   | 1.68E-61 | -1.043 | 0.322 | 0.537 | 3.35E-57 | PA-2 |
| Myo1e.1    | 1.95E-61 | -0.755 | 0.37  | 0.591 | 3.89E-57 | PA-2 |

|              |          |        |       |       |          |      |
|--------------|----------|--------|-------|-------|----------|------|
| mt-Nd1.1     | 9.96E-61 | 0.546  | 0.97  | 0.901 | 1.99E-56 | PA-2 |
| Trim30d.1    | 2.02E-60 | -0.855 | 0.201 | 0.42  | 4.03E-56 | PA-2 |
| Errfi1       | 3.03E-60 | -0.712 | 0.528 | 0.726 | 6.06E-56 | PA-2 |
| Igfbp6.1     | 9.95E-60 | -0.891 | 0.409 | 0.63  | 1.99E-55 | PA-2 |
| Plod1.1      | 1.31E-59 | 0.511  | 0.271 | 0.104 | 2.60E-55 | PA-2 |
| Klf4.1       | 7.16E-59 | -0.747 | 0.343 | 0.553 | 1.43E-54 | PA-2 |
| Ssc5d        | 7.32E-59 | 0.500  | 0.301 | 0.122 | 1.46E-54 | PA-2 |
| Apbb2.1      | 8.25E-59 | -0.533 | 0.794 | 0.89  | 1.65E-54 | PA-2 |
| Rras2.1      | 6.20E-58 | -0.857 | 0.27  | 0.486 | 1.24E-53 | PA-2 |
| 4930402H24Ri | 2.08E-57 | 0.548  | 0.794 | 0.622 | 4.16E-53 | PA-2 |
| Col14a1.1    | 2.33E-57 | -0.619 | 0.673 | 0.841 | 4.64E-53 | PA-2 |
| Mycbp2.1     | 5.66E-57 | 0.524  | 0.877 | 0.767 | 1.13E-52 | PA-2 |
| Rab31.1      | 1.37E-56 | 0.560  | 0.364 | 0.172 | 2.73E-52 | PA-2 |
| Map4k4.1     | 1.64E-56 | 0.511  | 0.849 | 0.699 | 3.28E-52 | PA-2 |
| Pdzd2.1      | 1.69E-56 | -0.756 | 0.427 | 0.617 | 3.37E-52 | PA-2 |
| mt-Cytb.1    | 3.22E-56 | 0.537  | 0.974 | 0.913 | 6.43E-52 | PA-2 |
| Pdgfrb.1     | 4.50E-56 | 0.598  | 0.442 | 0.242 | 8.98E-52 | PA-2 |
| Gsn.1        | 9.09E-56 | 0.593  | 0.967 | 0.895 | 1.82E-51 | PA-2 |
| St5.1        | 1.03E-55 | 0.659  | 0.62  | 0.419 | 2.05E-51 | PA-2 |
| Ebf2.1       | 1.10E-55 | -0.560 | 0.967 | 0.976 | 2.20E-51 | PA-2 |
| Adamts13     | 1.12E-55 | -0.887 | 0.185 | 0.406 | 2.24E-51 | PA-2 |
| Adamts5.1    | 1.76E-55 | -0.689 | 0.809 | 0.857 | 3.52E-51 | PA-2 |
| Bach2.1      | 7.67E-55 | -0.688 | 0.403 | 0.606 | 1.53E-50 | PA-2 |
| mt-Co2.1     | 1.16E-54 | 0.507  | 0.981 | 0.938 | 2.32E-50 | PA-2 |
| Antxr1.1     | 1.80E-54 | -0.511 | 0.809 | 0.89  | 3.60E-50 | PA-2 |
| Clip4.1      | 2.82E-54 | -0.651 | 0.14  | 0.35  | 5.63E-50 | PA-2 |
| Plekha5      | 4.75E-54 | 0.537  | 0.838 | 0.698 | 9.47E-50 | PA-2 |
| Snrk.1       | 6.28E-54 | 0.591  | 0.428 | 0.231 | 1.25E-49 | PA-2 |
| Eya4.1       | 2.53E-53 | -0.849 | 0.249 | 0.469 | 5.06E-49 | PA-2 |
| Adh1.1       | 5.95E-53 | 0.706  | 0.301 | 0.134 | 1.19E-48 | PA-2 |
| Ptprd        | 1.72E-52 | 0.704  | 0.692 | 0.515 | 3.44E-48 | PA-2 |
| Metrn1.1     | 5.81E-52 | -0.663 | 0.117 | 0.31  | 1.16E-47 | PA-2 |
| Prkg2.1      | 1.62E-51 | -0.731 | 0.088 | 0.278 | 3.23E-47 | PA-2 |
| Apbb1ip.1    | 4.90E-51 | 0.632  | 0.797 | 0.664 | 9.79E-47 | PA-2 |
| Adam19.1     | 7.23E-51 | 0.684  | 0.632 | 0.454 | 1.44E-46 | PA-2 |
| Stxbp5.1     | 3.16E-50 | -0.664 | 0.584 | 0.724 | 6.30E-46 | PA-2 |
| Fgfr1.1      | 4.09E-50 | -0.527 | 0.689 | 0.801 | 8.17E-46 | PA-2 |
| Flrt2.1      | 1.51E-49 | -0.631 | 0.761 | 0.857 | 3.01E-45 | PA-2 |
| Ccdc80.1     | 5.61E-49 | 0.611  | 0.79  | 0.634 | 1.12E-44 | PA-2 |
| Spsb1.1      | 6.69E-49 | -0.655 | 0.354 | 0.548 | 1.33E-44 | PA-2 |
| Twist2       | 6.76E-49 | 0.569  | 0.385 | 0.203 | 1.35E-44 | PA-2 |
| Phldb2.1     | 1.54E-48 | 0.662  | 0.599 | 0.412 | 3.08E-44 | PA-2 |
| Prex2.1      | 2.27E-48 | 0.621  | 0.608 | 0.415 | 4.53E-44 | PA-2 |
| Adra1b.1     | 3.62E-48 | -0.702 | 0.094 | 0.278 | 7.23E-44 | PA-2 |
| Fhl1.1       | 4.93E-48 | -0.713 | 0.239 | 0.436 | 9.84E-44 | PA-2 |
| St6gal1.1    | 9.06E-48 | -0.679 | 0.192 | 0.391 | 1.81E-43 | PA-2 |
| Rin3.1       | 1.11E-47 | -0.621 | 0.121 | 0.311 | 2.22E-43 | PA-2 |
| Plcx3        | 2.35E-47 | -0.954 | 0.164 | 0.37  | 4.70E-43 | PA-2 |
| Cadm3.1      | 3.57E-47 | -0.681 | 0.193 | 0.385 | 7.12E-43 | PA-2 |
| Il1r1        | 3.59E-47 | 0.662  | 0.731 | 0.58  | 7.16E-43 | PA-2 |
| Prss23.1     | 3.64E-47 | -0.746 | 0.297 | 0.481 | 7.26E-43 | PA-2 |
| Atxn1.1      | 4.33E-47 | 0.564  | 0.73  | 0.553 | 8.65E-43 | PA-2 |
| Sh3pxd2a.1   | 4.44E-47 | 0.514  | 0.333 | 0.163 | 8.86E-43 | PA-2 |
| Fam78b.1     | 4.55E-47 | 0.525  | 0.29  | 0.131 | 9.07E-43 | PA-2 |
| Cyth3.1      | 5.97E-47 | 0.684  | 0.712 | 0.549 | 1.19E-42 | PA-2 |
| Slc8a1       | 9.05E-47 | -0.701 | 0.539 | 0.708 | 1.81E-42 | PA-2 |
| Frm4a.1      | 3.16E-46 | 0.594  | 0.474 | 0.279 | 6.30E-42 | PA-2 |
| Enox1        | 3.43E-46 | 0.534  | 0.726 | 0.55  | 6.84E-42 | PA-2 |
| Wnt2.1       | 3.71E-46 | -0.656 | 0.104 | 0.287 | 7.41E-42 | PA-2 |
| Hspg2        | 5.03E-46 | 0.567  | 0.669 | 0.52  | 1.00E-41 | PA-2 |
| Map3k5.1     | 6.35E-46 | 0.575  | 0.597 | 0.421 | 1.27E-41 | PA-2 |
| Il18.1       | 3.90E-45 | -0.641 | 0.164 | 0.349 | 7.78E-41 | PA-2 |

|            |          |        |       |       |          |      |
|------------|----------|--------|-------|-------|----------|------|
| lqsec1.1   | 4.23E-45 | -0.615 | 0.311 | 0.496 | 8.45E-41 | PA-2 |
| Serping1   | 7.18E-45 | -0.676 | 0.711 | 0.802 | 1.43E-40 | PA-2 |
| Psd3.1     | 8.21E-45 | -0.545 | 0.879 | 0.914 | 1.64E-40 | PA-2 |
| Scara3.1   | 2.25E-44 | -0.620 | 0.261 | 0.442 | 4.48E-40 | PA-2 |
| Wnt5b.1    | 2.73E-44 | -0.743 | 0.083 | 0.251 | 5.45E-40 | PA-2 |
| Raph1.1    | 3.84E-44 | 0.535  | 0.638 | 0.455 | 7.66E-40 | PA-2 |
| Atp2b1.1   | 5.08E-44 | -0.505 | 0.607 | 0.743 | 1.01E-39 | PA-2 |
| Abca5.1    | 6.19E-44 | -0.629 | 0.206 | 0.392 | 1.24E-39 | PA-2 |
| Colec12.1  | 1.47E-43 | 0.613  | 0.581 | 0.394 | 2.94E-39 | PA-2 |
| Arhgef3    | 2.20E-43 | -0.559 | 0.51  | 0.684 | 4.38E-39 | PA-2 |
| Igfbp4.1   | 1.30E-42 | -0.648 | 0.295 | 0.483 | 2.60E-38 | PA-2 |
| Pcdh9.1    | 1.91E-42 | -0.879 | 0.389 | 0.574 | 3.81E-38 | PA-2 |
| Rnf144a    | 2.60E-42 | 0.593  | 0.256 | 0.115 | 5.19E-38 | PA-2 |
| Klf2.1     | 3.56E-42 | -0.621 | 0.173 | 0.354 | 7.11E-38 | PA-2 |
| Tshz3      | 4.56E-42 | 0.558  | 0.623 | 0.45  | 9.11E-38 | PA-2 |
| Robo1.1    | 6.08E-42 | -0.881 | 0.439 | 0.599 | 1.21E-37 | PA-2 |
| Angpt1.1   | 7.53E-42 | 0.595  | 0.575 | 0.376 | 1.50E-37 | PA-2 |
| Basp1.1    | 1.63E-41 | -0.643 | 0.229 | 0.412 | 3.25E-37 | PA-2 |
| Pamr1.1    | 2.01E-41 | -0.576 | 0.405 | 0.586 | 4.02E-37 | PA-2 |
| Adamts14.1 | 2.32E-41 | -0.564 | 0.157 | 0.332 | 4.63E-37 | PA-2 |
| Ly6c1.1    | 2.35E-41 | -0.665 | 0.28  | 0.465 | 4.70E-37 | PA-2 |
| Clec3b     | 3.85E-41 | -0.613 | 0.74  | 0.866 | 7.69E-37 | PA-2 |
| Glce.1     | 4.13E-41 | -0.667 | 0.305 | 0.48  | 8.24E-37 | PA-2 |
| Sh3rf3.1   | 4.19E-41 | 0.510  | 0.441 | 0.256 | 8.36E-37 | PA-2 |
| Cpne8.1    | 1.06E-40 | -0.528 | 0.537 | 0.707 | 2.11E-36 | PA-2 |
| Procr.1    | 2.85E-40 | -0.659 | 0.208 | 0.381 | 5.69E-36 | PA-2 |
| Mef2c      | 4.85E-40 | -0.570 | 0.397 | 0.565 | 9.69E-36 | PA-2 |
| Jag1.1     | 5.31E-40 | -0.707 | 0.263 | 0.434 | 1.06E-35 | PA-2 |
| Lvrn.1     | 8.31E-40 | -0.654 | 0.419 | 0.599 | 1.66E-35 | PA-2 |
| Nipal2.1   | 8.31E-40 | -0.652 | 0.211 | 0.392 | 1.66E-35 | PA-2 |
| Atp6v0a1.1 | 1.36E-39 | 0.506  | 0.439 | 0.268 | 2.71E-35 | PA-2 |
| Cdk8       | 1.74E-39 | 0.548  | 0.71  | 0.554 | 3.47E-35 | PA-2 |
| Epha3.1    | 1.77E-39 | -0.829 | 0.208 | 0.393 | 3.54E-35 | PA-2 |
| Arl4a.1    | 3.60E-39 | -0.607 | 0.28  | 0.451 | 7.19E-35 | PA-2 |
| Disp1.1    | 5.12E-39 | -0.578 | 0.37  | 0.537 | 1.02E-34 | PA-2 |
| Hspa12b    | 9.29E-39 | -0.539 | 0.099 | 0.261 | 1.86E-34 | PA-2 |
| Pde7a.1    | 3.97E-38 | -0.529 | 0.349 | 0.534 | 7.93E-34 | PA-2 |
| Gpm6b.1    | 4.32E-38 | 0.752  | 0.408 | 0.245 | 8.63E-34 | PA-2 |
| Cp.1       | 7.88E-38 | 0.548  | 0.324 | 0.172 | 1.57E-33 | PA-2 |
| Zyx.1      | 1.55E-37 | -0.526 | 0.147 | 0.313 | 3.10E-33 | PA-2 |
| Cd248.1    | 3.29E-37 | -0.670 | 0.347 | 0.512 | 6.58E-33 | PA-2 |
| Rhoq.1     | 4.05E-37 | -0.531 | 0.505 | 0.639 | 8.09E-33 | PA-2 |
| Smurf1.1   | 4.62E-37 | -0.570 | 0.471 | 0.615 | 9.23E-33 | PA-2 |
| Lox        | 4.82E-37 | 0.620  | 0.288 | 0.15  | 9.62E-33 | PA-2 |
| C3.1       | 7.15E-37 | -0.755 | 0.426 | 0.596 | 1.43E-32 | PA-2 |
| Emp1.1     | 2.08E-36 | 0.548  | 0.456 | 0.294 | 4.15E-32 | PA-2 |
| Cacna1c.1  | 2.15E-36 | 0.561  | 0.37  | 0.209 | 4.29E-32 | PA-2 |
| Clmp       | 2.65E-36 | 0.504  | 0.662 | 0.49  | 5.28E-32 | PA-2 |
| Ly6a.1     | 6.83E-36 | -0.579 | 0.459 | 0.626 | 1.36E-31 | PA-2 |
| Gda        | 1.06E-35 | -0.529 | 0.329 | 0.5   | 2.11E-31 | PA-2 |
| Tbc1d12.1  | 1.96E-35 | -0.554 | 0.477 | 0.614 | 3.91E-31 | PA-2 |
| Dlg2.1     | 5.20E-35 | -0.668 | 0.172 | 0.339 | 1.04E-30 | PA-2 |
| Ppp1r9a.1  | 2.09E-34 | -0.609 | 0.221 | 0.389 | 4.17E-30 | PA-2 |
| Col8a1     | 3.40E-34 | 0.923  | 0.305 | 0.165 | 6.78E-30 | PA-2 |
| Bicd1.1    | 3.68E-34 | -0.579 | 0.267 | 0.436 | 7.35E-30 | PA-2 |
| Mylip.1    | 1.70E-33 | -0.525 | 0.106 | 0.252 | 3.40E-29 | PA-2 |
| Fbln2      | 2.27E-33 | 0.542  | 0.764 | 0.643 | 4.53E-29 | PA-2 |
| Igf1.1     | 2.76E-33 | 0.533  | 0.35  | 0.199 | 5.52E-29 | PA-2 |
| Xkr4.1     | 3.33E-33 | 0.668  | 0.421 | 0.266 | 6.65E-29 | PA-2 |
| Pi15       | 5.65E-33 | -0.527 | 0.121 | 0.274 | 1.13E-28 | PA-2 |
| Dbn1.1     | 2.67E-32 | -0.506 | 0.275 | 0.434 | 5.34E-28 | PA-2 |
| Prr16.1    | 6.08E-32 | 0.505  | 0.331 | 0.183 | 1.21E-27 | PA-2 |



|            |           |        |       |       |             |      |
|------------|-----------|--------|-------|-------|-------------|------|
| Nedd4l     | 7.28E-32  | 0.551  | 0.542 | 0.389 | 1.45E-27    | PA-2 |
| Plpp3.1    | 3.61E-31  | -0.514 | 0.845 | 0.89  | 7.20E-27    | PA-2 |
| Slc16a9.1  | 4.04E-31  | -0.599 | 0.213 | 0.364 | 8.07E-27    | PA-2 |
| Gabra3     | 7.43E-31  | -0.657 | 0.383 | 0.541 | 1.48E-26    | PA-2 |
| Fam110b    | 1.07E-30  | 0.528  | 0.348 | 0.209 | 2.13E-26    | PA-2 |
| Daglb.1    | 5.02E-30  | -0.644 | 0.231 | 0.379 | 1.00E-25    | PA-2 |
| Adamts15   | 9.99E-30  | -0.509 | 0.267 | 0.424 | 1.99E-25    | PA-2 |
| Irs1.1     | 1.58E-29  | 0.505  | 0.569 | 0.417 | 3.16E-25    | PA-2 |
| Nckap5.1   | 1.29E-28  | 0.521  | 0.679 | 0.547 | 2.58E-24    | PA-2 |
| Rps15.1    | 3.17E-28  | -0.776 | 0.171 | 0.312 | 6.33E-24    | PA-2 |
| Hpgd       | 3.82E-28  | 0.693  | 0.423 | 0.283 | 7.62E-24    | PA-2 |
| Mpp6       | 5.74E-26  | -0.501 | 0.255 | 0.399 | 1.15E-21    | PA-2 |
| Sfrp2      | 1.08E-25  | -0.559 | 0.157 | 0.293 | 2.16E-21    | PA-2 |
| Sned1.1    | 1.65E-25  | 0.677  | 0.431 | 0.298 | 3.29E-21    | PA-2 |
| Col1a1.1   | 3.06E-25  | 0.538  | 0.835 | 0.76  | 6.11E-21    | PA-2 |
| Chsy3      | 2.79E-23  | 0.501  | 0.344 | 0.219 | 5.58E-19    | PA-2 |
| Dkk2       | 3.60E-22  | 1.057  | 0.256 | 0.153 | 7.19E-18    | PA-2 |
| Dpt.1      | 1.95E-21  | -0.541 | 0.625 | 0.71  | 3.89E-17    | PA-2 |
| Rps21.1    | 2.32E-21  | -0.637 | 0.247 | 0.37  | 4.63E-17    | PA-2 |
| Postn      | 5.09E-20  | 0.676  | 0.507 | 0.389 | 1.01E-15    | PA-2 |
| Aebp1      | 2.27E-19  | -0.568 | 0.471 | 0.564 | 4.52E-15    | PA-2 |
| Esr1       | 3.08E-19  | 0.544  | 0.712 | 0.648 | 6.15E-15    | PA-2 |
| Rnf220.1   | 1.74E-17  | -0.632 | 0.184 | 0.283 | 3.48E-13    | PA-2 |
| Thsd7a     | 3.49E-17  | 0.536  | 0.852 | 0.806 | 6.97E-13    | PA-2 |
| Gas1.1     | 4.01E-17  | 0.561  | 0.375 | 0.272 | 8.00E-13    | PA-2 |
| C7.1       | 2.32E-11  | -0.734 | 0.39  | 0.478 | 4.64E-07    | PA-2 |
| Tmtc2.1    | 4.28E-10  | -0.643 | 0.252 | 0.325 | 8.54E-06    | PA-2 |
| Eln        | 4.75E-06  | 0.619  | 0.588 | 0.661 | 0.094892669 | PA-2 |
| Fmo2.1     | 0         | 3.021  | 0.876 | 0.145 | 0           | PA-3 |
| C7.2       | 0         | 2.934  | 0.912 | 0.394 | 0           | PA-3 |
| Ccbe1.1    | 0         | 2.409  | 0.673 | 0.091 | 0           | PA-3 |
| Meox2.1    | 0         | 2.398  | 0.837 | 0.207 | 0           | PA-3 |
| F3.1       | 0         | 2.393  | 0.703 | 0.093 | 0           | PA-3 |
| Gdf10.1    | 0         | 2.099  | 0.621 | 0.05  | 0           | PA-3 |
| Vit.1      | 5.69E-274 | 1.581  | 0.648 | 0.135 | 1.14E-269   | PA-3 |
| Nav3.2     | 3.55E-257 | -3.001 | 0.438 | 0.892 | 7.09E-253   | PA-3 |
| Prdm6      | 2.14E-255 | 1.526  | 0.494 | 0.075 | 4.28E-251   | PA-3 |
| Gpnm6      | 1.40E-244 | 1.195  | 0.438 | 0.057 | 2.79E-240   | PA-3 |
| Epha3.2    | 3.32E-236 | 1.786  | 0.822 | 0.286 | 6.63E-232   | PA-3 |
| Prickle1.1 | 3.46E-236 | 2.001  | 0.836 | 0.342 | 6.90E-232   | PA-3 |
| Dpp4.2     | 6.24E-236 | -2.518 | 0.366 | 0.847 | 1.25E-231   | PA-3 |
| Mgp        | 1.06E-235 | 1.795  | 0.424 | 0.055 | 2.12E-231   | PA-3 |
| Chrdl1.1   | 7.77E-234 | 1.943  | 0.626 | 0.154 | 1.55E-229   | PA-3 |
| Tspan11    | 4.70E-229 | 1.229  | 0.388 | 0.046 | 9.38E-225   | PA-3 |
| Gria4.1    | 2.98E-226 | 3.034  | 0.502 | 0.097 | 5.94E-222   | PA-3 |
| Creb5.2    | 1.74E-222 | -2.113 | 0.7   | 0.925 | 3.47E-218   | PA-3 |
| Abi3bp.1   | 1.66E-220 | 1.451  | 0.974 | 0.814 | 3.31E-216   | PA-3 |
| Anxa3.2    | 7.70E-218 | -2.155 | 0.49  | 0.861 | 1.54E-213   | PA-3 |
| Inmt.1     | 4.05E-213 | 1.746  | 0.54  | 0.118 | 8.08E-209   | PA-3 |
| Kcnt2.1    | 1.27E-212 | 1.668  | 0.879 | 0.435 | 2.54E-208   | PA-3 |
| Pde4d.1    | 1.96E-210 | 1.896  | 0.597 | 0.151 | 3.92E-206   | PA-3 |
| Gas6.1     | 3.68E-209 | 1.443  | 0.515 | 0.105 | 7.35E-205   | PA-3 |
| Gpr39      | 8.05E-208 | 1.762  | 0.371 | 0.048 | 1.61E-203   | PA-3 |
| Nalcn.1    | 4.47E-207 | 1.499  | 0.55  | 0.124 | 8.93E-203   | PA-3 |
| Tiam2.1    | 4.45E-204 | 1.207  | 0.451 | 0.078 | 8.88E-200   | PA-3 |
| Sgip1.2    | 2.44E-199 | 1.309  | 0.636 | 0.163 | 4.88E-195   | PA-3 |
| Igfbp7.2   | 2.33E-195 | 1.585  | 0.82  | 0.374 | 4.66E-191   | PA-3 |
| Plxdc2.1   | 1.82E-193 | -1.349 | 0.803 | 0.979 | 3.63E-189   | PA-3 |
| Nova1.1    | 3.33E-189 | -1.525 | 0.738 | 0.953 | 6.64E-185   | PA-3 |
| Limch1.2   | 8.48E-187 | -2.324 | 0.169 | 0.709 | 1.69E-182   | PA-3 |
| Fbn1.2     | 9.22E-185 | -1.679 | 0.943 | 0.98  | 1.84E-180   | PA-3 |
| Ltbp4.1    | 1.40E-181 | 1.613  | 0.654 | 0.23  | 2.80E-177   | PA-3 |

|           |           |        |       |       |           |      |
|-----------|-----------|--------|-------|-------|-----------|------|
| Bgn.2     | 1.28E-180 | 1.542  | 0.731 | 0.281 | 2.55E-176 | PA-3 |
| C2        | 2.07E-180 | 1.081  | 0.351 | 0.051 | 4.12E-176 | PA-3 |
| Pid1.1    | 3.77E-178 | 1.527  | 0.964 | 0.731 | 7.53E-174 | PA-3 |
| Nfib.2    | 2.31E-177 | 1.101  | 0.991 | 0.925 | 4.61E-173 | PA-3 |
| Sema3c.2  | 6.21E-172 | -1.884 | 0.714 | 0.89  | 1.24E-167 | PA-3 |
| Csmd1     | 5.32E-168 | 2.321  | 0.507 | 0.129 | 1.06E-163 | PA-3 |
| Adamts5.2 | 8.14E-168 | -1.657 | 0.575 | 0.885 | 1.62E-163 | PA-3 |
| Cmah.2    | 9.24E-168 | -2.240 | 0.148 | 0.668 | 1.84E-163 | PA-3 |
| Ebf1.1    | 2.29E-167 | -1.088 | 0.99  | 0.998 | 4.56E-163 | PA-3 |
| Pla1a.2   | 2.47E-167 | -1.836 | 0.141 | 0.669 | 4.94E-163 | PA-3 |
| Sgcd.1    | 4.85E-167 | 1.612  | 0.877 | 0.506 | 9.67E-163 | PA-3 |
| Cd55.2    | 1.47E-166 | -2.047 | 0.285 | 0.736 | 2.93E-162 | PA-3 |
| Itgbl1.2  | 4.11E-164 | 1.384  | 0.944 | 0.667 | 8.20E-160 | PA-3 |
| Gsn.2     | 1.20E-162 | 1.661  | 0.991 | 0.899 | 2.39E-158 | PA-3 |
| Pi16.2    | 3.08E-162 | -2.545 | 0.387 | 0.773 | 6.15E-158 | PA-3 |
| Efemp1.2  | 5.52E-161 | -1.865 | 0.393 | 0.793 | 1.10E-156 | PA-3 |
| Tek.2     | 1.78E-158 | -1.808 | 0.238 | 0.721 | 3.55E-154 | PA-3 |
| Grem2     | 8.10E-157 | 1.058  | 0.282 | 0.035 | 1.62E-152 | PA-3 |
| Sema3e.2  | 1.07E-152 | -2.475 | 0.132 | 0.634 | 2.14E-148 | PA-3 |
| Ism1.1    | 1.81E-152 | 1.627  | 0.469 | 0.119 | 3.61E-148 | PA-3 |
| Stxbp6.2  | 1.14E-149 | -1.708 | 0.299 | 0.755 | 2.27E-145 | PA-3 |
| Sdk1.2    | 2.04E-148 | -1.212 | 0.721 | 0.943 | 4.08E-144 | PA-3 |
| Nrp1.2    | 2.48E-145 | 1.289  | 0.825 | 0.431 | 4.95E-141 | PA-3 |
| Spock2    | 6.08E-143 | 0.876  | 0.289 | 0.043 | 1.21E-138 | PA-3 |
| Efna5.2   | 7.24E-143 | -2.148 | 0.184 | 0.657 | 1.44E-138 | PA-3 |
| Ston2.2   | 2.02E-141 | -1.835 | 0.192 | 0.657 | 4.04E-137 | PA-3 |
| Psd3.2    | 3.53E-140 | -1.246 | 0.709 | 0.935 | 7.05E-136 | PA-3 |
| Vav3.2    | 8.69E-139 | 1.033  | 0.622 | 0.204 | 1.73E-134 | PA-3 |
| Ephb2     | 3.43E-133 | 0.979  | 0.317 | 0.057 | 6.85E-129 | PA-3 |
| Ptprj.2   | 1.54E-132 | -1.513 | 0.414 | 0.788 | 3.08E-128 | PA-3 |
| Hmgcs2    | 2.33E-132 | 0.825  | 0.275 | 0.041 | 4.65E-128 | PA-3 |
| Cdh13.1   | 3.42E-132 | 1.343  | 0.776 | 0.405 | 6.83E-128 | PA-3 |
| Frmd6.2   | 3.63E-132 | 1.205  | 0.915 | 0.682 | 7.25E-128 | PA-3 |
| Tgfb1.1   | 6.94E-131 | 1.106  | 0.402 | 0.098 | 1.38E-126 | PA-3 |
| Slc6a7    | 1.29E-130 | 0.898  | 0.265 | 0.038 | 2.57E-126 | PA-3 |
| Plcx3.1   | 1.37E-130 | 1.916  | 0.648 | 0.279 | 2.73E-126 | PA-3 |
| Igf1.2    | 2.53E-130 | 1.225  | 0.553 | 0.185 | 5.06E-126 | PA-3 |
| Smurf2.2  | 1.04E-128 | -1.284 | 0.679 | 0.896 | 2.07E-124 | PA-3 |
| Lum.2     | 1.19E-127 | 1.245  | 0.567 | 0.212 | 2.38E-123 | PA-3 |
| Igfbp5.2  | 2.50E-126 | -2.342 | 0.255 | 0.671 | 4.98E-122 | PA-3 |
| Cfh.1     | 6.59E-126 | 1.269  | 0.566 | 0.199 | 1.32E-121 | PA-3 |
| Rorb.2    | 2.85E-125 | -2.057 | 0.072 | 0.531 | 5.69E-121 | PA-3 |
| Podn.1    | 1.49E-124 | 1.000  | 0.552 | 0.193 | 2.97E-120 | PA-3 |
| Ank2.2    | 3.93E-124 | 1.048  | 0.923 | 0.646 | 7.85E-120 | PA-3 |
| Steap4.1  | 6.82E-122 | 0.989  | 0.361 | 0.082 | 1.36E-117 | PA-3 |
| Cd9.1     | 2.21E-121 | 1.082  | 0.529 | 0.184 | 4.41E-117 | PA-3 |
| Angpt1.2  | 2.86E-121 | 1.232  | 0.751 | 0.372 | 5.71E-117 | PA-3 |
| Ak5       | 8.00E-120 | 0.933  | 0.25  | 0.038 | 1.60E-115 | PA-3 |
| Boc.1     | 9.65E-118 | 1.223  | 0.685 | 0.327 | 1.93E-113 | PA-3 |
| B3galt1.1 | 9.63E-116 | 1.180  | 0.868 | 0.548 | 1.92E-111 | PA-3 |
| Efhd1.2   | 3.16E-115 | -1.627 | 0.07  | 0.505 | 6.31E-111 | PA-3 |
| Calcr1.2  | 9.08E-115 | -1.762 | 0.104 | 0.546 | 1.81E-110 | PA-3 |
| Mast4     | 2.27E-114 | -1.128 | 0.806 | 0.961 | 4.54E-110 | PA-3 |
| Vgll3.1   | 3.70E-114 | -1.377 | 0.303 | 0.707 | 7.39E-110 | PA-3 |
| Cacna1c.2 | 6.64E-114 | 1.055  | 0.555 | 0.199 | 1.33E-109 | PA-3 |
| Ppl       | 1.40E-113 | 0.951  | 0.377 | 0.096 | 2.80E-109 | PA-3 |
| Hmcn2.2   | 1.15E-110 | 1.276  | 0.629 | 0.268 | 2.29E-106 | PA-3 |
| Cygb.1    | 1.37E-110 | 1.078  | 0.522 | 0.197 | 2.74E-106 | PA-3 |
| Pcsk6.2   | 2.46E-109 | -1.499 | 0.251 | 0.65  | 4.90E-105 | PA-3 |
| Ano3.2    | 1.06E-108 | -1.604 | 0.107 | 0.543 | 2.11E-104 | PA-3 |
| Ghr.1     | 4.18E-107 | 1.118  | 0.964 | 0.854 | 8.35E-103 | PA-3 |
| Slco2b1.2 | 1.44E-106 | 1.009  | 0.524 | 0.189 | 2.87E-102 | PA-3 |

|            |           |        |       |       |           |      |
|------------|-----------|--------|-------|-------|-----------|------|
| Ext1.1     | 2.77E-106 | -1.066 | 0.894 | 0.969 | 5.52E-102 | PA-3 |
| Prkd1.2    | 4.08E-106 | 1.091  | 0.816 | 0.503 | 8.15E-102 | PA-3 |
| Ldb2.2     | 5.76E-105 | 0.936  | 0.674 | 0.295 | 1.15E-100 | PA-3 |
| Wdr66.1    | 2.16E-104 | 0.907  | 0.419 | 0.126 | 4.32E-100 | PA-3 |
| Hdac7.2    | 4.05E-102 | -1.080 | 0.551 | 0.822 | 8.08E-98  | PA-3 |
| Utrn.1     | 7.51E-102 | -0.822 | 0.907 | 0.965 | 1.50E-97  | PA-3 |
| Galnt16.2  | 2.98E-100 | -1.265 | 0.346 | 0.695 | 5.94E-96  | PA-3 |
| Eya2.2     | 3.19E-98  | 0.914  | 0.572 | 0.224 | 6.37E-94  | PA-3 |
| Axl.2      | 6.42E-98  | -1.083 | 0.552 | 0.796 | 1.28E-93  | PA-3 |
| Cst3       | 2.37E-96  | 1.647  | 0.425 | 0.149 | 4.74E-92  | PA-3 |
| Vegfc.1    | 1.56E-94  | 1.173  | 0.474 | 0.176 | 3.11E-90  | PA-3 |
| Gas7.2     | 1.64E-94  | -1.200 | 0.711 | 0.884 | 3.27E-90  | PA-3 |
| Entpd2.1   | 3.59E-94  | 1.000  | 0.575 | 0.264 | 7.17E-90  | PA-3 |
| Nid1.1     | 5.80E-93  | -0.882 | 0.796 | 0.919 | 1.16E-88  | PA-3 |
| Fndc1.2    | 1.46E-92  | -0.955 | 0.827 | 0.931 | 2.91E-88  | PA-3 |
| Gfpt2.2    | 4.35E-90  | -1.148 | 0.563 | 0.803 | 8.68E-86  | PA-3 |
| Robo1.2    | 8.21E-90  | -1.345 | 0.23  | 0.612 | 1.64E-85  | PA-3 |
| Col4a1.2   | 1.49E-88  | 0.806  | 0.769 | 0.424 | 2.98E-84  | PA-3 |
| Agmo.2     | 1.52E-88  | 0.922  | 0.923 | 0.686 | 3.03E-84  | PA-3 |
| Aspn       | 8.33E-88  | -1.178 | 0.243 | 0.624 | 1.66E-83  | PA-3 |
| Col4a2.2   | 1.03E-85  | 0.831  | 0.688 | 0.341 | 2.05E-81  | PA-3 |
| Lurap11.2  | 1.59E-85  | -1.336 | 0.221 | 0.582 | 3.17E-81  | PA-3 |
| Vcan.1     | 3.83E-85  | -1.216 | 0.432 | 0.73  | 7.65E-81  | PA-3 |
| Il11ra1.1  | 1.26E-83  | 0.861  | 0.445 | 0.17  | 2.51E-79  | PA-3 |
| Ebf2.2     | 1.35E-83  | -0.863 | 0.94  | 0.979 | 2.70E-79  | PA-3 |
| Arhgap24.2 | 5.80E-83  | 0.838  | 0.976 | 0.892 | 1.16E-78  | PA-3 |
| Col1a1.2   | 9.10E-83  | 1.248  | 0.918 | 0.756 | 1.82E-78  | PA-3 |
| Myo1e.2    | 3.40E-82  | -1.172 | 0.245 | 0.586 | 6.78E-78  | PA-3 |
| Kank1.2    | 3.94E-82  | -1.377 | 0.118 | 0.467 | 7.87E-78  | PA-3 |
| Ppp2r2b.1  | 4.76E-82  | -1.660 | 0.114 | 0.473 | 9.50E-78  | PA-3 |
| Deptor.2   | 7.29E-82  | 0.999  | 0.583 | 0.273 | 1.46E-77  | PA-3 |
| Fbxl7.1    | 3.13E-80  | -1.083 | 0.617 | 0.848 | 6.24E-76  | PA-3 |
| Svep1.2    | 6.85E-80  | 1.012  | 0.826 | 0.578 | 1.37E-75  | PA-3 |
| Pdgfc.2    | 3.14E-78  | -1.398 | 0.177 | 0.518 | 6.26E-74  | PA-3 |
| Gan.2      | 3.58E-78  | -1.585 | 0.185 | 0.511 | 7.14E-74  | PA-3 |
| Bmp6.2     | 8.83E-78  | -1.618 | 0.045 | 0.379 | 1.76E-73  | PA-3 |
| Adamts16.2 | 2.29E-77  | -1.751 | 0.025 | 0.352 | 4.57E-73  | PA-3 |
| Pde5a      | 8.71E-77  | 0.696  | 0.277 | 0.072 | 1.74E-72  | PA-3 |
| Mfap5.2    | 1.66E-76  | -1.115 | 0.685 | 0.84  | 3.31E-72  | PA-3 |
| Col15a1.2  | 4.64E-76  | 0.627  | 0.439 | 0.156 | 9.26E-72  | PA-3 |
| Rras2.2    | 4.70E-76  | -1.265 | 0.141 | 0.482 | 9.38E-72  | PA-3 |
| Aldh1a3.2  | 6.77E-76  | -1.315 | 0.066 | 0.4   | 1.35E-71  | PA-3 |
| Ror1.2     | 1.50E-75  | 0.885  | 0.817 | 0.541 | 3.00E-71  | PA-3 |
| Ackr3.2    | 1.63E-75  | -1.157 | 0.384 | 0.678 | 3.24E-71  | PA-3 |
| Pde8a.2    | 3.63E-75  | -1.010 | 0.524 | 0.76  | 7.25E-71  | PA-3 |
| Nrip1.1    | 3.70E-75  | 0.917  | 0.861 | 0.728 | 7.39E-71  | PA-3 |
| Srgap1     | 1.36E-74  | -0.879 | 0.639 | 0.86  | 2.71E-70  | PA-3 |
| Myo5a.2    | 1.70E-74  | 0.702  | 0.506 | 0.214 | 3.39E-70  | PA-3 |
| Tmtc1      | 1.74E-74  | 1.029  | 0.639 | 0.353 | 3.47E-70  | PA-3 |
| Dennd4a.1  | 3.60E-74  | 1.067  | 0.695 | 0.427 | 7.19E-70  | PA-3 |
| Dact2.2    | 5.59E-74  | -1.485 | 0.03  | 0.347 | 1.12E-69  | PA-3 |
| Myo1d.1    | 3.28E-73  | 0.660  | 0.3   | 0.084 | 6.55E-69  | PA-3 |
| Adamts13.1 | 1.05E-72  | 0.945  | 0.622 | 0.32  | 2.09E-68  | PA-3 |
| Bcl2.1     | 1.91E-72  | 0.957  | 0.54  | 0.266 | 3.82E-68  | PA-3 |
| Cxcl12     | 1.12E-71  | 0.680  | 0.277 | 0.078 | 2.23E-67  | PA-3 |
| Sulf1.2    | 1.39E-71  | -0.891 | 0.735 | 0.873 | 2.78E-67  | PA-3 |
| Zfp462.2   | 2.03E-71  | -1.122 | 0.399 | 0.677 | 4.04E-67  | PA-3 |
| Ctsk       | 5.44E-71  | 0.836  | 0.333 | 0.114 | 1.09E-66  | PA-3 |
| Tanc2      | 7.92E-71  | -1.032 | 0.311 | 0.625 | 1.58E-66  | PA-3 |
| Gxylt2.1   | 2.06E-70  | 0.896  | 0.571 | 0.289 | 4.11E-66  | PA-3 |
| Mgll.2     | 6.56E-69  | -1.039 | 0.133 | 0.452 | 1.31E-64  | PA-3 |
| Pde3a      | 8.02E-69  | -1.067 | 0.418 | 0.707 | 1.60E-64  | PA-3 |

|           |          |        |       |       |          |      |
|-----------|----------|--------|-------|-------|----------|------|
| Gli2.2    | 2.46E-68 | 0.797  | 0.377 | 0.139 | 4.91E-64 | PA-3 |
| Nhs1.2    | 4.48E-68 | -0.959 | 0.542 | 0.768 | 8.94E-64 | PA-3 |
| Cgnl1     | 1.99E-67 | 0.623  | 0.276 | 0.08  | 3.97E-63 | PA-3 |
| Nr2f2     | 3.41E-67 | 0.718  | 0.265 | 0.075 | 6.80E-63 | PA-3 |
| Car8.2    | 6.45E-67 | -1.241 | 0.101 | 0.416 | 1.29E-62 | PA-3 |
| Mmp3.2    | 1.84E-66 | 1.332  | 0.422 | 0.176 | 3.67E-62 | PA-3 |
| Zeb1.1    | 4.74E-66 | -0.680 | 0.909 | 0.962 | 9.46E-62 | PA-3 |
| Dpyd      | 1.30E-65 | 0.868  | 0.573 | 0.294 | 2.59E-61 | PA-3 |
| Reps2.2   | 2.60E-65 | 0.754  | 0.57  | 0.288 | 5.19E-61 | PA-3 |
| Nhs       | 3.09E-65 | 0.894  | 0.352 | 0.125 | 6.17E-61 | PA-3 |
| Aff2      | 4.19E-65 | 0.983  | 0.618 | 0.34  | 8.36E-61 | PA-3 |
| Ddr2.2    | 1.27E-64 | -0.658 | 0.903 | 0.951 | 2.53E-60 | PA-3 |
| Stxbp5.2  | 1.28E-64 | -0.939 | 0.481 | 0.724 | 2.55E-60 | PA-3 |
| Thrb.1    | 1.51E-64 | 0.854  | 0.77  | 0.534 | 3.01E-60 | PA-3 |
| Dock10.2  | 3.35E-64 | 0.757  | 0.653 | 0.365 | 6.69E-60 | PA-3 |
| Basp1.2   | 3.50E-64 | -1.055 | 0.107 | 0.41  | 6.98E-60 | PA-3 |
| Man2a1.1  | 6.28E-64 | 0.793  | 0.913 | 0.798 | 1.25E-59 | PA-3 |
| Fmo1.1    | 1.11E-63 | 1.162  | 0.49  | 0.237 | 2.22E-59 | PA-3 |
| Srpx.1    | 2.62E-63 | 0.744  | 0.366 | 0.14  | 5.23E-59 | PA-3 |
| Sparcl1.2 | 4.06E-63 | 0.714  | 0.348 | 0.122 | 8.10E-59 | PA-3 |
| Slc4a4.2  | 5.55E-63 | -0.734 | 0.704 | 0.878 | 1.11E-58 | PA-3 |
| Pdzd2.2   | 1.51E-62 | -1.014 | 0.323 | 0.612 | 3.02E-58 | PA-3 |
| Col1a2.1  | 1.55E-62 | 0.883  | 0.98  | 0.938 | 3.10E-58 | PA-3 |
| Dock4.2   | 3.87E-62 | -0.891 | 0.738 | 0.872 | 7.72E-58 | PA-3 |
| Maf       | 4.10E-62 | -0.852 | 0.326 | 0.629 | 8.18E-58 | PA-3 |
| Ifi207.1  | 5.37E-62 | 0.749  | 0.794 | 0.582 | 1.07E-57 | PA-3 |
| Flnb.2    | 5.40E-62 | -0.943 | 0.418 | 0.672 | 1.08E-57 | PA-3 |
| Dock11.1  | 1.53E-61 | -0.831 | 0.438 | 0.708 | 3.05E-57 | PA-3 |
| Prr16.2   | 2.48E-61 | 1.030  | 0.428 | 0.185 | 4.96E-57 | PA-3 |
| Itpr1.1   | 4.70E-61 | 0.776  | 0.553 | 0.288 | 9.39E-57 | PA-3 |
| Gpc6.2    | 7.20E-61 | -0.672 | 0.959 | 0.981 | 1.44E-56 | PA-3 |
| Fgf2.2    | 1.09E-60 | -0.981 | 0.275 | 0.564 | 2.18E-56 | PA-3 |
| Sfrp2.1   | 1.75E-59 | 1.462  | 0.463 | 0.235 | 3.49E-55 | PA-3 |
| Tgfbr2.2  | 9.64E-59 | -0.790 | 0.609 | 0.797 | 1.92E-54 | PA-3 |
| Col12a1.1 | 1.26E-58 | -1.410 | 0.085 | 0.368 | 2.52E-54 | PA-3 |
| Adgrg2.2  | 1.94E-57 | -1.052 | 0.208 | 0.493 | 3.88E-53 | PA-3 |
| Syt12.2   | 3.25E-57 | -0.965 | 0.041 | 0.311 | 6.48E-53 | PA-3 |
| Fyn.2     | 3.21E-56 | -0.661 | 0.771 | 0.883 | 6.41E-52 | PA-3 |
| Eps8.2    | 4.21E-56 | 0.661  | 0.647 | 0.368 | 8.40E-52 | PA-3 |
| Gabra3.1  | 5.12E-56 | 1.016  | 0.71  | 0.478 | 1.02E-51 | PA-3 |
| Kif2a.2   | 6.19E-56 | -0.882 | 0.447 | 0.68  | 1.24E-51 | PA-3 |
| Clip1.2   | 1.68E-55 | -0.787 | 0.544 | 0.753 | 3.35E-51 | PA-3 |
| Armh4     | 2.10E-55 | 0.631  | 0.303 | 0.108 | 4.18E-51 | PA-3 |
| Pde7a.2   | 2.32E-55 | -0.815 | 0.238 | 0.53  | 4.63E-51 | PA-3 |
| Rgs6.2    | 2.75E-55 | -1.570 | 0.153 | 0.432 | 5.50E-51 | PA-3 |
| Dcbld2.1  | 6.21E-55 | -0.763 | 0.507 | 0.74  | 1.24E-50 | PA-3 |
| Dcn       | 6.90E-55 | 0.683  | 0.99  | 0.954 | 1.38E-50 | PA-3 |
| Asap2.1   | 7.78E-55 | -0.810 | 0.392 | 0.65  | 1.55E-50 | PA-3 |
| Figf.1    | 8.54E-55 | 0.811  | 0.429 | 0.191 | 1.70E-50 | PA-3 |
| Sbsn.2    | 1.23E-54 | -1.241 | 0.042 | 0.3   | 2.46E-50 | PA-3 |
| Slco3a1.2 | 1.27E-54 | -0.805 | 0.721 | 0.832 | 2.54E-50 | PA-3 |
| Smurf1.2  | 1.41E-54 | -0.864 | 0.351 | 0.617 | 2.81E-50 | PA-3 |
| Pde10a    | 2.21E-54 | -0.887 | 0.178 | 0.468 | 4.42E-50 | PA-3 |
| Naalad2   | 5.09E-54 | 0.646  | 0.33  | 0.126 | 1.02E-49 | PA-3 |
| Gas1.2    | 5.23E-54 | 0.857  | 0.496 | 0.265 | 1.04E-49 | PA-3 |
| Trim30d.2 | 5.44E-54 | -0.989 | 0.133 | 0.406 | 1.09E-49 | PA-3 |
| Emilin2.2 | 2.74E-53 | -0.883 | 0.35  | 0.602 | 5.46E-49 | PA-3 |
| Ltbp1.1   | 2.06E-52 | -0.666 | 0.729 | 0.874 | 4.12E-48 | PA-3 |
| Rhobtb1.1 | 2.12E-52 | 0.679  | 0.356 | 0.146 | 4.22E-48 | PA-3 |
| Abtb2     | 2.51E-52 | 0.783  | 0.463 | 0.227 | 5.00E-48 | PA-3 |
| Cers6.1   | 1.52E-51 | -0.817 | 0.313 | 0.576 | 3.03E-47 | PA-3 |
| Aff3.1    | 1.71E-51 | 0.791  | 0.641 | 0.403 | 3.41E-47 | PA-3 |

|           |          |        |       |       |          |      |
|-----------|----------|--------|-------|-------|----------|------|
| Dpep1     | 2.90E-51 | 0.750  | 0.663 | 0.443 | 5.79E-47 | PA-3 |
| Postn.1   | 1.28E-50 | -1.308 | 0.18  | 0.448 | 2.55E-46 | PA-3 |
| Fam13c.1  | 1.57E-50 | -0.818 | 0.179 | 0.451 | 3.13E-46 | PA-3 |
| Dock9.1   | 3.52E-50 | 0.823  | 0.675 | 0.447 | 7.02E-46 | PA-3 |
| Ugdh.2    | 4.36E-50 | -0.963 | 0.353 | 0.598 | 8.71E-46 | PA-3 |
| Adgrd1.2  | 6.55E-50 | -0.602 | 0.837 | 0.914 | 1.31E-45 | PA-3 |
| Spsb1.2   | 1.13E-49 | -0.903 | 0.291 | 0.537 | 2.26E-45 | PA-3 |
| Acvr2a.2  | 1.42E-49 | 0.841  | 0.672 | 0.449 | 2.83E-45 | PA-3 |
| Aldh1a1.1 | 3.45E-49 | 0.759  | 0.878 | 0.756 | 6.89E-45 | PA-3 |
| Col3a1.2  | 4.54E-49 | 0.803  | 0.993 | 0.976 | 9.06E-45 | PA-3 |
| Gm33869.1 | 4.72E-49 | -0.824 | 0.213 | 0.474 | 9.41E-45 | PA-3 |
| Ccn5      | 6.61E-49 | 0.638  | 0.265 | 0.091 | 1.32E-44 | PA-3 |
| Auts2.2   | 9.93E-49 | 0.615  | 0.866 | 0.66  | 1.98E-44 | PA-3 |
| Fnbp1.1   | 3.12E-48 | 0.658  | 0.609 | 0.37  | 6.23E-44 | PA-3 |
| Itga11.1  | 5.56E-48 | -0.824 | 0.264 | 0.531 | 1.11E-43 | PA-3 |
| Samhd1.2  | 7.09E-48 | -0.772 | 0.531 | 0.733 | 1.41E-43 | PA-3 |
| Hivep2.1  | 1.13E-47 | -0.600 | 0.858 | 0.936 | 2.25E-43 | PA-3 |
| Col14a1.2 | 1.70E-47 | -0.801 | 0.652 | 0.826 | 3.39E-43 | PA-3 |
| Prkca.2   | 5.22E-47 | -0.602 | 0.833 | 0.923 | 1.04E-42 | PA-3 |
| Rin3.2    | 5.54E-47 | -0.777 | 0.058 | 0.3   | 1.11E-42 | PA-3 |
| Marcks.2  | 9.93E-46 | -0.963 | 0.408 | 0.626 | 1.98E-41 | PA-3 |
| Plpp1.2   | 1.93E-45 | 0.728  | 0.505 | 0.272 | 3.84E-41 | PA-3 |
| Atp10d.1  | 1.96E-45 | 0.647  | 0.372 | 0.17  | 3.91E-41 | PA-3 |
| Daglb.2   | 4.22E-45 | -0.934 | 0.134 | 0.377 | 8.42E-41 | PA-3 |
| Fn1.2     | 7.17E-45 | -0.704 | 0.812 | 0.895 | 1.43E-40 | PA-3 |
| Srgap2    | 7.63E-45 | -0.558 | 0.743 | 0.883 | 1.52E-40 | PA-3 |
| Ebf3      | 8.09E-45 | -0.765 | 0.3   | 0.561 | 1.62E-40 | PA-3 |
| Anxa1.2   | 1.24E-44 | -0.742 | 0.439 | 0.667 | 2.48E-40 | PA-3 |
| Uap1.2    | 1.31E-44 | -0.913 | 0.484 | 0.672 | 2.62E-40 | PA-3 |
| Il18.2    | 2.13E-44 | -0.777 | 0.096 | 0.339 | 4.26E-40 | PA-3 |
| Fap.1     | 3.03E-44 | -0.713 | 0.592 | 0.787 | 6.04E-40 | PA-3 |
| Cp.2      | 4.12E-44 | 0.585  | 0.387 | 0.178 | 8.22E-40 | PA-3 |
| Phlda1    | 4.43E-44 | 0.609  | 0.291 | 0.116 | 8.85E-40 | PA-3 |
| Fam13a    | 4.59E-44 | 0.537  | 0.262 | 0.095 | 9.17E-40 | PA-3 |
| Rad51b.1  | 1.07E-43 | 0.619  | 0.803 | 0.585 | 2.14E-39 | PA-3 |
| Nptn.1    | 1.26E-43 | -0.670 | 0.642 | 0.78  | 2.51E-39 | PA-3 |
| Col4a4    | 1.34E-43 | 0.753  | 0.321 | 0.136 | 2.68E-39 | PA-3 |
| Adra1b.2  | 1.47E-43 | -0.827 | 0.044 | 0.266 | 2.94E-39 | PA-3 |
| Selenop.1 | 2.24E-43 | 0.837  | 0.364 | 0.173 | 4.48E-39 | PA-3 |
| Fbln1.1   | 5.52E-43 | 0.780  | 0.476 | 0.258 | 1.10E-38 | PA-3 |
| Msi2.1    | 6.11E-43 | -0.728 | 0.361 | 0.604 | 1.22E-38 | PA-3 |
| Fzd4      | 6.59E-43 | 0.574  | 0.301 | 0.127 | 1.32E-38 | PA-3 |
| Cask.1    | 1.91E-42 | -0.652 | 0.601 | 0.78  | 3.82E-38 | PA-3 |
| Cmip      | 2.05E-42 | -0.695 | 0.555 | 0.732 | 4.09E-38 | PA-3 |
| Notch2.1  | 2.27E-42 | -0.706 | 0.357 | 0.586 | 4.53E-38 | PA-3 |
| Ssh2      | 2.64E-42 | -0.585 | 0.764 | 0.887 | 5.27E-38 | PA-3 |
| Setbp1.2  | 6.20E-42 | 0.560  | 0.907 | 0.814 | 1.24E-37 | PA-3 |
| Illdr2.2  | 8.11E-42 | -0.974 | 0.295 | 0.508 | 1.62E-37 | PA-3 |
| Gask1b.2  | 1.15E-41 | 0.598  | 0.479 | 0.253 | 2.30E-37 | PA-3 |
| Trio      | 4.95E-41 | -0.584 | 0.649 | 0.802 | 9.87E-37 | PA-3 |
| Ecm1      | 7.55E-41 | 0.773  | 0.741 | 0.561 | 1.51E-36 | PA-3 |
| Atp2b1.2  | 2.06E-40 | -0.621 | 0.534 | 0.739 | 4.11E-36 | PA-3 |
| Maml3.2   | 3.19E-40 | 0.639  | 0.771 | 0.575 | 6.36E-36 | PA-3 |
| Serpinf1  | 3.86E-40 | 0.636  | 0.748 | 0.558 | 7.70E-36 | PA-3 |
| Itih5     | 4.57E-40 | -0.633 | 0.447 | 0.675 | 9.12E-36 | PA-3 |
| Carmil1   | 1.90E-39 | 0.557  | 0.577 | 0.358 | 3.79E-35 | PA-3 |
| Tbx15.1   | 5.29E-39 | 0.620  | 0.817 | 0.682 | 1.06E-34 | PA-3 |
| Cacnb4    | 1.17E-38 | -0.769 | 0.136 | 0.369 | 2.33E-34 | PA-3 |
| Dhrs3.2   | 1.33E-38 | 0.561  | 0.364 | 0.175 | 2.66E-34 | PA-3 |
| Sestd1.2  | 3.06E-38 | -0.699 | 0.49  | 0.678 | 6.10E-34 | PA-3 |
| Galnt17.1 | 3.32E-38 | 0.668  | 0.728 | 0.525 | 6.63E-34 | PA-3 |
| Mcc       | 3.80E-38 | -0.681 | 0.617 | 0.785 | 7.59E-34 | PA-3 |

|            |          |        |       |       |          |      |
|------------|----------|--------|-------|-------|----------|------|
| Arhgap42.1 | 7.82E-38 | -0.606 | 0.764 | 0.865 | 1.56E-33 | PA-3 |
| Itsn1      | 1.55E-37 | -0.604 | 0.537 | 0.729 | 3.09E-33 | PA-3 |
| Plcb4      | 1.81E-37 | 0.530  | 0.886 | 0.782 | 3.62E-33 | PA-3 |
| Rhoq.2     | 2.05E-37 | -0.685 | 0.439 | 0.635 | 4.10E-33 | PA-3 |
| Fgf7.1     | 5.12E-37 | 0.785  | 0.49  | 0.285 | 1.02E-32 | PA-3 |
| Megf9.1    | 5.78E-37 | -0.691 | 0.297 | 0.526 | 1.15E-32 | PA-3 |
| Il31ra     | 2.59E-36 | 0.735  | 0.442 | 0.252 | 5.16E-32 | PA-3 |
| Pdzrn3.2   | 2.76E-36 | 0.614  | 0.474 | 0.27  | 5.50E-32 | PA-3 |
| Heg1.1     | 2.98E-36 | -0.532 | 0.92  | 0.962 | 5.95E-32 | PA-3 |
| Lars2      | 3.13E-36 | 0.601  | 0.777 | 0.612 | 6.25E-32 | PA-3 |
| mt-Nd4l.1  | 3.66E-36 | 0.557  | 0.884 | 0.738 | 7.30E-32 | PA-3 |
| Negr1.2    | 4.60E-36 | -1.158 | 0.405 | 0.58  | 9.18E-32 | PA-3 |
| Cmss1      | 8.69E-36 | 0.554  | 0.919 | 0.769 | 1.74E-31 | PA-3 |
| Enox1.1    | 9.11E-36 | -0.705 | 0.398 | 0.615 | 1.82E-31 | PA-3 |
| Mtus1.1    | 1.21E-35 | 0.608  | 0.483 | 0.284 | 2.41E-31 | PA-3 |
| Cpeb1      | 2.12E-35 | 0.618  | 0.632 | 0.437 | 4.24E-31 | PA-3 |
| Il6ra.1    | 3.04E-35 | -0.688 | 0.312 | 0.525 | 6.07E-31 | PA-3 |
| Trps1.1    | 1.11E-34 | 0.650  | 0.379 | 0.193 | 2.22E-30 | PA-3 |
| Parp8.1    | 1.58E-34 | -0.723 | 0.454 | 0.644 | 3.16E-30 | PA-3 |
| Plpp3.2    | 1.68E-34 | -0.658 | 0.807 | 0.891 | 3.35E-30 | PA-3 |
| Phlpp1.1   | 1.99E-34 | -0.630 | 0.562 | 0.728 | 3.97E-30 | PA-3 |
| C4b        | 1.03E-33 | 0.848  | 0.48  | 0.295 | 2.06E-29 | PA-3 |
| Pik3r1.1   | 1.57E-33 | 0.560  | 0.816 | 0.683 | 3.14E-29 | PA-3 |
| Glp2r.1    | 1.80E-33 | -0.796 | 0.068 | 0.26  | 3.59E-29 | PA-3 |
| Khdrbs3    | 2.34E-33 | 0.508  | 0.281 | 0.125 | 4.67E-29 | PA-3 |
| lqsec1.2   | 2.55E-33 | -0.678 | 0.281 | 0.481 | 5.09E-29 | PA-3 |
| Lims2.2    | 3.24E-33 | -0.633 | 0.461 | 0.642 | 6.47E-29 | PA-3 |
| Myof.1     | 1.28E-32 | -0.547 | 0.624 | 0.762 | 2.56E-28 | PA-3 |
| Olfr1033   | 3.96E-32 | 0.899  | 0.495 | 0.317 | 7.91E-28 | PA-3 |
| Gm48542    | 9.69E-32 | -0.630 | 0.154 | 0.36  | 1.93E-27 | PA-3 |
| Disp1.2    | 1.13E-31 | -0.630 | 0.315 | 0.528 | 2.25E-27 | PA-3 |
| Nr1h4.2    | 2.72E-31 | -0.900 | 0.235 | 0.426 | 5.44E-27 | PA-3 |
| Dbn1.2     | 3.23E-31 | -0.632 | 0.228 | 0.424 | 6.44E-27 | PA-3 |
| Arhgef28.2 | 4.00E-31 | -0.701 | 0.493 | 0.649 | 7.98E-27 | PA-3 |
| Cd47.1     | 5.80E-31 | -0.525 | 0.624 | 0.752 | 1.16E-26 | PA-3 |
| Sh3rf3.2   | 5.94E-31 | 0.594  | 0.46  | 0.273 | 1.19E-26 | PA-3 |
| Adamts12.2 | 6.57E-31 | 0.508  | 0.937 | 0.828 | 1.31E-26 | PA-3 |
| Glce.2     | 7.56E-31 | -0.688 | 0.265 | 0.468 | 1.51E-26 | PA-3 |
| Abca8a.2   | 1.07E-30 | 0.568  | 0.822 | 0.661 | 2.14E-26 | PA-3 |
| Procr.2    | 1.30E-30 | -0.709 | 0.173 | 0.368 | 2.60E-26 | PA-3 |
| Pdgfra     | 1.59E-30 | 0.516  | 0.785 | 0.667 | 3.18E-26 | PA-3 |
| Ptgis.1    | 1.60E-30 | -0.570 | 0.129 | 0.326 | 3.19E-26 | PA-3 |
| Ptprk.1    | 2.48E-30 | 0.725  | 0.397 | 0.228 | 4.95E-26 | PA-3 |
| Adamts11.2 | 2.60E-30 | -0.622 | 0.836 | 0.909 | 5.20E-26 | PA-3 |
| Lama4      | 2.73E-30 | -0.521 | 0.745 | 0.839 | 5.46E-26 | PA-3 |
| Kdm7a      | 3.28E-30 | -0.568 | 0.417 | 0.62  | 6.56E-26 | PA-3 |
| Tbc1d12.2  | 4.80E-30 | -0.619 | 0.423 | 0.608 | 9.59E-26 | PA-3 |
| Cdh9.1     | 8.96E-30 | -0.758 | 0.194 | 0.393 | 1.79E-25 | PA-3 |
| Lsp1       | 9.88E-30 | -0.560 | 0.368 | 0.569 | 1.97E-25 | PA-3 |
| Cacna1a.1  | 1.67E-29 | 0.567  | 0.639 | 0.469 | 3.33E-25 | PA-3 |
| Epb41l3.1  | 2.79E-29 | -0.663 | 0.236 | 0.431 | 5.57E-25 | PA-3 |
| Atp5o      | 3.02E-29 | -0.624 | 0.199 | 0.404 | 6.04E-25 | PA-3 |
| Ecm2       | 5.23E-29 | 0.528  | 0.373 | 0.208 | 1.04E-24 | PA-3 |
| Sned1.2    | 8.50E-29 | 0.644  | 0.48  | 0.305 | 1.70E-24 | PA-3 |
| Arhgap29   | 8.63E-29 | -0.574 | 0.424 | 0.612 | 1.72E-24 | PA-3 |
| Ntn4.2     | 1.08E-28 | -0.736 | 0.323 | 0.514 | 2.16E-24 | PA-3 |
| Lamb1      | 1.14E-28 | -0.626 | 0.205 | 0.405 | 2.27E-24 | PA-3 |
| Clcn5      | 2.06E-28 | -0.635 | 0.312 | 0.502 | 4.11E-24 | PA-3 |
| Tlr4.1     | 2.92E-28 | -0.625 | 0.342 | 0.531 | 5.83E-24 | PA-3 |
| Klf12.2    | 3.47E-28 | -0.685 | 0.505 | 0.678 | 6.92E-24 | PA-3 |
| Clasp1     | 7.56E-28 | -0.523 | 0.48  | 0.651 | 1.51E-23 | PA-3 |
| Ngf        | 8.30E-28 | -0.703 | 0.103 | 0.279 | 1.66E-23 | PA-3 |

|           |          |        |       |       |          |      |
|-----------|----------|--------|-------|-------|----------|------|
| Tmtc2.2   | 2.36E-27 | -1.020 | 0.153 | 0.332 | 4.70E-23 | PA-3 |
| Pxdn      | 2.38E-27 | -0.599 | 0.265 | 0.459 | 4.75E-23 | PA-3 |
| Gpc3      | 2.43E-27 | 0.565  | 0.529 | 0.339 | 4.85E-23 | PA-3 |
| Hexb      | 6.09E-27 | 0.531  | 0.592 | 0.424 | 1.22E-22 | PA-3 |
| Nckap5.2  | 6.81E-27 | 0.533  | 0.716 | 0.556 | 1.36E-22 | PA-3 |
| Ogn.1     | 7.02E-27 | -0.641 | 0.47  | 0.64  | 1.40E-22 | PA-3 |
| Aig1.1    | 8.24E-27 | -0.618 | 0.353 | 0.548 | 1.65E-22 | PA-3 |
| Osr1      | 9.27E-27 | 0.515  | 0.364 | 0.213 | 1.85E-22 | PA-3 |
| Dpt.2     | 1.62E-26 | -0.746 | 0.56  | 0.71  | 3.24E-22 | PA-3 |
| Fam20a.1  | 2.62E-26 | -0.569 | 0.372 | 0.55  | 5.22E-22 | PA-3 |
| Sfrp4     | 2.82E-26 | 0.984  | 0.485 | 0.347 | 5.63E-22 | PA-3 |
| Ror2      | 2.99E-26 | -0.603 | 0.178 | 0.365 | 5.97E-22 | PA-3 |
| Runx1t1   | 7.80E-26 | 0.512  | 0.703 | 0.53  | 1.56E-21 | PA-3 |
| Agpat4    | 8.09E-26 | -0.578 | 0.23  | 0.413 | 1.62E-21 | PA-3 |
| Klf2.2    | 9.65E-26 | -0.599 | 0.158 | 0.337 | 1.93E-21 | PA-3 |
| Micu1.1   | 1.05E-25 | -0.526 | 0.399 | 0.579 | 2.10E-21 | PA-3 |
| Lamb2     | 1.28E-25 | 0.584  | 0.515 | 0.367 | 2.56E-21 | PA-3 |
| Serpinh1  | 1.74E-25 | 0.532  | 0.582 | 0.425 | 3.47E-21 | PA-3 |
| Wnt2.2    | 5.10E-25 | -0.624 | 0.104 | 0.268 | 1.02E-20 | PA-3 |
| Immp2l    | 8.61E-25 | -0.683 | 0.405 | 0.571 | 1.72E-20 | PA-3 |
| Prss23.2  | 1.27E-24 | -0.722 | 0.302 | 0.461 | 2.53E-20 | PA-3 |
| Jpt1.1    | 3.74E-24 | -0.502 | 0.173 | 0.348 | 7.46E-20 | PA-3 |
| Zdhhc14.1 | 5.55E-24 | 0.502  | 0.455 | 0.292 | 1.11E-19 | PA-3 |
| Kctd9.1   | 7.17E-24 | -0.508 | 0.259 | 0.446 | 1.43E-19 | PA-3 |
| Abca5.2   | 7.43E-24 | -0.531 | 0.198 | 0.374 | 1.48E-19 | PA-3 |
| Meis1     | 1.14E-23 | -0.526 | 0.352 | 0.536 | 2.28E-19 | PA-3 |
| Snta1     | 1.17E-22 | 0.509  | 0.341 | 0.198 | 2.34E-18 | PA-3 |
| Pdgfd.2   | 2.46E-22 | -0.530 | 0.71  | 0.817 | 4.92E-18 | PA-3 |
| Il1rl2.1  | 3.39E-22 | -0.525 | 0.552 | 0.701 | 6.76E-18 | PA-3 |
| Pdlim1    | 3.90E-22 | -0.525 | 0.272 | 0.443 | 7.79E-18 | PA-3 |
| Pex13     | 1.00E-21 | -0.506 | 0.17  | 0.335 | 2.00E-17 | PA-3 |
| Lmx1a.1   | 1.85E-20 | -0.544 | 0.16  | 0.318 | 3.70E-16 | PA-3 |
| Klhl29.1  | 9.99E-20 | -0.579 | 0.484 | 0.611 | 1.99E-15 | PA-3 |
| Ugp2.1    | 1.13E-19 | -0.544 | 0.526 | 0.64  | 2.26E-15 | PA-3 |
| Greb1l    | 1.50E-19 | 0.503  | 0.267 | 0.144 | 2.99E-15 | PA-3 |
| Tmem100.2 | 8.48E-19 | -0.521 | 0.218 | 0.37  | 1.69E-14 | PA-3 |
| Eln.1     | 1.26E-18 | 0.508  | 0.749 | 0.63  | 2.51E-14 | PA-3 |
| Sult1e1.1 | 1.88E-18 | 0.756  | 0.341 | 0.21  | 3.75E-14 | PA-3 |
| Ccser1    | 4.33E-18 | -0.669 | 0.173 | 0.319 | 8.64E-14 | PA-3 |
| Eya4.2    | 5.61E-18 | -0.619 | 0.29  | 0.44  | 1.12E-13 | PA-3 |
| Apod      | 1.20E-17 | 0.557  | 0.45  | 0.324 | 2.40E-13 | PA-3 |
| Smpd3.2   | 2.81E-17 | -0.788 | 0.45  | 0.571 | 5.61E-13 | PA-3 |
| Adcy2.1   | 5.61E-17 | -0.516 | 0.284 | 0.432 | 1.12E-12 | PA-3 |
| Jag1.2    | 3.54E-16 | -0.535 | 0.281 | 0.414 | 7.06E-12 | PA-3 |
| Vegfd.1   | 3.84E-16 | -0.542 | 0.259 | 0.389 | 7.67E-12 | PA-3 |
| Hpgd.1    | 1.77E-15 | -0.518 | 0.197 | 0.33  | 3.53E-11 | PA-3 |
| Fhl1.2    | 2.98E-15 | -0.504 | 0.284 | 0.409 | 5.95E-11 | PA-3 |
| Pde7b     | 6.90E-15 | -0.564 | 0.226 | 0.356 | 1.38E-10 | PA-3 |
| Errfi1.1  | 8.03E-15 | 0.604  | 0.754 | 0.673 | 1.60E-10 | PA-3 |
| Kitl.1    | 4.08E-14 | 0.509  | 0.427 | 0.309 | 8.13E-10 | PA-3 |
| Mbd1      | 4.21E-13 | 0.551  | 0.286 | 0.187 | 8.41E-09 | PA-3 |
| Cd248.2   | 5.51E-13 | -0.546 | 0.387 | 0.489 | 1.10E-08 | PA-3 |
| Sntg1.2   | 1.32E-12 | -0.882 | 0.366 | 0.472 | 2.63E-08 | PA-3 |
| Dmd       | 5.47E-11 | 0.672  | 0.499 | 0.413 | 1.09E-06 | PA-3 |
| Rnf220.2  | 2.39E-10 | -0.632 | 0.183 | 0.273 | 4.78E-06 | PA-3 |
| Top2a     | 0        | 2.227  | 0.637 | 0.005 | 0        | PA-4 |
| Neil3     | 0        | 1.985  | 0.646 | 0.007 | 0        | PA-4 |
| Kn1l      | 0        | 1.903  | 0.619 | 0.006 | 0        | PA-4 |
| Kif15     | 0        | 1.791  | 0.637 | 0.008 | 0        | PA-4 |
| Mki67     | 0        | 1.715  | 0.566 | 0.004 | 0        | PA-4 |
| Kif11     | 0        | 1.668  | 0.566 | 0.009 | 0        | PA-4 |
| Kif4      | 0        | 1.623  | 0.566 | 0.003 | 0        | PA-4 |

|          |           |       |       |       |           |      |
|----------|-----------|-------|-------|-------|-----------|------|
| Tpx2     | 0         | 1.620 | 0.584 | 0.006 | 0         | PA-4 |
| Efcab11  | 0         | 1.554 | 0.566 | 0.014 | 0         | PA-4 |
| Prc1     | 0         | 1.471 | 0.487 | 0.005 | 0         | PA-4 |
| Zwilch   | 0         | 1.438 | 0.611 | 0.018 | 0         | PA-4 |
| Racgap1  | 0         | 1.418 | 0.504 | 0.004 | 0         | PA-4 |
| Cit      | 0         | 1.378 | 0.549 | 0.009 | 0         | PA-4 |
| Cenpe    | 0         | 1.348 | 0.442 | 0.004 | 0         | PA-4 |
| Mis18bp1 | 0         | 1.304 | 0.46  | 0.006 | 0         | PA-4 |
| Brca1    | 0         | 1.298 | 0.513 | 0.008 | 0         | PA-4 |
| Iqgap3   | 0         | 1.296 | 0.425 | 0.003 | 0         | PA-4 |
| Kntc1    | 0         | 1.241 | 0.487 | 0.005 | 0         | PA-4 |
| Cenph    | 0         | 1.169 | 0.487 | 0.005 | 0         | PA-4 |
| Cenpi    | 0         | 1.037 | 0.442 | 0.006 | 0         | PA-4 |
| Kif23    | 0         | 1.034 | 0.372 | 0.003 | 0         | PA-4 |
| Depdc1a  | 0         | 1.029 | 0.389 | 0.002 | 0         | PA-4 |
| Rad54b   | 0         | 0.977 | 0.389 | 0.004 | 0         | PA-4 |
| Melk     | 0         | 0.974 | 0.407 | 0.002 | 0         | PA-4 |
| Bub1     | 0         | 0.968 | 0.389 | 0     | 0         | PA-4 |
| Shcbp1   | 0         | 0.935 | 0.407 | 0.003 | 0         | PA-4 |
| Hmmr     | 0         | 0.912 | 0.31  | 0.001 | 0         | PA-4 |
| Ttk      | 0         | 0.897 | 0.363 | 0.003 | 0         | PA-4 |
| Ncapg    | 0         | 0.872 | 0.354 | 0.002 | 0         | PA-4 |
| Ckap2l   | 0         | 0.857 | 0.372 | 0.004 | 0         | PA-4 |
| Bub1b    | 3.41E-306 | 0.845 | 0.354 | 0.004 | 6.81E-302 | PA-4 |
| Cenpf    | 4.53E-305 | 1.388 | 0.381 | 0.005 | 9.05E-301 | PA-4 |
| Pbk      | 6.74E-296 | 0.653 | 0.265 | 0.001 | 1.34E-291 | PA-4 |
| Sgo1     | 3.12E-293 | 0.726 | 0.292 | 0.002 | 6.23E-289 | PA-4 |
| Kif14    | 2.53E-290 | 0.782 | 0.31  | 0.003 | 5.06E-286 | PA-4 |
| Ckap2    | 1.07E-284 | 1.221 | 0.425 | 0.008 | 2.14E-280 | PA-4 |
| Sgo2a    | 5.38E-283 | 0.928 | 0.354 | 0.004 | 1.07E-278 | PA-4 |
| Kifc1    | 9.94E-279 | 0.698 | 0.31  | 0.003 | 1.98E-274 | PA-4 |
| Dlgap5   | 9.06E-278 | 0.717 | 0.274 | 0.002 | 1.81E-273 | PA-4 |
| Birc5    | 2.92E-276 | 0.542 | 0.257 | 0.001 | 5.82E-272 | PA-4 |
| Dtl      | 1.04E-272 | 1.238 | 0.398 | 0.007 | 2.08E-268 | PA-4 |
| Aspm     | 3.29E-269 | 0.993 | 0.319 | 0.003 | 6.57E-265 | PA-4 |
| Nuf2     | 1.61E-268 | 0.570 | 0.257 | 0.001 | 3.21E-264 | PA-4 |
| Cep55    | 2.33E-266 | 0.720 | 0.265 | 0.002 | 4.66E-262 | PA-4 |
| Ndc80    | 1.35E-258 | 0.727 | 0.301 | 0.003 | 2.70E-254 | PA-4 |
| Spag5    | 8.74E-255 | 0.714 | 0.257 | 0.002 | 1.75E-250 | PA-4 |
| Trim59   | 1.99E-252 | 0.763 | 0.292 | 0.003 | 3.98E-248 | PA-4 |
| Ect2     | 7.32E-246 | 1.613 | 0.531 | 0.018 | 1.46E-241 | PA-4 |
| Tk1      | 1.79E-242 | 0.543 | 0.257 | 0.002 | 3.57E-238 | PA-4 |
| Anln     | 5.92E-242 | 2.086 | 0.628 | 0.028 | 1.18E-237 | PA-4 |
| Kif20b   | 1.34E-232 | 1.221 | 0.469 | 0.014 | 2.67E-228 | PA-4 |
| Uhrf1    | 2.24E-231 | 0.611 | 0.265 | 0.003 | 4.46E-227 | PA-4 |
| Cenpk    | 1.03E-227 | 1.124 | 0.522 | 0.019 | 2.05E-223 | PA-4 |
| Mastl    | 3.23E-226 | 1.257 | 0.504 | 0.018 | 6.44E-222 | PA-4 |
| Gen1     | 7.41E-221 | 0.865 | 0.336 | 0.006 | 1.48E-216 | PA-4 |
| Ccdc18   | 8.56E-218 | 0.922 | 0.292 | 0.004 | 1.71E-213 | PA-4 |
| Kif22    | 1.23E-212 | 0.804 | 0.265 | 0.003 | 2.45E-208 | PA-4 |
| Fanci    | 3.40E-209 | 0.761 | 0.301 | 0.005 | 6.78E-205 | PA-4 |
| Prr11    | 2.10E-206 | 0.648 | 0.257 | 0.003 | 4.19E-202 | PA-4 |
| Cdca2    | 1.21E-204 | 1.170 | 0.469 | 0.017 | 2.42E-200 | PA-4 |
| Bard1    | 2.19E-203 | 1.238 | 0.416 | 0.013 | 4.37E-199 | PA-4 |
| Fanca    | 1.48E-201 | 0.859 | 0.372 | 0.01  | 2.96E-197 | PA-4 |
| Polq     | 2.22E-201 | 0.895 | 0.389 | 0.011 | 4.44E-197 | PA-4 |
| Stil     | 3.05E-198 | 0.907 | 0.398 | 0.012 | 6.08E-194 | PA-4 |
| Rmi2     | 2.85E-194 | 0.897 | 0.31  | 0.006 | 5.68E-190 | PA-4 |
| Cip2a    | 5.26E-191 | 0.729 | 0.283 | 0.005 | 1.05E-186 | PA-4 |
| Clspn    | 1.68E-183 | 0.956 | 0.372 | 0.011 | 3.34E-179 | PA-4 |
| Figl1    | 1.04E-175 | 0.603 | 0.274 | 0.005 | 2.08E-171 | PA-4 |
| Ncapg2   | 3.25E-168 | 1.759 | 0.619 | 0.043 | 6.48E-164 | PA-4 |



|          |           |       |       |       |           |      |
|----------|-----------|-------|-------|-------|-----------|------|
| Incenp   | 9.13E-163 | 1.002 | 0.416 | 0.018 | 1.82E-158 | PA-4 |
| Pole     | 1.76E-160 | 1.030 | 0.434 | 0.02  | 3.51E-156 | PA-4 |
| Slfn9    | 2.50E-160 | 0.797 | 0.319 | 0.009 | 5.00E-156 | PA-4 |
| Brip1    | 2.46E-152 | 1.709 | 0.575 | 0.04  | 4.92E-148 | PA-4 |
| Rad51    | 1.71E-150 | 1.000 | 0.398 | 0.017 | 3.41E-146 | PA-4 |
| Ccnf     | 4.88E-149 | 0.835 | 0.283 | 0.008 | 9.74E-145 | PA-4 |
| Diaph3   | 1.24E-148 | 3.489 | 0.965 | 0.159 | 2.48E-144 | PA-4 |
| Dbf4     | 1.25E-145 | 0.799 | 0.319 | 0.011 | 2.49E-141 | PA-4 |
| Espl1    | 9.09E-133 | 0.685 | 0.274 | 0.009 | 1.81E-128 | PA-4 |
| Smc2     | 4.50E-130 | 1.129 | 0.513 | 0.037 | 8.99E-126 | PA-4 |
| Mms22l   | 2.00E-129 | 1.868 | 0.664 | 0.067 | 3.99E-125 | PA-4 |
| Nusap1   | 2.30E-114 | 1.076 | 0.381 | 0.022 | 4.60E-110 | PA-4 |
| Tacc3    | 1.50E-112 | 0.746 | 0.283 | 0.012 | 2.99E-108 | PA-4 |
| Ncapd2   | 3.12E-107 | 1.191 | 0.504 | 0.044 | 6.22E-103 | PA-4 |
| Blm      | 3.38E-103 | 1.001 | 0.469 | 0.038 | 6.74E-99  | PA-4 |
| Kif24    | 1.87E-101 | 1.259 | 0.549 | 0.055 | 3.73E-97  | PA-4 |
| Wdhd1    | 2.35E-100 | 1.050 | 0.425 | 0.032 | 4.70E-96  | PA-4 |
| Zgrf1    | 4.21E-95  | 1.230 | 0.522 | 0.053 | 8.39E-91  | PA-4 |
| Atad2    | 6.74E-90  | 1.911 | 0.796 | 0.151 | 1.34E-85  | PA-4 |
| Nav2     | 4.44E-86  | 1.364 | 0.363 | 0.028 | 8.85E-82  | PA-4 |
| Cenpp    | 2.66E-85  | 2.590 | 0.858 | 0.204 | 5.31E-81  | PA-4 |
| Smc4     | 1.23E-84  | 1.657 | 0.664 | 0.104 | 2.46E-80  | PA-4 |
| Zfp367   | 2.02E-84  | 0.811 | 0.319 | 0.022 | 4.04E-80  | PA-4 |
| Brca2    | 6.55E-83  | 0.838 | 0.381 | 0.032 | 1.31E-78  | PA-4 |
| Plk4     | 1.64E-79  | 0.570 | 0.301 | 0.02  | 3.27E-75  | PA-4 |
| Ezh2     | 7.53E-73  | 1.928 | 0.814 | 0.191 | 1.50E-68  | PA-4 |
| Fancd2   | 1.02E-70  | 0.683 | 0.327 | 0.027 | 2.04E-66  | PA-4 |
| BC055324 | 5.91E-69  | 0.604 | 0.274 | 0.019 | 1.18E-64  | PA-4 |
| Mybl1    | 2.02E-67  | 0.831 | 0.389 | 0.041 | 4.03E-63  | PA-4 |
| Atad5    | 1.90E-66  | 1.126 | 0.478 | 0.062 | 3.79E-62  | PA-4 |
| Lig1     | 1.14E-64  | 0.699 | 0.301 | 0.026 | 2.28E-60  | PA-4 |
| Rrm1     | 1.66E-63  | 1.092 | 0.522 | 0.078 | 3.31E-59  | PA-4 |
| Tyms     | 7.31E-63  | 0.878 | 0.381 | 0.042 | 1.46E-58  | PA-4 |
| Rad18    | 3.70E-61  | 1.303 | 0.637 | 0.121 | 7.39E-57  | PA-4 |
| E2f7     | 5.98E-60  | 1.052 | 0.575 | 0.096 | 1.19E-55  | PA-4 |
| Hells    | 1.08E-59  | 1.226 | 0.531 | 0.084 | 2.15E-55  | PA-4 |
| Ndc1     | 8.07E-55  | 0.690 | 0.354 | 0.041 | 1.61E-50  | PA-4 |
| Prim2    | 3.89E-52  | 1.555 | 0.779 | 0.227 | 7.76E-48  | PA-4 |
| Zranb3   | 4.80E-52  | 0.739 | 0.336 | 0.039 | 9.59E-48  | PA-4 |
| Nsd2     | 3.46E-50  | 1.705 | 0.85  | 0.315 | 6.91E-46  | PA-4 |
| Cep128   | 2.52E-49  | 1.654 | 0.823 | 0.28  | 5.03E-45  | PA-4 |
| Pola1    | 4.49E-49  | 1.933 | 0.841 | 0.326 | 8.96E-45  | PA-4 |
| Cdc7     | 5.50E-49  | 0.913 | 0.469 | 0.078 | 1.10E-44  | PA-4 |
| Prim1    | 4.00E-47  | 0.701 | 0.274 | 0.029 | 7.98E-43  | PA-4 |
| Kif18a   | 1.37E-45  | 0.660 | 0.292 | 0.034 | 2.74E-41  | PA-4 |
| Rbl1     | 1.58E-45  | 1.031 | 0.54  | 0.109 | 3.15E-41  | PA-4 |
| Fbxo5    | 2.76E-45  | 0.614 | 0.257 | 0.026 | 5.50E-41  | PA-4 |
| Tmpo     | 3.45E-44  | 1.455 | 0.77  | 0.255 | 6.88E-40  | PA-4 |
| Cep57l1  | 2.01E-42  | 0.869 | 0.478 | 0.091 | 4.02E-38  | PA-4 |
| Bora     | 1.50E-41  | 0.748 | 0.274 | 0.033 | 3.00E-37  | PA-4 |
| Ncam1    | 2.76E-41  | 1.134 | 0.265 | 0.031 | 5.52E-37  | PA-4 |
| Rangap1  | 7.08E-41  | 0.646 | 0.372 | 0.058 | 1.41E-36  | PA-4 |
| Lmnbl1   | 4.12E-39  | 1.184 | 0.611 | 0.165 | 8.22E-35  | PA-4 |
| Mthfd1l  | 2.96E-38  | 0.940 | 0.434 | 0.083 | 5.92E-34  | PA-4 |
| Haus6    | 8.28E-38  | 0.774 | 0.451 | 0.089 | 1.65E-33  | PA-4 |
| Ncapd3   | 1.85E-37  | 0.916 | 0.487 | 0.107 | 3.68E-33  | PA-4 |
| Pbx3     | 9.67E-36  | 1.326 | 0.885 | 0.396 | 1.93E-31  | PA-4 |
| Topbp1   | 1.20E-35  | 1.050 | 0.584 | 0.159 | 2.40E-31  | PA-4 |
| Hjurp    | 2.26E-35  | 1.366 | 0.796 | 0.36  | 4.50E-31  | PA-4 |
| Nemp1    | 3.13E-35  | 0.512 | 0.327 | 0.051 | 6.24E-31  | PA-4 |
| Dnmt1    | 3.72E-34  | 0.658 | 0.398 | 0.077 | 7.43E-30  | PA-4 |
| Ska2     | 1.67E-33  | 0.717 | 0.442 | 0.094 | 3.34E-29  | PA-4 |

|            |          |        |       |       |          |      |
|------------|----------|--------|-------|-------|----------|------|
| Cep192     | 5.71E-33 | 1.021  | 0.681 | 0.219 | 1.14E-28 | PA-4 |
| Cchcr1     | 4.52E-32 | 0.709  | 0.381 | 0.075 | 9.03E-28 | PA-4 |
| Pkp4       | 1.80E-31 | 0.646  | 0.381 | 0.074 | 3.59E-27 | PA-4 |
| Mcm6       | 4.37E-31 | 0.587  | 0.265 | 0.04  | 8.73E-27 | PA-4 |
| Hat1       | 1.45E-30 | 0.901  | 0.531 | 0.139 | 2.90E-26 | PA-4 |
| Cep152     | 1.87E-30 | 0.738  | 0.451 | 0.104 | 3.74E-26 | PA-4 |
| Skp2       | 7.42E-30 | 0.615  | 0.354 | 0.069 | 1.48E-25 | PA-4 |
| Nup155     | 1.80E-29 | 0.719  | 0.54  | 0.144 | 3.60E-25 | PA-4 |
| Polh       | 3.73E-29 | 0.695  | 0.381 | 0.081 | 7.44E-25 | PA-4 |
| Tenm3      | 7.21E-29 | 1.131  | 0.301 | 0.054 | 1.44E-24 | PA-4 |
| Sass6      | 2.02E-28 | 0.508  | 0.283 | 0.048 | 4.02E-24 | PA-4 |
| Bcat1      | 3.33E-28 | 0.716  | 0.389 | 0.085 | 6.64E-24 | PA-4 |
| Arnt2      | 3.44E-28 | 0.648  | 0.292 | 0.051 | 6.86E-24 | PA-4 |
| Wdr76      | 4.29E-28 | 0.666  | 0.319 | 0.061 | 8.56E-24 | PA-4 |
| BC052040   | 7.62E-28 | 0.899  | 0.628 | 0.194 | 1.52E-23 | PA-4 |
| Cdh2       | 2.58E-27 | 1.078  | 0.381 | 0.087 | 5.14E-23 | PA-4 |
| Ranbp17    | 2.75E-27 | 1.109  | 0.549 | 0.171 | 5.50E-23 | PA-4 |
| Rad51b.2   | 1.11E-26 | 1.210  | 0.938 | 0.607 | 2.21E-22 | PA-4 |
| Rfwd3      | 1.69E-26 | 0.715  | 0.496 | 0.135 | 3.37E-22 | PA-4 |
| Lin54      | 5.57E-26 | 0.695  | 0.451 | 0.117 | 1.11E-21 | PA-4 |
| Pde3b      | 4.48E-25 | 0.563  | 0.363 | 0.081 | 8.93E-21 | PA-4 |
| Rttm       | 6.58E-25 | 0.735  | 0.54  | 0.164 | 1.31E-20 | PA-4 |
| Sdk1.3     | 1.10E-24 | 0.948  | 1     | 0.913 | 2.20E-20 | PA-4 |
| Map4       | 1.34E-24 | 0.974  | 0.929 | 0.662 | 2.68E-20 | PA-4 |
| Mtbp       | 1.58E-24 | 0.574  | 0.345 | 0.076 | 3.15E-20 | PA-4 |
| Platr25    | 3.40E-24 | 0.869  | 0.522 | 0.168 | 6.79E-20 | PA-4 |
| Cd44       | 3.93E-24 | 1.589  | 0.619 | 0.24  | 7.85E-20 | PA-4 |
| Cbx5       | 1.18E-23 | 1.059  | 0.726 | 0.322 | 2.36E-19 | PA-4 |
| Cdk2       | 1.49E-23 | 0.518  | 0.283 | 0.056 | 2.98E-19 | PA-4 |
| Lhfp12     | 2.18E-23 | 0.828  | 0.602 | 0.217 | 4.36E-19 | PA-4 |
| Plcb1.1    | 2.72E-23 | 1.086  | 0.637 | 0.235 | 5.42E-19 | PA-4 |
| Gjc1       | 9.72E-23 | 0.776  | 0.469 | 0.141 | 1.94E-18 | PA-4 |
| Lbr        | 1.68E-22 | 0.521  | 0.407 | 0.106 | 3.34E-18 | PA-4 |
| Cntln      | 3.92E-22 | 0.984  | 0.876 | 0.469 | 7.83E-18 | PA-4 |
| Rora.2     | 7.40E-22 | -1.061 | 0.965 | 0.978 | 1.48E-17 | PA-4 |
| Dcn.1      | 8.34E-22 | -1.396 | 0.92  | 0.96  | 1.67E-17 | PA-4 |
| Lin9       | 2.07E-21 | 0.503  | 0.265 | 0.053 | 4.13E-17 | PA-4 |
| Rpa1       | 2.14E-21 | 0.676  | 0.425 | 0.12  | 4.27E-17 | PA-4 |
| Celf2      | 2.46E-21 | -0.671 | 1     | 0.997 | 4.91E-17 | PA-4 |
| Myh9.1     | 2.91E-21 | 0.818  | 0.637 | 0.242 | 5.81E-17 | PA-4 |
| Vrk1       | 4.33E-21 | 0.631  | 0.372 | 0.099 | 8.63E-17 | PA-4 |
| Zdhhc15    | 4.64E-21 | 0.546  | 0.292 | 0.064 | 9.26E-17 | PA-4 |
| Suz12      | 9.75E-21 | 0.807  | 0.699 | 0.293 | 1.95E-16 | PA-4 |
| Rbbp8      | 2.20E-20 | 0.786  | 0.513 | 0.181 | 4.39E-16 | PA-4 |
| Serping1.1 | 2.66E-20 | -1.556 | 0.566 | 0.786 | 5.30E-16 | PA-4 |
| Postn.2    | 1.16E-19 | 1.050  | 0.805 | 0.407 | 2.31E-15 | PA-4 |
| Dot1l      | 2.00E-19 | 0.554  | 0.442 | 0.136 | 3.99E-15 | PA-4 |
| Ubap2      | 3.27E-19 | 0.767  | 0.681 | 0.291 | 6.52E-15 | PA-4 |
| G2e3       | 3.47E-19 | 0.906  | 0.54  | 0.211 | 6.93E-15 | PA-4 |
| Tmtc2.3    | 4.16E-19 | 1.481  | 0.655 | 0.303 | 8.30E-15 | PA-4 |
| Dek        | 4.37E-19 | 0.689  | 0.513 | 0.185 | 8.72E-15 | PA-4 |
| Mcph1      | 4.39E-19 | 0.751  | 0.584 | 0.221 | 8.76E-15 | PA-4 |
| Sae1       | 6.56E-19 | 0.856  | 0.628 | 0.267 | 1.31E-14 | PA-4 |
| Cdk5rap2   | 6.97E-19 | 0.846  | 0.611 | 0.257 | 1.39E-14 | PA-4 |
| Cep85      | 8.55E-19 | 0.576  | 0.416 | 0.125 | 1.71E-14 | PA-4 |
| Taco1      | 1.38E-18 | 1.130  | 0.796 | 0.478 | 2.76E-14 | PA-4 |
| Ccdc82     | 1.94E-18 | 0.731  | 0.637 | 0.267 | 3.87E-14 | PA-4 |
| Pold3      | 2.64E-18 | 0.636  | 0.451 | 0.146 | 5.27E-14 | PA-4 |
| Xpo1       | 2.93E-18 | 0.835  | 0.681 | 0.307 | 5.86E-14 | PA-4 |
| Lcorl      | 4.05E-18 | 0.966  | 0.726 | 0.384 | 8.09E-14 | PA-4 |
| E2f3       | 5.31E-18 | 0.732  | 0.496 | 0.175 | 1.06E-13 | PA-4 |
| Trim37     | 1.17E-17 | 0.832  | 0.451 | 0.156 | 2.34E-13 | PA-4 |

|              |          |        |       |       |          |      |
|--------------|----------|--------|-------|-------|----------|------|
| Tfdp1        | 1.30E-17 | 0.561  | 0.407 | 0.128 | 2.60E-13 | PA-4 |
| Mdc1         | 2.62E-17 | 0.507  | 0.292 | 0.075 | 5.24E-13 | PA-4 |
| Naaladl2     | 2.74E-17 | -0.914 | 0.965 | 0.967 | 5.47E-13 | PA-4 |
| Fam111a      | 5.46E-17 | 0.532  | 0.319 | 0.09  | 1.09E-12 | PA-4 |
| Ptprs        | 9.02E-17 | 0.645  | 0.593 | 0.242 | 1.80E-12 | PA-4 |
| Itgb3bp      | 1.09E-16 | 0.588  | 0.496 | 0.177 | 2.17E-12 | PA-4 |
| Cep112       | 1.27E-16 | 0.831  | 0.885 | 0.647 | 2.53E-12 | PA-4 |
| Sh3pxd2a.2   | 1.31E-16 | 0.666  | 0.513 | 0.194 | 2.61E-12 | PA-4 |
| Usp37        | 1.34E-16 | 0.752  | 0.637 | 0.289 | 2.68E-12 | PA-4 |
| Rad21        | 1.40E-16 | 0.704  | 0.558 | 0.232 | 2.79E-12 | PA-4 |
| Gsn.3        | 1.88E-16 | -1.645 | 0.77  | 0.913 | 3.75E-12 | PA-4 |
| Xdh          | 2.50E-16 | -1.045 | 0.549 | 0.788 | 4.99E-12 | PA-4 |
| Tgfbr3       | 2.80E-16 | -0.864 | 0.965 | 0.974 | 5.59E-12 | PA-4 |
| Mast2        | 4.20E-16 | 0.741  | 0.85  | 0.527 | 8.38E-12 | PA-4 |
| Nup160       | 8.34E-16 | 0.605  | 0.522 | 0.207 | 1.66E-11 | PA-4 |
| 1700025G04Ri | 1.21E-15 | 0.947  | 0.673 | 0.34  | 2.42E-11 | PA-4 |
| Cacna1c.3    | 1.47E-15 | 1.190  | 0.54  | 0.238 | 2.94E-11 | PA-4 |
| Tipin        | 1.87E-15 | 0.624  | 0.381 | 0.127 | 3.74E-11 | PA-4 |
| Ckap5        | 1.92E-15 | 0.933  | 0.69  | 0.404 | 3.82E-11 | PA-4 |
| Nup107       | 2.27E-15 | 0.565  | 0.354 | 0.111 | 4.53E-11 | PA-4 |
| Lama2.2      | 2.99E-15 | -0.810 | 0.965 | 0.975 | 5.96E-11 | PA-4 |
| 4930503L19Ri | 3.60E-15 | 0.577  | 0.46  | 0.168 | 7.19E-11 | PA-4 |
| Slx4ip       | 5.32E-15 | 0.604  | 0.478 | 0.179 | 1.06E-10 | PA-4 |
| Smc6         | 5.33E-15 | 0.612  | 0.841 | 0.466 | 1.06E-10 | PA-4 |
| Hpfl         | 7.72E-15 | 0.592  | 0.416 | 0.147 | 1.54E-10 | PA-4 |
| Piezo1       | 8.28E-15 | 0.560  | 0.301 | 0.09  | 1.65E-10 | PA-4 |
| Psd3.3       | 1.00E-14 | 0.735  | 0.991 | 0.905 | 2.00E-10 | PA-4 |
| Zbtb16       | 1.07E-14 | -0.779 | 0.876 | 0.953 | 2.14E-10 | PA-4 |
| Col8a1.1     | 1.27E-14 | 0.837  | 0.478 | 0.19  | 2.54E-10 | PA-4 |
| Adam12.2     | 1.53E-14 | 1.194  | 0.504 | 0.216 | 3.05E-10 | PA-4 |
| Hipk2        | 1.80E-14 | 0.733  | 0.558 | 0.244 | 3.60E-10 | PA-4 |
| Ccdc138      | 2.73E-14 | 0.567  | 0.425 | 0.152 | 5.45E-10 | PA-4 |
| Trabd2b      | 3.51E-14 | 0.684  | 0.292 | 0.086 | 7.01E-10 | PA-4 |
| Mitf         | 5.71E-14 | -1.115 | 0.593 | 0.771 | 1.14E-09 | PA-4 |
| Ccdc34       | 5.83E-14 | 0.649  | 0.389 | 0.136 | 1.16E-09 | PA-4 |
| Casp8ap2     | 7.63E-14 | 0.539  | 0.531 | 0.215 | 1.52E-09 | PA-4 |
| Nucks1       | 2.08E-13 | 0.563  | 0.575 | 0.254 | 4.16E-09 | PA-4 |
| Mfhas1       | 3.96E-13 | 0.649  | 0.726 | 0.394 | 7.90E-09 | PA-4 |
| Arhgap24.3   | 4.50E-13 | -1.076 | 0.823 | 0.904 | 8.98E-09 | PA-4 |
| Rif1         | 4.85E-13 | 0.719  | 0.664 | 0.341 | 9.68E-09 | PA-4 |
| Eln.2        | 5.39E-13 | -1.603 | 0.381 | 0.65  | 1.08E-08 | PA-4 |
| Gmds         | 5.55E-13 | 0.662  | 0.947 | 0.707 | 1.11E-08 | PA-4 |
| Sept10       | 5.81E-13 | 0.706  | 0.416 | 0.169 | 1.16E-08 | PA-4 |
| Slbp         | 6.63E-13 | 0.629  | 0.363 | 0.13  | 1.32E-08 | PA-4 |
| Smchd1       | 8.49E-13 | 0.692  | 0.796 | 0.457 | 1.70E-08 | PA-4 |
| Ints7        | 1.06E-12 | 0.673  | 0.407 | 0.162 | 2.12E-08 | PA-4 |
| Galnt18      | 1.65E-12 | 0.580  | 0.46  | 0.186 | 3.29E-08 | PA-4 |
| Rcc1         | 1.80E-12 | 0.506  | 0.425 | 0.163 | 3.60E-08 | PA-4 |
| Cobll1       | 2.09E-12 | 0.640  | 0.301 | 0.098 | 4.18E-08 | PA-4 |
| Cbfb         | 3.33E-12 | 0.692  | 0.69  | 0.388 | 6.64E-08 | PA-4 |
| Sfmbt1       | 5.55E-12 | 0.659  | 0.619 | 0.306 | 1.11E-07 | PA-4 |
| Spidr        | 6.00E-12 | 0.647  | 0.77  | 0.485 | 1.20E-07 | PA-4 |
| Sept11.2     | 6.10E-12 | 0.658  | 0.673 | 0.35  | 1.22E-07 | PA-4 |
| Smc5         | 6.89E-12 | 0.675  | 0.77  | 0.435 | 1.38E-07 | PA-4 |
| Ror2.1       | 7.76E-12 | 0.595  | 0.664 | 0.335 | 1.55E-07 | PA-4 |
| Ccdc88a      | 8.41E-12 | 0.569  | 0.903 | 0.632 | 1.68E-07 | PA-4 |
| Rras2.3      | 1.27E-11 | 0.906  | 0.681 | 0.435 | 2.53E-07 | PA-4 |
| Ctdspl2      | 1.45E-11 | 0.598  | 0.699 | 0.392 | 2.89E-07 | PA-4 |
| Srbd1        | 1.53E-11 | 0.576  | 0.496 | 0.22  | 3.05E-07 | PA-4 |
| Mill2        | 1.55E-11 | -0.955 | 0.407 | 0.654 | 3.09E-07 | PA-4 |
| Abca8a.3     | 1.98E-11 | -1.332 | 0.469 | 0.685 | 3.95E-07 | PA-4 |
| Man1a        | 2.05E-11 | -0.665 | 0.973 | 0.965 | 4.09E-07 | PA-4 |

|              |          |        |       |       |             |      |
|--------------|----------|--------|-------|-------|-------------|------|
| Exoc4        | 2.70E-11 | 0.500  | 0.982 | 0.903 | 5.39E-07    | PA-4 |
| Slfn5        | 2.86E-11 | -1.029 | 0.221 | 0.513 | 5.70E-07    | PA-4 |
| Frmd4a.2     | 2.91E-11 | 0.716  | 0.602 | 0.317 | 5.80E-07    | PA-4 |
| Ext1.2       | 2.91E-11 | 0.554  | 1     | 0.959 | 5.81E-07    | PA-4 |
| Egfr.2       | 3.01E-11 | -0.708 | 0.938 | 0.969 | 6.00E-07    | PA-4 |
| Terf1        | 3.20E-11 | 0.602  | 0.522 | 0.246 | 6.39E-07    | PA-4 |
| Scara5.2     | 3.23E-11 | -0.859 | 0.699 | 0.842 | 6.45E-07    | PA-4 |
| Ccdc141      | 3.63E-11 | 0.611  | 0.416 | 0.178 | 7.25E-07    | PA-4 |
| Lvrn.2       | 3.70E-11 | -1.344 | 0.283 | 0.565 | 7.38E-07    | PA-4 |
| Baz1b        | 4.09E-11 | 0.617  | 0.779 | 0.5   | 8.17E-07    | PA-4 |
| Plpp3.3      | 5.57E-11 | -0.958 | 0.805 | 0.882 | 1.11E-06    | PA-4 |
| Tnxb         | 5.89E-11 | -0.644 | 0.965 | 0.948 | 1.18E-06    | PA-4 |
| Cdk14        | 7.52E-11 | 0.522  | 0.973 | 0.876 | 1.50E-06    | PA-4 |
| Jazf1.2      | 9.33E-11 | 0.630  | 0.504 | 0.235 | 1.86E-06    | PA-4 |
| Slf1         | 9.40E-11 | 0.618  | 0.558 | 0.277 | 1.88E-06    | PA-4 |
| Col5a3.2     | 9.69E-11 | 0.974  | 0.752 | 0.484 | 1.93E-06    | PA-4 |
| mt-Rnr1      | 1.01E-10 | 1.115  | 0.938 | 0.908 | 2.02E-06    | PA-4 |
| Csgalnact1.2 | 1.05E-10 | 0.633  | 0.726 | 0.412 | 2.09E-06    | PA-4 |
| Chsy3.1      | 1.06E-10 | 0.587  | 0.522 | 0.241 | 2.12E-06    | PA-4 |
| Smarcc1      | 1.09E-10 | 0.575  | 0.673 | 0.373 | 2.18E-06    | PA-4 |
| Ablim1.2     | 1.15E-10 | -0.791 | 0.814 | 0.9   | 2.29E-06    | PA-4 |
| Mtf2         | 1.33E-10 | 0.518  | 0.566 | 0.269 | 2.66E-06    | PA-4 |
| Psmc14       | 1.68E-10 | 0.557  | 0.77  | 0.443 | 3.36E-06    | PA-4 |
| Aebp1.1      | 1.87E-10 | -1.313 | 0.31  | 0.548 | 3.74E-06    | PA-4 |
| Galnt15      | 2.37E-10 | -1.039 | 0.204 | 0.481 | 4.73E-06    | PA-4 |
| Supt3        | 2.43E-10 | 0.606  | 0.646 | 0.359 | 4.85E-06    | PA-4 |
| Timp2.2      | 2.76E-10 | -1.225 | 0.513 | 0.681 | 5.50E-06    | PA-4 |
| Rnase4       | 2.85E-10 | -1.146 | 0.177 | 0.44  | 5.68E-06    | PA-4 |
| Runx2        | 3.20E-10 | 0.686  | 0.345 | 0.136 | 6.39E-06    | PA-4 |
| Pid1.2       | 4.24E-10 | -1.066 | 0.566 | 0.763 | 8.46E-06    | PA-4 |
| Taf1d        | 5.55E-10 | 0.522  | 0.496 | 0.24  | 1.11E-05    | PA-4 |
| Mast4.1      | 5.83E-10 | 0.527  | 1     | 0.941 | 1.16E-05    | PA-4 |
| Vcan.2       | 6.07E-10 | 0.586  | 0.929 | 0.688 | 1.21E-05    | PA-4 |
| Abca6.1      | 6.09E-10 | -1.105 | 0.372 | 0.573 | 1.21E-05    | PA-4 |
| AW554918     | 6.71E-10 | 0.590  | 0.85  | 0.581 | 1.34E-05    | PA-4 |
| Srsf10       | 9.27E-10 | 0.544  | 0.566 | 0.296 | 1.85E-05    | PA-4 |
| Vrk2         | 9.83E-10 | 0.528  | 0.743 | 0.415 | 1.96E-05    | PA-4 |
| Slc10a7      | 1.00E-09 | 0.530  | 0.788 | 0.489 | 2.00E-05    | PA-4 |
| Clec2d       | 1.12E-09 | -0.827 | 0.628 | 0.729 | 2.24E-05    | PA-4 |
| Abca1        | 1.21E-09 | -0.780 | 0.637 | 0.756 | 2.41E-05    | PA-4 |
| Cenpc1       | 1.35E-09 | 0.542  | 0.584 | 0.301 | 2.70E-05    | PA-4 |
| Rps6ka5      | 1.40E-09 | 0.536  | 0.513 | 0.254 | 2.79E-05    | PA-4 |
| Ccnd3        | 1.80E-09 | -0.965 | 0.319 | 0.547 | 3.60E-05    | PA-4 |
| Kdm7a.1      | 2.09E-09 | -0.860 | 0.372 | 0.599 | 4.16E-05    | PA-4 |
| Iqgap2       | 2.13E-09 | 0.715  | 0.575 | 0.35  | 4.26E-05    | PA-4 |
| Asxl1        | 2.37E-09 | 0.518  | 0.726 | 0.441 | 4.73E-05    | PA-4 |
| Chn2         | 2.55E-09 | 0.685  | 0.363 | 0.159 | 5.09E-05    | PA-4 |
| Memo1        | 2.71E-09 | 0.652  | 0.717 | 0.447 | 5.41E-05    | PA-4 |
| Dpep1.1      | 3.05E-09 | -1.026 | 0.248 | 0.475 | 6.08E-05    | PA-4 |
| C3.2         | 3.08E-09 | -1.441 | 0.345 | 0.563 | 6.15E-05    | PA-4 |
| Flnb.3       | 3.58E-09 | 0.600  | 0.841 | 0.637 | 7.14E-05    | PA-4 |
| Dapk1        | 4.84E-09 | -0.681 | 0.885 | 0.914 | 9.66E-05    | PA-4 |
| Lrp1         | 7.53E-09 | -0.718 | 0.69  | 0.775 | 0.000150377 | PA-4 |
| Pds5a        | 7.65E-09 | 0.572  | 0.85  | 0.589 | 0.000152727 | PA-4 |
| Htr2a        | 7.70E-09 | 0.524  | 0.274 | 0.102 | 0.000153716 | PA-4 |
| Itga9        | 8.49E-09 | -0.848 | 0.301 | 0.528 | 0.000169363 | PA-4 |
| Tcerg1       | 1.03E-08 | 0.534  | 0.681 | 0.401 | 0.000205871 | PA-4 |
| Clic4        | 1.04E-08 | 0.541  | 0.619 | 0.364 | 0.000208534 | PA-4 |
| Ifi207.2     | 1.06E-08 | -0.851 | 0.442 | 0.611 | 0.000212237 | PA-4 |
| Vcl          | 1.56E-08 | 0.600  | 0.522 | 0.292 | 0.000311709 | PA-4 |
| Prkg1        | 1.63E-08 | -0.941 | 0.735 | 0.801 | 0.000325923 | PA-4 |
| Errfi1.2     | 1.66E-08 | -1.025 | 0.531 | 0.686 | 0.000330784 | PA-4 |

|            |          |        |       |       |             |      |
|------------|----------|--------|-------|-------|-------------|------|
| Clec3b.1   | 1.66E-08 | -0.936 | 0.743 | 0.84  | 0.000331419 | PA-4 |
| Actn4      | 1.75E-08 | 0.507  | 0.522 | 0.277 | 0.000349362 | PA-4 |
| Jag1.3     | 1.95E-08 | 0.699  | 0.628 | 0.393 | 0.000389606 | PA-4 |
| Igfbp4.2   | 1.97E-08 | -1.005 | 0.212 | 0.446 | 0.000393024 | PA-4 |
| Elovl6     | 2.09E-08 | 0.512  | 0.345 | 0.154 | 0.000417757 | PA-4 |
| Syne2      | 2.22E-08 | 0.526  | 0.805 | 0.559 | 0.000442349 | PA-4 |
| Arl15      | 2.33E-08 | -0.631 | 0.912 | 0.938 | 0.000465338 | PA-4 |
| C4b.1      | 3.39E-08 | -1.266 | 0.097 | 0.322 | 0.000675667 | PA-4 |
| Pcolce2.2  | 3.39E-08 | -0.831 | 0.531 | 0.671 | 0.000676935 | PA-4 |
| mt-Cytb.2  | 4.02E-08 | 0.834  | 0.956 | 0.925 | 0.000803123 | PA-4 |
| Dclk1.1    | 4.41E-08 | 0.608  | 0.858 | 0.673 | 0.00087965  | PA-4 |
| Procr.3    | 4.63E-08 | -0.975 | 0.124 | 0.347 | 0.000924391 | PA-4 |
| Pds5b      | 4.68E-08 | 0.534  | 0.796 | 0.588 | 0.000934979 | PA-4 |
| Pcsk5      | 5.26E-08 | -1.025 | 0.54  | 0.68  | 0.001050543 | PA-4 |
| Nr3c2      | 5.47E-08 | -1.063 | 0.195 | 0.419 | 0.001091596 | PA-4 |
| Adrg2.3    | 8.03E-08 | 0.630  | 0.681 | 0.453 | 0.001602234 | PA-4 |
| Il1rl2.2   | 1.13E-07 | -0.863 | 0.566 | 0.684 | 0.002258077 | PA-4 |
| C1s1       | 1.33E-07 | -0.758 | 0.566 | 0.671 | 0.00265164  | PA-4 |
| Cped1.2    | 1.40E-07 | -0.587 | 0.929 | 0.922 | 0.002788039 | PA-4 |
| Maml3.3    | 1.59E-07 | -0.982 | 0.469 | 0.602 | 0.003170946 | PA-4 |
| Serpinf1.1 | 1.80E-07 | -0.900 | 0.416 | 0.584 | 0.003595837 | PA-4 |
| Sclt1      | 1.81E-07 | 0.579  | 0.628 | 0.366 | 0.003605725 | PA-4 |
| Ecm1.1     | 1.84E-07 | -0.830 | 0.372 | 0.587 | 0.003678111 | PA-4 |
| Opcml.2    | 2.20E-07 | -0.677 | 0.903 | 0.899 | 0.004398971 | PA-4 |
| mt-Rnr2.1  | 2.22E-07 | 0.845  | 0.938 | 0.91  | 0.004431342 | PA-4 |
| Gulp1      | 2.37E-07 | -0.654 | 0.832 | 0.863 | 0.00472517  | PA-4 |
| Cblb       | 2.44E-07 | -0.558 | 0.903 | 0.896 | 0.004874534 | PA-4 |
| Svep1.3    | 2.47E-07 | -1.063 | 0.46  | 0.612 | 0.004925402 | PA-4 |
| Pdgfc.3    | 2.52E-07 | 0.779  | 0.673 | 0.471 | 0.00502737  | PA-4 |
| mt-Atp6.1  | 2.74E-07 | 0.861  | 0.956 | 0.955 | 0.005475917 | PA-4 |
| Thsd7a.1   | 2.87E-07 | -0.851 | 0.761 | 0.817 | 0.005718792 | PA-4 |
| mt-Co2.2   | 3.76E-07 | 0.834  | 0.938 | 0.948 | 0.007499351 | PA-4 |
| Ace        | 4.02E-07 | -0.790 | 0.133 | 0.353 | 0.008015742 | PA-4 |
| Kpna3      | 4.96E-07 | 0.528  | 0.575 | 0.339 | 0.009904314 | PA-4 |
| Lamc1      | 5.99E-07 | -0.544 | 0.876 | 0.92  | 0.011964596 | PA-4 |
| Ltbp1.2    | 6.98E-07 | -0.584 | 0.814 | 0.857 | 0.01393083  | PA-4 |
| mt-Atp8    | 8.15E-07 | 0.513  | 0.619 | 0.415 | 0.016264665 | PA-4 |
| Pi16.3     | 1.05E-06 | -1.249 | 0.708 | 0.725 | 0.020998744 | PA-4 |
| Rsrp1      | 1.17E-06 | -0.582 | 0.708 | 0.744 | 0.023267159 | PA-4 |
| Nova1.2    | 1.20E-06 | -0.657 | 0.956 | 0.926 | 0.024041618 | PA-4 |
| Ogn.2      | 1.22E-06 | -0.922 | 0.558 | 0.62  | 0.024281025 | PA-4 |
| Nckap5.3   | 1.23E-06 | -0.999 | 0.451 | 0.578 | 0.024593578 | PA-4 |
| Thrb.2     | 1.27E-06 | -0.894 | 0.434 | 0.566 | 0.025355604 | PA-4 |
| Dlgap4     | 1.49E-06 | -0.620 | 0.398 | 0.566 | 0.029783609 | PA-4 |
| mt-Co3.2   | 1.63E-06 | 0.705  | 0.973 | 0.956 | 0.032479201 | PA-4 |
| Stxbp6.3   | 2.08E-06 | 0.536  | 0.867 | 0.695 | 0.041581626 | PA-4 |
| Mmp2       | 2.09E-06 | -0.758 | 0.416 | 0.56  | 0.041752635 | PA-4 |
| Klf9       | 2.24E-06 | -0.720 | 0.407 | 0.553 | 0.044643874 | PA-4 |
| Acss3      | 2.36E-06 | -0.656 | 0.46  | 0.623 | 0.047139451 | PA-4 |
| Kdm5b      | 2.40E-06 | -0.685 | 0.221 | 0.401 | 0.047820268 | PA-4 |
| Fndc1.3    | 2.41E-06 | -0.556 | 0.885 | 0.918 | 0.04807402  | PA-4 |
| Adarb1     | 2.49E-06 | -0.674 | 0.239 | 0.449 | 0.049743018 | PA-4 |
| C7.3       | 3.74E-06 | -2.262 | 0.31  | 0.462 | 0.074603709 | PA-4 |
| Pik3r1.2   | 3.98E-06 | -0.692 | 0.637 | 0.7   | 0.079473767 | PA-4 |
| Tmem178b   | 4.08E-06 | -0.922 | 0.195 | 0.38  | 0.081515644 | PA-4 |
| Sh3d19     | 4.16E-06 | -0.519 | 0.832 | 0.862 | 0.082958247 | PA-4 |
| Crebrf     | 4.17E-06 | -0.668 | 0.372 | 0.534 | 0.083296083 | PA-4 |
| Rb1cc1     | 4.73E-06 | -0.546 | 0.584 | 0.685 | 0.094436685 | PA-4 |
| Igfbp6.2   | 5.07E-06 | -1.030 | 0.434 | 0.584 | 0.101242718 | PA-4 |
| Palm       | 5.44E-06 | -0.598 | 0.425 | 0.563 | 0.108589928 | PA-4 |
| Nox4       | 5.57E-06 | -0.874 | 0.876 | 0.857 | 0.111249231 | PA-4 |
| Hmcn2.3    | 5.68E-06 | -1.176 | 0.124 | 0.317 | 0.113346474 | PA-4 |

|            |           |        |       |       |             |      |
|------------|-----------|--------|-------|-------|-------------|------|
| Itgbl1.3   | 5.85E-06  | -1.117 | 0.619 | 0.703 | 0.116830676 | PA-4 |
| C1ra       | 5.90E-06  | -0.762 | 0.204 | 0.376 | 0.117853772 | PA-4 |
| mt-Nd1.2   | 6.78E-06  | 0.740  | 0.903 | 0.916 | 0.135396874 | PA-4 |
| Samhd1.3   | 7.63E-06  | -0.698 | 0.628 | 0.709 | 0.152386558 | PA-4 |
| Pced1b     | 8.58E-06  | -0.722 | 0.177 | 0.357 | 0.171321575 | PA-4 |
| mt-Co1.1   | 9.26E-06  | 0.623  | 0.965 | 0.962 | 0.184831244 | PA-4 |
| Slc8a1.1   | 9.34E-06  | 0.604  | 0.814 | 0.669 | 0.186328151 | PA-4 |
| mt-Nd6.1   | 9.57E-06  | 0.558  | 0.619 | 0.432 | 0.190941525 | PA-4 |
| Ugdh.3     | 1.05E-05  | 0.577  | 0.77  | 0.564 | 0.209838472 | PA-4 |
| Itga11.2   | 1.82E-05  | -0.744 | 0.345 | 0.5   | 0.36298212  | PA-4 |
| mt-Nd4.1   | 1.86E-05  | 0.606  | 0.92  | 0.91  | 0.370741955 | PA-4 |
| Sfrp2.2    | 1.90E-05  | -0.880 | 0.088 | 0.267 | 0.379477318 | PA-4 |
| Itm2b      | 2.18E-05  | -1.049 | 0.195 | 0.346 | 0.435060624 | PA-4 |
| Scn7a      | 2.57E-05  | -0.591 | 0.602 | 0.695 | 0.513254155 | PA-4 |
| Apod.1     | 2.66E-05  | -0.802 | 0.177 | 0.343 | 0.53042724  | PA-4 |
| Pdgfra.1   | 3.43E-05  | -0.628 | 0.619 | 0.683 | 0.685410607 | PA-4 |
| Tek.3      | 3.82E-05  | -0.756 | 0.637 | 0.661 | 0.76162131  | PA-4 |
| Ly6a.2     | 3.87E-05  | -0.947 | 0.54  | 0.591 | 0.773164743 | PA-4 |
| Txnip      | 4.32E-05  | -0.748 | 0.23  | 0.38  | 0.861898347 | PA-4 |
| Dpp4.3     | 4.93E-05  | -0.747 | 0.858 | 0.785 | 0.983856315 | PA-4 |
| Abi3bp.2   | 5.03E-05  | -0.657 | 0.805 | 0.835 | 1           | PA-4 |
| Fam129a    | 5.25E-05  | -0.570 | 0.628 | 0.69  | 1           | PA-4 |
| Ahnak      | 6.30E-05  | -0.513 | 0.823 | 0.841 | 1           | PA-4 |
| Foxn3      | 7.80E-05  | -0.511 | 0.69  | 0.78  | 1           | PA-4 |
| Islr       | 9.30E-05  | -0.616 | 0.177 | 0.336 | 1           | PA-4 |
| Aff1       | 9.34E-05  | -0.506 | 0.628 | 0.698 | 1           | PA-4 |
| Ube2h      | 0.0001128 | -0.510 | 0.593 | 0.651 | 1           | PA-4 |
| Lmbrd1     | 0.000114  | -0.592 | 0.257 | 0.397 | 1           | PA-4 |
| Mxd4       | 0.0001348 | -0.534 | 0.221 | 0.371 | 1           | PA-4 |
| Adamts6    | 0.000136  | 0.866  | 0.389 | 0.252 | 1           | PA-4 |
| Zfp36l1    | 0.0001602 | -0.584 | 0.451 | 0.529 | 1           | PA-4 |
| Rarres2    | 0.0001797 | -0.881 | 0.195 | 0.321 | 1           | PA-4 |
| Ahnak2     | 0.0001946 | -0.639 | 0.257 | 0.381 | 1           | PA-4 |
| Papss2     | 0.0001958 | -0.728 | 0.372 | 0.492 | 1           | PA-4 |
| Ppp2r2b.2  | 0.0001976 | -0.777 | 0.274 | 0.431 | 1           | PA-4 |
| Fbxl20     | 0.0001986 | -0.546 | 0.381 | 0.506 | 1           | PA-4 |
| Ezh1       | 0.0002079 | -0.507 | 0.212 | 0.362 | 1           | PA-4 |
| Maf.1      | 0.0002114 | -0.510 | 0.487 | 0.592 | 1           | PA-4 |
| Dock9.2    | 0.0002354 | -0.716 | 0.372 | 0.477 | 1           | PA-4 |
| Klf4.2     | 0.0002424 | -0.653 | 0.398 | 0.509 | 1           | PA-4 |
| Susd6      | 0.0002462 | -0.585 | 0.531 | 0.588 | 1           | PA-4 |
| Nrip1.2    | 0.000288  | -0.537 | 0.743 | 0.745 | 1           | PA-4 |
| Fgf7.2     | 0.000289  | -0.727 | 0.177 | 0.313 | 1           | PA-4 |
| Fgd4       | 0.0003303 | -0.590 | 0.381 | 0.487 | 1           | PA-4 |
| Rps21.2    | 0.0003734 | -1.005 | 0.221 | 0.345 | 1           | PA-4 |
| Ntrk2      | 0.0003979 | -0.798 | 0.195 | 0.315 | 1           | PA-4 |
| Olfr1033.1 | 0.0004255 | -0.597 | 0.195 | 0.342 | 1           | PA-4 |
| Lbp        | 0.0004366 | -0.553 | 0.195 | 0.333 | 1           | PA-4 |
| Fbln1.2    | 0.0005371 | -0.909 | 0.168 | 0.288 | 1           | PA-4 |
| Kmt5b      | 0.0005461 | -0.510 | 0.407 | 0.504 | 1           | PA-4 |
| Rcan2      | 0.0006165 | -0.586 | 0.584 | 0.651 | 1           | PA-4 |
| Anpep      | 0.0006787 | -0.504 | 0.186 | 0.316 | 1           | PA-4 |
| Prkn       | 0.0007074 | -0.584 | 0.664 | 0.663 | 1           | PA-4 |
| Ltbp4.2    | 0.0007515 | -0.799 | 0.168 | 0.285 | 1           | PA-4 |
| Gm48582    | 0.0007532 | -0.503 | 0.248 | 0.375 | 1           | PA-4 |
| Nr1h4.3    | 0.0009279 | -0.688 | 0.292 | 0.404 | 1           | PA-4 |
| Prex2.2    | 0.0009379 | -0.647 | 0.363 | 0.459 | 1           | PA-4 |
| Zdhhc17    | 0.0009658 | -0.539 | 0.248 | 0.357 | 1           | PA-4 |
| Mta3       | 0.0010027 | -0.510 | 0.381 | 0.476 | 1           | PA-4 |
| Gas1.3     | 0.0011128 | -0.776 | 0.186 | 0.296 | 1           | PA-4 |
| Mecp2      | 0.0012691 | -0.510 | 0.381 | 0.47  | 1           | PA-4 |
| Sfxn1      | 0.0014151 | -0.550 | 0.204 | 0.308 | 1           | PA-4 |

|            |           |        |       |       |   |      |
|------------|-----------|--------|-------|-------|---|------|
| Pla1a.3    | 0.0014229 | -0.595 | 0.611 | 0.603 | 1 | PA-4 |
| Lum.3      | 0.0014426 | -0.732 | 0.15  | 0.258 | 1 | PA-4 |
| Acadsb     | 0.0015125 | -0.505 | 0.389 | 0.475 | 1 | PA-4 |
| Dpt.3      | 0.0015325 | -0.586 | 0.664 | 0.692 | 1 | PA-4 |
| Adamts16.3 | 0.0016425 | -0.974 | 0.204 | 0.313 | 1 | PA-4 |
| Serpinb6a  | 0.0017101 | -0.561 | 0.389 | 0.462 | 1 | PA-4 |
| Tom1       | 0.0017837 | -0.517 | 0.257 | 0.362 | 1 | PA-4 |
| Pdcd4      | 0.0019937 | -0.539 | 0.31  | 0.402 | 1 | PA-4 |
| Plcx3.2    | 0.0019976 | -1.278 | 0.221 | 0.327 | 1 | PA-4 |
| Angpt1.3   | 0.0021104 | -0.660 | 0.301 | 0.421 | 1 | PA-4 |
| Gstm1      | 0.0021265 | -0.559 | 0.15  | 0.256 | 1 | PA-4 |
| Epha3.3    | 0.0021642 | -0.798 | 0.23  | 0.355 | 1 | PA-4 |
| Dnm3       | 0.0022166 | -0.603 | 0.389 | 0.47  | 1 | PA-4 |
| Fat4       | 0.0022207 | -0.565 | 0.159 | 0.271 | 1 | PA-4 |
| Abca8b     | 0.0028581 | -0.708 | 0.381 | 0.474 | 1 | PA-4 |
| Lrmda      | 0.0028741 | -0.558 | 0.743 | 0.737 | 1 | PA-4 |
| Deptor.3   | 0.0032665 | -0.546 | 0.195 | 0.314 | 1 | PA-4 |
| Gfpt2.3    | 0.0034245 | -0.520 | 0.779 | 0.773 | 1 | PA-4 |
| Runx1t1.1  | 0.0035222 | -0.523 | 0.478 | 0.553 | 1 | PA-4 |
| Smpd3.3    | 0.0035975 | -0.587 | 0.451 | 0.557 | 1 | PA-4 |
| Sntg1.3    | 0.0037272 | -0.521 | 0.345 | 0.46  | 1 | PA-4 |
| Klhl13     | 0.0037474 | -0.578 | 0.407 | 0.472 | 1 | PA-4 |
| Upp2       | 0.0038151 | -0.603 | 0.283 | 0.372 | 1 | PA-4 |
| Sfrp4.1    | 0.003902  | -0.798 | 0.283 | 0.366 | 1 | PA-4 |
| Ly6c1.2    | 0.0040522 | -0.613 | 0.345 | 0.426 | 1 | PA-4 |
| Zfp652     | 0.0040823 | -0.520 | 0.31  | 0.394 | 1 | PA-4 |
| Dab2.1     | 0.0044494 | -0.562 | 0.204 | 0.297 | 1 | PA-4 |
| Adamts1.3  | 0.004631  | 0.556  | 0.903 | 0.899 | 1 | PA-4 |
| Dusp1      | 0.0052317 | -0.522 | 0.186 | 0.285 | 1 | PA-4 |
| Cdh9.2     | 0.0075231 | -0.539 | 0.265 | 0.37  | 1 | PA-4 |
| Fbln5      | 0.0076819 | -0.507 | 0.257 | 0.34  | 1 | PA-4 |
| Fmo1.2     | 0.0081376 | -0.616 | 0.177 | 0.27  | 1 | PA-4 |
| Pde1a      | 0.0096452 | -0.590 | 0.319 | 0.401 | 1 | PA-4 |
| F13a1      | 0         | 3.433  | 0.724 | 0.036 | 0 | PA-5 |
| Mctp1      | 0         | 3.112  | 0.747 | 0.034 | 0 | PA-5 |
| Mrc1       | 0         | 2.762  | 0.652 | 0.015 | 0 | PA-5 |
| Mtss1      | 0         | 2.421  | 0.724 | 0.028 | 0 | PA-5 |
| Dock2      | 0         | 2.407  | 0.747 | 0.016 | 0 | PA-5 |
| Arhgap15   | 0         | 2.383  | 0.724 | 0.059 | 0 | PA-5 |
| Fli1       | 0         | 2.238  | 0.744 | 0.05  | 0 | PA-5 |
| Runx1      | 0         | 2.149  | 0.669 | 0.036 | 0 | PA-5 |
| March1     | 0         | 1.921  | 0.56  | 0.015 | 0 | PA-5 |
| Hdac9      | 0         | 1.907  | 0.539 | 0.017 | 0 | PA-5 |
| Ctsc       | 0         | 1.765  | 0.505 | 0.014 | 0 | PA-5 |
| Inpp5d     | 0         | 1.703  | 0.567 | 0.011 | 0 | PA-5 |
| Ptprc      | 0         | 1.596  | 0.481 | 0.007 | 0 | PA-5 |
| Fyb        | 0         | 1.573  | 0.522 | 0.01  | 0 | PA-5 |
| Myo1f      | 0         | 1.499  | 0.502 | 0.009 | 0 | PA-5 |
| Tbxas1     | 0         | 1.488  | 0.481 | 0.008 | 0 | PA-5 |
| Epsti1     | 0         | 1.482  | 0.437 | 0.013 | 0 | PA-5 |
| Adgre1     | 0         | 1.459  | 0.447 | 0.003 | 0 | PA-5 |
| Stab1      | 0         | 1.421  | 0.451 | 0.009 | 0 | PA-5 |
| Nrros      | 0         | 1.395  | 0.481 | 0.008 | 0 | PA-5 |
| Dock8      | 0         | 1.389  | 0.454 | 0.011 | 0 | PA-5 |
| Rbm47      | 0         | 1.378  | 0.471 | 0.012 | 0 | PA-5 |
| Shtn1      | 0         | 1.219  | 0.423 | 0.004 | 0 | PA-5 |
| Pstpip2    | 0         | 1.187  | 0.403 | 0.011 | 0 | PA-5 |
| Kcnk13     | 0         | 1.181  | 0.389 | 0.01  | 0 | PA-5 |
| Blnk       | 0         | 1.148  | 0.355 | 0.005 | 0 | PA-5 |
| Clec10a    | 0         | 1.146  | 0.365 | 0.003 | 0 | PA-5 |
| Gm21188    | 0         | 1.139  | 0.362 | 0.002 | 0 | PA-5 |
| Ikzf1      | 0         | 1.138  | 0.355 | 0.007 | 0 | PA-5 |

|            |           |       |       |       |           |      |
|------------|-----------|-------|-------|-------|-----------|------|
| Tm6sf1     | 0         | 1.119 | 0.396 | 0.002 | 0         | PA-5 |
| Lcp1       | 0         | 1.031 | 0.307 | 0.003 | 0         | PA-5 |
| Itga4      | 0         | 1.030 | 0.341 | 0.006 | 0         | PA-5 |
| Gng2       | 0         | 1.018 | 0.362 | 0.008 | 0         | PA-5 |
| Ly86       | 0         | 1.018 | 0.328 | 0.004 | 0         | PA-5 |
| Tnfrsf11a  | 0         | 1.008 | 0.345 | 0.005 | 0         | PA-5 |
| Cd84       | 0         | 0.964 | 0.317 | 0.003 | 0         | PA-5 |
| Nckap1l    | 0         | 0.927 | 0.294 | 0.003 | 0         | PA-5 |
| Cyth4      | 0         | 0.897 | 0.304 | 0.003 | 0         | PA-5 |
| Prkch      | 9.15E-306 | 1.479 | 0.403 | 0.014 | 1.83E-301 | PA-5 |
| Bank1      | 8.14E-301 | 1.207 | 0.338 | 0.008 | 1.62E-296 | PA-5 |
| Pik3ap1    | 3.95E-299 | 0.906 | 0.307 | 0.005 | 7.88E-295 | PA-5 |
| Apoe       | 1.54E-296 | 2.146 | 0.481 | 0.025 | 3.08E-292 | PA-5 |
| Ednrb      | 4.99E-294 | 1.364 | 0.355 | 0.01  | 9.95E-290 | PA-5 |
| St8sia4    | 2.21E-288 | 0.965 | 0.266 | 0.003 | 4.41E-284 | PA-5 |
| Arhgap45   | 1.60E-287 | 1.053 | 0.358 | 0.011 | 3.20E-283 | PA-5 |
| Tpd52      | 8.67E-272 | 0.897 | 0.294 | 0.006 | 1.73E-267 | PA-5 |
| Cd163      | 1.07E-268 | 1.761 | 0.413 | 0.019 | 2.13E-264 | PA-5 |
| Ms4a6c     | 1.41E-267 | 0.844 | 0.28  | 0.005 | 2.81E-263 | PA-5 |
| Arhgap26.1 | 1.98E-267 | 1.365 | 0.498 | 0.032 | 3.96E-263 | PA-5 |
| Mertk      | 4.92E-259 | 1.634 | 0.56  | 0.046 | 9.83E-255 | PA-5 |
| Stard8     | 7.75E-257 | 1.337 | 0.485 | 0.032 | 1.55E-252 | PA-5 |
| Rnf150     | 7.24E-255 | 2.072 | 0.614 | 0.059 | 1.44E-250 | PA-5 |
| Tec        | 8.58E-255 | 0.733 | 0.28  | 0.006 | 1.71E-250 | PA-5 |
| Prkcb      | 3.58E-247 | 1.082 | 0.406 | 0.021 | 7.14E-243 | PA-5 |
| Lyn        | 3.99E-247 | 1.896 | 0.666 | 0.076 | 7.96E-243 | PA-5 |
| Cd36       | 9.07E-244 | 2.608 | 0.457 | 0.03  | 1.81E-239 | PA-5 |
| Rcsd1      | 1.27E-243 | 0.869 | 0.297 | 0.008 | 2.54E-239 | PA-5 |
| B4galt6    | 8.83E-242 | 0.698 | 0.263 | 0.005 | 1.76E-237 | PA-5 |
| Otulinl    | 1.55E-240 | 0.728 | 0.28  | 0.007 | 3.09E-236 | PA-5 |
| Aoah       | 1.30E-239 | 1.109 | 0.321 | 0.011 | 2.59E-235 | PA-5 |
| Specc1     | 1.76E-236 | 1.351 | 0.42  | 0.025 | 3.51E-232 | PA-5 |
| Plcg2      | 1.18E-232 | 0.803 | 0.256 | 0.005 | 2.35E-228 | PA-5 |
| Alcam      | 3.76E-232 | 1.769 | 0.362 | 0.017 | 7.50E-228 | PA-5 |
| Slc43a2    | 1.23E-226 | 1.095 | 0.403 | 0.024 | 2.46E-222 | PA-5 |
| P3h2       | 2.34E-209 | 1.259 | 0.321 | 0.015 | 4.67E-205 | PA-5 |
| Nrp2       | 4.25E-204 | 1.253 | 0.41  | 0.029 | 8.49E-200 | PA-5 |
| Adap2      | 6.23E-201 | 1.428 | 0.478 | 0.042 | 1.24E-196 | PA-5 |
| Pik3r5     | 2.55E-195 | 0.674 | 0.253 | 0.008 | 5.09E-191 | PA-5 |
| Apobec1    | 2.62E-193 | 1.432 | 0.491 | 0.049 | 5.23E-189 | PA-5 |
| Ehd4       | 4.67E-192 | 1.207 | 0.416 | 0.034 | 9.32E-188 | PA-5 |
| Fgd6       | 2.74E-183 | 0.662 | 0.253 | 0.009 | 5.47E-179 | PA-5 |
| Cacna1d    | 1.38E-179 | 0.961 | 0.307 | 0.017 | 2.76E-175 | PA-5 |
| Plekhg5    | 4.11E-179 | 1.507 | 0.468 | 0.049 | 8.21E-175 | PA-5 |
| Plxna4     | 1.66E-178 | 1.507 | 0.372 | 0.028 | 3.32E-174 | PA-5 |
| Pltp       | 2.98E-170 | 1.060 | 0.273 | 0.013 | 5.95E-166 | PA-5 |
| Nedd9      | 9.48E-151 | 1.343 | 0.584 | 0.096 | 1.89E-146 | PA-5 |
| Epb41      | 3.96E-147 | 1.010 | 0.399 | 0.041 | 7.90E-143 | PA-5 |
| Unc93b1    | 1.12E-146 | 1.016 | 0.382 | 0.039 | 2.24E-142 | PA-5 |
| Ubash3b    | 6.40E-141 | 0.978 | 0.345 | 0.031 | 1.28E-136 | PA-5 |
| Tns3       | 7.13E-140 | 0.928 | 0.386 | 0.04  | 1.42E-135 | PA-5 |
| Fry        | 3.90E-136 | 1.499 | 0.355 | 0.035 | 7.79E-132 | PA-5 |
| Vav3.3     | 1.08E-134 | 1.742 | 0.819 | 0.229 | 2.16E-130 | PA-5 |
| Pde3b.1    | 1.52E-129 | 1.167 | 0.471 | 0.068 | 3.04E-125 | PA-5 |
| Lifr.2     | 4.09E-114 | 1.322 | 0.553 | 0.11  | 8.17E-110 | PA-5 |
| Trps1.2    | 1.76E-111 | 1.655 | 0.71  | 0.193 | 3.52E-107 | PA-5 |
| Prkcd      | 6.24E-110 | 0.772 | 0.331 | 0.038 | 1.25E-105 | PA-5 |
| Pepd       | 2.53E-103 | 1.097 | 0.44  | 0.077 | 5.04E-99  | PA-5 |
| Cdk6       | 3.08E-100 | 0.821 | 0.294 | 0.032 | 6.14E-96  | PA-5 |
| Plcl2.2    | 2.49E-99  | 1.468 | 0.659 | 0.182 | 4.97E-95  | PA-5 |
| Mamdc2     | 1.97E-96  | 1.130 | 0.307 | 0.038 | 3.94E-92  | PA-5 |
| Serinc3    | 4.22E-94  | 1.326 | 0.553 | 0.14  | 8.42E-90  | PA-5 |



|           |          |        |       |       |          |      |
|-----------|----------|--------|-------|-------|----------|------|
| Myo5a.3   | 1.72E-93 | 1.556  | 0.7   | 0.229 | 3.44E-89 | PA-5 |
| Stk17b    | 6.37E-93 | 0.746  | 0.311 | 0.04  | 1.27E-88 | PA-5 |
| Nos1ap    | 1.19E-90 | 1.148  | 0.311 | 0.041 | 2.38E-86 | PA-5 |
| Dclre1c   | 4.10E-90 | 1.185  | 0.468 | 0.098 | 8.19E-86 | PA-5 |
| Snx8      | 5.88E-90 | 1.043  | 0.44  | 0.086 | 1.17E-85 | PA-5 |
| Tnfaip8   | 7.75E-90 | 1.096  | 0.444 | 0.086 | 1.55E-85 | PA-5 |
| Ripor2    | 6.59E-89 | 0.791  | 0.283 | 0.034 | 1.31E-84 | PA-5 |
| Sept9     | 8.75E-88 | 0.787  | 0.338 | 0.05  | 1.75E-83 | PA-5 |
| Plin2     | 1.22E-84 | 0.776  | 0.341 | 0.053 | 2.43E-80 | PA-5 |
| Pecam1    | 4.79E-84 | 2.002  | 0.273 | 0.035 | 9.56E-80 | PA-5 |
| Pip4k2a   | 7.72E-83 | 1.441  | 0.724 | 0.267 | 1.54E-78 | PA-5 |
| Rreb1.1   | 8.69E-82 | 1.626  | 0.826 | 0.404 | 1.74E-77 | PA-5 |
| Pkp4.1    | 1.58E-81 | 1.303  | 0.369 | 0.065 | 3.16E-77 | PA-5 |
| Dab2.2    | 4.43E-79 | 1.635  | 0.71  | 0.276 | 8.84E-75 | PA-5 |
| Gramd1b   | 1.76E-78 | 0.607  | 0.253 | 0.031 | 3.52E-74 | PA-5 |
| Fam49b    | 7.86E-78 | 1.202  | 0.676 | 0.226 | 1.57E-73 | PA-5 |
| Wwp1      | 9.89E-77 | 1.606  | 0.809 | 0.398 | 1.97E-72 | PA-5 |
| Pparg.2   | 2.16E-76 | 1.654  | 0.536 | 0.139 | 4.31E-72 | PA-5 |
| Pitpnc1.1 | 3.11E-76 | 1.409  | 0.823 | 0.384 | 6.21E-72 | PA-5 |
| Slc9a9.1  | 3.63E-75 | 1.624  | 0.877 | 0.518 | 7.25E-71 | PA-5 |
| Entpd1    | 2.70E-74 | 1.113  | 0.471 | 0.115 | 5.39E-70 | PA-5 |
| Arhgef6   | 1.61E-73 | 0.859  | 0.427 | 0.095 | 3.21E-69 | PA-5 |
| Elk3      | 5.61E-71 | 1.172  | 0.474 | 0.121 | 1.12E-66 | PA-5 |
| Mob3b     | 1.34E-70 | 0.890  | 0.413 | 0.09  | 2.68E-66 | PA-5 |
| Snx5      | 1.58E-70 | 1.017  | 0.522 | 0.149 | 3.16E-66 | PA-5 |
| Itprid2   | 1.48E-67 | 0.764  | 0.358 | 0.072 | 2.96E-63 | PA-5 |
| P2rx7     | 1.55E-65 | 0.628  | 0.331 | 0.062 | 3.10E-61 | PA-5 |
| Fbn1.3    | 3.05E-65 | -1.512 | 0.867 | 0.981 | 6.09E-61 | PA-5 |
| Abhd12    | 4.42E-65 | 0.979  | 0.433 | 0.11  | 8.83E-61 | PA-5 |
| Rbpj      | 4.63E-65 | 2.333  | 0.874 | 0.658 | 9.24E-61 | PA-5 |
| Ap1b1     | 2.54E-62 | 0.760  | 0.341 | 0.07  | 5.08E-58 | PA-5 |
| Sh3kbp1.1 | 5.01E-62 | 1.085  | 0.706 | 0.294 | 1.00E-57 | PA-5 |
| Dgkd      | 1.45E-61 | 0.787  | 0.42  | 0.104 | 2.89E-57 | PA-5 |
| Sema3c.3  | 8.59E-60 | -1.676 | 0.631 | 0.879 | 1.71E-55 | PA-5 |
| Frmd4b.2  | 3.23E-59 | 1.407  | 0.877 | 0.58  | 6.45E-55 | PA-5 |
| Epb41l1   | 3.65E-59 | 0.825  | 0.416 | 0.108 | 7.28E-55 | PA-5 |
| Gab3      | 3.91E-59 | 0.928  | 0.505 | 0.147 | 7.80E-55 | PA-5 |
| Nid1.2    | 9.47E-59 | -1.228 | 0.727 | 0.912 | 1.89E-54 | PA-5 |
| Pde4d.2   | 4.45E-58 | 0.890  | 0.584 | 0.189 | 8.88E-54 | PA-5 |
| Mfap5.3   | 1.38E-57 | -1.620 | 0.556 | 0.834 | 2.75E-53 | PA-5 |
| Atp10d.2  | 4.55E-56 | 0.949  | 0.546 | 0.179 | 9.08E-52 | PA-5 |
| Zdhhc14.2 | 3.85E-54 | 1.189  | 0.666 | 0.296 | 7.68E-50 | PA-5 |
| Zswim6    | 5.97E-54 | 1.196  | 0.843 | 0.504 | 1.19E-49 | PA-5 |
| Slc16a7   | 6.80E-54 | 0.804  | 0.427 | 0.116 | 1.36E-49 | PA-5 |
| Adgrd1.3  | 1.09E-53 | -1.156 | 0.703 | 0.914 | 2.17E-49 | PA-5 |
| Arhgap39  | 2.43E-53 | 0.824  | 0.433 | 0.122 | 4.86E-49 | PA-5 |
| Dhrs3.3   | 1.36E-52 | 0.838  | 0.543 | 0.182 | 2.71E-48 | PA-5 |
| Dgkz      | 1.67E-52 | 0.647  | 0.307 | 0.067 | 3.33E-48 | PA-5 |
| Fstl1.1   | 4.11E-52 | -0.997 | 0.867 | 0.967 | 8.20E-48 | PA-5 |
| Atp8a1    | 6.09E-52 | 0.891  | 0.416 | 0.117 | 1.22E-47 | PA-5 |
| Epas1     | 1.22E-51 | 0.754  | 0.297 | 0.062 | 2.44E-47 | PA-5 |
| N4bp2l1   | 1.27E-51 | 0.577  | 0.283 | 0.057 | 2.53E-47 | PA-5 |
| Sipa1l1   | 1.81E-51 | 0.844  | 0.464 | 0.14  | 3.60E-47 | PA-5 |
| Gas6.2    | 3.33E-51 | 0.736  | 0.478 | 0.141 | 6.64E-47 | PA-5 |
| Sdk1.4    | 3.99E-51 | -1.156 | 0.727 | 0.924 | 7.96E-47 | PA-5 |
| Ddr2.3    | 4.82E-51 | -1.007 | 0.778 | 0.953 | 9.63E-47 | PA-5 |
| Fndc1.4   | 5.37E-51 | -1.224 | 0.713 | 0.927 | 1.07E-46 | PA-5 |
| Exoc6     | 1.12E-50 | 0.967  | 0.321 | 0.074 | 2.23E-46 | PA-5 |
| Rab31.2   | 1.19E-50 | 0.919  | 0.549 | 0.198 | 2.38E-46 | PA-5 |
| Slco2b1.3 | 1.64E-50 | 0.946  | 0.587 | 0.214 | 3.27E-46 | PA-5 |
| Cfh.2     | 2.17E-50 | 1.314  | 0.573 | 0.229 | 4.32E-46 | PA-5 |
| Myo1d.2   | 1.35E-49 | 1.108  | 0.372 | 0.098 | 2.69E-45 | PA-5 |

|              |          |        |       |       |          |      |
|--------------|----------|--------|-------|-------|----------|------|
| Ebf1.2       | 2.06E-49 | -0.908 | 0.99  | 0.998 | 4.11E-45 | PA-5 |
| Elmo1.1      | 3.12E-49 | 1.069  | 0.911 | 0.673 | 6.23E-45 | PA-5 |
| Arid5b.1     | 4.25E-49 | 1.041  | 0.631 | 0.26  | 8.47E-45 | PA-5 |
| Arhgap18.1   | 9.09E-49 | 1.098  | 0.754 | 0.375 | 1.82E-44 | PA-5 |
| Tnxb.1       | 1.30E-48 | -0.964 | 0.829 | 0.954 | 2.59E-44 | PA-5 |
| Dpp4.4       | 1.92E-48 | -1.543 | 0.502 | 0.8   | 3.83E-44 | PA-5 |
| Grb2         | 4.32E-48 | 0.912  | 0.618 | 0.26  | 8.63E-44 | PA-5 |
| Myh9.2       | 7.42E-48 | 0.925  | 0.577 | 0.233 | 1.48E-43 | PA-5 |
| Celf2.1      | 1.22E-47 | -0.697 | 0.976 | 0.998 | 2.43E-43 | PA-5 |
| Map3k1       | 4.12E-47 | 0.878  | 0.399 | 0.117 | 8.22E-43 | PA-5 |
| Sgms1        | 4.37E-47 | 1.032  | 0.898 | 0.616 | 8.72E-43 | PA-5 |
| Mbnl1.1      | 5.19E-47 | 0.893  | 0.966 | 0.825 | 1.04E-42 | PA-5 |
| Gfpt2.4      | 1.55E-46 | -1.451 | 0.461 | 0.788 | 3.10E-42 | PA-5 |
| Ldb2.3       | 2.99E-46 | 1.401  | 0.703 | 0.325 | 5.97E-42 | PA-5 |
| Rbms3        | 5.64E-46 | -0.825 | 0.904 | 0.991 | 1.13E-41 | PA-5 |
| Opcml.3      | 6.82E-46 | -1.284 | 0.717 | 0.907 | 1.36E-41 | PA-5 |
| Creb5.3      | 7.41E-46 | -1.359 | 0.775 | 0.903 | 1.48E-41 | PA-5 |
| Casp8        | 1.70E-45 | 0.639  | 0.331 | 0.084 | 3.39E-41 | PA-5 |
| Cobll1.1     | 1.73E-45 | 0.783  | 0.348 | 0.089 | 3.46E-41 | PA-5 |
| Trim25       | 3.20E-45 | 0.725  | 0.362 | 0.1   | 6.39E-41 | PA-5 |
| Pi16.4       | 4.43E-45 | -1.837 | 0.389 | 0.741 | 8.83E-41 | PA-5 |
| Pnpla7       | 4.74E-45 | 0.680  | 0.334 | 0.087 | 9.46E-41 | PA-5 |
| 5031439G07Ri | 5.81E-45 | 0.609  | 0.328 | 0.084 | 1.16E-40 | PA-5 |
| Axl.3        | 1.11E-44 | -1.183 | 0.505 | 0.778 | 2.22E-40 | PA-5 |
| Gpc6.3       | 1.46E-44 | -1.008 | 0.874 | 0.984 | 2.92E-40 | PA-5 |
| Igf1.3       | 1.68E-44 | 0.738  | 0.573 | 0.215 | 3.36E-40 | PA-5 |
| Tbc1d1       | 1.34E-43 | 0.727  | 0.297 | 0.072 | 2.67E-39 | PA-5 |
| Ppp3ca.1     | 1.67E-43 | 0.924  | 0.952 | 0.79  | 3.33E-39 | PA-5 |
| Nrp1.3       | 2.61E-43 | 0.902  | 0.823 | 0.464 | 5.20E-39 | PA-5 |
| Itpkb        | 3.35E-43 | 0.944  | 0.505 | 0.188 | 6.68E-39 | PA-5 |
| Nav3.3       | 1.56E-42 | -1.624 | 0.676 | 0.843 | 3.11E-38 | PA-5 |
| Fnbp1l       | 1.87E-42 | 0.655  | 0.259 | 0.058 | 3.73E-38 | PA-5 |
| Fn1.3        | 4.53E-42 | -1.240 | 0.693 | 0.894 | 9.05E-38 | PA-5 |
| Anxa3.3      | 5.00E-42 | -1.337 | 0.642 | 0.823 | 9.97E-38 | PA-5 |
| Etv1         | 7.52E-42 | 0.665  | 0.266 | 0.06  | 1.50E-37 | PA-5 |
| Cmk1r1       | 8.62E-42 | 0.606  | 0.276 | 0.065 | 1.72E-37 | PA-5 |
| Clec3b.2     | 1.15E-41 | -1.321 | 0.601 | 0.85  | 2.30E-37 | PA-5 |
| Tgfb.2       | 1.30E-41 | 0.638  | 0.406 | 0.123 | 2.60E-37 | PA-5 |
| Kalrn.2      | 1.93E-41 | 1.304  | 0.375 | 0.116 | 3.85E-37 | PA-5 |
| Ebf2.3       | 3.02E-41 | -0.964 | 0.867 | 0.979 | 6.02E-37 | PA-5 |
| Tbc1d14      | 4.69E-41 | 0.729  | 0.369 | 0.111 | 9.35E-37 | PA-5 |
| Nova1.3      | 8.89E-41 | -1.080 | 0.785 | 0.933 | 1.77E-36 | PA-5 |
| Eps8.3       | 6.86E-40 | 0.828  | 0.758 | 0.386 | 1.37E-35 | PA-5 |
| Slc25a37     | 8.42E-40 | 0.597  | 0.317 | 0.085 | 1.68E-35 | PA-5 |
| Lpl.2        | 1.63E-39 | 1.005  | 0.42  | 0.142 | 3.26E-35 | PA-5 |
| Stk10        | 1.79E-39 | 0.644  | 0.266 | 0.064 | 3.57E-35 | PA-5 |
| Efemp1.3     | 2.63E-39 | -1.353 | 0.478 | 0.756 | 5.24E-35 | PA-5 |
| Mecom        | 3.77E-39 | 2.442  | 0.334 | 0.1   | 7.52E-35 | PA-5 |
| Tmcc1        | 5.66E-39 | 0.889  | 0.928 | 0.771 | 1.13E-34 | PA-5 |
| Ppm1h        | 1.68E-38 | 0.890  | 0.679 | 0.345 | 3.36E-34 | PA-5 |
| Dcn.2        | 1.81E-38 | -1.067 | 0.823 | 0.965 | 3.62E-34 | PA-5 |
| Tsc22d1      | 8.31E-38 | 0.982  | 0.666 | 0.339 | 1.66E-33 | PA-5 |
| Palld.2      | 2.12E-37 | 0.768  | 0.433 | 0.147 | 4.23E-33 | PA-5 |
| Fchs2        | 2.29E-37 | 1.013  | 0.689 | 0.383 | 4.57E-33 | PA-5 |
| Apobec3      | 2.89E-37 | 0.607  | 0.311 | 0.087 | 5.77E-33 | PA-5 |
| Rhobtb1.2    | 3.38E-37 | 0.746  | 0.447 | 0.16  | 6.75E-33 | PA-5 |
| Zeb2         | 4.85E-37 | 0.864  | 0.942 | 0.951 | 9.68E-33 | PA-5 |
| Gna12        | 1.18E-36 | 0.806  | 0.502 | 0.206 | 2.36E-32 | PA-5 |
| Prcp         | 1.22E-36 | 0.668  | 0.321 | 0.096 | 2.43E-32 | PA-5 |
| Syk          | 1.71E-36 | 0.875  | 0.584 | 0.27  | 3.40E-32 | PA-5 |
| Ank          | 2.24E-36 | 0.685  | 0.41  | 0.141 | 4.48E-32 | PA-5 |
| Slc43a3.2    | 3.31E-36 | -0.980 | 0.679 | 0.87  | 6.61E-32 | PA-5 |

|              |          |        |       |       |          |      |
|--------------|----------|--------|-------|-------|----------|------|
| Dpt.4        | 5.76E-36 | -1.351 | 0.416 | 0.705 | 1.15E-31 | PA-5 |
| Fnbp1.2      | 7.63E-36 | 0.982  | 0.686 | 0.386 | 1.52E-31 | PA-5 |
| Tcf4.2       | 1.67E-35 | 0.782  | 0.976 | 0.882 | 3.33E-31 | PA-5 |
| Serping1.2   | 1.77E-35 | -1.157 | 0.543 | 0.794 | 3.52E-31 | PA-5 |
| Col14a1.3    | 1.92E-35 | -1.189 | 0.608 | 0.814 | 3.83E-31 | PA-5 |
| Tanc2.1      | 4.57E-35 | 1.117  | 0.812 | 0.575 | 9.12E-31 | PA-5 |
| Adamts5.3    | 1.35E-34 | -1.127 | 0.679 | 0.854 | 2.69E-30 | PA-5 |
| Slco3a1.3    | 1.64E-34 | -1.020 | 0.642 | 0.827 | 3.28E-30 | PA-5 |
| Cerk         | 1.76E-34 | 0.739  | 0.451 | 0.178 | 3.51E-30 | PA-5 |
| Cd55.3       | 2.72E-34 | -1.332 | 0.406 | 0.693 | 5.43E-30 | PA-5 |
| Fggy         | 3.63E-34 | 0.557  | 0.273 | 0.072 | 7.24E-30 | PA-5 |
| Ppp1r13b     | 4.87E-34 | 0.648  | 0.259 | 0.068 | 9.72E-30 | PA-5 |
| Tgfbr3.1     | 5.98E-34 | -0.769 | 0.867 | 0.979 | 1.19E-29 | PA-5 |
| Pid1.3       | 7.49E-34 | 0.952  | 0.898 | 0.753 | 1.49E-29 | PA-5 |
| Ackr3.3      | 1.52E-33 | -1.278 | 0.358 | 0.654 | 3.03E-29 | PA-5 |
| Antxr1.2     | 1.91E-33 | -0.849 | 0.703 | 0.881 | 3.81E-29 | PA-5 |
| Slc16a10     | 2.28E-33 | 0.688  | 0.403 | 0.142 | 4.56E-29 | PA-5 |
| Tep1.1       | 2.53E-33 | 0.730  | 0.427 | 0.163 | 5.06E-29 | PA-5 |
| Picalm       | 2.54E-33 | 0.817  | 0.86  | 0.615 | 5.08E-29 | PA-5 |
| Chst11.1     | 2.64E-33 | 0.742  | 0.413 | 0.152 | 5.26E-29 | PA-5 |
| Skap2        | 4.05E-33 | 0.830  | 0.802 | 0.511 | 8.08E-29 | PA-5 |
| Smap2        | 4.55E-33 | 0.614  | 0.338 | 0.11  | 9.09E-29 | PA-5 |
| Cd34.1       | 8.80E-33 | -0.966 | 0.502 | 0.735 | 1.76E-28 | PA-5 |
| Scara5.3     | 9.26E-33 | -0.932 | 0.635 | 0.85  | 1.85E-28 | PA-5 |
| Adam12.3     | 1.05E-32 | 0.780  | 0.512 | 0.207 | 2.09E-28 | PA-5 |
| Osbp18       | 1.34E-32 | 0.757  | 0.778 | 0.453 | 2.68E-28 | PA-5 |
| Plxdc2.2     | 1.62E-32 | -0.817 | 0.887 | 0.961 | 3.23E-28 | PA-5 |
| Ahcyl2       | 2.24E-32 | 0.698  | 0.519 | 0.22  | 4.47E-28 | PA-5 |
| Pard3b       | 3.36E-32 | -0.651 | 0.949 | 0.984 | 6.71E-28 | PA-5 |
| Anxa1.3      | 4.68E-32 | -1.060 | 0.338 | 0.653 | 9.35E-28 | PA-5 |
| Ltbp1.3      | 5.09E-32 | -0.897 | 0.676 | 0.864 | 1.02E-27 | PA-5 |
| Dock10.3     | 5.16E-32 | 0.736  | 0.72  | 0.385 | 1.03E-27 | PA-5 |
| Iqgap2.1     | 6.54E-32 | 0.823  | 0.642 | 0.34  | 1.31E-27 | PA-5 |
| Heg1.2       | 1.00E-31 | -0.820 | 0.884 | 0.961 | 2.00E-27 | PA-5 |
| Plcb1.2      | 1.08E-31 | 1.168  | 0.512 | 0.229 | 2.15E-27 | PA-5 |
| Dapp1        | 1.12E-31 | 0.556  | 0.29  | 0.085 | 2.23E-27 | PA-5 |
| Pcolce2.3    | 1.67E-31 | -1.137 | 0.379 | 0.683 | 3.33E-27 | PA-5 |
| Ap1s2        | 1.80E-31 | 0.594  | 0.338 | 0.112 | 3.59E-27 | PA-5 |
| Selenop.2    | 2.41E-31 | 0.868  | 0.451 | 0.185 | 4.81E-27 | PA-5 |
| Rassf3       | 3.49E-31 | 0.681  | 0.365 | 0.127 | 6.96E-27 | PA-5 |
| Adamts11.4   | 3.85E-31 | -0.973 | 0.706 | 0.909 | 7.69E-27 | PA-5 |
| Hmox2        | 5.71E-31 | 0.569  | 0.314 | 0.101 | 1.14E-26 | PA-5 |
| Tpk1         | 1.14E-30 | 0.673  | 0.413 | 0.157 | 2.27E-26 | PA-5 |
| Zfhx4        | 5.12E-30 | -0.707 | 0.788 | 0.954 | 1.02E-25 | PA-5 |
| 2610507B11Ri | 5.19E-30 | 0.567  | 0.461 | 0.191 | 1.04E-25 | PA-5 |
| Arhgap31     | 5.30E-30 | 0.910  | 0.648 | 0.343 | 1.06E-25 | PA-5 |
| Vcan.3       | 5.34E-30 | -1.090 | 0.427 | 0.705 | 1.07E-25 | PA-5 |
| Igfbp6.3     | 9.74E-30 | -1.448 | 0.276 | 0.596 | 1.94E-25 | PA-5 |
| Sulf1.3      | 1.48E-29 | -0.859 | 0.703 | 0.863 | 2.95E-25 | PA-5 |
| Ankrd44      | 1.95E-29 | 0.764  | 0.73  | 0.446 | 3.89E-25 | PA-5 |
| Gm12353      | 2.06E-29 | 0.812  | 0.608 | 0.311 | 4.12E-25 | PA-5 |
| Rasa3.2      | 2.08E-29 | 0.544  | 0.498 | 0.204 | 4.15E-25 | PA-5 |
| Atp6v0a1.2   | 2.64E-29 | 0.733  | 0.577 | 0.292 | 5.27E-25 | PA-5 |
| Gpcpd1       | 3.26E-29 | 0.726  | 0.515 | 0.244 | 6.51E-25 | PA-5 |
| Tet3         | 3.45E-29 | 0.751  | 0.638 | 0.352 | 6.89E-25 | PA-5 |
| Alpk1        | 5.22E-29 | 0.595  | 0.386 | 0.141 | 1.04E-24 | PA-5 |
| Gda.1        | 6.33E-29 | 0.813  | 0.734 | 0.45  | 1.26E-24 | PA-5 |
| Lrrfip1.1    | 1.05E-28 | 0.652  | 0.457 | 0.195 | 2.09E-24 | PA-5 |
| Pkn1         | 1.32E-28 | 0.543  | 0.369 | 0.137 | 2.64E-24 | PA-5 |
| Tbc1d22a     | 1.36E-28 | 0.687  | 0.529 | 0.246 | 2.71E-24 | PA-5 |
| Igfbp5.3     | 1.59E-28 | -1.739 | 0.345 | 0.632 | 3.18E-24 | PA-5 |
| Arhgap42.2   | 1.84E-28 | -0.845 | 0.666 | 0.862 | 3.68E-24 | PA-5 |

|           |          |        |       |       |          |      |
|-----------|----------|--------|-------|-------|----------|------|
| Sema6a    | 2.11E-28 | 1.160  | 0.451 | 0.2   | 4.22E-24 | PA-5 |
| Sgpl1     | 2.26E-28 | 0.574  | 0.389 | 0.15  | 4.51E-24 | PA-5 |
| Sema3e.3  | 2.80E-28 | -1.473 | 0.273 | 0.586 | 5.58E-24 | PA-5 |
| Sgk3      | 3.17E-28 | 0.636  | 0.451 | 0.189 | 6.33E-24 | PA-5 |
| Hdac7.3   | 4.09E-28 | -0.876 | 0.621 | 0.796 | 8.16E-24 | PA-5 |
| Rasa1     | 4.41E-28 | 0.774  | 0.676 | 0.396 | 8.81E-24 | PA-5 |
| Nxn.1     | 2.42E-27 | 1.325  | 0.355 | 0.138 | 4.83E-23 | PA-5 |
| Emilin2.3 | 3.32E-27 | -1.022 | 0.297 | 0.584 | 6.63E-23 | PA-5 |
| Tspan5.2  | 4.35E-27 | -0.735 | 0.819 | 0.935 | 8.67E-23 | PA-5 |
| C3.3      | 4.96E-27 | -1.531 | 0.283 | 0.572 | 9.91E-23 | PA-5 |
| Limch1.3  | 7.70E-27 | -1.175 | 0.403 | 0.653 | 1.54E-22 | PA-5 |
| Ston2.3   | 8.98E-27 | -1.137 | 0.331 | 0.611 | 1.79E-22 | PA-5 |
| Piezo1.1  | 9.56E-27 | 0.513  | 0.27  | 0.086 | 1.91E-22 | PA-5 |
| Galnt16.3 | 1.44E-26 | -1.035 | 0.416 | 0.663 | 2.88E-22 | PA-5 |
| Ets1      | 1.48E-26 | 0.786  | 0.29  | 0.099 | 2.95E-22 | PA-5 |
| Ptbp3     | 1.80E-26 | 0.679  | 0.751 | 0.449 | 3.60E-22 | PA-5 |
| Pla1a.4   | 1.85E-26 | -1.082 | 0.375 | 0.614 | 3.69E-22 | PA-5 |
| Rnf130    | 1.85E-26 | 0.595  | 0.553 | 0.273 | 3.70E-22 | PA-5 |
| Mdfic     | 2.52E-26 | 0.760  | 0.679 | 0.409 | 5.04E-22 | PA-5 |
| Snx2      | 2.59E-26 | 0.686  | 0.587 | 0.308 | 5.17E-22 | PA-5 |
| Tshz2     | 3.78E-26 | -0.635 | 0.952 | 0.979 | 7.54E-22 | PA-5 |
| Errfi1.3  | 4.19E-26 | -1.154 | 0.461 | 0.694 | 8.36E-22 | PA-5 |
| Abr       | 6.53E-26 | 0.516  | 0.307 | 0.106 | 1.30E-21 | PA-5 |
| Prkca.3   | 7.01E-26 | -0.721 | 0.792 | 0.918 | 1.40E-21 | PA-5 |
| Col4a2.3  | 1.02E-25 | 0.557  | 0.693 | 0.37  | 2.03E-21 | PA-5 |
| Cdk17     | 1.05E-25 | 0.805  | 0.502 | 0.242 | 2.10E-21 | PA-5 |
| Man1c1.1  | 1.12E-25 | 0.672  | 0.621 | 0.352 | 2.24E-21 | PA-5 |
| Timp2.3   | 1.20E-25 | -1.145 | 0.444 | 0.69  | 2.39E-21 | PA-5 |
| Mgat5     | 1.56E-25 | 0.597  | 0.502 | 0.231 | 3.11E-21 | PA-5 |
| Antxr2    | 3.01E-25 | -0.831 | 0.775 | 0.892 | 6.01E-21 | PA-5 |
| Cltc      | 3.17E-25 | 0.701  | 0.614 | 0.35  | 6.33E-21 | PA-5 |
| Fbxw7     | 3.23E-25 | 0.670  | 0.611 | 0.333 | 6.44E-21 | PA-5 |
| Ap2a2     | 3.85E-25 | 0.746  | 0.751 | 0.532 | 7.68E-21 | PA-5 |
| Acer3     | 4.50E-25 | 0.784  | 0.594 | 0.313 | 8.99E-21 | PA-5 |
| Etv6      | 4.68E-25 | 0.671  | 0.833 | 0.626 | 9.33E-21 | PA-5 |
| Aftph     | 7.23E-25 | 0.828  | 0.638 | 0.383 | 1.44E-20 | PA-5 |
| Tpcn1     | 1.60E-24 | 0.534  | 0.324 | 0.122 | 3.20E-20 | PA-5 |
| Sept11.3  | 2.71E-24 | 0.710  | 0.621 | 0.343 | 5.41E-20 | PA-5 |
| Dgkh      | 3.21E-24 | 0.673  | 0.454 | 0.204 | 6.40E-20 | PA-5 |
| Col1a2.2  | 3.67E-24 | -0.694 | 0.826 | 0.949 | 7.32E-20 | PA-5 |
| Snx30     | 5.30E-24 | 0.654  | 0.379 | 0.159 | 1.06E-19 | PA-5 |
| Tmeff2    | 6.12E-24 | -0.635 | 0.826 | 0.974 | 1.22E-19 | PA-5 |
| Lamc1.1   | 8.53E-24 | -0.638 | 0.833 | 0.924 | 1.70E-19 | PA-5 |
| Magi1.1   | 9.12E-24 | 1.340  | 0.659 | 0.403 | 1.82E-19 | PA-5 |
| Sema6d    | 9.89E-24 | 0.530  | 0.28  | 0.097 | 1.97E-19 | PA-5 |
| Plpp1.3   | 1.42E-23 | 0.698  | 0.553 | 0.289 | 2.83E-19 | PA-5 |
| Cdon      | 1.42E-23 | -0.851 | 0.532 | 0.738 | 2.84E-19 | PA-5 |
| Tmem164   | 3.20E-23 | 0.678  | 0.751 | 0.511 | 6.39E-19 | PA-5 |
| Col4a1.3  | 3.26E-23 | 0.604  | 0.758 | 0.453 | 6.51E-19 | PA-5 |
| Plce1.2   | 4.06E-23 | -0.672 | 0.778 | 0.908 | 8.11E-19 | PA-5 |
| Tsc22d3   | 4.47E-23 | 0.506  | 0.461 | 0.212 | 8.92E-19 | PA-5 |
| Atxn1.2   | 5.55E-23 | 0.691  | 0.792 | 0.582 | 1.11E-18 | PA-5 |
| Hpcal1    | 7.00E-23 | 0.675  | 0.546 | 0.298 | 1.40E-18 | PA-5 |
| Zbtb46    | 8.93E-23 | 0.568  | 0.283 | 0.1   | 1.78E-18 | PA-5 |
| Etl4      | 1.01E-22 | 1.867  | 0.287 | 0.111 | 2.02E-18 | PA-5 |
| Foxn3.1   | 1.08E-22 | 0.618  | 0.918 | 0.771 | 2.16E-18 | PA-5 |
| Ophn1     | 1.09E-22 | 0.685  | 0.799 | 0.644 | 2.18E-18 | PA-5 |
| Adgrg2.4  | 1.59E-22 | -1.022 | 0.188 | 0.47  | 3.18E-18 | PA-5 |
| Mef2c.1   | 1.65E-22 | 0.751  | 0.758 | 0.518 | 3.29E-18 | PA-5 |
| Rnpep     | 2.33E-22 | 0.523  | 0.345 | 0.141 | 4.66E-18 | PA-5 |
| Efh1.3    | 2.58E-22 | -1.136 | 0.201 | 0.463 | 5.14E-18 | PA-5 |
| Itpr1.2   | 2.73E-22 | 0.914  | 0.553 | 0.31  | 5.46E-18 | PA-5 |

|            |          |        |       |       |          |      |
|------------|----------|--------|-------|-------|----------|------|
| Zfp710     | 2.89E-22 | 0.571  | 0.512 | 0.258 | 5.77E-18 | PA-5 |
| Gm37033    | 5.51E-22 | 0.510  | 0.294 | 0.109 | 1.10E-17 | PA-5 |
| Loxl1      | 6.76E-22 | -0.855 | 0.382 | 0.599 | 1.35E-17 | PA-5 |
| Medag      | 8.51E-22 | -0.786 | 0.57  | 0.748 | 1.70E-17 | PA-5 |
| Ecm1.2     | 1.04E-21 | -0.993 | 0.341 | 0.595 | 2.07E-17 | PA-5 |
| Slc4a4.3   | 1.24E-21 | -0.733 | 0.686 | 0.864 | 2.47E-17 | PA-5 |
| Zfp521     | 1.51E-21 | -0.557 | 0.857 | 0.938 | 3.02E-17 | PA-5 |
| lldr2.3    | 1.85E-21 | -1.103 | 0.239 | 0.492 | 3.69E-17 | PA-5 |
| Gnaq       | 2.17E-21 | 0.575  | 0.935 | 0.852 | 4.33E-17 | PA-5 |
| Sh3d19.1   | 2.75E-21 | -0.637 | 0.73  | 0.868 | 5.48E-17 | PA-5 |
| Pde8a.3    | 4.13E-21 | -0.829 | 0.584 | 0.737 | 8.25E-17 | PA-5 |
| Fyn.3      | 4.22E-21 | -0.576 | 0.758 | 0.874 | 8.42E-17 | PA-5 |
| Hip1       | 5.16E-21 | 0.724  | 0.676 | 0.433 | 1.03E-16 | PA-5 |
| Rab8b      | 5.87E-21 | 0.682  | 0.706 | 0.478 | 1.17E-16 | PA-5 |
| Arhgap20   | 6.41E-21 | -0.863 | 0.338 | 0.579 | 1.28E-16 | PA-5 |
| Cp.3       | 7.43E-21 | 1.053  | 0.41  | 0.195 | 1.48E-16 | PA-5 |
| Uap1.3     | 8.55E-21 | -0.994 | 0.474 | 0.657 | 1.71E-16 | PA-5 |
| Ugdh.4     | 1.07E-20 | -0.985 | 0.334 | 0.579 | 2.14E-16 | PA-5 |
| Raph1.2    | 1.18E-20 | 0.649  | 0.71  | 0.485 | 2.36E-16 | PA-5 |
| Tank       | 1.26E-20 | 0.571  | 0.519 | 0.27  | 2.52E-16 | PA-5 |
| Dlc1       | 1.32E-20 | -0.534 | 0.952 | 0.994 | 2.64E-16 | PA-5 |
| Zeb1.2     | 1.40E-20 | -0.596 | 0.922 | 0.957 | 2.79E-16 | PA-5 |
| Rassf2     | 1.49E-20 | 0.536  | 0.474 | 0.235 | 2.97E-16 | PA-5 |
| Cd248.3    | 1.79E-20 | -1.065 | 0.242 | 0.488 | 3.58E-16 | PA-5 |
| mt-Co1.2   | 1.83E-20 | 0.730  | 0.993 | 0.961 | 3.65E-16 | PA-5 |
| Plpp3.4    | 2.33E-20 | -0.848 | 0.819 | 0.883 | 4.65E-16 | PA-5 |
| mt-Nd6.2   | 3.97E-20 | 0.660  | 0.686 | 0.424 | 7.93E-16 | PA-5 |
| Actr3      | 4.44E-20 | 0.608  | 0.584 | 0.338 | 8.87E-16 | PA-5 |
| Arrb1      | 5.65E-20 | 0.562  | 0.355 | 0.155 | 1.13E-15 | PA-5 |
| Prss23.3   | 6.98E-20 | -0.985 | 0.201 | 0.453 | 1.39E-15 | PA-5 |
| Man1a.1    | 7.01E-20 | -0.585 | 0.918 | 0.968 | 1.40E-15 | PA-5 |
| Tek.4      | 7.21E-20 | -0.850 | 0.471 | 0.67  | 1.44E-15 | PA-5 |
| Ano3.3     | 8.38E-20 | -1.110 | 0.246 | 0.5   | 1.67E-15 | PA-5 |
| Osbpl9     | 9.52E-20 | 0.727  | 0.84  | 0.702 | 1.90E-15 | PA-5 |
| Lvrn.3     | 9.72E-20 | -1.002 | 0.314 | 0.572 | 1.94E-15 | PA-5 |
| Sh3pxd2a.3 | 1.06E-19 | 0.523  | 0.41  | 0.19  | 2.12E-15 | PA-5 |
| mt-Rnr2.2  | 1.20E-19 | 0.677  | 0.986 | 0.907 | 2.39E-15 | PA-5 |
| Tspan14    | 1.26E-19 | 0.547  | 0.406 | 0.191 | 2.51E-15 | PA-5 |
| Lurap1l.3  | 1.58E-19 | -0.958 | 0.3   | 0.548 | 3.15E-15 | PA-5 |
| Ehbp1      | 1.68E-19 | -0.585 | 0.816 | 0.932 | 3.36E-15 | PA-5 |
| Snrk.2     | 1.78E-19 | 0.828  | 0.478 | 0.264 | 3.55E-15 | PA-5 |
| Pcsk6.3    | 2.31E-19 | -0.936 | 0.379 | 0.61  | 4.62E-15 | PA-5 |
| Zfp462.3   | 3.26E-19 | -0.900 | 0.461 | 0.651 | 6.50E-15 | PA-5 |
| Tbc1d4     | 3.30E-19 | 0.609  | 0.642 | 0.392 | 6.58E-15 | PA-5 |
| Cd44.1     | 7.20E-19 | 0.700  | 0.454 | 0.237 | 1.44E-14 | PA-5 |
| Htra3      | 7.28E-19 | -0.729 | 0.539 | 0.724 | 1.45E-14 | PA-5 |
| Fgf2.3     | 9.76E-19 | -0.817 | 0.297 | 0.538 | 1.95E-14 | PA-5 |
| Lama4.1    | 1.14E-18 | -0.551 | 0.73  | 0.832 | 2.29E-14 | PA-5 |
| Synj1      | 1.51E-18 | 0.600  | 0.584 | 0.373 | 3.01E-14 | PA-5 |
| Mical2     | 1.76E-18 | 0.543  | 0.266 | 0.104 | 3.51E-14 | PA-5 |
| Ly6a.3     | 1.83E-18 | -1.063 | 0.392 | 0.599 | 3.65E-14 | PA-5 |
| Rnase4.1   | 1.95E-18 | -0.919 | 0.205 | 0.447 | 3.88E-14 | PA-5 |
| Bmp1.1     | 2.03E-18 | -0.709 | 0.43  | 0.619 | 4.04E-14 | PA-5 |
| Il1rl2.3   | 2.07E-18 | -0.818 | 0.491 | 0.691 | 4.13E-14 | PA-5 |
| Sgip1.3    | 2.48E-18 | 0.503  | 0.444 | 0.212 | 4.96E-14 | PA-5 |
| Nr1h4.4    | 2.49E-18 | -1.042 | 0.174 | 0.413 | 4.97E-14 | PA-5 |
| Kif2a.3    | 2.62E-18 | -0.781 | 0.474 | 0.659 | 5.22E-14 | PA-5 |
| Adamts16.4 | 3.40E-18 | -1.222 | 0.082 | 0.322 | 6.79E-14 | PA-5 |
| Slc6a6     | 3.60E-18 | 0.507  | 0.338 | 0.152 | 7.18E-14 | PA-5 |
| Car8.3     | 4.41E-18 | -0.973 | 0.147 | 0.388 | 8.80E-14 | PA-5 |
| Cdc42se2   | 4.46E-18 | 0.520  | 0.577 | 0.33  | 8.91E-14 | PA-5 |
| Dnmt3a     | 4.86E-18 | 0.623  | 0.618 | 0.395 | 9.70E-14 | PA-5 |

|            |          |        |       |       |          |      |
|------------|----------|--------|-------|-------|----------|------|
| Flrt2.2    | 5.75E-18 | -0.799 | 0.713 | 0.842 | 1.15E-13 | PA-5 |
| Naaladl2.1 | 7.37E-18 | -0.570 | 0.867 | 0.972 | 1.47E-13 | PA-5 |
| Jarid2     | 7.57E-18 | 0.643  | 0.713 | 0.501 | 1.51E-13 | PA-5 |
| mt-Nd5.2   | 9.54E-18 | 0.653  | 0.915 | 0.778 | 1.90E-13 | PA-5 |
| Klhl29.2   | 1.00E-17 | -0.839 | 0.386 | 0.605 | 2.01E-13 | PA-5 |
| Cbl        | 1.50E-17 | 0.566  | 0.601 | 0.373 | 3.00E-13 | PA-5 |
| Slc24a3.2  | 2.50E-17 | 0.564  | 0.491 | 0.268 | 4.99E-13 | PA-5 |
| Aldh1a3.3  | 2.87E-17 | -1.027 | 0.147 | 0.368 | 5.74E-13 | PA-5 |
| Mapk14     | 2.88E-17 | 0.605  | 0.659 | 0.468 | 5.76E-13 | PA-5 |
| Kitl.2     | 4.20E-17 | 0.653  | 0.536 | 0.314 | 8.38E-13 | PA-5 |
| Klf4.3     | 4.24E-17 | -0.817 | 0.29  | 0.518 | 8.46E-13 | PA-5 |
| Gfod1      | 4.58E-17 | 0.764  | 0.266 | 0.109 | 9.15E-13 | PA-5 |
| Inpp4a     | 4.87E-17 | 0.524  | 0.505 | 0.279 | 9.72E-13 | PA-5 |
| Nox4.1     | 4.91E-17 | -0.783 | 0.71  | 0.865 | 9.80E-13 | PA-5 |
| Plekhm3    | 4.94E-17 | 0.548  | 0.635 | 0.427 | 9.85E-13 | PA-5 |
| Clip1.3    | 4.98E-17 | -0.653 | 0.584 | 0.734 | 9.94E-13 | PA-5 |
| Pitpna     | 5.10E-17 | 0.598  | 0.655 | 0.452 | 1.02E-12 | PA-5 |
| Mast4.2    | 5.19E-17 | -0.672 | 0.942 | 0.942 | 1.04E-12 | PA-5 |
| Rnf169     | 5.25E-17 | 0.635  | 0.686 | 0.479 | 1.05E-12 | PA-5 |
| Aebp1.2    | 5.32E-17 | -1.018 | 0.352 | 0.553 | 1.06E-12 | PA-5 |
| Pde7b.1    | 5.33E-17 | 0.672  | 0.556 | 0.33  | 1.06E-12 | PA-5 |
| Marcks.3   | 6.27E-17 | -0.872 | 0.423 | 0.607 | 1.25E-12 | PA-5 |
| Sox5       | 6.29E-17 | -0.520 | 0.881 | 0.954 | 1.26E-12 | PA-5 |
| Mitf.1     | 6.61E-17 | 0.531  | 0.85  | 0.764 | 1.32E-12 | PA-5 |
| Fndc3a     | 7.34E-17 | 0.582  | 0.659 | 0.464 | 1.46E-12 | PA-5 |
| mt-Nd4l.2  | 7.82E-17 | 0.645  | 0.908 | 0.749 | 1.56E-12 | PA-5 |
| Dcbld2.2   | 1.16E-16 | -0.684 | 0.57  | 0.717 | 2.31E-12 | PA-5 |
| Reps2.3    | 1.34E-16 | 0.585  | 0.546 | 0.313 | 2.67E-12 | PA-5 |
| Rarres2.1  | 1.57E-16 | -0.937 | 0.106 | 0.329 | 3.13E-12 | PA-5 |
| Sbsn.3     | 1.69E-16 | -1.089 | 0.061 | 0.277 | 3.38E-12 | PA-5 |
| mt-Co2.3   | 1.81E-16 | 0.657  | 0.993 | 0.945 | 3.61E-12 | PA-5 |
| Dact2.3    | 2.36E-16 | -1.089 | 0.096 | 0.317 | 4.71E-12 | PA-5 |
| BC005537   | 3.04E-16 | 0.529  | 0.447 | 0.248 | 6.07E-12 | PA-5 |
| Sh3bgrl    | 3.05E-16 | 0.584  | 0.546 | 0.312 | 6.10E-12 | PA-5 |
| Aopep      | 4.11E-16 | 0.504  | 0.734 | 0.51  | 8.20E-12 | PA-5 |
| Aff3.2     | 4.68E-16 | 0.751  | 0.614 | 0.424 | 9.34E-12 | PA-5 |
| Maf.2      | 4.75E-16 | 0.655  | 0.761 | 0.582 | 9.47E-12 | PA-5 |
| Prrx1      | 5.58E-16 | -0.528 | 0.788 | 0.915 | 1.11E-11 | PA-5 |
| Pamr1.2    | 6.30E-16 | -0.740 | 0.358 | 0.556 | 1.26E-11 | PA-5 |
| Enox2      | 7.73E-16 | 0.505  | 0.693 | 0.452 | 1.54E-11 | PA-5 |
| Ugp2.2     | 7.94E-16 | -0.849 | 0.481 | 0.632 | 1.59E-11 | PA-5 |
| Magi2      | 1.05E-15 | -0.673 | 0.795 | 0.879 | 2.10E-11 | PA-5 |
| Col5a1     | 1.11E-15 | -0.573 | 0.604 | 0.746 | 2.22E-11 | PA-5 |
| Spsb1.3    | 1.16E-15 | -0.819 | 0.297 | 0.516 | 2.31E-11 | PA-5 |
| Scara3.2   | 1.16E-15 | -0.719 | 0.191 | 0.413 | 2.31E-11 | PA-5 |
| Adam33.2   | 1.21E-15 | -0.728 | 0.444 | 0.636 | 2.42E-11 | PA-5 |
| Bicc1      | 1.25E-15 | -0.507 | 0.833 | 0.954 | 2.49E-11 | PA-5 |
| Fnip2      | 1.38E-15 | 0.585  | 0.584 | 0.37  | 2.76E-11 | PA-5 |
| Gtdc1      | 1.66E-15 | 0.516  | 0.526 | 0.297 | 3.32E-11 | PA-5 |
| Smpd3.4    | 1.97E-15 | -0.987 | 0.362 | 0.565 | 3.93E-11 | PA-5 |
| Phactr2    | 2.26E-15 | 0.624  | 0.594 | 0.391 | 4.50E-11 | PA-5 |
| Mef2a      | 2.97E-15 | 0.503  | 0.87  | 0.732 | 5.93E-11 | PA-5 |
| Rorb.3     | 3.03E-15 | -1.028 | 0.273 | 0.483 | 6.06E-11 | PA-5 |
| Pdgfra.2   | 3.91E-15 | -0.660 | 0.488 | 0.691 | 7.81E-11 | PA-5 |
| Tmem100.3  | 4.35E-15 | -0.787 | 0.15  | 0.361 | 8.69E-11 | PA-5 |
| Lims2.3    | 5.16E-15 | -0.672 | 0.454 | 0.627 | 1.03E-10 | PA-5 |
| Cyth1      | 5.64E-15 | 0.569  | 0.502 | 0.306 | 1.13E-10 | PA-5 |
| Adams2     | 6.99E-15 | -0.605 | 0.59  | 0.721 | 1.40E-10 | PA-5 |
| Dip2b      | 9.64E-15 | 0.640  | 0.655 | 0.482 | 1.92E-10 | PA-5 |
| Inpp4b     | 1.05E-14 | 0.643  | 0.297 | 0.134 | 2.10E-10 | PA-5 |
| Dpysl3     | 1.08E-14 | -0.678 | 0.563 | 0.714 | 2.15E-10 | PA-5 |
| Abca9      | 1.10E-14 | 0.537  | 0.662 | 0.448 | 2.19E-10 | PA-5 |

|            |          |        |       |       |          |      |
|------------|----------|--------|-------|-------|----------|------|
| Srgap1.1   | 1.16E-14 | -0.607 | 0.683 | 0.839 | 2.32E-10 | PA-5 |
| mt-Atp6.2  | 1.23E-14 | 0.587  | 0.997 | 0.953 | 2.46E-10 | PA-5 |
| Fgd4.1     | 1.29E-14 | 0.623  | 0.666 | 0.477 | 2.57E-10 | PA-5 |
| Smurf2.3   | 1.31E-14 | -0.687 | 0.812 | 0.871 | 2.62E-10 | PA-5 |
| mt-Co3.3   | 2.02E-14 | 0.580  | 0.997 | 0.954 | 4.03E-10 | PA-5 |
| mt-Rnr1.1  | 2.22E-14 | 0.510  | 0.969 | 0.906 | 4.44E-10 | PA-5 |
| Ppp2r2b.3  | 3.41E-14 | -1.065 | 0.235 | 0.437 | 6.80E-10 | PA-5 |
| Sparc      | 5.25E-14 | -0.662 | 0.71  | 0.822 | 1.05E-09 | PA-5 |
| Camk1d     | 8.65E-14 | -0.677 | 0.85  | 0.87  | 1.73E-09 | PA-5 |
| Slc7a6.1   | 9.02E-14 | -0.697 | 0.253 | 0.442 | 1.80E-09 | PA-5 |
| Reck       | 9.45E-14 | -0.681 | 0.324 | 0.508 | 1.89E-09 | PA-5 |
| Ogn.3      | 1.12E-13 | -0.772 | 0.481 | 0.625 | 2.23E-09 | PA-5 |
| Gsn.4      | 1.17E-13 | -0.746 | 0.853 | 0.914 | 2.34E-09 | PA-5 |
| mt-Nd4.2   | 1.21E-13 | 0.607  | 0.976 | 0.907 | 2.41E-09 | PA-5 |
| Serpinf1.2 | 1.30E-13 | -0.760 | 0.413 | 0.59  | 2.60E-09 | PA-5 |
| Ddx60      | 1.39E-13 | 0.581  | 0.437 | 0.255 | 2.77E-09 | PA-5 |
| Thbd.2     | 2.23E-13 | -0.742 | 0.096 | 0.287 | 4.45E-09 | PA-5 |
| Hecw2      | 2.70E-13 | -0.600 | 0.611 | 0.754 | 5.40E-09 | PA-5 |
| Rasal2     | 2.92E-13 | 0.562  | 0.659 | 0.455 | 5.82E-09 | PA-5 |
| Cmah.3     | 3.00E-13 | -0.882 | 0.468 | 0.609 | 5.99E-09 | PA-5 |
| Nhs1.3     | 3.41E-13 | -0.640 | 0.601 | 0.746 | 6.80E-09 | PA-5 |
| Cadm3.2    | 4.60E-13 | -0.709 | 0.16  | 0.352 | 9.18E-09 | PA-5 |
| Itih5.1    | 4.94E-13 | -0.650 | 0.549 | 0.651 | 9.87E-09 | PA-5 |
| Gan.3      | 6.36E-13 | -0.993 | 0.307 | 0.478 | 1.27E-08 | PA-5 |
| Calu       | 6.98E-13 | -0.589 | 0.352 | 0.525 | 1.39E-08 | PA-5 |
| Ntn4.3     | 7.99E-13 | -0.746 | 0.307 | 0.499 | 1.59E-08 | PA-5 |
| Cd47.2     | 8.01E-13 | -0.517 | 0.686 | 0.738 | 1.60E-08 | PA-5 |
| Apba1      | 8.12E-13 | 0.505  | 0.724 | 0.541 | 1.62E-08 | PA-5 |
| Prex2.3    | 9.66E-13 | 0.665  | 0.655 | 0.448 | 1.93E-08 | PA-5 |
| Tut7       | 1.17E-12 | 0.516  | 0.618 | 0.44  | 2.33E-08 | PA-5 |
| Aspn.1     | 1.51E-12 | -0.751 | 0.423 | 0.584 | 3.02E-08 | PA-5 |
| Vgll3.2    | 1.63E-12 | -0.736 | 0.522 | 0.663 | 3.26E-08 | PA-5 |
| Rps15.2    | 1.87E-12 | -0.875 | 0.099 | 0.29  | 3.73E-08 | PA-5 |
| Fxyd1      | 2.16E-12 | -0.563 | 0.082 | 0.258 | 4.30E-08 | PA-5 |
| Ly6c1.3    | 2.16E-12 | -0.519 | 0.239 | 0.433 | 4.31E-08 | PA-5 |
| Rgs6.3     | 2.20E-12 | -1.034 | 0.215 | 0.406 | 4.40E-08 | PA-5 |
| Kank1.3    | 2.53E-12 | -0.813 | 0.253 | 0.432 | 5.06E-08 | PA-5 |
| Igfbp4.3   | 2.66E-12 | -0.766 | 0.27  | 0.45  | 5.30E-08 | PA-5 |
| Procr.4    | 2.73E-12 | -0.725 | 0.164 | 0.352 | 5.45E-08 | PA-5 |
| Atp5o.1    | 2.79E-12 | 0.522  | 0.553 | 0.37  | 5.57E-08 | PA-5 |
| Gstm1.1    | 3.70E-12 | -0.607 | 0.085 | 0.263 | 7.38E-08 | PA-5 |
| Tbc1d12.3  | 3.96E-12 | -0.570 | 0.43  | 0.592 | 7.91E-08 | PA-5 |
| Tmcc3      | 4.24E-12 | 0.546  | 0.666 | 0.478 | 8.45E-08 | PA-5 |
| Islr.1     | 5.77E-12 | -0.646 | 0.157 | 0.342 | 1.15E-07 | PA-5 |
| Arl4a.2    | 6.39E-12 | -0.658 | 0.249 | 0.422 | 1.28E-07 | PA-5 |
| Psap       | 6.40E-12 | 0.655  | 0.334 | 0.179 | 1.28E-07 | PA-5 |
| Klf2.3     | 8.31E-12 | -0.669 | 0.14  | 0.323 | 1.66E-07 | PA-5 |
| Itga11.3   | 8.91E-12 | -0.647 | 0.328 | 0.506 | 1.78E-07 | PA-5 |
| Xiap       | 9.22E-12 | 0.501  | 0.686 | 0.518 | 1.84E-07 | PA-5 |
| Gm33869.2  | 9.98E-12 | -0.603 | 0.266 | 0.45  | 1.99E-07 | PA-5 |
| Klf12.3    | 1.12E-11 | -0.612 | 0.522 | 0.662 | 2.23E-07 | PA-5 |
| Pdzd2.3    | 1.20E-11 | -0.669 | 0.43  | 0.583 | 2.41E-07 | PA-5 |
| Slc1a5     | 1.25E-11 | -0.585 | 0.457 | 0.598 | 2.49E-07 | PA-5 |
| Dock9.3    | 1.31E-11 | 0.708  | 0.642 | 0.467 | 2.61E-07 | PA-5 |
| Radil      | 1.65E-11 | -0.581 | 0.256 | 0.44  | 3.30E-07 | PA-5 |
| Dbn1.3     | 2.28E-11 | -0.641 | 0.242 | 0.407 | 4.56E-07 | PA-5 |
| Epb41l3.2  | 2.30E-11 | -0.686 | 0.242 | 0.415 | 4.60E-07 | PA-5 |
| Wnt2.3     | 2.38E-11 | -0.647 | 0.085 | 0.255 | 4.74E-07 | PA-5 |
| Arhgef28.3 | 2.48E-11 | -0.569 | 0.488 | 0.636 | 4.94E-07 | PA-5 |
| Sestd1.3   | 4.12E-11 | -0.585 | 0.522 | 0.661 | 8.22E-07 | PA-5 |
| Vegfc.2    | 4.89E-11 | 0.613  | 0.372 | 0.206 | 9.77E-07 | PA-5 |
| Csf1       | 5.03E-11 | -0.551 | 0.27  | 0.442 | 1.00E-06 | PA-5 |

|              |          |        |       |       |             |      |
|--------------|----------|--------|-------|-------|-------------|------|
| Dact1.2      | 6.00E-11 | -0.706 | 0.212 | 0.368 | 1.20E-06    | PA-5 |
| Robo1.3      | 6.59E-11 | -0.840 | 0.427 | 0.571 | 1.32E-06    | PA-5 |
| Rhoa.1       | 6.82E-11 | -0.503 | 0.481 | 0.639 | 1.36E-06    | PA-5 |
| Ptpnj.3      | 9.02E-11 | 0.706  | 0.867 | 0.735 | 1.80E-06    | PA-5 |
| S100a10      | 1.20E-10 | -0.771 | 0.123 | 0.294 | 2.39E-06    | PA-5 |
| Sytl2.3      | 1.20E-10 | -0.637 | 0.119 | 0.285 | 2.39E-06    | PA-5 |
| Rps21.3      | 1.29E-10 | -0.879 | 0.177 | 0.351 | 2.58E-06    | PA-5 |
| Abca6.2      | 1.45E-10 | -0.585 | 0.423 | 0.576 | 2.90E-06    | PA-5 |
| Ccdc80.2     | 1.47E-10 | -0.699 | 0.549 | 0.674 | 2.94E-06    | PA-5 |
| Ahnak.1      | 1.59E-10 | -0.587 | 0.799 | 0.843 | 3.18E-06    | PA-5 |
| Cep112.1     | 2.01E-10 | -0.649 | 0.577 | 0.655 | 4.01E-06    | PA-5 |
| S100a6       | 2.02E-10 | -1.289 | 0.242 | 0.396 | 4.04E-06    | PA-5 |
| Col1a1.3     | 2.07E-10 | -0.558 | 0.7   | 0.78  | 4.12E-06    | PA-5 |
| Fbln2.1      | 2.09E-10 | -0.659 | 0.556 | 0.675 | 4.18E-06    | PA-5 |
| Il18.3       | 3.05E-10 | -0.623 | 0.157 | 0.316 | 6.09E-06    | PA-5 |
| Plat.1       | 3.15E-10 | -0.630 | 0.253 | 0.411 | 6.29E-06    | PA-5 |
| Cmss1.1      | 3.22E-10 | -0.784 | 0.72  | 0.791 | 6.42E-06    | PA-5 |
| mt-Nd2.1     | 3.85E-10 | 0.529  | 0.962 | 0.902 | 7.69E-06    | PA-5 |
| Lsp1.1       | 3.96E-10 | -0.525 | 0.396 | 0.551 | 7.90E-06    | PA-5 |
| Negr1.3      | 5.37E-10 | -0.947 | 0.457 | 0.563 | 1.07E-05    | PA-5 |
| Ar           | 6.22E-10 | -0.534 | 0.604 | 0.711 | 1.24E-05    | PA-5 |
| Dusp1.1      | 6.63E-10 | -0.589 | 0.133 | 0.29  | 1.32E-05    | PA-5 |
| Irak3.1      | 6.71E-10 | -0.525 | 0.43  | 0.564 | 1.34E-05    | PA-5 |
| Lbp.1        | 6.99E-10 | -0.540 | 0.174 | 0.338 | 1.40E-05    | PA-5 |
| Thbs3        | 7.92E-10 | -0.535 | 0.235 | 0.4   | 1.58E-05    | PA-5 |
| C1ra.1       | 7.95E-10 | -0.529 | 0.212 | 0.381 | 1.59E-05    | PA-5 |
| Serpinh1.1   | 8.33E-10 | -0.608 | 0.294 | 0.452 | 1.66E-05    | PA-5 |
| Abca5.3      | 8.53E-10 | -0.617 | 0.201 | 0.359 | 1.70E-05    | PA-5 |
| S100a11.1    | 8.82E-10 | -0.810 | 0.102 | 0.251 | 1.76E-05    | PA-5 |
| Grb10        | 9.94E-10 | -0.553 | 0.638 | 0.725 | 1.98E-05    | PA-5 |
| Ccnd3.1      | 1.03E-09 | 0.519  | 0.666 | 0.537 | 2.06E-05    | PA-5 |
| Cdh9.3       | 1.28E-09 | -0.691 | 0.215 | 0.375 | 2.56E-05    | PA-5 |
| Ptgis.2      | 1.45E-09 | -0.550 | 0.154 | 0.308 | 2.89E-05    | PA-5 |
| Fam20a.2     | 1.77E-09 | -0.529 | 0.382 | 0.535 | 3.53E-05    | PA-5 |
| Rcan2.1      | 1.79E-09 | -0.557 | 0.519 | 0.656 | 3.57E-05    | PA-5 |
| Tanc1        | 1.86E-09 | 0.593  | 0.526 | 0.367 | 3.72E-05    | PA-5 |
| Jpt1.2       | 2.02E-09 | -0.529 | 0.174 | 0.334 | 4.04E-05    | PA-5 |
| Fryl         | 2.32E-09 | 0.551  | 0.659 | 0.487 | 4.62E-05    | PA-5 |
| Pcsk5.1      | 2.43E-09 | -0.663 | 0.587 | 0.681 | 4.85E-05    | PA-5 |
| Lmx1a.2      | 3.33E-09 | -0.592 | 0.15  | 0.305 | 6.66E-05    | PA-5 |
| Eya4.3       | 3.50E-09 | -0.728 | 0.276 | 0.428 | 6.98E-05    | PA-5 |
| Gabra3.2     | 4.14E-09 | -0.743 | 0.369 | 0.513 | 8.27E-05    | PA-5 |
| Rhoq.3       | 4.62E-09 | -0.529 | 0.519 | 0.614 | 9.22E-05    | PA-5 |
| Pgm3         | 6.05E-09 | -0.516 | 0.195 | 0.348 | 0.00012081  | PA-5 |
| Ahnak2.1     | 6.84E-09 | -0.546 | 0.239 | 0.385 | 0.00013644  | PA-5 |
| Adamts13.2   | 7.56E-09 | -0.766 | 0.212 | 0.365 | 0.000150961 | PA-5 |
| Acss3.1      | 8.14E-09 | -0.550 | 0.519 | 0.625 | 0.000162562 | PA-5 |
| lqsec1.3     | 8.34E-09 | -0.536 | 0.314 | 0.462 | 0.000166464 | PA-5 |
| 1700019D03Ri | 8.74E-09 | -0.539 | 0.133 | 0.274 | 0.000174375 | PA-5 |
| Basp1.3      | 1.02E-08 | -0.603 | 0.232 | 0.379 | 0.000204277 | PA-5 |
| CT010467.1   | 1.20E-08 | -0.579 | 0.785 | 0.821 | 0.000240144 | PA-5 |
| Pde10a.1     | 1.55E-08 | -0.615 | 0.3   | 0.438 | 0.000308499 | PA-5 |
| Stox2        | 1.58E-08 | 0.955  | 0.433 | 0.293 | 0.000314703 | PA-5 |
| Hexb.1       | 1.74E-08 | -0.584 | 0.314 | 0.451 | 0.000347694 | PA-5 |
| Bicd1.2      | 2.24E-08 | -0.602 | 0.27  | 0.406 | 0.000447113 | PA-5 |
| Gas7.3       | 2.66E-08 | -0.506 | 0.826 | 0.864 | 0.000531644 | PA-5 |
| Clip4.2      | 2.86E-08 | -0.503 | 0.167 | 0.311 | 0.000571846 | PA-5 |
| Sgce         | 3.53E-08 | -0.521 | 0.403 | 0.526 | 0.000705224 | PA-5 |
| Nipal2.2     | 3.58E-08 | -0.666 | 0.225 | 0.359 | 0.000713835 | PA-5 |
| Fhl1.3       | 4.71E-08 | -0.510 | 0.253 | 0.4   | 0.000940246 | PA-5 |
| Crim1        | 4.86E-08 | 0.564  | 0.509 | 0.361 | 0.000969138 | PA-5 |
| Abca8b.1     | 5.45E-08 | -0.583 | 0.341 | 0.479 | 0.001087102 | PA-5 |



|            |           |        |       |       |             |      |
|------------|-----------|--------|-------|-------|-------------|------|
| Nr3c2.1    | 5.74E-08  | 0.562  | 0.563 | 0.408 | 0.001144857 | PA-5 |
| Smurf1.3   | 7.74E-08  | -0.542 | 0.509 | 0.587 | 0.001544249 | PA-5 |
| Megf9.2    | 1.04E-07  | -0.522 | 0.382 | 0.503 | 0.002073699 | PA-5 |
| Cdh13.2    | 1.54E-07  | 0.788  | 0.58  | 0.446 | 0.003078013 | PA-5 |
| Sdc2       | 1.61E-07  | -0.584 | 0.529 | 0.631 | 0.003218678 | PA-5 |
| Hspa5      | 3.03E-07  | -0.576 | 0.212 | 0.342 | 0.006045377 | PA-5 |
| Jun        | 3.30E-07  | -0.523 | 0.181 | 0.306 | 0.006578525 | PA-5 |
| Hsp90b1    | 3.37E-07  | -0.632 | 0.242 | 0.362 | 0.006731566 | PA-5 |
| Lars2.1    | 3.59E-07  | -0.617 | 0.549 | 0.636 | 0.007160345 | PA-5 |
| C1qtnf7    | 5.02E-07  | -0.601 | 0.396 | 0.509 | 0.010011753 | PA-5 |
| Slc16a9.2  | 5.98E-07  | -0.550 | 0.218 | 0.337 | 0.011928184 | PA-5 |
| Ptprk.2    | 8.53E-07  | 0.526  | 0.372 | 0.243 | 0.01701791  | PA-5 |
| Plekhg1    | 1.65E-06  | 0.613  | 0.526 | 0.401 | 0.033012301 | PA-5 |
| Adcy2.2    | 2.26E-06  | -0.544 | 0.3   | 0.419 | 0.045145703 | PA-5 |
| Sorbs1     | 3.79E-06  | 0.687  | 0.259 | 0.169 | 0.075632703 | PA-5 |
| Syne1      | 4.05E-06  | 0.508  | 0.543 | 0.423 | 0.080852092 | PA-5 |
| Ptpm       | 4.09E-06  | 0.838  | 0.829 | 0.758 | 0.08168195  | PA-5 |
| Tmem178b.1 | 4.10E-06  | -0.602 | 0.276 | 0.382 | 0.081837297 | PA-5 |
| Col12a1.2  | 5.01E-06  | -0.677 | 0.225 | 0.337 | 0.09999392  | PA-5 |
| Galnt18.1  | 6.69E-06  | 1.023  | 0.276 | 0.186 | 0.133503228 | PA-5 |
| Sntg1.4    | 6.77E-06  | -1.033 | 0.365 | 0.463 | 0.135064739 | PA-5 |
| Pcdh9.2    | 3.24E-05  | -0.709 | 0.464 | 0.537 | 0.646685633 | PA-5 |
| Gpc3.1     | 5.39E-05  | -0.636 | 0.27  | 0.367 | 1           | PA-5 |
| Calcl.3    | 9.99E-05  | -0.525 | 0.416 | 0.494 | 1           | PA-5 |
| Vim        | 0.0001333 | -0.593 | 0.201 | 0.292 | 1           | PA-5 |

| Extended Data Table 9 Oligonucleotides |                               |
|----------------------------------------|-------------------------------|
| siRNA                                  | sense                         |
| Ctrl-1                                 | UGGUUUACAUGUCGACUAA           |
| Ctrl-2                                 | UGGUUUACAUGUUGUGUGA           |
| Ctrl-3                                 | UGGUUUACAUGUUUUCUGA           |
| Ctrl-4                                 | UGGUUUACAUGUUUCCUA            |
| si-Cgref1-1                            | CAG AGA AGG UGC UGA GGA ATT   |
| si-Cgref1-2                            | AGG AAC AGG UGG AGA UCA ATT   |
| si-Cgref1-3                            | CAA UGA AGG AGA AGC CAA ATT   |
| si-Colec11-1                           | UCA ACU GAC AAC UGA GCU ATT   |
| si-Colec11-2                           | CAA CUG ACA ACU GAG CUA ATT   |
| si-Colec11-3                           | GGA CAA CCA GGU CAC UCA ATT   |
| si-Cpb1-1                              | GGG CUU AUG AUC AGG GAA UTT   |
| si-Cpb1-2                              | AGG AGA ACU UUG AUG GCA ATT   |
| si-Cpb1-3                              | GGU GAA AGG UGC AGC AAA GTT   |
| si-Edn3-1                              | CUG GGA AAC AAG AGG ACA ATT   |
| si-Edn3-2                              | GCA GAA GAG AUG CGG GAG ATT   |
| si-Edn3-3                              | CCA GAG AUG UCA CCA GUU ATT   |
| si-Kazald1-1                           | UCA CAU UCC AAA UAU UGU GAT T |
| si-Kazald1-2                           | AGU AAU CGC CCA ACU CUU CAT T |
| si-Kazald1-3                           | UUA AAC AAU CCA UGU AAG GAT T |
| si-Lgi1-1                              | GAG CAA AGC AAC ACA GCU ATT   |
| si-Lgi1-2                              | GGA AUA UAA GAA ACG GAA ATT   |
| si-Lgi1-3                              | CAA CAC AGC UAU UCA CUA ATT   |
| si-Lgr4-1                              | GCA GUC ACC UCC GAC AGUU      |
| si-Lgr4-2                              | GCA CGU UGC UUG GCU CAUC      |
| si-Lgr4-3                              | GCC AUU AUC UAC AUU AAAC      |
| si-Lgr4-4                              | GAA ACA CGG AUC AGU CUCA      |
| si-Lgr5-1                              | GCA UUU GCC UGA ACU AAGA      |
| si-Lgr5-2                              | GUA GCU GGC UGA UCC GAAU      |
| si-Lgr5-3                              | GUA CAU CUC UUC CAU AAAG      |
| si-Lgr5-4                              | GGA AUC GGC UGC CAA AUCG      |
| si-Lgr6-1                              | GGA CUU UCA UCC AGA GGA AUU   |
| si-Lgr6-2                              | ACA ACA ACA UCA AGG CUA UUU   |
| si-Lgr6-3                              | GAA AUU GGC CUC CGA CAU AUU   |
| si-Ndp-1                               | GGG AGA UAC AGA CAG CAA ATT   |
| si-Ndp-2                               | CAG CAC UGU CCU CAA GCA ATT   |
| si-Ndp-3                               | GCU GCA UGA GAC ACC AUU ATT   |
| si-Nog-1                               | CCG AGG GCA UGG UGU GUA ATT   |
| si-Nog-2                               | CCA UCA UUU CCG AGU GUA ATT   |
| si-Nog-3                               | UCU UUG ACC CUA AGG AGA ATT   |
| si-Rspo2-1                             | AGA CGC AAU AAG CGA GCUA      |
| si-Rspo2-2                             | GUU GGU CAU UGG AGC GAAU      |
| si-Rspo2-3                             | GGG CUU GAU UCU AAC CGUA      |
| si-Rspo2-4                             | GGA CAA UGG UUG CAG CCGA      |
| si-S100a9-1                            | UGG CAA CCU UUA UGA AGA ATT   |
| si-S100a9-2                            | GUG GAA GCA CAG UUG GCA ATT   |
| si-S100a9-3                            | UGG ACA CAA ACC AGG ACA ATT   |
| si-Serpinb6c-1                         | GGA CAG GAU GAA AGG AGA ATT   |
| si-Serpinb6c-2                         | GGG UGA AGA CAG AUC CAA ATT   |
| si-Serpinb6c-3                         | AGG CAC UGU CUU UGG GUA ATT   |
|                                        |                               |

|             |                                    |
|-------------|------------------------------------|
| Primers     |                                    |
| Adam12-for  | ATG GCA CCC ATC ATG AGC            |
| Adam12-rev  | GGG GGC TGT CTG AAT GGT            |
| Anxa3-for   | GCA GTA CCA AGC AGC GTA TG         |
| Anxa3-rev   | GCC AGA GAG ATC ACC CTT CA         |
| Axl-for     | TAT ACC CTC GGC TGG GGA TG         |
| Axl-rev     | AGG TGG GGG TTC ACT CAC T          |
| Bgn-for     | TGC CAT GTG TCC TTT CGG TT         |
| Bgn-rev     | CAG GTC TAG CAG TGT GGT GTC        |
| C7-for      | ATG TCA GCC TTG GGA GAA AC         |
| C7-rev      | CTA CTC TCA TCT CGG GCA CA         |
| CD142-for   | GGG GAG CCT CTG TAT GAG AA         |
| CD142-rev   | ATT GTT GGC TGT CCG AGG T          |
| CD55-for    | ACT GTT GAT TGG GAC GAT GAG        |
| CD55-rev    | TGG TGG CTC TGG ACA ATG TA         |
| Cebpa-for   | GGT GCG CAA GAG CCG AGA TAA A      |
| Cebpa-rev   | CCC CGC AGC GTG TCC AGT T          |
| Cgref1-for  | CCA CTA TTG CTG CTC CCT TT         |
| Cgref1-rev  | TTG TAC CTC AGG GTC CAA CC         |
| Col4a1-for  | CTC TCC AGG GAT CAC AGG TT         |
| Col4a1-rev  | AGC CCT TTC TGA CCT TGA AA         |
| Col4a2-for  | AGC TCC TGA CCC TGA GGT TA         |
| Col4a2-rev  | TCC ATG ATC CCA GTC TTT GA         |
| Colec11-for | GCT CTG TGC AGA TTC TTG TCC        |
| Colec11-rev | GTC CTG GGG CTC CTT TGT            |
| Cpb1-for    | TGG TTT CCA CGC AAG AGA GT         |
| Cpb1-rev    | TCT CTT GTT TAT AGG TAC GGA CAG C  |
| Col18a1-For | GCT CAC CAG TTT GGT CTT GC         |
| Col18a1-Rev | CCA CCT CCT CAG CAA CAT TC         |
| Dpp4-for    | CGG TAT CAT TTA GTA AAG AGG CAA A  |
| Dpp4-rev    | GTA GAG TGT AGA GGG GCA GAC C      |
| Edn3-for    | GAG ATG CGG GAG ACT GGA            |
| Edn3-rev    | GGG AGA GCA GGT GAA GTC C          |
| Efhd1-for   | TCT GGA GAA GAT GTT CAA AAC G      |
| Efhd1-rev   | TTT CAG CTC CAT CAG GTC AA         |
| Fmo2-for    | TTC AGT GAC TTC CCG ATG C          |
| Fmo2-rev    | CAC ACT AAT GAC AGT GGT CTG AAA    |
| Fth1-for    | TGG AGT TGT ATG CCT CCT ACG        |
| Fth1-rev    | TGG AGA AAG TAT TTG GCA AAG TT     |
| Gna14a-for  | TCC GAG ACA GAG GGT GAT CT         |
| Gna14a-rev  | CCT GGT CCA GAA GCA CTT G          |
| Icam1-for   | TGG TAG ACA GCA TTT ACC CTC A      |
| Icam1-rev   | GGC CAC CAT CCT GTT CTG            |
| Igfbp3-For  | AAG CAC AGA CAC CCA GAA CT         |
| Igfbp3-Rev  | GCG GCA CTG CTT CTT CTT AT         |
| Kazald1-for | GCT AAC CTC ACT GTG GTG CAT        |
| Kazald1-rev | AAT ATT GTG AGG CTG CGA CA         |
| Lgi1-for    | ATG GGA ACA ACC AGA GCA AC         |
| Lgi1-rev    | TTT GCC TCT TCC CTT TAA GTC A      |
| Lgr4-for    | CAG TTA CCA GAA GAT GCA TTT AAG AA |
| Lgr4-rev    | CAA GGC TTT TGG GTG GAT AA         |
| Lgr5-for    | GTG TCT TTT TGC CTT TTG ACG        |

|                    |                                   |
|--------------------|-----------------------------------|
| Lgr5-rev           | TGT CAG TCC AAG AAA CTG GTG T     |
| Lgr6-for           | GAG CTC GGG CTC TCA GTG           |
| Lgr6-rev           | GAG GTT GTT CAT ACT GAG GTC TAG G |
| Lpl-for            | GCA CTC ACC TTT AAT CCC AGC ACT   |
| Lpl-rev            | TCC CTC CCT CTT CTT CTT CTC CTT   |
| Meox2-for          | AAT CTA GAC CTC ACT GAA AGA CAG G |
| Meox2-rev          | CTT GCT GTC CCC CTT TGA           |
| Mgp-for            | GGC AAC CCT GTG CTA CGA AT        |
| Mgp-rev            | CCT GGA CTC TCT TTT GGG CTT TA    |
| Ndp-for            | GCT TTC TGA CTG GCA CAA CC        |
| Ndp-rev            | TTT CTT GCC AGT CCG TCT CT        |
| Nog-for            | AGA CAA ACC GGT GCC AAC           |
| Nog-rev            | TGG GCC ACT TCT CTC TGC           |
| Pi16-for           | GTG CGG CCA CTA CAC TCA G         |
| Pcsk6-For          | GAA CCT CCT GCA TCA CCA AC        |
| Pcsk6-Rev          | GGA TGA AGA GCT TCC GTT CG        |
| Pi16-rev           | CAC CAG CAA ATG GAT GTT AGC       |
| Pparg-for          | GCA TGG TGC CTT CGC TGA           |
| Pparg-rev          | TGG CAT CTC TGT GTC AAC CAT G     |
| Rspo1-for          | CGA CAT GAA CAA ATG CAT CA        |
| Rspo1-rev          | CTC CTG ACA CTT GGT GCA GA        |
| Rspo2-for          | GCC CAT CAG GGT ATT ATG GA        |
| Rspo2-rev          | TCA CAG TTT TCT ATT CTG CAT CG    |
| Rspo3-for          | GCG AAG AAT GCA TCC TAA TGT       |
| Rspo3-rev          | CAG CCA TTG TAA TCT GAA CAC G     |
| Rspo4-for          | TCT GAG TCC AGG AAG TGT CCT AT    |
| Rspo4-rev          | TGT TCT TCT GCC TGG GAT TT        |
| Rtp3-for           | CGC AAT ACC AGC AAA AGA CC        |
| Rtp3-rev           | CTA TCA GAA CTC GGC CAG ATG       |
| S100a9-for         | GAC ACC CTG ACA CCC TGA G         |
| S100a9-rev         | TGA GGG CTT CAT TTC TCT TCT C     |
| Sdc1-For           | AAG TGC TGG GAG GTG TCA TT        |
| Sdc1-Rev           | TGC TTG GTG GGT TTC TGG TA        |
| Sema3c-for         | ATA TCC TCG CCC AGG AAC TT        |
| Sema3c-rev         | TGG GAA GTC CTT GGT GGT T         |
| Serpib6c-for       | CTG CTC ATC TTG CTA TCT CCA G     |
| Serpib6c-rev       | AAA GGT TTA AGG CAA AAG TAG CAT T |
| Smpd3-for          | TCT ACC TCC TCG ACC AGC AC        |
| Smpd3-rev          | TGC TGC TCC AGT TTG TCA TC        |
| Sparcl1-for        | GGC AAT CCC GAC AAG TAC AAG       |
| Sparcl1-rev        | TGG TTT TCT ATG TCT GCT GTA GC    |
| Spink2-for         | TGT TCG CTG CAC AGG AGA           |
| Spink2-for         | ATG GGA ACA ACC AGA GCA AC        |
| Spink2-rev         | TGA GAA TCG GAA GAG TCG AGA       |
| Spink2-rev         | TTT GCC TCT TCC CTT TAA GTC A     |
| Tspan11-for        | ATC ACA GCG TCG GTG GAC           |
| Tspan11-rev        | GCT GAG CTG TTA CTG CCA CA        |
| Vap1-for           | ACC CAC AGC GCT CAC TTC           |
| Vap1-rev           | GGG GAC AAA AGC CAT ATC CT        |
| Vit-for            | AAA CGC CAA AGA AGA CTA AAA GG    |
| Vit-rev            | AGC TTT GAC ATC GCA GTT GA        |
| Recombined NucRed- | TTGATTTGATACCGCGGGC               |

|                    |                       |
|--------------------|-----------------------|
| Recombined NucRed- | GCGCATGAACTCTTTGATGAC |
| ApoB For           | GTCCAGGTTGAATCACGGGT  |
| ApoB Rev           | AGGATCCTGCAAGGTCAAGC  |
