# Supplementary material for: Identification of a regulatory pathway inhibiting adipogenesis via RSPO2
Source: Springer Nature journal article supplement (doi:10.1038/s42255-021-00509-1), 2022-01-13

Extended Data Fig.5I

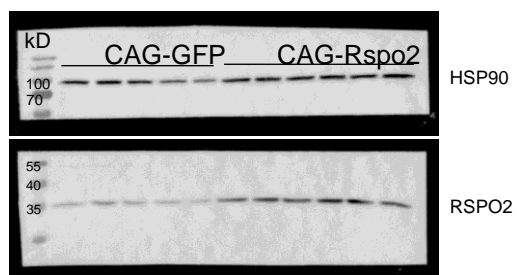

Supplement: MOESM18 [file 42255_2021_509_MOESM18_ESM.pdf › 42255_2021_509_MOESM18_ESM.pdf]
